# Supplementary material for: The global, regional, and national burden of cirrhosis by cause in 195 countries and territories, 1990–2017: a systematic analysis for the Global Burden of Disease Study 2017
Source: PubMed Central journal article supplement (PMC7026710; doi:10.1016/s2468-1253(19)30349-8), 2020-01-22

# THE LANCET

## Gastroenterology & Hepatology

### Supplementary appendix

This appendix formed part of the original submission and has been peer reviewed. We post it as supplied by the authors.

Supplement to: GBD 2017 Cirrhosis Collaborators. The global, regional, and national burden of cirrhosis by cause in 195 countries and territories, 1990–2017: a systematic analysis for the Global Burden of Disease Study 2017. *Lancet Gastroenterol Hepatol* 2020; published online Jan 22. [https://doi.org/10.1016/S2468-1253\(19\)30349-8](https://doi.org/10.1016/S2468-1253(19)30349-8).

## **Supplementary appendix**

Supplement to: **Global, regional, and national burden of cirrhosis by cause in 195 countries and territories, 1990–2017: a systematic analysis for the Global Burden of Disease Study 2017**

## Contents:

### Appendix Tables

**Appendix Table 1:** ICD-10 codes mapped to GBD cause list for cirrhosis. GBD=Global Burden of Disease.

**Appendix Table 2:** Number of site-years of data in GBD. GBD=Global Burden of Disease.

**Appendix Table 3:** Deaths and age-standardised death rates due to cirrhosis in 1990 and 2017 for both sexes and percentage change of age-standardised rates per 100 000 by location

**Appendix Table 4:** DALYs and age-standardised DALY rates due to cirrhosis in 1990 and 2017 for both sexes and percentage change of age-standardised rates per 100 000 by location. DALYs=disability-adjusted life-years.

**Appendix Table 5:** Prevalent cases and age-standardised prevalence rates of decompensated cirrhosis per 100 000 in 1990 and 2017 for both sexes combined by location

**Appendix Table 6:** Prevalent cases and age-standardised prevalence rates of compensated cirrhosis per 100 000 in 1990 and 2017 for both sexes combined by location

**Appendix Table 7:** Proportion of causes for deaths due to cirrhosis in 2017 in both sexes

**Appendix Table 8:** Proportion of causes for prevalent cases of decompensated cirrhosis in 2017 in both sexes

**Appendix Table 9:** Proportion of causes for prevalent cases of compensated cirrhosis in 2017 in both sexes

**Appendix Table 10:** Proportion of causes for DALYs due to cirrhosis in 2017 in both sexes. DALYs=disability-adjusted life-years.

**Appendix Table 11:** Number of deaths and age-standardised death rates of cirrhosis due to hepatitis B per 100 000 in 1990 and 2017 for both sexes and the percentage change by location

**Appendix Table 12:** Number of deaths and age-standardised death rates of cirrhosis due to hepatitis C per 100 000 in 1990 and 2017 for both sexes and the percentage change by location

**Appendix Table 13:** Number of deaths and age-standardised death rates of cirrhosis due to alcohol-related liver disease per 100 000 in 1990 and 2017 for both sexes and the percentage change by location

**Appendix Table 14:** Number of deaths and age-standardised death rates of cirrhosis due to non-alcoholic steatohepatitis (NASH) per 100 000 in 1990 and 2017 for both sexes and the percentage change by location

**Appendix Table 15:** Number of deaths and age-standardised death rates of cirrhosis due to other causes per 100 000 in 1990 and 2017 for both sexes and the percentage change by location

**Appendix Table 16:** Number of prevalent cases and age-standardised prevalence rates of decompensated cirrhosis due to hepatitis B per 100 000 in 1990 and 2017 for both sexes by location

**Appendix Table 17:** Number of prevalent cases and age-standardised prevalence rates of decompensated cirrhosis due to hepatitis C per 100 000 in 1990 and 2017 for both sexes by location

**Appendix Table 18:** Number of prevalent cases and age-standardised prevalence rates of decompensated cirrhosis due to alcohol-related liver disease per 100 000 in 1990 and 2017 for both sexes by location

**Appendix Table 19:** Number of prevalent cases and age-standardised prevalence rates of decompensated cirrhosis due to non-alcoholic steatohepatitis (NASH) per 100 000 in 1990 and 2017 for both sexes by location

**Appendix Table 20:** Number of prevalent cases and age-standardised prevalence rates of decompensated cirrhosis due to other causes per 100 000 in 1990 and 2017 for both sexes by location

**Appendix Table 21:** Number of prevalent cases and age-standardised prevalence rates of compensated cirrhosis due to hepatitis B per 100 000 in 1990 and 2017 for both sexes by location

**Appendix Table 22:** Number of prevalent cases and age-standardised prevalence rates of compensated cirrhosis due to hepatitis C per 100 000 in 1990 and 2017 for both sexes by location

**Appendix Table 23:** Number of prevalent cases and age-standardised prevalence rates of compensated cirrhosis due to alcohol-related liver disease per 100 000 in 1990 and 2017 for both sexes by location

**Appendix Table 24:** Number of prevalent cases and age-standardised prevalence rates of compensated cirrhosis due to non-alcoholic steatohepatitis (NASH) per 100 000 in 1990 and 2017 for both sexes by location

**Appendix Table 25:** Number of prevalent cases and age-standardised prevalence rates of compensated cirrhosis due to other causes per 100 000 in 1990 and 2017 for both sexes by location

**Appendix Table 26:** Data quality rating from 0 to 5 stars, maximum percentage well-certified per five-year interval and percentage well-certified across time series for 195 countries and territories, 1980–2017

**Appendix Table 27:** Parent cirrhosis CODEm model covariate table

## Appendix Figures

**Appendix Figure 1:** Trends in age-standardised death rates from 1990 to 2017 for both sexes across seven super-regions

**Appendix Figure 2:** The trend of age-standardised death rate of cirrhosis due to hepatitis B across regions from 1990 to 2017, versus the levels of SDI. The black line represents expected rates based solely on SDI. For each region, points from left to right depict estimates for each year from 1990 to 2017. SDI=Socio-demographic Index.

**Appendix Figure 3:** The trend of age-standardised death rate of cirrhosis due to hepatitis C across regions from 1990 to 2017, versus the levels of SDI. The black line represents expected rates based solely on SDI. For each region, points from left to right depict estimates for each year from 1990 to 2017. SDI=Socio-demographic Index.

**Appendix Figure 4:** The trend of age-standardised death rate of cirrhosis due to alcohol-related liver disease across regions from 1990 to 2017, versus the levels of SDI. The black line represents expected rates based solely on SDI. For each region, points from left to right depict estimates for each year from 1990 to 2017. SDI=Socio-demographic Index.

**Appendix Figure 5:** The trend of age-standardised death rate of cirrhosis due to NASH across regions from 1990 to 2017, versus the levels of SDI. NASH=non-alcoholic steatohepatitis. The black line represents expected rates based solely on SDI. For each region, points from left to right depict estimates for each year from 1990 to 2017. SDI=Socio-demographic Index.

**Appendix Figure 6:** The trend of age-standardised death rate of cirrhosis due to other causes across regions from 1990 to 2017, versus the levels of SDI. The black line represents expected rates based solely on SDI. For each region, points from left to right depict estimates for each year from 1990 to 2017. SDI=Socio-demographic Index.

**Appendix Figure 7:** The counts and age-standardised rates of mortality by cause across age groups in 2017

**Appendix Figure 8:** The proportion of YLLs and YLDs out of DALYs by age in 2017. YLLs=years of life lost due to premature death. YLDs=years lived with disability. DALYs=disability-adjusted life-years.

**Appendix Figure 9:** The age pattern of numbers and rates of death at regional level in 1990, 2000, 2010, and 2017.

**Appendix Figure 10:** The trend of age-standardised rates of A) deaths, B) DALYs due to cirrhosis across nations in 2017, versus levels of SDI. DALYs=disability-adjusted life-years. SDI=Socio-demographic Index.

**Appendix Table 1: ICD-10 codes mapped to GBD cause list for cirrhosis**

| ICD-10 code | Definition                                               | GBD cirrhosis cause           |                               |
|-------------|----------------------------------------------------------|-------------------------------|-------------------------------|
| <b>B18</b>  | <b>Chronic viral hepatitis</b>                           |                               |                               |
| B18.0       | Chronic viral hepatitis B with delta-agent               | Cirrhosis due to hepatitis B  |                               |
| B18.1       | Chronic viral hepatitis B without delta-agent            |                               |                               |
| B18.2       | Chronic viral hepatitis C                                |                               |                               |
| B18.8       | Other chronic viral hepatitis                            |                               |                               |
| B18.9       | Chronic viral hepatitis, unspecified                     |                               |                               |
| <b>K70</b>  | <b>Alcoholic liver disease</b>                           | Alcoholic liver disease       |                               |
| K70.0       | Alcoholic fatty liver                                    |                               |                               |
| K70.1       | Alcoholic hepatitis                                      |                               |                               |
| K70.10      | Alcoholic hepatitis without ascites                      |                               |                               |
| K70.11      | Alcoholic hepatitis with ascites                         |                               |                               |
| K70.2       | Alcoholic fibrosis and sclerosis of liver                |                               |                               |
| K70.3       | Alcoholic cirrhosis of liver                             |                               |                               |
| K70.30      | Alcoholic cirrhosis of liver without ascites             |                               |                               |
| K70.31      | Alcoholic cirrhosis of liver with ascites                |                               |                               |
| K71.7       | Toxic liver disease with fibrosis and cirrhosis of liver |                               | Cirrhosis due to other causes |
| <b>K73</b>  | <b>Chronic hepatitis, not elsewhere classified</b>       |                               |                               |
| K73.0       | Chronic persistent hepatitis, not elsewhere classified   |                               |                               |
| K73.1       | Chronic lobular hepatitis, not elsewhere classified      |                               |                               |
| K73.2       | Chronic active hepatitis, not elsewhere classified       |                               |                               |
| K73.8       | Other chronic hepatitis, not elsewhere classified        |                               |                               |
| K73.9       | Chronic hepatitis, unspecified                           |                               |                               |
| K75.2       | Nonspecific reactive hepatitis                           |                               |                               |
| K75.4       | Autoimmune hepatitis                                     |                               |                               |
| K75.8       | Other specified inflammatory liver diseases              |                               |                               |
| K75.81      | Nonalcoholic steatohepatitis (NASH)                      | Cirrhosis due to NASH         |                               |
| K75.89      | Other specified inflammatory liver diseases              | Cirrhosis due to other causes |                               |
| K75.9       | Inflammatory liver disease, unspecified                  |                               |                               |
| <b>K76</b>  | <b>Other diseases of liver</b>                           |                               |                               |
| K76.1       | Chronic passive congestion of liver                      |                               |                               |
| K76.2       | Central hemorrhagic necrosis of liver                    |                               |                               |
| K76.4       | Peliosis hepatitis                                       |                               |                               |
| K76.5       | Hepatic veno-occlusive disease                           |                               |                               |
| K76.6       | Portal hypertension                                      |                               |                               |
| K76.7       | Hepatorenal syndrome                                     |                               |                               |
| K76.8       | Other specified diseases of liver                        |                               |                               |
| K76.81      | Hepatopulmonary syndrome                                 |                               |                               |
| K76.89      | Other specified diseases of liver                        |                               |                               |
| K76.9       | Liver disease, unspecified                               |                               |                               |
| K77.8       | Liver disorders in other diseases classified elsewhere   |                               |                               |

ICD=International Classification of Diseases. GBD=Global Burden of Disease.

**Appendix Table 2. Number of site-years of data in GBD**

|                                             | Hepatitis B | Hepatitis C | Alcohol-related liver disease | NASH | Other |
|---------------------------------------------|-------------|-------------|-------------------------------|------|-------|
| Site-years (total)                          | 76          | 80          | 55                            | 24   | 34    |
| Number of countries with data               | 32          | 35          | 23                            | 14   | 18    |
| Number of GBD super-regions with data (n=7) | 7           | 7           | 6                             | 5    | 6     |
| Number of GBD regions with data (n=21)      | 17          | 17          | 13                            | 10   | 11    |

GBD=Global Burden of Disease. NASH=non-alcoholic steatohepatitis.

**Appendix Table 3: Deaths and age-standardised death rates due to cirrhosis in 1990 and 2017 for both sexes and percentage change of age-standardised rates per 100 000 by location**

|                                  | 1990                       |                      | 2017                          |                      | Percentage change in age-standardised rates between 1990 and 2017 |
|----------------------------------|----------------------------|----------------------|-------------------------------|----------------------|-------------------------------------------------------------------|
|                                  | Counts (95% UI)            | Rate (95% UI)        | Counts (95% UI)               | Rate (95% UI)        |                                                                   |
| <b>Global</b>                    | 898991<br>(828934, 948209) | 21<br>(19.2, 22.3)   | 1322868<br>(1268197, 1449133) | 16.5<br>(15.8, 18.1) | -21.7<br>(-28.2, -12.2)                                           |
| <b>High-income North America</b> | 38759<br>(37543, 39457)    | 11.5<br>(11.1, 11.7) | 67346<br>(65130, 69616)       | 11.8<br>(11.4, 12.2) | 3.2<br>(-0.4, 7.8)                                                |
| <b>Canada</b>                    | 2944<br>(2835, 3042)       | 9<br>(8.7, 9.3)      | 4845<br>(4492, 5234)          | 7.5<br>(7, 8.1)      | -16.7<br>(-23, -9.7)                                              |
| <b>Greenland</b>                 | 4<br>(4, 5)                | 9.4<br>(8, 11.3)     | 7<br>(5, 8)                   | 9.2<br>(7, 10.5)     | -1.1<br>(-30.7, 26.8)                                             |
| <b>USA</b>                       | 35810<br>(34608, 36500)    | 11.7<br>(11.4, 12)   | 62493<br>(60414, 64625)       | 12.3<br>(11.9, 12.8) | 5.2<br>(1.2, 10.2)                                                |
| <b>Australasia</b>               | 1534<br>(1468, 1579)       | 6.6<br>(6.4, 6.8)    | 2479<br>(2234, 2744)          | 5.4<br>(4.9, 6)      | -18.2<br>(-26.7, -8.4)                                            |
| <b>Australia</b>                 | 1339<br>(1269, 1383)       | 6.9<br>(6.6, 7.2)    | 2187<br>(1953, 2450)          | 5.7<br>(5.1, 6.4)    | -17.7<br>(-27.2, -6.7)                                            |
| <b>New Zealand</b>               | 195<br>(184, 208)          | 5<br>(4.8, 5.4)      | 292<br>(270, 319)             | 3.9<br>(3.6, 4.3)    | -22.3<br>(-28.5, -15.4)                                           |
| <b>High-income Asia Pacific</b>  | 37974<br>(37236, 38668)    | 18.7<br>(18.3, 19.1) | 35078<br>(32398, 37041)       | 8.6<br>(7.9, 9.1)    | -54.1<br>(-58, -51.2)                                             |
| <b>Brunei</b>                    | 14<br>(12, 16)             | 11.3<br>(9.7, 12.8)  | 25<br>(21, 31)                | 6.6<br>(5.7, 9.2)    | -41.3<br>(-52.6, -16.1)                                           |
| <b>Japan</b>                     | 22684<br>(22208, 23074)    | 13.4<br>(13.1, 13.7) | 25352<br>(23653, 26613)       | 7.6<br>(7, 8)        | -43.6<br>(-47.4, -40.7)                                           |
| <b>Singapore</b>                 | 193<br>(182, 202)          | 8.1<br>(7.6, 8.4)    | 254<br>(227, 280)             | 3.7<br>(3.3, 4)      | -54.8<br>(-59.5, -50.4)                                           |
| <b>South Korea</b>               | 15083<br>(14611, 15612)    | 43.9<br>(42.3, 45.3) | 9447<br>(8152, 10528)         | 11.2<br>(9.7, 12.5)  | -74.4<br>(-78, -71.1)                                             |
| <b>Western Europe</b>            | 81430<br>(80035, 82972)    | 14.8<br>(14.6, 15.1) | 74230<br>(70803, 78164)       | 9.1<br>(8.7, 9.6)    | -38.7<br>(-41.6, -35.4)                                           |
| <b>Andorra</b>                   | 6<br>(5, 8)                | 10.7<br>(7.9, 13.6)  | 10<br>(8, 13)                 | 7.5<br>(5.6, 9.7)    | -29.8<br>(-47.5, -7.3)                                            |
| <b>Austria</b>                   | 2287<br>(2226, 2359)       | 21.2<br>(20.6, 21.9) | 1860<br>(1710, 2002)          | 11.6<br>(10.7, 12.6) | -45.1<br>(-49.7, -40)                                             |
| <b>Belgium</b>                   | 1702<br>(1635, 1782)       | 11.7<br>(11.3, 12.2) | 2004<br>(1832, 2171)          | 9.7<br>(8.8, 10.5)   | -17.1<br>(-24.6, -9.9)                                            |
| <b>Cyprus</b>                    | 90<br>(71, 115)            | 11<br>(8.8, 14.2)    | 123<br>(106, 141)             | 6.6<br>(5.7, 7.6)    | -40.3<br>(-55.3, -22.6)                                           |
| <b>Denmark</b>                   | 734<br>(704, 771)          | 10.6<br>(10.2, 11.1) | 947<br>(869, 1030)            | 9.5<br>(8.7, 10.3)   | -10.7<br>(-19.3, -0.8)                                            |
| <b>Finland</b>                   | 572<br>(545, 612)          | 8.6<br>(8.2, 9.1)    | 1178<br>(1073, 1283)          | 12.5<br>(11.4, 13.7) | 45.7<br>(29, 62.6)                                                |

|                               |                         |                      |                         |                      |                         |
|-------------------------------|-------------------------|----------------------|-------------------------|----------------------|-------------------------|
| <b>France</b>                 | 13236<br>(12799, 13868) | 17.1<br>(16.6, 17.9) | 10621<br>(9656, 11575)  | 8.9<br>(8.1, 9.8)    | -47.7<br>(-53.3, -42.6) |
| <b>Germany</b>                | 20334<br>(19655, 20935) | 17.1<br>(16.6, 17.6) | 19558<br>(17400, 21904) | 11.9<br>(10.6, 13.3) | -30.5<br>(-38.4, -22)   |
| <b>Greece</b>                 | 1598<br>(1521, 1664)    | 10.5<br>(10, 10.9)   | 1308<br>(1204, 1428)    | 5.9<br>(5.5, 6.4)    | -43.8<br>(-48.6, -38.5) |
| <b>Iceland</b>                | 12<br>(11, 13)          | 4.4<br>(4.1, 4.7)    | 19<br>(17, 21)          | 3.8<br>(3.5, 4.1)    | -14.5<br>(-23, -5.1)    |
| <b>Ireland</b>                | 190<br>(180, 200)       | 4.8<br>(4.6, 5)      | 393<br>(351, 435)       | 5.7<br>(5.1, 6.3)    | 18.9<br>(4.5, 32.6)     |
| <b>Israel</b>                 | 393<br>(373, 416)       | 8.1<br>(7.7, 8.6)    | 707<br>(651, 774)       | 6.2<br>(5.7, 6.9)    | -23.1<br>(-29.5, -15.8) |
| <b>Italy</b>                  | 17688<br>(17129, 18206) | 20.1<br>(19.5, 20.7) | 11695<br>(10621, 12746) | 8.2<br>(7.4, 9)      | -59.1<br>(-62.8, -55.3) |
| <b>Luxembourg</b>             | 93<br>(89, 99)          | 17.6<br>(16.8, 18.6) | 99<br>(83, 114)         | 10.7<br>(8.9, 12.4)  | -39.3<br>(-49.4, -29)   |
| <b>Malta</b>                  | 35<br>(32, 37)          | 8.1<br>(7.5, 8.6)    | 44<br>(40, 47)          | 5.5<br>(5, 5.9)      | -32.4<br>(-39.3, -24.5) |
| <b>Netherlands</b>            | 1382<br>(1327, 1445)    | 7<br>(6.8, 7.4)      | 1681<br>(1554, 1851)    | 5.1<br>(4.7, 5.6)    | -27.5<br>(-33.1, -21.2) |
| <b>Norway</b>                 | 345<br>(334, 361)       | 5.7<br>(5.5, 5.9)    | 373<br>(341, 397)       | 4.1<br>(3.8, 4.4)    | -27<br>(-34.1, -21.8)   |
| <b>Portugal</b>               | 3541<br>(3438, 3639)    | 26.7<br>(26, 27.5)   | 2133<br>(1940, 2351)    | 10.4<br>(9.4, 11.5)  | -61.1<br>(-65, -57.1)   |
| <b>Spain</b>                  | 10690<br>(10359, 11025) | 20<br>(19.4, 20.6)   | 8132<br>(7510, 8833)    | 8.9<br>(8.1, 9.6)    | -55.7<br>(-59.5, -51.7) |
| <b>Sweden</b>                 | 827<br>(797, 864)       | 6.1<br>(5.9, 6.4)    | 1071<br>(995, 1146)     | 5.6<br>(5.2, 6)      | -8.6<br>(-15, -1.6)     |
| <b>Switzerland</b>            | 806<br>(767, 847)       | 8.2<br>(7.8, 8.6)    | 940<br>(851, 1041)      | 5.8<br>(5.2, 6.5)    | -28.8<br>(-37.1, -19.3) |
| <b>UK</b>                     | 4788<br>(4590, 4875)    | 5.8<br>(5.6, 5.9)    | 9258<br>(9007, 9675)    | 8.7<br>(8.5, 9)      | 48.6<br>(43.6, 58.8)    |
| <b>Southern Latin America</b> | 9586<br>(9335, 9883)    | 20.3<br>(19.7, 20.9) | 12822<br>(11686, 14020) | 15.9<br>(14.5, 17.4) | -21.4<br>(-28.4, -14.1) |
| <b>Argentina</b>              | 5360<br>(5156, 5549)    | 16.4<br>(15.8, 17)   | 7346<br>(6448, 8262)    | 14.1<br>(12.3, 15.9) | -14.1<br>(-25.6, -2.7)  |
| <b>Chile</b>                  | 3718<br>(3578, 3943)    | 34.6<br>(33.3, 36.7) | 4980<br>(4399, 5603)    | 21.5<br>(18.9, 24.1) | -38.1<br>(-45.2, -29.7) |
| <b>Uruguay</b>                | 507<br>(478, 531)       | 13.1<br>(12.4, 13.8) | 495<br>(438, 562)       | 9.4<br>(8.3, 10.8)   | -28.2<br>(-37.1, -18.3) |
| <b>Eastern Europe</b>         | 30564<br>(29058, 31582) | 10.9<br>(10.3, 11.3) | 78289<br>(75809, 80578) | 25.9<br>(25, 26.7)   | 137<br>(129.5, 146.2)   |
| <b>Belarus</b>                | 865<br>(796, 927)       | 6.7<br>(6.1, 7.1)    | 2533<br>(2230, 2816)    | 17.5<br>(15.4, 19.4) | 162.5<br>(122, 198.9)   |

|                               |                         |                      |                         |                      |                         |
|-------------------------------|-------------------------|----------------------|-------------------------|----------------------|-------------------------|
| <b>Estonia</b>                | 140<br>(132, 157)       | 7<br>(6·6, 7·8)      | 292<br>(251, 337)       | 14·4<br>(12·3, 16·7) | 105·8<br>(69·3, 143·2)  |
| <b>Latvia</b>                 | 244<br>(231, 273)       | 6·9<br>(6·5, 7·6)    | 434<br>(385, 491)       | 14<br>(12·3, 15·8)   | 104·1<br>(75·8, 134·4)  |
| <b>Lithuania</b>              | 351<br>(332, 372)       | 7·8<br>(7·4, 8·3)    | 942<br>(872, 1020)      | 21·7<br>(20, 23·5)   | 176·7<br>(154·1, 203·2) |
| <b>Moldova</b>                | 3187<br>(3082, 3290)    | 67·5<br>(65·4, 69·6) | 3094<br>(2914, 3274)    | 55·6<br>(52·3, 58·7) | -17·7<br>(-24, -12·2)   |
| <b>Russia</b>                 | 17451<br>(16015, 18377) | 9·6<br>(8·8, 10·1)   | 50910<br>(49591, 52079) | 24·3<br>(23·7, 24·9) | 152·3<br>(140·3, 176·1) |
| <b>Ukraine</b>                | 8324<br>(8024, 8709)    | 11·9<br>(11·4, 12·4) | 20083<br>(18374, 21669) | 31·7<br>(28·9, 34·3) | 167·2<br>(140·9, 191)   |
| <b>Central Europe</b>         | 30083<br>(29453, 30901) | 20<br>(19·6, 20·6)   | 30986<br>(29825, 32149) | 16·2<br>(15·5, 16·8) | -19·4<br>(-22·7, -15·9) |
| <b>Albania</b>                | 243<br>(203, 263)       | 11<br>(8·8, 12)      | 309<br>(247, 414)       | 7·7<br>(6·1, 10·3)   | -30·5<br>(-46·5, 2·3)   |
| <b>Bosnia and Herzegovina</b> | 744<br>(696, 842)       | 16·6<br>(15·5, 18·3) | 577<br>(499, 808)       | 10<br>(8·6, 13·9)    | -40<br>(-48·1, -22·2)   |
| <b>Bulgaria</b>               | 1867<br>(1792, 1939)    | 14·9<br>(14·4, 15·5) | 2043<br>(1879, 2213)    | 16·4<br>(15, 17·7)   | 9·6<br>(-0·5, 20·2)     |
| <b>Croatia</b>                | 1756<br>(1694, 1829)    | 26·7<br>(25·8, 27·8) | 1095<br>(1008, 1185)    | 13·8<br>(12·7, 14·9) | -48·5<br>(-52·6, -44)   |
| <b>Czech Republic</b>         | 2174<br>(2085, 2304)    | 16·3<br>(15·7, 17·3) | 2175<br>(2016, 2366)    | 12<br>(11·1, 13·1)   | -26·3<br>(-33·4, -18·9) |
| <b>Hungary</b>                | 5941<br>(5786, 6112)    | 42·7<br>(41·6, 43·9) | 3228<br>(2995, 3459)    | 19·1<br>(17·8, 20·5) | -55·2<br>(-58·5, -51·7) |
| <b>Montenegro</b>             | 37<br>(32, 43)          | 5·7<br>(4·8, 6·5)    | 49<br>(41, 58)          | 5·2<br>(4·3, 6·1)    | -9·2<br>(-26·1, 9·2)    |
| <b>North Macedonia</b>        | 152<br>(137, 179)       | 7·8<br>(7, 9)        | 235<br>(196, 266)       | 7·1<br>(6, 8·1)      | -8<br>(-24·4, 7·1)      |
| <b>Poland</b>                 | 4827<br>(4594, 5099)    | 10·8<br>(10·3, 11·4) | 7788<br>(7213, 8462)    | 12·8<br>(11·8, 13·9) | 18·8<br>(6·8, 30·9)     |
| <b>Romania</b>                | 8379<br>(8075, 8658)    | 29·3<br>(28·2, 30·3) | 10114<br>(9419, 10805)  | 30·1<br>(28·1, 32·2) | 2·8<br>(-4·4, 10·4)     |
| <b>Serbia</b>                 | 1520<br>(1216, 1773)    | 12·6<br>(10·2, 14·6) | 1304<br>(1172, 1473)    | 8·9<br>(8, 10)       | -29·8<br>(-41·9, -12·5) |
| <b>Slovakia</b>               | 1654<br>(1477, 2039)    | 28<br>(25, 34·1)     | 1527<br>(1248, 1713)    | 17·9<br>(14·5, 20)   | -36·1<br>(-53·8, -22·6) |
| <b>Slovenia</b>               | 787<br>(757, 820)       | 31·4<br>(30·2, 32·7) | 541<br>(490, 593)       | 14·3<br>(12·9, 15·6) | -54·5<br>(-58·9, -50·1) |
| <b>Central Asia</b>           | 13061<br>(12777, 13479) | 25·9<br>(25·3, 26·7) | 30863<br>(28655, 32907) | 39<br>(36·2, 41·5)   | 50·5<br>(38·6, 59·9)    |
| <b>Armenia</b>                | 413<br>(391, 442)       | 14·8<br>(14, 15·9)   | 1107<br>(1040, 1195)    | 27·3<br>(25·6, 29·5) | 84·7<br>(71·5, 97·7)    |



|                              |                         |                      |                         |                      |                         |
|------------------------------|-------------------------|----------------------|-------------------------|----------------------|-------------------------|
| <b>Azerbaijan</b>            | 1406<br>(1268, 1499)    | 26.8<br>(23.5, 28.5) | 3141<br>(2596, 3726)    | 36.2<br>(28.7, 43.7) | 35.1<br>(13.9, 66)      |
| <b>Georgia</b>               | 1475<br>(1404, 1553)    | 23.5<br>(22.4, 24.7) | 1381<br>(1256, 1553)    | 25.6<br>(23.3, 28.6) | 8.9<br>(-1.3, 21.8)     |
| <b>Kazakhstan</b>            | 2171<br>(2068, 2277)    | 16.2<br>(15.5, 17)   | 6849<br>(5700, 7689)    | 38.6<br>(32.4, 43.2) | 137.6<br>(97.9, 169.9)  |
| <b>Kyrgyzstan</b>            | 1060<br>(1007, 1115)    | 33.3<br>(31.7, 35.1) | 2159<br>(1918, 2336)    | 42.7<br>(38.3, 46)   | 28.3<br>(13.2, 40.2)    |
| <b>Mongolia</b>              | 717<br>(648, 811)       | 62.3<br>(56.4, 69.6) | 1374<br>(1197, 1545)    | 62.3<br>(50, 70.4)   | 0<br>(-21.6, 16.1)      |
| <b>Tajikistan</b>            | 818<br>(752, 980)       | 24.8<br>(22.8, 30.8) | 1536<br>(1369, 1734)    | 25.2<br>(22.4, 29.5) | 1.5<br>(-9.6, 13.6)     |
| <b>Turkmenistan</b>          | 842<br>(804, 871)       | 38.6<br>(36.8, 40)   | 2341<br>(2139, 2548)    | 51.8<br>(47.6, 56.1) | 34<br>(21.3, 47.9)      |
| <b>Uzbekistan</b>            | 4159<br>(4032, 4297)    | 32.6<br>(31.6, 33.8) | 10974<br>(9762, 12331)  | 43.7<br>(39, 48.8)   | 33.9<br>(18.8, 50.3)    |
| <b>Central Latin America</b> | 32018<br>(31379, 32519) | 33.5<br>(32.8, 34.1) | 59053<br>(56628, 62086) | 24.9<br>(23.9, 26.2) | -25.7<br>(-29.3, -21.5) |
| <b>Colombia</b>              | 1953<br>(1857, 2032)    | 10.5<br>(9.9, 10.9)  | 3886<br>(3437, 4420)    | 7.2<br>(6.4, 8.2)    | -31.3<br>(-38.9, -21.8) |
| <b>Costa Rica</b>            | 309<br>(296, 322)       | 16.5<br>(15.9, 17.2) | 840<br>(759, 947)       | 16.9<br>(15.3, 19.1) | 2.4<br>(-7.8, 16.2)     |
| <b>El Salvador</b>           | 914<br>(765, 975)       | 27.5<br>(23.3, 29.3) | 1480<br>(1207, 1925)    | 25.9<br>(21.1, 33.7) | -5.8<br>(-25.1, 32.7)   |
| <b>Guatemala</b>             | 2064<br>(1970, 2146)    | 44.6<br>(42, 46.7)   | 4623<br>(4146, 5142)    | 39.2<br>(35.3, 43.5) | -12<br>(-21.7, 0.1)     |
| <b>Honduras</b>              | 982<br>(832, 1277)      | 38.5<br>(32.4, 50.9) | 2388<br>(1795, 3236)    | 37.8<br>(28, 51.4)   | -2<br>(-23.8, 22.3)     |
| <b>Mexico</b>                | 23104<br>(22664, 23480) | 47.1<br>(46.2, 47.8) | 40509<br>(39068, 42316) | 34.6<br>(33.3, 36.1) | -26.6<br>(-29.8, -22.8) |
| <b>Nicaragua</b>             | 427<br>(387, 467)       | 23.3<br>(20.9, 25.4) | 1127<br>(815, 1306)     | 23.4<br>(17, 27)     | 0.8<br>(-23.1, 17.1)    |
| <b>Panama</b>                | 203<br>(190, 216)       | 13.2<br>(12.3, 14)   | 455<br>(420, 495)       | 11.5<br>(10.6, 12.5) | -12.9<br>(-21.3, -3.4)  |
| <b>Venezuela</b>             | 2062<br>(1975, 2148)    | 19.3<br>(18.4, 20.2) | 3745<br>(3154, 4446)    | 13<br>(11, 15.3)     | -32.7<br>(-43.4, -20)   |
| <b>Andean Latin America</b>  | 6021<br>(5530, 6745)    | 26<br>(24, 29.5)     | 11234<br>(10164, 12321) | 20.7<br>(18.7, 22.7) | -20.3<br>(-30.4, -9.9)  |
| <b>Bolivia</b>               | 1102<br>(801, 1501)     | 31.1<br>(23, 41.3)   | 2215<br>(1727, 2813)    | 25.9<br>(20.3, 32.8) | -16.6<br>(-35.2, 12.5)  |
| <b>Ecuador</b>               | 1421<br>(1367, 1476)    | 23.7<br>(22.8, 24.6) | 3457<br>(3119, 3821)    | 23.6<br>(21.3, 26.1) | -0.4<br>(-10.6, 11.4)   |
| <b>Peru</b>                  | 3498<br>(3169, 3888)    | 25.7<br>(23.2, 28.9) | 5562<br>(4646, 6508)    | 18.1<br>(15.1, 21.1) | -29.7<br>(-42.4, -15.3) |

|                                         |                         |                      |                         |                      |                         |
|-----------------------------------------|-------------------------|----------------------|-------------------------|----------------------|-------------------------|
| <b>Caribbean</b>                        | 5453<br>(4998, 5984)    | 20<br>(18.3, 22)     | 7294<br>(6490, 8619)    | 14.3<br>(12.8, 17)   | -28.4<br>(-35.1, -11.4) |
| <b>Antigua and Barbuda</b>              | 8<br>(8, 9)             | 16.5<br>(15.4, 17.8) | 11<br>(10, 12)          | 11<br>(10.1, 12)     | -33.6<br>(-40.4, -25.1) |
| <b>The Bahamas</b>                      | 38<br>(36, 41)          | 22.5<br>(20.9, 24.1) | 54<br>(48, 60)          | 13.7<br>(12.3, 15.2) | -39.2<br>(-46.6, -31)   |
| <b>Barbados</b>                         | 35<br>(33, 38)          | 12.7<br>(11.8, 13.5) | 39<br>(35, 43)          | 8.3<br>(7.5, 9.3)    | -34.4<br>(-42.1, -25.8) |
| <b>Belize</b>                           | 22<br>(20, 23)          | 21.4<br>(19.3, 23.4) | 57<br>(52, 62)          | 20.4<br>(18.5, 22.2) | -4.5<br>(-13.4, 6.1)    |
| <b>Bermuda</b>                          | 9<br>(8, 10)            | 13.7<br>(12.5, 15.1) | 7<br>(6, 8)             | 5.8<br>(5.2, 6.7)    | -57.8<br>(-63.7, -48.7) |
| <b>Cuba</b>                             | 1110<br>(1059, 1192)    | 10.6<br>(10.1, 11.4) | 1869<br>(1636, 2150)    | 10.3<br>(9, 11.8)    | -2.7<br>(-13.8, 9.7)    |
| <b>Dominica</b>                         | 10<br>(9, 10)           | 13.9<br>(12.9, 14.9) | 10<br>(9, 11)           | 11<br>(10, 12.1)     | -20.7<br>(-29.4, -11.1) |
| <b>Dominican Republic</b>               | 1398<br>(974, 1562)     | 33.8<br>(22.7, 38)   | 1612<br>(1249, 2653)    | 17.5<br>(13.6, 28.4) | -48.3<br>(-62.4, 15.5)  |
| <b>Grenada</b>                          | 15<br>(14, 16)          | 21.3<br>(19.8, 22.8) | 19<br>(17, 20)          | 13<br>(11.9, 14.2)   | -39<br>(-45.1, -32.3)   |
| <b>Guyana</b>                           | 166<br>(158, 174)       | 37.6<br>(35.6, 39.4) | 174<br>(151, 200)       | 26.4<br>(23.1, 30.1) | -29.8<br>(-39.6, -18.5) |
| <b>Haiti</b>                            | 1004<br>(670, 1433)     | 27.8<br>(19.5, 42)   | 1656<br>(1214, 2439)    | 23.5<br>(17.3, 35.5) | -15.6<br>(-34.1, 11.3)  |
| <b>Jamaica</b>                          | 161<br>(148, 174)       | 8.8<br>(8.1, 9.5)    | 192<br>(156, 246)       | 6.6<br>(5.3, 8.4)    | -25.4<br>(-40.5, 1.8)   |
| <b>Puerto Rico</b>                      | 1018<br>(981, 1065)     | 27.7<br>(26.7, 29)   | 953<br>(880, 1031)      | 14.7<br>(13.5, 15.9) | -47<br>(-51.6, -41.7)   |
| <b>Saint Lucia</b>                      | 22<br>(21, 23)          | 24.1<br>(22.6, 25.6) | 28<br>(25, 30)          | 13.1<br>(11.9, 14.3) | -45.6<br>(-51.2, -39)   |
| <b>Saint Vincent and the Grenadines</b> | 12<br>(11, 13)          | 15.9<br>(14.5, 17.2) | 17<br>(15, 19)          | 12.5<br>(11.3, 13.8) | -21.8<br>(-31.5, -9.3)  |
| <b>Suriname</b>                         | 71<br>(65, 76)          | 25.9<br>(23.8, 28)   | 124<br>(108, 139)       | 21<br>(18.5, 23.6)   | -19<br>(-29.4, -7.3)    |
| <b>Trinidad and Tobago</b>              | 149<br>(142, 157)       | 16.5<br>(15.7, 17.4) | 181<br>(148, 223)       | 10.1<br>(8.3, 12.4)  | -38.7<br>(-50.2, -25)   |
| <b>Virgin Islands</b>                   | 20<br>(18, 22)          | 22.1<br>(20.1, 24.6) | 30<br>(25, 35)          | 17.1<br>(14.2, 19.6) | -22.7<br>(-37.5, -9.1)  |
| <b>Tropical Latin America</b>           | 22455<br>(21876, 23020) | 21.6<br>(20.9, 22.1) | 36940<br>(35695, 38039) | 15.5<br>(15, 16)     | -28<br>(-30.9, -25.5)   |
| <b>Brazil</b>                           | 22134<br>(21506, 22717) | 21.8<br>(21.1, 22.3) | 36269<br>(35089, 37363) | 15.6<br>(15.1, 16.1) | -28.3<br>(-31.1, -25.7) |
| <b>Paraguay</b>                         | 321<br>(271, 428)       | 13.6<br>(11.4, 18)   | 671<br>(528, 994)       | 12.3<br>(9.7, 18)    | -9.5<br>(-29.6, 15.4)   |

|                                       |                            |                       |                            |                      |                         |
|---------------------------------------|----------------------------|-----------------------|----------------------------|----------------------|-------------------------|
| <b>East Asia</b>                      | 161530<br>(132157, 174086) | 16.7<br>(13.7, 18)    | 167637<br>(154663, 215370) | 8.3<br>(7.6, 10.7)   | -50.3<br>(-57, -29.4)   |
| <b>China</b>                          | 150718<br>(121900, 162617) | 16.4<br>(13.3, 17.7)  | 153769<br>(140873, 199903) | 8<br>(7.3, 10.4)     | -51.2<br>(-58.2, -29.1) |
| <b>North Korea</b>                    | 2879<br>(2314, 3588)       | 16.5<br>(13.3, 20.4)  | 4657<br>(3534, 5996)       | 14.9<br>(11.4, 19.1) | -9.7<br>(-32.8, 16.7)   |
| <b>Taiwan (province of China)</b>     | 5242<br>(5074, 5415)       | 32.9<br>(31.9, 34.1)  | 6510<br>(6122, 6979)       | 17.6<br>(16.6, 18.9) | -46.4<br>(-50, -42.3)   |
| <b>Southeast Asia</b>                 | 110986<br>(98342, 120206)  | 38.8<br>(34.2, 42.4)  | 176318<br>(164698, 190078) | 29.5<br>(27.7, 31.9) | -23.9<br>(-32.4, -14.1) |
| <b>Cambodia</b>                       | 4237<br>(3312, 5334)       | 83.7<br>(66.9, 103.9) | 9018<br>(7635, 10827)      | 79.4<br>(67.4, 96.1) | -5.1<br>(-24.6, 22.3)   |
| <b>Indonesia</b>                      | 58847<br>(51638, 63855)    | 55.4<br>(47.2, 60.5)  | 82145<br>(76441, 90687)    | 40.6<br>(37.7, 44.2) | -26.7<br>(-35.3, -15)   |
| <b>Laos</b>                           | 877<br>(628, 1139)         | 37.1<br>(27.6, 49.1)  | 1595<br>(1144, 2123)       | 35<br>(25.2, 46.6)   | -5.5<br>(-35.1, 35.8)   |
| <b>Malaysia</b>                       | 1477<br>(1242, 1624)       | 15<br>(12.1, 16.6)    | 3082<br>(2530, 3789)       | 12.1<br>(9.8, 15.1)  | -19<br>(-34.3, -2.3)    |
| <b>Maldives</b>                       | 10<br>(7, 14)              | 11<br>(7.4, 13.9)     | 18<br>(14, 21)             | 6.2<br>(4.9, 7.1)    | -43.8<br>(-59, -8.5)    |
| <b>Mauritius</b>                      | 245<br>(233, 255)          | 29.2<br>(27.9, 30.5)  | 238<br>(217, 263)          | 14.3<br>(13.1, 15.7) | -51.1<br>(-55.9, -45.3) |
| <b>Myanmar</b>                        | 16887<br>(12300, 21520)    | 60.8<br>(44.3, 77.2)  | 23171<br>(19458, 26982)    | 47<br>(40.3, 55)     | -22.8<br>(-41.7, 9.8)   |
| <b>Philippines</b>                    | 3796<br>(3510, 4119)       | 10.5<br>(9.8, 11.3)   | 12696<br>(10889, 14747)    | 17<br>(14.7, 19.5)   | 61.5<br>(38.4, 89.7)    |
| <b>Sri Lanka</b>                      | 3431<br>(2818, 3745)       | 28.4<br>(24.5, 30.7)  | 4021<br>(3278, 4893)       | 16.6<br>(13.6, 20)   | -41.5<br>(-52.4, -28.9) |
| <b>Seychelles</b>                     | 13<br>(12, 16)             | 23.7<br>(21, 27.4)    | 27<br>(24, 30)             | 24.6<br>(21.4, 27.1) | 3.6<br>(-10.6, 22.9)    |
| <b>Thailand</b>                       | 9367<br>(8150, 10560)      | 22.7<br>(19.6, 25.7)  | 17239<br>(13925, 19624)    | 17.6<br>(14.4, 19.9) | -22.5<br>(-35.2, -6.9)  |
| <b>East Timor</b>                     | 86<br>(60, 115)            | 23.1<br>(14.9, 32.1)  | 227<br>(136, 304)          | 28.1<br>(17.1, 37.5) | 21.6<br>(-13.9, 73.9)   |
| <b>Vietnam</b>                        | 11566<br>(9031, 14715)     | 28.1<br>(21.7, 35.9)  | 22607<br>(18553, 27928)    | 24.2<br>(19.9, 29.9) | -13.8<br>(-39.1, 23.1)  |
| <b>Oceania</b>                        | 940<br>(814, 1095)         | 24.5<br>(21.4, 28.2)  | 1735<br>(1444, 2105)       | 20.8<br>(17.8, 24.5) | -15.1<br>(-29.8, 1.5)   |
| <b>American Samoa</b>                 | 4<br>(3, 5)                | 16.1<br>(12.8, 20)    | 6<br>(5, 7)                | 13.4<br>(11.9, 15.3) | -16.8<br>(-34.6, 3.6)   |
| <b>Federated States of Micronesia</b> | 16<br>(12, 24)             | 29.1<br>(22.3, 44.3)  | 14<br>(9, 20)              | 18.9<br>(13, 26.6)   | -35.2<br>(-52.1, -11.4) |
| <b>Fiji</b>                           | 38<br>(31, 45)             | 8.6<br>(6.9, 10.2)    | 66<br>(56, 77)             | 8.7<br>(7.5, 10.1)   | 1.7<br>(-19.5, 29.9)    |

|                                     |                         |                        |                         |                        |                         |
|-------------------------------------|-------------------------|------------------------|-------------------------|------------------------|-------------------------|
| <b>Guam</b>                         | 21<br>(16, 25)          | 23.8<br>(19, 27.9)     | 34<br>(31, 40)          | 19.5<br>(17.3, 22.4)   | -18.2<br>(-33.6, 5.4)   |
| <b>Kiribati</b>                     | 12<br>(9, 17)           | 27.8<br>(20.2, 39.4)   | 18<br>(12, 25)          | 24<br>(15.8, 36.4)     | -13.7<br>(-30.9, 7.3)   |
| <b>Marshall Islands</b>             | 6<br>(4, 8)             | 30.1<br>(21.8, 37)     | 9<br>(6, 12)            | 24.3<br>(16, 32.4)     | -19.4<br>(-36.1, -0.2)  |
| <b>Northern Mariana Islands</b>     | 5<br>(4, 6)             | 22.6<br>(18.7, 27.9)   | 9<br>(8, 10)            | 17.4<br>(15.4, 19.8)   | -23<br>(-40.2, -4.8)    |
| <b>Papua New Guinea</b>             | 667<br>(555, 807)       | 26.5<br>(22.5, 31.7)   | 1307<br>(1030, 1665)    | 21.8<br>(17.4, 26.9)   | -17.6<br>(-34.9, 2.1)   |
| <b>Samoa</b>                        | 19<br>(14, 30)          | 20.7<br>(15.2, 33)     | 23<br>(17, 32)          | 16.5<br>(12.4, 23.1)   | -20.3<br>(-36, -2)      |
| <b>Solomon Islands</b>              | 41<br>(32, 50)          | 23.3<br>(18.4, 28.3)   | 75<br>(61, 89)          | 19.2<br>(16, 22.4)     | -17.6<br>(-34.5, 2.2)   |
| <b>Tonga</b>                        | 15<br>(13, 18)          | 26.8<br>(22.8, 30.9)   | 20<br>(16, 24)          | 24.7<br>(20.3, 29.6)   | -7.9<br>(-25.2, 13.8)   |
| <b>Vanuatu</b>                      | 33<br>(16, 55)          | 39.6<br>(19.1, 66.5)   | 59<br>(29, 107)         | 31.7<br>(15.2, 58.3)   | -20<br>(-39.6, 7.3)     |
| <b>North Africa and Middle East</b> | 48989<br>(37286, 55723) | 29.8<br>(20.1, 34.7)   | 77391<br>(61260, 90640) | 19.3<br>(14.7, 22.6)   | -35.1<br>(-48.8, -20.8) |
| <b>Afghanistan</b>                  | 1453<br>(673, 2151)     | 20.8<br>(10.2, 32.3)   | 2243<br>(1441, 3104)    | 18.6<br>(12.1, 27)     | -10.4<br>(-29.9, 54.5)  |
| <b>Algeria</b>                      | 1614<br>(1168, 2388)    | 12.8<br>(8.8, 19.6)    | 2935<br>(2265, 3750)    | 9.2<br>(7.1, 11.9)     | -28.1<br>(-44.3, -6.7)  |
| <b>Bahrain</b>                      | 38<br>(32, 43)          | 20.9<br>(16.6, 24)     | 84<br>(70, 98)          | 9.4<br>(7.6, 10.7)     | -55.2<br>(-62.7, -45.9) |
| <b>Egypt</b>                        | 29307<br>(20398, 32344) | 133.1<br>(76.4, 150.8) | 44692<br>(32254, 58243) | 103.3<br>(64.4, 133.4) | -22.4<br>(-42.1, -1.5)  |
| <b>Iran</b>                         | 2724<br>(2375, 3057)    | 9.8<br>(8.4, 11.3)     | 5400<br>(4957, 5741)    | 8.1<br>(7.5, 8.7)      | -17.1<br>(-31.2, -2.9)  |
| <b>Iraq</b>                         | 966<br>(783, 1229)      | 11.1<br>(9.1, 14.4)    | 1185<br>(1071, 1330)    | 4.7<br>(4.2, 5.4)      | -58<br>(-65.7, -47.6)   |
| <b>Jordan</b>                       | 195<br>(158, 245)       | 12.7<br>(10.4, 15.8)   | 445<br>(368, 522)       | 8.1<br>(6.5, 9.5)      | -36.5<br>(-51.2, -13.2) |
| <b>Kuwait</b>                       | 54<br>(50, 58)          | 6.7<br>(6.2, 7.3)      | 159<br>(132, 180)       | 6<br>(5.1, 6.7)        | -11.5<br>(-28.8, 2.9)   |
| <b>Lebanon</b>                      | 298<br>(236, 360)       | 13.6<br>(10.9, 16.5)   | 519<br>(367, 664)       | 8.9<br>(6.3, 11.3)     | -34.9<br>(-60.2, -12.1) |
| <b>Libya</b>                        | 309<br>(230, 425)       | 15.6<br>(11.4, 21.8)   | 568<br>(387, 735)       | 12.8<br>(8.8, 16.3)    | -18.2<br>(-41.5, 23.9)  |
| <b>Morocco</b>                      | 2047<br>(1578, 2762)    | 13.9<br>(10.2, 19.6)   | 3298<br>(2729, 3958)    | 11<br>(9.1, 13.3)      | -20.9<br>(-43.1, 8.9)   |
| <b>Palestine</b>                    | 118<br>(87, 153)        | 12.1<br>(9, 15.6)      | 222<br>(198, 248)       | 9.2<br>(8.1, 10.4)     | -24.2<br>(-40, 5)       |

|                                    |                            |                      |                            |                      |                         |
|------------------------------------|----------------------------|----------------------|----------------------------|----------------------|-------------------------|
| <b>Oman</b>                        | 89<br>(69, 111)            | 11.8<br>(8.7, 15.1)  | 176<br>(128, 221)          | 8.6<br>(6.5, 10.5)   | -27.2<br>(-47.8, -3.7)  |
| <b>Qatar</b>                       | 27<br>(22, 32)             | 23.5<br>(18.7, 28.1) | 114<br>(84, 141)           | 13.5<br>(10.4, 16.4) | -42.6<br>(-55.2, -25.9) |
| <b>Saudi Arabia</b>                | 1575<br>(742, 2146)        | 26.4<br>(10.5, 36.5) | 2461<br>(1573, 3151)       | 18.4<br>(10.3, 23.5) | -30.1<br>(-51.8, 9.8)   |
| <b>Sudan</b>                       | 2248<br>(1365, 3476)       | 23.5<br>(12.5, 39.2) | 3148<br>(2006, 4612)       | 17.2<br>(9.9, 26.4)  | -26.9<br>(-47.5, 9.1)   |
| <b>Syria</b>                       | 846<br>(717, 973)          | 14.6<br>(12.6, 16.7) | 1525<br>(1256, 1841)       | 12.3<br>(10.3, 14.7) | -15.7<br>(-33.8, 7.2)   |
| <b>Tunisia</b>                     | 548<br>(405, 723)          | 11.4<br>(8.3, 15.4)  | 1001<br>(776, 1269)        | 8.8<br>(6.9, 11.1)   | -23<br>(-46.8, 7.5)     |
| <b>Turkey</b>                      | 3404<br>(2386, 4533)       | 9.2<br>(6.6, 12.4)   | 5024<br>(4374, 5705)       | 5.8<br>(5.1, 6.6)    | -36.8<br>(-56.2, -9)    |
| <b>United Arab Emirates</b>        | 76<br>(32, 111)            | 15.1<br>(5.8, 22.7)  | 413<br>(202, 561)          | 10.7<br>(4.8, 14.5)  | -29<br>(-52.4, 9.4)     |
| <b>Yemen</b>                       | 1021<br>(551, 1632)        | 19.2<br>(9.5, 32.7)  | 1708<br>(1228, 2400)       | 13.1<br>(9, 18.9)    | -31.8<br>(-56, 16.7)    |
| <b>South Asia</b>                  | 159399<br>(143501, 184962) | 23<br>(21, 25.6)     | 295615<br>(268243, 378263) | 21<br>(19, 27.1)     | -8.7<br>(-18.9, 8.6)    |
| <b>Bangladesh</b>                  | 22245<br>(17520, 25700)    | 34.1<br>(25.5, 39.4) | 26390<br>(22510, 31671)    | 21.3<br>(18.3, 25.7) | -37.6<br>(-50.5, -7.5)  |
| <b>Bhutan</b>                      | 107<br>(87, 131)           | 35<br>(28.2, 43.5)   | 157<br>(111, 211)          | 23.6<br>(17, 31.7)   | -32.5<br>(-52, -5.6)    |
| <b>India</b>                       | 110091<br>(94539, 141189)  | 19.6<br>(16.9, 24.5) | 217896<br>(192942, 299365) | 19.1<br>(16.8, 26.5) | -2.6<br>(-14.8, 13.1)   |
| <b>Nepal</b>                       | 3139<br>(2408, 4059)       | 27.2<br>(20.7, 35.6) | 5671<br>(4188, 7405)       | 25.5<br>(19, 33.1)   | -6.3<br>(-31, 24.4)     |
| <b>Pakistan</b>                    | 23817<br>(16501, 29930)    | 37.3<br>(24.1, 48.4) | 45501<br>(33840, 57211)    | 37.2<br>(26.8, 47)   | -0.3<br>(-20.6, 29.1)   |
| <b>Southern sub-Saharan Africa</b> | 5789<br>(4628, 6513)       | 18.6<br>(14.3, 21.3) | 6784<br>(5629, 7912)       | 11.6<br>(9.7, 13.5)  | -37.6<br>(-51.4, -18.2) |
| <b>Botswana</b>                    | 118<br>(77, 169)           | 18.2<br>(12.1, 25.7) | 187<br>(141, 262)          | 12.9<br>(10, 17.8)   | -29.2<br>(-47.3, -5.6)  |
| <b>eSwatini</b>                    | 104<br>(76, 140)           | 30<br>(22.2, 41.1)   | 127<br>(96, 170)           | 20<br>(15.2, 26.7)   | -33.3<br>(-52.9, -7.2)  |
| <b>Lesotho</b>                     | 183<br>(79, 281)           | 17.2<br>(7.3, 26.4)  | 209<br>(96, 318)           | 16.3<br>(7.4, 24.4)  | -5.2<br>(-36.4, 48.6)   |
| <b>Namibia</b>                     | 94<br>(46, 139)            | 12.3<br>(6, 18.2)    | 217<br>(131, 330)          | 14.3<br>(8.7, 21.7)  | 16.4<br>(-24.9, 72.2)   |
| <b>South Africa</b>                | 4168<br>(3235, 4843)       | 17.5<br>(13, 20.7)   | 4605<br>(4125, 5095)       | 10<br>(9, 11.1)      | -42.7<br>(-50.7, -25)   |
| <b>Zimbabwe</b>                    | 1123<br>(928, 1310)        | 25.4<br>(21, 29.6)   | 1440<br>(453, 2504)        | 20<br>(6.2, 34.5)    | -21.3<br>(-76.7, 38.4)  |

|                                   |                         |                       |                          |                      |                         |
|-----------------------------------|-------------------------|-----------------------|--------------------------|----------------------|-------------------------|
| <b>Western sub-Saharan Africa</b> | 53268<br>(33630, 75518) | 54.6<br>(33.2, 78.3)  | 72598<br>(48859, 101647) | 35.8<br>(23.9, 49.9) | -34.5<br>(-50.8, -13.6) |
| <b>Benin</b>                      | 899<br>(628, 1289)      | 39.8<br>(27.2, 58.3)  | 1269<br>(901, 1740)      | 24.1<br>(16.9, 32.9) | -39.6<br>(-68.3, -8.4)  |
| <b>Burkina Faso</b>               | 1847<br>(1497, 2150)    | 40.5<br>(32.8, 47.2)  | 2090<br>(199, 3727)      | 21.9<br>(1.7, 39.2)  | -46<br>(-96.1, 2.6)     |
| <b>Cameroon</b>                   | 2451<br>(1891, 2948)    | 49.3<br>(37.8, 59.5)  | 4080<br>(1862, 6075)     | 31.5<br>(14, 47.7)   | -36.1<br>(-65.8, -8.6)  |
| <b>Cape Verde</b>                 | 37<br>(29, 46)          | 16.4<br>(12.9, 20.3)  | 86<br>(76, 100)          | 18.4<br>(16.1, 21.4) | 12.3<br>(-14.8, 49.3)   |
| <b>Chad</b>                       | 1024<br>(663, 1416)     | 32.8<br>(20.7, 45.8)  | 2040<br>(1545, 2597)     | 32.1<br>(23.9, 41.8) | -2.1<br>(-26.4, 40.7)   |
| <b>Côte d'Ivoire</b>              | 1972<br>(1467, 2654)    | 40.1<br>(29.5, 55.2)  | 3511<br>(2670, 4553)     | 29.1<br>(22.2, 38.4) | -27.5<br>(-51.9, -3.3)  |
| <b>The Gambia</b>                 | 132<br>(80, 195)        | 31.9<br>(19, 46.7)    | 284<br>(205, 366)        | 27.7<br>(20.1, 35.3) | -13.3<br>(-40, 32.5)    |
| <b>Ghana</b>                      | 2749<br>(2237, 3393)    | 38.7<br>(31.2, 47.6)  | 4004<br>(1347, 7070)     | 24<br>(7.7, 42.6)    | -38<br>(-82.2, 6.2)     |
| <b>Guinea</b>                     | 1370<br>(869, 2277)     | 38<br>(23.2, 64.3)    | 1689<br>(1077, 2658)     | 28.9<br>(18.2, 46)   | -24<br>(-43.2, 13)      |
| <b>Guinea-Bissau</b>              | 211<br>(139, 288)       | 45.9<br>(30.5, 61)    | 290<br>(220, 392)        | 35.3<br>(27.2, 47.6) | -23.1<br>(-42.1, 9.9)   |
| <b>Liberia</b>                    | 651<br>(468, 880)       | 54.2<br>(38, 75.4)    | 733<br>(537, 980)        | 33.4<br>(24.2, 44.7) | -38.3<br>(-53.1, -20.7) |
| <b>Mali</b>                       | 1826<br>(1201, 2808)    | 41.6<br>(26.2, 66.2)  | 1784<br>(695, 3024)      | 18.7<br>(6.7, 32.4)  | -55.1<br>(-88.2, -20)   |
| <b>Mauritania</b>                 | 372<br>(276, 504)       | 33.9<br>(25.3, 46.8)  | 426<br>(301, 574)        | 20.1<br>(14.4, 27)   | -40.6<br>(-53.9, -24.6) |
| <b>Niger</b>                      | 1068<br>(764, 1613)     | 30.7<br>(21.8, 48)    | 1504<br>(417, 2560)      | 17.4<br>(4.4, 30.2)  | -43.2<br>(-81.3, -13.7) |
| <b>Nigeria</b>                    | 33926<br>(16623, 54146) | 69.2<br>(32.9, 110.3) | 45474<br>(19958, 76700)  | 47.9<br>(20.7, 81.4) | -30.7<br>(-50.3, -0.1)  |
| <b>São Tomé and Príncipe</b>      | 51<br>(34, 64)          | 70.2<br>(46.2, 88.6)  | 79<br>(61, 110)          | 69.3<br>(52.7, 94.6) | -1.2<br>(-35.2, 45.5)   |
| <b>Senegal</b>                    | 981<br>(624, 1359)      | 26.8<br>(16.5, 37.6)  | 1421<br>(590, 2146)      | 18.1<br>(7.2, 27.2)  | -32.4<br>(-59, -12.4)   |
| <b>Sierra Leone</b>               | 1103<br>(753, 1635)     | 52<br>(35, 78.2)      | 1086<br>(434, 1577)      | 28.1<br>(10.7, 41.4) | -46<br>(-86.1, 2.1)     |
| <b>Togo</b>                       | 597<br>(454, 785)       | 40.4<br>(30.2, 53.9)  | 747<br>(249, 1155)       | 19.1<br>(6.1, 29.3)  | -52.8<br>(-87.9, -16.6) |
| <b>Eastern sub-Saharan Africa</b> | 38733<br>(32173, 46352) | 48.6<br>(41.7, 56.9)  | 57847<br>(44087, 69973)  | 34.8<br>(26.4, 42.2) | -28.3<br>(-47.4, -4.1)  |
| <b>Burundi</b>                    | 1671<br>(1087, 2470)    | 71.1<br>(47.5, 103.5) | 1719<br>(526, 2766)      | 38.9<br>(11.2, 62.8) | -45.3<br>(-85.1, -10.3) |

|                                   |                        |                       |                         |                      |                         |
|-----------------------------------|------------------------|-----------------------|-------------------------|----------------------|-------------------------|
| <b>Comoros</b>                    | 47<br>(7, 82)          | 21.4<br>(2.8, 37.6)   | 88<br>(18, 138)         | 19.2<br>(3.8, 30.3)  | -10.1<br>(-30.3, 41.9)  |
| <b>Djibouti</b>                   | 46<br>(30, 67)         | 27.1<br>(18, 39.2)    | 143<br>(90, 207)        | 24.7<br>(15.3, 35.9) | -9<br>(-37.3, 29.9)     |
| <b>Eritrea</b>                    | 519<br>(318, 839)      | 48.6<br>(32.2, 75.6)  | 1112<br>(851, 1439)     | 44<br>(34, 55.8)     | -9.3<br>(-36.4, 41.3)   |
| <b>Ethiopia</b>                   | 10886<br>(6858, 16649) | 53.1<br>(35.1, 76.9)  | 16069<br>(13632, 19052) | 38.6<br>(33.2, 45.8) | -27.3<br>(-51.3, 20.8)  |
| <b>Kenya</b>                      | 5273<br>(3388, 7468)   | 59.7<br>(38.7, 84.4)  | 10398<br>(6919, 14461)  | 47.1<br>(31.9, 65.5) | -21.1<br>(-52.1, 3.5)   |
| <b>Madagascar</b>                 | 2050<br>(1466, 3060)   | 36.3<br>(26.1, 53.6)  | 2939<br>(2123, 3717)    | 26.2<br>(18.9, 33.1) | -27.9<br>(-60.3, 13.2)  |
| <b>Malawi</b>                     | 2328<br>(1358, 2968)   | 54.6<br>(35.5, 68)    | 2640<br>(545, 4156)     | 33.1<br>(6.6, 51.9)  | -39.4<br>(-88.8, 19.7)  |
| <b>Mozambique</b>                 | 1933<br>(1285, 2586)   | 29.6<br>(19.7, 39.6)  | 2380<br>(413, 3843)     | 19.9<br>(3.3, 31.9)  | -32.9<br>(-89.6, 36.3)  |
| <b>Rwanda</b>                     | 2716<br>(2141, 3229)   | 88.1<br>(71.9, 104.8) | 2668<br>(1696, 3707)    | 44.9<br>(28.5, 61.7) | -49<br>(-69.8, -25.3)   |
| <b>Somalia</b>                    | 961<br>(447, 1681)     | 34.6<br>(18.6, 57.5)  | 2522<br>(1562, 3755)    | 37.8<br>(23.8, 56.3) | 9.3<br>(-24.2, 73.1)    |
| <b>South Sudan</b>                | 836<br>(459, 1389)     | 33.6<br>(20.4, 53.2)  | 1397<br>(935, 2026)     | 34.9<br>(23.7, 49.8) | 3.7<br>(-27.4, 60.2)    |
| <b>Tanzania</b>                   | 4542<br>(3346, 5819)   | 39.4<br>(30.1, 49.8)  | 6161<br>(2520, 9250)    | 24.4<br>(9.5, 37.2)  | -38.3<br>(-76.2, -2.3)  |
| <b>Uganda</b>                     | 2724<br>(1699, 3870)   | 39<br>(24.2, 56)      | 4316<br>(1714, 6471)    | 29.4<br>(11.1, 43.9) | -24.8<br>(-58.8, 6.1)   |
| <b>Zambia</b>                     | 2182<br>(1683, 2609)   | 69.9<br>(55.4, 83.3)  | 3257<br>(2724, 3832)    | 47.3<br>(39.8, 55.9) | -32.3<br>(-46.9, -14.2) |
| <b>Central sub-Saharan Africa</b> | 10419<br>(7738, 14093) | 40.1<br>(29.1, 55.1)  | 20330<br>(15739, 26353) | 34.3<br>(25.9, 45.2) | -14.5<br>(-29.6, 6.3)   |
| <b>Angola</b>                     | 2102<br>(1154, 3386)   | 46.2<br>(24.6, 77)    | 5294<br>(3920, 7402)    | 42.9<br>(31.1, 62.8) | -7.2<br>(-35.7, 51.9)   |
| <b>Central African Republic</b>   | 538<br>(303, 773)      | 38.3<br>(21.4, 54)    | 699<br>(298, 1143)      | 27.4<br>(11.4, 43.7) | -28.6<br>(-51.5, -5.8)  |
| <b>Congo</b>                      | 589<br>(405, 903)      | 48.2<br>(32.7, 73.8)  | 1014<br>(653, 1475)     | 36.7<br>(23.4, 54.8) | -23.9<br>(-42.4, 3.2)   |
| <b>DR Congo</b>                   | 6771<br>(4985, 9242)   | 37.5<br>(27.1, 51.5)  | 12753<br>(9386, 17189)  | 31.8<br>(23.2, 43.6) | -15.2<br>(-34.7, 7.9)   |
| <b>Equatorial Guinea</b>          | 78<br>(24, 135)        | 34.4<br>(10.4, 58.1)  | 149<br>(82, 242)        | 27.1<br>(14.5, 43.7) | -21.2<br>(-50.3, 67)    |
| <b>Gabon</b>                      | 341<br>(234, 477)      | 57<br>(38.8, 82.4)    | 421<br>(280, 618)       | 37.8<br>(24.7, 56.6) | -33.7<br>(-47.8, -16)   |

**Appendix Table 4: DALYs and age-standardised DALY rates due to cirrhosis in 1990 and 2017 for both sexes and percentage change of age-standardised rates per 100 000 by location. DALYs=disability-adjusted life-years.**

|                                  | 1990                             |                         | 2017                             |                         | Percentage change in age-standardised rates between 1990 and 2017 |
|----------------------------------|----------------------------------|-------------------------|----------------------------------|-------------------------|-------------------------------------------------------------------|
|                                  | Counts (95% UI)                  | Rate (95% UI)           | Counts (95% UI)                  | Rate (95% UI)           |                                                                   |
| <b>Global</b>                    | 30523343<br>(28633671, 32178401) | 656.4<br>(612.8, 689.2) | 41397988<br>(39550486, 45145938) | 510.7<br>(487.6, 557.1) | -22.2<br>(-27.6, -15)                                             |
| <b>High-income North America</b> | 1127267<br>(1093235, 1157333)    | 351.1<br>(340.3, 360.4) | 1842408<br>(1775953, 1911748)    | 352<br>(338.8, 366.1)   | 0.3<br>(-3.5, 5.1)                                                |
| <b>Canada</b>                    | 77802<br>(74920, 80634)          | 245.4<br>(236.4, 254.4) | 119651<br>(110413, 129273)       | 208.8<br>(192.9, 225.9) | -14.9<br>(-21.5, -8.1)                                            |
| <b>Greenland</b>                 | 170<br>(147, 197)                | 326.4<br>(281.2, 384)   | 228<br>(173, 263)                | 302.3<br>(227.5, 347.8) | -7.4<br>(-33.9, 18.2)                                             |
| <b>USA</b>                       | 1049270<br>(1016853, 1077423)    | 363<br>(351.7, 372.7)   | 1722496<br>(1658806, 1790382)    | 368.9<br>(354.7, 384.4) | 1.6<br>(-2.5, 6.9)                                                |
| <b>Australasia</b>               | 43213<br>(41372, 44733)          | 190.7<br>(182.4, 197.8) | 62493<br>(56287, 69582)          | 153.9<br>(138.3, 171.3) | -19.3<br>(-27.6, -9.8)                                            |
| <b>Australia</b>                 | 38098<br>(36289, 39569)          | 201.3<br>(191.6, 209.4) | 55561<br>(49461, 62660)          | 163.1<br>(145.3, 184)   | -19<br>(-27.9, -8.1)                                              |
| <b>New Zealand</b>               | 5115<br>(4830, 5459)             | 136.1<br>(128.5, 145.2) | 6932<br>(6415, 7541)             | 105.2<br>(97.1, 114.4)  | -22.7<br>(-28.9, -16.3)                                           |
| <b>High-income Asia Pacific</b>  | 1151538<br>(1115870, 1192803)    | 554.5<br>(537, 575)     | 835992<br>(758394, 906687)       | 259.6<br>(233.5, 284.1) | -53.2<br>(-57.2, -49.7)                                           |
| <b>Brunei</b>                    | 546<br>(422, 629)                | 354.8<br>(294.5, 405.5) | 975<br>(851, 1124)               | 229.3<br>(201.8, 273.2) | -35.4<br>(-46.6, -15.7)                                           |
| <b>Japan</b>                     | 613874<br>(590334, 640533)       | 360.6<br>(345.5, 377.7) | 539871<br>(491918, 583922)       | 224.2<br>(203.4, 244.9) | -37.8<br>(-42.1, -34.3)                                           |
| <b>Singapore</b>                 | 6289<br>(5912, 6684)             | 229.8<br>(216.3, 243.9) | 8564<br>(7574, 9738)             | 121.4<br>(107.3, 138.5) | -47.2<br>(-52.5, -41.9)                                           |
| <b>South Korea</b>               | 530829<br>(512951, 552031)       | 1358<br>(1313, 1410.6)  | 286583<br>(248738, 323323)       | 346<br>(300.3, 389.6)   | -74.5<br>(-77.9, -71.2)                                           |
| <b>Western Europe</b>            | 2183224<br>(2133625, 2236055)    | 432.1<br>(422.1, 443)   | 1840821<br>(1740698, 1948972)    | 266.2<br>(250.6, 283.4) | -38.4<br>(-41.8, -35)                                             |
| <b>Andorra</b>                   | 195<br>(147, 243)                | 319.1<br>(241.6, 398.1) | 303<br>(229, 383)                | 240.7<br>(181.9, 303.2) | -24.6<br>(-43.4, -1.5)                                            |
| <b>Austria</b>                   | 65949<br>(63793, 68404)          | 661.4<br>(639.5, 686.9) | 48925<br>(44939, 52841)          | 346<br>(317, 374.5)     | -47.7<br>(-52, -43)                                               |
| <b>Belgium</b>                   | 44365<br>(42725, 46007)          | 334.7<br>(322.6, 346.8) | 49938<br>(45540, 54372)          | 281.5<br>(256.2, 307)   | -15.9<br>(-23.1, -8.8)                                            |
| <b>Cyprus</b>                    | 2136<br>(1685, 2665)             | 258.2<br>(204.1, 323)   | 2954<br>(2598, 3413)             | 168.2<br>(147.8, 195.6) | -34.8<br>(-48.5, -14.7)                                           |
| <b>Denmark</b>                   | 23648<br>(22555, 24763)          | 363.8<br>(346.7, 381.2) | 25917<br>(23795, 28223)          | 290.8<br>(266.1, 317.5) | -20.1<br>(-27.6, -11.2)                                           |
| <b>Finland</b>                   | 18611<br>(17592, 19678)          | 291.7<br>(275.6, 309.3) | 34697<br>(31735, 37782)          | 416<br>(379.4, 455.4)   | 42.6<br>(26.7, 58.6)                                              |
| <b>France</b>                    | 360515<br>(349196, 373585)       | 504.2<br>(488.1, 521.8) | 270000<br>(241744, 296972)       | 269.3<br>(239.4, 298.3) | -46.6<br>(-52.4, -41.2)                                           |
| <b>Germany</b>                   | 581924<br>(561819, 601094)       | 532.5<br>(515.2, 550)   | 495800<br>(442312, 555573)       | 353.7<br>(316.4, 396.3) | -33.6<br>(-40.6, -25.4)                                           |
| <b>Greece</b>                    | 35527<br>(33803, 37175)          | 246.2<br>(234.1, 257.5) | 30483<br>(28067, 33211)          | 173.4<br>(159.1, 189.9) | -29.6<br>(-35.4, -23.3)                                           |
| <b>Iceland</b>                   | 362<br>(335, 388)                | 137.8<br>(127.7, 148.4) | 593<br>(531, 655)                | 129.8<br>(115.8, 144.1) | -5.9<br>(-15.2, 4.4)                                              |
| <b>Ireland</b>                   | 5243<br>(4949, 5557)             | 138.1<br>(130, 146.9)   | 11662<br>(10323, 12973)          | 180.7<br>(159.3, 201.2) | 30.8<br>(15.1, 45.3)                                              |
| <b>Israel</b>                    | 9693<br>(9130, 10335)            | 201.5<br>(189.5, 214.6) | 16372<br>(14799, 18052)          | 160.3<br>(144.1, 178)   | -20.5<br>(-26.7, -13.1)                                           |
| <b>Italy</b>                     | 433796<br>(420301, 448387)       | 534.6<br>(517, 552.9)   | 246753<br>(223204, 270531)       | 221.2<br>(198.2, 243.3) | -58.6<br>(-62.5, -54.8)                                           |



|                               |                             |                            |                               |                            |                         |
|-------------------------------|-----------------------------|----------------------------|-------------------------------|----------------------------|-------------------------|
| <b>Luxembourg</b>             | 2643<br>(2497, 2792)        | 521.9<br>(492.1, 551)      | 2730<br>(2279, 3160)          | 317.4<br>(264.4, 368.5)    | -39.2<br>(-49.2, -30.1) |
| <b>Malta</b>                  | 971<br>(898, 1036)          | 224.8<br>(208.2, 240)      | 1131<br>(1037, 1233)          | 163.4<br>(149.8, 178.2)    | -27.3<br>(-34.6, -18.8) |
| <b>Netherlands</b>            | 33561<br>(32053, 35126)     | 181.8<br>(173.5, 190.4)    | 38452<br>(35081, 41938)       | 137.7<br>(125.1, 150.1)    | -24.3<br>(-30.2, -18)   |
| <b>Norway</b>                 | 9085<br>(8704, 9483)        | 170.6<br>(163.4, 178.3)    | 9701<br>(8733, 10578)         | 125.5<br>(112.4, 138)      | -26.4<br>(-33.5, -21.3) |
| <b>Portugal</b>               | 99616<br>(96590, 102494)    | 792.1<br>(768.6, 814.6)    | 54457<br>(48991, 60061)       | 310<br>(277.8, 344.8)      | -60.9<br>(-65.1, -56.6) |
| <b>Spain</b>                  | 274774<br>(266235, 284122)  | 551.3<br>(534, 570.4)      | 187474<br>(172959, 203480)    | 243<br>(223.3, 264.7)      | -55.9<br>(-59.5, -51.8) |
| <b>Sweden</b>                 | 21437<br>(20522, 22406)     | 182<br>(174, 190.7)        | 25488<br>(23507, 27440)       | 160.1<br>(146.9, 173.4)    | -12<br>(-18.4, -5.6)    |
| <b>Switzerland</b>            | 22210<br>(21057, 23352)     | 242.8<br>(230, 255.3)      | 22917<br>(20297, 25456)       | 164.7<br>(144.6, 184)      | -32.2<br>(-40.5, -24.2) |
| <b>UK</b>                     | 134858<br>(129733, 139678)  | 183.6<br>(176.7, 190.6)    | 262166<br>(252972, 272312)    | 278.2<br>(268.2, 289.5)    | 51.5<br>(47.5, 58.7)    |
| <b>Southern Latin America</b> | 287279<br>(279358, 297167)  | 601.7<br>(585, 622.5)      | 342023<br>(312479, 374971)    | 442.5<br>(404.7, 485.4)    | -26.5<br>(-32.8, -19.4) |
| <b>Argentina</b>              | 157403<br>(151726, 163011)  | 478.5<br>(461.1, 495.6)    | 196571<br>(172705, 223692)    | 393.8<br>(346, 449.6)      | -17.7<br>(-28.1, -6.5)  |
| <b>Chile</b>                  | 116591<br>(111721, 123850)  | 1040.1<br>(996.6, 1104.1)  | 133587<br>(117416, 150410)    | 584.5<br>(513.7, 659.3)    | -43.8<br>(-50.4, -35.8) |
| <b>Uruguay</b>                | 13273<br>(12605, 13860)     | 362.6<br>(344.8, 379.1)    | 11850<br>(10544, 13535)       | 258.4<br>(229.4, 295.1)    | -28.7<br>(-37.3, -19.3) |
| <b>Eastern Europe</b>         | 961173<br>(904792, 1001426) | 351.9<br>(330, 367.7)      | 2729903<br>(2617994, 2833616) | 967.1<br>(925.1, 1006.3)   | 174.8<br>(165.8, 185.5) |
| <b>Belarus</b>                | 26656<br>(24191, 28588)     | 212.4<br>(192, 228.3)      | 83810<br>(73119, 93620)       | 622.9<br>(541.8, 698.3)    | 193.3<br>(148.7, 234)   |
| <b>Estonia</b>                | 4782<br>(4473, 5154)        | 250.3<br>(233.3, 270)      | 9569<br>(8244, 11075)         | 522.7<br>(444.9, 606.7)    | 108.9<br>(74.4, 144.6)  |
| <b>Latvia</b>                 | 7835<br>(7345, 8359)        | 230.7<br>(215.7, 246.5)    | 14008<br>(12291, 15765)       | 508.7<br>(444.7, 576.9)    | 120.5<br>(91.4, 153.5)  |
| <b>Lithuania</b>              | 12059<br>(11373, 12773)     | 278.1<br>(262.4, 295.3)    | 31650<br>(29223, 34187)       | 805.4<br>(742, 873.1)      | 189.6<br>(166.7, 217.2) |
| <b>Moldova</b>                | 96120<br>(92922, 99751)     | 2014.2<br>(1946.4, 2089)   | 91041<br>(85316, 96339)       | 1694.4<br>(1583.7, 1792.7) | -15.9<br>(-22.8, -10)   |
| <b>Russia</b>                 | 549721<br>(497352, 583440)  | 307.6<br>(276.9, 327.3)    | 1753143<br>(1705696, 1802317) | 893.5<br>(868, 919.9)      | 190.4<br>(176.5, 217.9) |
| <b>Ukraine</b>                | 263999<br>(252539, 275223)  | 395.6<br>(378.5, 412.9)    | 746681<br>(678703, 808440)    | 1262.5<br>(1141.1, 1370.7) | 219.1<br>(185.1, 248.6) |
| <b>Central Europe</b>         | 943631<br>(919953, 973769)  | 642.1<br>(625.6, 662.9)    | 910197<br>(871665, 951307)    | 520.1<br>(496.6, 544.2)    | -19<br>(-22.6, -15.4)   |
| <b>Albania</b>                | 7472<br>(6873, 8173)        | 298.9<br>(273.9, 324.2)    | 8657<br>(6971, 11720)         | 232.3<br>(186.4, 315.7)    | -22.3<br>(-37.7, 4.3)   |
| <b>Bosnia and Herzegovina</b> | 24078<br>(22433, 27886)     | 505.7<br>(472.8, 576.6)    | 16608<br>(14420, 22599)       | 307<br>(266.9, 416.3)      | -39.3<br>(-46.6, -25.4) |
| <b>Bulgaria</b>               | 56347<br>(53953, 58632)     | 472.2<br>(451.6, 491.5)    | 60350<br>(55352, 65443)       | 545.7<br>(499, 592.8)      | 15.6<br>(5.4, 26.3)     |
| <b>Croatia</b>                | 54241<br>(52267, 56362)     | 840.2<br>(809, 872.8)      | 29237<br>(27066, 31576)       | 410.2<br>(379.5, 445.3)    | -51.2<br>(-54.8, -46.9) |
| <b>Czech Republic</b>         | 67616<br>(64798, 71383)     | 529.5<br>(507.2, 559)      | 64483<br>(59454, 69941)       | 393<br>(361.1, 428)        | -25.8<br>(-33.1, -18.1) |
| <b>Hungary</b>                | 200575<br>(194990, 206401)  | 1510.7<br>(1468.7, 1555.6) | 93669<br>(86836, 100554)      | 603.2<br>(558.9, 649.3)    | -60.1<br>(-62.9, -56.9) |
| <b>Montenegro</b>             | 1346<br>(1182, 1525)        | 202.4<br>(178, 228.9)      | 1691<br>(1444, 2011)          | 191.4<br>(163.1, 226.6)    | -5.4<br>(-20.3, 12.3)   |
| <b>North Macedonia</b>        | 5142<br>(4698, 5986)        | 249.7<br>(228.3, 288.7)    | 7438<br>(6385, 8405)          | 239.9<br>(205.4, 270.8)    | -3.9<br>(-20.1, 10.5)   |
| <b>Poland</b>                 | 146019<br>(138029, 155056)  | 330.7<br>(312.4, 350.8)    | 251185<br>(231362, 272517)    | 450.2<br>(413.8, 488.7)    | 36.2<br>(22.9, 49.2)    |

|                              |                               |                            |                               |                            |                         |
|------------------------------|-------------------------------|----------------------------|-------------------------------|----------------------------|-------------------------|
| <b>Romania</b>               | 253977<br>(244178, 263455)    | 907·3<br>(871·4, 940·9)    | 276609<br>(258723, 296176)    | 907·3<br>(847·8, 974)      | 0<br>(-7·3, 7·9)        |
| <b>Serbia</b>                | 47616<br>(39029, 54996)       | 397·9<br>(328·1, 455·4)    | 36680<br>(33004, 42014)       | 274·1<br>(245·8, 316·4)    | -31·1<br>(-42·3, -16·7) |
| <b>Slovakia</b>              | 54426<br>(48805, 64424)       | 937·5<br>(841·7, 1103·8)   | 48598<br>(38674, 54419)       | 603·7<br>(479·9, 675·9)    | -35·6<br>(-52·5, -23·1) |
| <b>Slovenia</b>              | 24776<br>(23673, 25860)       | 1003·1<br>(958·2, 1047·3)  | 14992<br>(13575, 16305)       | 436·9<br>(394·9, 476·4)    | -56·4<br>(-60·5, -52·5) |
| <b>Central Asia</b>          | 431614<br>(421034, 448982)    | 776·3<br>(757·6, 807·3)    | 1048825<br>(967341, 1120738)  | 1197·1<br>(1107·7, 1275·3) | 54·2<br>(40·8, 65·1)    |
| <b>Armenia</b>               | 12517<br>(11850, 13283)       | 409·8<br>(388·6, 434·4)    | 24506<br>(23001, 26132)       | 623<br>(586·9, 661·7)      | 52<br>(41·4, 62·5)      |
| <b>Azerbaijan</b>            | 42119<br>(39012, 46710)       | 720·2<br>(669·7, 790·4)    | 89166<br>(75779, 104015)      | 881·6<br>(751, 1027·7)     | 22·4<br>(3·6, 45·9)     |
| <b>Georgia</b>               | 43456<br>(41186, 45828)       | 691<br>(654·2, 729·6)      | 40367<br>(36807, 44677)       | 810·7<br>(737·8, 892·5)    | 17·3<br>(5·7, 30·4)     |
| <b>Kazakhstan</b>            | 66676<br>(63410, 69707)       | 459·6<br>(438·2, 479·8)    | 225144<br>(184597, 255052)    | 1196·7<br>(984·6, 1351·3)  | 160·4<br>(112·3, 196·7) |
| <b>Kyrgyzstan</b>            | 34698<br>(32908, 36581)       | 1018·1<br>(964·5, 1075·1)  | 76824<br>(67649, 83813)       | 1386·6<br>(1232·1, 1506)   | 36·2<br>(18·5, 50·3)    |
| <b>Mongolia</b>              | 24463<br>(21757, 27613)       | 1764<br>(1574·2, 2051·7)   | 44389<br>(37999, 52174)       | 1583·6<br>(1379·9, 1782·4) | -10·2<br>(-21·8, 3·6)   |
| <b>Tajikistan</b>            | 31991<br>(29027, 35899)       | 798·9<br>(732·5, 958·3)    | 60412<br>(53661, 67190)       | 816·8<br>(729·3, 911·1)    | 2·2<br>(-10·7, 14·3)    |
| <b>Turkmenistan</b>          | 30117<br>(28824, 31335)       | 1183·7<br>(1132·6, 1226·4) | 90746<br>(82578, 98999)       | 1842·5<br>(1681·7, 2006·2) | 55·7<br>(41·1, 71·1)    |
| <b>Uzbekistan</b>            | 145578<br>(140914, 150260)    | 1010·8<br>(979·2, 1043·8)  | 397270<br>(352250, 444626)    | 1362·3<br>(1209·8, 1520·6) | 34·8<br>(19·3, 51·3)    |
| <b>Central Latin America</b> | 1106335<br>(1085204, 1126838) | 1012<br>(993·1, 1030·6)    | 1774331<br>(1698187, 1860687) | 717·9<br>(687·5, 753·1)    | -29·1<br>(-32·3, -25·4) |
| <b>Colombia</b>              | 63247<br>(60114, 66170)       | 281·5<br>(268·3, 294)      | 106544<br>(93989, 120334)     | 199·5<br>(175·9, 225·4)    | -29·1<br>(-36·7, -20·5) |
| <b>Costa Rica</b>            | 9710<br>(9276, 10143)         | 468·9<br>(448·5, 488·6)    | 23176<br>(20975, 25857)       | 459·1<br>(416, 512·1)      | -2·1<br>(-11·2, 10·4)   |
| <b>El Salvador</b>           | 33015<br>(26774, 35681)       | 878·8<br>(741·6, 940·2)    | 43720<br>(35311, 57837)       | 761·5<br>(615·6, 1005·5)   | -13·4<br>(-31·5, 24·6)  |
| <b>Guatemala</b>             | 83848<br>(80264, 87457)       | 1511·1<br>(1450·2, 1571·5) | 160358<br>(142832, 179430)    | 1227·9<br>(1096·7, 1372·5) | -18·7<br>(-27·9, -8·2)  |
| <b>Honduras</b>              | 39054<br>(33145, 49298)       | 1223·6<br>(1021·9, 1650·2) | 76380<br>(58534, 101899)      | 1083<br>(827·1, 1464·1)    | -11·5<br>(-30·4, 12·3)  |
| <b>Mexico</b>                | 787959<br>(773767, 803028)    | 1428·3<br>(1402·8, 1454·4) | 1198862<br>(1152734, 1252679) | 970·9<br>(934, 1014·6)     | -32<br>(-34·9, -28·6)   |
| <b>Nicaragua</b>             | 15460<br>(13969, 16983)       | 702·9<br>(636·8, 768)      | 36176<br>(26226, 42330)       | 695·5<br>(507·2, 810·5)    | -1·1<br>(-25·5, 15·8)   |
| <b>Panama</b>                | 6032<br>(5664, 6425)          | 342·2<br>(320·7, 364·3)    | 12468<br>(11438, 13509)       | 313·3<br>(287·7, 339·2)    | -8·4<br>(-16·7, 0·2)    |
| <b>Venezuela</b>             | 68011<br>(65158, 70833)       | 551·5<br>(528, 574)        | 116647<br>(99145, 136910)     | 382·1<br>(324·9, 447·6)    | -30·7<br>(-41·3, -18·2) |
| <b>Andean Latin America</b>  | 211414<br>(192305, 236063)    | 764·5<br>(701·1, 848·1)    | 298097<br>(267305, 328824)    | 532·2<br>(478, 587·1)      | -30·4<br>(-39·2, -20·6) |
| <b>Bolivia</b>               | 37795<br>(26208, 53872)       | 856·6<br>(620·3, 1176·5)   | 59812<br>(46141, 75490)       | 638·5<br>(496·3, 807·8)    | -25·5<br>(-45·2, 4·3)   |
| <b>Ecuador</b>               | 48437<br>(46341, 50735)       | 692·3<br>(664·9, 720·1)    | 89123<br>(79337, 99547)       | 582·2<br>(520·1, 649·8)    | -15·9<br>(-24·8, -5·6)  |
| <b>Peru</b>                  | 125182<br>(110368, 138273)    | 771·3<br>(693·7, 850·9)    | 149162<br>(123441, 175426)    | 477·3<br>(396·1, 561·3)    | -38·1<br>(-48·9, -25·5) |
| <b>Caribbean</b>             | 170327<br>(155334, 187834)    | 582·2<br>(532·8, 636·6)    | 206692<br>(181660, 249171)    | 409<br>(359·1, 494·4)      | -29·8<br>(-36·8, -13·7) |
| <b>Antigua and Barbuda</b>   | 232<br>(216, 250)             | 459·5<br>(425·9, 497·1)    | 312<br>(283, 344)             | 298<br>(271·5, 327·9)      | -35·1<br>(-42·2, -26·9) |
| <b>The Bahamas</b>           | 1265<br>(1170, 1363)          | 661·5<br>(611·1, 711·4)    | 1680<br>(1501, 1877)          | 400·5<br>(360·3, 445·8)    | -39·5<br>(-47·2, -30·6) |

|                                         |                               |                            |                               |                            |                         |
|-----------------------------------------|-------------------------------|----------------------------|-------------------------------|----------------------------|-------------------------|
| <b>Barbados</b>                         | 914<br>(855, 974)             | 357.1<br>(333.3, 381.2)    | 1042<br>(927, 1168)           | 241.3<br>(215, 270)        | -32.4<br>(-40.7, -23.4) |
| <b>Belize</b>                           | 672<br>(615, 733)             | 585.1<br>(529.7, 638.9)    | 1839<br>(1693, 1997)          | 586.5<br>(538.1, 636.9)    | 0.2<br>(-9.7, 12)       |
| <b>Bermuda</b>                          | 244<br>(223, 267)             | 371.7<br>(340.8, 407.4)    | 179<br>(160, 208)             | 162.9<br>(144.1, 189.8)    | -56.2<br>(-62.9, -46.9) |
| <b>Cuba</b>                             | 29340<br>(28010, 31322)       | 276.5<br>(263.7, 295.5)    | 52350<br>(45759, 60164)       | 304.1<br>(266.9, 347.8)    | 10<br>(-3.5, 23.9)      |
| <b>Dominica</b>                         | 255<br>(238, 274)             | 389.3<br>(361.8, 419)      | 269<br>(244, 296)             | 321.7<br>(291.4, 352.9)    | -17.4<br>(-26.3, -7.7)  |
| <b>Dominican Republic</b>               | 46903<br>(35095, 52840)       | 924.6<br>(662.4, 1035.5)   | 43525<br>(33354, 75295)       | 450.1<br>(345.9, 768.3)    | -51.3<br>(-64.6, 7.9)   |
| <b>Grenada</b>                          | 407<br>(378, 436)             | 614.6<br>(568, 662.5)      | 500<br>(458, 547)             | 382<br>(349.7, 417.3)      | -37.9<br>(-44.1, -30.8) |
| <b>Guyana</b>                           | 5794<br>(5505, 6095)          | 1140.9<br>(1084, 1199.2)   | 5573<br>(4829, 6444)          | 785.3<br>(683.5, 905.3)    | -31.2<br>(-41, -19.5)   |
| <b>Haiti</b>                            | 35138<br>(22039, 48622)       | 810.6<br>(539.4, 1144.2)   | 52369<br>(37763, 75117)       | 634.8<br>(462.4, 924.4)    | -21.7<br>(-41.5, 7.4)   |
| <b>Jamaica</b>                          | 4950<br>(4572, 5348)          | 260.7<br>(239.9, 281.7)    | 5572<br>(4570, 7138)          | 192.5<br>(157.8, 246)      | -26.2<br>(-40.8, -1)    |
| <b>Puerto Rico</b>                      | 29722<br>(28568, 31042)       | 817.4<br>(786, 854)        | 22953<br>(21108, 24902)       | 404.9<br>(371.6, 441.9)    | -50.5<br>(-54.8, -45)   |
| <b>Saint Lucia</b>                      | 640<br>(601, 681)             | 675.4<br>(632.9, 719.8)    | 787<br>(714, 864)             | 371.5<br>(336.9, 407.6)    | -45<br>(-50.8, -38.1)   |
| <b>Saint Vincent and the Grenadines</b> | 349<br>(317, 377)             | 465<br>(421.7, 503.6)      | 508<br>(458, 564)             | 380.2<br>(344.2, 421.5)    | -18.2<br>(-28.2, -6)    |
| <b>Suriname</b>                         | 2230<br>(2054, 2418)          | 737.1<br>(679.4, 798.8)    | 3525<br>(3079, 3991)          | 573.9<br>(502.7, 648.7)    | -22.1<br>(-32.6, -10.5) |
| <b>Trinidad and Tobago</b>              | 4859<br>(4606, 5118)          | 499.4<br>(473.2, 526.1)    | 5498<br>(4489, 6728)          | 312.7<br>(256.2, 380.7)    | -37.4<br>(-49.3, -23.8) |
| <b>Virgin Islands</b>                   | 586<br>(528, 658)             | 585.4<br>(530, 655.5)      | 778<br>(643, 908)             | 463.8<br>(387.8, 534.4)    | -20.8<br>(-36.1, -5.5)  |
| <b>Tropical Latin America</b>           | 812621<br>(791721, 833876)    | 682.1<br>(665.4, 699.4)    | 1131886<br>(1093665, 1170479) | 464.5<br>(448.9, 480.2)    | -31.9<br>(-34.2, -29.1) |
| <b>Brazil</b>                           | 802164<br>(781208, 823988)    | 689.3<br>(672.4, 707.5)    | 1111695<br>(1073714, 1150858) | 467.7<br>(451.5, 483.9)    | -32.2<br>(-34.4, -29.3) |
| <b>Paraguay</b>                         | 10457<br>(8821, 13834)        | 379.8<br>(318.4, 511.7)    | 20191<br>(15831, 30288)       | 344.6<br>(272.3, 514.9)    | -9.3<br>(-29, 14.8)     |
| <b>East Asia</b>                        | 5604590<br>(4556901, 6045875) | 513.5<br>(418.2, 554)      | 5000632<br>(4603996, 6164299) | 242.1<br>(222.4, 297.5)    | -52.8<br>(-58.7, -34.6) |
| <b>China</b>                            | 5256956<br>(4223922, 5684869) | 507.2<br>(409.2, 548.3)    | 4599051<br>(4210440, 5703844) | 233.9<br>(214, 288.7)      | -53.9<br>(-59.9, -34.9) |
| <b>North Korea</b>                      | 95726<br>(76545, 120397)      | 490.7<br>(396.1, 616.5)    | 141076<br>(104851, 189941)    | 438.3<br>(326.7, 586.7)    | -10.7<br>(-33.8, 19.9)  |
| <b>Taiwan (province of China)</b>       | 158535<br>(153660, 163786)    | 869.3<br>(843.8, 898.1)    | 179948<br>(168160, 193242)    | 513.4<br>(479.6, 550.9)    | -40.9<br>(-45.1, -36)   |
| <b>Southeast Asia</b>                   | 3916840<br>(3420502, 4299406) | 1141.1<br>(1006.7, 1235.2) | 5430302<br>(5059995, 5816943) | 818.9<br>(762.9, 878.6)    | -28.2<br>(-35.3, -17.2) |
| <b>Cambodia</b>                         | 154110<br>(118801, 198447)    | 2362.1<br>(1848.9, 2978.7) | 280713<br>(236791, 331674)    | 2097.4<br>(1775.9, 2488.4) | -11.2<br>(-28.6, 20)    |
| <b>Indonesia</b>                        | 2072497<br>(1828335, 2293423) | 1539.9<br>(1364.5, 1670.1) | 2430249<br>(2263456, 2680719) | 1007.6<br>(937.9, 1102)    | -34.6<br>(-41.3, -25.3) |
| <b>Laos</b>                             | 32099<br>(22038, 41967)       | 1156.6<br>(816.5, 1499.8)  | 53682<br>(38484, 70424)       | 991.8<br>(716.3, 1314.4)   | -14.3<br>(-43.8, 26.9)  |
| <b>Malaysia</b>                         | 46342<br>(41151, 51103)       | 403.1<br>(345, 442.7)      | 87860<br>(74193, 105063)      | 309.2<br>(259.2, 371.3)    | -23.3<br>(-38.1, -7.6)  |
| <b>Maldives</b>                         | 341<br>(212, 511)             | 282.4<br>(182.1, 394.9)    | 535<br>(445, 615)             | 151.5<br>(124.5, 173.3)    | -46.3<br>(-64.2, -9.6)  |
| <b>Mauritius</b>                        | 8545<br>(8134, 8963)          | 928.3<br>(884.2, 971.2)    | 7349<br>(6700, 8132)          | 439.4<br>(401.2, 484.5)    | -52.7<br>(-57.5, -47.1) |
| <b>Myanmar</b>                          | 661592<br>(477455, 867490)    | 2117<br>(1530.1, 2712.8)   | 818991<br>(652734, 985074)    | 1549<br>(1263.2, 1850.5)   | -26.8<br>(-46.5, 7.2)   |

|                                       |                               |                            |                               |                            |                         |
|---------------------------------------|-------------------------------|----------------------------|-------------------------------|----------------------------|-------------------------|
| <b>Philippines</b>                    | 141782<br>(130866, 153848)    | 331.6<br>(305.6, 358.9)    | 406664<br>(348141, 476246)    | 470.3<br>(403.3, 545.9)    | 41.9<br>(20.5, 68.5)    |
| <b>Sri Lanka</b>                      | 117926<br>(91253, 130041)     | 847.8<br>(671.7, 930.9)    | 117453<br>(91886, 146062)     | 467.9<br>(369, 579.4)      | -44.8<br>(-56, -31.2)   |
| <b>Seychelles</b>                     | 419<br>(370, 490)             | 727.7<br>(637.8, 853.5)    | 845<br>(740, 936)             | 708.4<br>(620.8, 784.1)    | -2.7<br>(-17.1, 17.3)   |
| <b>Thailand</b>                       | 331995<br>(285930, 375116)    | 694.8<br>(605, 781.9)      | 546302<br>(442369, 622915)    | 563.7<br>(464.9, 639)      | -18.9<br>(-32.4, -1)    |
| <b>East Timor</b>                     | 3400<br>(2525, 4492)          | 695.7<br>(479.6, 940.7)    | 6893<br>(3936, 9246)          | 761.1<br>(436.3, 1023)     | 9.4<br>(-31, 61.6)      |
| <b>Vietnam</b>                        | 340594<br>(273223, 437681)    | 740.6<br>(581.3, 959.1)    | 665620<br>(542231, 828968)    | 653.2<br>(535, 803.5)      | -11.8<br>(-38.8, 23)    |
| <b>Oceania</b>                        | 39622<br>(34287, 46284)       | 842.4<br>(729, 981.4)      | 71820<br>(59251, 87330)       | 704.1<br>(588.5, 853)      | -16.4<br>(-32.2, 0.9)   |
| <b>American Samoa</b>                 | 159<br>(131, 189)             | 473.4<br>(384.5, 573.9)    | 205<br>(181, 232)             | 398.5<br>(352.4, 449.4)    | -15.8<br>(-31.6, 2.7)   |
| <b>Federated States of Micronesia</b> | 611<br>(453, 879)             | 898.4<br>(675.3, 1306.8)   | 512<br>(317, 720)             | 565.4<br>(358.4, 793.9)    | -37.1<br>(-56.5, -13.5) |
| <b>Fiji</b>                           | 1497<br>(1259, 1779)          | 264.4<br>(219.4, 312.9)    | 2351<br>(2031, 2743)          | 269.7<br>(232.2, 313.6)    | 2<br>(-19.1, 26.7)      |
| <b>Guam</b>                           | 750<br>(591, 888)             | 683.8<br>(544.8, 805.5)    | 1106<br>(978, 1257)           | 608.9<br>(539.1, 695.1)    | -11<br>(-28.1, 14.3)    |
| <b>Kiribati</b>                       | 491<br>(342, 634)             | 895.9<br>(632.9, 1197)     | 696<br>(427, 953)             | 736.5<br>(467, 1016.5)     | -17.8<br>(-36.2, 3.7)   |
| <b>Marshall Islands</b>               | 249<br>(178, 307)             | 931.2<br>(669.2, 1164.4)   | 340<br>(214, 483)             | 733.4<br>(469.6, 1020)     | -21.2<br>(-38.9, -0.4)  |
| <b>Northern Mariana Islands</b>       | 208<br>(166, 259)             | 615.2<br>(504.2, 759)      | 268<br>(232, 309)             | 476<br>(414, 542.8)        | -22.6<br>(-39.3, -2.3)  |
| <b>Papua New Guinea</b>               | 28846<br>(23866, 34979)       | 964.7<br>(803.4, 1167.1)   | 55838<br>(44018, 70731)       | 764.5<br>(605.2, 968.4)    | -20.8<br>(-38.9, 0.1)   |
| <b>Samoa</b>                          | 712<br>(536, 1061)            | 627.3<br>(470.2, 951.8)    | 750<br>(555, 1054)            | 466.4<br>(347, 653.5)      | -25.6<br>(-42.2, -5.4)  |
| <b>Solomon Islands</b>                | 1628<br>(1293, 2011)          | 774.1<br>(610.4, 953.9)    | 2945<br>(2380, 3522)          | 623.4<br>(508.8, 738.8)    | -19.5<br>(-36.9, 2.2)   |
| <b>Tonga</b>                          | 504<br>(433, 583)             | 725.2<br>(628.4, 834.6)    | 632<br>(519, 752)             | 704.6<br>(577.3, 841.8)    | -2.8<br>(-21.1, 19.9)   |
| <b>Vanuatu</b>                        | 1354<br>(659, 2195)           | 1331.7<br>(643.7, 2191.5)  | 2220<br>(1101, 3900)          | 1011<br>(496.6, 1799.1)    | -24.1<br>(-44.7, 5.6)   |
| <b>North Africa and Middle East</b>   | 1483249<br>(1308019, 1634394) | 690<br>(558.9, 772.1)      | 2214073<br>(1915813, 2570616) | 465.2<br>(391.9, 541.1)    | -32.6<br>(-45.1, -19.5) |
| <b>Afghanistan</b>                    | 47665<br>(19616, 73288)       | 572.1<br>(254.5, 841.4)    | 91736<br>(58758, 121732)      | 511<br>(336.6, 695.4)      | -10.7<br>(-33.3, 73.4)  |
| <b>Algeria</b>                        | 55079<br>(43696, 74731)       | 329.3<br>(250.6, 465.2)    | 87737<br>(70889, 108034)      | 242.9<br>(195.7, 301.5)    | -26.2<br>(-40.7, -10.9) |
| <b>Bahrain</b>                        | 1270<br>(1097, 1436)          | 491.2<br>(416.7, 551.8)    | 3015<br>(2556, 3490)          | 235.6<br>(200.6, 268.1)    | -52<br>(-59.6, -43.1)   |
| <b>Egypt</b>                          | 803465<br>(724692, 859333)    | 2563.1<br>(1867.8, 2805.9) | 1175431<br>(909039, 1523644)  | 1918.4<br>(1417.4, 2480.2) | -25.2<br>(-43.2, -4.5)  |
| <b>Iran</b>                           | 108975<br>(93544, 122618)     | 270<br>(237.4, 301.6)      | 159319<br>(145337, 170236)    | 209.9<br>(192.1, 223.8)    | -22.3<br>(-32.5, -10.3) |
| <b>Iraq</b>                           | 37003<br>(29877, 46660)       | 328.9<br>(268.1, 411.2)    | 50003<br>(44381, 55325)       | 153<br>(138.2, 169.7)      | -53.5<br>(-63.4, -41.2) |
| <b>Jordan</b>                         | 7446<br>(5983, 9335)          | 349<br>(284.9, 437.9)      | 15657<br>(13634, 17924)       | 210.1<br>(181.6, 241.9)    | -39.8<br>(-54, -19.4)   |
| <b>Kuwait</b>                         | 2267<br>(2081, 2465)          | 200.4<br>(184.1, 216.3)    | 5822<br>(4901, 6669)          | 170.2<br>(144.6, 192.4)    | -15.1<br>(-29.7, -3.3)  |
| <b>Lebanon</b>                        | 9466<br>(7557, 11318)         | 342.3<br>(270.2, 410.4)    | 15777<br>(11902, 20209)       | 230.9<br>(172.8, 293.9)    | -32.5<br>(-54.3, -9.1)  |
| <b>Libya</b>                          | 10255<br>(7842, 13359)        | 398.2<br>(300.6, 536.4)    | 18500<br>(13120, 23677)       | 330.9<br>(236, 417.6)      | -16.9<br>(-38.7, 19.4)  |
| <b>Morocco</b>                        | 66448<br>(53949, 81849)       | 364.8<br>(296.4, 466.7)    | 95428<br>(78661, 113359)      | 284.5<br>(236.8, 336.6)    | -22<br>(-40.6, -1.4)    |

|                                    |                               |                            |                                 |                           |                         |
|------------------------------------|-------------------------------|----------------------------|---------------------------------|---------------------------|-------------------------|
| <b>Palestine</b>                   | 4109<br>(2995, 5550)          | 318.9<br>(240.1, 415)      | 7541<br>(6776, 8382)            | 241.4<br>(217.2, 266.9)   | -24.3<br>(-41.9, 4)     |
| <b>Oman</b>                        | 3372<br>(2783, 4060)          | 326.9<br>(255.3, 402.8)    | 6778<br>(5065, 8399)            | 235.9<br>(180.2, 288.8)   | -27.8<br>(-44.8, -6.3)  |
| <b>Qatar</b>                       | 1056<br>(887, 1257)           | 537.3<br>(436.3, 635)      | 4474<br>(3465, 5583)            | 307.3<br>(234.7, 373)     | -42.8<br>(-55.4, -25.9) |
| <b>Saudi Arabia</b>                | 42850<br>(29043, 55375)       | 553<br>(283.5, 751.8)      | 77709<br>(57422, 97205)         | 378.7<br>(251.1, 474.6)   | -31.5<br>(-52.7, -0.5)  |
| <b>Sudan</b>                       | 77347<br>(44674, 117251)      | 585.3<br>(366.5, 875.6)    | 105267<br>(77901, 141827)       | 424.2<br>(293, 595.2)     | -27.5<br>(-46.1, 8.8)   |
| <b>Syria</b>                       | 30963<br>(25471, 38132)       | 392.1<br>(332.4, 454)      | 47918<br>(38995, 57047)         | 322.2<br>(265.1, 380.9)   | -17.8<br>(-33.9, 5.4)   |
| <b>Tunisia</b>                     | 17302<br>(13851, 21522)       | 277.3<br>(214.8, 351.9)    | 25374<br>(19907, 31775)         | 209.1<br>(164.4, 261.7)   | -24.6<br>(-44.4, -1.7)  |
| <b>Turkey</b>                      | 115132<br>(78683, 153228)     | 257<br>(179.6, 337)        | 140846<br>(124523, 157465)      | 162.5<br>(143.6, 182.6)   | -36.7<br>(-52.8, -6.4)  |
| <b>United Arab Emirates</b>        | 2933<br>(1542, 4131)          | 394.6<br>(171.1, 569.8)    | 16833<br>(9623, 22061)          | 279.7<br>(144.6, 369.5)   | -29.1<br>(-51.4, 7.3)   |
| <b>Yemen</b>                       | 37891<br>(20247, 55899)       | 493.2<br>(271.4, 782)      | 60842<br>(45798, 81037)         | 336.8<br>(245.5, 458.5)   | -31.7<br>(-54.8, 18.2)  |
| <b>South Asia</b>                  | 6329326<br>(5523004, 7738897) | 734.7<br>(656.9, 864.2)    | 10118561<br>(9209547, 12797543) | 633.1<br>(575.7, 803.2)   | -13.8<br>(-22.8, -0.8)  |
| <b>Bangladesh</b>                  | 1013235<br>(806819, 1178722)  | 1225.1<br>(940.4, 1415.4)  | 857197<br>(725707, 1009115)     | 608.6<br>(517.4, 720.3)   | -50.3<br>(-61, -30.7)   |
| <b>Bhutan</b>                      | 4186<br>(3352, 5221)          | 1099.5<br>(897.7, 1343.6)  | 5268<br>(3598, 7035)            | 667.4<br>(469.9, 897)     | -39.3<br>(-58.9, -11.4) |
| <b>India</b>                       | 4331241<br>(3649309, 5751620) | 630.5<br>(539.4, 817.3)    | 7401548<br>(6597109, 10026479)  | 582.2<br>(518.4, 790.5)   | -7.7<br>(-18.6, 8.9)    |
| <b>Nepal</b>                       | 123508<br>(92659, 156435)     | 883.6<br>(678.4, 1137.6)   | 178703<br>(126999, 236615)      | 718.1<br>(513.4, 950)     | -18.7<br>(-41.5, 11.1)  |
| <b>Pakistan</b>                    | 857156<br>(675494, 1039120)   | 1122.8<br>(808.2, 1390.1)  | 1675846<br>(1302686, 2084646)   | 1050.9<br>(793, 1317.3)   | -6.4<br>(-24.9, 16.1)   |
| <b>Southern sub-Saharan Africa</b> | 205606<br>(173950, 226799)    | 574.1<br>(472.3, 640)      | 222780<br>(185409, 261150)      | 341.3<br>(284.8, 399.9)   | -40.5<br>(-53.3, -25.7) |
| <b>Botswana</b>                    | 4104<br>(2642, 5910)          | 539.2<br>(356, 765.9)      | 6179<br>(4520, 8659)            | 355.7<br>(266.3, 494.4)   | -34<br>(-50.7, -11.8)   |
| <b>eSwatini</b>                    | 3736<br>(2742, 4968)          | 895.9<br>(659.7, 1200.5)   | 4569<br>(3436, 6140)            | 610.7<br>(461.6, 818)     | -31.8<br>(-52.3, -3.3)  |
| <b>Lesotho</b>                     | 6177<br>(2854, 9411)          | 520.3<br>(234.6, 795.8)    | 7173<br>(3445, 11037)           | 495.8<br>(238.2, 760.8)   | -4.7<br>(-37.2, 52.7)   |
| <b>Namibia</b>                     | 3119<br>(1631, 4580)          | 353.7<br>(181.5, 529.1)    | 7213<br>(4451, 11179)           | 423.6<br>(262, 644.4)     | 19.8<br>(-23.7, 79.2)   |
| <b>South Africa</b>                | 151725<br>(128566, 170833)    | 561.5<br>(455.7, 641.8)    | 148069<br>(132916, 163511)      | 294.6<br>(263.6, 325.1)   | -47.5<br>(-53.7, -36.9) |
| <b>Zimbabwe</b>                    | 36746<br>(30426, 42968)       | 667.4<br>(555.6, 779.2)    | 49576<br>(17130, 85660)         | 545.1<br>(182.4, 938.9)   | -18.3<br>(-74.3, 46.4)  |
| <b>Western sub-Saharan Africa</b>  | 1828673<br>(1229336, 2520617) | 1531.6<br>(977, 2146.5)    | 2620827<br>(1809700, 3638507)   | 1001.9<br>(684.4, 1404.1) | -34.6<br>(-51, -12.8)   |
| <b>Benin</b>                       | 31210<br>(22684, 43219)       | 1101<br>(780.7, 1556.6)    | 46871<br>(34344, 63484)         | 688.5<br>(492, 947.8)     | -37.5<br>(-65, -9.6)    |
| <b>Burkina Faso</b>                | 62283<br>(50633, 73862)       | 1072.2<br>(870.8, 1247.6)  | 76968<br>(13226, 132788)        | 605.6<br>(80.9, 1066.6)   | -43.5<br>(-92.9, 3.2)   |
| <b>Cameroon</b>                    | 86065<br>(66967, 103205)      | 1393.2<br>(1076.1, 1662.4) | 147091<br>(71397, 214680)       | 904.1<br>(428.8, 1332.6)  | -35.1<br>(-63.6, -8.7)  |
| <b>Cape Verde</b>                  | 1294<br>(1016, 1591)          | 547.5<br>(435.8, 669.6)    | 2908<br>(2561, 3328)            | 590.5<br>(520.7, 675.7)   | 7.8<br>(-15.3, 38.3)    |
| <b>Chad</b>                        | 35190<br>(24394, 47292)       | 945.8<br>(628.7, 1301)     | 77279<br>(60136, 97024)         | 953<br>(724.3, 1209.1)    | 0.8<br>(-23.9, 41.9)    |
| <b>Côte d'Ivoire</b>               | 76867<br>(57632, 102018)      | 1142.6<br>(854.9, 1531.9)  | 133723<br>(103991, 170121)      | 852.3<br>(654.9, 1099.1)  | -25.4<br>(-49.9, -0.8)  |
| <b>The Gambia</b>                  | 4986<br>(3136, 7248)          | 913<br>(562.2, 1350.3)     | 9944<br>(7262, 12818)           | 789.3<br>(576.5, 1003.6)  | -13.6<br>(-39, 31.2)    |

|                                   |                               |                            |                               |                            |                         |
|-----------------------------------|-------------------------------|----------------------------|-------------------------------|----------------------------|-------------------------|
| <b>Ghana</b>                      | 98651<br>(81006, 122478)      | 1087.4<br>(884.9, 1332.7)  | 139350<br>(52567, 238188)     | 672.3<br>(244.4, 1172.1)   | -38.2<br>(-79.1, 2.2)   |
| <b>Guinea</b>                     | 46206<br>(31077, 73306)       | 1061.1<br>(690.2, 1731.5)  | 58132<br>(38626, 89394)       | 808.7<br>(528, 1245.5)     | -23.8<br>(-42.7, 7.1)   |
| <b>Guinea-Bissau</b>              | 7826<br>(5148, 10999)         | 1337.4<br>(890.2, 1827.9)  | 11138<br>(8435, 15025)        | 1033.5<br>(787.4, 1389.8)  | -22.7<br>(-42.5, 9.7)   |
| <b>Liberia</b>                    | 21441<br>(15847, 28033)       | 1522<br>(1114.4, 2024.7)   | 26791<br>(19587, 36135)       | 926.1<br>(687.9, 1232.6)   | -39.1<br>(-53.4, -22.5) |
| <b>Mali</b>                       | 67686<br>(44299, 100744)      | 1181.3<br>(782.2, 1799.3)  | 71580<br>(33232, 112753)      | 562<br>(237.5, 940.5)      | -52.4<br>(-84.7, -18.1) |
| <b>Mauritania</b>                 | 12306<br>(9089, 16251)        | 944.8<br>(708.1, 1269)     | 14252<br>(9995, 19271)        | 557.9<br>(396.4, 757.8)    | -40.9<br>(-54.2, -23.7) |
| <b>Niger</b>                      | 44112<br>(30396, 62317)       | 902.4<br>(656.1, 1371)     | 61380<br>(22491, 98988)       | 518.9<br>(164.3, 873.7)    | -42.5<br>(-76.9, -13.3) |
| <b>Nigeria</b>                    | 1134833<br>(600489, 1741364)  | 1958<br>(967.4, 3102.1)    | 1623367<br>(754087, 2697630)  | 1325.9<br>(589.9, 2230.2)  | -32.3<br>(-52.3, 0)     |
| <b>São Tomé and Príncipe</b>      | 1780<br>(1232, 2193)          | 2121.5<br>(1420.4, 2662.2) | 2759<br>(2148, 3873)          | 1984.1<br>(1533.6, 2770.6) | -6.5<br>(-36.6, 31)     |
| <b>Senegal</b>                    | 35786<br>(23680, 48626)       | 759.9<br>(494.8, 1050.5)   | 49965<br>(24238, 74333)       | 522.7<br>(235.7, 781.3)    | -31.2<br>(-55.1, -12)   |
| <b>Sierra Leone</b>               | 37276<br>(26297, 54420)       | 1472<br>(1015.8, 2155)     | 39458<br>(17498, 56634)       | 820.5<br>(352, 1179.8)     | -44.3<br>(-83, -0.6)    |
| <b>Togo</b>                       | 22825<br>(17624, 29731)       | 1143.8<br>(871, 1497.9)    | 27843<br>(10575, 41549)       | 560.4<br>(202.2, 850.4)    | -51<br>(-85.4, -15.3)   |
| <b>Eastern sub-Saharan Africa</b> | 1302658<br>(1057855, 1600427) | 1290.3<br>(1070.7, 1543.1) | 1942504<br>(1498999, 2340490) | 917.5<br>(707.6, 1105)     | -28.9<br>(-47.8, -3)    |
| <b>Burundi</b>                    | 57737<br>(37353, 86475)       | 1974.7<br>(1279.1, 2906.3) | 59326<br>(19853, 94832)       | 1041.2<br>(332.3, 1663.3)  | -47.3<br>(-84.1, -11)   |
| <b>Comoros</b>                    | 1642<br>(334, 2825)           | 602.7<br>(104.9, 1044.6)   | 2737<br>(687, 4253)           | 511.7<br>(124.8, 794.3)    | -15.1<br>(-34.9, 24.7)  |
| <b>Djibouti</b>                   | 1790<br>(1187, 2589)          | 733.5<br>(491.7, 1053.6)   | 4904<br>(3170, 7090)          | 646.5<br>(412.6, 925.3)    | -11.9<br>(-38.5, 27.5)  |
| <b>Eritrea</b>                    | 19672<br>(11184, 32144)       | 1376.4<br>(869.2, 2205.2)  | 41149<br>(31060, 54247)       | 1221.7<br>(941.6, 1570)    | -11.2<br>(-39.6, 43.3)  |
| <b>Ethiopia</b>                   | 371207<br>(228365, 583703)    | 1391.8<br>(887.4, 2117.3)  | 524217<br>(439909, 616423)    | 991.5<br>(845, 1171.3)     | -28.8<br>(-55.5, 22.1)  |
| <b>Kenya</b>                      | 169349<br>(109550, 239694)    | 1555.8<br>(1001.2, 2203.3) | 338240<br>(224938, 466322)    | 1227.4<br>(820.9, 1695.4)  | -21.1<br>(-51.4, 3.6)   |
| <b>Madagascar</b>                 | 73862<br>(52870, 112271)      | 1032.1<br>(748.9, 1525.8)  | 104531<br>(77513, 131138)     | 713.2<br>(524.9, 897)      | -30.9<br>(-61, 8.4)     |
| <b>Malawi</b>                     | 73614<br>(36201, 97353)       | 1395.8<br>(783.4, 1804.9)  | 86430<br>(20607, 136308)      | 889.2<br>(208.1, 1389.3)   | -36.3<br>(-86.6, 45.9)  |
| <b>Mozambique</b>                 | 69875<br>(46287, 91850)       | 799.9<br>(536.2, 1065.5)   | 90551<br>(19906, 144289)      | 544<br>(109.7, 868.8)      | -32<br>(-87.3, 37.3)    |
| <b>Rwanda</b>                     | 90751<br>(69954, 108164)      | 2369.2<br>(1839.6, 2818.8) | 86965<br>(55901, 122322)      | 1169.4<br>(752.5, 1629.6)  | -50.6<br>(-69.1, -26)   |
| <b>Somalia</b>                    | 34525<br>(14345, 62012)       | 912<br>(441.4, 1573.9)     | 88201<br>(54341, 132713)      | 1003.4<br>(627, 1483.8)    | 10<br>(-28.5, 94.7)     |
| <b>South Sudan</b>                | 27267<br>(13426, 47001)       | 871.6<br>(478.6, 1459)     | 48915<br>(32785, 71056)       | 927.1<br>(625.4, 1337.5)   | 6.4<br>(-29.7, 77.9)    |
| <b>Tanzania</b>                   | 147022<br>(98302, 190042)     | 1035.8<br>(747.8, 1331.9)  | 204710<br>(93393, 293985)     | 643<br>(279.9, 951.1)      | -37.9<br>(-73.4, 0.2)   |
| <b>Uganda</b>                     | 89946<br>(57165, 126052)      | 1048.9<br>(669.6, 1486.7)  | 149135<br>(64395, 223473)     | 790<br>(328.7, 1176.7)     | -24.7<br>(-57, 7.9)     |
| <b>Zambia</b>                     | 73736<br>(52704, 90124)       | 1856.4<br>(1418, 2229.7)   | 111273<br>(92856, 131234)     | 1236.3<br>(1033.7, 1448.3) | -33.4<br>(-47.9, -10.8) |
| <b>Central sub-Saharan Africa</b> | 383144<br>(286930, 506821)    | 1176.1<br>(877.8, 1583)    | 752822<br>(598548, 950901)    | 1018.9<br>(795.5, 1312.6)  | -13.4<br>(-28.3, 8.8)   |
| <b>Angola</b>                     | 78981<br>(43467, 125015)      | 1334.2<br>(742.6, 2138.7)  | 195238<br>(145570, 264544)    | 1237.7<br>(922.3, 1717.5)  | -7.2<br>(-35, 57.1)     |
| <b>Central African Republic</b>   | 20253<br>(11203, 29519)       | 1206<br>(689.9, 1724.1)    | 26504<br>(11796, 43648)       | 856.1<br>(373.6, 1390.3)   | -29<br>(-52.2, -4.6)    |

|                          |                            |                            |                            |                           |                         |
|--------------------------|----------------------------|----------------------------|----------------------------|---------------------------|-------------------------|
| <b>Congo</b>             | 21136<br>(14633, 31613)    | 1448.7<br>(996.6, 2208.3)  | 35703<br>(23503, 51082)    | 1038.7<br>(680.9, 1498.6) | -28.3<br>(-47, 0.6)     |
| <b>DR Congo</b>          | 248725<br>(183181, 330680) | 1099.9<br>(809, 1490.3)    | 475995<br>(357892, 632326) | 959.2<br>(709.1, 1281.2)  | -12.8<br>(-32.1, 12.9)  |
| <b>Equatorial Guinea</b> | 2882<br>(931, 4968)        | 1075.8<br>(346.2, 1864.7)  | 5534<br>(3172, 8908)       | 791<br>(445.6, 1268.5)    | -26.5<br>(-55.8, 59.9)  |
| <b>Gabon</b>             | 11167<br>(7762, 15111)     | 1682.1<br>(1158.6, 2296.5) | 13848<br>(9575, 19748)     | 1073.3<br>(727.5, 1554.9) | -36.2<br>(-50.3, -17.7) |

**Appendix Table 5: Prevalent cases and age-standardised prevalence rates of decompensated cirrhosis per 100 000 in 1990 and 2017 for both sexes combined by location**

|                                  | 1990                          |                      | 2017                             |                         |
|----------------------------------|-------------------------------|----------------------|----------------------------------|-------------------------|
|                                  | Counts (95% UI)               | Rate (95% UI)        | Counts (95% UI)                  | Rate (95% UI)           |
| <b>Global</b>                    | 5203234<br>(5079997, 5324997) | 110.6<br>(108, 113)  | 10643731<br>(10319645, 10945143) | 132.5<br>(128.6, 136.2) |
| <b>High-income North America</b> | 315799 (308627, 322956)       | 96.8 (94.5, 99)      | 569044 (554217, 584023)          | 112.3 (109.3, 115.1)    |
| <b>Canada</b>                    | 27723 (27001, 28501)          | 87.8 (85.5, 90.2)    | 55842 (53937, 57537)             | 104 (100.5, 107.1)      |
| <b>Greenland</b>                 | 34 (33, 35)                   | 69.3 (67.1, 71.4)    | 58 (56, 60)                      | 85.6 (82.9, 88.5)       |
| <b>USA</b>                       | 288035 (281553, 294438)       | 97.8 (95.6, 100)     | 513134 (499947, 526521)          | 113.2 (110.3, 116.1)    |
| <b>Australasia</b>               | 12022 (11709, 12348)          | 54.0 (52.6, 55.4)    | 28385 (27449, 29220)             | 75.7 (73.3, 78)         |
| <b>Australia</b>                 | 9897 (9633, 10177)            | 53.2 (51.8, 54.7)    | 24150 (23326, 24903)             | 76.3 (73.9, 78.6)       |
| <b>New Zealand</b>               | 2125 (2065, 2185)             | 57.8 (56.1, 59.4)    | 4235 (4101, 4373)                | 72.7 (70.5, 75.1)       |
| <b>High-income Asia-Pacific</b>  | 521335 (509825, 533006)       | 260.7 (255.2, 266.2) | 774152 (751160, 797770)          | 267.4 (259.8, 275.1)    |
| <b>Brunei</b>                    | 316 (307, 325)                | 175 (169.6, 180)     | 948 (915, 980)                   | 230.5 (222.4, 237.8)    |
| <b>Japan</b>                     | 404257 (395402, 413184)       | 257.3 (251.9, 262.9) | 571878 (555078, 588980)          | 279.8 (272, 287.8)      |
| <b>Singapore</b>                 | 4051 (3942, 4161)             | 139.9 (136.2, 143.7) | 13307 (12899, 13744)             | 195.8 (190.1, 201.9)    |
| <b>South Korea</b>               | 112711 (109566, 115604)       | 292.3 (284.3, 299.7) | 188019 (181153, 194862)          | 245.9 (237.8, 253.9)    |
| <b>Western Europe</b>            | 623132 (609143, 637088)       | 130.8 (127.9, 133.7) | 1057823 (1024683, 1090218)       | 172.3 (167.2, 177.5)    |
| <b>Andorra</b>                   | 74 (71, 76)                   | 122.2 (118.1, 126.4) | 205 (198, 213)                   | 175.1 (169, 181.7)      |
| <b>Austria</b>                   | 18634 (18141, 19120)          | 196 (191, 201.2)     | 27193 (26285, 28090)             | 216.9 (210, 223.7)      |
| <b>Belgium</b>                   | 14079 (13695, 14465)          | 113.1 (110.1, 116.1) | 26634 (25761, 27518)             | 169.2 (163.7, 174.6)    |
| <b>Cyprus</b>                    | 602 (581, 622)                | 73.9 (71.4, 76.4)    | 1834 (1772, 1897)                | 112.5 (108.8, 116.3)    |
| <b>Denmark</b>                   | 7064 (6874, 7263)             | 112.8 (109.8, 115.9) | 14704 (14198, 15214)             | 186 (179.8, 192.3)      |
| <b>Finland</b>                   | 6407 (6225, 6585)             | 106.3 (103.4, 109.2) | 14532 (14048, 15017)             | 186 (180.2, 191.9)      |
| <b>France</b>                    | 93739 (91362, 96225)          | 136.1 (132.6, 139.7) | 147882 (143046, 152890)          | 164.1 (159, 169.5)      |



|                               |                         |                      |                         |                      |
|-------------------------------|-------------------------|----------------------|-------------------------|----------------------|
| <b>Germany</b>                | 142580 (138927, 146353) | 138 (134.4, 141.5)   | 244706 (236440, 253210) | 198.3 (191.8, 205.1) |
| <b>Greece</b>                 | 13354 (12993, 13705)    | 102.5 (99.8, 105.2)  | 24005 (23221, 24792)    | 157.8 (153, 163.1)   |
| <b>Iceland</b>                | 213 (206, 221)          | 81.5 (78.8, 84.3)    | 736 (710, 763)          | 174 (167.9, 180.1)   |
| <b>Ireland</b>                | 3099 (3009, 3189)       | 83.8 (81.4, 86.3)    | 9869 (9557, 10209)      | 161.9 (156.8, 167.2) |
| <b>Israel</b>                 | 4368 (4254, 4491)       | 91.7 (89.3, 94.3)    | 14693 (14245, 15204)    | 152.6 (147.9, 157.8) |
| <b>Italy</b>                  | 139254 (135650, 142831) | 187.6 (182.9, 192.4) | 198790 (192109, 205230) | 217.6 (210.8, 224.9) |
| <b>Luxembourg</b>             | 798 (776, 822)          | 167 (162.3, 172)     | 1835 (1771, 1901)       | 232.6 (225, 240.7)   |
| <b>Malta</b>                  | 289 (280, 299)          | 68.9 (66.9, 71.1)    | 693 (670, 717)          | 110.2 (106.7, 114.1) |
| <b>Netherlands</b>            | 15425 (15000, 15846)    | 88.7 (86.2, 91.1)    | 36465 (35217, 37678)    | 152.3 (147.4, 157.4) |
| <b>Norway</b>                 | 5379 (5238, 5530)       | 110.6 (107.5, 113.7) | 9635 (9337, 9935)       | 141.2 (137, 145.4)   |
| <b>Portugal</b>               | 14234 (13833, 14636)    | 114.2 (111, 117.4)   | 21075 (20287, 21881)    | 132.8 (127.8, 137.7) |
| <b>Spain</b>                  | 65480 (63748, 67121)    | 136.7 (133.3, 140.2) | 111406 (107597, 115134) | 165.5 (159.9, 171)   |
| <b>Sweden</b>                 | 9538 (9281, 9811)       | 90.6 (88, 93.2)      | 18983 (18346, 19685)    | 141.6 (136.8, 146.8) |
| <b>Switzerland</b>            | 8520 (8278, 8755)       | 98.7 (95.9, 101.3)   | 16505 (15938, 17089)    | 134.2 (129.8, 138.5) |
| <b>UK</b>                     | 59403 (57827, 60986)    | 88 (85.7, 90.3)      | 114347 (110763, 117833) | 129.4 (125.5, 133.5) |
| <b>Southern Latin America</b> | 52308 (51122, 53583)    | 108.7 (106.3, 111.4) | 135014 (130995, 139076) | 180.2 (174.9, 185.6) |
| <b>Argentina</b>              | 31809 (31035, 32635)    | 96.4 (94.1, 98.9)    | 84857 (82224, 87748)    | 173.6 (168.1, 179.3) |
| <b>Chile</b>                  | 17382 (16927, 17842)    | 152.6 (148.7, 156.7) | 42927 (41510, 44319)    | 197 (190.4, 203.1)   |
| <b>Uruguay</b>                | 3115 (3028, 3206)       | 87.6 (85.2, 90.1)    | 7224 (6995, 7462)       | 169 (163.6, 174.3)   |
| <b>Eastern Europe</b>         | 356970 (348120, 365986) | 138.6 (135.2, 142)   | 670132 (651068, 689734) | 244.2 (237.2, 251.4) |
| <b>Belarus</b>                | 15905 (15474, 16359)    | 136.7 (132.8, 140.6) | 29113 (28145, 30093)    | 231.8 (224.7, 239.2) |
| <b>Estonia</b>                | 2645 (2566, 2728)       | 147.6 (143.3, 152.1) | 4170 (4045, 4309)       | 239.3 (232.1, 247.2) |
| <b>Latvia</b>                 | 4181 (4056, 4308)       | 133.5 (129.5, 137.7) | 5642 (5458, 5839)       | 215.8 (208.7, 223)   |
| <b>Lithuania</b>              | 6430 (6254, 6598)       | 155.6 (151.2, 159.6) | 9868 (9537, 10179)      | 258.4 (250.3, 266.3) |
| <b>Moldova</b>                | 16043 (15561, 16527)    | 336.6 (326.8, 346.2) | 14427 (13984, 14902)    | 289.6 (281.1, 298.3) |

|                               |                         |                      |                         |                      |
|-------------------------------|-------------------------|----------------------|-------------------------|----------------------|
| <b>Russia</b>                 | 219624 (213795, 225159) | 129.8 (126.5, 133.1) | 451809 (438889, 465275) | 238 (231.2, 245)     |
| <b>Ukraine</b>                | 92143 (89648, 94690)    | 148.1 (144.2, 151.9) | 155102 (150077, 160289) | 264 (255.6, 272.7)   |
| <b>Central Europe</b>         | 279739 (272896, 286246) | 196.8 (192.1, 201.3) | 416866 (405102, 430196) | 255.4 (248.2, 263.4) |
| <b>Albania</b>                | 4356 (4220, 4492)       | 159.4 (154.4, 164.5) | 8723 (8414, 9033)       | 242.3 (234.2, 250.9) |
| <b>Bosnia and Herzegovina</b> | 8307 (8036, 8572)       | 176.8 (171.3, 182.2) | 11554 (11130, 11993)    | 237 (228.9, 245.1)   |
| <b>Bulgaria</b>               | 18879 (18393, 19418)    | 168.2 (163.9, 173)   | 25132 (24260, 26046)    | 238 (230.4, 245.8)   |
| <b>Croatia</b>                | 14069 (13690, 14462)    | 228.8 (222.9, 234.9) | 14266 (13819, 14757)    | 224 (217.3, 231.6)   |
| <b>Czech Republic</b>         | 20821 (20228, 21438)    | 169.8 (165.1, 174.9) | 34778 (33674, 35971)    | 226.7 (219.6, 234.1) |
| <b>Hungary</b>                | 37546 (36503, 38628)    | 286 (278.1, 294)     | 34271 (33172, 35514)    | 240 (232.7, 247.6)   |
| <b>Montenegro</b>             | 1026 (995, 1059)        | 157.4 (152.5, 162.2) | 1910 (1845, 1979)       | 229.8 (222.3, 237.9) |
| <b>North Macedonia</b>        | 3243 (3138, 3350)       | 157.8 (152.9, 162.9) | 6766 (6521, 7010)       | 233 (225, 240.9)     |
| <b>Poland</b>                 | 72197 (70233, 74087)    | 170 (165.5, 174.6)   | 145697 (141228, 150795) | 275.1 (266.7, 284.4) |
| <b>Romania</b>                | 62096 (60430, 63865)    | 225.8 (220.1, 232)   | 79091 (76602, 81810)    | 275.3 (266.9, 284.2) |
| <b>Serbia</b>                 | 14248 (13727, 14777)    | 125.6 (121.3, 130.1) | 21148 (20392, 21963)    | 171.8 (165.8, 178.2) |
| <b>Slovakia</b>               | 16894 (16384, 17419)    | 294.5 (285.9, 303.3) | 26200 (25305, 27107)    | 349.6 (338.4, 361.2) |
| <b>Slovenia</b>               | 6058 (5899, 6227)       | 254.1 (247.4, 260.7) | 7329 (7083, 7588)       | 235.7 (228.4, 243.3) |
| <b>Central Asia</b>           | 76397 (74602, 78172)    | 130.8 (127.8, 133.8) | 175051 (169931, 180324) | 201.8 (196.1, 207.8) |
| <b>Armenia</b>                | 3729 (3630, 3836)       | 116.2 (113.1, 119.5) | 7143 (6930, 7371)       | 193.5 (187.9, 199.5) |
| <b>Azerbaijan</b>             | 7992 (7763, 8215)       | 129.3 (125.8, 132.9) | 20764 (20046, 21463)    | 196.6 (189.8, 203.1) |
| <b>Georgia</b>                | 8102 (7883, 8314)       | 131.9 (128.5, 135.3) | 9336 (9058, 9628)       | 195.5 (189.7, 201.4) |
| <b>Kazakhstan</b>             | 16445 (15986, 16882)    | 107.4 (104.4, 110.2) | 36511 (35350, 37767)    | 199.3 (193.2, 205.9) |
| <b>Kyrgyzstan</b>             | 5292 (5149, 5430)       | 145.6 (141.9, 149.4) | 11437 (11072, 11798)    | 206 (199.6, 212.2)   |
| <b>Mongolia</b>               | 2065 (2002, 2127)       | 136.4 (132.3, 140.4) | 5236 (5069, 5419)       | 178.4 (172.9, 184.2) |
| <b>Tajikistan</b>             | 5287 (5134, 5446)       | 133.9 (130.2, 137.7) | 14195 (13719, 14686)    | 193.5 (187.1, 199.9) |
| <b>Turkmenistan</b>           | 4072 (3968, 4177)       | 149.5 (145.6, 153.2) | 10207 (9879, 10512)     | 217.5 (210.9, 223.9) |

|                              |                         |                      |                         |                      |
|------------------------------|-------------------------|----------------------|-------------------------|----------------------|
| <b>Uzbekistan</b>            | 23414 (22819, 24022)    | 150.4 (146.6, 154.1) | 60221 (58427, 62202)    | 208.3 (202.4, 214.8) |
| <b>Central Latin America</b> | 160477 (156992, 164009) | 144.6 (141.5, 147.8) | 509311 (494117, 524421) | 206.6 (200.4, 212.6) |
| <b>Colombia</b>              | 20492 (19921, 21045)    | 85.4 (83.1, 87.7)    | 93332 (90050, 96461)    | 174.9 (168.8, 180.7) |
| <b>Costa Rica</b>            | 2557 (2493, 2626)       | 116 (112.8, 119.2)   | 10253 (9914, 10600)     | 204.1 (197.4, 210.9) |
| <b>El Salvador</b>           | 4086 (3977, 4195)       | 112.2 (109, 115.4)   | 10986 (10621, 11354)    | 192 (185.6, 198.5)   |
| <b>Guatemala</b>             | 6351 (6185, 6512)       | 123.4 (120.2, 126.7) | 23327 (22541, 24133)    | 187.1 (180.9, 193.7) |
| <b>Honduras</b>              | 3500 (3387, 3611)       | 121.8 (117.7, 125.5) | 13191 (12717, 13666)    | 189.1 (182.4, 195.9) |
| <b>Mexico</b>                | 105601 (103298, 107904) | 187.3 (183.2, 191.2) | 281656 (272995, 290108) | 228.9 (222.1, 235.6) |
| <b>Nicaragua</b>             | 2595 (2518, 2666)       | 116.2 (112.9, 119.6) | 10302 (9963, 10662)     | 198.3 (191.6, 205.4) |
| <b>Panama</b>                | 1800 (1748, 1852)       | 98.9 (96.1, 102)     | 7373 (7125, 7624)       | 184 (177.9, 190.2)   |
| <b>Venezuela</b>             | 13496 (13168, 13847)    | 102.9 (100.4, 105.7) | 58891 (56750, 61073)    | 192.6 (185.8, 199.6) |
| <b>Andean Latin America</b>  | 18440 (17969, 18919)    | 70.6 (68.9, 72.5)    | 80489 (78332, 82777)    | 142.3 (138.5, 146.5) |
| <b>Bolivia</b>               | 2574 (2493, 2656)       | 60.5 (58.7, 62.5)    | 12514 (12129, 12909)    | 129.1 (125, 133.4)   |
| <b>Ecuador</b>               | 4709 (4590, 4823)       | 68.5 (66.8, 70.2)    | 22211 (21585, 22896)    | 144.3 (140.2, 148.7) |
| <b>Peru</b>                  | 11157 (10855, 11484)    | 74.3 (72.3, 76.3)    | 45765 (44504, 47179)    | 145.3 (141.2, 149.9) |
| <b>Caribbean</b>             | 19775 (19296, 20237)    | 67.7 (66.1, 69.3)    | 54465 (52766, 56260)    | 108.9 (105.6, 112.5) |
| <b>Antigua and Barbuda</b>   | 37 (36, 38)             | 69.5 (67.4, 71.5)    | 114 (111, 118)          | 111.9 (108.5, 115.5) |
| <b>The Bahamas</b>           | 142 (138, 146)          | 73.5 (71.4, 75.8)    | 427 (412, 441)          | 106.3 (103, 109.9)   |
| <b>Barbados</b>              | 172 (168, 177)          | 66 (64, 67.9)        | 455 (439, 471)          | 109.9 (106.3, 113.5) |
| <b>Belize</b>                | 83 (80, 85)             | 69.2 (67.2, 71.2)    | 357 (346, 369)          | 113.1 (109.6, 116.8) |
| <b>Bermuda</b>               | 48 (47, 50)             | 74.8 (72.8, 77.1)    | 124 (120, 128)          | 121.2 (117.3, 125.3) |
| <b>Cuba</b>                  | 6465 (6298, 6641)       | 61.2 (59.6, 62.8)    | 18815 (18174, 19462)    | 115.7 (112, 119.4)   |
| <b>Dominica</b>              | 43 (42, 44)             | 64 (62, 65.9)        | 91 (88, 94)             | 109.4 (105.8, 112.8) |
| <b>Dominican Republic</b>    | 3548 (3453, 3642)       | 73.5 (71.5, 75.6)    | 10926 (10548, 11294)    | 111.9 (108.1, 115.7) |
| <b>Grenada</b>               | 48 (47, 50)             | 68 (66, 70.2)        | 139 (135, 144)          | 106.4 (102.9, 110)   |

|                                         |                            |                      |                            |                      |
|-----------------------------------------|----------------------------|----------------------|----------------------------|----------------------|
| <b>Guyana</b>                           | 393 (382, 404)             | 76 (73.9, 78)        | 711 (687, 736)             | 103.3 (99.9, 106.7)  |
| <b>Haiti</b>                            | 2239 (2163, 2317)          | 51.3 (49.6, 53.1)    | 7495 (7241, 7757)          | 85.5 (82.6, 88.4)    |
| <b>Jamaica</b>                          | 1103 (1073, 1135)          | 57.7 (56, 59.4)      | 3076 (2969, 3186)          | 106.7 (103, 110.5)   |
| <b>Puerto Rico</b>                      | 3729 (3636, 3828)          | 102.2 (99.6, 104.9)  | 6779 (6551, 7017)          | 123.3 (119.2, 127.6) |
| <b>Saint Lucia</b>                      | 74 (72, 76)                | 73.5 (71.4, 75.7)    | 226 (218, 234)             | 110.2 (106.8, 113.9) |
| <b>Saint Vincent and the Grenadines</b> | 53 (51, 54)                | 64 (62.2, 66.1)      | 143 (138, 148)             | 109.6 (106.1, 113.5) |
| <b>Suriname</b>                         | 211 (204, 216)             | 69.7 (67.6, 71.7)    | 647 (626, 670)             | 107.3 (104, 111)     |
| <b>Trinidad and Tobago</b>              | 638 (620, 655)             | 64.5 (62.7, 66.3)    | 1803 (1740, 1864)          | 105.8 (102.1, 109.1) |
| <b>Virgin Islands</b>                   | 73 (70, 75)                | 73 (70.9, 75.1)      | 179 (173, 186)             | 115.6 (111.9, 119.6) |
| <b>Tropical Latin America</b>           | 94178 (91967, 96311)       | 80.0 (78.1, 81.7)    | 216579 (210211, 222811)    | 91.3 (88.7, 93.9)    |
| <b>Brazil</b>                           | 92150 (89987, 94240)       | 80.2 (78.4, 82)      | 210481 (204287, 216507)    | 91.1 (88.5, 93.7)    |
| <b>Paraguay</b>                         | 2028 (1965, 2090)          | 70.3 (68.2, 72.7)    | 6099 (5899, 6303)          | 101.8 (98.4, 105.1)  |
| <b>East Asia</b>                        | 1372763 (1334572, 1411311) | 121.9 (118.6, 125.1) | 2986859 (2886002, 3084172) | 155.1 (150.2, 159.8) |
| <b>China</b>                            | 1317922 (1280743, 1355313) | 123.2 (119.8, 126.5) | 2856264 (2759334, 2949376) | 155.9 (151, 160.7)   |
| <b>North Korea</b>                      | 14405 (13919, 14872)       | 74.3 (71.9, 76.6)    | 37646 (36312, 38959)       | 123.1 (118.9, 127.1) |
| <b>Taiwan (province of China)</b>       | 17567 (17142, 18010)       | 95 (92.7, 97.3)      | 44832 (43409, 46264)       | 134.9 (130.9, 138.9) |
| <b>Southeast Asia</b>                   | 129083 (125528, 132900)    | 36.4 (35.4, 37.4)    | 358408 (346420, 370727)    | 54.2 (52.5, 55.9)    |
| <b>Cambodia</b>                         | 2179 (2116, 2245)          | 31.7 (30.7, 32.7)    | 7188 (6933, 7440)          | 51.9 (50, 53.6)      |
| <b>Indonesia</b>                        | 61169 (59363, 62972)       | 43.7 (42.5, 45)      | 112444 (108525, 116389)    | 45 (43.6, 46.4)      |
| <b>Laos</b>                             | 894 (866, 921)             | 30.5 (29.6, 31.5)    | 2896 (2799, 2997)          | 51.6 (49.9, 53.3)    |
| <b>Malaysia</b>                         | 3781 (3661, 3896)          | 28.1 (27.2, 28.9)    | 16502 (15920, 17075)       | 56.1 (54.3, 58)      |
| <b>Maldives</b>                         | 46 (44, 47)                | 31.6 (30.5, 32.7)    | 258 (248, 268)             | 60.9 (58.9, 63)      |
| <b>Mauritius</b>                        | 357 (346, 367)             | 37.8 (36.8, 38.8)    | 871 (842, 901)             | 55.5 (53.7, 57.2)    |
| <b>Myanmar</b>                          | 9610 (9303, 9902)          | 31.1 (30.1, 32.1)    | 25455 (24525, 26349)       | 49.7 (48, 51.4)      |
| <b>Philippines</b>                      | 7939 (7676, 8190)          | 16.8 (16.3, 17.3)    | 37619 (36069, 39091)       | 41.8 (40.2, 43.4)    |

|                                       |                         |                      |                         |                      |
|---------------------------------------|-------------------------|----------------------|-------------------------|----------------------|
| <b>Sri Lanka</b>                      | 4767 (4628, 4904)       | 33·5 (32·5, 34·5)    | 14000 (13533, 14493)    | 57·4 (55·5, 59·3)    |
| <b>Seychelles</b>                     | 20 (20, 21)             | 33·1 (32·1, 34·2)    | 70 (68, 73)             | 61·8 (59·7, 63·8)    |
| <b>Thailand</b>                       | 15584 (15110, 16088)    | 33 (32, 34)          | 54550 (52692, 56631)    | 59·1 (57·2, 61·1)    |
| <b>East Timor</b>                     | 155 (150, 160)          | 30·2 (29·1, 31·2)    | 525 (509, 543)          | 54·1 (52·2, 56)      |
| <b>Vietnam</b>                        | 22411 (21642, 23244)    | 43·4 (42, 45·1)      | 85558 (81824, 89140)    | 85·4 (82, 88·6)      |
| <b>Oceania</b>                        | 2028 (1966, 2091)       | 40·7 (39·5, 41·9)    | 6387 (6168, 6605)       | 61·6 (59·6, 63·6)    |
| <b>American Samoa</b>                 | 19 (18, 20)             | 50 (48·5, 51·5)      | 42 (41, 44)             | 80·2 (77·5, 82·8)    |
| <b>Federated States of Micronesia</b> | 37 (36, 38)             | 47·6 (45·9, 49·1)    | 66 (64, 68)             | 70·3 (68, 72·8)      |
| <b>Fiji</b>                           | 235 (227, 243)          | 37·8 (36·6, 39)      | 577 (556, 598)          | 65 (62·8, 67·4)      |
| <b>Guam</b>                           | 64 (62, 66)             | 55 (53·3, 56·7)      | 149 (144, 154)          | 82·9 (80·1, 85·5)    |
| <b>Kiribati</b>                       | 26 (26, 27)             | 44·5 (43·1, 45·9)    | 68 (65, 70)             | 67·3 (64·9, 69·6)    |
| <b>Marshall Islands</b>               | 15 (15, 16)             | 47·2 (45·8, 48·8)    | 35 (34, 36)             | 71·5 (69·1, 73·9)    |
| <b>Northern Mariana Islands</b>       | 22 (21, 22)             | 58 (56·2, 59·9)      | 47 (45, 49)             | 84·9 (82·2, 87·6)    |
| <b>Papua New Guinea</b>               | 1206 (1168, 1247)       | 38·4 (37·3, 39·7)    | 4329 (4171, 4488)       | 58·3 (56·3, 60·4)    |
| <b>Samoa</b>                          | 66 (64, 69)             | 53·2 (51·4, 55)      | 142 (137, 147)          | 82·6 (79·9, 85·5)    |
| <b>Solomon Islands</b>                | 108 (104, 111)          | 43·9 (42·5, 45·3)    | 341 (329, 354)          | 66·5 (64·3, 68·8)    |
| <b>Tonga</b>                          | 40 (39, 42)             | 53 (51·5, 54·6)      | 77 (75, 80)             | 83·1 (80·3, 85·9)    |
| <b>Vanuatu</b>                        | 56 (55, 58)             | 49·9 (48·2, 51·6)    | 162 (157, 168)          | 68·8 (66·3, 71·1)    |
| <b>North Africa and Middle East</b>   | 334976 (325704, 344552) | 134·9 (131·4, 138·5) | 799410 (776591, 822307) | 156·2 (151·8, 160·7) |
| <b>Afghanistan</b>                    | 10845 (10470, 11199)    | 126·1 (122, 130)     | 29000 (27997, 30100)    | 139·7 (135·3, 144·2) |
| <b>Algeria</b>                        | 24935 (24196, 25653)    | 138·1 (134·1, 142·3) | 61230 (59326, 63134)    | 167·2 (162, 172·4)   |
| <b>Bahrain</b>                        | 513 (498, 529)          | 150·1 (145·7, 154·7) | 2434 (2346, 2524)       | 176·4 (171, 182)     |
| <b>Egypt</b>                          | 71042 (69048, 73192)    | 181·7 (176·8, 186·6) | 137046 (132768, 141310) | 180·2 (174·9, 185·9) |
| <b>Iran</b>                           | 52004 (50500, 53489)    | 118·9 (115·8, 122·1) | 114950 (111811, 118307) | 145·8 (141·9, 149·8) |
| <b>Iraq</b>                           | 16013 (15503, 16537)    | 130·9 (127·2, 134·7) | 47426 (45958, 48929)    | 142·5 (138·4, 146·7) |

|                                    |                         |                      |                         |                      |
|------------------------------------|-------------------------|----------------------|-------------------------|----------------------|
| <b>Jordan</b>                      | 3667 (3523, 3820)       | 147.9 (142.9, 152.9) | 15434 (14847, 16036)    | 185.3 (178.5, 191.7) |
| <b>Kuwait</b>                      | 1685 (1633, 1738)       | 134 (130.3, 137.7)   | 6449 (6228, 6674)       | 180.8 (175.1, 186.3) |
| <b>Lebanon</b>                     | 4227 (4099, 4351)       | 138.3 (134.1, 142.4) | 12711 (12320, 13117)    | 179.8 (174.1, 185.5) |
| <b>Libya</b>                       | 4118 (3987, 4247)       | 143.9 (139.5, 148.1) | 10164 (9849, 10500)     | 176.8 (171.4, 182.6) |
| <b>Morocco</b>                     | 25057 (24310, 25812)    | 130 (126.2, 133.8)   | 53527 (51889, 55289)    | 157 (152.2, 161.9)   |
| <b>Palestine</b>                   | 1916 (1857, 1980)       | 140 (136, 144.3)     | 5860 (5675, 6048)       | 164.9 (160, 169.8)   |
| <b>Oman</b>                        | 1889 (1829, 1949)       | 150 (145.5, 154.4)   | 5936 (5723, 6144)       | 179 (173.1, 184.7)   |
| <b>Qatar</b>                       | 472 (455, 488)          | 164.7 (159.9, 169.7) | 3992 (3845, 4151)       | 195.9 (189.4, 202.3) |
| <b>Saudi Arabia</b>                | 15844 (15362, 16335)    | 154 (149.4, 158.8)   | 48368 (46733, 50060)    | 186 (180.5, 192)     |
| <b>Sudan</b>                       | 19667 (19025, 20325)    | 139.3 (135.1, 143.5) | 44114 (42730, 45439)    | 160.8 (155.8, 166.1) |
| <b>Syria</b>                       | 11614 (11258, 11996)    | 135.1 (131, 139.1)   | 26080 (25253, 26905)    | 167.7 (162.5, 173)   |
| <b>Tunisia</b>                     | 9118 (8839, 9407)       | 137.7 (133.7, 142)   | 20531 (19883, 21175)    | 168.5 (163.2, 173.5) |
| <b>Turkey</b>                      | 46917 (45291, 48543)    | 103.7 (100.1, 107.2) | 109211 (105489, 113203) | 126.7 (122.4, 131.2) |
| <b>United Arab Emirates</b>        | 1794 (1729, 1858)       | 149.6 (145, 154.3)   | 14631 (14002, 15288)    | 179.2 (173.3, 185.1) |
| <b>Yemen</b>                       | 11424 (11065, 11818)    | 128.8 (124.7, 133)   | 29571 (28623, 30527)    | 144.4 (139.9, 148.9) |
| <b>South Asia</b>                  | 410653 (398707, 422195) | 44.7 (43.5, 45.9)    | 882628 (857168, 908094) | 53.6 (52.1, 55)      |
| <b>Bangladesh</b>                  | 41925 (40618, 43254)    | 49.8 (48.3, 51.2)    | 79002 (76541, 81632)    | 54.2 (52.5, 56)      |
| <b>Bhutan</b>                      | 227 (220, 235)          | 53 (51.4, 54.7)      | 502 (484, 520)          | 58.8 (56.8, 60.8)    |
| <b>India</b>                       | 320134 (310930, 329405) | 43.6 (42.4, 44.8)    | 696047 (676065, 716235) | 53.5 (52, 55)        |
| <b>Nepal</b>                       | 6874 (6651, 7093)       | 44.9 (43.5, 46.3)    | 13622 (13188, 14048)    | 50.9 (49.3, 52.6)    |
| <b>Pakistan</b>                    | 41493 (40173, 42795)    | 48.9 (47.3, 50.3)    | 93454 (90361, 96611)    | 53.6 (51.8, 55.4)    |
| <b>Southern sub-Saharan Africa</b> | 38854 (37795, 40030)    | 93.5 (91.1, 96)      | 57200 (55565, 58859)    | 82.7 (80.4, 85)      |
| <b>Botswana</b>                    | 761 (738, 787)          | 77.9 (75.5, 80.3)    | 1649 (1600, 1704)       | 85.9 (83.4, 88.8)    |
| <b>eSwatini</b>                    | 458 (444, 474)          | 80.4 (78, 82.8)      | 729 (705, 755)          | 82.7 (80.2, 85.5)    |
| <b>Lesotho</b>                     | 1172 (1135, 1213)       | 80.5 (78.1, 83.1)    | 1298 (1255, 1341)       | 79.5 (76.9, 82.1)    |

|                                   |                         |                      |                         |                      |
|-----------------------------------|-------------------------|----------------------|-------------------------|----------------------|
| <b>Namibia</b>                    | 699 (676, 723)          | 63.8 (61.8, 65.8)    | 1499 (1453, 1548)       | 77.4 (74.9, 80)      |
| <b>South Africa</b>               | 28673 (27897, 29587)    | 95.7 (93.2, 98.4)    | 41851 (40679, 43038)    | 81.5 (79.3, 83.8)    |
| <b>Zimbabwe</b>                   | 7091 (6858, 7332)       | 94.5 (91.8, 97.2)    | 10174 (9845, 10524)     | 89.6 (86.8, 92.3)    |
| <b>Western sub-Saharan Africa</b> | 190794 (185667, 195881) | 142.0 (138.1, 146)   | 431691 (419424, 445004) | 147.5 (143.3, 151.9) |
| <b>Benin</b>                      | 4825 (4679, 4978)       | 148.4 (144, 153)     | 12096 (11751, 12490)    | 155.4 (150.9, 160.1) |
| <b>Burkina Faso</b>               | 11647 (11306, 11999)    | 170.1 (165.2, 174.6) | 23702 (22948, 24521)    | 164.6 (159.1, 170.2) |
| <b>Cameroon</b>                   | 9717 (9420, 10005)      | 137 (133.1, 141.1)   | 26976 (26104, 27866)    | 142.7 (138.3, 147.3) |
| <b>Cape Verde</b>                 | 410 (398, 421)          | 151.9 (147.4, 156.4) | 791 (768, 816)          | 163.4 (158.6, 168.4) |
| <b>Chad</b>                       | 6773 (6556, 7001)       | 158.6 (153.8, 163.5) | 14996 (14511, 15530)    | 155.2 (150.4, 160.2) |
| <b>Côte d'Ivoire</b>              | 10693 (10357, 11034)    | 135.4 (131.4, 139.5) | 24565 (23785, 25403)    | 141.9 (137.6, 146.8) |
| <b>The Gambia</b>                 | 972 (941, 1003)         | 151.4 (146.7, 156.2) | 2341 (2271, 2414)       | 159 (154.2, 164)     |
| <b>Ghana</b>                      | 12891 (12509, 13260)    | 125.3 (121.7, 129)   | 31251 (30252, 32281)    | 138.8 (134.3, 143.2) |
| <b>Guinea</b>                     | 6785 (6587, 6999)       | 147.3 (142.9, 151.9) | 12106 (11731, 12520)    | 148 (143.5, 152.6)   |
| <b>Guinea-Bissau</b>              | 1011 (981, 1042)        | 145.9 (141.5, 150.5) | 1797 (1739, 1853)       | 143.5 (139.2, 147.9) |
| <b>Liberia</b>                    | 2412 (2340, 2486)       | 159.5 (155, 164.4)   | 5429 (5258, 5607)       | 166.5 (161.4, 172)   |
| <b>Mali</b>                       | 10712 (10382, 11047)    | 172.6 (167.5, 177.6) | 24654 (23845, 25478)    | 182.8 (177, 188.8)   |
| <b>Mauritania</b>                 | 2082 (2022, 2147)       | 140.8 (136.5, 145.2) | 4382 (4252, 4520)       | 154 (149.5, 159.1)   |
| <b>Niger</b>                      | 8919 (8636, 9208)       | 169 (164, 174.1)     | 23960 (23141, 24828)    | 177.8 (172.3, 183.5) |
| <b>Nigeria</b>                    | 84733 (82316, 87208)    | 133.6 (129.5, 137.5) | 189264 (183555, 195508) | 139.6 (135.1, 144.2) |
| <b>São Tomé and Príncipe</b>      | 156 (152, 161)          | 175.7 (170.8, 180.8) | 265 (257, 274)          | 178.7 (173.1, 184.5) |
| <b>Senegal</b>                    | 7538 (7310, 7776)       | 144.4 (139.9, 148.8) | 16487 (15924, 17013)    | 155.6 (150.5, 160.5) |
| <b>Sierra Leone</b>               | 5062 (4915, 5222)       | 181.9 (176.6, 187.5) | 8663 (8381, 8943)       | 159.9 (154.8, 165)   |
| <b>Togo</b>                       | 3449 (3340, 3560)       | 145.9 (141.5, 150)   | 7963 (7704, 8232)       | 146.3 (141.7, 151.2) |
| <b>Eastern sub-Saharan Africa</b> | 147505 (143344, 151841) | 122.7 (119.4, 126.1) | 323090 (313747, 332844) | 128.6 (124.8, 132.4) |
| <b>Burundi</b>                    | 4105 (3979, 4237)       | 118.3 (114.7, 121.8) | 8445 (8162, 8729)       | 122.3 (118.3, 126.6) |

|                                   |                      |                      |                         |                      |
|-----------------------------------|----------------------|----------------------|-------------------------|----------------------|
| <b>Comoros</b>                    | 374 (362, 386)       | 122.7 (118.9, 126.6) | 757 (732, 783)          | 132.4 (127.9, 136.9) |
| <b>Djibouti</b>                   | 366 (355, 378)       | 124.6 (121.1, 128.2) | 1155 (1120, 1192)       | 139.3 (134.9, 143.8) |
| <b>Eritrea</b>                    | 1963 (1900, 2032)    | 112.7 (109.1, 116.4) | 4573 (4430, 4719)       | 119.8 (116.2, 123.6) |
| <b>Ethiopia</b>                   | 39336 (38213, 40496) | 121.4 (117.9, 124.8) | 83981 (81606, 86419)    | 127.7 (124.1, 131.2) |
| <b>Kenya</b>                      | 18071 (17588, 18593) | 134 (130.3, 137.7)   | 43088 (41872, 44383)    | 134.5 (130.7, 138.5) |
| <b>Madagascar</b>                 | 9605 (9296, 9908)    | 123.1 (119.3, 126.9) | 21840 (21110, 22573)    | 128.9 (124.8, 133)   |
| <b>Malawi</b>                     | 7971 (7728, 8235)    | 128.2 (124.3, 132.2) | 14801 (14327, 15275)    | 132.5 (128.4, 136.9) |
| <b>Mozambique</b>                 | 10827 (10492, 11165) | 112.3 (109, 115.8)   | 23480 (22729, 24310)    | 127.2 (123.3, 131.5) |
| <b>Rwanda</b>                     | 6311 (6116, 6502)    | 138.3 (134.1, 142.5) | 11283 (10929, 11650)    | 131.9 (127.7, 136.5) |
| <b>Somalia</b>                    | 5202 (5035, 5382)    | 114.2 (110.5, 117.8) | 13133 (12691, 13557)    | 123.3 (119.1, 127.2) |
| <b>South Sudan</b>                | 4975 (4817, 5147)    | 131.6 (127.5, 136.3) | 8608 (8335, 8904)       | 136.9 (132.7, 141.5) |
| <b>Tanzania</b>                   | 19973 (19384, 20586) | 120 (116.6, 123.6)   | 45878 (44344, 47464)    | 129.1 (124.9, 133.6) |
| <b>Uganda</b>                     | 12490 (12098, 12875) | 117.7 (113.8, 121.2) | 28877 (27948, 29860)    | 123.8 (119.8, 127.8) |
| <b>Zambia</b>                     | 5862 (5673, 6032)    | 123.9 (120.2, 127.6) | 12988 (12580, 13373)    | 120.9 (117.3, 124.6) |
| <b>Central sub-Saharan Africa</b> | 46006 (44566, 47414) | 123.2 (119.5, 126.9) | 110747 (107304, 114290) | 131.8 (127.8, 136.1) |
| <b>Angola</b>                     | 8796 (8504, 9099)    | 129.1 (124.8, 133.4) | 24850 (24063, 25688)    | 133.5 (129.4, 137.9) |
| <b>Central African Republic</b>   | 1991 (1928, 2061)    | 104.8 (101.6, 108.2) | 3725 (3606, 3852)       | 110.6 (107, 114)     |
| <b>Congo</b>                      | 1775 (1719, 1836)    | 105.9 (102.6, 109.5) | 4329 (4192, 4471)       | 115.7 (112.1, 119.3) |
| <b>DR Congo</b>                   | 32241 (31192, 33271) | 124.4 (120.5, 128.4) | 74998 (72498, 77555)    | 133.9 (129.6, 138.5) |
| <b>Equatorial Guinea</b>          | 339 (328, 351)       | 113.3 (109.9, 117.1) | 1145 (1108, 1182)       | 133.9 (129.6, 138.5) |
| <b>Gabon</b>                      | 863 (839, 889)       | 117.3 (113.9, 120.9) | 1699 (1645, 1753)       | 123.9 (120, 127.9)   |



**Appendix Table 6: Prevalent cases and age-standardised prevalence rates of compensated cirrhosis per 100 000 in 1990 and 2017 for both sexes combined by location**

|                                  | 1990                             |                            | 2017                                |                            |
|----------------------------------|----------------------------------|----------------------------|-------------------------------------|----------------------------|
|                                  | Counts (95% UI)                  | Rate (95% UI)              | Counts (95% UI)                     | Rate (95% UI)              |
| <b>Global</b>                    | 65947703<br>(63387294, 68744980) | 1354.5<br>(1300.6, 1411.7) | 112363787<br>(106563283, 118533648) | 1395.0<br>(1323.5, 1470.5) |
| <b>High-income North America</b> | 1154736 (1096397, 1210694)       | 361.9 (344.5, 379.3)       | 1827033 (1726898, 1923029)          | 372.2 (352.9, 391.6)       |
| <b>Canada</b>                    | 92868 (87394, 98463)             | 295.7 (278.2, 313.3)       | 159085 (146793, 170963)             | 309.2 (286.3, 331.8)       |
| <b>Greenland</b>                 | 135 (126, 145)                   | 253.1 (235.8, 270)         | 203 (186, 219)                      | 291.5 (268.8, 313.9)       |
| <b>USA</b>                       | 1061707 (1008400, 1111883)       | 369.3 (351.2, 387.4)       | 1667713 (1577300, 1753150)          | 379.6 (360.3, 399)         |
| <b>Australasia</b>               | 116360 (111434, 121772)          | 531.6 (509.7, 556.7)       | 189719 (178728, 200928)             | 563.1 (531.2, 596.2)       |
| <b>Australia</b>                 | 94668 (90391, 99125)             | 516.8 (493.7, 541.4)       | 157920 (148408, 167724)             | 553.4 (521.3, 586.8)       |
| <b>New Zealand</b>               | 21692 (20639, 22801)             | 603.6 (574.5, 634)         | 31798 (29961, 33692)                | 615.4 (582.2, 652.6)       |
| <b>High-income Asia Pacific</b>  | 5935372 (5737229, 6139500)       | 3077.8 (2972.9, 3186.6)    | 5682247 (5406606, 5967781)          | 2455 (2344.9, 2575.8)      |
| <b>Brunei</b>                    | 4736 (4489, 4983)                | 2047 (1945.3, 2152.7)      | 10203 (9652, 10802)                 | 2245.6 (2122.1, 2374.3)    |
| <b>Japan</b>                     | 3865916 (3724253, 4011413)       | 2658.4 (2559.7, 2760)      | 3871612 (3677934, 4067292)          | 2443.7 (2332, 2566.2)      |
| <b>Singapore</b>                 | 62582 (59762, 65414)             | 1914.3 (1829, 2000.6)      | 122654 (116059, 129680)             | 1919.3 (1812.4, 2029.8)    |
| <b>South Korea</b>               | 2002138 (1928253, 2075664)       | 4607.5 (4448.7, 4775.8)    | 1677778 (1589127, 1762453)          | 2537.9 (2410.8, 2663.2)    |
| <b>Western Europe</b>            | 6573349 (6365747, 6785623)       | 1460.5 (1414.9, 1507.4)    | 7937663 (7525465, 8362885)          | 1456.5 (1386.3, 1532.8)    |
| <b>Andorra</b>                   | 740 (699, 782)                   | 1170.1 (1105.3, 1234.5)    | 1461 (1366, 1557)                   | 1350.8 (1267.2, 1435.2)    |
| <b>Austria</b>                   | 186235 (177073, 202887)          | 2063.2 (1964.5, 2233.4)    | 217276 (206472, 228148)             | 1928.2 (1834.2, 2021.7)    |
| <b>Belgium</b>                   | 143455 (137343, 149491)          | 1214.3 (1165, 1265.5)      | 187650 (177533, 199532)             | 1340.1 (1273.2, 1419.8)    |
| <b>Cyprus</b>                    | 6674 (6316, 7098)                | 819.3 (775.5, 871.1)       | 13457 (12618, 14352)                | 859.6 (808.7, 915.7)       |
| <b>Denmark</b>                   | 60076 (57400, 62646)             | 996.8 (953.3, 1038.8)      | 104205 (98494, 110338)              | 1493.6 (1416.4, 1578.4)    |
| <b>Finland</b>                   | 55593 (53044, 58199)             | 944.5 (901, 987.4)         | 100549 (94983, 106593)              | 1493.5 (1417.9, 1578.9)    |
| <b>France</b>                    | 1002131 (963491, 1041081)        | 1524.9 (1467.5, 1581)      | 1037465 (976855, 1102260)           | 1315.6 (1244.7, 1394.7)    |

|                               |                            |                         |                            |                         |
|-------------------------------|----------------------------|-------------------------|----------------------------|-------------------------|
| <b>Germany</b>                | 1407397 (1359942, 1458831) | 1447.4 (1399, 1497.8)   | 1822601 (1721917, 1925840) | 1688.9 (1604.4, 1780.8) |
| <b>Greece</b>                 | 149473 (143019, 155967)    | 1222.6 (1171.2, 1274.4) | 154483 (145125, 163799)    | 1155.9 (1091, 1224.9)   |
| <b>Iceland</b>                | 1493 (1418, 1574)          | 569.9 (541.7, 600.5)    | 3845 (3598, 4116)          | 989.8 (927.8, 1057.1)   |
| <b>Ireland</b>                | 26358 (25114, 27580)       | 725.2 (691.4, 758.5)    | 65846 (62068, 70158)       | 1150.1 (1089.3, 1223.7) |
| <b>Israel</b>                 | 46249 (44225, 48312)       | 978.9 (936.4, 1021.9)   | 108697 (102718, 115613)    | 1174.7 (1111.2, 1249)   |
| <b>Italy</b>                  | 1516088 (1458470, 1574971) | 2214.6 (2133, 2299.2)   | 1536168 (1449451, 1627198) | 1913.1 (1813.6, 2020.2) |
| <b>Luxembourg</b>             | 8515 (8101, 8910)          | 1820.1 (1735.6, 1901.7) | 14675 (13821, 15616)       | 1959.8 (1851.8, 2076.2) |
| <b>Malta</b>                  | 2964 (2835, 3102)          | 710.9 (680.8, 743.7)    | 4261 (4015, 4537)          | 778.5 (736.5, 826)      |
| <b>Netherlands</b>            | 164390 (156881, 171932)    | 952.4 (909.3, 993.8)    | 240863 (225842, 256941)    | 1140.4 (1070.4, 1213.4) |
| <b>Norway</b>                 | 54885 (52314, 57613)       | 1151.1 (1099.4, 1208.5) | 82893 (78376, 87776)       | 1342.9 (1272.6, 1420.6) |
| <b>Portugal</b>               | 185171 (177854, 192518)    | 1615.2 (1553.1, 1675.5) | 140174 (130895, 150925)    | 1016.1 (952.8, 1087.7)  |
| <b>Spain</b>                  | 764499 (739809, 796968)    | 1723.7 (1667.2, 1796.2) | 818843 (773592, 866632)    | 1349.1 (1278.1, 1426)   |
| <b>Sweden</b>                 | 108747 (103929, 114142)    | 1089.3 (1043.3, 1141)   | 189524 (179584, 200883)    | 1585.6 (1501.7, 1677.9) |
| <b>Switzerland</b>            | 76043 (72534, 79387)       | 916 (875.3, 954.8)      | 109487 (103284, 115938)    | 1002 (947.7, 1058.8)    |
| <b>UK</b>                     | 599834 (573566, 627191)    | 919.9 (881.4, 961.4)    | 975013 (927753, 1027361)   | 1213.1 (1156.5, 1277.1) |
| <b>Southern Latin America</b> | 629728 (607657, 652050)    | 1316.0 (1270.1, 1361.7) | 1120623 (1060773, 1178396) | 1540.2 (1459.1, 1619.7) |
| <b>Argentina</b>              | 378756 (364178, 394330)    | 1164.9 (1119.6, 1212.7) | 692909 (652322, 730989)    | 1453.5 (1369.3, 1533.2) |
| <b>Chile</b>                  | 217791 (209852, 225667)    | 1823.3 (1756.6, 1886.1) | 377096 (357774, 395943)    | 1779.7 (1690.5, 1866.9) |
| <b>Uruguay</b>                | 33155 (31714, 34473)       | 996.2 (953.2, 1035.3)   | 50569 (47620, 53607)       | 1287.1 (1216.1, 1364.2) |
| <b>Eastern Europe</b>         | 3854642 (3697193, 4020387) | 1556.2 (1493.4, 1625.4) | 5719309 (5454966, 6010972) | 2283.4 (2183.2, 2395.8) |
| <b>Belarus</b>                | 155158 (147517, 163877)    | 1370.5 (1301.3, 1448.2) | 231686 (218482, 245417)    | 2031.3 (1919.6, 2147.5) |
| <b>Estonia</b>                | 22994 (21794, 24263)       | 1341.7 (1269.9, 1417.3) | 29954 (28164, 31895)       | 1920 (1811.4, 2041)     |
| <b>Latvia</b>                 | 38188 (36226, 40113)       | 1275.6 (1210, 1341.2)   | 42232 (39895, 45039)       | 1816.2 (1720.9, 1928.8) |
| <b>Lithuania</b>              | 59773 (56939, 62973)       | 1482.2 (1411.8, 1558.6) | 75555 (71289, 80029)       | 2234 (2115.8, 2363.3)   |
| <b>Moldova</b>                | 155473 (149690, 161584)    | 3388.5 (3264.6, 3520.1) | 137489 (130242, 145196)    | 3000.4 (2842.8, 3166.4) |

|                               |                            |                         |                            |                         |
|-------------------------------|----------------------------|-------------------------|----------------------------|-------------------------|
| <b>Russia</b>                 | 2505834 (2392741, 2621703) | 1521·2 (1454·3, 1591·8) | 3913270 (3730449, 4116688) | 2252·7 (2147·3, 2364·8) |
| <b>Ukraine</b>                | 917222 (877590, 961069)    | 1579·9 (1511·8, 1659·1) | 1289123 (1225960, 1356217) | 2411·2 (2296·9, 2532·6) |
| <b>Central Europe</b>         | 2730726 (2631165, 2826082) | 2022·5 (1946·4, 2094·8) | 2906876 (2764240, 3059980) | 2084·2 (1985·9, 2194·2) |
| <b>Albania</b>                | 46455 (44070, 48947)       | 1568·4 (1489·1, 1651·7) | 57096 (53416, 61071)       | 1822·5 (1709·5, 1945)   |
| <b>Bosnia and Herzegovina</b> | 84451 (80578, 88507)       | 1773·9 (1691, 1859·5)   | 74800 (70112, 79502)       | 1814·6 (1702·2, 1930·6) |
| <b>Bulgaria</b>               | 178219 (170682, 186155)    | 1751·4 (1677·3, 1831·4) | 170043 (160543, 180226)    | 1952·4 (1848·9, 2068·5) |
| <b>Croatia</b>                | 135481 (129555, 140891)    | 2391·3 (2286·2, 2488·7) | 102365 (96894, 107835)     | 1933·5 (1838·7, 2030·1) |
| <b>Czech Republic</b>         | 188404 (179890, 197180)    | 1636 (1562·3, 1710·4)   | 224091 (211882, 236432)    | 1719·2 (1629·8, 1810)   |
| <b>Hungary</b>                | 336374 (323867, 349023)    | 2814·2 (2708·4, 2920)   | 237847 (225842, 250524)    | 1996·9 (1896·4, 2104·8) |
| <b>Montenegro</b>             | 8239 (7796, 8703)          | 1274·7 (1206·4, 1347·1) | 11328 (10641, 12108)       | 1566·3 (1475·4, 1670·1) |
| <b>North Macedonia</b>        | 28293 (26857, 29853)       | 1369·6 (1299·4, 1445·8) | 42021 (39456, 44748)       | 1630·7 (1533·5, 1735·2) |
| <b>Poland</b>                 | 737923 (706816, 773942)    | 1775·7 (1699·9, 1862·1) | 1007331 (948109, 1073134)  | 2181 (2055·7, 2318·5)   |
| <b>Romania</b>                | 654328 (630293, 678960)    | 2580·5 (2485·4, 2679·8) | 617146 (585947, 649790)    | 2554·9 (2425·4, 2686·1) |
| <b>Serbia</b>                 | 117244 (111300, 123646)    | 1117·5 (1060·8, 1178)   | 127244 (119744, 135155)    | 1216·7 (1148·9, 1288·9) |
| <b>Slovakia</b>               | 158560 (151216, 166466)    | 2845·8 (2713·9, 2988·2) | 186083 (174800, 197064)    | 2828·6 (2672, 2989)     |
| <b>Slovenia</b>               | 56755 (54506, 59152)       | 2521·2 (2421·3, 2622·3) | 49482 (46520, 52357)       | 1902·1 (1799·1, 2013)   |
| <b>Central Asia</b>           | 756000 (725504, 787983)    | 1229·3 (1181·1, 1280·7) | 1443250 (1360853, 1529019) | 1550·8 (1464·2, 1641·5) |
| <b>Armenia</b>                | 31056 (29437, 32730)       | 935·5 (888·4, 984·5)    | 42999 (40318, 45831)       | 1259·1 (1183, 1341·9)   |
| <b>Azerbaijan</b>             | 77753 (73920, 81989)       | 1185·6 (1130·3, 1247·5) | 152614 (142680, 163415)    | 1365·5 (1278·5, 1459·5) |
| <b>Georgia</b>                | 65685 (62683, 68752)       | 1127·7 (1078·2, 1180·4) | 51727 (45879, 55480)       | 1241·4 (1097·6, 1335·9) |
| <b>Kazakhstan</b>             | 155573 (148069, 163541)    | 968·6 (924·4, 1016·4)   | 291051 (273420, 309384)    | 1541·4 (1450·1, 1636·7) |
| <b>Kyrgyzstan</b>             | 53407 (50906, 56141)       | 1417·8 (1351·8, 1488·2) | 99282 (93598, 104876)      | 1622 (1527·9, 1713·8)   |
| <b>Mongolia</b>               | 25902 (24463, 27483)       | 1557·4 (1465·6, 1650)   | 51643 (48431, 55101)       | 1524·4 (1427·6, 1625·5) |
| <b>Tajikistan</b>             | 53057 (50189, 55934)       | 1237·6 (1177·7, 1300·3) | 116479 (109406, 124543)    | 1371 (1290·3, 1459·9)   |
| <b>Turkmenistan</b>           | 44996 (42899, 47206)       | 1512·5 (1445·4, 1580·7) | 94340 (89182, 100192)      | 1841·6 (1740·5, 1954·7) |

|                              |                            |                         |                            |                         |
|------------------------------|----------------------------|-------------------------|----------------------------|-------------------------|
| <b>Uzbekistan</b>            | 248570 (237337, 260450)    | 1474.5 (1408.9, 1538.7) | 543115 (512595, 576273)    | 1677.3 (1584.3, 1778.9) |
| <b>Central Latin America</b> | 2407025 (2328935, 2482875) | 2043.3 (1975.9, 2108.5) | 5758402 (5492758, 6038576) | 2272.3 (2167, 2383.4)   |
| <b>Colombia</b>              | 275131 (262397, 288247)    | 1097 (1045.8, 1151)     | 768374 (725745, 814359)    | 1449.6 (1368.8, 1537.3) |
| <b>Costa Rica</b>            | 33145 (31604, 34671)       | 1439 (1372.6, 1502)     | 97787 (92047, 103527)      | 1926.8 (1814.9, 2039.7) |
| <b>El Salvador</b>           | 63119 (60412, 65845)       | 1676.8 (1600.8, 1750.3) | 130665 (122684, 138734)    | 2257.2 (2116.2, 2397.7) |
| <b>Guatemala</b>             | 112089 (107789, 116154)    | 2078.9 (1998.1, 2154.3) | 340447 (323388, 357795)    | 2546.8 (2415.2, 2673.1) |
| <b>Honduras</b>              | 62969 (60080, 66032)       | 2103.1 (2000.5, 2209.4) | 186521 (174926, 199500)    | 2522.2 (2363.1, 2696.9) |
| <b>Mexico</b>                | 1605519 (1556102, 1653391) | 2673 (2589.6, 2753.7)   | 3508527 (3346555, 3663839) | 2749.8 (2621.8, 2873)   |
| <b>Nicaragua</b>             | 36838 (35155, 38513)       | 1574.3 (1500.9, 1650)   | 113341 (107193, 120129)    | 2045.3 (1936.4, 2165.5) |
| <b>Panama</b>                | 22826 (21730, 23973)       | 1201.4 (1141.5, 1263.7) | 65217 (61628, 69011)       | 1621.8 (1531.9, 1716)   |
| <b>Venezuela</b>             | 195388 (186276, 204230)    | 1398.2 (1336.9, 1462.1) | 547522 (515425, 581984)    | 1726.8 (1626.3, 1836.4) |
| <b>Andean Latin America</b>  | 346704 (332166, 361643)    | 1180.4 (1131, 1230.3)   | 906156 (855141, 956163)    | 1541.4 (1454.5, 1626.6) |
| <b>Bolivia</b>               | 53163 (50202, 56074)       | 1123.1 (1059.6, 1184.9) | 164191 (153407, 174544)    | 1592.7 (1486.6, 1694)   |
| <b>Ecuador</b>               | 86626 (83179, 90451)       | 1115.9 (1071.2, 1161.8) | 251822 (237720, 265106)    | 1572.1 (1482.1, 1655.7) |
| <b>Peru</b>                  | 206914 (197255, 216573)    | 1225.2 (1169.6, 1282.3) | 490143 (462360, 518680)    | 1510.4 (1424.2, 1598.1) |
| <b>Caribbean</b>             | 303268 (290337, 316180)    | 1004.6 (960.6, 1047.3)  | 615530 (579170, 653381)    | 1240.3 (1167.6, 1315.1) |
| <b>Antigua and Barbuda</b>   | 506 (481, 532)             | 955.5 (909.2, 1005.2)   | 1193 (1120, 1267)          | 1147.2 (1076.5, 1217.7) |
| <b>The Bahamas</b>           | 2400 (2280, 2520)          | 1124.3 (1068.7, 1183.1) | 5152 (4838, 5458)          | 1220.7 (1145.3, 1292)   |
| <b>Barbados</b>              | 2165 (2055, 2282)          | 853.6 (811.5, 898.5)    | 4059 (3806, 4311)          | 1072.2 (1004.6, 1141.8) |
| <b>Belize</b>                | 1273 (1206, 1338)          | 1035.5 (983.7, 1088.7)  | 4753 (4475, 5025)          | 1360.8 (1280.4, 1437.4) |
| <b>Bermuda</b>               | 616 (585, 648)             | 917.9 (871.8, 964.9)    | 980 (917, 1045)            | 1074.4 (1005.8, 1145.2) |
| <b>Cuba</b>                  | 84755 (80232, 89218)       | 788 (746.3, 829.1)      | 172531 (162016, 183393)    | 1148.8 (1079.9, 1219.3) |
| <b>Dominica</b>              | 547 (520, 575)             | 856.6 (814.2, 900.3)    | 883 (828, 938)             | 1124.9 (1057.5, 1197.3) |
| <b>Dominican Republic</b>    | 65224 (62029, 68559)       | 1238.6 (1175.1, 1302.7) | 137410 (127918, 146575)    | 1339.3 (1247.7, 1428.1) |
| <b>Grenada</b>               | 701 (666, 736)             | 1039.9 (986, 1093)      | 1403 (1319, 1489)          | 1152.7 (1084.8, 1222.6) |

|                                         |                               |                         |                               |                         |
|-----------------------------------------|-------------------------------|-------------------------|-------------------------------|-------------------------|
| <b>Guyana</b>                           | 7742 (7355, 8129)             | 1363.2 (1294.8, 1431)   | 10551 (9919, 11185)           | 1447.7 (1360.6, 1534.8) |
| <b>Haiti</b>                            | 43781 (41031, 46325)          | 940.1 (878.8, 995.8)    | 127756 (118621, 137171)       | 1287.4 (1194, 1376)     |
| <b>Jamaica</b>                          | 13991 (13317, 14739)          | 731.5 (696.4, 771.3)    | 29899 (28003, 31839)          | 1023.7 (958.1, 1090.3)  |
| <b>Puerto Rico</b>                      | 52710 (50345, 55141)          | 1455.7 (1391.1, 1522.6) | 64057 (60254, 67743)          | 1351.7 (1273, 1430.5)   |
| <b>Saint Lucia</b>                      | 1116 (1059, 1170)             | 1103.9 (1046.3, 1159.2) | 2459 (2313, 2615)             | 1194.7 (1125.3, 1270.3) |
| <b>Saint Vincent and the Grenadines</b> | 724 (685, 763)                | 884.9 (839.5, 931.1)    | 1450 (1365, 1543)             | 1135.3 (1068.1, 1206.5) |
| <b>Suriname</b>                         | 3647 (3476, 3821)             | 1143.6 (1088.9, 1198.9) | 8444 (7938, 8980)             | 1366.3 (1284.3, 1452.9) |
| <b>Trinidad and Tobago</b>              | 9826 (9339, 10293)            | 946.9 (900, 992.9)      | 18573 (17397, 19845)          | 1115.6 (1046.6, 1192.3) |
| <b>Virgin Islands</b>                   | 1164 (1103, 1226)             | 1087.9 (1029.9, 1145.7) | 1841 (1723, 1959)             | 1346 (1263.6, 1429.1)   |
| <b>Tropical Latin America</b>           | 1358901 (1303250, 1415474)    | 1071.6 (1026.8, 1115.8) | 2464317 (2338368, 2589457)    | 1010.2 (959.2, 1060.4)  |
| <b>Brazil</b>                           | 1335400 (1280809, 1391331)    | 1078.4 (1033.4, 1122.7) | 2401071 (2278151, 2521879)    | 1010.5 (959.5, 1060.6)  |
| <b>Paraguay</b>                         | 23502 (22123, 24985)          | 790 (743.4, 838.9)      | 63246 (58691, 67668)          | 1001.9 (930.3, 1073.7)  |
| <b>East Asia</b>                        | 22340734 (21365407, 23435590) | 1901.3 (1813.9, 1993.1) | 38719143 (36466683, 41091034) | 2012.9 (1904.7, 2131.4) |
| <b>China</b>                            | 21124232 (20197693, 22183413) | 1892.9 (1805.2, 1985.4) | 36435366 (34297849, 38673072) | 1991.4 (1883.1, 2109.9) |
| <b>North Korea</b>                      | 326833 (310108, 344844)       | 1631.1 (1546.5, 1720.1) | 720873 (678581, 769035)       | 2328.6 (2193.1, 2480.9) |
| <b>Taiwan (province of China)</b>       | 517467 (498332, 539344)       | 2618.4 (2517.2, 2723.3) | 939161 (891939, 985827)       | 2913.7 (2772.9, 3052.9) |
| <b>Southeast Asia</b>                   | 1823474 (1724938, 1923879)    | 480.8 (454.5, 507.2)    | 3952897 (3686888, 4214112)    | 563.8 (527.4, 600.1)    |
| <b>Cambodia</b>                         | 38407 (36301, 40692)          | 534.5 (503.6, 567.1)    | 101098 (94235, 108234)        | 684 (635.6, 732.6)      |
| <b>Indonesia</b>                        | 887611 (837110, 936420)       | 582.5 (549.4, 615.7)    | 1351031 (1259164, 1443368)    | 498.4 (466, 530.7)      |
| <b>Laos</b>                             | 13071 (12269, 13861)          | 430.5 (403.4, 458.5)    | 36250 (33649, 38696)          | 587.1 (543.9, 628.5)    |
| <b>Malaysia</b>                         | 43224 (40791, 45799)          | 300.7 (284.2, 317.8)    | 141440 (132094, 151404)       | 456.4 (426.1, 487.9)    |
| <b>Maldives</b>                         | 469 (439, 500)                | 308.3 (289.3, 327.6)    | 2097 (1958, 2252)             | 441.6 (413.4, 471.7)    |
| <b>Mauritius</b>                        | 4828 (4591, 5067)             | 481.8 (458.3, 505.8)    | 7342 (6889, 7785)             | 470.5 (442, 499.4)      |
| <b>Myanmar</b>                          | 174939 (163660, 185798)       | 538.2 (501.6, 571.9)    | 348334 (324296, 372609)       | 637.6 (593.8, 681.4)    |

|                                       |                            |                         |                            |                         |
|---------------------------------------|----------------------------|-------------------------|----------------------------|-------------------------|
| <b>Philippines</b>                    | 94782 (90211, 100050)      | 190.4 (181.8, 200.3)    | 315388 (285703, 337295)    | 328.4 (298.4, 351.3)    |
| <b>Sri Lanka</b>                      | 63101 (59678, 66745)       | 412.9 (390.3, 437.2)    | 123707 (115201, 132477)    | 509.7 (475.2, 544.3)    |
| <b>Seychelles</b>                     | 243 (229, 257)             | 396.8 (373.7, 418.4)    | 687 (639, 738)             | 576.5 (538.5, 615.8)    |
| <b>Thailand</b>                       | 202020 (189893, 213441)    | 391.7 (368.4, 413.6)    | 478903 (447270, 510156)    | 524 (490.5, 556.6)      |
| <b>East Timor</b>                     | 2154 (2012, 2294)          | 376.2 (352.1, 401.5)    | 5673 (5261, 6081)          | 575.3 (530.1, 617.5)    |
| <b>Vietnam</b>                        | 296204 (278108, 313701)    | 569.2 (533.3, 602.5)    | 1035745 (960564, 1107096)  | 973.5 (904.2, 1038.3)   |
| <b>Oceania</b>                        | 37308 (35252, 39481)       | 719.7 (682.5, 760.2)    | 95922 (89911, 102404)      | 861.8 (807.5, 917.5)    |
| <b>American Samoa</b>                 | 260 (247, 276)             | 664.1 (629.3, 702.8)    | 427 (400, 456)             | 799.3 (750, 854.7)      |
| <b>Federated States of Micronesia</b> | 639 (601, 680)             | 824.7 (775.8, 875.1)    | 868 (811, 928)             | 888.8 (829.6, 951)      |
| <b>Fiji</b>                           | 3246 (3069, 3445)          | 497.9 (471.3, 527.1)    | 6368 (5973, 6789)          | 696.4 (652.6, 742.3)    |
| <b>Guam</b>                           | 1070 (1012, 1131)          | 852.5 (807, 900.6)      | 1639 (1542, 1738)          | 926.9 (873, 984.5)      |
| <b>Kiribati</b>                       | 487 (457, 517)             | 798.7 (749.4, 846.8)    | 1000 (931, 1071)           | 949.4 (883.4, 1015.4)   |
| <b>Marshall Islands</b>               | 267 (251, 283)             | 841.7 (792.7, 892.1)    | 495 (462, 531)             | 942.8 (880.1, 1011.3)   |
| <b>Northern Mariana Islands</b>       | 356 (336, 378)             | 834.1 (790.6, 881.5)    | 487 (455, 519)             | 904.2 (846.4, 962.8)    |
| <b>Papua New Guinea</b>               | 23982 (22640, 25436)       | 736.9 (696.5, 779.5)    | 69731 (65311, 74383)       | 867.4 (811.8, 921.2)    |
| <b>Samoa</b>                          | 980 (924, 1043)            | 774 (730.9, 822.1)      | 1556 (1454, 1668)          | 899.8 (840.5, 964.6)    |
| <b>Solomon Islands</b>                | 1831 (1727, 1950)          | 750.9 (709.4, 795.2)    | 4721 (4425, 5044)          | 877 (823.1, 935.5)      |
| <b>Tonga</b>                          | 634 (599, 673)             | 837.9 (790.9, 887.3)    | 920 (861, 985)             | 982.5 (919.8, 1052.1)   |
| <b>Vanuatu</b>                        | 1094 (1027, 1170)          | 954.6 (893.7, 1019.1)   | 2423 (2252, 2601)          | 995.3 (924.6, 1068)     |
| <b>North Africa and Middle East</b>   | 4231679 (3998952, 4475038) | 1593.4 (1505.7, 1679.7) | 9347394 (8772972, 9935923) | 1634.8 (1535.9, 1736.9) |
| <b>Afghanistan</b>                    | 137510 (129007, 146562)    | 1682.3 (1577.6, 1790.8) | 444613 (414843, 477026)    | 1912.2 (1783.3, 2036.2) |
| <b>Algeria</b>                        | 277264 (259896, 295078)    | 1434 (1349.2, 1519.4)   | 647675 (606059, 693729)    | 1608.2 (1505.3, 1721)   |
| <b>Bahrain</b>                        | 6801 (6392, 7244)          | 1569.8 (1476.5, 1664.6) | 27213 (25383, 29129)       | 1599.1 (1493.6, 1707.6) |
| <b>Egypt</b>                          | 1267454 (1192747, 1345291) | 2921.5 (2747.6, 3098.6) | 2071082 (1932283, 2210508) | 2406.9 (2247.3, 2572.7) |

|                                    |                            |                         |                              |                         |
|------------------------------------|----------------------------|-------------------------|------------------------------|-------------------------|
| <b>Iran</b>                        | 517372 (485255, 551568)    | 1139·6 (1074·3, 1206·2) | 1153426 (1082550, 1229211)   | 1346·4 (1264·7, 1433)   |
| <b>Iraq</b>                        | 173263 (162371, 184411)    | 1331·7 (1255·7, 1408·9) | 487621 (455350, 519333)      | 1318·7 (1237·1, 1401·4) |
| <b>Jordan</b>                      | 44969 (42254, 47934)       | 1629·5 (1536·2, 1724·7) | 181207 (169865, 193412)      | 1903·1 (1784·2, 2030·8) |
| <b>Kuwait</b>                      | 17483 (16445, 18554)       | 1120·5 (1056·9, 1186·8) | 63934 (60050, 68318)         | 1379·4 (1298·7, 1472·1) |
| <b>Lebanon</b>                     | 46934 (44168, 49862)       | 1434·2 (1351·4, 1517·6) | 132682 (123826, 142009)      | 1687·8 (1577·5, 1802·5) |
| <b>Libya</b>                       | 46363 (43643, 49407)       | 1477·5 (1395·7, 1569·8) | 117319 (109621, 125488)      | 1720·9 (1610·7, 1836·9) |
| <b>Morocco</b>                     | 297545 (280397, 317433)    | 1438·7 (1352·6, 1529·1) | 589525 (551154, 629243)      | 1633·3 (1528·4, 1743·7) |
| <b>Palestine</b>                   | 20258 (18885, 21581)       | 1405·2 (1319·6, 1489·3) | 63891 (59496, 68264)         | 1591·7 (1487·4, 1693·6) |
| <b>Oman</b>                        | 22396 (20954, 23931)       | 1497·7 (1406·2, 1589·6) | 73119 (68014, 78297)         | 1627·7 (1521·3, 1730·9) |
| <b>Qatar</b>                       | 6552 (6147, 7004)          | 1617·3 (1526·1, 1714·9) | 50021 (46657, 53896)         | 1686·1 (1583·6, 1798·2) |
| <b>Saudi Arabia</b>                | 195432 (182849, 207664)    | 1631·3 (1530·8, 1732·6) | 620553 (578117, 663755)      | 1770·3 (1653·6, 1892·5) |
| <b>Sudan</b>                       | 254608 (239206, 271604)    | 1703·1 (1600·9, 1809·2) | 577751 (539624, 619167)      | 1854·6 (1727·8, 1980·3) |
| <b>Syria</b>                       | 131035 (122672, 139440)    | 1414·7 (1331·2, 1493·7) | 273306 (255943, 291219)      | 1626 (1524·1, 1731·3)   |
| <b>Tunisia</b>                     | 97224 (91350, 103538)      | 1379·6 (1299·4, 1466·9) | 201323 (188110, 215321)      | 1613·3 (1508·3, 1726·5) |
| <b>Turkey</b>                      | 495209 (464617, 527161)    | 1002 (941·9, 1064·3)    | 950431 (891961, 1012312)     | 1087·3 (1021, 1156·9)   |
| <b>United Arab Emirates</b>        | 24808 (23140, 26626)       | 1499·8 (1405, 1597·3)   | 209468 (193797, 226352)      | 1720·5 (1601·1, 1843·9) |
| <b>Yemen</b>                       | 148470 (139254, 158369)    | 1602·1 (1506·3, 1699·9) | 402504 (376129, 431062)      | 1724·4 (1611·7, 1838·7) |
| <b>South Asia</b>                  | 5061248 (4776766, 5369182) | 534·9 (505·6, 566·3)    | 10174230 (9504231, 10854055) | 588·3 (549·3, 627·9)    |
| <b>Bangladesh</b>                  | 581031 (550632, 616862)    | 677·8 (642·6, 717·3)    | 894821 (838444, 956287)      | 586·4 (549·5, 626·1)    |
| <b>Bhutan</b>                      | 3041 (2869, 3234)          | 702 (660·4, 744·6)      | 5901 (5469, 6353)            | 629·3 (584·7, 675·5)    |
| <b>India</b>                       | 3834111 (3611599, 4068470) | 504·6 (476·1, 534·5)    | 7920418 (7396535, 8456054)   | 581·3 (542·6, 620·3)    |
| <b>Nepal</b>                       | 89651 (84194, 95290)       | 578·7 (544·1, 615·4)    | 154550 (140947, 166531)      | 561·6 (512, 605)        |
| <b>Pakistan</b>                    | 553414 (521673, 588368)    | 660·3 (621·8, 702·1)    | 1198541 (1117231, 1283184)   | 645·7 (603·1, 689·9)    |
| <b>Southern sub-Saharan Africa</b> | 545717 (516449, 577644)    | 1301·2 (1231, 1375·6)   | 747141 (697989, 796627)      | 1029·0 (963, 1096·8)    |
| <b>Botswana</b>                    | 10204 (9573, 10887)        | 1071·9 (1007·1, 1143·7) | 23029 (21501, 24637)         | 1092·2 (1020·9, 1166·9) |

|                                   |                            |                         |                            |                         |
|-----------------------------------|----------------------------|-------------------------|----------------------------|-------------------------|
| <b>eSwatini</b>                   | 6877 (6466, 7326)          | 1261·3 (1187·2, 1341·1) | 10867 (10146, 11670)       | 1180·4 (1104·7, 1262·5) |
| <b>Lesotho</b>                    | 16204 (15129, 17301)       | 1160·5 (1085·6, 1235·6) | 19651 (18269, 21150)       | 1146·9 (1066·7, 1232·7) |
| <b>Namibia</b>                    | 9230 (8625, 9856)          | 866·7 (812·1, 921·4)    | 20834 (19463, 22356)       | 1033 (967·1, 1105·4)    |
| <b>South Africa</b>               | 397305 (375457, 420674)    | 1290·1 (1220·9, 1365·4) | 516301 (483219, 549392)    | 956·4 (895·2, 1017·8)   |
| <b>Zimbabwe</b>                   | 105897 (99761, 112471)     | 1486·4 (1400·9, 1574·8) | 156459 (145848, 168349)    | 1341·4 (1247·7, 1436·1) |
| <b>Western sub-Saharan Africa</b> | 2714638 (2561626, 2876475) | 1950·4 (1839·1, 2064·5) | 5970623 (5568528, 6378365) | 1883·5 (1756·6, 2010·9) |
| <b>Benin</b>                      | 64112 (60213, 68112)       | 1959·7 (1838, 2077·2)   | 156580 (146708, 167677)    | 1872 (1753, 2001)       |
| <b>Burkina Faso</b>               | 149718 (141698, 158505)    | 2242·5 (2113·6, 2368·1) | 333715 (309882, 359877)    | 2191·5 (2036·9, 2353·5) |
| <b>Cameroon</b>                   | 141340 (133259, 149696)    | 1929·1 (1819·2, 2038·6) | 375973 (350779, 402859)    | 1827·9 (1699·5, 1953·6) |
| <b>Cape Verde</b>                 | 3937 (3729, 4163)          | 1520 (1441·7, 1605)     | 8606 (8115, 9181)          | 1653 (1557·3, 1758·2)   |
| <b>Chad</b>                       | 84899 (79583, 90110)       | 2019·9 (1891·2, 2141·6) | 200360 (187712, 214631)    | 2007·7 (1880·6, 2146·4) |
| <b>Côte d'Ivoire</b>              | 157835 (148553, 167549)    | 1862·4 (1752·1, 1974·8) | 358886 (335900, 383360)    | 1844 (1728·3, 1965·3)   |
| <b>The Gambia</b>                 | 12456 (11693, 13243)       | 1844·9 (1734·7, 1955·8) | 30326 (28336, 32460)       | 1917 (1797·3, 2041)     |
| <b>Ghana</b>                      | 189862 (179549, 200913)    | 1741·7 (1646, 1842·5)   | 435721 (404390, 467226)    | 1751·2 (1626·9, 1878·2) |
| <b>Guinea</b>                     | 89803 (84402, 95445)       | 1955·4 (1837·3, 2077·4) | 165748 (154401, 177483)    | 1931·9 (1804, 2066·1)   |
| <b>Guinea-Bissau</b>              | 14536 (13710, 15418)       | 2088 (1967·5, 2214)     | 26545 (24844, 28406)       | 1948·2 (1820·4, 2083·2) |
| <b>Liberia</b>                    | 32461 (30562, 34358)       | 2165·5 (2036·1, 2294)   | 75349 (70514, 80582)       | 2064·3 (1929·3, 2205·1) |
| <b>Mali</b>                       | 144672 (136049, 154169)    | 2304·3 (2165·9, 2449·2) | 317793 (295478, 341736)    | 2268·6 (2115·9, 2428·5) |
| <b>Mauritania</b>                 | 26080 (24570, 27685)       | 1733·6 (1635·4, 1838·3) | 51300 (47852, 54868)       | 1712·9 (1598·8, 1829·4) |
| <b>Niger</b>                      | 113383 (106240, 120401)    | 2086·9 (1957·8, 2218·7) | 315839 (292648, 340054)    | 2286·8 (2126, 2454·9)   |
| <b>Nigeria</b>                    | 1276277 (1199500, 1356523) | 1912 (1796·5, 2033·5)   | 2669443 (2487962, 2859043) | 1798·3 (1674·8, 1925·7) |
| <b>São Tomé and Príncipe</b>      | 2252 (2129, 2388)          | 2605·8 (2463·2, 2761·2) | 3927 (3671, 4204)          | 2399·4 (2244·9, 2565)   |
| <b>Senegal</b>                    | 90850 (85351, 96643)       | 1708·3 (1606·6, 1816·1) | 209927 (195487, 225198)    | 1869·3 (1743·1, 1998·9) |
| <b>Sierra Leone</b>               | 71332 (66987, 75739)       | 2518·1 (2364·4, 2665·8) | 122532 (114382, 131471)    | 2073·3 (1933·1, 2222·8) |
| <b>Togo</b>                       | 48757 (45749, 51783)       | 1976·1 (1863·5, 2092·7) | 111994 (104233, 120136)    | 1864·1 (1740·3, 1998·1) |



|                                   |                            |                         |                            |                         |
|-----------------------------------|----------------------------|-------------------------|----------------------------|-------------------------|
| <b>Eastern sub-Saharan Africa</b> | 2368680 (2227599, 2511003) | 1834.2 (1724.7, 1946.7) | 5175192 (4837925, 5532017) | 1836.2 (1717.9, 1958.3) |
| <b>Burundi</b>                    | 75875 (71166, 81012)       | 2021.8 (1897.8, 2151.1) | 146762 (136402, 157814)    | 1888.4 (1755.8, 2029.3) |
| <b>Comoros</b>                    | 5137 (4805, 5495)          | 1587.6 (1483.9, 1696.2) | 11103 (10355, 11931)       | 1776.6 (1658.1, 1906.7) |
| <b>Djibouti</b>                   | 5309 (4990, 5660)          | 1554.7 (1463.3, 1650.1) | 17243 (16065, 18466)       | 1742.2 (1630.1, 1859.9) |
| <b>Eritrea</b>                    | 34911 (32655, 37154)       | 1805.5 (1691.6, 1921.8) | 84023 (78556, 90146)       | 1882.5 (1759.2, 2013.4) |
| <b>Ethiopia</b>                   | 630751 (592049, 670143)    | 1816.7 (1704.5, 1925.1) | 1298745 (1215056, 1387272) | 1780 (1667.7, 1898.6)   |
| <b>Kenya</b>                      | 300800 (282519, 320339)    | 2063.1 (1937.5, 2192.7) | 706807 (660084, 756716)    | 1918.8 (1792.1, 2049)   |
| <b>Madagascar</b>                 | 144286 (135699, 153548)    | 1721.2 (1621.2, 1827.3) | 334865 (312460, 357951)    | 1740.5 (1630.8, 1860.3) |
| <b>Malawi</b>                     | 135590 (127263, 144116)    | 2043.8 (1916.5, 2170.9) | 249305 (231517, 268025)    | 2020.4 (1875.1, 2172)   |
| <b>Mozambique</b>                 | 164885 (155611, 175460)    | 1589.6 (1500.9, 1689.4) | 387728 (360379, 416171)    | 1872.6 (1743.8, 2011.2) |
| <b>Rwanda</b>                     | 116259 (109311, 123225)    | 2383.3 (2236.1, 2528.6) | 190541 (177459, 204168)    | 1987.7 (1852, 2130.2)   |
| <b>Somalia</b>                    | 83961 (78392, 89553)       | 1649.8 (1545, 1758.3)   | 219985 (204951, 235444)    | 1857.5 (1730.4, 1986.6) |
| <b>South Sudan</b>                | 72579 (67993, 77740)       | 1760.7 (1649.1, 1878.3) | 133524 (124482, 143209)    | 1905.1 (1777.9, 2040)   |
| <b>Tanzania</b>                   | 295141 (277798, 313009)    | 1674 (1575.4, 1776.2)   | 691455 (644772, 741931)    | 1755.2 (1634.7, 1882.3) |
| <b>Uganda</b>                     | 196684 (184611, 208996)    | 1759.2 (1649, 1874.3)   | 471299 (438456, 505293)    | 1830.2 (1702.6, 1959.9) |
| <b>Zambia</b>                     | 105308 (98678, 112013)     | 2057 (1928.8, 2184.4)   | 228559 (213756, 244369)    | 1857.1 (1742.9, 1986.7) |
| <b>Central sub-Saharan Africa</b> | 657416 (617987, 699806)    | 1683.1 (1583, 1786.7)   | 1610123 (1501437, 1720285) | 1765.8 (1649.4, 1885.5) |
| <b>Angola</b>                     | 130648 (122096, 139227)    | 1788 (1675.9, 1904.5)   | 356773 (332755, 381498)    | 1777.2 (1659.5, 1902)   |
| <b>Central African Republic</b>   | 30919 (28950, 32928)       | 1543.7 (1446.8, 1644)   | 61752 (57472, 66429)       | 1654.5 (1537.6, 1778.7) |
| <b>Congo</b>                      | 27297 (25598, 29056)       | 1580.5 (1483.5, 1681.7) | 66405 (61740, 71209)       | 1574.2 (1460.6, 1685.7) |
| <b>DR Congo</b>                   | 451089 (424791, 480559)    | 1672.4 (1572, 1779.3)   | 1086844 (1011625, 1163884) | 1791 (1671.8, 1917.9)   |
| <b>Equatorial Guinea</b>          | 4656 (4354, 4960)          | 1525.9 (1429.3, 1627.2) | 15088 (14071, 16166)       | 1579.8 (1473.6, 1691.8) |
| <b>Gabon</b>                      | 12807 (12040, 13592)       | 1722.5 (1616.9, 1828.9) | 23262 (21686, 24907)       | 1555.7 (1454, 1665.3)   |

**Appendix Table 7: Proportion of causes for deaths due to cirrhosis in 2017 in both sexes**

|                                  | Hepatitis B | Hepatitis C | Alcohol | NASH | Other causes |
|----------------------------------|-------------|-------------|---------|------|--------------|
| <b>Global</b>                    | 29.0        | 25.9        | 25.1    | 8.9  | 11.1         |
| <b>High-income North America</b> | 5.7         | 34.7        | 28.2    | 10.7 | 20.6         |
| <b>Canada</b>                    | 6           | 31          | 31.8    | 9.4  | 21.9         |
| <b>Greenland</b>                 | 6.1         | 34.4        | 32.3    | 9.7  | 17.6         |
| <b>USA</b>                       | 5.7         | 35.0        | 27.9    | 10.8 | 20.6         |
| <b>Australasia</b>               | 16.7        | 36.2        | 28.2    | 11.7 | 7.1          |
| <b>Australia</b>                 | 16.6        | 36.3        | 28.4    | 11.7 | 7.1          |
| <b>New Zealand</b>               | 17.3        | 35.7        | 27.2    | 12.2 | 7.5          |
| <b>High-income Asia Pacific</b>  | 21.2        | 41.3        | 22.1    | 4.7  | 10.6         |
| <b>Brunei</b>                    | 33.8        | 23.7        | 25.6    | 5.2  | 11.7         |
| <b>Japan</b>                     | 15.9        | 53.8        | 15.2    | 4.6  | 10.6         |
| <b>Singapore</b>                 | 54.2        | 9.7         | 16.6    | 2.7  | 16.8         |
| <b>South Korea</b>               | 34.7        | 8.8         | 40.9    | 5.2  | 10.4         |
| <b>Western Europe</b>            | 8.1         | 21.4        | 41.7    | 9.5  | 19.3         |
| <b>Andorra</b>                   | 7.9         | 18.7        | 45.7    | 9.2  | 18.5         |
| <b>Austria</b>                   | 7.1         | 17.8        | 47.2    | 9.2  | 18.7         |
| <b>Belgium</b>                   | 9.6         | 14.6        | 53.5    | 7.5  | 14.8         |
| <b>Cyprus</b>                    | 8.2         | 18.1        | 42.4    | 9.9  | 21.4         |
| <b>Denmark</b>                   | 8.4         | 17.2        | 47.3    | 9.2  | 17.9         |
| <b>Finland</b>                   | 8.9         | 18.4        | 45.1    | 10.9 | 16.7         |
| <b>France</b>                    | 7.9         | 17.5        | 45.9    | 8.9  | 19.7         |
| <b>Germany</b>                   | 7.4         | 17.2        | 45.5    | 10.1 | 19.9         |
| <b>Greece</b>                    | 10.1        | 16.7        | 41.5    | 10.1 | 21.7         |
| <b>Iceland</b>                   | 7.5         | 7.6         | 39.7    | 17.1 | 28.1         |
| <b>Ireland</b>                   | 8.7         | 17.8        | 44.1    | 10.4 | 19           |
| <b>Israel</b>                    | 8.7         | 19.8        | 32.9    | 11.8 | 26.8         |
| <b>Italy</b>                     | 10.8        | 48.5        | 18.6    | 6    | 16.1         |
| <b>Luxembourg</b>                | 7.3         | 17.2        | 46.6    | 9.8  | 19           |
| <b>Malta</b>                     | 8.2         | 18.2        | 40.9    | 12.1 | 20.6         |
| <b>Netherlands</b>               | 8.4         | 17.1        | 40      | 10.6 | 23.9         |
| <b>Norway</b>                    | 8.7         | 17.8        | 42.2    | 9.8  | 21.6         |
| <b>Portugal</b>                  | 8           | 18.4        | 43.9    | 10.3 | 19.4         |

|                               |      |      |      |      |      |
|-------------------------------|------|------|------|------|------|
| <b>Spain</b>                  | 7.6  | 19.7 | 52.2 | 11.6 | 8.9  |
| <b>Sweden</b>                 | 8.7  | 16.3 | 42   | 11   | 22.1 |
| <b>Switzerland</b>            | 8.8  | 17.7 | 43.2 | 9.1  | 21.2 |
| <b>United Kingdom</b>         | 6.2  | 8.7  | 44.3 | 10.8 | 30   |
| <b>Southern Latin America</b> | 12.9 | 29.4 | 34.6 | 9.3  | 13.8 |
| <b>Argentina</b>              | 12.8 | 28.9 | 35.6 | 8.8  | 14   |
| <b>Chile</b>                  | 12.9 | 29.9 | 33.7 | 10.1 | 13.4 |
| <b>Uruguay</b>                | 13.4 | 30.4 | 29.6 | 10.2 | 16.4 |
| <b>Eastern Europe</b>         | 18.2 | 24.4 | 37.3 | 11   | 9    |
| <b>Belarus</b>                | 16.7 | 23.2 | 40.5 | 10.7 | 8.8  |
| <b>Estonia</b>                | 16.2 | 22.3 | 43.2 | 10.3 | 8    |
| <b>Latvia</b>                 | 16.8 | 23.3 | 40.1 | 11   | 8.7  |
| <b>Lithuania</b>              | 16.8 | 23.1 | 41.7 | 10.5 | 7.9  |
| <b>Moldova</b>                | 17.9 | 24.9 | 35.5 | 11.8 | 10   |
| <b>Russia</b>                 | 18.1 | 24.7 | 36.7 | 11.2 | 9.4  |
| <b>Ukraine</b>                | 18.7 | 24   | 38.5 | 10.6 | 8.2  |
| <b>Central Europe</b>         | 22.3 | 20.4 | 44   | 7.2  | 6    |
| <b>Albania</b>                | 25.2 | 22.4 | 36.6 | 7.2  | 8.6  |
| <b>Bosnia and Herzegovina</b> | 25.6 | 23   | 36.2 | 8.1  | 7.1  |
| <b>Bulgaria</b>               | 22.9 | 20.6 | 43.8 | 6.9  | 5.8  |
| <b>Croatia</b>                | 23.2 | 20.3 | 43   | 7.2  | 6.3  |
| <b>Czech Republic</b>         | 21.2 | 19.9 | 46   | 6.9  | 5.9  |
| <b>Hungary</b>                | 24.5 | 19.4 | 43.5 | 7.2  | 5.3  |
| <b>Montenegro</b>             | 24.1 | 21.8 | 40.9 | 7.3  | 5.9  |
| <b>North Macedonia</b>        | 25   | 22.4 | 37.7 | 8.3  | 6.6  |
| <b>Poland</b>                 | 21.7 | 20.4 | 45.1 | 7.1  | 5.7  |
| <b>Romania</b>                | 21.7 | 20.4 | 44   | 7.3  | 6.5  |
| <b>Serbia</b>                 | 23.1 | 21.6 | 41.5 | 7.5  | 6.3  |
| <b>Slovakia</b>               | 21.7 | 20.3 | 45.3 | 7.1  | 5.5  |
| <b>Slovenia</b>               | 22.6 | 20.8 | 42.7 | 7.8  | 6.1  |
| <b>Central Asia</b>           | 21.9 | 24   | 36.6 | 8.1  | 9.4  |
| <b>Armenia</b>                | 21.3 | 25   | 34.9 | 8.3  | 10.5 |
| <b>Azerbaijan</b>             | 22.3 | 24.2 | 35.5 | 8.8  | 9.2  |
| <b>Georgia</b>                | 21.9 | 24.2 | 38.5 | 8.2  | 7.3  |
| <b>Kazakhstan</b>             | 20.6 | 23.8 | 39.5 | 8    | 8    |

|                                         |      |      |      |      |      |
|-----------------------------------------|------|------|------|------|------|
| <b>Kyrgyzstan</b>                       | 22.9 | 25.1 | 36   | 7.7  | 8.4  |
| <b>Mongolia</b>                         | 21.9 | 24.8 | 36.6 | 7.7  | 9    |
| <b>Tajikistan</b>                       | 21.7 | 23.4 | 33.7 | 7    | 14.2 |
| <b>Turkmenistan</b>                     | 22.5 | 24.2 | 35.8 | 8.1  | 9.4  |
| <b>Uzbekistan</b>                       | 22.3 | 23.8 | 35.6 | 8.2  | 10.1 |
| <b>Central Latin America</b>            | 6.3  | 31.1 | 36.6 | 16.1 | 9.9  |
| <b>Colombia</b>                         | 6.9  | 27.8 | 40.1 | 14.6 | 10.6 |
| <b>Costa Rica</b>                       | 6.2  | 28.3 | 40.9 | 16.2 | 8.4  |
| <b>El Salvador</b>                      | 6.7  | 30.2 | 36.8 | 16.9 | 9.5  |
| <b>Guatemala</b>                        | 7.6  | 33.2 | 33.3 | 15.3 | 10.5 |
| <b>Honduras</b>                         | 7    | 32.2 | 32.8 | 16.5 | 11.4 |
| <b>Mexico</b>                           | 6    | 31.4 | 36.6 | 16.2 | 9.9  |
| <b>Nicaragua</b>                        | 6.6  | 30.9 | 35.7 | 18.1 | 8.8  |
| <b>Panama</b>                           | 6.9  | 30.3 | 37.9 | 14   | 10.9 |
| <b>Venezuela</b>                        | 6.8  | 29.6 | 38.6 | 17.3 | 7.8  |
| <b>Andean Latin America</b>             | 11.7 | 13.7 | 38.1 | 22.2 | 14.3 |
| <b>Bolivia</b>                          | 11.6 | 14.1 | 37   | 22.4 | 14.9 |
| <b>Ecuador</b>                          | 11.9 | 14.4 | 33   | 25.2 | 15.5 |
| <b>Peru</b>                             | 11.5 | 13.1 | 41.8 | 20.2 | 13.4 |
| <b>Caribbean</b>                        | 11   | 22.7 | 34.8 | 19.1 | 12.4 |
| <b>Antigua and Barbuda</b>              | 10.1 | 22.1 | 33.2 | 22.3 | 12.3 |
| <b>The Bahamas</b>                      | 10.3 | 22.6 | 36.5 | 19.4 | 11.1 |
| <b>Barbados</b>                         | 10.4 | 22.1 | 34.3 | 21.8 | 11.5 |
| <b>Belize</b>                           | 10.6 | 22.4 | 34.6 | 20.7 | 11.8 |
| <b>Bermuda</b>                          | 11   | 20   | 36.1 | 22   | 10.9 |
| <b>Cuba</b>                             | 10.4 | 23   | 34.8 | 20.7 | 11.1 |
| <b>Dominica</b>                         | 10.4 | 21.8 | 34.6 | 20   | 13.2 |
| <b>Dominican Republic</b>               | 10.8 | 22.1 | 35.4 | 18   | 13.7 |
| <b>Grenada</b>                          | 10.3 | 22.3 | 35.3 | 19.7 | 12.4 |
| <b>Guyana</b>                           | 10.8 | 23.3 | 35.9 | 19.5 | 10.5 |
| <b>Haiti</b>                            | 12.5 | 23.7 | 35.1 | 15.9 | 12.8 |
| <b>Jamaica</b>                          | 10.7 | 22.7 | 32.1 | 20.4 | 14.1 |
| <b>Puerto Rico</b>                      | 10.1 | 21.7 | 34.1 | 21.9 | 12.3 |
| <b>Saint Lucia</b>                      | 10   | 21.9 | 34.7 | 21.7 | 11.7 |
| <b>Saint Vincent and the Grenadines</b> | 10.2 | 21.4 | 34.2 | 24.5 | 9.7  |

|                                       |      |      |      |      |      |
|---------------------------------------|------|------|------|------|------|
| <b>Suriname</b>                       | 11·1 | 22·3 | 35·1 | 19·7 | 11·8 |
| <b>Trinidad and Tobago</b>            | 11   | 22·5 | 33·1 | 22·3 | 11   |
| <b>Virgin Islands</b>                 | 10   | 21·3 | 36·6 | 21·4 | 10·7 |
| <b>Tropical Latin America</b>         | 15·9 | 26·2 | 22·1 | 22·6 | 13·2 |
| <b>Brazil</b>                         | 15·9 | 26·2 | 22   | 22·6 | 13·2 |
| <b>Paraguay</b>                       | 16·1 | 23·3 | 26·8 | 20·5 | 13·3 |
| <b>East Asia</b>                      | 48·8 | 22·4 | 18·1 | 6·9  | 3·8  |
| <b>China</b>                          | 48·9 | 22·2 | 18·1 | 7    | 3·8  |
| <b>North Korea</b>                    | 50   | 23·6 | 16·8 | 5·2  | 4·4  |
| <b>Taiwan (province of China)</b>     | 45   | 25·6 | 18·3 | 7·2  | 4    |
| <b>Southeast Asia</b>                 | 33   | 34·8 | 14·9 | 9·9  | 7·3  |
| <b>Cambodia</b>                       | 34·9 | 29·6 | 16·6 | 10·4 | 8·5  |
| <b>Indonesia</b>                      | 28·6 | 41·9 | 11·9 | 10·1 | 7·5  |
| <b>Laos</b>                           | 37·7 | 27·7 | 18   | 8·8  | 7·8  |
| <b>Malaysia</b>                       | 43·7 | 19·3 | 18   | 12·8 | 6·3  |
| <b>Maldives</b>                       | 34·9 | 28·7 | 16·6 | 12·4 | 7·4  |
| <b>Mauritius</b>                      | 34·5 | 29·1 | 19   | 11·4 | 6    |
| <b>Myanmar</b>                        | 38·1 | 30·4 | 16   | 8·4  | 7·2  |
| <b>Philippines</b>                    | 36·2 | 28·8 | 18·7 | 9·1  | 7·1  |
| <b>Sri Lanka</b>                      | 36   | 30·4 | 17·7 | 9·1  | 6·7  |
| <b>Seychelles</b>                     | 34·2 | 29   | 17·5 | 13·4 | 5·9  |
| <b>Thailand</b>                       | 34·2 | 27·3 | 17·6 | 13·8 | 7·1  |
| <b>East Timor</b>                     | 37·8 | 29·1 | 15·5 | 9    | 8·7  |
| <b>Vietnam</b>                        | 38   | 28·3 | 18·7 | 8    | 6·9  |
| <b>Oceania</b>                        | 43·9 | 24   | 16·1 | 7·5  | 8·6  |
| <b>American Samoa</b>                 | 40·9 | 21·5 | 14·5 | 16·5 | 6·6  |
| <b>Federated States of Micronesia</b> | 41·3 | 23·9 | 15·4 | 11·3 | 8·1  |
| <b>Fiji</b>                           | 40·3 | 24·6 | 15·8 | 10·9 | 8·5  |
| <b>Guam</b>                           | 42·7 | 22·5 | 17   | 11·7 | 6    |
| <b>Kiribati</b>                       | 42·8 | 22·9 | 14·2 | 11·1 | 9    |
| <b>Marshall Islands</b>               | 42·7 | 23·1 | 15·5 | 11·2 | 7·6  |
| <b>Northern Mariana Islands</b>       | 43·2 | 23·2 | 16·4 | 11·5 | 5·8  |
| <b>Papua New Guinea</b>               | 44·2 | 24·1 | 16·2 | 6·7  | 8·8  |
| <b>Samoa</b>                          | 41·6 | 22·5 | 15·2 | 12·8 | 7·9  |
| <b>Solomon Islands</b>                | 43·3 | 24·1 | 15·7 | 9    | 7·8  |

|                                     |      |      |      |      |      |
|-------------------------------------|------|------|------|------|------|
| <b>Tonga</b>                        | 39.9 | 22.7 | 14.9 | 14   | 8.6  |
| <b>Vanuatu</b>                      | 45   | 23.8 | 14.9 | 8.3  | 8    |
| <b>North Africa and Middle East</b> | 38.1 | 35.4 | 5.3  | 12.9 | 8.2  |
| <b>Afghanistan</b>                  | 32.5 | 35.2 | 5.3  | 8.9  | 18   |
| <b>Algeria</b>                      | 31.8 | 39.3 | 6.2  | 12.8 | 9.9  |
| <b>Bahrain</b>                      | 31   | 40.4 | 7.3  | 15.3 | 6.1  |
| <b>Egypt</b>                        | 41.5 | 34.4 | 4.8  | 12.8 | 6.5  |
| <b>Iran</b>                         | 28.7 | 43.3 | 5.4  | 13.8 | 8.7  |
| <b>Iraq</b>                         | 31   | 36.4 | 5.8  | 12   | 14.7 |
| <b>Jordan</b>                       | 30.2 | 38.1 | 6.1  | 15.4 | 10.1 |
| <b>Kuwait</b>                       | 30.3 | 39.5 | 6.7  | 17.8 | 5.9  |
| <b>Lebanon</b>                      | 34.4 | 36.5 | 5.9  | 13.4 | 9.7  |
| <b>Libya</b>                        | 30   | 37.7 | 6    | 16.5 | 9.9  |
| <b>Morocco</b>                      | 31.7 | 39.4 | 6    | 13   | 10   |
| <b>Palestine</b>                    | 31.2 | 38.2 | 5.9  | 13   | 11.6 |
| <b>Oman</b>                         | 30.7 | 39.5 | 6.6  | 15.2 | 7.9  |
| <b>Qatar</b>                        | 30.7 | 39.3 | 7.1  | 16.8 | 6.1  |
| <b>Saudi Arabia</b>                 | 22.3 | 48.6 | 6.4  | 16.3 | 6.4  |
| <b>Sudan</b>                        | 33   | 36   | 6.3  | 10.6 | 14.1 |
| <b>Syria</b>                        | 31.7 | 38.6 | 6.1  | 13.4 | 10.3 |
| <b>Tunisia</b>                      | 12   | 55.7 | 7.2  | 14.9 | 10.1 |
| <b>Turkey</b>                       | 54.7 | 16.2 | 6.7  | 14.1 | 8.4  |
| <b>United Arab Emirates</b>         | 31.7 | 41.7 | 7.9  | 14.9 | 3.8  |
| <b>Yemen</b>                        | 31.3 | 38.7 | 6.1  | 9.4  | 14.5 |
| <b>South Asia</b>                   | 32.6 | 20.8 | 29.4 | 5.4  | 11.8 |
| <b>Bangladesh</b>                   | 28.2 | 24.5 | 27.7 | 5.6  | 14   |
| <b>Bhutan</b>                       | 29   | 23.2 | 30.1 | 5.9  | 11.9 |
| <b>India</b>                        | 34.7 | 16.7 | 33.1 | 5.2  | 10.4 |
| <b>Nepal</b>                        | 22.6 | 15   | 46.7 | 5    | 10.7 |
| <b>Pakistan</b>                     | 26.4 | 39.5 | 10.4 | 6.3  | 17.4 |
| <b>Southern sub-Saharan Africa</b>  | 21.9 | 33.9 | 19.7 | 9.5  | 15   |
| <b>Botswana</b>                     | 21.8 | 35.6 | 19.3 | 8.5  | 14.8 |
| <b>eSwatini</b>                     | 22.9 | 36.1 | 18.2 | 8.6  | 14.1 |
| <b>Lesotho</b>                      | 22.8 | 35.7 | 19.4 | 7.9  | 14.2 |
| <b>Namibia</b>                      | 23.9 | 34.7 | 21   | 6.6  | 13.9 |

|                                   |      |      |      |      |      |
|-----------------------------------|------|------|------|------|------|
| <b>South Africa</b>               | 21.1 | 33.4 | 20.5 | 10.6 | 14.5 |
| <b>Zimbabwe</b>                   | 24.1 | 34.7 | 17.2 | 6.8  | 17.1 |
| <b>Western sub-Saharan Africa</b> | 48.9 | 7.8  | 19.9 | 6.2  | 17.1 |
| <b>Benin</b>                      | 49.9 | 7.8  | 16.9 | 7    | 18.4 |
| <b>Burkina Faso</b>               | 49.5 | 7.6  | 17.5 | 6    | 19.4 |
| <b>Cameroon</b>                   | 49.3 | 8.2  | 18.6 | 7.9  | 16   |
| <b>Cape Verde</b>                 | 49.6 | 8.8  | 19.3 | 7.6  | 14.7 |
| <b>Chad</b>                       | 54.8 | 7.4  | 16   | 5    | 16.8 |
| <b>Côte d'Ivoire</b>              | 51.6 | 8.1  | 18.5 | 6.2  | 15.6 |
| <b>The Gambia</b>                 | 51.5 | 8    | 17.2 | 6.6  | 16.7 |
| <b>Ghana</b>                      | 48.4 | 8.7  | 18.3 | 7.5  | 17.1 |
| <b>Guinea</b>                     | 54   | 7.7  | 15.6 | 5.7  | 17   |
| <b>Guinea-Bissau</b>              | 53.9 | 7.5  | 16.1 | 6.6  | 15.9 |
| <b>Liberia</b>                    | 53.1 | 7.3  | 16.1 | 6.7  | 16.8 |
| <b>Mali</b>                       | 51.7 | 7.4  | 13.1 | 5.7  | 22   |
| <b>Mauritania</b>                 | 52   | 8.3  | 14.6 | 8.2  | 16.9 |
| <b>Niger</b>                      | 53.8 | 7.1  | 13.8 | 5.1  | 20.3 |
| <b>Nigeria</b>                    | 47.5 | 7.8  | 21.8 | 6    | 17   |
| <b>São Tomé and Príncipe</b>      | 50.4 | 8.2  | 18.6 | 6.9  | 15.9 |
| <b>Senegal</b>                    | 54.6 | 7.9  | 14.2 | 6.4  | 16.8 |
| <b>Sierra Leone</b>               | 51.2 | 7.8  | 18.2 | 6.2  | 16.7 |
| <b>Togo</b>                       | 54.7 | 7.9  | 15.7 | 6.2  | 15.4 |
| <b>Eastern sub-Saharan Africa</b> | 25.9 | 28.9 | 20.3 | 7    | 17.9 |
| <b>Burundi</b>                    | 23   | 30.8 | 23.2 | 6.4  | 16.5 |
| <b>Comoros</b>                    | 24.6 | 32.2 | 17.3 | 7.6  | 18.3 |
| <b>Djibouti</b>                   | 25.7 | 30.5 | 20   | 8.3  | 15.5 |
| <b>Eritrea</b>                    | 24.9 | 31.7 | 19.7 | 6.3  | 17.5 |
| <b>Ethiopia</b>                   | 29.3 | 33.9 | 16.2 | 5.6  | 15   |
| <b>Kenya</b>                      | 27.7 | 13.5 | 27.5 | 10   | 21.2 |
| <b>Madagascar</b>                 | 24.9 | 31.6 | 19.4 | 6.5  | 17.6 |
| <b>Malawi</b>                     | 25.4 | 30.5 | 18.2 | 6.9  | 19   |
| <b>Mozambique</b>                 | 25.8 | 27.4 | 18.4 | 6.6  | 21.7 |
| <b>Rwanda</b>                     | 14.1 | 47.1 | 18.9 | 5.5  | 14.4 |
| <b>Somalia</b>                    | 26.2 | 30.7 | 19   | 6.8  | 17.3 |
| <b>South Sudan</b>                | 27.3 | 29.3 | 19.5 | 7.3  | 16.6 |

|                                   |      |      |      |     |      |
|-----------------------------------|------|------|------|-----|------|
| <b>Tanzania</b>                   | 22.9 | 29.6 | 20.1 | 7.3 | 20.2 |
| <b>Uganda</b>                     | 22.9 | 29.5 | 23   | 6.6 | 18.1 |
| <b>Zambia</b>                     | 25   | 30.7 | 19.5 | 6.9 | 17.9 |
| <b>Central sub-Saharan Africa</b> | 31.2 | 32.4 | 16.8 | 5.7 | 14   |
| <b>Angola</b>                     | 29.9 | 32.1 | 17.3 | 6.7 | 14.1 |
| <b>Central African Republic</b>   | 32.4 | 32.4 | 16.6 | 5.3 | 13.4 |
| <b>Congo</b>                      | 30.3 | 33   | 17.3 | 6.4 | 13.1 |
| <b>DR Congo</b>                   | 31.8 | 32.4 | 16.5 | 5.1 | 14.2 |
| <b>Equatorial Guinea</b>          | 29.2 | 30.8 | 17.4 | 8.9 | 13.7 |
| <b>Gabon</b>                      | 28.1 | 33.7 | 18.4 | 7.4 | 12.4 |

NASH=non-alcoholic steatohepatitis.



**Appendix Table 8: Proportion of causes for prevalent cases of decompensated cirrhosis in 2017 in both sexes**

|                                  | Hepatitis B | Hepatitis C | Alcohol | NASH | Other causes |
|----------------------------------|-------------|-------------|---------|------|--------------|
| <b>Global</b>                    | 27.9        | 24.8        | 23.1    | 8.6  | 15.5         |
| <b>High-income North America</b> | 5.1         | 33          | 26.9    | 10.2 | 24.8         |
| <b>Canada</b>                    | 5.4         | 30.5        | 30.9    | 9.3  | 23.9         |
| <b>Greenland</b>                 | 5.7         | 32.3        | 30.5    | 8.4  | 23           |
| <b>USA</b>                       | 5.1         | 33.2        | 26.5    | 10.3 | 24.9         |
| <b>Australasia</b>               | 23          | 28.3        | 24.9    | 12.9 | 10.8         |
| <b>Australia</b>                 | 23          | 28.5        | 25      | 12.8 | 10.7         |
| <b>New Zealand</b>               | 23.1        | 27.6        | 24.1    | 13.3 | 11.8         |
| <b>High-income Asia Pacific</b>  | 20          | 43.6        | 19.7    | 4.3  | 12.4         |
| <b>Brunei</b>                    | 32.2        | 21.8        | 22.7    | 4.2  | 19.1         |
| <b>Japan</b>                     | 14.9        | 55.6        | 14      | 3.8  | 11.8         |
| <b>Singapore</b>                 | 50          | 13          | 16.4    | 2.2  | 18.4         |
| <b>South Korea</b>               | 33.6        | 9.4         | 37.2    | 6.2  | 13.6         |
| <b>Western Europe</b>            | 8.1         | 23.6        | 43.1    | 8.8  | 16.3         |
| <b>Andorra</b>                   | 8           | 18.6        | 49.3    | 9.1  | 15.1         |
| <b>Austria</b>                   | 7           | 17.6        | 50.5    | 8.9  | 16.1         |
| <b>Belgium</b>                   | 8.3         | 22.4        | 49.4    | 5.6  | 14.4         |
| <b>Cyprus</b>                    | 8.2         | 18.9        | 46      | 10.2 | 16.7         |
| <b>Denmark</b>                   | 8.2         | 16.6        | 50      | 8.6  | 16.6         |
| <b>Finland</b>                   | 8.9         | 18          | 45.2    | 10.7 | 17.2         |
| <b>France</b>                    | 7.7         | 17.1        | 49.3    | 8.6  | 17.2         |
| <b>Germany</b>                   | 7.3         | 17          | 49.8    | 9.7  | 16.1         |
| <b>Greece</b>                    | 10.2        | 17          | 45.8    | 10.3 | 16.6         |
| <b>Iceland</b>                   | 7.3         | 8.8         | 37.4    | 22.3 | 24.2         |
| <b>Ireland</b>                   | 8.7         | 17.4        | 47      | 9.7  | 17.2         |
| <b>Israel</b>                    | 9           | 20.7        | 36.5    | 11.6 | 22.2         |
| <b>Italy</b>                     | 10.6        | 50.3        | 19.8    | 6.2  | 13.2         |
| <b>Luxembourg</b>                | 7.2         | 16.8        | 51.2    | 9.1  | 15.7         |
| <b>Malta</b>                     | 8.3         | 18.7        | 45.2    | 11.8 | 16           |
| <b>Netherlands</b>               | 8.7         | 17.5        | 46.3    | 10.2 | 17.3         |
| <b>Norway</b>                    | 8.7         | 17.8        | 44.6    | 9.7  | 19.1         |
| <b>Portugal</b>                  | 8           | 18.5        | 47.4    | 10.2 | 15.9         |

|                               |      |      |      |      |      |
|-------------------------------|------|------|------|------|------|
| <b>Spain</b>                  | 7.1  | 25.7 | 50.8 | 8.9  | 7.4  |
| <b>Sweden</b>                 | 8.3  | 15.7 | 45.1 | 10.4 | 20.6 |
| <b>Switzerland</b>            | 8.9  | 17.9 | 48.1 | 8.9  | 16.2 |
| <b>UK</b>                     | 6.3  | 8.7  | 46.7 | 10.4 | 27.9 |
| <b>Southern Latin America</b> | 12   | 26.6 | 33.4 | 9.1  | 18.8 |
| <b>Argentina</b>              | 11.9 | 26.2 | 34   | 8.6  | 19.4 |
| <b>Chile</b>                  | 12.1 | 27.3 | 33.1 | 9.9  | 17.6 |
| <b>Uruguay</b>                | 12.6 | 28   | 29.4 | 10.3 | 19.7 |
| <b>Eastern Europe</b>         | 16.6 | 30.1 | 33   | 9.4  | 10.9 |
| <b>Belarus</b>                | 15.7 | 28.9 | 35.8 | 8.9  | 10.6 |
| <b>Estonia</b>                | 15.2 | 27.9 | 37.6 | 8.9  | 10.4 |
| <b>Latvia</b>                 | 15.8 | 29   | 35.3 | 9.4  | 10.5 |
| <b>Lithuania</b>              | 15.6 | 28.8 | 36.3 | 8.9  | 10.3 |
| <b>Moldova</b>                | 17.2 | 30.9 | 32.4 | 9.4  | 10.1 |
| <b>Russia</b>                 | 16.5 | 30.3 | 32.4 | 9.5  | 11.2 |
| <b>Ukraine</b>                | 17.2 | 30   | 33.6 | 9.2  | 10   |
| <b>Central Europe</b>         | 20.8 | 15.8 | 46   | 8.1  | 9.2  |
| <b>Albania</b>                | 23.4 | 18   | 39   | 8.5  | 11   |
| <b>Bosnia and Herzegovina</b> | 24   | 18.2 | 38.5 | 9.3  | 10   |
| <b>Bulgaria</b>               | 21   | 15.9 | 46.4 | 7.9  | 8.7  |
| <b>Croatia</b>                | 21.3 | 15.8 | 45.5 | 8.4  | 8.9  |
| <b>Czech Republic</b>         | 19.8 | 15.4 | 48   | 7.7  | 9    |
| <b>Hungary</b>                | 23   | 15   | 45.4 | 8    | 8.6  |
| <b>Montenegro</b>             | 22   | 16.6 | 42.7 | 8.2  | 10.5 |
| <b>North Macedonia</b>        | 23.2 | 17.5 | 39.7 | 9.6  | 10   |
| <b>Poland</b>                 | 20   | 15.5 | 47   | 7.9  | 9.6  |
| <b>Romania</b>                | 20.6 | 16   | 46.4 | 8.3  | 8.8  |
| <b>Serbia</b>                 | 21.5 | 16.8 | 43.6 | 8.6  | 9.6  |
| <b>Slovakia</b>               | 20.2 | 15.6 | 47.1 | 7.8  | 9.3  |
| <b>Slovenia</b>               | 20.9 | 16.2 | 45.3 | 9    | 8.6  |
| <b>Central Asia</b>           | 19.3 | 22.3 | 33.6 | 7.9  | 16.9 |
| <b>Armenia</b>                | 19.8 | 24   | 34.5 | 8.8  | 12.9 |
| <b>Azerbaijan</b>             | 20.4 | 22.9 | 33.5 | 8.7  | 14.4 |
| <b>Georgia</b>                | 19.6 | 23   | 36.6 | 8.8  | 12   |
| <b>Kazakhstan</b>             | 18.1 | 22   | 36.5 | 7.9  | 15.5 |

|                                         |      |      |      |      |      |
|-----------------------------------------|------|------|------|------|------|
| <b>Kyrgyzstan</b>                       | 19.7 | 22.6 | 31.3 | 7.3  | 19.2 |
| <b>Mongolia</b>                         | 19.7 | 22.8 | 33   | 7.1  | 17.4 |
| <b>Tajikistan</b>                       | 18.9 | 21.3 | 30.3 | 6.6  | 23   |
| <b>Turkmenistan</b>                     | 19.4 | 22.6 | 32.9 | 8.1  | 17   |
| <b>Uzbekistan</b>                       | 19.5 | 22   | 32.6 | 7.9  | 18   |
| <b>Central Latin America</b>            | 5.3  | 30.4 | 38.1 | 14.4 | 11.8 |
| <b>Colombia</b>                         | 5.6  | 28.3 | 42   | 13   | 11.1 |
| <b>Costa Rica</b>                       | 5.1  | 28.5 | 42.1 | 14.3 | 10   |
| <b>El Salvador</b>                      | 5.3  | 29.8 | 37.7 | 15.4 | 11.8 |
| <b>Guatemala</b>                        | 5.9  | 32.4 | 33.5 | 14.2 | 14   |
| <b>Honduras</b>                         | 5.8  | 31.9 | 33.8 | 14.4 | 14.1 |
| <b>Mexico</b>                           | 5    | 31.2 | 37.1 | 14.6 | 12.1 |
| <b>Nicaragua</b>                        | 5.3  | 30.4 | 35.7 | 16.3 | 12.2 |
| <b>Panama</b>                           | 5.7  | 30.7 | 39.7 | 12.5 | 11.4 |
| <b>Venezuela</b>                        | 5.6  | 29.5 | 38.6 | 15.6 | 10.7 |
| <b>Andean Latin America</b>             | 15.1 | 16.7 | 29.8 | 18.1 | 20.3 |
| <b>Bolivia</b>                          | 14.9 | 17   | 27.6 | 17.7 | 22.7 |
| <b>Ecuador</b>                          | 15.3 | 17.6 | 25.4 | 20.8 | 20.8 |
| <b>Peru</b>                             | 15   | 16.1 | 32.6 | 17   | 19.3 |
| <b>Caribbean</b>                        | 10.5 | 24.8 | 29.8 | 18.1 | 16.7 |
| <b>Antigua and Barbuda</b>              | 10   | 24.6 | 29.3 | 20.4 | 15.7 |
| <b>The Bahamas</b>                      | 10   | 24.6 | 31.3 | 17.6 | 16.5 |
| <b>Barbados</b>                         | 10   | 24.4 | 29.6 | 21.1 | 14.9 |
| <b>Belize</b>                           | 10   | 23.8 | 28.6 | 17.9 | 19.8 |
| <b>Bermuda</b>                          | 10.6 | 22.4 | 31.8 | 22   | 13.3 |
| <b>Cuba</b>                             | 10.3 | 25.4 | 30.2 | 19.7 | 14.4 |
| <b>Dominica</b>                         | 10.4 | 24.2 | 30.9 | 18.5 | 16   |
| <b>Dominican Republic</b>               | 10.5 | 24.4 | 31.1 | 16.2 | 17.8 |
| <b>Grenada</b>                          | 10.2 | 24.3 | 30.4 | 18.2 | 16.8 |
| <b>Guyana</b>                           | 10.1 | 24.7 | 29.2 | 17.4 | 18.6 |
| <b>Haiti</b>                            | 12   | 24.6 | 27.6 | 13   | 22.8 |
| <b>Jamaica</b>                          | 10.4 | 25.3 | 28.1 | 18.8 | 17.4 |
| <b>Puerto Rico</b>                      | 9.9  | 24   | 29.8 | 21.3 | 15.1 |
| <b>Saint Lucia</b>                      | 10   | 24.1 | 30.5 | 19.8 | 15.5 |
| <b>Saint Vincent and the Grenadines</b> | 9.6  | 23   | 28.3 | 23.6 | 15.5 |

|                                       |      |      |      |      |      |
|---------------------------------------|------|------|------|------|------|
| <b>Suriname</b>                       | 10·7 | 24·4 | 30·1 | 18   | 16·8 |
| <b>Trinidad and Tobago</b>            | 10·7 | 24·7 | 28·4 | 20·9 | 15·3 |
| <b>Virgin Islands</b>                 | 9·7  | 23·5 | 31·6 | 20·6 | 14·6 |
| <b>Tropical Latin America</b>         | 15   | 28·4 | 19·6 | 20·3 | 16·8 |
| <b>Brazil</b>                         | 15   | 28·5 | 19·5 | 20·3 | 16·7 |
| <b>Paraguay</b>                       | 14·9 | 25·8 | 22·8 | 17·8 | 18·5 |
| <b>East Asia</b>                      | 51·6 | 18·3 | 16·5 | 7·2  | 6·4  |
| <b>China</b>                          | 51·7 | 18·1 | 16·5 | 7·3  | 6·4  |
| <b>North Korea</b>                    | 52·1 | 20·7 | 14·5 | 5·3  | 7·4  |
| <b>Taiwan (province of China)</b>     | 45·1 | 26·8 | 15·6 | 7·3  | 5·2  |
| <b>Southeast Asia</b>                 | 31·9 | 31·8 | 13·7 | 11·4 | 11·1 |
| <b>Cambodia</b>                       | 32·8 | 29   | 14·3 | 9·9  | 14   |
| <b>Indonesia</b>                      | 27   | 41·5 | 10·2 | 10·2 | 11   |
| <b>Laos</b>                           | 34·6 | 26·5 | 14·8 | 9    | 15   |
| <b>Malaysia</b>                       | 43·2 | 20·1 | 14   | 12   | 10·6 |
| <b>Maldives</b>                       | 34·4 | 29·3 | 14·1 | 12·1 | 10·2 |
| <b>Mauritius</b>                      | 31·8 | 28·5 | 16·4 | 14·8 | 8·6  |
| <b>Myanmar</b>                        | 34   | 29·5 | 13·2 | 11·2 | 12   |
| <b>Philippines</b>                    | 33·1 | 27·6 | 15·3 | 10·2 | 13·9 |
| <b>Sri Lanka</b>                      | 32·8 | 29·8 | 15·1 | 12·2 | 10   |
| <b>Seychelles</b>                     | 31·5 | 28·2 | 14·9 | 16·3 | 9·1  |
| <b>Thailand</b>                       | 31·5 | 26·6 | 16·4 | 16·9 | 8·6  |
| <b>East Timor</b>                     | 34·2 | 27·4 | 12·3 | 8·9  | 17·1 |
| <b>Vietnam</b>                        | 35   | 28   | 15·9 | 9·9  | 11·2 |
| <b>Oceania</b>                        | 39·2 | 20·9 | 11·8 | 8    | 20·2 |
| <b>American Samoa</b>                 | 38·5 | 19·2 | 11·4 | 16·9 | 14   |
| <b>Federated States of Micronesia</b> | 38·9 | 21·4 | 12·1 | 11·1 | 16·5 |
| <b>Fiji</b>                           | 39·1 | 22·8 | 13   | 10·9 | 14·2 |
| <b>Guam</b>                           | 41·5 | 21·1 | 14·3 | 12·5 | 10·5 |
| <b>Kiribati</b>                       | 38·9 | 19·7 | 10·6 | 10·3 | 20·4 |
| <b>Marshall Islands</b>               | 39·3 | 20·5 | 11·8 | 11·1 | 17·4 |
| <b>Northern Mariana Islands</b>       | 42·8 | 22·3 | 14·6 | 12·4 | 8    |
| <b>Papua New Guinea</b>               | 39·2 | 20·7 | 11·6 | 6·9  | 21·7 |
| <b>Samoa</b>                          | 38·6 | 20   | 11·7 | 12·3 | 17·4 |
| <b>Solomon Islands</b>                | 38·4 | 20·2 | 11·1 | 8·5  | 21·7 |

|                                     |      |      |      |      |      |
|-------------------------------------|------|------|------|------|------|
| <b>Tonga</b>                        | 37.3 | 20.9 | 11.8 | 14.1 | 15.9 |
| <b>Vanuatu</b>                      | 40.2 | 20.3 | 10.5 | 8    | 21   |
| <b>North Africa and Middle East</b> | 27.3 | 36.5 | 3.8  | 13.7 | 18.7 |
| <b>Afghanistan</b>                  | 23.4 | 29.0 | 2.9  | 7.8  | 37   |
| <b>Algeria</b>                      | 25.9 | 38.7 | 4.4  | 14.4 | 16.6 |
| <b>Bahrain</b>                      | 26.6 | 39.8 | 5.1  | 16.7 | 11.8 |
| <b>Egypt</b>                        | 23   | 42.1 | 3    | 13.1 | 18.8 |
| <b>Iran</b>                         | 27.9 | 42.5 | 2.9  | 12.1 | 14.6 |
| <b>Iraq</b>                         | 24.3 | 33.2 | 3.5  | 12.3 | 26.6 |
| <b>Jordan</b>                       | 23.1 | 34.7 | 3.7  | 15.4 | 23   |
| <b>Kuwait</b>                       | 25.2 | 37.9 | 4.3  | 19.5 | 13.1 |
| <b>Lebanon</b>                      | 27.5 | 35.5 | 4.1  | 14.8 | 18.1 |
| <b>Libya</b>                        | 24.1 | 36.6 | 4.1  | 18   | 17.2 |
| <b>Morocco</b>                      | 25.6 | 38.7 | 4.3  | 14.6 | 16.8 |
| <b>Palestine</b>                    | 23.8 | 34.3 | 3.6  | 12.5 | 25.8 |
| <b>Oman</b>                         | 26.9 | 38.2 | 4.3  | 15.4 | 15.1 |
| <b>Qatar</b>                        | 28.1 | 39.2 | 4.8  | 17.5 | 10.5 |
| <b>Saudi Arabia</b>                 | 15.3 | 52.3 | 3.8  | 15   | 13.5 |
| <b>Sudan</b>                        | 24.2 | 32.7 | 3.8  | 10.8 | 28.6 |
| <b>Syria</b>                        | 24.4 | 36.4 | 4    | 14.7 | 20.5 |
| <b>Tunisia</b>                      | 20.8 | 31.4 | 7.1  | 23   | 17.7 |
| <b>Turkey</b>                       | 46.7 | 19.7 | 4.5  | 15.8 | 13.3 |
| <b>United Arab Emirates</b>         | 29.5 | 40.9 | 5.4  | 15.5 | 8.7  |
| <b>Yemen</b>                        | 23.3 | 33.9 | 3.5  | 8.9  | 30.4 |
| <b>South Asia</b>                   | 28   | 17.9 | 23.8 | 5.2  | 25.1 |
| <b>Bangladesh</b>                   | 26   | 21.2 | 21.4 | 5.9  | 25.6 |
| <b>Bhutan</b>                       | 26.1 | 20.4 | 22.5 | 6.3  | 24.6 |
| <b>India</b>                        | 29.2 | 15.2 | 26.3 | 5.1  | 24.3 |
| <b>Nepal</b>                        | 18.8 | 10.2 | 38.1 | 5.1  | 27.8 |
| <b>Pakistan</b>                     | 22   | 36.9 | 5.9  | 5.3  | 29.9 |
| <b>Southern sub-Saharan Africa</b>  | 17.3 | 20   | 15.3 | 9.7  | 37.7 |
| <b>Botswana</b>                     | 17.8 | 21.6 | 15.6 | 8.8  | 36.3 |
| <b>eSwatini</b>                     | 16.5 | 19.4 | 12.3 | 8.2  | 43.6 |
| <b>Lesotho</b>                      | 17.3 | 20.1 | 14.1 | 7.7  | 40.7 |
| <b>Namibia</b>                      | 18.6 | 20   | 15.6 | 6.6  | 39.1 |

|                                   |      |      |      |      |      |
|-----------------------------------|------|------|------|------|------|
| <b>South Africa</b>               | 17.3 | 20.5 | 16.2 | 10.9 | 35.2 |
| <b>Zimbabwe</b>                   | 17   | 18   | 12   | 5.9  | 47.1 |
| <b>Western sub-Saharan Africa</b> | 34.5 | 9.9  | 12.2 | 5.4  | 38   |
| <b>Benin</b>                      | 34.1 | 9.6  | 10.8 | 5.8  | 39.7 |
| <b>Burkina Faso</b>               | 33.8 | 9.4  | 11.5 | 4.9  | 40.4 |
| <b>Cameroon</b>                   | 33.3 | 9.9  | 11.7 | 6.4  | 38.6 |
| <b>Cape Verde</b>                 | 38.3 | 12.2 | 14.1 | 7.8  | 27.5 |
| <b>Chad</b>                       | 35.1 | 8.5  | 9.1  | 3.9  | 43.4 |
| <b>Côte d'Ivoire</b>              | 35.4 | 10.2 | 11.5 | 5.4  | 37.5 |
| <b>The Gambia</b>                 | 35.2 | 9.8  | 10.9 | 5.5  | 38.7 |
| <b>Ghana</b>                      | 34.9 | 11.4 | 13   | 6.5  | 34   |
| <b>Guinea</b>                     | 37.2 | 9.6  | 9.9  | 4.9  | 38.4 |
| <b>Guinea-Bissau</b>              | 35.8 | 8.8  | 9.7  | 5.3  | 40.4 |
| <b>Liberia</b>                    | 38   | 9.4  | 10.9 | 5.8  | 35.9 |
| <b>Mali</b>                       | 36.6 | 9.4  | 8.5  | 4.8  | 40.7 |
| <b>Mauritania</b>                 | 36.7 | 10.7 | 9.7  | 7.3  | 35.7 |
| <b>Niger</b>                      | 35.8 | 8.3  | 8.3  | 4    | 43.6 |
| <b>Nigeria</b>                    | 33.1 | 10   | 14.2 | 5.4  | 37.2 |
| <b>São Tomé and Príncipe</b>      | 36.8 | 10.9 | 12.9 | 6.3  | 33.1 |
| <b>Senegal</b>                    | 38.8 | 10.1 | 9.2  | 5.6  | 36.2 |
| <b>Sierra Leone</b>               | 35.9 | 9.8  | 12.1 | 5.1  | 37.1 |
| <b>Togo</b>                       | 38.9 | 10.1 | 10.2 | 5.3  | 35.6 |
| <b>Eastern sub-Saharan Africa</b> | 18.3 | 25.7 | 12.2 | 5.4  | 38.5 |
| <b>Burundi</b>                    | 15.3 | 26.3 | 14.6 | 4.9  | 38.9 |
| <b>Comoros</b>                    | 18.7 | 31.3 | 12.7 | 6.7  | 30.5 |
| <b>Djibouti</b>                   | 19.5 | 29.8 | 14.4 | 7.4  | 28.9 |
| <b>Eritrea</b>                    | 16.3 | 27.9 | 12.1 | 5.2  | 38.6 |
| <b>Ethiopia</b>                   | 20.5 | 27.5 | 9.6  | 4.3  | 38.1 |
| <b>Kenya</b>                      | 24.8 | 17.2 | 14   | 6.7  | 37.2 |
| <b>Madagascar</b>                 | 17   | 28   | 12.5 | 5.2  | 37.3 |
| <b>Malawi</b>                     | 16.7 | 26.6 | 11.3 | 5.8  | 39.6 |
| <b>Mozambique</b>                 | 17.1 | 24.2 | 12.2 | 5.3  | 41.2 |
| <b>Rwanda</b>                     | 8.7  | 36.7 | 14.7 | 5.2  | 34.7 |
| <b>Somalia</b>                    | 17.5 | 26.3 | 11.6 | 5.3  | 39.4 |
| <b>South Sudan</b>                | 18.1 | 25.4 | 11.9 | 5.9  | 38.7 |

|                                   |      |      |      |     |      |
|-----------------------------------|------|------|------|-----|------|
| <b>Tanzania</b>                   | 16.1 | 26.9 | 13.6 | 6.1 | 37.3 |
| <b>Uganda</b>                     | 14.6 | 24.2 | 13.7 | 5   | 42.5 |
| <b>Zambia</b>                     | 16.2 | 26.4 | 11.9 | 5.6 | 40   |
| <b>Central sub-Saharan Africa</b> | 26.8 | 22.2 | 10.6 | 4.7 | 35.8 |
| <b>Angola</b>                     | 24.8 | 21.5 | 10.7 | 5.5 | 37.5 |
| <b>Central African Republic</b>   | 28.1 | 22.1 | 10.5 | 4.3 | 34.9 |
| <b>Congo</b>                      | 27.7 | 24.2 | 12.1 | 5.6 | 30.5 |
| <b>DR Congo</b>                   | 27.3 | 22.2 | 10.4 | 4.3 | 35.7 |
| <b>Equatorial Guinea</b>          | 24.4 | 20.5 | 10.9 | 7.4 | 36.9 |
| <b>Gabon</b>                      | 26.1 | 25.4 | 13   | 7   | 28.4 |

NASH=non-alcoholic steatohepatitis.

**Appendix Table 9: Proportion of causes for prevalent cases of compensated cirrhosis in 2017 in both sexes**

|                                  | Hepatitis B | Hepatitis C | Alcohol | NASH | Other causes |
|----------------------------------|-------------|-------------|---------|------|--------------|
| <b>Global</b>                    | 32.6        | 24.7        | 21      | 8.4  | 13.3         |
| <b>High-income North America</b> | 5.1         | 33.7        | 27.1    | 10.5 | 23.6         |
| <b>Canada</b>                    | 5.3         | 31.1        | 30.7    | 9.6  | 23.2         |
| <b>Greenland</b>                 | 5.7         | 32.9        | 30      | 8.9  | 22.5         |
| <b>USA</b>                       | 5.1         | 33.9        | 26.7    | 10.6 | 23.7         |
| <b>Australasia</b>               | 22.8        | 28.8        | 24.1    | 12.6 | 11.7         |
| <b>Australia</b>                 | 22.9        | 29          | 24.3    | 12.5 | 11.2         |
| <b>New Zealand</b>               | 22.5        | 27.6        | 23.2    | 12.8 | 13.8         |
| <b>High-income Asia Pacific</b>  | 21.1        | 40.5        | 19.5    | 4.3  | 14.5         |
| <b>Brunei</b>                    | 31.4        | 20.9        | 18.9    | 4    | 24.7         |
| <b>Japan</b>                     | 14.7        | 54.9        | 13.3    | 3.6  | 13.4         |
| <b>Singapore</b>                 | 47.8        | 12.3        | 14      | 2.1  | 23.9         |
| <b>South Korea</b>               | 33.9        | 9.5         | 34.2    | 6    | 16.3         |
| <b>Western Europe</b>            | 8.5         | 24.1        | 42.1    | 8.7  | 16.5         |
| <b>Andorra</b>                   | 8.4         | 19.1        | 48.4    | 8.9  | 15.1         |
| <b>Austria</b>                   | 7.5         | 18.2        | 49.9    | 8.8  | 15.7         |
| <b>Belgium</b>                   | 8.7         | 23.2        | 48.2    | 5.5  | 14.3         |
| <b>Cyprus</b>                    | 8.8         | 19.5        | 45.2    | 9.8  | 16.7         |
| <b>Denmark</b>                   | 8.7         | 17.1        | 49      | 8.4  | 16.7         |
| <b>Finland</b>                   | 9.5         | 18.5        | 44.4    | 10.3 | 17.2         |
| <b>France</b>                    | 8.2         | 17.7        | 48.6    | 8.4  | 17.1         |
| <b>Germany</b>                   | 7.8         | 17.6        | 49.1    | 9.7  | 15.8         |
| <b>Greece</b>                    | 10.7        | 17.5        | 45.1    | 10.1 | 16.6         |
| <b>Iceland</b>                   | 8           | 8.8         | 36.5    | 21.4 | 25.4         |
| <b>Ireland</b>                   | 9.2         | 17.9        | 45.6    | 9.5  | 17.7         |
| <b>Israel</b>                    | 9.5         | 21.3        | 35.3    | 11.4 | 22.5         |
| <b>Italy</b>                     | 10.9        | 51.1        | 19.3    | 6.1  | 12.6         |
| <b>Luxembourg</b>                | 7.8         | 17.5        | 50.4    | 9.1  | 15.2         |
| <b>Malta</b>                     | 8.8         | 19.2        | 43.9    | 11.5 | 16.6         |
| <b>Netherlands</b>               | 9.1         | 17.9        | 44.9    | 10.1 | 18           |
| <b>Norway</b>                    | 9.1         | 17.9        | 42.6    | 9.3  | 21.1         |
| <b>Portugal</b>                  | 8.5         | 19.1        | 47.2    | 9.9  | 15.2         |
| <b>Spain</b>                     | 7.5         | 26.5        | 50      | 8.8  | 7.2          |



|                               |      |      |      |      |      |
|-------------------------------|------|------|------|------|------|
| Sweden                        | 8.8  | 15.6 | 42.1 | 10.3 | 23.2 |
| Switzerland                   | 9.4  | 18.4 | 46.7 | 8.8  | 16.6 |
| UK                            | 6.6  | 8.5  | 45.5 | 10.2 | 29.2 |
| <b>Southern Latin America</b> | 12.6 | 27.9 | 33.9 | 9.3  | 16.2 |
| Argentina                     | 12.6 | 27.5 | 34.5 | 8.7  | 16.7 |
| Chile                         | 12.7 | 28.6 | 33.4 | 10.2 | 15.2 |
| Uruguay                       | 13.1 | 29.2 | 29.6 | 10.4 | 17.6 |
| <b>Eastern Europe</b>         | 17.2 | 30   | 31.4 | 9.1  | 12.2 |
| Belarus                       | 16.3 | 28.8 | 34.3 | 8.6  | 12   |
| Estonia                       | 15.7 | 27.7 | 35.9 | 8.5  | 12.1 |
| Latvia                        | 16.3 | 28.8 | 33.7 | 9    | 12.1 |
| Lithuania                     | 16.2 | 28.6 | 34.7 | 8.6  | 11.9 |
| Moldova                       | 17.8 | 31.3 | 30.5 | 9.3  | 11   |
| Russia                        | 17.1 | 30.2 | 31   | 9.2  | 12.5 |
| Ukraine                       | 17.8 | 29.8 | 31.8 | 8.9  | 11.7 |
| <b>Central Europe</b>         | 21.5 | 15.9 | 43.6 | 7.8  | 11.2 |
| Albania                       | 23.6 | 17.6 | 36   | 8.1  | 14.7 |
| Bosnia and Herzegovina        | 24.3 | 18   | 36.2 | 9    | 12.6 |
| Bulgaria                      | 21.8 | 16   | 44.1 | 7.7  | 10.4 |
| Croatia                       | 22.2 | 15.9 | 43.2 | 8.1  | 10.6 |
| Czech Republic                | 20.3 | 15.5 | 45.6 | 7.6  | 11.1 |
| Hungary                       | 23.9 | 15.1 | 42.9 | 7.8  | 10.3 |
| Montenegro                    | 22.1 | 16.2 | 39.6 | 7.9  | 14.1 |
| North Macedonia               | 23.7 | 17.2 | 37   | 9.1  | 12.9 |
| Poland                        | 20.7 | 15.5 | 44.4 | 7.6  | 11.7 |
| Romania                       | 21.4 | 16.3 | 44.2 | 8    | 10   |
| Serbia                        | 21.9 | 16.7 | 40.9 | 8.3  | 12.3 |
| Slovakia                      | 21   | 15.6 | 44.6 | 7.6  | 11.2 |
| Slovenia                      | 21.6 | 16.3 | 43   | 8.7  | 10.3 |
| <b>Central Asia</b>           | 20.1 | 22.6 | 32.2 | 7.8  | 17.3 |
| Armenia                       | 20.3 | 24   | 32.6 | 8.4  | 14.7 |
| Azerbaijan                    | 21   | 23.1 | 31.9 | 8.5  | 15.5 |
| Georgia                       | 20.4 | 23.2 | 34.8 | 8.4  | 13.3 |
| Kazakhstan                    | 18.9 | 22.4 | 35.3 | 7.7  | 15.6 |
| Kyrgyzstan                    | 20.7 | 23.1 | 30.3 | 7.2  | 18.7 |

|                                         |      |      |      |      |      |
|-----------------------------------------|------|------|------|------|------|
| <b>Mongolia</b>                         | 20·6 | 23·6 | 32·7 | 7·2  | 15·8 |
| <b>Tajikistan</b>                       | 19·6 | 21·5 | 28·8 | 6·5  | 23·6 |
| <b>Turkmenistan</b>                     | 20·5 | 23   | 31·8 | 7·9  | 16·8 |
| <b>Uzbekistan</b>                       | 20·3 | 22·4 | 31·5 | 7·8  | 18   |
| <b>Central Latin America</b>            | 5·5  | 32·2 | 38·1 | 14·2 | 10   |
| <b>Colombia</b>                         | 5·8  | 29·5 | 41·5 | 12·7 | 10·5 |
| <b>Costa Rica</b>                       | 5·4  | 29·9 | 42   | 13·9 | 8·9  |
| <b>El Salvador</b>                      | 5·6  | 31·6 | 38·1 | 15   | 9·8  |
| <b>Guatemala</b>                        | 6·3  | 34·7 | 34   | 13·9 | 11   |
| <b>Honduras</b>                         | 6·1  | 34·1 | 34·3 | 14·4 | 11·1 |
| <b>Mexico</b>                           | 5·2  | 32·8 | 37·8 | 14·4 | 9·9  |
| <b>Nicaragua</b>                        | 5·6  | 32·2 | 35·9 | 16   | 10·3 |
| <b>Panama</b>                           | 5·9  | 32   | 39·4 | 12·2 | 10·5 |
| <b>Venezuela</b>                        | 5·9  | 31   | 38·5 | 15·2 | 9·5  |
| <b>Andean Latin America</b>             | 15·5 | 17·6 | 29·6 | 18   | 19·3 |
| <b>Bolivia</b>                          | 15·6 | 18·1 | 27·9 | 17·8 | 20·6 |
| <b>Ecuador</b>                          | 15·8 | 18·6 | 25·5 | 20·7 | 19·5 |
| <b>Peru</b>                             | 15·4 | 16·9 | 32·3 | 16·6 | 18·8 |
| <b>Caribbean</b>                        | 11·3 | 26·3 | 30·1 | 17·2 | 15·1 |
| <b>Antigua and Barbuda</b>              | 10·5 | 25·8 | 29·3 | 20   | 14·3 |
| <b>The Bahamas</b>                      | 10·7 | 26   | 31·6 | 17·3 | 14·4 |
| <b>Barbados</b>                         | 10·4 | 25·5 | 29·7 | 20·5 | 13·9 |
| <b>Belize</b>                           | 10·9 | 25·6 | 29·2 | 17·8 | 16·6 |
| <b>Bermuda</b>                          | 11   | 23·3 | 32   | 21·3 | 12·4 |
| <b>Cuba</b>                             | 10·7 | 26·4 | 30·3 | 19·2 | 13·4 |
| <b>Dominica</b>                         | 10·9 | 25·3 | 30·8 | 18   | 15   |
| <b>Dominican Republic</b>               | 11·2 | 26   | 31·5 | 15·8 | 15·4 |
| <b>Grenada</b>                          | 10·7 | 25·7 | 30·6 | 17·7 | 15·4 |
| <b>Guyana</b>                           | 11   | 26·5 | 30·3 | 17·2 | 14·9 |
| <b>Haiti</b>                            | 13·2 | 27   | 28·8 | 13·2 | 17·8 |
| <b>Jamaica</b>                          | 10·9 | 26·4 | 27·7 | 18·2 | 16·7 |
| <b>Puerto Rico</b>                      | 10·3 | 25·2 | 30·5 | 20·6 | 13·4 |
| <b>Saint Lucia</b>                      | 10·4 | 25·4 | 30·7 | 19·5 | 14   |
| <b>Saint Vincent and the Grenadines</b> | 10·2 | 24·4 | 28·7 | 22·9 | 13·9 |
| <b>Suriname</b>                         | 11·4 | 26   | 30·9 | 17·6 | 14·1 |

|                                       |      |      |      |      |      |
|---------------------------------------|------|------|------|------|------|
| <b>Trinidad and Tobago</b>            | 11.3 | 26   | 28.5 | 20.3 | 13.9 |
| <b>Virgin Islands</b>                 | 10.1 | 24.6 | 32.3 | 20.1 | 12.9 |
| <b>Tropical Latin America</b>         | 15.7 | 30   | 20   | 20   | 14.4 |
| <b>Brazil</b>                         | 15.7 | 30   | 19.9 | 20   | 14.3 |
| <b>Paraguay</b>                       | 15.9 | 27.8 | 23   | 17.9 | 15.3 |
| <b>East Asia</b>                      | 53.1 | 18.9 | 16.2 | 7    | 4.8  |
| <b>China</b>                          | 53.3 | 18.6 | 16.3 | 7    | 4.8  |
| <b>North Korea</b>                    | 53.6 | 21.4 | 14.4 | 5.1  | 5.4  |
| <b>Taiwan (province of China)</b>     | 45.9 | 27.6 | 15.3 | 6.9  | 4.4  |
| <b>Southeast Asia</b>                 | 33.1 | 33.6 | 13.8 | 10.8 | 8.8  |
| <b>Cambodia</b>                       | 34.9 | 30.8 | 14.8 | 9.7  | 9.9  |
| <b>Indonesia</b>                      | 27.8 | 42.9 | 10.3 | 10.2 | 8.8  |
| <b>Laos</b>                           | 37   | 28.2 | 15.3 | 8.9  | 10.7 |
| <b>Malaysia</b>                       | 44.5 | 20.7 | 13.8 | 11.9 | 9.1  |
| <b>Maldives</b>                       | 35.2 | 30   | 13.6 | 12   | 9.2  |
| <b>Mauritius</b>                      | 32.8 | 29.4 | 16.5 | 13.9 | 7.5  |
| <b>Myanmar</b>                        | 36.1 | 31   | 13.7 | 10.4 | 8.8  |
| <b>Philippines</b>                    | 35.3 | 29.1 | 15.7 | 9.5  | 10.4 |
| <b>Sri Lanka</b>                      | 34   | 30.8 | 15.2 | 11.4 | 8.6  |
| <b>Seychelles</b>                     | 33   | 29.4 | 15.3 | 15.3 | 7    |
| <b>Thailand</b>                       | 32.4 | 27.6 | 16.2 | 16.1 | 7.6  |
| <b>East Timor</b>                     | 36.1 | 29.1 | 12.6 | 8.8  | 13.4 |
| <b>Vietnam</b>                        | 36.6 | 29.2 | 16.2 | 9.4  | 8.6  |
| <b>Oceania</b>                        | 43.6 | 22.9 | 12.3 | 8    | 13.2 |
| <b>American Samoa</b>                 | 40.4 | 20.1 | 11.3 | 16.8 | 11.4 |
| <b>Federated States of Micronesia</b> | 41.7 | 22.8 | 12.2 | 11.2 | 12.1 |
| <b>Fiji</b>                           | 41   | 23.8 | 12.8 | 10.8 | 11.5 |
| <b>Guam</b>                           | 43.2 | 21.8 | 14   | 12.2 | 8.8  |
| <b>Kiribati</b>                       | 43.4 | 21.8 | 11.2 | 10.7 | 12.8 |
| <b>Marshall Islands</b>               | 42.8 | 22.1 | 12.2 | 11.3 | 11.5 |
| <b>Northern Mariana Islands</b>       | 43.5 | 22.6 | 14.1 | 12.1 | 7.6  |
| <b>Papua New Guinea</b>               | 44   | 23   | 12.4 | 7.2  | 13.5 |
| <b>Samoa</b>                          | 41.4 | 21.3 | 11.9 | 12.4 | 13.1 |
| <b>Solomon Islands</b>                | 42.6 | 22.4 | 11.7 | 8.9  | 14.4 |
| <b>Tonga</b>                          | 39.7 | 22.2 | 11.9 | 14.1 | 12.1 |

|                                     |      |      |      |      |      |
|-------------------------------------|------|------|------|------|------|
| <b>Vanuatu</b>                      | 44.6 | 22.4 | 11.1 | 8.3  | 13.6 |
| <b>North Africa and Middle East</b> | 28   | 39.2 | 3.7  | 13.4 | 15.7 |
| <b>Afghanistan</b>                  | 27.8 | 34.3 | 3.2  | 8.8  | 25.9 |
| <b>Algeria</b>                      | 27.1 | 40.1 | 4.2  | 13.7 | 14.9 |
| <b>Bahrain</b>                      | 27.8 | 40.6 | 4.9  | 16.4 | 10.2 |
| <b>Egypt</b>                        | 24.9 | 44.9 | 3.1  | 13.4 | 13.7 |
| <b>Iran</b>                         | 29.1 | 43.5 | 2.8  | 12.1 | 12.5 |
| <b>Iraq</b>                         | 26.1 | 35.4 | 3.4  | 12.3 | 22.7 |
| <b>Jordan</b>                       | 24.2 | 36.4 | 3.5  | 15.5 | 20.4 |
| <b>Kuwait</b>                       | 26.4 | 39   | 4    | 18.9 | 11.7 |
| <b>Lebanon</b>                      | 29   | 36.8 | 3.9  | 14.1 | 16.3 |
| <b>Libya</b>                        | 25.5 | 38.4 | 4    | 17.7 | 14.5 |
| <b>Morocco</b>                      | 26.6 | 40   | 4    | 14.1 | 15.2 |
| <b>Palestine</b>                    | 25.5 | 36.4 | 3.5  | 12.5 | 22.2 |
| <b>Oman</b>                         | 29   | 39.9 | 4.2  | 14.9 | 12   |
| <b>Qatar</b>                        | 29.7 | 40.1 | 4.5  | 17.1 | 8.6  |
| <b>Saudi Arabia</b>                 | 16.1 | 54.1 | 3.7  | 15.1 | 11   |
| <b>Sudan</b>                        | 26.8 | 35.9 | 3.8  | 11   | 22.4 |
| <b>Syria</b>                        | 25.4 | 37.6 | 3.9  | 14.2 | 18.8 |
| <b>Tunisia</b>                      | 20.6 | 32.5 | 6.8  | 22.4 | 17.6 |
| <b>Turkey</b>                       | 48.1 | 20   | 4.4  | 14.6 | 12.9 |
| <b>United Arab Emirates</b>         | 30.8 | 41.6 | 5.2  | 15.3 | 7    |
| <b>Yemen</b>                        | 26.2 | 37.5 | 3.6  | 9.1  | 23.6 |
| <b>South Asia</b>                   | 30.4 | 19.9 | 24.8 | 5.2  | 19.7 |
| <b>Bangladesh</b>                   | 27.8 | 23   | 22.1 | 5.9  | 21.2 |
| <b>Bhutan</b>                       | 28.6 | 22.3 | 23.8 | 6.4  | 18.9 |
| <b>India</b>                        | 31.8 | 16.4 | 27.6 | 5.1  | 19.1 |
| <b>Nepal</b>                        | 21.1 | 11.3 | 41.2 | 5.3  | 21.1 |
| <b>Pakistan</b>                     | 24.5 | 41.2 | 6.4  | 5.6  | 22.4 |
| <b>Southern sub-Saharan Africa</b>  | 19.8 | 22.8 | 16.9 | 10.2 | 30.3 |
| <b>Botswana</b>                     | 20.2 | 24.6 | 17.2 | 9.5  | 28.5 |
| <b>eSwatini</b>                     | 20   | 23.4 | 14.6 | 9.4  | 32.5 |
| <b>Lesotho</b>                      | 20.6 | 23.7 | 16.3 | 8.6  | 30.8 |
| <b>Namibia</b>                      | 21.4 | 23   | 17.6 | 7.2  | 30.8 |
| <b>South Africa</b>                 | 19.2 | 22.8 | 17.5 | 11.4 | 29.1 |

|                                   |      |      |      |     |      |
|-----------------------------------|------|------|------|-----|------|
| <b>Zimbabwe</b>                   | 21.4 | 22.7 | 14.8 | 7   | 34.1 |
| <b>Western sub-Saharan Africa</b> | 39.3 | 11.2 | 13.6 | 5.9 | 30   |
| <b>Benin</b>                      | 39.2 | 11   | 12.1 | 6.5 | 31.2 |
| <b>Burkina Faso</b>               | 39.7 | 11   | 13.2 | 5.5 | 30.6 |
| <b>Cameroon</b>                   | 38.4 | 11.5 | 13.2 | 7.2 | 29.7 |
| <b>Cape Verde</b>                 | 40.2 | 12.8 | 14.5 | 7.7 | 24.7 |
| <b>Chad</b>                       | 41.7 | 10.1 | 10.6 | 4.6 | 33   |
| <b>Côte d'Ivoire</b>              | 41   | 11.8 | 13.1 | 6   | 28.2 |
| <b>The Gambia</b>                 | 40   | 11.1 | 12.1 | 6.1 | 30.8 |
| <b>Ghana</b>                      | 38.7 | 12.6 | 14   | 7   | 27.6 |
| <b>Guinea</b>                     | 42.4 | 10.9 | 11   | 5.4 | 30.4 |
| <b>Guinea-Bissau</b>              | 42.6 | 10.5 | 11.3 | 6.1 | 29.5 |
| <b>Liberia</b>                    | 43.2 | 10.7 | 12.1 | 6.4 | 27.5 |
| <b>Mali</b>                       | 42.2 | 10.8 | 9.5  | 5.4 | 32.2 |
| <b>Mauritania</b>                 | 40.3 | 11.7 | 10.3 | 7.8 | 29.8 |
| <b>Niger</b>                      | 42.6 | 9.9  | 9.6  | 4.6 | 33.3 |
| <b>Nigeria</b>                    | 37.3 | 11.3 | 15.7 | 5.9 | 29.8 |
| <b>São Tomé and Príncipe</b>      | 40.8 | 12.1 | 14   | 6.7 | 26.4 |
| <b>Senegal</b>                    | 43.2 | 11.3 | 10   | 6.1 | 29.4 |
| <b>Sierra Leone</b>               | 40.7 | 11.1 | 13.3 | 5.6 | 29.3 |
| <b>Togo</b>                       | 44   | 11.4 | 11.3 | 5.8 | 27.5 |
| <b>Eastern sub-Saharan Africa</b> | 21.2 | 29.3 | 13.7 | 5.8 | 30   |
| <b>Burundi</b>                    | 18.2 | 30.6 | 16.4 | 5.4 | 29.4 |
| <b>Comoros</b>                    | 20.5 | 33.5 | 13.2 | 6.8 | 26   |
| <b>Djibouti</b>                   | 21.5 | 32.2 | 14.8 | 7.7 | 23.8 |
| <b>Eritrea</b>                    | 19.5 | 32.2 | 13.8 | 5.6 | 29   |
| <b>Ethiopia</b>                   | 23.6 | 31.3 | 10.9 | 4.7 | 29.3 |
| <b>Kenya</b>                      | 27.7 | 19   | 15.6 | 7.2 | 30.5 |
| <b>Madagascar</b>                 | 19.4 | 31.4 | 13.5 | 5.6 | 30.2 |
| <b>Malawi</b>                     | 19.9 | 30.9 | 12.8 | 6.2 | 30.3 |
| <b>Mozambique</b>                 | 20.4 | 28.1 | 13.8 | 5.8 | 31.9 |
| <b>Rwanda</b>                     | 9.8  | 41.2 | 16.4 | 5.6 | 26.9 |
| <b>Somalia</b>                    | 20.8 | 30.6 | 13.1 | 5.8 | 29.7 |
| <b>South Sudan</b>                | 21.3 | 29.3 | 13.3 | 6.5 | 29.5 |
| <b>Tanzania</b>                   | 18.5 | 30.4 | 14.8 | 6.5 | 29.8 |

|                                   |      |      |      |     |      |
|-----------------------------------|------|------|------|-----|------|
| <b>Uganda</b>                     | 17.7 | 28.7 | 15.8 | 5.5 | 32.2 |
| <b>Zambia</b>                     | 19.5 | 30.9 | 13.6 | 6.1 | 29.9 |
| <b>Central sub-Saharan Africa</b> | 30.7 | 25.2 | 11.8 | 5.1 | 27.2 |
| <b>Angola</b>                     | 28.9 | 24.9 | 12.2 | 6.1 | 28   |
| <b>Central African Republic</b>   | 32.3 | 25.2 | 11.8 | 4.7 | 26   |
| <b>Congo</b>                      | 30.8 | 26.8 | 13.1 | 6   | 23.3 |
| <b>DR Congo</b>                   | 31.3 | 25.2 | 11.6 | 4.7 | 27.4 |
| <b>Equatorial Guinea</b>          | 28.1 | 23.4 | 12.2 | 8   | 28.2 |
| <b>Gabon</b>                      | 28.4 | 27.5 | 13.8 | 7.2 | 23   |

**Appendix Table 10: Proportion of causes for DALYs due to cirrhosis in 2017 in both sexes**  
**DALYs=disability-adjusted life years.**

|                                  | Hepatitis B | Hepatitis C | Alcohol | NASH | Other causes |
|----------------------------------|-------------|-------------|---------|------|--------------|
| <b>Global</b>                    | 29.5        | 25.1        | 24.6    | 8.3  | 12.5         |
| <b>High-income North America</b> | 5.8         | 36.1        | 29.2    | 10.8 | 18.1         |
| Canada                           | 5.9         | 32.5        | 33.6    | 9.6  | 18.5         |
| Greenland                        | 6.1         | 34.8        | 32.2    | 9.6  | 17.4         |
| USA                              | 5.7         | 36.4        | 28.9    | 10.9 | 18.1         |
| <b>Australasia</b>               | 17          | 36          | 29.1    | 11.9 | 6.1          |
| Australia                        | 16.9        | 36.1        | 29.2    | 11.8 | 6            |
| New Zealand                      | 17.6        | 35.3        | 27.9    | 12.5 | 6.7          |
| <b>High-income Asia Pacific</b>  | 22.5        | 39          | 25.1    | 4.7  | 8.7          |
| Brunei                           | 34.6        | 23.1        | 25.5    | 4.8  | 12           |
| Japan                            | 15.6        | 55.4        | 16      | 4.4  | 8.7          |
| Singapore                        | 53.5        | 10.9        | 17.3    | 2.6  | 15.6         |
| South Korea                      | 34.7        | 9.1         | 42.4    | 5.2  | 8.6          |
| <b>Western Europe</b>            | 8.2         | 21.3        | 44.9    | 9.6  | 16           |
| Andorra                          | 8.1         | 19.2        | 48.1    | 9.2  | 15.3         |
| Austria                          | 7.2         | 18.3        | 49.6    | 9.2  | 15.6         |
| Belgium                          | 9.5         | 15.8        | 55.7    | 7.4  | 11.5         |
| Cyprus                           | 8.4         | 18.7        | 44.9    | 10   | 18           |
| Denmark                          | 8.4         | 17.6        | 49.2    | 9.3  | 15.4         |
| Finland                          | 9.1         | 18.8        | 46.5    | 10.8 | 14.9         |
| France                           | 8           | 18          | 48.7    | 9    | 16.3         |
| Germany                          | 7.5         | 17.7        | 48.2    | 10.2 | 16.4         |
| Greece                           | 10.3        | 17.2        | 45      | 10.2 | 17.3         |
| Iceland                          | 7.7         | 8.3         | 41      | 18.7 | 24.3         |
| Ireland                          | 8.9         | 18.2        | 46.3    | 10.3 | 16.3         |
| Israel                           | 8.9         | 20.4        | 36      | 11.8 | 22.9         |
| Italy                            | 10.9        | 50.6        | 20.2    | 6    | 12.3         |
| Luxembourg                       | 7.5         | 17.7        | 49.2    | 9.8  | 15.8         |
| Malta                            | 8.5         | 18.8        | 43.3    | 12.1 | 17.4         |
| Netherlands                      | 8.6         | 17.7        | 44.2    | 10.7 | 18.8         |
| Norway                           | 8.9         | 18.3        | 45.2    | 9.8  | 17.9         |
| Portugal                         | 8.1         | 19          | 46.6    | 10.3 | 15.9         |

|                               |             |             |             |             |             |
|-------------------------------|-------------|-------------|-------------|-------------|-------------|
| Spain                         | 7·6         | 20·7        | 54·1        | 11·1        | 6·5         |
| Sweden                        | 8·8         | 16·9        | 44·7        | 11          | 18·6        |
| Switzerland                   | 8·9         | 18·3        | 46·4        | 9·3         | 17·2        |
| UK                            | 6·6         | 9·3         | 48·2        | 11·1        | 24·9        |
| <b>Southern Latin America</b> | <b>12·8</b> | <b>29·5</b> | <b>35·9</b> | <b>9·2</b>  | <b>12·6</b> |
| Argentina                     | 12·7        | 29          | 36·8        | 8·6         | 13          |
| Chile                         | 12·9        | 30·3        | 35·1        | 10          | 11·7        |
| Uruguay                       | 13·4        | 30·7        | 31·4        | 10·1        | 14·5        |
| <b>Eastern Europe</b>         | <b>18·7</b> | <b>24·6</b> | <b>37·3</b> | <b>10·7</b> | <b>8·7</b>  |
| Belarus                       | 17·1        | 23·4        | 40·7        | 10·3        | 8·4         |
| Estonia                       | 16·4        | 22·6        | 43·3        | 10          | 7·6         |
| Latvia                        | 17·1        | 23·6        | 40·4        | 10·8        | 8·1         |
| Lithuania                     | 17·1        | 23·3        | 42          | 10·2        | 7·4         |
| Moldova                       | 18·2        | 25          | 36·1        | 11·6        | 9·1         |
| Russia                        | 18·7        | 24·8        | 36·7        | 10·8        | 9           |
| Ukraine                       | 19·3        | 24·1        | 38·2        | 10·2        | 8·3         |
| <b>Central Europe</b>         | <b>22·6</b> | <b>20·5</b> | <b>43·9</b> | <b>7·3</b>  | <b>5·8</b>  |
| Albania                       | 25·1        | 21·8        | 36·1        | 7·3         | 9·7         |
| Bosnia and Herzegovina        | 25·7        | 22·9        | 36·3        | 8·2         | 6·9         |
| Bulgaria                      | 23·2        | 20·7        | 43·6        | 6·9         | 5·6         |
| Croatia                       | 23·3        | 20·4        | 43·1        | 7·4         | 5·7         |
| Czech Republic                | 21·4        | 19·9        | 45·9        | 7           | 5·7         |
| Hungary                       | 24·6        | 19·6        | 43·4        | 7·3         | 5·1         |
| Montenegro                    | 24          | 21·1        | 41          | 7·5         | 6·5         |
| North Macedonia               | 24·8        | 21·9        | 37·5        | 8·4         | 7·3         |
| Poland                        | 22·1        | 20·3        | 44·9        | 7·1         | 5·6         |
| Romania                       | 22          | 20·7        | 43·8        | 7·4         | 6           |
| Serbia                        | 23·3        | 21·6        | 41·5        | 7·6         | 6           |
| Slovakia                      | 21·9        | 20·2        | 45·2        | 7·1         | 5·5         |
| Slovenia                      | 22·7        | 20·9        | 42·8        | 8           | 5·6         |
| <b>Central Asia</b>           | <b>22·4</b> | <b>23·5</b> | <b>35·3</b> | <b>7·7</b>  | <b>11·2</b> |
| Armenia                       | 21·7        | 24·9        | 35·9        | 8·2         | 9·3         |
| Azerbaijan                    | 22·6        | 23·8        | 35          | 8·6         | 10          |
| Georgia                       | 22·3        | 24·2        | 39          | 8           | 6·5         |
| Kazakhstan                    | 21·1        | 23·7        | 39          | 7·7         | 8·5         |



|                                         |      |      |      |      |      |
|-----------------------------------------|------|------|------|------|------|
| <b>Kyrgyzstan</b>                       | 23.4 | 24.8 | 35.1 | 7.3  | 9.5  |
| <b>Mongolia</b>                         | 22.4 | 24.5 | 36.1 | 7.3  | 9.6  |
| <b>Tajikistan</b>                       | 21.4 | 21.8 | 30.2 | 6.2  | 20.4 |
| <b>Turkmenistan</b>                     | 23   | 23.6 | 34.3 | 7.5  | 11.5 |
| <b>Uzbekistan</b>                       | 22.8 | 23.1 | 33.8 | 7.7  | 12.5 |
| <b>Central Latin America</b>            | 6.4  | 31.9 | 36.3 | 15.4 | 9.9  |
| <b>Colombia</b>                         | 6.6  | 28   | 40.1 | 13.8 | 11.5 |
| <b>Costa Rica</b>                       | 6.1  | 28.8 | 41.4 | 15.6 | 8    |
| <b>El Salvador</b>                      | 6.9  | 31.1 | 37.1 | 15.8 | 9.1  |
| <b>Guatemala</b>                        | 8    | 33.5 | 32.3 | 13.8 | 12.4 |
| <b>Honduras</b>                         | 7.2  | 32.4 | 31.8 | 15.1 | 13.5 |
| <b>Mexico</b>                           | 6.1  | 32.4 | 36.5 | 15.6 | 9.4  |
| <b>Nicaragua</b>                        | 6.9  | 31.6 | 35.6 | 16.9 | 9.1  |
| <b>Panama</b>                           | 6.7  | 30.4 | 37.7 | 13.2 | 12.1 |
| <b>Venezuela</b>                        | 6.8  | 30   | 38.5 | 16.5 | 8.3  |
| <b>Andean Latin America</b>             | 11.9 | 14   | 38   | 21   | 15.1 |
| <b>Bolivia</b>                          | 11.5 | 14.1 | 36.1 | 21.1 | 17.1 |
| <b>Ecuador</b>                          | 12.2 | 14.9 | 33.1 | 24   | 15.8 |
| <b>Peru</b>                             | 11.8 | 13.5 | 41.6 | 19.2 | 13.9 |
| <b>Caribbean</b>                        | 11.1 | 23   | 34.8 | 18.4 | 12.7 |
| <b>Antigua and Barbuda</b>              | 10.3 | 22.6 | 33.6 | 21.6 | 11.8 |
| <b>The Bahamas</b>                      | 10.7 | 23.1 | 36.6 | 18.7 | 11   |
| <b>Barbados</b>                         | 10.6 | 22.7 | 34.9 | 21.5 | 10.3 |
| <b>Belize</b>                           | 10.9 | 22.5 | 33.9 | 19.5 | 13.2 |
| <b>Bermuda</b>                          | 11   | 20.7 | 36.9 | 21.9 | 9.5  |
| <b>Cuba</b>                             | 10.5 | 23.7 | 35.5 | 20.4 | 9.9  |
| <b>Dominica</b>                         | 10.7 | 22.3 | 35.1 | 19.2 | 12.6 |
| <b>Dominican Republic</b>               | 10.9 | 22.3 | 35.1 | 17.2 | 14.4 |
| <b>Grenada</b>                          | 10.6 | 22.9 | 36.2 | 19.2 | 11.1 |
| <b>Guyana</b>                           | 11   | 23.4 | 35.5 | 18.7 | 11.4 |
| <b>Haiti</b>                            | 12.5 | 23.4 | 33.9 | 14.9 | 15.3 |
| <b>Jamaica</b>                          | 10.9 | 23   | 31.5 | 19.3 | 15.3 |
| <b>Puerto Rico</b>                      | 10.2 | 22.3 | 35.4 | 21.8 | 10.3 |
| <b>Saint Lucia</b>                      | 10.3 | 22.5 | 35.3 | 21.1 | 10.8 |
| <b>Saint Vincent and the Grenadines</b> | 10.4 | 21.9 | 34.3 | 23.9 | 9.6  |

|                                |      |      |      |      |      |
|--------------------------------|------|------|------|------|------|
| Suriname                       | 11.3 | 22.6 | 35.1 | 19   | 11.9 |
| Trinidad and Tobago            | 11.2 | 22.9 | 32.9 | 21.6 | 11.4 |
| Virgin Islands                 | 10.1 | 21.8 | 37.4 | 21.3 | 9.5  |
| <b>Tropical Latin America</b>  | 16.4 | 27   | 22.6 | 21.7 | 12.3 |
| Brazil                         | 16.4 | 27.1 | 22.5 | 21.7 | 12.3 |
| Paraguay                       | 16.4 | 23.9 | 27.1 | 19.5 | 13.1 |
| <b>East Asia</b>               | 48.9 | 22.3 | 18.1 | 7    | 3.7  |
| China                          | 49   | 22.1 | 18.1 | 7.1  | 3.7  |
| North Korea                    | 50.3 | 23.4 | 17   | 5.2  | 4.1  |
| Taiwan (province of China)     | 44.8 | 26   | 18.9 | 7.3  | 3    |
| <b>Southeast Asia</b>          | 33.5 | 34.5 | 14.6 | 8.9  | 8.5  |
| Cambodia                       | 35.3 | 29   | 15.9 | 9.1  | 10.6 |
| Indonesia                      | 28.8 | 41.7 | 11.3 | 9    | 9.2  |
| Laos                           | 37.9 | 27   | 17.2 | 7.9  | 10.1 |
| Malaysia                       | 44.2 | 19.7 | 18.1 | 11.8 | 6.3  |
| Maldives                       | 35.4 | 29   | 16.4 | 11.5 | 7.6  |
| Mauritius                      | 35   | 29.3 | 19   | 10.7 | 5.9  |
| Myanmar                        | 38.4 | 29.8 | 15.4 | 7.5  | 9    |
| Philippines                    | 36.5 | 28.5 | 18.3 | 8.2  | 8.6  |
| Sri Lanka                      | 36.4 | 30.7 | 17.8 | 8.4  | 6.6  |
| Seychelles                     | 35.1 | 29.5 | 17.7 | 12.1 | 5.5  |
| Thailand                       | 35   | 28.1 | 17.8 | 12.7 | 6.5  |
| East Timor                     | 37.4 | 28.2 | 14.7 | 8    | 11.7 |
| Vietnam                        | 38.6 | 28.5 | 18.8 | 7.1  | 7    |
| <b>Oceania</b>                 | 43.7 | 22.8 | 14.6 | 6.5  | 12.4 |
| American Samoa                 | 41.1 | 21.1 | 13.7 | 15   | 9.1  |
| Federated States of Micronesia | 41.5 | 23   | 14.2 | 10   | 11.3 |
| Fiji                           | 40.2 | 23.6 | 14.7 | 9.6  | 11.9 |
| Guam                           | 43.1 | 22.3 | 16.6 | 10.8 | 7.3  |
| Kiribati                       | 43.1 | 21.8 | 13   | 9.5  | 12.5 |
| Marshall Islands               | 42.8 | 22.3 | 14.2 | 10   | 10.6 |
| Northern Mariana Islands       | 43   | 23.2 | 16.1 | 10.9 | 6.8  |
| Papua New Guinea               | 43.9 | 22.8 | 14.7 | 5.9  | 12.7 |
| Samoa                          | 41.4 | 21.8 | 14.2 | 11.3 | 11.2 |
| Solomon Islands                | 43.4 | 23.3 | 14.5 | 8    | 10.8 |

|                                     |      |      |      |      |      |
|-------------------------------------|------|------|------|------|------|
| <b>Tonga</b>                        | 39.7 | 21.9 | 13.9 | 12.3 | 12.2 |
| <b>Vanuatu</b>                      | 44.8 | 22.9 | 13.7 | 7.4  | 11.3 |
| <b>North Africa and Middle East</b> | 36.1 | 34.4 | 5.1  | 11.9 | 12.6 |
| <b>Afghanistan</b>                  | 28.2 | 29.7 | 4.3  | 7.1  | 30.8 |
| <b>Algeria</b>                      | 29.7 | 37.8 | 5.8  | 11.9 | 14.8 |
| <b>Bahrain</b>                      | 30.3 | 40.1 | 7    | 14.7 | 7.9  |
| <b>Egypt</b>                        | 40.6 | 34.1 | 4.7  | 12   | 8.6  |
| <b>Iran</b>                         | 27.7 | 41.9 | 4.9  | 12.4 | 13.1 |
| <b>Iraq</b>                         | 27.4 | 32.1 | 4.8  | 10.1 | 25.6 |
| <b>Jordan</b>                       | 27.8 | 35.6 | 5.4  | 13.9 | 17.3 |
| <b>Kuwait</b>                       | 29.1 | 39.4 | 6.3  | 17.5 | 7.7  |
| <b>Lebanon</b>                      | 32.9 | 35   | 5.5  | 12.3 | 14.3 |
| <b>Libya</b>                        | 28.4 | 36   | 5.5  | 15   | 15.1 |
| <b>Morocco</b>                      | 29.6 | 37.7 | 5.6  | 12   | 15   |
| <b>Palestine</b>                    | 28.3 | 34.8 | 5.1  | 11.3 | 20.4 |
| <b>Oman</b>                         | 29.6 | 38.2 | 6.1  | 14.1 | 12   |
| <b>Qatar</b>                        | 30.4 | 38.6 | 6.6  | 15.9 | 8.5  |
| <b>Saudi Arabia</b>                 | 21.6 | 49   | 6.1  | 15.5 | 7.8  |
| <b>Sudan</b>                        | 28.5 | 31.4 | 5.2  | 8.8  | 26   |
| <b>Syria</b>                        | 29.3 | 36.1 | 5.5  | 12.1 | 17   |
| <b>Tunisia</b>                      | 12.7 | 51.8 | 7.2  | 15.3 | 12.9 |
| <b>Turkey</b>                       | 52.4 | 16.6 | 6.4  | 13.6 | 11   |
| <b>United Arab Emirates</b>         | 31.6 | 41.6 | 7.6  | 14.6 | 4.6  |
| <b>Yemen</b>                        | 27.6 | 33.9 | 5.1  | 7.8  | 25.7 |
| <b>South Asia</b>                   | 32.8 | 20.3 | 27.4 | 4.9  | 14.5 |
| <b>Bangladesh</b>                   | 27.6 | 23.5 | 25   | 5.1  | 18.7 |
| <b>Bhutan</b>                       | 29.5 | 22.6 | 27.6 | 5.4  | 14.9 |
| <b>India</b>                        | 35.3 | 16.3 | 31.5 | 4.8  | 12.1 |
| <b>Nepal</b>                        | 22.6 | 14.8 | 44   | 4.6  | 13.9 |
| <b>Pakistan</b>                     | 25.7 | 36.8 | 9    | 5.4  | 23.1 |
| <b>Southern sub-Saharan Africa</b>  | 21.8 | 32.8 | 18.9 | 8.9  | 17.6 |
| <b>Botswana</b>                     | 21.4 | 34.3 | 18.5 | 8    | 17.8 |
| <b>eSwatini</b>                     | 22.7 | 34.5 | 17.1 | 8    | 17.6 |
| <b>Lesotho</b>                      | 22.6 | 34.5 | 18.6 | 7.4  | 16.9 |
| <b>Namibia</b>                      | 23.5 | 33.3 | 20   | 6.1  | 17   |

|                                   |      |      |      |      |      |
|-----------------------------------|------|------|------|------|------|
| <b>South Africa</b>               | 21   | 32.6 | 19.9 | 10.1 | 16.3 |
| <b>Zimbabwe</b>                   | 23.7 | 32.7 | 16   | 6.1  | 21.5 |
| <b>Western sub-Saharan Africa</b> | 46   | 7.2  | 18   | 5.5  | 23.4 |
| <b>Benin</b>                      | 46.5 | 7.1  | 15   | 6.1  | 25.3 |
| <b>Burkina Faso</b>               | 45.2 | 6.9  | 15.3 | 5.1  | 27.5 |
| <b>Cameroon</b>                   | 47.6 | 7.7  | 17.3 | 7.1  | 20.2 |
| <b>Cape Verde</b>                 | 49.5 | 8.6  | 19.3 | 7.2  | 15.4 |
| <b>Chad</b>                       | 50.9 | 6.7  | 14.1 | 4.3  | 23.9 |
| <b>Côte d'Ivoire</b>              | 49.4 | 7.6  | 16.9 | 5.6  | 20.6 |
| <b>The Gambia</b>                 | 49.2 | 7.5  | 15.8 | 5.9  | 21.5 |
| <b>Ghana</b>                      | 47.2 | 8.3  | 17.2 | 6.9  | 20.4 |
| <b>Guinea</b>                     | 50.5 | 7.1  | 14.1 | 5    | 23.3 |
| <b>Guinea-Bissau</b>              | 51.6 | 6.9  | 14.6 | 5.9  | 21   |
| <b>Liberia</b>                    | 49.9 | 6.7  | 14.6 | 5.9  | 22.9 |
| <b>Mali</b>                       | 44.7 | 6.4  | 10.7 | 4.6  | 33.5 |
| <b>Mauritania</b>                 | 48.9 | 7.8  | 13.4 | 7.4  | 22.5 |
| <b>Niger</b>                      | 47.3 | 6.2  | 11.4 | 4.2  | 30.9 |
| <b>Nigeria</b>                    | 44.6 | 7.1  | 19.7 | 5.3  | 23.3 |
| <b>São Tomé and Príncipe</b>      | 49.1 | 7.7  | 17.4 | 6.2  | 19.6 |
| <b>Senegal</b>                    | 51   | 7.4  | 12.8 | 5.7  | 23   |
| <b>Sierra Leone</b>               | 48.9 | 7.3  | 16.7 | 5.5  | 21.5 |
| <b>Togo</b>                       | 52.5 | 7.6  | 14.5 | 5.6  | 19.8 |
| <b>Eastern sub-Saharan Africa</b> | 25.6 | 27.3 | 19   | 6.4  | 21.7 |
| <b>Burundi</b>                    | 23.1 | 29.5 | 22.1 | 5.9  | 19.4 |
| <b>Comoros</b>                    | 24.5 | 31.1 | 16.7 | 7.2  | 20.6 |
| <b>Djibouti</b>                   | 25.7 | 29.4 | 19.1 | 7.7  | 18   |
| <b>Eritrea</b>                    | 25.1 | 30   | 18.7 | 5.7  | 20.5 |
| <b>Ethiopia</b>                   | 28.9 | 32   | 15   | 5    | 19.1 |
| <b>Kenya</b>                      | 28.2 | 13.3 | 26.4 | 9.4  | 22.7 |
| <b>Madagascar</b>                 | 24.7 | 29.9 | 18.2 | 5.9  | 21.3 |
| <b>Malawi</b>                     | 25.1 | 28.5 | 17   | 6.2  | 23.2 |
| <b>Mozambique</b>                 | 25.1 | 24.7 | 16.3 | 5.7  | 28.1 |
| <b>Rwanda</b>                     | 14.3 | 44.9 | 18.2 | 5.1  | 17.5 |
| <b>Somalia</b>                    | 25.8 | 28.6 | 17.5 | 6.1  | 22   |
| <b>South Sudan</b>                | 26.5 | 27.4 | 18   | 6.6  | 21.4 |

|                                   |      |      |      |     |      |
|-----------------------------------|------|------|------|-----|------|
| <b>Tanzania</b>                   | 21.9 | 27.2 | 18.3 | 6.5 | 26.2 |
| <b>Uganda</b>                     | 22.7 | 27.7 | 21.4 | 6   | 22.2 |
| <b>Zambia</b>                     | 24.8 | 28.9 | 18.3 | 6.3 | 21.7 |
| <b>Central sub-Saharan Africa</b> | 30.7 | 30.3 | 15.4 | 5.1 | 18.5 |
| <b>Angola</b>                     | 29.6 | 30.1 | 15.8 | 6   | 18.4 |
| <b>Central African Republic</b>   | 32.1 | 30.5 | 15.4 | 4.8 | 17.2 |
| <b>Congo</b>                      | 30.4 | 31.7 | 16.4 | 5.9 | 15.6 |
| <b>DR Congo</b>                   | 31.2 | 30.2 | 15.1 | 4.6 | 18.9 |
| <b>Equatorial Guinea</b>          | 29.3 | 29.1 | 16.1 | 8.1 | 17.4 |
| <b>Gabon</b>                      | 28.4 | 32.7 | 17.8 | 6.9 | 14.1 |

**Appendix Table 11: Number of deaths and age-standardised death rates of cirrhosis due to hepatitis B per 100 000 in 1990 and 2017 for both sexes and the percentage change by location**

|                                  | 1990                       |                    | 2017                       |                   | Percentage change in age-standardised rates between 1990 and 2017 |
|----------------------------------|----------------------------|--------------------|----------------------------|-------------------|-------------------------------------------------------------------|
|                                  | Counts (95% UI)            | Rate (95% UI)      | Counts (95% UI)            | Rate (95% UI)     |                                                                   |
| <b>Global</b>                    | 287011<br>(251678, 318059) | 6.7<br>(5.8, 7.4)  | 383971<br>(349069, 441666) | 4.8<br>(4.3, 5.5) | -28.3<br>(-35.9, -15.2)                                           |
| <b>High-income North America</b> | 2647<br>(2442, 2856)       | 0.8<br>(0.7, 0.8)  | 3871<br>(3529, 4215)       | 0.7<br>(0.6, 0.7) | -11.6<br>(-15.6, -7.4)                                            |
| <b>Canada</b>                    | 186<br>(164, 212)          | 0.6<br>(0.5, 0.6)  | 289<br>(249, 332)          | 0.5<br>(0.4, 0.5) | -20.1<br>(-27.3, -12.2)                                           |
| <b>Greenland</b>                 | 0<br>(0, 0)                | 0.6<br>(0.5, 0.7)  | 0<br>(0, 1)                | 0.6<br>(0.4, 0.7) | 0.8<br>(-29.2, 29.2)                                              |
| <b>USA</b>                       | 2461<br>(2275, 2649)       | 0.8<br>(0.7, 0.9)  | 3582<br>(3265, 3894)       | 0.7<br>(0.7, 0.8) | -10.8<br>(-14.9, -6.2)                                            |
| <b>Australasia</b>               | 298<br>(268, 331)          | 1.3<br>(1.2, 1.4)  | 414<br>(356, 477)          | 0.9<br>(0.8, 1)   | -29.3<br>(-37.2, -19.6)                                           |
| <b>Australia</b>                 | 259<br>(231, 289)          | 1.3<br>(1.2, 1.5)  | 363<br>(307, 423)          | 0.9<br>(0.8, 1.1) | -29.1<br>(-37.9, -18.1)                                           |
| <b>New Zealand</b>               | 38<br>(35, 42)             | 1<br>(0.9, 1.1)    | 51<br>(45, 56)             | 0.7<br>(0.6, 0.8) | -31.3<br>(-37.1, -24.8)                                           |
| <b>High-income Asia Pacific</b>  | 9377<br>(8606, 10190)      | 4.6<br>(4.2, 5)    | 7449<br>(6608, 8318)       | 1.9<br>(1.7, 2.2) | -58.3<br>(-62.6, -54.2)                                           |
| <b>Brunei</b>                    | 5<br>(4, 7)                | 4.1<br>(3.2, 5.2)  | 8<br>(6, 11)               | 2.2<br>(1.7, 3.1) | -46.7<br>(-57.2, -24.5)                                           |
| <b>Japan</b>                     | 3486<br>(3225, 3746)       | 2.1<br>(1.9, 2.2)  | 4021<br>(3651, 4389)       | 1.2<br>(1.1, 1.3) | -42.6<br>(-46.5, -39.3)                                           |
| <b>Singapore</b>                 | 111<br>(101, 121)          | 4.6<br>(4.1, 5)    | 138<br>(120, 158)          | 2<br>(1.7, 2.3)   | -56.9<br>(-61.6, -51.9)                                           |
| <b>South Korea</b>               | 5774<br>(5173, 6419)       | 16.6<br>(15, 18.4) | 3282<br>(2732, 3887)       | 3.9<br>(3.3, 4.6) | -76.4<br>(-79.9, -72.6)                                           |
| <b>Western Europe</b>            | 7532<br>(6299, 8975)       | 1.4<br>(1.2, 1.6)  | 6027<br>(4964, 7272)       | 0.7<br>(0.6, 0.9) | -46<br>(-49.6, -42.4)                                             |

|                    |                      |                   |                      |                   |                         |
|--------------------|----------------------|-------------------|----------------------|-------------------|-------------------------|
| <b>Andorra</b>     | 1<br>(0, 1)          | 0.9<br>(0.6, 1.3) | 1<br>(1, 1)          | 0.6<br>(0.4, 0.9) | -36<br>(-52.2, -14.8)   |
| <b>Austria</b>     | 185<br>(144, 233)    | 1.7<br>(1.4, 2.2) | 133<br>(103, 171)    | 0.8<br>(0.7, 1.1) | -51.4<br>(-56.8, -45.4) |
| <b>Belgium</b>     | 191<br>(155, 234)    | 1.3<br>(1.1, 1.6) | 192<br>(152, 238)    | 0.9<br>(0.7, 1.2) | -29.3<br>(-38, -21.4)   |
| <b>Cyprus</b>      | 8<br>(6, 11)         | 1<br>(0.7, 1.4)   | 10<br>(7, 13)        | 0.5<br>(0.4, 0.7) | -46.2<br>(-59.9, -29.9) |
| <b>Denmark</b>     | 64<br>(51, 81)       | 0.9<br>(0.7, 1.2) | 79<br>(62, 102)      | 0.8<br>(0.6, 1)   | -14.6<br>(-26.1, -1.1)  |
| <b>Finland</b>     | 54<br>(43, 68)       | 0.8<br>(0.6, 1)   | 105<br>(80, 138)     | 1.1<br>(0.9, 1.5) | 39.3<br>(19.9, 60.8)    |
| <b>France</b>      | 1087<br>(867, 1348)  | 1.4<br>(1.1, 1.8) | 840<br>(646, 1083)   | 0.7<br>(0.6, 0.9) | -49.2<br>(-55.7, -42.7) |
| <b>Germany</b>     | 1704<br>(1349, 2119) | 1.5<br>(1.2, 1.8) | 1440<br>(1081, 1863) | 0.9<br>(0.7, 1.2) | -38.9<br>(-47.4, -29.7) |
| <b>Greece</b>      | 184<br>(143, 233)    | 1.2<br>(1, 1.5)   | 132<br>(103, 166)    | 0.6<br>(0.5, 0.8) | -50.1<br>(-55.9, -43.2) |
| <b>Iceland</b>     | 1<br>(1, 1)          | 0.3<br>(0.3, 0.4) | 1<br>(1, 2)          | 0.3<br>(0.2, 0.4) | -16<br>(-25.5, -4.4)    |
| <b>Ireland</b>     | 17<br>(14, 21)       | 0.4<br>(0.3, 0.5) | 34<br>(27, 43)       | 0.5<br>(0.4, 0.6) | 16<br>(-0.1, 32)        |
| <b>Israel</b>      | 40<br>(31, 51)       | 0.8<br>(0.6, 1)   | 61<br>(48, 78)       | 0.5<br>(0.4, 0.7) | -33.7<br>(-40.7, -25.8) |
| <b>Italy</b>       | 2123<br>(1870, 2413) | 2.4<br>(2.1, 2.7) | 1268<br>(1072, 1492) | 0.9<br>(0.8, 1.1) | -62.8<br>(-67.1, -58.4) |
| <b>Luxembourg</b>  | 8<br>(7, 11)         | 1.6<br>(1.3, 2)   | 7<br>(6, 10)         | 0.8<br>(0.6, 1)   | -50.1<br>(-59.2, -40.4) |
| <b>Malta</b>       | 3<br>(3, 4)          | 0.8<br>(0.6, 0.9) | 4<br>(3, 5)          | 0.5<br>(0.4, 0.6) | -39.5<br>(-46.2, -30.7) |
| <b>Netherlands</b> | 124<br>(100, 152)    | 0.6<br>(0.5, 0.8) | 141<br>(109, 183)    | 0.4<br>(0.3, 0.6) | -31<br>(-38.2, -23.6)   |

|                               |                      |                      |                         |                   |                         |
|-------------------------------|----------------------|----------------------|-------------------------|-------------------|-------------------------|
| <b>Norway</b>                 | 31<br>(27, 35)       | 0.5<br>(0.4, 0.6)    | 32<br>(28, 37)          | 0.4<br>(0.3, 0.4) | -28.7<br>(-36.4, -22.7) |
| <b>Portugal</b>               | 315<br>(249, 394)    | 2.4<br>(1.9, 3)      | 170<br>(131, 218)       | 0.8<br>(0.7, 1.1) | -65<br>(-69.1, -60.1)   |
| <b>Spain</b>                  | 938<br>(753, 1170)   | 1.8<br>(1.4, 2.2)    | 618<br>(486, 776)       | 0.7<br>(0.5, 0.8) | -62<br>(-66.1, -57.8)   |
| <b>Sweden</b>                 | 72<br>(64, 81)       | 0.5<br>(0.5, 0.6)    | 93<br>(80, 108)         | 0.5<br>(0.4, 0.6) | -8.5<br>(-16.3, 0.6)    |
| <b>Switzerland</b>            | 71<br>(56, 89)       | 0.7<br>(0.6, 0.9)    | 82<br>(64, 105)         | 0.5<br>(0.4, 0.7) | -28.5<br>(-38.1, -17.3) |
| <b>UK</b>                     | 303<br>(269, 339)    | 0.4<br>(0.3, 0.4)    | 577<br>(506, 648)       | 0.6<br>(0.5, 0.6) | 47.8<br>(41.7, 57.5)    |
| <b>Southern Latin America</b> | 1381<br>(1185, 1608) | 2.9<br>(2.5, 3.4)    | 1648<br>(1361, 1953)    | 2<br>(1.7, 2.4)   | -30<br>(-36.8, -22.4)   |
| <b>Argentina</b>              | 750<br>(640, 875)    | 2.3<br>(2, 2.7)      | 939<br>(765, 1127)      | 1.8<br>(1.5, 2.2) | -21.8<br>(-32.5, -10.2) |
| <b>Chile</b>                  | 553<br>(462, 652)    | 5.1<br>(4.3, 6.1)    | 643<br>(525, 778)       | 2.8<br>(2.3, 3.4) | -45.9<br>(-53.1, -37.4) |
| <b>Uruguay</b>                | 78<br>(66, 92)       | 2<br>(1.7, 2.4)      | 67<br>(54, 80)          | 1.3<br>(1, 1.5)   | -37.1<br>(-45.8, -27.1) |
| <b>Eastern Europe</b>         | 6291<br>(5711, 6938) | 2.3<br>(2.1, 2.5)    | 14211<br>(12984, 15516) | 4.8<br>(4.4, 5.2) | 112.5<br>(102.8, 124.2) |
| <b>Belarus</b>                | 168<br>(142, 201)    | 1.3<br>(1.1, 1.5)    | 424<br>(353, 505)       | 3<br>(2.5, 3.5)   | 130<br>(91.4, 168)      |
| <b>Estonia</b>                | 28<br>(24, 33)       | 1.4<br>(1.2, 1.7)    | 47<br>(38, 58)          | 2.4<br>(1.9, 2.9) | 66.9<br>(37.4, 97.5)    |
| <b>Latvia</b>                 | 48<br>(41, 57)       | 1.4<br>(1.2, 1.6)    | 73<br>(61, 87)          | 2.4<br>(2, 2.9)   | 76.6<br>(50.4, 106.1)   |
| <b>Lithuania</b>              | 71<br>(61, 83)       | 1.6<br>(1.4, 1.9)    | 158<br>(134, 185)       | 3.7<br>(3.2, 4.4) | 134.1<br>(110.6, 161.2) |
| <b>Moldova</b>                | 640<br>(552, 745)    | 13.6<br>(11.8, 15.7) | 555<br>(469, 644)       | 10<br>(8.6, 11.5) | -26<br>(-32.7, -19.6)   |



|                               |                      |                     |                      |                   |                         |
|-------------------------------|----------------------|---------------------|----------------------|-------------------|-------------------------|
| <b>Russia</b>                 | 3635<br>(3230, 4046) | 2<br>(1.8, 2.2)     | 9199<br>(8434, 9943) | 4.5<br>(4.1, 4.8) | 122.7<br>(109.8, 146.2) |
| <b>Ukraine</b>                | 1701<br>(1548, 1888) | 2.4<br>(2.2, 2.7)   | 3756<br>(3344, 4178) | 6<br>(5.4, 6.7)   | 147.9<br>(120.4, 175.5) |
| <b>Central Europe</b>         | 7615<br>(6833, 8501) | 5.1<br>(4.6, 5.7)   | 6919<br>(6134, 7770) | 3.6<br>(3.2, 4.1) | -28.4<br>(-32, -25)     |
| <b>Albania</b>                | 72<br>(61, 82)       | 3.3<br>(2.7, 3.7)   | 78<br>(60, 106)      | 1.9<br>(1.5, 2.6) | -40.6<br>(-55.3, -12.4) |
| <b>Bosnia and Herzegovina</b> | 217<br>(190, 260)    | 4.8<br>(4.2, 5.6)   | 148<br>(120, 209)    | 2.6<br>(2.1, 3.7) | -47<br>(-54.7, -32.5)   |
| <b>Bulgaria</b>               | 483<br>(427, 550)    | 3.9<br>(3.5, 4.4)   | 469<br>(407, 538)    | 3.8<br>(3.3, 4.4) | -2<br>(-12.3, 9)        |
| <b>Croatia</b>                | 459<br>(405, 518)    | 7<br>(6.3, 7.8)     | 254<br>(218, 293)    | 3.2<br>(2.8, 3.7) | -54.2<br>(-58.3, -49.4) |
| <b>Czech Republic</b>         | 549<br>(489, 624)    | 4.1<br>(3.7, 4.7)   | 462<br>(399, 531)    | 2.6<br>(2.2, 3)   | -37.9<br>(-44.5, -30.6) |
| <b>Hungary</b>                | 1469<br>(1314, 1641) | 10.7<br>(9.6, 11.9) | 791<br>(679, 914)    | 4.7<br>(4.1, 5.4) | -55.8<br>(-59.9, -50.9) |
| <b>Montenegro</b>             | 10<br>(9, 12)        | 1.6<br>(1.3, 1.9)   | 12<br>(9, 14)        | 1.3<br>(1, 1.5)   | -21.1<br>(-36.8, -3.9)  |
| <b>North Macedonia</b>        | 43<br>(37, 51)       | 2.2<br>(1.9, 2.6)   | 59<br>(47, 70)       | 1.8<br>(1.4, 2.1) | -18.1<br>(-32.6, -3.4)  |
| <b>Poland</b>                 | 1221<br>(1084, 1397) | 2.7<br>(2.4, 3.1)   | 1692<br>(1460, 1963) | 2.8<br>(2.4, 3.3) | 3.5<br>(-8.7, 15.4)     |
| <b>Romania</b>                | 2065<br>(1839, 2342) | 7.3<br>(6.5, 8.2)   | 2199<br>(1908, 2519) | 6.6<br>(5.8, 7.5) | -8.8<br>(-16.7, -0.5)   |
| <b>Serbia</b>                 | 414<br>(321, 503)    | 3.5<br>(2.7, 4.2)   | 301<br>(257, 353)    | 2.1<br>(1.8, 2.4) | -40.2<br>(-50.6, -24.5) |
| <b>Slovakia</b>               | 415<br>(350, 519)    | 7<br>(5.9, 8.7)     | 332<br>(266, 394)    | 3.9<br>(3.1, 4.6) | -44.2<br>(-59.8, -31.9) |
| <b>Slovenia</b>               | 197<br>(174, 222)    | 7.9<br>(7, 8.9)     | 122<br>(105, 144)    | 3.3<br>(2.8, 3.8) | -58.7<br>(-63.3, -54.2) |

|                                  |                      |                      |                      |                      |                         |
|----------------------------------|----------------------|----------------------|----------------------|----------------------|-------------------------|
| <b>Central Asia</b>              | 3146<br>(2772, 3579) | 6.3<br>(5.5, 7.1)    | 6755<br>(5861, 7734) | 8.4<br>(7.4, 9.6)    | 34.8<br>(24.2, 44.1)    |
| <b>Armenia</b>                   | 103<br>(89, 119)     | 3.7<br>(3.2, 4.2)    | 236<br>(200, 270)    | 5.8<br>(5, 6.7)      | 58.6<br>(43.8, 75.4)    |
| <b>Azerbaijan</b>                | 343<br>(300, 390)    | 6.5<br>(5.6, 7.4)    | 701<br>(554, 864)    | 8<br>(6.2, 10.1)     | 23.2<br>(3.2, 51.4)     |
| <b>Georgia</b>                   | 354<br>(306, 410)    | 5.6<br>(4.9, 6.4)    | 302<br>(253, 360)    | 5.7<br>(4.7, 6.8)    | 0.2<br>(-10.9, 13.3)    |
| <b>Kazakhstan</b>                | 502<br>(437, 584)    | 3.7<br>(3.3, 4.3)    | 1409<br>(1113, 1688) | 7.9<br>(6.3, 9.4)    | 110.8<br>(74.2, 142.2)  |
| <b>Kyrgyzstan</b>                | 263<br>(231, 300)    | 8.3<br>(7.2, 9.4)    | 494<br>(414, 577)    | 9.7<br>(8.2, 11.3)   | 17<br>(1.9, 29.2)       |
| <b>Mongolia</b>                  | 177<br>(149, 215)    | 15.7<br>(13.5, 18.7) | 302<br>(253, 359)    | 13.3<br>(10.9, 15.6) | -15.2<br>(-32.5, -1.5)  |
| <b>Tajikistan</b>                | 181<br>(156, 230)    | 5.8<br>(4.9, 7.5)    | 334<br>(282, 399)    | 5.4<br>(4.6, 6.6)    | -5.8<br>(-17.2, 7)      |
| <b>Turkmenistan</b>              | 207<br>(184, 234)    | 9.6<br>(8.4, 10.8)   | 526<br>(441, 612)    | 11.5<br>(9.7, 13.2)  | 19.8<br>(5.4, 34.6)     |
| <b>Uzbekistan</b>                | 1016<br>(895, 1154)  | 8<br>(7.1, 9.1)      | 2452<br>(2063, 2897) | 9.6<br>(8.1, 11.3)   | 19.3<br>(5.1, 34.7)     |
| <b>Central Latin<br/>America</b> | 2342<br>(2169, 2509) | 2.4<br>(2.2, 2.6)    | 3720<br>(3390, 4064) | 1.6<br>(1.4, 1.7)    | -34.8<br>(-38.2, -30.7) |
| <b>Colombia</b>                  | 155<br>(139, 172)    | 0.8<br>(0.7, 0.9)    | 266<br>(224, 315)    | 0.5<br>(0.4, 0.6)    | -40.6<br>(-47.9, -31.4) |
| <b>Costa Rica</b>                | 22<br>(20, 25)       | 1.2<br>(1.1, 1.3)    | 52<br>(44, 61)       | 1.1<br>(0.9, 1.2)    | -10.3<br>(-20.3, 2.5)   |
| <b>El Salvador</b>               | 74<br>(62, 84)       | 2.2<br>(1.9, 2.5)    | 99<br>(78, 131)      | 1.7<br>(1.3, 2.3)    | -22.8<br>(-38.8, 8.6)   |
| <b>Guatemala</b>                 | 176<br>(160, 195)    | 3.8<br>(3.5, 4.3)    | 353<br>(304, 410)    | 2.9<br>(2.5, 3.3)    | -24.6<br>(-34.2, -13.7) |
| <b>Honduras</b>                  | 80<br>(64, 113)      | 3.2<br>(2.6, 4.4)    | 168<br>(124, 235)    | 2.6<br>(1.9, 3.6)    | -19.1<br>(-38.3, 1.4)   |

|                             |                      |                   |                      |                   |                         |
|-----------------------------|----------------------|-------------------|----------------------|-------------------|-------------------------|
| <b>Mexico</b>               | 1633<br>(1516, 1741) | 3.2<br>(3, 3.5)   | 2420<br>(2214, 2624) | 2.1<br>(1.9, 2.2) | -36.3<br>(-39.6, -32.5) |
| <b>Nicaragua</b>            | 34<br>(29, 39)       | 1.8<br>(1.6, 2.1) | 75<br>(54, 89)       | 1.5<br>(1.1, 1.8) | -16.7<br>(-36.4, -2.2)  |
| <b>Panama</b>               | 16<br>(14, 18)       | 1<br>(0.9, 1.1)   | 31<br>(27, 36)       | 0.8<br>(0.7, 0.9) | -22.8<br>(-30.9, -14)   |
| <b>Venezuela</b>            | 152<br>(137, 170)    | 1.4<br>(1.3, 1.6) | 256<br>(209, 315)    | 0.9<br>(0.7, 1.1) | -36.7<br>(-47.4, -23.7) |
| <b>Andean Latin America</b> | 809<br>(704, 938)    | 3.6<br>(3.1, 4.2) | 1311<br>(1129, 1528) | 2.4<br>(2.1, 2.8) | -32.6<br>(-41.7, -23.7) |
| <b>Bolivia</b>              | 152<br>(110, 206)    | 4.5<br>(3.2, 6)   | 257<br>(196, 339)    | 3<br>(2.3, 4)     | -32.5<br>(-48, -8.1)    |
| <b>Ecuador</b>              | 218<br>(195, 243)    | 3.7<br>(3.3, 4.1) | 412<br>(352, 476)    | 2.8<br>(2.4, 3.2) | -23.2<br>(-32.1, -12.6) |
| <b>Peru</b>                 | 439<br>(375, 510)    | 3.3<br>(2.8, 3.9) | 641<br>(516, 789)    | 2.1<br>(1.7, 2.6) | -37.4<br>(-49.3, -24.1) |
| <b>Caribbean</b>            | 679<br>(586, 782)    | 2.5<br>(2.1, 2.9) | 800<br>(671, 982)    | 1.6<br>(1.3, 1.9) | -36.6<br>(-43.3, -20.9) |
| <b>Antigua and Barbuda</b>  | 1<br>(1, 1)          | 2.1<br>(1.8, 2.4) | 1<br>(1, 1)          | 1.1<br>(0.9, 1.3) | -46.3<br>(-52.5, -38.7) |
| <b>The Bahamas</b>          | 5<br>(4, 5)          | 2.6<br>(2.3, 3)   | 6<br>(5, 7)          | 1.4<br>(1.2, 1.6) | -46.1<br>(-53.1, -38.2) |
| <b>Barbados</b>             | 4<br>(4, 5)          | 1.6<br>(1.3, 1.8) | 4<br>(3, 5)          | 0.9<br>(0.7, 1)   | -43.4<br>(-50.4, -34.9) |
| <b>Belize</b>               | 3<br>(2, 3)          | 2.6<br>(2.2, 3)   | 6<br>(5, 7)          | 2.1<br>(1.8, 2.5) | -18.4<br>(-27, -8.3)    |
| <b>Bermuda</b>              | 1<br>(1, 1)          | 1.5<br>(1.3, 1.7) | 1<br>(1, 1)          | 0.6<br>(0.5, 0.8) | -56.7<br>(-63.2, -46.5) |
| <b>Cuba</b>                 | 139<br>(122, 159)    | 1.3<br>(1.2, 1.5) | 194<br>(160, 235)    | 1.1<br>(0.9, 1.3) | -17.9<br>(-28.7, -6.2)  |
| <b>Dominica</b>             | 1<br>(1, 1)          | 1.6<br>(1.4, 1.9) | 1<br>(1, 1)          | 1.2<br>(1, 1.3)   | -29.3<br>(-37.8, -20.3) |

|                                             |                         |                   |                          |                   |                         |
|---------------------------------------------|-------------------------|-------------------|--------------------------|-------------------|-------------------------|
| <b>Dominican Republic</b>                   | 167<br>(111, 197)       | 4.1<br>(2.7, 4.9) | 173<br>(127, 294)        | 1.9<br>(1.4, 3.1) | -54.2<br>(-67.4, 3.7)   |
| <b>Grenada</b>                              | 2<br>(2, 2)             | 2.6<br>(2.3, 3)   | 2<br>(2, 2)              | 1.4<br>(1.2, 1.6) | -48.2<br>(-53.9, -42.1) |
| <b>Guyana</b>                               | 22<br>(19, 25)          | 4.8<br>(4.2, 5.4) | 19<br>(15, 23)           | 2.8<br>(2.4, 3.4) | -40.8<br>(-49.9, -30.8) |
| <b>Haiti</b>                                | 126<br>(84, 186)        | 3.6<br>(2.4, 5.5) | 207<br>(142, 313)        | 2.9<br>(2, 4.5)   | -17.8<br>(-36.1, 8.5)   |
| <b>Jamaica</b>                              | 20<br>(17, 23)          | 1.1<br>(0.9, 1.3) | 20<br>(16, 27)           | 0.7<br>(0.6, 0.9) | -35.9<br>(-49.9, -11.2) |
| <b>Puerto Rico</b>                          | 130<br>(113, 147)       | 3.5<br>(3.1, 4)   | 96<br>(82, 111)          | 1.5<br>(1.3, 1.7) | -57.5<br>(-61.9, -51.8) |
| <b>Saint Lucia</b>                          | 3<br>(2, 3)             | 2.8<br>(2.4, 3.2) | 3<br>(2, 3)              | 1.3<br>(1.1, 1.5) | -53.1<br>(-58.3, -47)   |
| <b>Saint Vincent and<br/>the Grenadines</b> | 1<br>(1, 2)             | 2<br>(1.7, 2.3)   | 2<br>(1, 2)              | 1.3<br>(1.1, 1.5) | -34.8<br>(-43.3, -24.3) |
| <b>Suriname</b>                             | 9<br>(8, 10)            | 3.3<br>(2.8, 3.7) | 14<br>(11, 16)           | 2.3<br>(1.9, 2.8) | -28.3<br>(-38.3, -17)   |
| <b>Trinidad and<br/>Tobago</b>              | 19<br>(17, 22)          | 2.1<br>(1.9, 2.4) | 20<br>(15, 25)           | 1.1<br>(0.9, 1.4) | -46.9<br>(-57.5, -34.4) |
| <b>Virgin Islands</b>                       | 2<br>(2, 3)             | 2.6<br>(2.2, 3)   | 3<br>(2, 4)              | 1.7<br>(1.4, 2.1) | -33.6<br>(-46.9, -20.6) |
| <b>Tropical Latin<br/>America</b>           | 4367<br>(4085, 4637)    | 4.1<br>(3.8, 4.3) | 5882<br>(5491, 6297)     | 2.5<br>(2.3, 2.6) | -39.8<br>(-42.5, -37.4) |
| <b>Brazil</b>                               | 4309<br>(4032, 4573)    | 4.1<br>(3.9, 4.4) | 5774<br>(5394, 6174)     | 2.5<br>(2.3, 2.6) | -40.1<br>(-42.7, -37.5) |
| <b>Paraguay</b>                             | 57<br>(47, 79)          | 2.4<br>(2, 3.3)   | 108<br>(82, 163)         | 2<br>(1.5, 2.9)   | -19.3<br>(-38.3, 6.2)   |
| <b>East Asia</b>                            | 87005<br>(70808, 94967) | 8.9<br>(7.3, 9.8) | 81733<br>(74282, 105303) | 4.1<br>(3.7, 5.3) | -54.6<br>(-60.7, -35.6) |
| <b>China</b>                                | 81337<br>(65309, 88976) | 8.8<br>(7.1, 9.6) | 75159<br>(68002, 97674)  | 3.9<br>(3.5, 5.1) | -55.4<br>(-61.7, -35.4) |

|                                   |                         |                      |                         |                      |                         |
|-----------------------------------|-------------------------|----------------------|-------------------------|----------------------|-------------------------|
| <b>North Korea</b>                | 1558<br>(1246, 1955)    | 9<br>(7.2, 11.1)     | 2329<br>(1752, 3011)    | 7.5<br>(5.6, 9.6)    | -16.7<br>(-38.4, 8)     |
| <b>Taiwan (province of China)</b> | 2660<br>(2469, 2851)    | 16.7<br>(15.5, 17.8) | 2928<br>(2661, 3235)    | 8<br>(7.3, 8.8)      | -52.2<br>(-55.7, -48.4) |
| <b>Southeast Asia</b>             | 38833<br>(33051, 44367) | 13.6<br>(11.5, 15.5) | 58253<br>(51057, 66332) | 9.7<br>(8.5, 11)     | -28.6<br>(-36.9, -18.1) |
| <b>Cambodia</b>                   | 1592<br>(1201, 2084)    | 32<br>(24.6, 42.1)   | 3147<br>(2498, 3988)    | 27.5<br>(22, 34.8)   | -14.2<br>(-31.9, 11.2)  |
| <b>Indonesia</b>                  | 17652<br>(15091, 19915) | 16.7<br>(14, 19)     | 23532<br>(21116, 26665) | 11.6<br>(10.3, 13)   | -30.7<br>(-39.1, -18.8) |
| <b>Laos</b>                       | 348<br>(242, 477)       | 14.7<br>(10.6, 20.3) | 601<br>(401, 824)       | 13.1<br>(9, 17.9)    | -11.2<br>(-39.4, 27.6)  |
| <b>Malaysia</b>                   | 708<br>(593, 816)       | 7.2<br>(5.8, 8.3)    | 1346<br>(1070, 1700)    | 5.3<br>(4.2, 6.7)    | -26.4<br>(-41.1, -10.9) |
| <b>Maldives</b>                   | 4<br>(2, 6)             | 4.4<br>(2.9, 5.9)    | 6<br>(5, 8)             | 2.1<br>(1.6, 2.6)    | -51.7<br>(-64.8, -20.3) |
| <b>Mauritius</b>                  | 97<br>(81, 112)         | 11.4<br>(9.6, 13.2)  | 82<br>(68, 97)          | 5<br>(4.2, 5.8)      | -56.5<br>(-61.3, -50.7) |
| <b>Myanmar</b>                    | 7085<br>(4998, 9296)    | 25.5<br>(18.1, 33.2) | 8821<br>(6929, 10992)   | 17.8<br>(14.2, 22.2) | -30.2<br>(-47.7, -1.1)  |
| <b>Philippines</b>                | 1554<br>(1323, 1834)    | 4.3<br>(3.6, 5)      | 4601<br>(3656, 5668)    | 6.1<br>(4.9, 7.5)    | 43.4<br>(20.8, 69.9)    |
| <b>Sri Lanka</b>                  | 1405<br>(1126, 1658)    | 11.6<br>(9.5, 13.6)  | 1448<br>(1103, 1868)    | 6<br>(4.6, 7.6)      | -48.3<br>(-58.6, -36.2) |
| <b>Seychelles</b>                 | 5<br>(4, 6)             | 9.2<br>(7.5, 11.3)   | 9<br>(8, 11)            | 8.4<br>(6.9, 10.1)   | -9.1<br>(-22.9, 7.9)    |
| <b>Thailand</b>                   | 3549<br>(2911, 4257)    | 8.5<br>(7, 10.2)     | 5899<br>(4556, 7207)    | 6.1<br>(4.7, 7.4)    | -28.6<br>(-40.9, -12.7) |
| <b>East Timor</b>                 | 34<br>(22, 48)          | 9.3<br>(5.6, 13.5)   | 86<br>(50, 124)         | 10.7<br>(6.3, 15.3)  | 15.1<br>(-17.2, 64.6)   |
| <b>Vietnam</b>                    | 4748<br>(3445, 6319)    | 11.5<br>(8.3, 15.3)  | 8597<br>(6684, 11167)   | 9.2<br>(7.2, 11.8)   | -20.4<br>(-45.1, 15.2)  |

|                                       |                         |                      |                         |                     |                         |
|---------------------------------------|-------------------------|----------------------|-------------------------|---------------------|-------------------------|
| <b>Oceania</b>                        | 447<br>(384, 523)       | 11.7<br>(10, 13.5)   | 761<br>(625, 937)       | 9.1<br>(7.7, 10.9)  | -22<br>(-36, -5.9)      |
| <b>American Samoa</b>                 | 2<br>(2, 2)             | 7.1<br>(5.5, 8.8)    | 2<br>(2, 3)             | 5.5<br>(4.8, 6.3)   | -21.7<br>(-38.6, -2.1)  |
| <b>Federated States of Micronesia</b> | 8<br>(6, 11)            | 13.8<br>(10.4, 21.1) | 6<br>(4, 8)             | 7.8<br>(5.4, 11)    | -43.1<br>(-58.9, -21.6) |
| <b>Fiji</b>                           | 17<br>(14, 21)          | 3.9<br>(3.1, 4.7)    | 26<br>(22, 31)          | 3.5<br>(3, 4.1)     | -9.5<br>(-28.6, 16.3)   |
| <b>Guam</b>                           | 9<br>(7, 11)            | 10.7<br>(8.5, 12.7)  | 15<br>(13, 17)          | 8.4<br>(7.3, 9.9)   | -21.2<br>(-36.2, 2.5)   |
| <b>Kiribati</b>                       | 6<br>(4, 8)             | 13.2<br>(9.4, 18.6)  | 8<br>(5, 11)            | 10.1<br>(6.6, 15.3) | -23<br>(-39, -3.1)      |
| <b>Marshall Islands</b>               | 3<br>(2, 4)             | 14<br>(10.1, 17.4)   | 4<br>(2, 5)             | 10.4<br>(6.7, 13.8) | -26.2<br>(-41.8, -8.5)  |
| <b>Northern Mariana Islands</b>       | 2<br>(2, 3)             | 10.3<br>(8.5, 12.8)  | 4<br>(3, 4)             | 7.7<br>(6.7, 8.9)   | -24.9<br>(-41.8, -6.6)  |
| <b>Papua New Guinea</b>               | 318<br>(264, 387)       | 12.7<br>(10.6, 15.3) | 578<br>(446, 745)       | 9.6<br>(7.6, 12.2)  | -23.9<br>(-40.7, -4.3)  |
| <b>Samoa</b>                          | 9<br>(7, 14)            | 9.6<br>(6.9, 15.3)   | 10<br>(7, 13)           | 6.9<br>(5.1, 9.6)   | -28.2<br>(-42.8, -10.9) |
| <b>Solomon Islands</b>                | 20<br>(15, 24)          | 11.3<br>(8.9, 13.9)  | 32<br>(26, 39)          | 8.3<br>(6.8, 9.8)   | -26.7<br>(-42, -8.1)    |
| <b>Tonga</b>                          | 7<br>(6, 8)             | 12.3<br>(10.4, 14.3) | 8<br>(6, 10)            | 9.9<br>(8, 11.9)    | -19.5<br>(-34.8, 0)     |
| <b>Vanuatu</b>                        | 17<br>(8, 28)           | 19.8<br>(9.4, 33.4)  | 27<br>(13, 48)          | 14.2<br>(6.8, 26.4) | -28.3<br>(-45.9, -3.3)  |
| <b>North Africa and Middle East</b>   | 20545<br>(14326, 25080) | 12.9<br>(8.3, 16.1)  | 29522<br>(22515, 37062) | 7.4<br>(5.5, 9.4)   | -42.5<br>(-55.9, -29.2) |
| <b>Afghanistan</b>                    | 524<br>(231, 869)       | 7.9<br>(3.5, 13.3)   | 729<br>(434, 1061)      | 6.6<br>(4.1, 10.2)  | -16.4<br>(-34.8, 46)    |
| <b>Algeria</b>                        | 566<br>(365, 884)       | 4.7<br>(2.9, 7.5)    | 933<br>(656, 1285)      | 3<br>(2, 4.1)       | -37.4<br>(-51.9, -18)   |

|                     |                        |                      |                         |                      |                         |
|---------------------|------------------------|----------------------|-------------------------|----------------------|-------------------------|
| <b>Bahrain</b>      | 14<br>(10, 17)         | 7.6<br>(5.6, 9.8)    | 26<br>(20, 34)          | 2.9<br>(2.2, 3.7)    | -61.6<br>(-68.7, -53.5) |
| <b>Egypt</b>        | 13378<br>(8392, 15975) | 62.2<br>(34.1, 76.5) | 18553<br>(12843, 25048) | 43.1<br>(26.6, 58.7) | -30.8<br>(-49.1, -11.9) |
| <b>Iran</b>         | 810<br>(678, 948)      | 3.2<br>(2.6, 3.8)    | 1549<br>(1382, 1726)    | 2.3<br>(2.1, 2.6)    | -26.2<br>(-39.1, -12)   |
| <b>Iraq</b>         | 323<br>(238, 436)      | 3.9<br>(2.9, 5.3)    | 368<br>(293, 452)       | 1.5<br>(1.2, 1.9)    | -61.5<br>(-68.7, -51.8) |
| <b>Jordan</b>       | 66<br>(49, 90)         | 4.5<br>(3.3, 6.1)    | 134<br>(101, 171)       | 2.5<br>(1.8, 3.2)    | -45<br>(-58.2, -24.6)   |
| <b>Kuwait</b>       | 19<br>(15, 23)         | 2.4<br>(1.9, 2.9)    | 48<br>(37, 62)          | 1.8<br>(1.4, 2.3)    | -24.2<br>(-39.1, -10.8) |
| <b>Lebanon</b>      | 111<br>(82, 146)       | 5.2<br>(3.9, 6.8)    | 179<br>(120, 240)       | 3.1<br>(2, 4.1)      | -41.6<br>(-64.7, -22.8) |
| <b>Libya</b>        | 105<br>(71, 154)       | 5.5<br>(3.6, 8.3)    | 170<br>(108, 236)       | 3.9<br>(2.4, 5.3)    | -30.2<br>(-51.3, 7)     |
| <b>Morocco</b>      | 725<br>(493, 1062)     | 5.1<br>(3.3, 7.8)    | 1045<br>(771, 1370)     | 3.5<br>(2.6, 4.6)    | -31.4<br>(-51.5, -1.5)  |
| <b>Palestine</b>    | 40<br>(27, 55)         | 4.4<br>(3, 6.1)      | 69<br>(54, 87)          | 2.9<br>(2.2, 3.8)    | -32.9<br>(-47.8, -7.2)  |
| <b>Oman</b>         | 32<br>(22, 44)         | 4.4<br>(3, 6.1)      | 54<br>(36, 73)          | 2.6<br>(1.8, 3.6)    | -40<br>(-57.7, -18.9)   |
| <b>Qatar</b>        | 9<br>(7, 12)           | 8.2<br>(5.9, 10.8)   | 35<br>(24, 47)          | 4.2<br>(3, 5.6)      | -48.9<br>(-60.8, -32.9) |
| <b>Saudi Arabia</b> | 418<br>(179, 602)      | 7.1<br>(2.7, 10.5)   | 549<br>(345, 739)       | 4.2<br>(2.3, 5.7)    | -41.8<br>(-60.1, -6.3)  |
| <b>Sudan</b>        | 792<br>(397, 1383)     | 8.9<br>(4, 16.1)     | 1037<br>(588, 1659)     | 6<br>(3.1, 10.1)     | -32.9<br>(-52.5, 1.7)   |
| <b>Syria</b>        | 287<br>(226, 363)      | 5.3<br>(4.1, 6.7)    | 484<br>(356, 625)       | 4<br>(2.9, 5.2)      | -24.2<br>(-41.1, -3.4)  |
| <b>Tunisia</b>      | 76<br>(47, 115)        | 1.7<br>(1, 2.6)      | 120<br>(81, 172)        | 1.1<br>(0.7, 1.5)    | -36.4<br>(-56.6, -9.5)  |

|                                    |                         |                     |                          |                    |                         |
|------------------------------------|-------------------------|---------------------|--------------------------|--------------------|-------------------------|
| <b>Turkey</b>                      | 1864<br>(1307, 2496)    | 5.2<br>(3.7, 7)     | 2746<br>(2323, 3208)     | 3.2<br>(2.7, 3.7)  | -39.3<br>(-58.3, -13.1) |
| <b>United Arab Emirates</b>        | 27<br>(11, 42)          | 5.4<br>(2, 8.5)     | 131<br>(62, 196)         | 3.4<br>(1.5, 5.1)  | -36.9<br>(-58.2, -2)    |
| <b>Yemen</b>                       | 343<br>(164, 611)       | 7<br>(3.2, 12.7)    | 535<br>(351, 797)        | 4.3<br>(2.7, 6.8)  | -38.1<br>(-60.2, 8.3)   |
| <b>South Asia</b>                  | 51706<br>(45598, 60610) | 7.5<br>(6.7, 8.7)   | 96367<br>(84335, 126218) | 6.8<br>(5.9, 8.9)  | -10.5<br>(-20.9, 7.2)   |
| <b>Bangladesh</b>                  | 6642<br>(4710, 8124)    | 10.7<br>(7.6, 13.2) | 7440<br>(6103, 9425)     | 6<br>(4.9, 7.6)    | -44.1<br>(-56.3, -14.9) |
| <b>Bhutan</b>                      | 33<br>(26, 43)          | 11<br>(8.5, 14.3)   | 45<br>(31, 63)           | 6.6<br>(4.5, 9.2)  | -39.9<br>(-57.7, -14.5) |
| <b>India</b>                       | 37317<br>(31791, 48066) | 6.7<br>(5.8, 8.4)   | 75603<br>(65343, 104321) | 6.5<br>(5.7, 9.1)  | -2.5<br>(-15.2, 13.9)   |
| <b>Nepal</b>                       | 822<br>(591, 1104)      | 7.2<br>(5.3, 9.7)   | 1281<br>(890, 1735)      | 5.7<br>(4, 7.7)    | -20.4<br>(-42.2, 5.6)   |
| <b>Pakistan</b>                    | 6892<br>(4424, 9262)    | 11<br>(6.9, 14.9)   | 11998<br>(8750, 15707)   | 9.8<br>(6.9, 12.7) | -11<br>(-29.8, 17.4)    |
| <b>Southern sub-Saharan Africa</b> | 1510<br>(1187, 1744)    | 4.9<br>(3.7, 5.7)   | 1486<br>(1191, 1796)     | 2.5<br>(2, 3)      | -48<br>(-60.5, -30.5)   |
| <b>Botswana</b>                    | 31<br>(20, 45)          | 4.8<br>(3.2, 6.9)   | 41<br>(29, 58)           | 2.8<br>(2.1, 3.9)  | -41.7<br>(-56.6, -22.5) |
| <b>eSwatini</b>                    | 27<br>(20, 37)          | 7.9<br>(5.8, 11)    | 29<br>(21, 40)           | 4.5<br>(3.4, 6.3)  | -42.6<br>(-59.9, -18.5) |
| <b>Lesotho</b>                     | 50<br>(21, 78)          | 4.7<br>(2, 7.3)     | 48<br>(22, 75)           | 3.7<br>(1.7, 5.7)  | -21.7<br>(-47.6, 25.7)  |
| <b>Namibia</b>                     | 23<br>(11, 35)          | 3.1<br>(1.5, 4.7)   | 52<br>(31, 81)           | 3.4<br>(2, 5.3)    | 10.6<br>(-28.2, 64.1)   |
| <b>South Africa</b>                | 1059<br>(814, 1257)     | 4.4<br>(3.3, 5.3)   | 969<br>(853, 1112)       | 2.1<br>(1.8, 2.4)  | -52.6<br>(-59.5, -37.1) |
| <b>Zimbabwe</b>                    | 321<br>(255, 390)       | 7.3<br>(5.9, 8.9)   | 347<br>(106, 620)        | 4.8<br>(1.5, 8.5)  | -34.5<br>(-81.1, 17.6)  |



|                                   |                         |                      |                         |                      |                         |
|-----------------------------------|-------------------------|----------------------|-------------------------|----------------------|-------------------------|
| <b>Western sub-Saharan Africa</b> | 26585<br>(16526, 37775) | 27.9<br>(17.1, 39.7) | 35529<br>(23817, 50557) | 17.9<br>(12, 25.4)   | -35.8<br>(-52.1, -14.8) |
| <b>Benin</b>                      | 474<br>(326, 698)       | 22<br>(14.9, 32.6)   | 634<br>(446, 884)       | 12.3<br>(8.6, 17.1)  | -43.9<br>(-70.8, -14.3) |
| <b>Burkina Faso</b>               | 1011<br>(803, 1191)     | 23<br>(18.5, 27.2)   | 1034<br>(77, 1886)      | 11.2<br>(0.8, 20.4)  | -51.4<br>(-96.8, -6.3)  |
| <b>Cameroon</b>                   | 1254<br>(970, 1515)     | 25.9<br>(19.9, 31.3) | 2012<br>(911, 3017)     | 15.6<br>(6.9, 23.5)  | -39.5<br>(-67.8, -13)   |
| <b>Cape Verde</b>                 | 20<br>(16, 25)          | 8.9<br>(6.9, 11.1)   | 43<br>(37, 50)          | 9.1<br>(7.8, 10.7)   | 2<br>(-22.8, 35.1)      |
| <b>Chad</b>                       | 571<br>(360, 814)       | 18.9<br>(11.7, 26.9) | 1118<br>(830, 1451)     | 18.2<br>(13.4, 23.9) | -3.5<br>(-27.7, 40.6)   |
| <b>Côte d'Ivoire</b>              | 1052<br>(785, 1420)     | 22.1<br>(16.2, 30.3) | 1810<br>(1359, 2366)    | 15.2<br>(11.5, 19.9) | -31.2<br>(-54.6, -7.7)  |
| <b>The Gambia</b>                 | 71<br>(42, 106)         | 17.8<br>(10.3, 26.1) | 147<br>(104, 191)       | 14.4<br>(10.4, 18.4) | -18.9<br>(-44.5, 24)    |
| <b>Ghana</b>                      | 1407<br>(1131, 1745)    | 20.2<br>(16, 25)     | 1939<br>(635, 3447)     | 11.6<br>(3.7, 20.5)  | -42.3<br>(-83.6, 0.9)   |
| <b>Guinea</b>                     | 738<br>(448, 1245)      | 21.4<br>(12.7, 36.4) | 911<br>(586, 1421)      | 16<br>(10.1, 25)     | -25.3<br>(-44.7, 13.1)  |
| <b>Guinea-Bissau</b>              | 114<br>(75, 156)        | 25.7<br>(16.9, 34.1) | 156<br>(117, 214)       | 19.3<br>(14.7, 25.9) | -25.2<br>(-44, 7.8)     |
| <b>Liberia</b>                    | 339<br>(239, 466)       | 29.2<br>(20.1, 41)   | 389<br>(286, 515)       | 18.2<br>(13.2, 24.3) | -37.7<br>(-53.3, -19.8) |
| <b>Mali</b>                       | 997<br>(636, 1547)      | 23.9<br>(14.8, 38)   | 923<br>(336, 1635)      | 10.4<br>(3.6, 18.2)  | -56.6<br>(-89, -21.8)   |
| <b>Mauritania</b>                 | 201<br>(150, 278)       | 18.7<br>(13.9, 25.7) | 221<br>(154, 300)       | 10.6<br>(7.5, 14.4)  | -43.1<br>(-56.5, -27.3) |
| <b>Niger</b>                      | 562<br>(397, 884)       | 17.7<br>(12.4, 27.8) | 809<br>(207, 1451)      | 10<br>(2.5, 17.6)    | -43.3<br>(-82, -12.7)   |
| <b>Nigeria</b>                    | 16271<br>(7624, 25806)  | 33.8<br>(15.7, 53.9) | 21601<br>(9263, 37489)  | 23.4<br>(10.1, 40.3) | -30.7<br>(-50.6, -0.3)  |

|                                   |                        |                      |                         |                      |                         |
|-----------------------------------|------------------------|----------------------|-------------------------|----------------------|-------------------------|
| <b>São Tomé and Príncipe</b>      | 27<br>(17, 34)         | 37.9<br>(24.7, 48.2) | 40<br>(30, 56)          | 35.2<br>(26.5, 48.8) | -7.3<br>(-39.2, 37.9)   |
| <b>Senegal</b>                    | 544<br>(340, 765)      | 15.7<br>(9.7, 22)    | 776<br>(308, 1184)      | 10.1<br>(3.9, 15.3)  | -35.6<br>(-61.6, -15.5) |
| <b>Sierra Leone</b>               | 611<br>(409, 917)      | 29.6<br>(19.6, 44.8) | 556<br>(219, 817)       | 14.5<br>(5.6, 21.7)  | -50.8<br>(-87.5, -5.8)  |
| <b>Togo</b>                       | 320<br>(238, 428)      | 22.6<br>(16.7, 30.4) | 409<br>(133, 631)       | 10.5<br>(3.3, 16.2)  | -53.4<br>(-88.2, -16.9) |
| <b>Eastern sub-Saharan Africa</b> | 10396<br>(8243, 13106) | 13.1<br>(10.6, 16.1) | 14977<br>(11326, 18744) | 8.9<br>(6.6, 11.3)   | -31.7<br>(-49.5, -8.2)  |
| <b>Burundi</b>                    | 425<br>(264, 645)      | 17.8<br>(11.4, 26.8) | 395<br>(115, 690)       | 8.7<br>(2.4, 15.1)   | -50.8<br>(-86.6, -17.3) |
| <b>Comoros</b>                    | 12<br>(2, 23)          | 5.8<br>(0.7, 10.7)   | 22<br>(4, 37)           | 4.7<br>(0.9, 8.1)    | -18.9<br>(-37.3, 28.8)  |
| <b>Djibouti</b>                   | 12<br>(8, 18)          | 7.2<br>(4.6, 10.4)   | 37<br>(23, 56)          | 6.2<br>(3.8, 9.5)    | -13.8<br>(-40.6, 23.3)  |
| <b>Eritrea</b>                    | 145<br>(84, 238)       | 13.3<br>(8.4, 21.5)  | 277<br>(196, 381)       | 10.5<br>(7.6, 14.1)  | -20.9<br>(-45.4, 24.7)  |
| <b>Ethiopia</b>                   | 3110<br>(1919, 4916)   | 15.2<br>(9.7, 22.9)  | 4708<br>(3938, 5651)    | 11.2<br>(9.5, 13.5)  | -26<br>(-51.4, 23.6)    |
| <b>Kenya</b>                      | 1613<br>(1003, 2347)   | 18.1<br>(11.4, 26.2) | 2884<br>(1883, 4083)    | 12.7<br>(8.5, 18.2)  | -29.8<br>(-57.7, -7)    |
| <b>Madagascar</b>                 | 557<br>(365, 862)      | 9.9<br>(6.5, 15.4)   | 731<br>(503, 988)       | 6.4<br>(4.4, 8.6)    | -35.5<br>(-64.9, 1.4)   |
| <b>Malawi</b>                     | 656<br>(357, 916)      | 15.4<br>(9.3, 21.2)  | 669<br>(130, 1129)      | 8.3<br>(1.6, 14)     | -46.3<br>(-90.2, 12.5)  |
| <b>Mozambique</b>                 | 558<br>(347, 790)      | 8.7<br>(5.4, 12.2)   | 615<br>(94, 1079)       | 5.1<br>(0.8, 8.8)    | -41.4<br>(-91.2, 22.9)  |
| <b>Rwanda</b>                     | 431<br>(318, 561)      | 13.8<br>(10.3, 17.8) | 377<br>(231, 549)       | 6.2<br>(3.8, 8.9)    | -55.1<br>(-73.4, -33)   |
| <b>Somalia</b>                    | 251<br>(113, 451)      | 9.1<br>(4.8, 15.5)   | 661<br>(392, 1030)      | 9.8<br>(5.8, 15.2)   | 8.4<br>(-26, 74.4)      |

|                                   |                      |                      |                      |                     |                         |
|-----------------------------------|----------------------|----------------------|----------------------|---------------------|-------------------------|
| <b>South Sudan</b>                | 231<br>(120, 392)    | 9.3<br>(5.3, 15.1)   | 382<br>(244, 576)    | 9.5<br>(6.2, 14.2)  | 3<br>(-29.2, 58)        |
| <b>Tanzania</b>                   | 1138<br>(763, 1562)  | 10<br>(7.1, 13.6)    | 1409<br>(539, 2294)  | 5.6<br>(2.1, 9.2)   | -43.9<br>(-78.8, -10)   |
| <b>Uganda</b>                     | 668<br>(407, 979)    | 9.6<br>(5.7, 13.9)   | 988<br>(377, 1579)   | 6.6<br>(2.4, 10.4)  | -31<br>(-62.8, 0.7)     |
| <b>Zambia</b>                     | 582<br>(417, 753)    | 18.7<br>(13.8, 24.3) | 813<br>(618, 1047)   | 11.6<br>(8.8, 15)   | -38.2<br>(-52.8, -20.3) |
| <b>Central sub-Saharan Africa</b> | 3503<br>(2528, 4837) | 13.7<br>(9.7, 19.1)  | 6335<br>(4743, 8277) | 10.7<br>(7.9, 14.2) | -22.1<br>(-36.5, -1.9)  |
| <b>Angola</b>                     | 722<br>(393, 1175)   | 16.1<br>(8.5, 26.9)  | 1585<br>(1155, 2223) | 12.8<br>(9.2, 18.6) | -20.5<br>(-44.7, 31)    |
| <b>Central African Republic</b>   | 179<br>(100, 268)    | 12.8<br>(7.1, 18.6)  | 226<br>(95, 379)     | 8.8<br>(3.6, 14.3)  | -31.4<br>(-53.7, -8.7)  |
| <b>Congo</b>                      | 186<br>(125, 286)    | 15.3<br>(10.2, 23.3) | 307<br>(194, 450)    | 11<br>(6.8, 16.4)   | -28.1<br>(-46.1, -0.9)  |
| <b>DR Congo</b>                   | 2286<br>(1619, 3218) | 12.9<br>(9.1, 18.3)  | 4055<br>(2849, 5485) | 10.1<br>(7.1, 14)   | -21.6<br>(-39.8, 1.2)   |
| <b>Equatorial Guinea</b>          | 25<br>(8, 45)        | 11.3<br>(3.4, 19.4)  | 44<br>(24, 70)       | 7.7<br>(4.1, 12.5)  | -31.6<br>(-56.6, 44)    |
| <b>Gabon</b>                      | 104<br>(69, 149)     | 17.3<br>(11.4, 25.4) | 118<br>(78, 178)     | 10.5<br>(6.8, 16.1) | -39.4<br>(-52.7, -22.5) |

**Appendix Table 12: Number of deaths and age-standardised death rates of cirrhosis due to hepatitis C per 100 000 in 1990 and 2017 for both sexes and the percentage change by location**

|                                  | 1990                       |                   | 2017                       |                   | Percentage change in age-standardised rates between 1990 and 2017 |
|----------------------------------|----------------------------|-------------------|----------------------------|-------------------|-------------------------------------------------------------------|
|                                  | Counts (95% UI)            | Rate (95% UI)     | Counts (95% UI)            | Rate (95% UI)     |                                                                   |
| <b>Global</b>                    | 225266<br>(201660, 248588) | 5.3<br>(4.8, 5.9) | 342243<br>(312603, 381099) | 4.2<br>(3.9, 4.7) | -20.5<br>(-26.7, -11.5)                                           |
| <b>High-income North America</b> | 13546<br>(12874, 14136)    | 4.1<br>(3.9, 4.2) | 23355<br>(22041, 24592)    | 4.2<br>(3.9, 4.4) | 2.8<br>(-1.3, 7.6)                                                |
| <b>Canada</b>                    | 937<br>(871, 1005)         | 2.9<br>(2.7, 3.1) | 1501<br>(1359, 1646)       | 2.4<br>(2.2, 2.6) | -17.7<br>(-24.3, -10.3)                                           |
| <b>Greenland</b>                 | 2<br>(1, 2)                | 3.2<br>(2.7, 3.9) | 2<br>(2, 3)                | 3.1<br>(2.3, 3.6) | -2.3<br>(-31.6, 25.9)                                             |
| <b>USA</b>                       | 12607<br>(11958, 13148)    | 4.2<br>(4, 4.4)   | 21851<br>(20620, 23005)    | 4.4<br>(4.1, 4.6) | 4.6<br>(0.3, 9.9)                                                 |
| <b>Australasia</b>               | 545<br>(505, 586)          | 2.4<br>(2.2, 2.5) | 898<br>(792, 1001)         | 2<br>(1.7, 2.2)   | -16.4<br>(-25.5, -5.6)                                            |
| <b>Australia</b>                 | 476<br>(437, 516)          | 2.5<br>(2.3, 2.7) | 793<br>(694, 894)          | 2.1<br>(1.8, 2.4) | -15.8<br>(-25.9, -3.5)                                            |
| <b>New Zealand</b>               | 69<br>(64, 74)             | 1.8<br>(1.7, 1.9) | 104<br>(95, 115)           | 1.4<br>(1.3, 1.5) | -21.5<br>(-28.2, -14.4)                                           |
| <b>High-income Asia Pacific</b>  | 13673<br>(13109, 14189)    | 6.8<br>(6.5, 7)   | 14491<br>(13379, 15403)    | 3.4<br>(3.1, 3.6) | -50.2<br>(-53.8, -47.6)                                           |
| <b>Brunei</b>                    | 3<br>(2, 5)                | 2.6<br>(1.5, 3.9) | 6<br>(4, 9)                | 1.6<br>(1, 2.5)   | -38.3<br>(-50.7, -11.9)                                           |
| <b>Japan</b>                     | 12389<br>(11925, 12793)    | 7.3<br>(7, 7.5)   | 13630<br>(12602, 14484)    | 4.2<br>(3.8, 4.4) | -42.9<br>(-46.9, -40)                                             |
| <b>Singapore</b>                 | 18<br>(15, 22)             | 0.7<br>(0.6, 0.9) | 25<br>(20, 31)             | 0.3<br>(0.3, 0.4) | -51.6<br>(-57.6, -45.1)                                           |
| <b>South Korea</b>               | 1263<br>(1102, 1445)       | 3.6<br>(3.2, 4.1) | 831<br>(684, 1000)         | 1<br>(0.8, 1.2)   | -72.9<br>(-77, -68.7)                                             |
| <b>Western Europe</b>            | 18996<br>(16045, 22487)    | 3.5<br>(2.9, 4.1) | 15873<br>(13078, 19098)    | 1.9<br>(1.6, 2.3) | -44.4<br>(-48.2, -40.3)                                           |

|                    |                      |                    |                      |                   |                         |
|--------------------|----------------------|--------------------|----------------------|-------------------|-------------------------|
| <b>Andorra</b>     | 1<br>(1, 2)          | 1.9<br>(1.2, 2.8)  | 2<br>(1, 3)          | 1.4<br>(0.9, 2.1) | -26.7<br>(-45.5, -1.6)  |
| <b>Austria</b>     | 410<br>(291, 556)    | 3.9<br>(2.7, 5.3)  | 331<br>(234, 448)    | 2.1<br>(1.5, 2.9) | -45.6<br>(-51.7, -39.2) |
| <b>Belgium</b>     | 252<br>(196, 313)    | 1.8<br>(1.4, 2.2)  | 293<br>(226, 371)    | 1.4<br>(1.1, 1.8) | -18<br>(-27.4, -8.9)    |
| <b>Cyprus</b>      | 16<br>(11, 24)       | 2<br>(1.3, 2.9)    | 22<br>(16, 30)       | 1.2<br>(0.9, 1.6) | -39.3<br>(-54.5, -20.8) |
| <b>Denmark</b>     | 133<br>(94, 182)     | 1.9<br>(1.4, 2.7)  | 163<br>(112, 224)    | 1.7<br>(1.2, 2.3) | -14.6<br>(-27.4, 0.7)   |
| <b>Finland</b>     | 109<br>(78, 150)     | 1.7<br>(1.2, 2.3)  | 217<br>(149, 301)    | 2.4<br>(1.6, 3.3) | 41.9<br>(19.3, 62.9)    |
| <b>France</b>      | 2245<br>(1596, 3023) | 3<br>(2.1, 4)      | 1861<br>(1326, 2536) | 1.6<br>(1.1, 2.2) | -45.8<br>(-52.9, -39.3) |
| <b>Germany</b>     | 3469<br>(2478, 4708) | 3<br>(2.1, 4.1)    | 3358<br>(2335, 4586) | 2.1<br>(1.5, 2.8) | -29.5<br>(-39.5, -18.4) |
| <b>Greece</b>      | 259<br>(184, 351)    | 1.7<br>(1.2, 2.3)  | 218<br>(153, 297)    | 1<br>(0.7, 1.4)   | -41.1<br>(-48, -32.9)   |
| <b>Iceland</b>     | 1<br>(1, 1)          | 0.4<br>(0.3, 0.5)  | 1<br>(1, 2)          | 0.3<br>(0.2, 0.4) | -20.4<br>(-30.1, -9.4)  |
| <b>Ireland</b>     | 35<br>(25, 46)       | 0.9<br>(0.6, 1.2)  | 70<br>(50, 96)       | 1<br>(0.7, 1.4)   | 15.8<br>(0.8, 31.5)     |
| <b>Israel</b>      | 78<br>(56, 105)      | 1.6<br>(1.2, 2.2)  | 140<br>(100, 189)    | 1.2<br>(0.9, 1.7) | -23.1<br>(-30.9, -14.4) |
| <b>Italy</b>       | 8224<br>(7605, 8861) | 9.4<br>(8.8, 10.1) | 5668<br>(5045, 6336) | 4.1<br>(3.6, 4.6) | -56.7<br>(-61.1, -51.9) |
| <b>Luxembourg</b>  | 17<br>(12, 24)       | 3.2<br>(2.3, 4.5)  | 17<br>(12, 23)       | 1.9<br>(1.3, 2.6) | -42.7<br>(-52.8, -32.4) |
| <b>Malta</b>       | 7<br>(5, 9)          | 1.5<br>(1.1, 2)    | 8<br>(6, 11)         | 1<br>(0.7, 1.4)   | -33.1<br>(-40.3, -23.3) |
| <b>Netherlands</b> | 242<br>(176, 322)    | 1.2<br>(0.9, 1.7)  | 288<br>(205, 386)    | 0.9<br>(0.6, 1.2) | -28.7<br>(-36.2, -20.8) |

|                               |                      |                      |                         |                    |                         |
|-------------------------------|----------------------|----------------------|-------------------------|--------------------|-------------------------|
| <b>Norway</b>                 | 63<br>(54, 71)       | 1<br>(0.9, 1.2)      | 66<br>(57, 77)          | 0.7<br>(0.6, 0.9)  | -29.1<br>(-36.8, -23)   |
| <b>Portugal</b>               | 625<br>(451, 848)    | 4.8<br>(3.5, 6.4)    | 393<br>(283, 538)       | 2<br>(1.4, 2.7)    | -59<br>(-64.2, -53.6)   |
| <b>Spain</b>                  | 2098<br>(1681, 2557) | 4<br>(3.2, 4.8)      | 1598<br>(1255, 1993)    | 1.8<br>(1.4, 2.2)  | -55.9<br>(-60.3, -51.2) |
| <b>Sweden</b>                 | 139<br>(121, 160)    | 1.1<br>(0.9, 1.2)    | 174<br>(150, 203)       | 0.9<br>(0.8, 1.1)  | -11.5<br>(-19.5, -3.4)  |
| <b>Switzerland</b>            | 143<br>(102, 194)    | 1.5<br>(1.1, 2)      | 166<br>(120, 223)       | 1<br>(0.8, 1.4)    | -28.9<br>(-38.8, -16.7) |
| <b>UK</b>                     | 413<br>(354, 487)    | 0.5<br>(0.4, 0.6)    | 803<br>(677, 956)       | 0.8<br>(0.7, 0.9)  | 49.4<br>(42, 60.1)      |
| <b>Southern Latin America</b> | 2754<br>(2405, 3125) | 5.8<br>(5.1, 6.6)    | 3765<br>(3223, 4347)    | 4.7<br>(4, 5.4)    | -19.6<br>(-27.4, -11.2) |
| <b>Argentina</b>              | 1488<br>(1303, 1702) | 4.6<br>(4, 5.2)      | 2126<br>(1764, 2535)    | 4.1<br>(3.4, 4.9)  | -10.2<br>(-22.7, 3.2)   |
| <b>Chile</b>                  | 1111<br>(954, 1273)  | 10.3<br>(8.9, 11.8)  | 1489<br>(1245, 1744)    | 6.4<br>(5.4, 7.5)  | -38<br>(-46.3, -28.7)   |
| <b>Uruguay</b>                | 155<br>(135, 178)    | 4<br>(3.5, 4.6)      | 150<br>(126, 178)       | 2.9<br>(2.4, 3.4)  | -28.2<br>(-37.5, -16.9) |
| <b>Eastern Europe</b>         | 7357<br>(6704, 8010) | 2.6<br>(2.4, 2.8)    | 19117<br>(17561, 20686) | 6.3<br>(5.8, 6.8)  | 140.3<br>(129.3, 152.7) |
| <b>Belarus</b>                | 197<br>(166, 232)    | 1.5<br>(1.3, 1.8)    | 588<br>(474, 705)       | 4<br>(3.3, 4.9)    | 166.7<br>(122, 207.6)   |
| <b>Estonia</b>                | 33<br>(28, 39)       | 1.6<br>(1.4, 1.9)    | 65<br>(53, 79)          | 3.2<br>(2.6, 3.9)  | 97.2<br>(61.1, 132.3)   |
| <b>Latvia</b>                 | 56<br>(48, 66)       | 1.6<br>(1.4, 1.9)    | 101<br>(83, 122)        | 3.3<br>(2.7, 3.9)  | 106.1<br>(75.3, 140.7)  |
| <b>Lithuania</b>              | 82<br>(71, 95)       | 1.8<br>(1.6, 2.1)    | 217<br>(182, 255)       | 5<br>(4.2, 5.8)    | 174<br>(143.8, 206.2)   |
| <b>Moldova</b>                | 768<br>(660, 892)    | 16.3<br>(14.1, 18.8) | 770<br>(648, 894)       | 13.8<br>(11.7, 16) | -15.2<br>(-23.3, -8.1)  |

|                               |                      |                   |                         |                   |                         |
|-------------------------------|----------------------|-------------------|-------------------------|-------------------|-------------------------|
| <b>Russia</b>                 | 4231<br>(3770, 4623) | 2.3<br>(2.1, 2.5) | 12552<br>(11616, 13476) | 6<br>(5.5, 6.4)   | 156.6<br>(140.9, 182.9) |
| <b>Ukraine</b>                | 1990<br>(1829, 2170) | 2.8<br>(2.6, 3.1) | 4823<br>(4282, 5393)    | 7.6<br>(6.7, 8.5) | 168.4<br>(139.7, 198.2) |
| <b>Central Europe</b>         | 5877<br>(5212, 6624) | 3.9<br>(3.5, 4.4) | 6329<br>(5556, 7181)    | 3.3<br>(2.9, 3.8) | -14.9<br>(-19.1, -10.7) |
| <b>Albania</b>                | 53<br>(44, 61)       | 2.4<br>(1.9, 2.8) | 69<br>(53, 93)          | 1.7<br>(1.3, 2.3) | -28.9<br>(-45.8, 4.2)   |
| <b>Bosnia and Herzegovina</b> | 167<br>(145, 197)    | 3.7<br>(3.2, 4.2) | 133<br>(109, 188)       | 2.3<br>(1.9, 3.3) | -37.5<br>(-46.6, -18.8) |
| <b>Bulgaria</b>               | 359<br>(314, 409)    | 2.9<br>(2.5, 3.2) | 421<br>(360, 492)       | 3.4<br>(2.9, 4)   | 19.4<br>(6.5, 33.2)     |
| <b>Croatia</b>                | 346<br>(301, 395)    | 5.3<br>(4.6, 6)   | 222<br>(192, 256)       | 2.8<br>(2.5, 3.3) | -46.3<br>(-51.7, -40.6) |
| <b>Czech Republic</b>         | 418<br>(368, 473)    | 3.2<br>(2.8, 3.6) | 433<br>(373, 502)       | 2.4<br>(2.1, 2.8) | -23.2<br>(-32.2, -13.6) |
| <b>Hungary</b>                | 1136<br>(997, 1289)  | 8.2<br>(7.2, 9.4) | 628<br>(537, 721)       | 3.8<br>(3.2, 4.3) | -54.1<br>(-58.9, -49.2) |
| <b>Montenegro</b>             | 8<br>(6, 10)         | 1.2<br>(1, 1.5)   | 11<br>(8, 13)           | 1.1<br>(0.9, 1.4) | -6.4<br>(-25.1, 14.3)   |
| <b>North Macedonia</b>        | 32<br>(28, 39)       | 1.6<br>(1.4, 1.9) | 53<br>(42, 63)          | 1.6<br>(1.3, 1.9) | -2.7<br>(-21, 14.2)     |
| <b>Poland</b>                 | 939<br>(826, 1071)   | 2.1<br>(1.8, 2.4) | 1589<br>(1378, 1839)    | 2.6<br>(2.3, 3.1) | 25.6<br>(11.2, 41.3)    |
| <b>Romania</b>                | 1613<br>(1415, 1833) | 5.6<br>(4.9, 6.4) | 2066<br>(1764, 2392)    | 6.2<br>(5.4, 7.2) | 10.7<br>(0.5, 21.2)     |
| <b>Serbia</b>                 | 332<br>(255, 408)    | 2.7<br>(2.1, 3.3) | 282<br>(238, 333)       | 1.9<br>(1.6, 2.3) | -29<br>(-42, -10.1)     |
| <b>Slovakia</b>               | 318<br>(267, 391)    | 5.4<br>(4.5, 6.7) | 310<br>(247, 366)       | 3.7<br>(2.9, 4.3) | -32.3<br>(-51.5, -16.8) |
| <b>Slovenia</b>               | 155<br>(135, 177)    | 6.2<br>(5.4, 7)   | 112<br>(95, 131)        | 3<br>(2.5, 3.5)   | -51.6<br>(-57.3, -46)   |

|                              |                        |                      |                         |                      |                         |
|------------------------------|------------------------|----------------------|-------------------------|----------------------|-------------------------|
| <b>Central Asia</b>          | 2982<br>(2637, 3402)   | 6<br>(5.3, 6.9)      | 7419<br>(6439, 8525)    | 9.4<br>(8.1, 10.7)   | 55.3<br>(42.5, 66.4)    |
| <b>Armenia</b>               | 99<br>(86, 115)        | 3.6<br>(3.1, 4.1)    | 277<br>(236, 318)       | 6.8<br>(5.9, 7.8)    | 92.2<br>(72.6, 111.2)   |
| <b>Azerbaijan</b>            | 331<br>(284, 381)      | 6.4<br>(5.4, 7.3)    | 759<br>(595, 956)       | 8.7<br>(6.7, 11.2)   | 37<br>(14.8, 69.2)      |
| <b>Georgia</b>               | 347<br>(299, 400)      | 5.5<br>(4.8, 6.3)    | 334<br>(282, 395)       | 6.2<br>(5.2, 7.3)    | 12.1<br>(-0.4, 27.5)    |
| <b>Kazakhstan</b>            | 496<br>(430, 573)      | 3.7<br>(3.2, 4.3)    | 1629<br>(1278, 1961)    | 9.2<br>(7.3, 11)     | 145.6<br>(100.1, 183.1) |
| <b>Kyrgyzstan</b>            | 249<br>(218, 284)      | 7.9<br>(7, 9)        | 542<br>(449, 634)       | 10.7<br>(9, 12.5)    | 35.3<br>(17.9, 49.8)    |
| <b>Mongolia</b>              | 163<br>(138, 196)      | 14.9<br>(12.7, 17.6) | 341<br>(283, 407)       | 15.4<br>(12.2, 18.5) | 3.4<br>(-20.2, 21.4)    |
| <b>Tajikistan</b>            | 169<br>(145, 215)      | 5.6<br>(4.8, 7.2)    | 360<br>(304, 427)       | 6<br>(5.1, 7.4)      | 8<br>(-4.4, 22.1)       |
| <b>Turkmenistan</b>          | 191<br>(167, 216)      | 9.1<br>(8, 10.3)     | 567<br>(478, 660)       | 12.5<br>(10.7, 14.4) | 37.8<br>(22.7, 54.5)    |
| <b>Uzbekistan</b>            | 936<br>(814, 1071)     | 7.6<br>(6.6, 8.7)    | 2609<br>(2185, 3113)    | 10.4<br>(8.8, 12.3)  | 37<br>(20.8, 55.9)      |
| <b>Central Latin America</b> | 10243<br>(9767, 10718) | 10.7<br>(10.2, 11.2) | 18383<br>(17306, 19616) | 7.7<br>(7.2, 8.2)    | -27.8<br>(-31.5, -23.4) |
| <b>Colombia</b>              | 541<br>(498, 585)      | 2.9<br>(2.7, 3.2)    | 1080<br>(930, 1250)     | 2<br>(1.7, 2.3)      | -31.8<br>(-40, -21.6)   |
| <b>Costa Rica</b>            | 89<br>(83, 96)         | 4.8<br>(4.4, 5.1)    | 238<br>(210, 272)       | 4.8<br>(4.2, 5.5)    | 0.3<br>(-10.4, 14)      |
| <b>El Salvador</b>           | 280<br>(238, 305)      | 8.6<br>(7.3, 9.4)    | 447<br>(362, 586)       | 7.8<br>(6.3, 10.2)   | -8.7<br>(-27.1, 27.9)   |
| <b>Guatemala</b>             | 661<br>(608, 716)      | 14.8<br>(13.5, 16)   | 1536<br>(1346, 1735)    | 13<br>(11.4, 14.6)   | -12.3<br>(-23, -0.2)    |
| <b>Honduras</b>              | 300<br>(246, 420)      | 12.5<br>(10.4, 16.9) | 770<br>(574, 1067)      | 12.1<br>(9, 16.9)    | -3<br>(-24.7, 22.9)     |



|                             |                      |                      |                         |                      |                         |
|-----------------------------|----------------------|----------------------|-------------------------|----------------------|-------------------------|
| <b>Mexico</b>               | 7576<br>(7240, 7908) | 15.3<br>(14.6, 15.9) | 12720<br>(12004, 13533) | 10.7<br>(10.1, 11.4) | -29.6<br>(-32.9, -25.4) |
| <b>Nicaragua</b>            | 133<br>(117, 148)    | 7.3<br>(6.5, 8.2)    | 348<br>(250, 411)       | 7.2<br>(5.2, 8.4)    | -2.4<br>(-25.2, 13.9)   |
| <b>Panama</b>               | 61<br>(56, 67)       | 4<br>(3.7, 4.4)      | 138<br>(124, 154)       | 3.5<br>(3.1, 3.9)    | -13.8<br>(-22.3, -3.9)  |
| <b>Venezuela</b>            | 603<br>(556, 648)    | 5.6<br>(5.2, 6.1)    | 1107<br>(924, 1335)     | 3.8<br>(3.2, 4.6)    | -32.6<br>(-43.7, -19.6) |
| <b>Andean Latin America</b> | 782<br>(677, 903)    | 3.5<br>(3, 4.1)      | 1541<br>(1321, 1803)    | 2.8<br>(2.4, 3.3)    | -19.3<br>(-29.8, -8.8)  |
| <b>Bolivia</b>              | 148<br>(106, 204)    | 4.4<br>(3.2, 5.9)    | 312<br>(234, 414)       | 3.6<br>(2.7, 4.8)    | -16.8<br>(-35.4, 12.4)  |
| <b>Ecuador</b>              | 209<br>(185, 236)    | 3.6<br>(3.2, 4)      | 499<br>(431, 584)       | 3.4<br>(2.9, 4)      | -4.8<br>(-15.4, 9.5)    |
| <b>Peru</b>                 | 425<br>(365, 496)    | 3.3<br>(2.8, 3.8)    | 729<br>(588, 888)       | 2.4<br>(1.9, 2.9)    | -27.6<br>(-41.6, -11.4) |
| <b>Caribbean</b>            | 1217<br>(1046, 1425) | 4.5<br>(3.9, 5.3)    | 1656<br>(1393, 2009)    | 3.2<br>(2.7, 3.9)    | -28.1<br>(-35.4, -10.5) |
| <b>Antigua and Barbuda</b>  | 2<br>(2, 2)          | 3.8<br>(3.3, 4.4)    | 2<br>(2, 3)             | 2.4<br>(2.1, 2.8)    | -36.7<br>(-44.2, -27.8) |
| <b>The Bahamas</b>          | 8<br>(7, 10)         | 4.9<br>(4.2, 5.6)    | 12<br>(10, 14)          | 3.1<br>(2.6, 3.6)    | -37.1<br>(-45.3, -28.3) |
| <b>Barbados</b>             | 8<br>(7, 9)          | 2.8<br>(2.4, 3.2)    | 9<br>(7, 10)            | 1.8<br>(1.6, 2.2)    | -34.5<br>(-42.7, -25.2) |
| <b>Belize</b>               | 5<br>(4, 5)          | 4.8<br>(4, 5.5)      | 13<br>(11, 15)          | 4.5<br>(3.9, 5.3)    | -5.2<br>(-15.2, 6.4)    |
| <b>Bermuda</b>              | 2<br>(1, 2)          | 2.7<br>(2.3, 3.2)    | 1<br>(1, 2)             | 1.2<br>(1, 1.4)      | -57.2<br>(-63.5, -47.6) |
| <b>Cuba</b>                 | 254<br>(221, 290)    | 2.4<br>(2.1, 2.8)    | 430<br>(353, 517)       | 2.4<br>(1.9, 2.8)    | -2.2<br>(-14.9, 11.3)   |
| <b>Dominica</b>             | 2<br>(2, 2)          | 3<br>(2.7, 3.5)      | 2<br>(2, 3)             | 2.4<br>(2.1, 2.8)    | -20.9<br>(-29.9, -10.6) |

|                                             |                         |                    |                         |                   |                         |
|---------------------------------------------|-------------------------|--------------------|-------------------------|-------------------|-------------------------|
| <b>Dominican Republic</b>                   | 295<br>(195, 356)       | 7.4<br>(4.8, 8.9)  | 357<br>(263, 603)       | 3.8<br>(2.8, 6.4) | -48.1<br>(-62.9, 18.6)  |
| <b>Grenada</b>                              | 3<br>(3, 4)             | 4.8<br>(4.2, 5.5)  | 4<br>(4, 5)             | 2.9<br>(2.5, 3.4) | -38.5<br>(-45, -31)     |
| <b>Guyana</b>                               | 38<br>(33, 43)          | 8.5<br>(7.4, 9.8)  | 40<br>(33, 50)          | 6.1<br>(5, 7.3)   | -28.9<br>(-39.7, -16.5) |
| <b>Haiti</b>                                | 231<br>(155, 348)       | 6.6<br>(4.5, 10.1) | 392<br>(279, 588)       | 5.5<br>(4, 8.4)   | -15.9<br>(-34.7, 10.8)  |
| <b>Jamaica</b>                              | 35<br>(30, 41)          | 2<br>(1.7, 2.3)    | 44<br>(35, 58)          | 1.5<br>(1.2, 2)   | -25.2<br>(-40.9, 2.7)   |
| <b>Puerto Rico</b>                          | 231<br>(201, 262)       | 6.3<br>(5.5, 7.1)  | 207<br>(178, 238)       | 3.2<br>(2.8, 3.7) | -48.7<br>(-53.8, -42)   |
| <b>Saint Lucia</b>                          | 5<br>(4, 5)             | 5.2<br>(4.5, 6)    | 6<br>(5, 7)             | 2.8<br>(2.4, 3.3) | -45.6<br>(-51.9, -38.4) |
| <b>Saint Vincent and<br/>the Grenadines</b> | 3<br>(2, 3)             | 3.6<br>(3, 4.1)    | 4<br>(3, 4)             | 2.7<br>(2.3, 3.1) | -25<br>(-34.4, -12.4)   |
| <b>Suriname</b>                             | 16<br>(14, 19)          | 5.9<br>(5.1, 6.9)  | 28<br>(23, 32)          | 4.7<br>(3.9, 5.5) | -21.7<br>(-32.2, -9.8)  |
| <b>Trinidad and<br/>Tobago</b>              | 34<br>(30, 39)          | 3.8<br>(3.3, 4.3)  | 41<br>(32, 52)          | 2.3<br>(1.8, 2.9) | -40.1<br>(-51.6, -25.9) |
| <b>Virgin Islands</b>                       | 4<br>(4, 5)             | 4.8<br>(4, 5.6)    | 6<br>(5, 8)             | 3.7<br>(2.9, 4.4) | -23.4<br>(-38.6, -8.9)  |
| <b>Tropical Latin<br/>America</b>           | 6043<br>(5709, 6367)    | 5.7<br>(5.4, 6)    | 9676<br>(9169, 10175)   | 4<br>(3.8, 4.2)   | -29.9<br>(-33, -27.2)   |
| <b>Brazil</b>                               | 5971<br>(5640, 6292)    | 5.8<br>(5.5, 6.1)  | 9520<br>(9007, 9997)    | 4.1<br>(3.8, 4.3) | -30.2<br>(-33.2, -27.4) |
| <b>Paraguay</b>                             | 72<br>(58, 97)          | 3.1<br>(2.5, 4.1)  | 156<br>(119, 231)       | 2.8<br>(2.2, 4.1) | -7.8<br>(-28.3, 17.4)   |
| <b>East Asia</b>                            | 33749<br>(27528, 37632) | 3.5<br>(2.9, 3.9)  | 37564<br>(33346, 48492) | 1.8<br>(1.6, 2.4) | -47.3<br>(-54.6, -24.5) |
| <b>China</b>                                | 31317<br>(25280, 35024) | 3.4<br>(2.8, 3.8)  | 34198<br>(30212, 44510) | 1.8<br>(1.6, 2.3) | -48.3<br>(-55.8, -24.3) |

|                                   |                         |                      |                         |                      |                         |
|-----------------------------------|-------------------------|----------------------|-------------------------|----------------------|-------------------------|
| <b>North Korea</b>                | 625<br>(473, 814)       | 3.5<br>(2.7, 4.6)    | 1097<br>(783, 1457)     | 3.5<br>(2.5, 4.6)    | -1.9<br>(-26.6, 27)     |
| <b>Taiwan (province of China)</b> | 1244<br>(1079, 1419)    | 7.8<br>(6.7, 8.8)    | 1664<br>(1431, 1921)    | 4.5<br>(3.9, 5.2)    | -42.1<br>(-46.7, -36.3) |
| <b>Southeast Asia</b>             | 38269<br>(32943, 43413) | 13.5<br>(11.5, 15.4) | 61411<br>(54042, 69393) | 10.2<br>(9, 11.5)    | -24.5<br>(-33.1, -14.3) |
| <b>Cambodia</b>                   | 1158<br>(851, 1569)     | 23.8<br>(17.6, 31.8) | 2670<br>(2032, 3476)    | 23.4<br>(17.8, 30.1) | -1.7<br>(-22.5, 27.4)   |
| <b>Indonesia</b>                  | 24126<br>(20607, 26709) | 22.8<br>(19.1, 25.4) | 34444<br>(31516, 38528) | 16.7<br>(15.2, 18.5) | -26.9<br>(-35.9, -14.3) |
| <b>Laos</b>                       | 233<br>(160, 334)       | 10<br>(6.9, 14.2)    | 442<br>(296, 637)       | 9.7<br>(6.4, 13.9)   | -3<br>(-33.6, 40.6)     |
| <b>Malaysia</b>                   | 276<br>(220, 334)       | 2.8<br>(2.2, 3.4)    | 594<br>(465, 759)       | 2.3<br>(1.8, 2.9)    | -16.7<br>(-33.2, 1.9)   |
| <b>Maldives</b>                   | 3<br>(2, 4)             | 3<br>(2, 4.2)        | 5<br>(4, 7)             | 1.8<br>(1.3, 2.2)    | -42.2<br>(-58.4, -5.2)  |
| <b>Mauritius</b>                  | 68<br>(53, 84)          | 8.2<br>(6.5, 10.1)   | 69<br>(55, 88)          | 4.1<br>(3.3, 5.1)    | -49.7<br>(-55.4, -42.4) |
| <b>Myanmar</b>                    | 4734<br>(3301, 6469)    | 17.4<br>(11.9, 23.3) | 7034<br>(5293, 9041)    | 14.1<br>(10.7, 18)   | -18.8<br>(-39.2, 14.3)  |
| <b>Philippines</b>                | 1025<br>(805, 1285)     | 2.9<br>(2.3, 3.6)    | 3660<br>(2734, 4725)    | 4.8<br>(3.7, 6.2)    | 69<br>(41.6, 100.6)     |
| <b>Sri Lanka</b>                  | 990<br>(747, 1242)      | 8.2<br>(6.3, 10.1)   | 1223<br>(901, 1607)     | 5<br>(3.7, 6.5)      | -38.8<br>(-50.9, -24.9) |
| <b>Seychelles</b>                 | 4<br>(3, 5)             | 6.7<br>(5.1, 8.5)    | 8<br>(6, 10)            | 7<br>(5.5, 8.8)      | 4.8<br>(-10.8, 25.8)    |
| <b>Thailand</b>                   | 2466<br>(1981, 3021)    | 5.9<br>(4.8, 7.2)    | 4707<br>(3514, 5812)    | 4.8<br>(3.6, 5.9)    | -19.3<br>(-33.2, -1.1)  |
| <b>East Timor</b>                 | 24<br>(15, 36)          | 6.5<br>(3.9, 10)     | 66<br>(36, 97)          | 8.2<br>(4.7, 12)     | 25.7<br>(-11.4, 80.5)   |
| <b>Vietnam</b>                    | 3112<br>(2210, 4287)    | 7.6<br>(5.4, 10.5)   | 6407<br>(4842, 8512)    | 6.8<br>(5.1, 9)      | -11.3<br>(-38.3, 28.5)  |

|                                           |                         |                    |                         |                    |                         |
|-------------------------------------------|-------------------------|--------------------|-------------------------|--------------------|-------------------------|
| <b>Oceania</b>                            | 210<br>(177, 251)       | 5.6<br>(4.8, 6.6)  | 416<br>(336, 507)       | 5<br>(4.2, 6)      | -10.5<br>(-25.6, 8.6)   |
| <b>American Samoa</b>                     | 1<br>(1, 1)             | 3.4<br>(2.7, 4.3)  | 1<br>(1, 1)             | 2.8<br>(2.4, 3.3)  | -17.6<br>(-36.5, 2.6)   |
| <b>Federated States of<br/>Micronesia</b> | 3<br>(3, 5)             | 6.5<br>(4.9, 9.9)  | 3<br>(2, 5)             | 4.5<br>(3, 6.3)    | -31<br>(-49.4, -6)      |
| <b>Fiji</b>                               | 9<br>(7, 11)            | 2<br>(1.6, 2.4)    | 16<br>(14, 19)          | 2.1<br>(1.8, 2.5)  | 6.2<br>(-16.5, 35.7)    |
| <b>Guam</b>                               | 5<br>(4, 6)             | 5.3<br>(4.2, 6.3)  | 8<br>(7, 9)             | 4.3<br>(3.7, 5)    | -18.2<br>(-33.9, 5.7)   |
| <b>Kiribati</b>                           | 3<br>(2, 4)             | 6.1<br>(4.3, 8.8)  | 4<br>(3, 6)             | 5.5<br>(3.6, 8.4)  | -9.9<br>(-28.6, 12.3)   |
| <b>Marshall Islands</b>                   | 1<br>(1, 2)             | 6.7<br>(4.7, 8.3)  | 2<br>(1, 3)             | 5.5<br>(3.6, 7.5)  | -16.8<br>(-33.7, 3.9)   |
| <b>Northern Mariana<br/>Islands</b>       | 1<br>(1, 2)             | 5.1<br>(4.1, 6.4)  | 2<br>(2, 2)             | 3.9<br>(3.4, 4.5)  | -23.3<br>(-40.3, -4.8)  |
| <b>Papua New Guinea</b>                   | 150<br>(122, 184)       | 6.1<br>(5.1, 7.5)  | 314<br>(243, 401)       | 5.3<br>(4.2, 6.6)  | -13<br>(-31.1, 8.8)     |
| <b>Samoa</b>                              | 4<br>(3, 6)             | 4.5<br>(3.2, 7.1)  | 5<br>(4, 7)             | 3.7<br>(2.7, 5.3)  | -17.4<br>(-33.8, 2.6)   |
| <b>Solomon Islands</b>                    | 9<br>(7, 11)            | 5.3<br>(4.1, 6.5)  | 18<br>(14, 22)          | 4.6<br>(3.8, 5.5)  | -12.5<br>(-30.6, 9.4)   |
| <b>Tonga</b>                              | 3<br>(3, 4)             | 5.8<br>(4.9, 6.7)  | 5<br>(4, 6)             | 5.6<br>(4.5, 6.8)  | -3<br>(-21.6, 21)       |
| <b>Vanuatu</b>                            | 7<br>(3, 12)            | 8.9<br>(4.2, 14.8) | 14<br>(7, 25)           | 7.6<br>(3.6, 13.9) | -14.2<br>(-35.8, 15.2)  |
| <b>North Africa and<br/>Middle East</b>   | 16461<br>(11125, 20677) | 10.2<br>(6.5, 13)  | 27411<br>(20485, 34220) | 6.8<br>(5, 8.6)    | -33.3<br>(-47.1, -17.3) |
| <b>Afghanistan</b>                        | 528<br>(242, 868)       | 7.7<br>(3.6, 12.8) | 791<br>(480, 1154)      | 7.2<br>(4.5, 11.1) | -7<br>(-27.8, 57.8)     |
| <b>Algeria</b>                            | 591<br>(386, 932)       | 4.9<br>(3.1, 7.8)  | 1154<br>(844, 1573)     | 3.6<br>(2.6, 4.9)  | -26.5<br>(-43.2, -3)    |

|                     |                       |                      |                         |                      |                         |
|---------------------|-----------------------|----------------------|-------------------------|----------------------|-------------------------|
| <b>Bahrain</b>      | 15<br>(11, 18)        | 8<br>(5.9, 10.1)     | 34<br>(26, 42)          | 3.6<br>(2.7, 4.6)    | -54.6<br>(-62.5, -44.8) |
| <b>Egypt</b>        | 9766<br>(5894, 12352) | 43.8<br>(23.4, 56.8) | 15377<br>(10243, 21268) | 34.7<br>(20.8, 48.4) | -20.9<br>(-41.5, 1.1)   |
| <b>Iran</b>         | 1057<br>(886, 1227)   | 4.1<br>(3.4, 4.8)    | 2341<br>(2099, 2544)    | 3.5<br>(3.1, 3.8)    | -15.5<br>(-30.2, 1)     |
| <b>Iraq</b>         | 339<br>(254, 455)     | 4.2<br>(3.2, 5.6)    | 432<br>(350, 521)       | 1.8<br>(1.4, 2.2)    | -57.4<br>(-65.5, -46.7) |
| <b>Jordan</b>       | 69<br>(52, 93)        | 4.8<br>(3.5, 6.3)    | 170<br>(129, 211)       | 3.1<br>(2.3, 3.9)    | -35.9<br>(-52, -12.2)   |
| <b>Kuwait</b>       | 21<br>(17, 25)        | 2.6<br>(2.1, 3.1)    | 63<br>(48, 78)          | 2.3<br>(1.8, 2.8)    | -10.9<br>(-28.9, 5.1)   |
| <b>Lebanon</b>      | 107<br>(78, 138)      | 5<br>(3.7, 6.6)      | 189<br>(127, 258)       | 3.2<br>(2.1, 4.4)    | -35.1<br>(-60.5, -12.9) |
| <b>Libya</b>        | 111<br>(77, 164)      | 5.8<br>(4, 8.7)      | 214<br>(140, 292)       | 4.8<br>(3.2, 6.4)    | -18.3<br>(-42.2, 27.2)  |
| <b>Morocco</b>      | 750<br>(518, 1096)    | 5.3<br>(3.5, 7.9)    | 1300<br>(967, 1679)     | 4.3<br>(3.2, 5.6)    | -18.6<br>(-42.2, 15.4)  |
| <b>Palestine</b>    | 40<br>(28, 55)        | 4.5<br>(3.2, 6.2)    | 85<br>(68, 104)         | 3.6<br>(2.8, 4.5)    | -21<br>(-38.2, 10.3)    |
| <b>Oman</b>         | 33<br>(23, 45)        | 4.6<br>(3.1, 6.2)    | 70<br>(47, 93)          | 3.3<br>(2.3, 4.4)    | -26.8<br>(-47.8, -1.9)  |
| <b>Qatar</b>        | 10<br>(7, 13)         | 8.6<br>(6.3, 11)     | 45<br>(32, 60)          | 5.1<br>(3.7, 6.7)    | -41<br>(-54.4, -23.4)   |
| <b>Saudi Arabia</b> | 737<br>(300, 1049)    | 12.6<br>(4.7, 18)    | 1197<br>(751, 1585)     | 8.7<br>(4.8, 11.7)   | -30.6<br>(-52.8, 11)    |
| <b>Sudan</b>        | 777<br>(417, 1303)    | 8.7<br>(4.2, 15)     | 1133<br>(669, 1733)     | 6.5<br>(3.6, 10.2)   | -25.4<br>(-47.2, 12.5)  |
| <b>Syria</b>        | 298<br>(235, 370)     | 5.5<br>(4.3, 6.9)    | 588<br>(453, 755)       | 4.7<br>(3.7, 6.1)    | -14.1<br>(-34.1, 9.7)   |
| <b>Tunisia</b>      | 294<br>(200, 408)     | 6.3<br>(4.3, 8.9)    | 557<br>(414, 737)       | 4.8<br>(3.6, 6.4)    | -23.2<br>(-47.4, 10.1)  |

|                                    |                         |                     |                         |                      |                        |
|------------------------------------|-------------------------|---------------------|-------------------------|----------------------|------------------------|
| <b>Turkey</b>                      | 508<br>(337, 716)       | 1.4<br>(0.9, 2)     | 813<br>(644, 1024)      | 0.9<br>(0.7, 1.2)    | -34.2<br>(-54.4, -5.1) |
| <b>United Arab Emirates</b>        | 30<br>(12, 47)          | 5.9<br>(2.2, 9.2)   | 172<br>(79, 245)        | 4.3<br>(1.8, 6.1)    | -28.2<br>(-52.1, 12.1) |
| <b>Yemen</b>                       | 369<br>(186, 610)       | 7.5<br>(3.5, 12.9)  | 662<br>(449, 962)       | 5.3<br>(3.5, 7.8)    | -29.2<br>(-55.5, 23.6) |
| <b>South Asia</b>                  | 31893<br>(28294, 36259) | 4.9<br>(4.2, 5.5)   | 61624<br>(54056, 76037) | 4.4<br>(3.8, 5.4)    | -10.2<br>(-21.8, 10.1) |
| <b>Bangladesh</b>                  | 4548<br>(3011, 5816)    | 7.8<br>(5.3, 9.9)   | 6465<br>(5053, 8326)    | 5.2<br>(4.1, 6.7)    | -33.3<br>(-47.6, 3.5)  |
| <b>Bhutan</b>                      | 23<br>(17, 30)          | 7.7<br>(5.7, 10.3)  | 36<br>(24, 51)          | 5.5<br>(3.7, 7.7)    | -29.1<br>(-50.1, -0.8) |
| <b>India</b>                       | 17911<br>(15287, 22942) | 3.3<br>(2.8, 4.1)   | 36300<br>(31201, 50637) | 3.2<br>(2.7, 4.5)    | -3.1<br>(-15.8, 12.8)  |
| <b>Nepal</b>                       | 456<br>(325, 642)       | 4.1<br>(2.9, 5.6)   | 849<br>(584, 1178)      | 3.8<br>(2.7, 5.2)    | -6.5<br>(-32.9, 24.8)  |
| <b>Pakistan</b>                    | 8955<br>(5647, 11775)   | 14.6<br>(9.1, 19.4) | 17974<br>(13057, 22963) | 14.9<br>(10.6, 19.1) | 2<br>(-20, 35)         |
| <b>Southern sub-Saharan Africa</b> | 1821<br>(1427, 2086)    | 6<br>(4.5, 6.9)     | 2301<br>(1881, 2720)    | 3.9<br>(3.2, 4.6)    | -34<br>(-49.4, -12.5)  |
| <b>Botswana</b>                    | 41<br>(27, 59)          | 6.4<br>(4.3, 9.1)   | 67<br>(49, 94)          | 4.6<br>(3.5, 6.3)    | -29.2<br>(-47.2, -4.1) |
| <b>eSwatini</b>                    | 36<br>(26, 49)          | 10.5<br>(7.6, 14.5) | 46<br>(33, 62)          | 7.3<br>(5.4, 9.9)    | -31<br>(-51.4, -2.6)   |
| <b>Lesotho</b>                     | 63<br>(27, 98)          | 6<br>(2.5, 9.3)     | 75<br>(34, 116)         | 5.9<br>(2.7, 8.9)    | -2.5<br>(-35.2, 52.5)  |
| <b>Namibia</b>                     | 33<br>(16, 50)          | 4.4<br>(2.1, 6.7)   | 75<br>(45, 116)         | 5<br>(3, 7.6)        | 12.2<br>(-27.6, 67.6)  |
| <b>South Africa</b>                | 1279<br>(981, 1510)     | 5.4<br>(4, 6.5)     | 1538<br>(1377, 1717)    | 3.3<br>(3, 3.7)      | -38.8<br>(-48, -18.8)  |
| <b>Zimbabwe</b>                    | 369<br>(298, 440)       | 8.5<br>(6.9, 10.1)  | 500<br>(154, 889)       | 7<br>(2.1, 12.2)     | -17.6<br>(-76, 47.3)   |

|                                   |                      |                   |                      |                   |                         |
|-----------------------------------|----------------------|-------------------|----------------------|-------------------|-------------------------|
| <b>Western sub-Saharan Africa</b> | 4225<br>(2453, 6318) | 4.5<br>(2.6, 6.7) | 5691<br>(3574, 8317) | 2.9<br>(1.9, 4.3) | -34.7<br>(-51.4, -13.1) |
| <b>Benin</b>                      | 67<br>(44, 100)      | 3.2<br>(2.1, 4.8) | 99<br>(67, 141)      | 2<br>(1.3, 2.8)   | -37.7<br>(-67.2, -3.7)  |
| <b>Burkina Faso</b>               | 131<br>(97, 164)     | 3<br>(2.3, 3.8)   | 160<br>(12, 303)     | 1.8<br>(0.1, 3.3) | -40.9<br>(-96.1, 14.5)  |
| <b>Cameroon</b>                   | 198<br>(147, 256)    | 4.1<br>(3, 5.3)   | 334<br>(149, 514)    | 2.7<br>(1.2, 4.1) | -35<br>(-65.3, -6.3)    |
| <b>Cape Verde</b>                 | 3<br>(2, 4)          | 1.4<br>(1, 1.8)   | 8<br>(6, 9)          | 1.6<br>(1.3, 2)   | 19.8<br>(-10.3, 61.8)   |
| <b>Chad</b>                       | 76<br>(47, 113)      | 2.6<br>(1.6, 3.8) | 151<br>(108, 208)    | 2.5<br>(1.8, 3.5) | -1.4<br>(-26.3, 44.3)   |
| <b>Côte d'Ivoire</b>              | 155<br>(107, 217)    | 3.3<br>(2.3, 4.7) | 286<br>(204, 389)    | 2.5<br>(1.8, 3.3) | -25.8<br>(-51.2, 0.7)   |
| <b>The Gambia</b>                 | 10<br>(6, 15)        | 2.5<br>(1.5, 3.9) | 23<br>(16, 31)       | 2.3<br>(1.6, 3.1) | -8.5<br>(-37.3, 40.4)   |
| <b>Ghana</b>                      | 231<br>(176, 306)    | 3.4<br>(2.6, 4.4) | 347<br>(113, 637)    | 2.1<br>(0.7, 3.9) | -37<br>(-81.8, 9.3)     |
| <b>Guinea</b>                     | 103<br>(61, 179)     | 3<br>(1.8, 5.2)   | 131<br>(79, 207)     | 2.3<br>(1.4, 3.8) | -22.6<br>(-43, 18.8)    |
| <b>Guinea-Bissau</b>              | 16<br>(10, 23)       | 3.6<br>(2.3, 5.1) | 22<br>(15, 30)       | 2.8<br>(2, 3.8)   | -23.8<br>(-43.2, 8.7)   |
| <b>Liberia</b>                    | 48<br>(32, 69)       | 4.2<br>(2.8, 6)   | 53<br>(37, 74)       | 2.5<br>(1.8, 3.6) | -39.5<br>(-55, -21.7)   |
| <b>Mali</b>                       | 141<br>(86, 226)     | 3.4<br>(2, 5.5)   | 133<br>(46, 240)     | 1.5<br>(0.5, 2.7) | -55<br>(-88.4, -19.2)   |
| <b>Mauritania</b>                 | 30<br>(22, 43)       | 2.9<br>(2.1, 4)   | 35<br>(24, 51)       | 1.7<br>(1.2, 2.4) | -40.1<br>(-54.2, -22.9) |
| <b>Niger</b>                      | 75<br>(49, 126)      | 2.4<br>(1.6, 4)   | 107<br>(27, 191)     | 1.4<br>(0.3, 2.4) | -43.5<br>(-81.9, -12.6) |
| <b>Nigeria</b>                    | 2742<br>(1224, 4581) | 5.8<br>(2.6, 9.6) | 3539<br>(1458, 6248) | 3.9<br>(1.6, 6.9) | -32.2<br>(-51.9, -1.9)  |

|                                   |                        |                      |                         |                      |                         |
|-----------------------------------|------------------------|----------------------|-------------------------|----------------------|-------------------------|
| <b>São Tomé and Príncipe</b>      | 4<br>(2, 5)            | 5.7<br>(3.5, 7.7)    | 7<br>(5, 9)             | 5.9<br>(4.1, 8.3)    | 2.8<br>(-33.7, 56.6)    |
| <b>Senegal</b>                    | 71<br>(43, 105)        | 2.1<br>(1.2, 3.1)    | 113<br>(43, 179)        | 1.5<br>(0.6, 2.4)    | -28.5<br>(-57.7, -5.1)  |
| <b>Sierra Leone</b>               | 79<br>(51, 123)        | 3.9<br>(2.5, 6.1)    | 85<br>(33, 130)         | 2.3<br>(0.9, 3.5)    | -41.2<br>(-84.5, 12.4)  |
| <b>Togo</b>                       | 45<br>(33, 63)         | 3.3<br>(2.4, 4.6)    | 59<br>(19, 93)          | 1.5<br>(0.5, 2.4)    | -53.1<br>(-88, -15.4)   |
| <b>Eastern sub-Saharan Africa</b> | 11402<br>(8802, 14371) | 14.5<br>(11.4, 18.1) | 16741<br>(12400, 21230) | 10.3<br>(7.6, 13.2)  | -29.1<br>(-47.6, -5)    |
| <b>Burundi</b>                    | 489<br>(292, 753)      | 21.2<br>(13.5, 32.1) | 530<br>(156, 900)       | 12.1<br>(3.4, 20.8)  | -42.9<br>(-84.5, -6.2)  |
| <b>Comoros</b>                    | 14<br>(2, 25)          | 6.7<br>(0.8, 12.2)   | 28<br>(6, 48)           | 6.2<br>(1.2, 10.5)   | -7<br>(-29.4, 48.6)     |
| <b>Djibouti</b>                   | 14<br>(8, 21)          | 8.2<br>(5.2, 12.5)   | 44<br>(26, 67)          | 7.5<br>(4.4, 11.3)   | -8.4<br>(-37.2, 32.2)   |
| <b>Eritrea</b>                    | 158<br>(91, 257)       | 15.1<br>(9.4, 24.3)  | 352<br>(249, 498)       | 14.2<br>(10.1, 19.4) | -6.2<br>(-34.8, 45.1)   |
| <b>Ethiopia</b>                   | 3749<br>(2335, 5757)   | 18.6<br>(12, 27)     | 5444<br>(4577, 6565)    | 13.4<br>(11.3, 16.2) | -27.9<br>(-52, 19.2)    |
| <b>Kenya</b>                      | 654<br>(402, 966)      | 7.6<br>(4.7, 11.1)   | 1409<br>(919, 2047)     | 6.4<br>(4.2, 9.3)    | -15.8<br>(-48.9, 10.9)  |
| <b>Madagascar</b>                 | 595<br>(388, 908)      | 11<br>(7.2, 17.1)    | 929<br>(643, 1286)      | 8.4<br>(5.7, 11.5)   | -23.8<br>(-58.4, 21.5)  |
| <b>Malawi</b>                     | 687<br>(388, 972)      | 16.6<br>(10, 23)     | 805<br>(159, 1365)      | 10.4<br>(2, 17.6)    | -37.1<br>(-88.5, 25.3)  |
| <b>Mozambique</b>                 | 516<br>(315, 768)      | 8.3<br>(5, 12.3)     | 653<br>(101, 1140)      | 5.8<br>(0.9, 9.9)    | -30.4<br>(-89.4, 43.5)  |
| <b>Rwanda</b>                     | 1236<br>(958, 1508)    | 41.1<br>(32.5, 49.5) | 1256<br>(790, 1795)     | 21.5<br>(13.3, 30.4) | -47.7<br>(-69.2, -22.9) |
| <b>Somalia</b>                    | 296<br>(134, 533)      | 10.9<br>(5.6, 18.9)  | 773<br>(450, 1245)      | 11.9<br>(7, 19.2)    | 9.3<br>(-24.4, 71.4)    |



|                                   |                      |                      |                      |                     |                         |
|-----------------------------------|----------------------|----------------------|----------------------|---------------------|-------------------------|
| <b>South Sudan</b>                | 245<br>(131, 428)    | 10.1<br>(5.7, 17.1)  | 410<br>(252, 627)    | 10.5<br>(6.6, 15.9) | 4.1<br>(-28.2, 62.7)    |
| <b>Tanzania</b>                   | 1316<br>(914, 1767)  | 11.8<br>(8.4, 15.7)  | 1823<br>(696, 2903)  | 7.4<br>(2.8, 11.9)  | -36.6<br>(-75.5, 0)     |
| <b>Uganda</b>                     | 780<br>(458, 1190)   | 11.5<br>(6.7, 17.5)  | 1272<br>(490, 2005)  | 8.9<br>(3.3, 14.1)  | -22.5<br>(-57.7, 9.8)   |
| <b>Zambia</b>                     | 648<br>(458, 858)    | 21.4<br>(15.3, 28.5) | 1001<br>(747, 1277)  | 14.9<br>(11, 19.1)  | -30.3<br>(-45.3, -11.6) |
| <b>Central sub-Saharan Africa</b> | 3221<br>(2339, 4372) | 12.7<br>(9.1, 17.6)  | 6579<br>(5026, 8571) | 11.3<br>(8.4, 15.2) | -11.1<br>(-26.9, 11.1)  |
| <b>Angola</b>                     | 642<br>(342, 1038)   | 14.6<br>(7.6, 24.2)  | 1698<br>(1239, 2368) | 14<br>(10.2, 20.4)  | -3.6<br>(-34.2, 59.1)   |
| <b>Central African Republic</b>   | 169<br>(94, 246)     | 12.3<br>(6.8, 17.6)  | 226<br>(96, 375)     | 9<br>(3.7, 14.6)    | -27.1<br>(-50.8, -3.2)  |
| <b>Congo</b>                      | 187<br>(125, 283)    | 15.6<br>(10.4, 23.7) | 334<br>(218, 486)    | 12.1<br>(7.6, 17.9) | -22.5<br>(-42.2, 6.1)   |
| <b>DR Congo</b>                   | 2089<br>(1497, 2899) | 11.9<br>(8.6, 16.5)  | 4134<br>(2954, 5678) | 10.6<br>(7.5, 14.5) | -11.4<br>(-32.5, 12.7)  |
| <b>Equatorial Guinea</b>          | 24<br>(8, 42)        | 11<br>(3.4, 18.7)    | 46<br>(25, 74)       | 8.5<br>(4.5, 13.8)  | -22.5<br>(-51.7, 64.6)  |
| <b>Gabon</b>                      | 110<br>(72, 154)     | 18.5<br>(12.2, 26.9) | 142<br>(95, 211)     | 12.8<br>(8.3, 19.4) | -31.2<br>(-46.7, -11.7) |

**Appendix Table 13: Number of deaths and age-standardised death rates of cirrhosis due to alcohol-related liver disease per 100 000 in 1990 and 2017 for both sexes and the percentage change by location**

|                                  | 1990                       |                    | 2017                       |                   | Percentage change in age-standardised rates between 1990 and 2017 |
|----------------------------------|----------------------------|--------------------|----------------------------|-------------------|-------------------------------------------------------------------|
|                                  | Counts (95% UI)            | Rate (95% UI)      | Counts (95% UI)            | Rate (95% UI)     |                                                                   |
| <b>Global</b>                    | 215190<br>(194899, 234586) | 5.1<br>(4.6, 5.5)  | 332268<br>(302998, 373279) | 4.1<br>(3.7, 4.6) | -19.4<br>(-25, -10.7)                                             |
| <b>High-income North America</b> | 10978<br>(10403, 11511)    | 3.3<br>(3.1, 3.4)  | 18972<br>(17896, 20101)    | 3.4<br>(3.2, 3.6) | 2.3<br>(-1.9, 7.1)                                                |
| <b>Canada</b>                    | 959<br>(881, 1036)         | 3<br>(2.7, 3.2)    | 1540<br>(1380, 1712)       | 2.4<br>(2.2, 2.7) | -17.5<br>(-24.8, -9.6)                                            |
| <b>Greenland</b>                 | 1<br>(1, 2)                | 2.9<br>(2.4, 3.4)  | 2<br>(2, 3)                | 2.9<br>(2.1, 3.4) | 1.6<br>(-28.3, 29.9)                                              |
| <b>USA</b>                       | 10017<br>(9488, 10505)     | 3.3<br>(3.2, 3.5)  | 17430<br>(16416, 18494)    | 3.5<br>(3.3, 3.7) | 4.3<br>(-0.1, 9.6)                                                |
| <b>Australasia</b>               | 451<br>(412, 487)          | 2<br>(1.8, 2.1)    | 700<br>(612, 799)          | 1.6<br>(1.4, 1.8) | -20.3<br>(-29.1, -10.2)                                           |
| <b>Australia</b>                 | 396<br>(358, 430)          | 2.1<br>(1.9, 2.2)  | 621<br>(537, 718)          | 1.6<br>(1.4, 1.9) | -19.9<br>(-29.8, -8.3)                                            |
| <b>New Zealand</b>               | 55<br>(50, 59)             | 1.4<br>(1.3, 1.5)  | 79<br>(72, 88)             | 1.1<br>(1, 1.2)   | -23.9<br>(-30.7, -16.4)                                           |
| <b>High-income Asia Pacific</b>  | 9652<br>(8791, 10428)      | 4.6<br>(4.2, 5)    | 7754<br>(6852, 8547)       | 2.1<br>(1.8, 2.4) | -54.5<br>(-59.3, -49.5)                                           |
| <b>Brunei</b>                    | 3<br>(2, 5)                | 2.7<br>(2, 3.5)    | 6<br>(4, 8)                | 1.6<br>(1.1, 2.2) | -39.6<br>(-51.8, -17)                                             |
| <b>Japan</b>                     | 3671<br>(3417, 3923)       | 2.1<br>(2, 2.3)    | 3842<br>(3504, 4169)       | 1.2<br>(1.1, 1.3) | -43<br>(-46.7, -39.8)                                             |
| <b>Singapore</b>                 | 31<br>(26, 37)             | 1.2<br>(1, 1.5)    | 42<br>(34, 51)             | 0.6<br>(0.5, 0.7) | -52.5<br>(-58.2, -46.8)                                           |
| <b>South Korea</b>               | 5946<br>(5242, 6567)       | 16.9<br>(15, 18.5) | 3864<br>(3214, 4483)       | 4.5<br>(3.8, 5.2) | -73.2<br>(-77, -68.8)                                             |

|                       |                         |                   |                         |                   |                         |
|-----------------------|-------------------------|-------------------|-------------------------|-------------------|-------------------------|
| <b>Western Europe</b> | 35118<br>(30850, 39220) | 6.5<br>(5.7, 7.2) | 30953<br>(26859, 35057) | 4<br>(3.4, 4.4)   | -39.1<br>(-42.5, -35.3) |
| <b>Andorra</b>        | 3<br>(2, 4)             | 5.1<br>(3.6, 6.7) | 5<br>(3, 6)             | 3.5<br>(2.4, 4.6) | -32.3<br>(-50.3, -9.8)  |
| <b>Austria</b>        | 1126<br>(953, 1282)     | 10.6<br>(8.9, 12) | 878<br>(710, 1028)      | 5.6<br>(4.5, 6.5) | -46.9<br>(-52, -41.3)   |
| <b>Belgium</b>        | 902<br>(815, 988)       | 6.2<br>(5.7, 6.8) | 1073<br>(944, 1207)     | 5.3<br>(4.6, 6)   | -14.8<br>(-23, -6.6)    |
| <b>Cyprus</b>         | 38<br>(28, 51)          | 4.7<br>(3.5, 6.3) | 52<br>(42, 64)          | 2.8<br>(2.2, 3.5) | -39.7<br>(-54.4, -20.2) |
| <b>Denmark</b>        | 365<br>(312, 417)       | 5.3<br>(4.5, 6.1) | 448<br>(368, 524)       | 4.6<br>(3.7, 5.3) | -14.4<br>(-24.4, -2.7)  |
| <b>Finland</b>        | 259<br>(217, 302)       | 3.9<br>(3.3, 4.6) | 532<br>(428, 634)       | 5.8<br>(4.6, 6.9) | 47<br>(28.7, 66.9)      |
| <b>France</b>         | 6596<br>(5647, 7536)    | 8.6<br>(7.4, 9.8) | 4876<br>(4003, 5731)    | 4.3<br>(3.5, 5)   | -50.6<br>(-56.6, -44.9) |
| <b>Germany</b>        | 9797<br>(8359, 11159)   | 8.3<br>(7.1, 9.4) | 8893<br>(7237, 10713)   | 5.6<br>(4.5, 6.7) | -33.2<br>(-41.6, -23.6) |
| <b>Greece</b>         | 690<br>(572, 810)       | 4.5<br>(3.8, 5.3) | 543<br>(442, 644)       | 2.6<br>(2.1, 3)   | -43.1<br>(-48.9, -36.3) |
| <b>Iceland</b>        | 5<br>(4, 6)             | 1.8<br>(1.5, 2)   | 8<br>(6, 9)             | 1.5<br>(1.3, 1.8) | -12.8<br>(-22.8, -1.4)  |
| <b>Ireland</b>        | 81<br>(67, 95)          | 2<br>(1.7, 2.4)   | 173<br>(140, 206)       | 2.5<br>(2, 3)     | 23.4<br>(6.8, 39.7)     |
| <b>Israel</b>         | 135<br>(108, 163)       | 2.8<br>(2.3, 3.4) | 233<br>(184, 287)       | 2.1<br>(1.7, 2.6) | -24.8<br>(-32.1, -15.9) |
| <b>Italy</b>          | 3887<br>(3403, 4390)    | 4.4<br>(3.9, 5)   | 2174<br>(1882, 2493)    | 1.6<br>(1.4, 1.8) | -63.9<br>(-68.2, -59.3) |
| <b>Luxembourg</b>     | 42<br>(36, 49)          | 8<br>(6.7, 9.3)   | 46<br>(36, 56)          | 5<br>(3.9, 6.1)   | -37.3<br>(-48.2, -25.5) |
| <b>Malta</b>          | 15<br>(12, 17)          | 3.4<br>(2.8, 4)   | 18<br>(14, 21)          | 2.3<br>(1.9, 2.7) | -33.1<br>(-40.6, -24)   |

|                               |                         |                      |                         |                   |                         |
|-------------------------------|-------------------------|----------------------|-------------------------|-------------------|-------------------------|
| <b>Netherlands</b>            | 572<br>(482, 670)       | 2.9<br>(2.5, 3.4)    | 673<br>(553, 803)       | 2.1<br>(1.7, 2.5) | -28.6<br>(-34.8, -21.3) |
| <b>Norway</b>                 | 147<br>(134, 161)       | 2.5<br>(2.3, 2.7)    | 157<br>(139, 175)       | 1.8<br>(1.6, 2)   | -27.5<br>(-35.2, -21.6) |
| <b>Portugal</b>               | 1701<br>(1441, 1955)    | 12.8<br>(10.9, 14.6) | 937<br>(768, 1131)      | 4.7<br>(3.8, 5.7) | -63.1<br>(-67.4, -58.5) |
| <b>Spain</b>                  | 5882<br>(5094, 6563)    | 11<br>(9.6, 12.1)    | 4245<br>(3540, 4888)    | 4.7<br>(4, 5.4)   | -56.9<br>(-60.9, -52.2) |
| <b>Sweden</b>                 | 380<br>(351, 408)       | 2.9<br>(2.7, 3.1)    | 449<br>(401, 498)       | 2.4<br>(2.2, 2.7) | -16<br>(-22.9, -8.5)    |
| <b>Switzerland</b>            | 381<br>(320, 440)       | 3.9<br>(3.3, 4.5)    | 406<br>(327, 484)       | 2.6<br>(2.1, 3.1) | -33.9<br>(-42.4, -24)   |
| <b>UK</b>                     | 2082<br>(1945, 2207)    | 2.6<br>(2.5, 2.8)    | 4104<br>(3837, 4344)    | 4<br>(3.8, 4.3)   | 52.1<br>(46.7, 61)      |
| <b>Southern Latin America</b> | 3548<br>(3203, 3910)    | 7.5<br>(6.8, 8.2)    | 4437<br>(3848, 5028)    | 5.5<br>(4.8, 6.3) | -25.8<br>(-33.4, -18)   |
| <b>Argentina</b>              | 2067<br>(1870, 2273)    | 6.3<br>(5.7, 6.9)    | 2612<br>(2191, 3030)    | 5<br>(4.2, 5.9)   | -19.8<br>(-31.3, -8.6)  |
| <b>Chile</b>                  | 1324<br>(1170, 1482)    | 12.3<br>(10.8, 13.7) | 1678<br>(1421, 1943)    | 7.2<br>(6.1, 8.3) | -41.1<br>(-48.8, -32.7) |
| <b>Uruguay</b>                | 157<br>(140, 177)       | 4.1<br>(3.7, 4.6)    | 147<br>(125, 172)       | 2.9<br>(2.4, 3.4) | -29.7<br>(-39.4, -19.2) |
| <b>Eastern Europe</b>         | 10818<br>(10013, 11611) | 3.8<br>(3.5, 4.1)    | 29236<br>(27406, 31119) | 9.6<br>(9, 10.2)  | 151.5<br>(141.2, 163.3) |
| <b>Belarus</b>                | 334<br>(293, 377)       | 2.5<br>(2.2, 2.8)    | 1027<br>(867, 1183)     | 7.1<br>(6, 8.1)   | 177.6<br>(130.2, 222)   |
| <b>Estonia</b>                | 53<br>(47, 60)          | 2.6<br>(2.4, 3)      | 126<br>(105, 151)       | 6.2<br>(5.2, 7.5) | 136.7<br>(95.1, 180.8)  |
| <b>Latvia</b>                 | 92<br>(82, 104)         | 2.6<br>(2.3, 2.9)    | 174<br>(148, 201)       | 5.7<br>(4.8, 6.5) | 120.6<br>(89.1, 153.6)  |
| <b>Lithuania</b>              | 135<br>(122, 150)       | 3<br>(2.7, 3.3)      | 393<br>(349, 439)       | 9.1<br>(8, 10.1)  | 202.9<br>(174.6, 235.1) |

|                               |                         |                      |                         |                      |                         |
|-------------------------------|-------------------------|----------------------|-------------------------|----------------------|-------------------------|
| <b>Moldova</b>                | 1134<br>(1013, 1260)    | 23.9<br>(21.5, 26.4) | 1097<br>(956, 1222)     | 19.7<br>(17.3, 21.8) | -17.6<br>(-24.4, -11.3) |
| <b>Russia</b>                 | 6040<br>(5422, 6548)    | 3.3<br>(3, 3.6)      | 18683<br>(17546, 19773) | 8.9<br>(8.4, 9.4)    | 169.7<br>(153.9, 195.1) |
| <b>Ukraine</b>                | 3031<br>(2822, 3254)    | 4.3<br>(4, 4.6)      | 7735<br>(6977, 8500)    | 12.1<br>(10.9, 13.3) | 182.8<br>(152.9, 210)   |
| <b>Central Europe</b>         | 13005<br>(12183, 13917) | 8.6<br>(8.1, 9.2)    | 13626<br>(12563, 14656) | 7.1<br>(6.5, 7.6)    | -18<br>(-21.6, -14.4)   |
| <b>Albania</b>                | 79<br>(65, 89)          | 3.7<br>(2.9, 4.2)    | 113<br>(89, 152)        | 2.8<br>(2.2, 3.7)    | -25.1<br>(-42.6, 11.6)  |
| <b>Bosnia and Herzegovina</b> | 264<br>(237, 306)       | 5.9<br>(5.3, 6.6)    | 209<br>(175, 297)       | 3.6<br>(3, 5.1)      | -39.1<br>(-47.7, -20.7) |
| <b>Bulgaria</b>               | 802<br>(737, 866)       | 6.3<br>(5.8, 6.8)    | 894<br>(795, 988)       | 7.1<br>(6.3, 7.8)    | 12<br>(0.6, 24.5)       |
| <b>Croatia</b>                | 746<br>(688, 806)       | 11.3<br>(10.5, 12.2) | 471<br>(420, 526)       | 5.9<br>(5.3, 6.6)    | -47.8<br>(-52.3, -42.9) |
| <b>Czech Republic</b>         | 957<br>(888, 1037)      | 7.1<br>(6.6, 7.7)    | 1001<br>(899, 1110)     | 5.5<br>(5, 6.1)      | -23<br>(-30.8, -14.6)   |
| <b>Hungary</b>                | 2669<br>(2495, 2842)    | 19<br>(17.8, 20.2)   | 1403<br>(1258, 1557)    | 8.3<br>(7.4, 9.2)    | -56.6<br>(-60.4, -52.4) |
| <b>Montenegro</b>             | 14<br>(12, 17)          | 2.2<br>(1.8, 2.5)    | 20<br>(17, 24)          | 2.1<br>(1.8, 2.5)    | -3.9<br>(-23, 15.1)     |
| <b>North Macedonia</b>        | 56<br>(49, 68)          | 2.8<br>(2.5, 3.4)    | 89<br>(73, 103)         | 2.7<br>(2.2, 3.1)    | -6.3<br>(-23.9, 10.1)   |
| <b>Poland</b>                 | 2076<br>(1911, 2266)    | 4.6<br>(4.2, 5)      | 3514<br>(3176, 3874)    | 5.7<br>(5.2, 6.3)    | 24.4<br>(12.1, 38)      |
| <b>Romania</b>                | 3670<br>(3398, 3955)    | 12.7<br>(11.8, 13.7) | 4449<br>(4017, 4883)    | 13.2<br>(11.9, 14.4) | 3.4<br>(-4.1, 11.9)     |
| <b>Serbia</b>                 | 587<br>(461, 699)       | 4.8<br>(3.8, 5.7)    | 541<br>(473, 633)       | 3.7<br>(3.2, 4.2)    | -24.4<br>(-38, -4.9)    |
| <b>Slovakia</b>               | 740<br>(650, 919)       | 12.5<br>(11, 15.4)   | 692<br>(561, 794)       | 8.1<br>(6.5, 9.2)    | -35.4<br>(-53.4, -22.2) |

|                              |                         |                      |                         |                      |                         |
|------------------------------|-------------------------|----------------------|-------------------------|----------------------|-------------------------|
| <b>Slovenia</b>              | 345<br>(317, 370)       | 13.7<br>(12.6, 14.7) | 231<br>(204, 258)       | 6.1<br>(5.4, 6.8)    | -55.7<br>(-60, -50.9)   |
| <b>Central Asia</b>          | 4469<br>(4038, 4918)    | 9<br>(8.2, 9.9)      | 11285<br>(9912, 12533)  | 14.2<br>(12.5, 15.7) | 57<br>(43.9, 68.1)      |
| <b>Armenia</b>               | 145<br>(128, 164)       | 5.1<br>(4.5, 5.8)    | 386<br>(343, 434)       | 9.5<br>(8.4, 10.5)   | 84.3<br>(67.9, 101.7)   |
| <b>Azerbaijan</b>            | 477<br>(417, 536)       | 9.2<br>(7.9, 10.3)   | 1116<br>(893, 1361)     | 12.6<br>(9.9, 15.5)  | 37.8<br>(15.2, 68.5)    |
| <b>Georgia</b>               | 552<br>(498, 616)       | 8.7<br>(7.8, 9.7)    | 532<br>(464, 619)       | 9.9<br>(8.6, 11.4)   | 13.2<br>(1, 27.1)       |
| <b>Kazakhstan</b>            | 805<br>(717, 900)       | 6<br>(5.4, 6.7)      | 2708<br>(2179, 3148)    | 15.1<br>(12.3, 17.6) | 151.5<br>(106.8, 187.8) |
| <b>Kyrgyzstan</b>            | 363<br>(325, 404)       | 11.6<br>(10.3, 12.8) | 777<br>(652, 881)       | 15.4<br>(13.1, 17.4) | 32.8<br>(16.7, 47.1)    |
| <b>Mongolia</b>              | 226<br>(192, 266)       | 20.7<br>(17.9, 24)   | 503<br>(426, 582)       | 22.2<br>(17.9, 25.8) | 7.2<br>(-15.5, 26)      |
| <b>Tajikistan</b>            | 254<br>(219, 330)       | 8.5<br>(7.4, 11.1)   | 517<br>(441, 610)       | 8.8<br>(7.6, 10.6)   | 3.5<br>(-8.7, 17.4)     |
| <b>Turkmenistan</b>          | 274<br>(246, 305)       | 13.2<br>(11.8, 14.6) | 839<br>(742, 957)       | 18.5<br>(16.5, 21)   | 40.8<br>(26, 56.3)      |
| <b>Uzbekistan</b>            | 1372<br>(1222, 1522)    | 11.2<br>(10, 12.5)   | 3906<br>(3350, 4518)    | 15.6<br>(13.5, 17.8) | 39<br>(22.5, 57)        |
| <b>Central Latin America</b> | 11864<br>(11295, 12399) | 12.6<br>(12, 13.2)   | 21602<br>(20333, 23081) | 9.1<br>(8.5, 9.7)    | -28.1<br>(-31.7, -24.1) |
| <b>Colombia</b>              | 784<br>(727, 841)       | 4.3<br>(4, 4.6)      | 1559<br>(1351, 1800)    | 2.9<br>(2.5, 3.3)    | -33.2<br>(-41, -23.3)   |
| <b>Costa Rica</b>            | 130<br>(121, 139)       | 7<br>(6.5, 7.5)      | 344<br>(302, 391)       | 6.9<br>(6.1, 7.9)    | -1.6<br>(-12.3, 11.1)   |
| <b>El Salvador</b>           | 324<br>(279, 354)       | 10.1<br>(8.7, 11.1)  | 544<br>(434, 722)       | 9.6<br>(7.6, 12.7)   | -5.6<br>(-25.3, 31)     |
| <b>Guatemala</b>             | 667<br>(615, 718)       | 15.3<br>(14, 16.5)   | 1542<br>(1353, 1752)    | 13.2<br>(11.6, 15)   | -13.5<br>(-24.7, -1.1)  |

|                             |                      |                      |                         |                      |                         |
|-----------------------------|----------------------|----------------------|-------------------------|----------------------|-------------------------|
| <b>Honduras</b>             | 292<br>(237, 413)    | 12.6<br>(10.2, 17.3) | 785<br>(568, 1085)      | 12.5<br>(9, 17.3)    | -0.3<br>(-23, 25.1)     |
| <b>Mexico</b>               | 8620<br>(8224, 8981) | 17.7<br>(16.9, 18.5) | 14811<br>(13974, 15717) | 12.6<br>(11.9, 13.4) | -29.1<br>(-32.4, -25.4) |
| <b>Nicaragua</b>            | 151<br>(133, 169)    | 8.6<br>(7.5, 9.6)    | 402<br>(289, 479)       | 8.4<br>(6, 9.9)      | -2.6<br>(-25.2, 15)     |
| <b>Panama</b>               | 75<br>(68, 82)       | 4.9<br>(4.5, 5.4)    | 173<br>(156, 192)       | 4.4<br>(3.9, 4.8)    | -11.9<br>(-20.9, -1.8)  |
| <b>Venezuela</b>            | 820<br>(763, 880)    | 7.8<br>(7.2, 8.4)    | 1444<br>(1203, 1733)    | 5<br>(4.2, 5.9)      | -36.3<br>(-47.3, -24.1) |
| <b>Andean Latin America</b> | 2297<br>(2046, 2637) | 10.4<br>(9.3, 12)    | 4283<br>(3745, 4838)    | 7.9<br>(6.9, 8.9)    | -24.3<br>(-34.5, -13.3) |
| <b>Bolivia</b>              | 392<br>(280, 542)    | 11.6<br>(8.5, 15.9)  | 819<br>(617, 1076)      | 9.5<br>(7.2, 12.5)   | -18<br>(-37.7, 11.4)    |
| <b>Ecuador</b>              | 468<br>(427, 511)    | 8<br>(7.3, 8.8)      | 1140<br>(991, 1304)     | 7.7<br>(6.7, 8.8)    | -3.8<br>(-14.7, 8.2)    |
| <b>Peru</b>                 | 1438<br>(1262, 1652) | 11.2<br>(9.8, 13)    | 2325<br>(1905, 2771)    | 7.6<br>(6.2, 9)      | -32.4<br>(-45.3, -18.2) |
| <b>Caribbean</b>            | 1841<br>(1595, 2091) | 6.9<br>(5.9, 7.8)    | 2541<br>(2160, 3086)    | 5<br>(4.2, 6.1)      | -27.4<br>(-35, -9.5)    |
| <b>Antigua and Barbuda</b>  | 3<br>(2, 3)          | 5.6<br>(4.8, 6.3)    | 4<br>(3, 4)             | 3.6<br>(3.1, 4.2)    | -35.2<br>(-42.6, -25.8) |
| <b>The Bahamas</b>          | 15<br>(13, 17)       | 8.7<br>(7.7, 9.8)    | 20<br>(17, 23)          | 4.9<br>(4.2, 5.7)    | -43.8<br>(-51.7, -35.2) |
| <b>Barbados</b>             | 12<br>(11, 14)       | 4.4<br>(3.9, 4.9)    | 13<br>(11, 15)          | 2.8<br>(2.4, 3.3)    | -35.4<br>(-43.6, -26.1) |
| <b>Belize</b>               | 7<br>(6, 8)          | 7.2<br>(6.2, 8.2)    | 20<br>(17, 22)          | 7<br>(6.1, 8)        | -2.5<br>(-13.4, 9.3)    |
| <b>Bermuda</b>              | 3<br>(3, 4)          | 5.4<br>(4.7, 6.2)    | 3<br>(2, 3)             | 2.1<br>(1.8, 2.5)    | -61.4<br>(-67.1, -52.5) |
| <b>Cuba</b>                 | 354<br>(315, 399)    | 3.4<br>(3, 3.8)      | 649<br>(535, 775)       | 3.6<br>(3, 4.3)      | 5.6<br>(-8.3, 21.5)     |

|                                         |                         |                      |                         |                    |                         |
|-----------------------------------------|-------------------------|----------------------|-------------------------|--------------------|-------------------------|
| <b>Dominica</b>                         | 3<br>(3, 4)             | 4.9<br>(4.4, 5.6)    | 3<br>(3, 4)             | 3.8<br>(3.3, 4.3)  | -22.7<br>(-31.7, -12.9) |
| <b>Dominican Republic</b>               | 455<br>(305, 536)       | 11.6<br>(7.6, 13.7)  | 571<br>(425, 956)       | 6.2<br>(4.6, 10.2) | -46.8<br>(-61.7, 20.8)  |
| <b>Grenada</b>                          | 5<br>(5, 6)             | 7.9<br>(7, 9)        | 7<br>(6, 7)             | 4.7<br>(4, 5.3)    | -41.2<br>(-47.8, -34)   |
| <b>Guyana</b>                           | 61<br>(55, 68)          | 14.1<br>(12.6, 15.7) | 62<br>(52, 75)          | 9.3<br>(7.9, 11.1) | -33.9<br>(-43.6, -22.2) |
| <b>Haiti</b>                            | 342<br>(229, 510)       | 9.7<br>(6.6, 15)     | 581<br>(404, 901)       | 8.2<br>(5.7, 12.8) | -15.9<br>(-34.9, 11.1)  |
| <b>Jamaica</b>                          | 50<br>(43, 57)          | 2.8<br>(2.5, 3.2)    | 62<br>(48, 81)          | 2.1<br>(1.6, 2.8)  | -25.5<br>(-42, 3.1)     |
| <b>Puerto Rico</b>                      | 373<br>(332, 414)       | 10.2<br>(9.1, 11.3)  | 325<br>(283, 369)       | 5.1<br>(4.5, 5.8)  | -49.7<br>(-54.4, -43.9) |
| <b>Saint Lucia</b>                      | 8<br>(7, 9)             | 8.7<br>(7.8, 9.7)    | 10<br>(8, 11)           | 4.5<br>(3.9, 5.2)  | -48.6<br>(-54.1, -41.6) |
| <b>Saint Vincent and the Grenadines</b> | 4<br>(4, 5)             | 5.6<br>(4.8, 6.3)    | 6<br>(5, 7)             | 4.2<br>(3.7, 5)    | -24.5<br>(-34.4, -12.6) |
| <b>Suriname</b>                         | 24<br>(21, 27)          | 8.9<br>(7.7, 10.1)   | 43<br>(37, 51)          | 7.3<br>(6.2, 8.5)  | -18<br>(-29.7, -4.2)    |
| <b>Trinidad and Tobago</b>              | 50<br>(44, 56)          | 5.6<br>(5, 6.3)      | 60<br>(47, 76)          | 3.3<br>(2.6, 4.2)  | -41.3<br>(-52.9, -27.8) |
| <b>Virgin Islands</b>                   | 7<br>(6, 9)             | 8<br>(6.9, 9.3)      | 11<br>(9, 14)           | 6.2<br>(4.9, 7.6)  | -22.2<br>(-38.3, -6.7)  |
| <b>Tropical Latin America</b>           | 5030<br>(4760, 5319)    | 4.8<br>(4.5, 5.1)    | 8164<br>(7657, 8651)    | 3.4<br>(3.2, 3.6)  | -29.6<br>(-32.6, -26.6) |
| <b>Brazil</b>                           | 4946<br>(4677, 5238)    | 4.8<br>(4.6, 5.1)    | 7984<br>(7488, 8468)    | 3.4<br>(3.2, 3.6)  | -29.9<br>(-32.9, -26.9) |
| <b>Paraguay</b>                         | 84<br>(69, 119)         | 3.6<br>(3, 5)        | 180<br>(135, 276)       | 3.3<br>(2.5, 5)    | -10.3<br>(-31.9, 16.7)  |
| <b>East Asia</b>                        | 25807<br>(20853, 28549) | 2.7<br>(2.2, 2.9)    | 30306<br>(27061, 39325) | 1.5<br>(1.3, 1.9)  | -45<br>(-52.2, -22)     |



|                                   |                         |                   |                         |                     |                         |
|-----------------------------------|-------------------------|-------------------|-------------------------|---------------------|-------------------------|
| <b>China</b>                      | 24055<br>(19228, 26604) | 2.6<br>(2.1, 2.9) | 27846<br>(24769, 36498) | 1.4<br>(1.3, 1.9)   | -45.9<br>(-53.5, -21.7) |
| <b>North Korea</b>                | 453<br>(350, 585)       | 2.5<br>(2, 3.2)   | 783<br>(571, 1070)      | 2.4<br>(1.8, 3.3)   | -2.9<br>(-28.4, 28.4)   |
| <b>Taiwan (province of China)</b> | 869<br>(779, 972)       | 5.4<br>(4.8, 6)   | 1189<br>(1046, 1344)    | 3.2<br>(2.8, 3.6)   | -40.4<br>(-45.1, -34.5) |
| <b>Southeast Asia</b>             | 14775<br>(12078, 17669) | 5.3<br>(4.4, 6.3) | 26282<br>(21815, 31232) | 4.3<br>(3.6, 5.1)   | -18.7<br>(-28.4, -7.1)  |
| <b>Cambodia</b>                   | 577<br>(414, 791)       | 12<br>(8.8, 16.1) | 1496<br>(1118, 2007)    | 13.1<br>(9.9, 17.3) | 8.5<br>(-14.5, 41)      |
| <b>Indonesia</b>                  | 6691<br>(5477, 7806)    | 6.5<br>(5.3, 7.6) | 9763<br>(8533, 11353)   | 4.8<br>(4.1, 5.5)   | -27<br>(-36.4, -13.6)   |
| <b>Laos</b>                       | 154<br>(103, 214)       | 6.7<br>(4.6, 9.3) | 287<br>(189, 421)       | 6.3<br>(4.2, 9.2)   | -5.4<br>(-35.1, 35.9)   |
| <b>Malaysia</b>                   | 260<br>(204, 321)       | 2.6<br>(2, 3.2)   | 554<br>(426, 743)       | 2.1<br>(1.6, 2.9)   | -18.5<br>(-34.8, -0.6)  |
| <b>Maldives</b>                   | 2<br>(1, 2)             | 1.8<br>(1.1, 2.5) | 3<br>(2, 4)             | 1<br>(0.7, 1.3)     | -42.2<br>(-57.9, -4.5)  |
| <b>Mauritius</b>                  | 46<br>(36, 57)          | 5.5<br>(4.3, 6.9) | 45<br>(35, 57)          | 2.7<br>(2.1, 3.3)   | -51.8<br>(-57.3, -44.8) |
| <b>Myanmar</b>                    | 2428<br>(1604, 3368)    | 9<br>(6, 12.5)    | 3708<br>(2747, 4887)    | 7.4<br>(5.6, 9.6)   | -17.7<br>(-39.5, 18.3)  |
| <b>Philippines</b>                | 680<br>(532, 844)       | 1.9<br>(1.5, 2.4) | 2378<br>(1797, 3094)    | 3.1<br>(2.4, 4)     | 62.5<br>(35.6, 94.2)    |
| <b>Sri Lanka</b>                  | 556<br>(415, 705)       | 4.6<br>(3.6, 5.7) | 714<br>(527, 948)       | 2.9<br>(2.2, 3.8)   | -37.3<br>(-50.1, -22.1) |
| <b>Seychelles</b>                 | 2<br>(2, 3)             | 4<br>(3.1, 5.2)   | 5<br>(4, 6)             | 4.2<br>(3.3, 5.3)   | 5.4<br>(-11.3, 27.9)    |
| <b>Thailand</b>                   | 1531<br>(1179, 1927)    | 3.7<br>(2.9, 4.7) | 3029<br>(2244, 3840)    | 3<br>(2.3, 3.8)     | -18.5<br>(-32.8, -0.4)  |
| <b>East Timor</b>                 | 12<br>(7, 18)           | 3.5<br>(2.1, 5.4) | 35<br>(20, 53)          | 4.4<br>(2.5, 6.6)   | 26.2<br>(-9.2, 80.4)    |

|                                           |                      |                    |                      |                   |                         |
|-------------------------------------------|----------------------|--------------------|----------------------|-------------------|-------------------------|
| <b>Vietnam</b>                            | 1816<br>(1290, 2464) | 4.5<br>(3.2, 6.1)  | 4230<br>(3132, 5739) | 4.4<br>(3.3, 6)   | -0.9<br>(-31.3, 44.6)   |
| <b>Oceania</b>                            | 142<br>(117, 170)    | 3.9<br>(3.2, 4.6)  | 279<br>(225, 344)    | 3.4<br>(2.8, 4.1) | -11.8<br>(-28.1, 7.3)   |
| <b>American Samoa</b>                     | 1<br>(0, 1)          | 2.4<br>(1.9, 3)    | 1<br>(1, 1)          | 1.9<br>(1.6, 2.3) | -21.4<br>(-39.5, -0.5)  |
| <b>Federated States of<br/>Micronesia</b> | 2<br>(2, 4)          | 4.3<br>(3.2, 6.7)  | 2<br>(1, 3)          | 2.9<br>(1.9, 4.1) | -33.9<br>(-52.1, -7.6)  |
| <b>Fiji</b>                               | 5<br>(4, 7)          | 1.3<br>(1, 1.5)    | 10<br>(8, 13)        | 1.3<br>(1.1, 1.6) | 6.3<br>(-17.8, 37.3)    |
| <b>Guam</b>                               | 3<br>(3, 4)          | 4<br>(3.1, 4.8)    | 6<br>(5, 7)          | 3.2<br>(2.8, 3.8) | -18.8<br>(-34.6, 6.1)   |
| <b>Kiribati</b>                           | 2<br>(1, 2)          | 3.8<br>(2.7, 5.5)  | 3<br>(2, 4)          | 3.4<br>(2.2, 5.1) | -11.7<br>(-30.5, 11.6)  |
| <b>Marshall Islands</b>                   | 1<br>(1, 1)          | 4.5<br>(3.1, 5.7)  | 1<br>(1, 2)          | 3.8<br>(2.4, 5.1) | -16.8<br>(-34.4, 3.8)   |
| <b>Northern Mariana<br/>Islands</b>       | 1<br>(1, 1)          | 3.6<br>(2.9, 4.6)  | 1<br>(1, 2)          | 2.7<br>(2.3, 3.2) | -24.5<br>(-42.4, -6.3)  |
| <b>Papua New Guinea</b>                   | 102<br>(82, 127)     | 4.3<br>(3.6, 5.3)  | 212<br>(161, 272)    | 3.7<br>(2.9, 4.6) | -14.5<br>(-34, 8.2)     |
| <b>Samoa</b>                              | 3<br>(2, 4)          | 3.1<br>(2.2, 4.9)  | 3<br>(2, 5)          | 2.5<br>(1.8, 3.6) | -18.6<br>(-35.9, 1)     |
| <b>Solomon Islands</b>                    | 6<br>(4, 7)          | 3.5<br>(2.7, 4.4)  | 12<br>(9, 14)        | 3.1<br>(2.5, 3.8) | -12.6<br>(-31.2, 9.3)   |
| <b>Tonga</b>                              | 2<br>(2, 3)          | 3.8<br>(3.1, 4.5)  | 3<br>(2, 4)          | 3.7<br>(2.9, 4.6) | -1.9<br>(-20.9, 23.7)   |
| <b>Vanuatu</b>                            | 5<br>(2, 8)          | 5.7<br>(2.7, 10.1) | 9<br>(4, 16)         | 4.8<br>(2.3, 9.2) | -15.9<br>(-37, 14)      |
| <b>North Africa and<br/>Middle East</b>   | 2414<br>(1689, 3008) | 1.5<br>(1, 1.9)    | 4131<br>(3207, 5039) | 1<br>(0.8, 1.2)   | -31.4<br>(-46.3, -15.4) |
| <b>Afghanistan</b>                        | 84<br>(39, 134)      | 1.2<br>(0.6, 2)    | 120<br>(74, 174)     | 1.1<br>(0.7, 1.7) | -8.5<br>(-30, 59.7)     |

|                     |                     |                   |                      |                   |                         |
|---------------------|---------------------|-------------------|----------------------|-------------------|-------------------------|
| <b>Algeria</b>      | 91<br>(58, 145)     | 0.8<br>(0.5, 1.2) | 183<br>(133, 251)    | 0.6<br>(0.4, 0.8) | -25.3<br>(-42.5, -2.4)  |
| <b>Bahrain</b>      | 3<br>(2, 3)         | 1.4<br>(1.1, 1.8) | 6<br>(5, 8)          | 0.6<br>(0.5, 0.8) | -56.9<br>(-64.7, -46.5) |
| <b>Egypt</b>        | 1302<br>(805, 1586) | 5.8<br>(3.2, 7.1) | 2132<br>(1476, 2953) | 4.6<br>(2.9, 6.4) | -19.3<br>(-40.9, 5.4)   |
| <b>Iran</b>         | 131<br>(107, 154)   | 0.5<br>(0.4, 0.6) | 291<br>(259, 320)    | 0.4<br>(0.4, 0.5) | -16.3<br>(-31.1, 1.8)   |
| <b>Iraq</b>         | 54<br>(41, 71)      | 0.7<br>(0.5, 0.9) | 69<br>(57, 84)       | 0.3<br>(0.2, 0.3) | -57.4<br>(-66, -45)     |
| <b>Jordan</b>       | 11<br>(8, 14)       | 0.7<br>(0.5, 1)   | 27<br>(21, 34)       | 0.5<br>(0.4, 0.6) | -33.8<br>(-49.8, -7)    |
| <b>Kuwait</b>       | 3<br>(3, 4)         | 0.4<br>(0.4, 0.5) | 11<br>(8, 13)        | 0.4<br>(0.3, 0.5) | -9.2<br>(-27.2, 7.7)    |
| <b>Lebanon</b>      | 18<br>(14, 24)      | 0.9<br>(0.6, 1.1) | 31<br>(21, 41)       | 0.5<br>(0.4, 0.7) | -38.6<br>(-63.2, -17.6) |
| <b>Libya</b>        | 18<br>(12, 26)      | 0.9<br>(0.6, 1.4) | 34<br>(22, 47)       | 0.7<br>(0.5, 1)   | -18.8<br>(-44, 26.5)    |
| <b>Morocco</b>      | 113<br>(77, 167)    | 0.8<br>(0.5, 1.2) | 197<br>(152, 257)    | 0.6<br>(0.5, 0.8) | -18.9<br>(-42.8, 16.8)  |
| <b>Palestine</b>    | 6<br>(4, 8)         | 0.7<br>(0.5, 1)   | 13<br>(11, 16)       | 0.6<br>(0.4, 0.7) | -20.8<br>(-39.1, 13.2)  |
| <b>Oman</b>         | 5<br>(3, 7)         | 0.7<br>(0.5, 1)   | 12<br>(8, 16)        | 0.6<br>(0.4, 0.7) | -23.3<br>(-46.1, 5)     |
| <b>Qatar</b>        | 2<br>(1, 2)         | 1.4<br>(1, 1.9)   | 8<br>(6, 11)         | 0.9<br>(0.6, 1.1) | -39.5<br>(-54.2, -20.6) |
| <b>Saudi Arabia</b> | 93<br>(37, 135)     | 1.6<br>(0.6, 2.3) | 156<br>(98, 209)     | 1.1<br>(0.6, 1.5) | -29<br>(-52.3, 12.7)    |
| <b>Sudan</b>        | 132<br>(67, 225)    | 1.5<br>(0.7, 2.6) | 199<br>(111, 314)    | 1.1<br>(0.6, 1.9) | -22.6<br>(-45.9, 18)    |
| <b>Syria</b>        | 45<br>(35, 56)      | 0.8<br>(0.7, 1.1) | 93<br>(71, 119)      | 0.7<br>(0.6, 1)   | -11<br>(-31.1, 15.3)    |

|                                    |                         |                     |                          |                   |                         |
|------------------------------------|-------------------------|---------------------|--------------------------|-------------------|-------------------------|
| <b>Tunisia</b>                     | 38<br>(25, 54)          | 0.8<br>(0.5, 1.1)   | 72<br>(51, 97)           | 0.6<br>(0.4, 0.8) | -22.1<br>(-47.4, 13.7)  |
| <b>Turkey</b>                      | 199<br>(133, 274)       | 0.6<br>(0.4, 0.8)   | 336<br>(277, 407)        | 0.4<br>(0.3, 0.5) | -30.5<br>(-51.9, 1.6)   |
| <b>United Arab Emirates</b>        | 6<br>(2, 9)             | 1.2<br>(0.4, 1.8)   | 33<br>(16, 47)           | 0.8<br>(0.3, 1.1) | -32.7<br>(-56.5, 6.1)   |
| <b>Yemen</b>                       | 59<br>(28, 101)         | 1.2<br>(0.5, 2.1)   | 105<br>(69, 156)         | 0.8<br>(0.6, 1.3) | -28.6<br>(-54.7, 27.2)  |
| <b>South Asia</b>                  | 41714<br>(35585, 49680) | 6.2<br>(5.4, 7.3)   | 86765<br>(75288, 114808) | 6.2<br>(5.3, 8.2) | -1.5<br>(-12.7, 17)     |
| <b>Bangladesh</b>                  | 4802<br>(3286, 6215)    | 8.7<br>(5.9, 11.3)  | 7302<br>(5486, 9386)     | 6<br>(4.5, 7.7)   | -31.7<br>(-46.3, 5.7)   |
| <b>Bhutan</b>                      | 29<br>(20, 40)          | 10.3<br>(7.3, 13.9) | 47<br>(31, 67)           | 7.3<br>(5, 10.4)  | -29.2<br>(-50.5, 1.5)   |
| <b>India</b>                       | 33225<br>(28115, 42426) | 6.1<br>(5.2, 7.7)   | 72040<br>(62060, 99290)  | 6.3<br>(5.4, 8.7) | 2.1<br>(-11.4, 19.3)    |
| <b>Nepal</b>                       | 1279<br>(935, 1706)     | 11.6<br>(8.5, 15.5) | 2650<br>(1905, 3511)     | 12<br>(8.7, 15.9) | 2.9<br>(-25.7, 38.4)    |
| <b>Pakistan</b>                    | 2379<br>(1423, 3329)    | 4<br>(2.4, 5.6)     | 4725<br>(3250, 6349)     | 4.1<br>(2.8, 5.5) | 2.3<br>(-19.7, 37.6)    |
| <b>Southern sub-Saharan Africa</b> | 1132<br>(877, 1309)     | 3.7<br>(2.8, 4.3)   | 1335<br>(1125, 1565)     | 2.3<br>(1.9, 2.7) | -38.7<br>(-51.9, -19.4) |
| <b>Botswana</b>                    | 22<br>(14, 31)          | 3.4<br>(2.2, 4.9)   | 36<br>(26, 52)           | 2.5<br>(1.8, 3.5) | -27.9<br>(-46.2, -1.6)  |
| <b>eSwatini</b>                    | 19<br>(14, 26)          | 5.6<br>(4, 7.8)     | 23<br>(17, 31)           | 3.7<br>(2.7, 5)   | -34.6<br>(-55.3, -6.6)  |
| <b>Lesotho</b>                     | 34<br>(15, 53)          | 3.2<br>(1.4, 5)     | 41<br>(19, 64)           | 3.2<br>(1.5, 4.9) | -1.9<br>(-35, 57.8)     |
| <b>Namibia</b>                     | 17<br>(8, 25)           | 2.2<br>(1.1, 3.4)   | 46<br>(27, 71)           | 3<br>(1.8, 4.7)   | 36<br>(-11.5, 104.2)    |
| <b>South Africa</b>                | 851<br>(647, 1010)      | 3.6<br>(2.7, 4.4)   | 942<br>(817, 1064)       | 2<br>(1.8, 2.3)   | -44.3<br>(-52.5, -26.9) |

|                                   |                        |                    |                        |                    |                         |
|-----------------------------------|------------------------|--------------------|------------------------|--------------------|-------------------------|
| <b>Zimbabwe</b>                   | 189<br>(150, 226)      | 4.4<br>(3.5, 5.2)  | 248<br>(76, 447)       | 3.5<br>(1, 6.2)    | -20.5<br>(-76.8, 45)    |
| <b>Western sub-Saharan Africa</b> | 10916<br>(6147, 16263) | 11.4<br>(6.4, 17)  | 14465<br>(8900, 20856) | 7.3<br>(4.5, 10.4) | -36<br>(-52.3, -13.6)   |
| <b>Benin</b>                      | 139<br>(92, 200)       | 6.6<br>(4.3, 9.5)  | 214<br>(148, 309)      | 4.2<br>(2.9, 6)    | -35.8<br>(-66, -1.8)    |
| <b>Burkina Faso</b>               | 295<br>(222, 364)      | 6.6<br>(5.1, 8)    | 366<br>(26, 695)       | 4<br>(0.3, 7.5)    | -40.3<br>(-96.1, 18.3)  |
| <b>Cameroon</b>                   | 424<br>(326, 528)      | 8.6<br>(6.6, 10.7) | 760<br>(337, 1175)     | 5.9<br>(2.6, 9.2)  | -31.2<br>(-63.9, -0.9)  |
| <b>Cape Verde</b>                 | 6<br>(5, 8)            | 2.9<br>(2.2, 3.7)  | 17<br>(14, 20)         | 3.6<br>(3.1, 4.2)  | 24.1<br>(-7.6, 67.8)    |
| <b>Chad</b>                       | 149<br>(94, 213)       | 5<br>(3.1, 7.3)    | 326<br>(233, 435)      | 5.4<br>(3.8, 7.2)  | 7.4<br>(-20.8, 57.2)    |
| <b>Côte d'Ivoire</b>              | 337<br>(242, 459)      | 7<br>(5, 9.7)      | 649<br>(481, 875)      | 5.4<br>(4.1, 7.4)  | -22.9<br>(-49.5, 5.4)   |
| <b>The Gambia</b>                 | 21<br>(12, 32)         | 5.2<br>(3.1, 8)    | 49<br>(35, 64)         | 4.9<br>(3.5, 6.4)  | -6.5<br>(-36.9, 47.6)   |
| <b>Ghana</b>                      | 472<br>(370, 618)      | 6.7<br>(5.3, 8.7)  | 733<br>(225, 1409)     | 4.4<br>(1.3, 8.3)  | -35.2<br>(-81.8, 15.8)  |
| <b>Guinea</b>                     | 199<br>(115, 322)      | 5.7<br>(3.3, 9.4)  | 264<br>(164, 421)      | 4.7<br>(2.9, 7.5)  | -18.9<br>(-41, 24)      |
| <b>Guinea-Bissau</b>              | 33<br>(22, 47)         | 7.5<br>(4.8, 10.5) | 47<br>(34, 65)         | 5.8<br>(4.3, 8)    | -22.7<br>(-43.5, 12.3)  |
| <b>Liberia</b>                    | 111<br>(75, 155)       | 9.5<br>(6.4, 13.4) | 118<br>(84, 165)       | 5.5<br>(3.9, 7.6)  | -42.3<br>(-57.6, -22.9) |
| <b>Mali</b>                       | 240<br>(143, 374)      | 5.6<br>(3.3, 8.9)  | 233<br>(87, 430)       | 2.6<br>(1, 4.8)    | -53.3<br>(-87.5, -13.2) |
| <b>Mauritania</b>                 | 52<br>(37, 72)         | 4.8<br>(3.5, 6.7)  | 62<br>(41, 89)         | 3<br>(2, 4.3)      | -38.3<br>(-52.7, -18.3) |
| <b>Niger</b>                      | 142<br>(95, 231)       | 4.5<br>(3, 7.3)    | 207<br>(54, 376)       | 2.6<br>(0.7, 4.6)  | -42.6<br>(-81.6, -8.2)  |

|                                   |                       |                      |                        |                     |                         |
|-----------------------------------|-----------------------|----------------------|------------------------|---------------------|-------------------------|
| <b>Nigeria</b>                    | 7900<br>(3560, 12858) | 16.3<br>(7.4, 26.6)  | 9891<br>(4136, 16858)  | 10.7<br>(4.5, 18.4) | -34.6<br>(-53.4, -4.5)  |
| <b>São Tomé and Príncipe</b>      | 8<br>(5, 10)          | 11.6<br>(7.2, 15.1)  | 15<br>(11, 21)         | 13<br>(9.8, 18.6)   | 11.8<br>(-27.7, 68.3)   |
| <b>Senegal</b>                    | 123<br>(77, 180)      | 3.6<br>(2.2, 5.2)    | 202<br>(83, 320)       | 2.6<br>(1.1, 4.1)   | -26.8<br>(-56, -2.8)    |
| <b>Sierra Leone</b>               | 175<br>(113, 268)     | 8.6<br>(5.5, 13.3)   | 197<br>(80, 292)       | 5.2<br>(2, 7.8)     | -39.3<br>(-83.3, 16.8)  |
| <b>Togo</b>                       | 89<br>(64, 119)       | 6.3<br>(4.5, 8.5)    | 117<br>(38, 189)       | 3<br>(0.9, 4.7)     | -53.3<br>(-88.3, -13.7) |
| <b>Eastern sub-Saharan Africa</b> | 7581<br>(6263, 9086)  | 9.7<br>(8.1, 11.4)   | 11742<br>(8581, 14972) | 7.1<br>(5.2, 9.1)   | -26.4<br>(-47.2, -1.9)  |
| <b>Burundi</b>                    | 376<br>(234, 572)     | 16<br>(10.3, 24)     | 399<br>(121, 682)      | 8.9<br>(2.6, 15)    | -44.7<br>(-84.5, -6)    |
| <b>Comoros</b>                    | 8<br>(1, 14)          | 3.6<br>(0.5, 6.6)    | 15<br>(3, 25)          | 3.3<br>(0.7, 5.5)   | -8.6<br>(-30.6, 45.2)   |
| <b>Djibouti</b>                   | 9<br>(6, 13)          | 5.2<br>(3.5, 7.6)    | 29<br>(17, 42)         | 4.8<br>(2.9, 7.1)   | -6.9<br>(-36.4, 34.3)   |
| <b>Eritrea</b>                    | 98<br>(60, 160)       | 9.1<br>(5.9, 14.4)   | 219<br>(158, 294)      | 8.5<br>(6.3, 11.1)  | -7.6<br>(-36.3, 44.9)   |
| <b>Ethiopia</b>                   | 1743<br>(1087, 2709)  | 8.5<br>(5.5, 12.7)   | 2610<br>(2180, 3113)   | 6.4<br>(5.4, 7.7)   | -24.8<br>(-50.9, 26.1)  |
| <b>Kenya</b>                      | 1380<br>(850, 2003)   | 15.8<br>(9.8, 22.9)  | 2854<br>(1867, 3998)   | 12.8<br>(8.4, 18)   | -19.4<br>(-51.2, 6.7)   |
| <b>Madagascar</b>                 | 371<br>(254, 578)     | 6.9<br>(4.7, 10.5)   | 570<br>(403, 762)      | 5<br>(3.6, 6.7)     | -26.6<br>(-59, 17)      |
| <b>Malawi</b>                     | 412<br>(233, 554)     | 9.8<br>(6.1, 13)     | 482<br>(100, 811)      | 6.2<br>(1.3, 10.4)  | -37<br>(-88.4, 34.3)    |
| <b>Mozambique</b>                 | 339<br>(215, 473)     | 5.4<br>(3.5, 7.4)    | 438<br>(69, 753)       | 3.8<br>(0.6, 6.4)   | -29.5<br>(-89.6, 48.9)  |
| <b>Rwanda</b>                     | 523<br>(400, 645)     | 17.2<br>(13.7, 21.1) | 505<br>(311, 729)      | 8.4<br>(5.1, 12)    | -51.2<br>(-70.6, -27.5) |

|                                   |                      |                      |                      |                    |                         |
|-----------------------------------|----------------------|----------------------|----------------------|--------------------|-------------------------|
| <b>Somalia</b>                    | 184<br>(86, 325)     | 6.6<br>(3.5, 11)     | 479<br>(291, 726)    | 7.2<br>(4.5, 10.9) | 9<br>(-24.8, 72.6)      |
| <b>South Sudan</b>                | 161<br>(87, 272)     | 6.5<br>(3.8, 10.7)   | 272<br>(175, 409)    | 6.8<br>(4.5, 10)   | 4.4<br>(-28.4, 62.3)    |
| <b>Tanzania</b>                   | 934<br>(672, 1234)   | 8.2<br>(6.2, 10.8)   | 1238<br>(494, 1991)  | 5<br>(2, 8)        | -39.3<br>(-76.6, -2.6)  |
| <b>Uganda</b>                     | 619<br>(384, 892)    | 9<br>(5.6, 13)       | 991<br>(387, 1542)   | 6.8<br>(2.6, 10.6) | -24.4<br>(-59.3, 11.7)  |
| <b>Zambia</b>                     | 421<br>(309, 538)    | 13.8<br>(10.4, 17.5) | 635<br>(494, 796)    | 9.3<br>(7.3, 11.5) | -32.6<br>(-48.8, -12.6) |
| <b>Central sub-Saharan Africa</b> | 1639<br>(1182, 2221) | 6.5<br>(4.6, 8.9)    | 3408<br>(2576, 4464) | 5.8<br>(4.3, 7.8)  | -10.1<br>(-26.2, 13.8)  |
| <b>Angola</b>                     | 319<br>(172, 514)    | 7.3<br>(3.8, 11.9)   | 913<br>(650, 1288)   | 7.5<br>(5.3, 11.1) | 4<br>(-28.4, 73.8)      |
| <b>Central African Republic</b>   | 90<br>(50, 137)      | 6.6<br>(3.7, 9.7)    | 116<br>(50, 194)     | 4.5<br>(1.9, 7.6)  | -31<br>(-54.9, -6.7)    |
| <b>Congo</b>                      | 100<br>(66, 156)     | 8.4<br>(5.6, 13.1)   | 175<br>(113, 261)    | 6.3<br>(4, 9.4)    | -25.2<br>(-44.5, 5.4)   |
| <b>DR Congo</b>                   | 1052<br>(735, 1469)  | 6<br>(4.2, 8.4)      | 2101<br>(1476, 2921) | 5.3<br>(3.7, 7.4)  | -11.4<br>(-32.7, 14.9)  |
| <b>Equatorial Guinea</b>          | 13<br>(4, 22)        | 5.7<br>(1.8, 9.9)    | 26<br>(14, 42)       | 4.9<br>(2.6, 7.9)  | -14.9<br>(-46.3, 83)    |
| <b>Gabon</b>                      | 64<br>(41, 91)       | 10.8<br>(7, 15.6)    | 78<br>(50, 116)      | 6.9<br>(4.4, 10.4) | -36.1<br>(-50.3, -17.8) |

**Appendix Table 14: Number of deaths and age-standardised death rates of cirrhosis due to non-alcoholic steatohepatitis (NASH) per 100 000 in 1990 and 2017 for both sexes and the percentage change by location**

|                                  | 1990                    |                   | 2017                       |                   | Percentage change in age-standardised rates between 1990 and 2017 |
|----------------------------------|-------------------------|-------------------|----------------------------|-------------------|-------------------------------------------------------------------|
|                                  | Counts (95% UI)         | Rate (95% UI)     | Counts (95% UI)            | Rate (95% UI)     |                                                                   |
| <b>Global</b>                    | 61880<br>(55395, 67979) | 1.5<br>(1.3, 1.6) | 118030<br>(108618, 128577) | 1.5<br>(1.3, 1.6) | -1.5<br>(-9.4, 8.9)                                               |
| <b>High-income North America</b> | 3431<br>(3220, 3619)    | 1<br>(1, 1.1)     | 7234<br>(6744, 7656)       | 1.3<br>(1.2, 1.3) | 23.3<br>(18.6, 29)                                                |
| <b>Canada</b>                    | 246<br>(220, 274)       | 0.8<br>(0.7, 0.8) | 453<br>(399, 509)          | 0.7<br>(0.6, 0.8) | -7<br>(-15.2, 1.4)                                                |
| <b>Greenland</b>                 | 0<br>(0, 0)             | 0.9<br>(0.7, 1.1) | 1<br>(0, 1)                | 0.9<br>(0.6, 1)   | 1.1<br>(-30.1, 32.1)                                              |
| <b>USA</b>                       | 3185<br>(2996, 3360)    | 1.1<br>(1, 1.1)   | 6780<br>(6320, 7178)       | 1.3<br>(1.2, 1.4) | 26.2<br>(21.3, 32.5)                                              |
| <b>Australasia</b>               | 142<br>(125, 158)       | 0.6<br>(0.5, 0.7) | 291<br>(253, 335)          | 0.6<br>(0.5, 0.7) | 3.3<br>(-7.7, 16.9)                                               |
| <b>Australia</b>                 | 123<br>(107, 139)       | 0.6<br>(0.6, 0.7) | 255<br>(218, 297)          | 0.7<br>(0.6, 0.8) | 4<br>(-8.7, 19.4)                                                 |
| <b>New Zealand</b>               | 19<br>(17, 21)          | 0.5<br>(0.4, 0.5) | 36<br>(32, 40)             | 0.5<br>(0.4, 0.5) | -2<br>(-10.7, 7.5)                                                |
| <b>High-income Asia Pacific</b>  | 1689<br>(1485, 1905)    | 0.8<br>(0.7, 0.9) | 1664<br>(1459, 1888)       | 0.4<br>(0.3, 0.5) | -50.6<br>(-55.2, -46.7)                                           |
| <b>Brunei</b>                    | 1<br>(0, 1)             | 0.5<br>(0.3, 0.7) | 1<br>(1, 2)                | 0.3<br>(0.2, 0.5) | -28.5<br>(-42.9, 3.2)                                             |
| <b>Japan</b>                     | 1037<br>(938, 1137)     | 0.6<br>(0.6, 0.7) | 1165<br>(1038, 1290)       | 0.3<br>(0.3, 0.4) | -42.8<br>(-46.9, -39.7)                                           |
| <b>Singapore</b>                 | 4<br>(3, 5)             | 0.2<br>(0.1, 0.2) | 7<br>(5, 9)                | 0.1<br>(0.1, 0.1) | -41.4<br>(-48.7, -33.6)                                           |
| <b>South Korea</b>               | 648<br>(524, 772)       | 1.9<br>(1.6, 2.3) | 490<br>(383, 613)          | 0.6<br>(0.5, 0.7) | -70.5<br>(-75, -65.5)                                             |
| <b>Western Europe</b>            | 6024<br>(4441, 7856)    | 1.1<br>(0.8, 1.4) | 7035<br>(5262, 9162)       | 0.9<br>(0.6, 1.1) | -20.9<br>(-25.6, -15.6)                                           |



|                    |                      |                   |                      |                   |                         |
|--------------------|----------------------|-------------------|----------------------|-------------------|-------------------------|
| <b>Andorra</b>     | 0<br>(0, 1)          | 0.8<br>(0.5, 1.2) | 1<br>(1, 1)          | 0.7<br>(0.4, 1)   | -15.8<br>(-37.5, 14.9)  |
| <b>Austria</b>     | 175<br>(120, 242)    | 1.6<br>(1.1, 2.2) | 171<br>(117, 237)    | 1.1<br>(0.7, 1.5) | -33.9<br>(-40.8, -25.6) |
| <b>Belgium</b>     | 104<br>(84, 127)     | 0.7<br>(0.6, 0.9) | 150<br>(118, 186)    | 0.7<br>(0.6, 0.9) | 2.7<br>(-9.2, 15.1)     |
| <b>Cyprus</b>      | 7<br>(5, 11)         | 0.9<br>(0.6, 1.4) | 12<br>(8, 17)        | 0.7<br>(0.5, 0.9) | -28.8<br>(-46.5, -7.4)  |
| <b>Denmark</b>     | 57<br>(38, 79)       | 0.8<br>(0.5, 1.2) | 88<br>(59, 124)      | 0.9<br>(0.6, 1.2) | 7.1<br>(-8.3, 23.6)     |
| <b>Finland</b>     | 50<br>(34, 69)       | 0.7<br>(0.5, 1)   | 128<br>(83, 184)     | 1.3<br>(0.9, 1.9) | 82<br>(55.5, 110.2)     |
| <b>France</b>      | 935<br>(643, 1293)   | 1.2<br>(0.8, 1.7) | 949<br>(650, 1307)   | 0.8<br>(0.5, 1.1) | -34.2<br>(-42.1, -26.3) |
| <b>Germany</b>     | 1641<br>(1128, 2272) | 1.4<br>(0.9, 1.9) | 1976<br>(1354, 2756) | 1.2<br>(0.8, 1.7) | -12.2<br>(-23.7, 1.2)   |
| <b>Greece</b>      | 128<br>(87, 180)     | 0.8<br>(0.6, 1.2) | 132<br>(93, 182)     | 0.6<br>(0.4, 0.8) | -28.6<br>(-37.3, -18.5) |
| <b>Iceland</b>     | 2<br>(1, 2)          | 0.7<br>(0.5, 0.8) | 3<br>(3, 4)          | 0.7<br>(0.5, 0.8) | -2.8<br>(-14.7, 10.5)   |
| <b>Ireland</b>     | 17<br>(11, 23)       | 0.4<br>(0.3, 0.6) | 41<br>(28, 56)       | 0.6<br>(0.4, 0.8) | 40<br>(21.6, 58.7)      |
| <b>Israel</b>      | 39<br>(26, 54)       | 0.8<br>(0.6, 1.1) | 84<br>(59, 116)      | 0.7<br>(0.5, 1)   | -7.3<br>(-16.8, 5.3)    |
| <b>Italy</b>       | 896<br>(743, 1058)   | 1<br>(0.8, 1.2)   | 699<br>(573, 846)    | 0.5<br>(0.4, 0.6) | -51.2<br>(-57, -44.9)   |
| <b>Luxembourg</b>  | 8<br>(5, 11)         | 1.5<br>(1, 2.1)   | 10<br>(7, 14)        | 1.1<br>(0.7, 1.5) | -29.5<br>(-42.5, -16.6) |
| <b>Malta</b>       | 3<br>(2, 5)          | 0.8<br>(0.5, 1.1) | 5<br>(4, 7)          | 0.7<br>(0.5, 0.9) | -16.5<br>(-26, -5.4)    |
| <b>Netherlands</b> | 120<br>(85, 163)     | 0.6<br>(0.4, 0.8) | 178<br>(127, 245)    | 0.5<br>(0.4, 0.7) | -11.7<br>(-20.7, -1.5)  |

|                               |                      |                   |                      |                   |                         |
|-------------------------------|----------------------|-------------------|----------------------|-------------------|-------------------------|
| <b>Norway</b>                 | 29<br>(25, 33)       | 0.5<br>(0.4, 0.5) | 36<br>(31, 42)       | 0.4<br>(0.3, 0.5) | -16<br>(-24.7, -9.4)    |
| <b>Portugal</b>               | 280<br>(191, 390)    | 2.1<br>(1.5, 2.9) | 219<br>(151, 303)    | 1.1<br>(0.7, 1.5) | -49.2<br>(-54.9, -42.5) |
| <b>Spain</b>                  | 967<br>(675, 1338)   | 1.8<br>(1.3, 2.5) | 947<br>(662, 1276)   | 1<br>(0.7, 1.4)   | -43.3<br>(-49.3, -36.6) |
| <b>Sweden</b>                 | 73<br>(63, 84)       | 0.5<br>(0.5, 0.6) | 117<br>(99, 136)     | 0.6<br>(0.5, 0.7) | 13.1<br>(3, 24.7)       |
| <b>Switzerland</b>            | 62<br>(42, 85)       | 0.6<br>(0.4, 0.9) | 86<br>(59, 119)      | 0.5<br>(0.4, 0.7) | -16<br>(-26.9, -3)      |
| <b>UK</b>                     | 426<br>(359, 500)    | 0.5<br>(0.4, 0.6) | 997<br>(846, 1168)   | 0.9<br>(0.8, 1.1) | 79.4<br>(72.1, 92.7)    |
| <b>Southern Latin America</b> | 708<br>(595, 824)    | 1.5<br>(1.3, 1.7) | 1196<br>(998, 1406)  | 1.5<br>(1.2, 1.7) | -1.1<br>(-10.8, 9.2)    |
| <b>Argentina</b>              | 372<br>(314, 435)    | 1.1<br>(1, 1.3)   | 644<br>(534, 774)    | 1.2<br>(1, 1.5)   | 8.6<br>(-6.1, 24.9)     |
| <b>Chile</b>                  | 295<br>(242, 348)    | 2.8<br>(2.3, 3.3) | 502<br>(406, 599)    | 2.1<br>(1.7, 2.6) | -22.6<br>(-32.3, -10.9) |
| <b>Uruguay</b>                | 41<br>(35, 49)       | 1.1<br>(0.9, 1.3) | 50<br>(42, 61)       | 1<br>(0.8, 1.2)   | -10.3<br>(-22.5, 3.3)   |
| <b>Eastern Europe</b>         | 2955<br>(2729, 3183) | 1<br>(1, 1.1)     | 8646<br>(8081, 9241) | 2.8<br>(2.6, 3)   | 168.4<br>(157.5, 182.5) |
| <b>Belarus</b>                | 78<br>(68, 89)       | 0.6<br>(0.5, 0.7) | 271<br>(230, 314)    | 1.8<br>(1.5, 2.1) | 209<br>(157.3, 256.3)   |
| <b>Estonia</b>                | 13<br>(11, 15)       | 0.6<br>(0.6, 0.7) | 30<br>(25, 36)       | 1.5<br>(1.2, 1.8) | 128.2<br>(88.8, 168.9)  |
| <b>Latvia</b>                 | 24<br>(21, 27)       | 0.7<br>(0.6, 0.8) | 48<br>(41, 56)       | 1.5<br>(1.3, 1.8) | 127.2<br>(90.4, 163.5)  |
| <b>Lithuania</b>              | 32<br>(28, 36)       | 0.7<br>(0.6, 0.8) | 99<br>(86, 112)      | 2.2<br>(1.9, 2.5) | 213.6<br>(184.3, 247.6) |
| <b>Moldova</b>                | 320<br>(283, 360)    | 6.7<br>(6, 7.5)   | 364<br>(314, 418)    | 6.5<br>(5.6, 7.4) | -3.8<br>(-12.1, 4.5)    |

|                               |                      |                   |                      |                   |                         |
|-------------------------------|----------------------|-------------------|----------------------|-------------------|-------------------------|
| <b>Russia</b>                 | 1692<br>(1517, 1828) | 0.9<br>(0.8, 1)   | 5708<br>(5354, 6056) | 2.7<br>(2.5, 2.8) | 189.3<br>(173.8, 220.3) |
| <b>Ukraine</b>                | 796<br>(740, 860)    | 1.1<br>(1, 1.2)   | 2127<br>(1911, 2340) | 3.3<br>(2.9, 3.6) | 193.9<br>(162.9, 222.6) |
| <b>Central Europe</b>         | 1791<br>(1619, 1987) | 1.2<br>(1.1, 1.3) | 2239<br>(2007, 2482) | 1.2<br>(1, 1.3)   | -2<br>(-6.6, 3.1)       |
| <b>Albania</b>                | 14<br>(12, 16)       | 0.7<br>(0.5, 0.7) | 22<br>(17, 30)       | 0.5<br>(0.4, 0.7) | -17.2<br>(-37.1, 23.6)  |
| <b>Bosnia and Herzegovina</b> | 46<br>(41, 54)       | 1<br>(0.9, 1.2)   | 47<br>(38, 67)       | 0.8<br>(0.7, 1.1) | -22.3<br>(-34.5, 4)     |
| <b>Bulgaria</b>               | 114<br>(101, 128)    | 0.9<br>(0.8, 1)   | 140<br>(122, 158)    | 1.1<br>(1, 1.3)   | 24.5<br>(10.9, 38.9)    |
| <b>Croatia</b>                | 108<br>(96, 121)     | 1.6<br>(1.4, 1.8) | 79<br>(69, 90)       | 1<br>(0.9, 1.1)   | -38.4<br>(-44.4, -32.3) |
| <b>Czech Republic</b>         | 125<br>(112, 140)    | 0.9<br>(0.8, 1)   | 151<br>(132, 170)    | 0.8<br>(0.7, 0.9) | -10.9<br>(-20.9, -0.4)  |
| <b>Hungary</b>                | 375<br>(334, 419)    | 2.7<br>(2.4, 3)   | 233<br>(203, 263)    | 1.4<br>(1.2, 1.6) | -48.2<br>(-53.2, -42.9) |
| <b>Montenegro</b>             | 2<br>(2, 3)          | 0.4<br>(0.3, 0.4) | 4<br>(3, 4)          | 0.4<br>(0.3, 0.5) | 2.6<br>(-17.9, 23.2)    |
| <b>North Macedonia</b>        | 10<br>(8, 12)        | 0.5<br>(0.4, 0.6) | 20<br>(16, 23)       | 0.6<br>(0.5, 0.7) | 16.9<br>(-6.3, 38)      |
| <b>Poland</b>                 | 276<br>(248, 310)    | 0.6<br>(0.6, 0.7) | 552<br>(485, 631)    | 0.9<br>(0.8, 1)   | 46.3<br>(28.7, 63.9)    |
| <b>Romania</b>                | 477<br>(425, 531)    | 1.6<br>(1.5, 1.8) | 743<br>(654, 845)    | 2.2<br>(1.9, 2.5) | 34.5<br>(23.1, 46.8)    |
| <b>Serbia</b>                 | 99<br>(77, 122)      | 0.8<br>(0.6, 1)   | 98<br>(84, 116)      | 0.7<br>(0.6, 0.8) | -17.9<br>(-33.4, 4.1)   |
| <b>Slovakia</b>               | 97<br>(83, 123)      | 1.6<br>(1.4, 2.1) | 109<br>(86, 126)     | 1.3<br>(1, 1.5)   | -23.1<br>(-45.3, -5.7)  |
| <b>Slovenia</b>               | 48<br>(43, 54)       | 1.9<br>(1.7, 2.1) | 42<br>(37, 48)       | 1.1<br>(1, 1.3)   | -41.2<br>(-47.4, -34.7) |

|                                  |                      |                   |                       |                   |                        |
|----------------------------------|----------------------|-------------------|-----------------------|-------------------|------------------------|
| <b>Central Asia</b>              | 877<br>(783, 970)    | 1.8<br>(1.6, 2)   | 2502<br>(2187, 2825)  | 3.2<br>(2.8, 3.6) | 78.4<br>(63.4, 90.7)   |
| <b>Armenia</b>                   | 29<br>(25, 32)       | 1<br>(0.9, 1.2)   | 91<br>(80, 103)       | 2.2<br>(2, 2.5)   | 118.6<br>(97, 142.8)   |
| <b>Azerbaijan</b>                | 98<br>(83, 110)      | 1.9<br>(1.6, 2.1) | 276<br>(219, 336)     | 3.1<br>(2.4, 3.9) | 66.5<br>(40, 106.9)    |
| <b>Georgia</b>                   | 105<br>(92, 117)     | 1.6<br>(1.5, 1.8) | 113<br>(96, 131)      | 2.1<br>(1.8, 2.4) | 25.1<br>(12.1, 41.9)   |
| <b>Kazakhstan</b>                | 156<br>(138, 176)    | 1.2<br>(1, 1.3)   | 551<br>(435, 653)     | 3.1<br>(2.5, 3.6) | 164.5<br>(118, 203.7)  |
| <b>Kyrgyzstan</b>                | 71<br>(63, 80)       | 2.3<br>(2, 2.6)   | 165<br>(138, 190)     | 3.3<br>(2.8, 3.8) | 45.7<br>(27.7, 61.2)   |
| <b>Mongolia</b>                  | 44<br>(37, 53)       | 4<br>(3.5, 4.7)   | 105<br>(88, 123)      | 4.8<br>(3.8, 5.7) | 19.3<br>(-10.8, 41.6)  |
| <b>Tajikistan</b>                | 46<br>(40, 59)       | 1.5<br>(1.3, 2)   | 107<br>(90, 127)      | 1.8<br>(1.5, 2.2) | 17.7<br>(3.5, 33.7)    |
| <b>Turkmenistan</b>              | 54<br>(47, 60)       | 2.6<br>(2.3, 2.9) | 189<br>(163, 216)     | 4.2<br>(3.7, 4.8) | 63.8<br>(46.8, 83.8)   |
| <b>Uzbekistan</b>                | 275<br>(244, 307)    | 2.2<br>(2, 2.5)   | 904<br>(762, 1062)    | 3.6<br>(3.1, 4.2) | 61.5<br>(41.8, 82)     |
| <b>Central Latin<br/>America</b> | 4000<br>(3757, 4237) | 4.4<br>(4.1, 4.6) | 9517<br>(8875, 10143) | 4<br>(3.8, 4.3)   | -7.8<br>(-12.3, -3)    |
| <b>Colombia</b>                  | 222<br>(201, 245)    | 1.2<br>(1.1, 1.4) | 569<br>(490, 655)     | 1.1<br>(0.9, 1.2) | -15.9<br>(-25.9, -3.7) |
| <b>Costa Rica</b>                | 39<br>(36, 43)       | 2.2<br>(2, 2.4)   | 136<br>(118, 156)     | 2.7<br>(2.4, 3.1) | 26.8<br>(12.9, 43.9)   |
| <b>El Salvador</b>               | 114<br>(97, 126)     | 3.6<br>(3.1, 4)   | 249<br>(200, 325)     | 4.4<br>(3.5, 5.7) | 21.2<br>(-3.8, 66.6)   |
| <b>Guatemala</b>                 | 239<br>(214, 264)    | 5.7<br>(5.1, 6.2) | 707<br>(619, 807)     | 6.3<br>(5.5, 7.1) | 10.8<br>(-2.6, 26.4)   |
| <b>Honduras</b>                  | 115<br>(93, 158)     | 5.1<br>(4.2, 6.8) | 394<br>(289, 549)     | 6.4<br>(4.7, 8.9) | 25.9<br>(-3.4, 58.9)   |

|                             |                      |                   |                      |                   |                         |
|-----------------------------|----------------------|-------------------|----------------------|-------------------|-------------------------|
| <b>Mexico</b>               | 2915<br>(2746, 3072) | 6.1<br>(5.8, 6.5) | 6547<br>(6119, 6934) | 5.6<br>(5.2, 5.9) | -8.9<br>(-13.1, -4.7)   |
| <b>Nicaragua</b>            | 56<br>(48, 63)       | 3.3<br>(2.9, 3.7) | 204<br>(145, 238)    | 4.3<br>(3.1, 5.1) | 31.8<br>(-0.4, 53.8)    |
| <b>Panama</b>               | 24<br>(21, 26)       | 1.6<br>(1.4, 1.8) | 64<br>(57, 71)       | 1.6<br>(1.4, 1.8) | 0.9<br>(-9.7, 12.2)     |
| <b>Venezuela</b>            | 276<br>(250, 305)    | 2.7<br>(2.4, 3)   | 647<br>(544, 778)    | 2.2<br>(1.9, 2.7) | -16.6<br>(-29.6, -0.5)  |
| <b>Andean Latin America</b> | 948<br>(837, 1098)   | 4.4<br>(3.9, 5.1) | 2489<br>(2167, 2814) | 4.6<br>(4, 5.2)   | 5<br>(-8.8, 18.5)       |
| <b>Bolivia</b>              | 180<br>(128, 244)    | 5.5<br>(3.9, 7.3) | 497<br>(385, 634)    | 5.8<br>(4.6, 7.5) | 6.7<br>(-17.1, 42.9)    |
| <b>Ecuador</b>              | 274<br>(247, 301)    | 4.8<br>(4.4, 5.3) | 871<br>(750, 986)    | 6<br>(5.1, 6.7)   | 23.2<br>(10.2, 39)      |
| <b>Peru</b>                 | 494<br>(424, 576)    | 3.9<br>(3.4, 4.6) | 1122<br>(917, 1336)  | 3.7<br>(3, 4.4)   | -6.4<br>(-23.9, 13.3)   |
| <b>Caribbean</b>            | 861<br>(754, 974)    | 3.2<br>(2.8, 3.7) | 1395<br>(1204, 1668) | 2.7<br>(2.4, 3.3) | -15.8<br>(-23.9, 4.1)   |
| <b>Antigua and Barbuda</b>  | 2<br>(1, 2)          | 3.1<br>(2.7, 3.4) | 2<br>(2, 3)          | 2.4<br>(2.1, 2.8) | -21<br>(-30.2, -9.3)    |
| <b>The Bahamas</b>          | 6<br>(5, 7)          | 3.7<br>(3.3, 4.2) | 10<br>(9, 12)        | 2.6<br>(2.3, 3)   | -28.8<br>(-37.6, -19.2) |
| <b>Barbados</b>             | 7<br>(6, 7)          | 2.4<br>(2.1, 2.7) | 8<br>(7, 10)         | 1.8<br>(1.6, 2)   | -25.6<br>(-34.7, -15.4) |
| <b>Belize</b>               | 4<br>(3, 4)          | 3.7<br>(3.2, 4.2) | 12<br>(10, 13)       | 4.3<br>(3.7, 4.9) | 16.5<br>(4.5, 30.1)     |
| <b>Bermuda</b>              | 2<br>(1, 2)          | 2.5<br>(2.2, 2.8) | 2<br>(1, 2)          | 1.2<br>(1.1, 1.5) | -50<br>(-57.3, -38.9)   |
| <b>Cuba</b>                 | 197<br>(175, 222)    | 1.9<br>(1.7, 2.1) | 387<br>(325, 459)    | 2.1<br>(1.8, 2.5) | 11.8<br>(-2.3, 26.1)    |
| <b>Dominica</b>             | 2<br>(1, 2)          | 2.3<br>(2.1, 2.6) | 2<br>(2, 2)          | 2.2<br>(1.9, 2.5) | -7<br>(-18.4, 5)        |

|                                             |                      |                   |                         |                   |                         |
|---------------------------------------------|----------------------|-------------------|-------------------------|-------------------|-------------------------|
| <b>Dominican Republic</b>                   | 201<br>(131, 238)    | 5.2<br>(3.3, 6.2) | 290<br>(220, 479)       | 3.2<br>(2.4, 5.2) | -39.2<br>(-56, 40)      |
| <b>Grenada</b>                              | 2<br>(2, 3)          | 3.4<br>(3, 3.8)   | 4<br>(3, 4)             | 2.6<br>(2.2, 2.9) | -24<br>(-32.1, -15)     |
| <b>Guyana</b>                               | 25<br>(22, 28)       | 5.8<br>(5.2, 6.5) | 34<br>(28, 40)          | 5.1<br>(4.3, 6.1) | -11.9<br>(-24, 2.2)     |
| <b>Haiti</b>                                | 138<br>(93, 204)     | 4<br>(2.7, 6.1)   | 263<br>(188, 390)       | 3.8<br>(2.7, 5.7) | -5.2<br>(-25.8, 24.4)   |
| <b>Jamaica</b>                              | 26<br>(22, 29)       | 1.5<br>(1.3, 1.7) | 39<br>(31, 51)          | 1.3<br>(1.1, 1.7) | -9.1<br>(-27.5, 23.5)   |
| <b>Puerto Rico</b>                          | 176<br>(156, 196)    | 4.8<br>(4.3, 5.3) | 209<br>(186, 233)       | 3.2<br>(2.8, 3.6) | -33.4<br>(-39.9, -25.9) |
| <b>Saint Lucia</b>                          | 4<br>(3, 4)          | 4.2<br>(3.7, 4.7) | 6<br>(5, 7)             | 2.8<br>(2.5, 3.2) | -32.5<br>(-40, -23.7)   |
| <b>Saint Vincent and<br/>the Grenadines</b> | 2<br>(2, 2)          | 2.9<br>(2.6, 3.3) | 4<br>(4, 5)             | 3<br>(2.7, 3.5)   | 3.5<br>(-10.1, 20.1)    |
| <b>Suriname</b>                             | 11<br>(10, 13)       | 4.2<br>(3.7, 4.8) | 24<br>(21, 28)          | 4.1<br>(3.5, 4.7) | -2.5<br>(-15.8, 12)     |
| <b>Trinidad and<br/>Tobago</b>              | 26<br>(23, 29)       | 3<br>(2.6, 3.3)   | 40<br>(32, 51)          | 2.2<br>(1.8, 2.8) | -25<br>(-39.8, -7.8)    |
| <b>Virgin Islands</b>                       | 4<br>(3, 4)          | 4<br>(3.5, 4.7)   | 7<br>(5, 8)             | 3.6<br>(2.9, 4.2) | -11.2<br>(-27.7, 5.3)   |
| <b>Tropical Latin<br/>America</b>           | 3700<br>(3492, 3907) | 3.7<br>(3.5, 3.9) | 8350<br>(7874, 8783)    | 3.5<br>(3.3, 3.7) | -5.5<br>(-9.4, -1.7)    |
| <b>Brazil</b>                               | 3650<br>(3441, 3851) | 3.7<br>(3.5, 3.9) | 8213<br>(7750, 8640)    | 3.5<br>(3.3, 3.7) | -5.8<br>(-9.5, -2)      |
| <b>Paraguay</b>                             | 51<br>(41, 68)       | 2.2<br>(1.8, 2.9) | 137<br>(108, 207)       | 2.5<br>(2, 3.8)   | 13.3<br>(-10.9, 44.4)   |
| <b>East Asia</b>                            | 8216<br>(6724, 9069) | 0.9<br>(0.7, 0.9) | 11622<br>(10408, 15004) | 0.6<br>(0.5, 0.7) | -34.3<br>(-43, -7.7)    |
| <b>China</b>                                | 7668<br>(6236, 8464) | 0.8<br>(0.7, 0.9) | 10725<br>(9566, 13996)  | 0.5<br>(0.5, 0.7) | -35.2<br>(-44.3, -7.2)  |

|                                   |                      |                    |                         |                    |                         |
|-----------------------------------|----------------------|--------------------|-------------------------|--------------------|-------------------------|
| <b>North Korea</b>                | 131<br>(100, 168)    | 0.7<br>(0.6, 0.9)  | 242<br>(177, 330)       | 0.8<br>(0.6, 1)    | 3.8<br>(-22.8, 36.4)    |
| <b>Taiwan (province of China)</b> | 280<br>(249, 311)    | 1.7<br>(1.6, 1.9)  | 468<br>(409, 531)       | 1.2<br>(1.1, 1.4)  | -28.5<br>(-34.7, -21)   |
| <b>Southeast Asia</b>             | 8816<br>(7621, 9880) | 3.3<br>(2.8, 3.7)  | 17454<br>(15681, 19403) | 3<br>(2.7, 3.3)    | -9.1<br>(-19.8, 2.2)    |
| <b>Cambodia</b>                   | 380<br>(289, 495)    | 8.3<br>(6.3, 10.7) | 935<br>(753, 1172)      | 8.6<br>(6.9, 10.9) | 4.2<br>(-22.3, 38.7)    |
| <b>Indonesia</b>                  | 4710<br>(4051, 5220) | 4.8<br>(4, 5.3)    | 8260<br>(7516, 9291)    | 4.2<br>(3.9, 4.8)  | -10.7<br>(-20.9, 4.2)   |
| <b>Laos</b>                       | 65<br>(47, 88)       | 3<br>(2.2, 4.1)    | 141<br>(98, 193)        | 3.3<br>(2.3, 4.5)  | 10.2<br>(-25.8, 60.9)   |
| <b>Malaysia</b>                   | 135<br>(105, 159)    | 1.4<br>(1.1, 1.7)  | 394<br>(299, 504)       | 1.6<br>(1.2, 2.1)  | 10.5<br>(-12.2, 34.6)   |
| <b>Maldives</b>                   | 1<br>(1, 1)          | 1<br>(0.6, 1.3)    | 2<br>(2, 3)             | 0.8<br>(0.6, 1)    | -16<br>(-42.8, 33.4)    |
| <b>Mauritius</b>                  | 19<br>(16, 21)       | 2.4<br>(2, 2.7)    | 27<br>(23, 32)          | 1.6<br>(1.4, 1.9)  | -31.2<br>(-38.2, -23)   |
| <b>Myanmar</b>                    | 1114<br>(800, 1435)  | 4.3<br>(3.1, 5.6)  | 1935<br>(1569, 2331)    | 4<br>(3.3, 4.8)    | -6.8<br>(-28.3, 29.6)   |
| <b>Philippines</b>                | 253<br>(214, 297)    | 0.8<br>(0.7, 0.9)  | 1152<br>(937, 1391)     | 1.6<br>(1.3, 2)    | 112.7<br>(81, 148.4)    |
| <b>Sri Lanka</b>                  | 237<br>(196, 279)    | 2.1<br>(1.7, 2.4)  | 368<br>(285, 461)       | 1.5<br>(1.2, 1.9)  | -25.8<br>(-39.4, -10.9) |
| <b>Seychelles</b>                 | 1<br>(1, 2)          | 2.4<br>(2, 2.9)    | 4<br>(3, 4)             | 3.4<br>(2.8, 3.9)  | 41.5<br>(21.8, 66.9)    |
| <b>Thailand</b>                   | 1005<br>(803, 1198)  | 2.6<br>(2, 3.1)    | 2385<br>(1850, 2860)    | 2.4<br>(1.9, 2.9)  | -7.5<br>(-23.8, 9.6)    |
| <b>East Timor</b>                 | 6<br>(4, 9)          | 2<br>(1.3, 2.8)    | 20<br>(13, 28)          | 2.6<br>(1.6, 3.5)  | 32.1<br>(-4.3, 87.2)    |
| <b>Vietnam</b>                    | 878<br>(663, 1143)   | 2.2<br>(1.7, 2.9)  | 1806<br>(1425, 2289)    | 2<br>(1.6, 2.5)    | -10.2<br>(-35.4, 28.3)  |

|                                           |                      |                   |                       |                   |                        |
|-------------------------------------------|----------------------|-------------------|-----------------------|-------------------|------------------------|
| <b>Oceania</b>                            | 59<br>(50, 69)       | 1.8<br>(1.5, 2.1) | 130<br>(109, 156)     | 1.8<br>(1.5, 2.1) | -0.3<br>(-15.1, 16.3)  |
| <b>American Samoa</b>                     | 1<br>(0, 1)          | 2.1<br>(1.7, 2.7) | 1<br>(1, 1)           | 2.3<br>(1.9, 2.6) | 5.4<br>(-17.7, 32.7)   |
| <b>Federated States of<br/>Micronesia</b> | 1<br>(1, 2)          | 2.5<br>(1.9, 3.8) | 2<br>(1, 2)           | 2.2<br>(1.5, 3.2) | -10.8<br>(-32.9, 20.7) |
| <b>Fiji</b>                               | 3<br>(2, 4)          | 0.8<br>(0.6, 0.9) | 7<br>(6, 9)           | 1<br>(0.8, 1.2)   | 29.2<br>(1.9, 65.3)    |
| <b>Guam</b>                               | 2<br>(1, 2)          | 2.2<br>(1.7, 2.6) | 4<br>(3, 5)           | 2.2<br>(1.9, 2.6) | 2.2<br>(-17.3, 30.7)   |
| <b>Kiribati</b>                           | 1<br>(1, 1)          | 2.6<br>(1.8, 3.8) | 2<br>(1, 3)           | 2.9<br>(1.9, 4.6) | 13.9<br>(-9.4, 40.8)   |
| <b>Marshall Islands</b>                   | 0<br>(0, 1)          | 2.8<br>(2, 3.6)   | 1<br>(1, 1)           | 2.9<br>(1.9, 3.9) | 1.9<br>(-19.2, 26.2)   |
| <b>Northern Mariana<br/>Islands</b>       | 0<br>(0, 1)          | 2.3<br>(1.8, 2.8) | 1<br>(1, 1)           | 1.9<br>(1.6, 2.2) | -14.7<br>(-33.1, 5.8)  |
| <b>Papua New Guinea</b>                   | 38<br>(31, 47)       | 1.7<br>(1.4, 2)   | 88<br>(68, 111)       | 1.6<br>(1.3, 2)   | -4.3<br>(-23.9, 18.6)  |
| <b>Samoa</b>                              | 2<br>(1, 3)          | 2.1<br>(1.5, 3.4) | 3<br>(2, 4)           | 2.2<br>(1.6, 3.1) | 2.8<br>(-17.3, 28)     |
| <b>Solomon Islands</b>                    | 3<br>(2, 4)          | 1.8<br>(1.4, 2.2) | 7<br>(5, 8)           | 1.9<br>(1.5, 2.2) | 5.7<br>(-14.5, 30.9)   |
| <b>Tonga</b>                              | 2<br>(1, 2)          | 3<br>(2.5, 3.6)   | 3<br>(2, 3)           | 3.6<br>(2.9, 4.3) | 19<br>(-3.8, 46.2)     |
| <b>Vanuatu</b>                            | 2<br>(1, 3)          | 2.7<br>(1.3, 4.5) | 5<br>(2, 9)           | 2.8<br>(1.3, 5.1) | 3.1<br>(-22.1, 37.3)   |
| <b>North Africa and<br/>Middle East</b>   | 4444<br>(2996, 5419) | 2.8<br>(1.8, 3.5) | 9983<br>(7572, 12362) | 2.5<br>(1.9, 3.1) | -9.6<br>(-29.7, 11.3)  |
| <b>Afghanistan</b>                        | 130<br>(64, 202)     | 1.9<br>(1, 3)     | 200<br>(123, 289)     | 1.9<br>(1.2, 2.9) | 1.5<br>(-20.5, 68)     |
| <b>Algeria</b>                            | 141<br>(90, 216)     | 1.2<br>(0.8, 1.9) | 375<br>(275, 501)     | 1.2<br>(0.9, 1.6) | -0.1<br>(-23.3, 34.3)  |



|                     |                      |                   |                      |                     |                         |
|---------------------|----------------------|-------------------|----------------------|---------------------|-------------------------|
| <b>Bahrain</b>      | 4<br>(3, 5)          | 2.3<br>(1.8, 2.9) | 13<br>(10, 16)       | 1.4<br>(1.1, 1.8)   | -38<br>(-48.6, -24.6)   |
| <b>Egypt</b>        | 2599<br>(1540, 3173) | 12<br>(6.3, 15)   | 5715<br>(3824, 7748) | 13.4<br>(7.7, 18.1) | 12.2<br>(-17.2, 42.5)   |
| <b>Iran</b>         | 243<br>(204, 284)    | 1<br>(0.8, 1.2)   | 747<br>(673, 809)    | 1.1<br>(1, 1.2)     | 15.3<br>(-5.2, 37.8)    |
| <b>Iraq</b>         | 105<br>(81, 140)     | 1.3<br>(1, 1.8)   | 142<br>(118, 171)    | 0.6<br>(0.5, 0.7)   | -54.6<br>(-62.8, -43.2) |
| <b>Jordan</b>       | 21<br>(16, 27)       | 1.5<br>(1.1, 2)   | 69<br>(53, 86)       | 1.3<br>(1, 1.6)     | -14<br>(-34.8, 17.3)    |
| <b>Kuwait</b>       | 6<br>(5, 8)          | 0.9<br>(0.7, 1)   | 28<br>(22, 34)       | 1.1<br>(0.9, 1.3)   | 24.5<br>(-0.7, 45.1)    |
| <b>Lebanon</b>      | 29<br>(22, 36)       | 1.4<br>(1, 1.7)   | 70<br>(47, 92)       | 1.2<br>(0.8, 1.6)   | -9.8<br>(-44.1, 22.7)   |
| <b>Libya</b>        | 36<br>(25, 51)       | 1.9<br>(1.3, 2.7) | 94<br>(63, 126)      | 2.2<br>(1.5, 2.9)   | 13.2<br>(-19.2, 77)     |
| <b>Morocco</b>      | 184<br>(132, 260)    | 1.3<br>(0.9, 1.9) | 427<br>(329, 547)    | 1.4<br>(1.1, 1.8)   | 8.4<br>(-22, 51.3)      |
| <b>Palestine</b>    | 11<br>(8, 15)        | 1.3<br>(0.9, 1.7) | 29<br>(24, 35)       | 1.3<br>(1, 1.6)     | -2.6<br>(-23.4, 33.1)   |
| <b>Oman</b>         | 8<br>(6, 11)         | 1.1<br>(0.8, 1.6) | 27<br>(19, 35)       | 1.4<br>(1, 1.8)     | 19.5<br>(-14.1, 57.1)   |
| <b>Qatar</b>        | 4<br>(3, 5)          | 3.5<br>(2.6, 4.4) | 19<br>(14, 25)       | 2.3<br>(1.7, 3)     | -32.4<br>(-47.6, -12.5) |
| <b>Saudi Arabia</b> | 168<br>(66, 238)     | 2.9<br>(1.1, 4.2) | 402<br>(247, 537)    | 3<br>(1.6, 4)       | 3.6<br>(-29.1, 68.1)    |
| <b>Sudan</b>        | 184<br>(100, 305)    | 2.1<br>(1, 3.6)   | 334<br>(196, 506)    | 2<br>(1.1, 3.1)     | -6.4<br>(-33.6, 38.3)   |
| <b>Syria</b>        | 81<br>(65, 100)      | 1.5<br>(1.2, 1.9) | 204<br>(160, 256)    | 1.7<br>(1.3, 2.1)   | 7.8<br>(-14.6, 35.6)    |
| <b>Tunisia</b>      | 60<br>(40, 84)       | 1.3<br>(0.9, 1.8) | 149<br>(109, 198)    | 1.3<br>(1, 1.7)     | 0.8<br>(-31.2, 42.8)    |

|                                    |                      |                   |                         |                   |                        |
|------------------------------------|----------------------|-------------------|-------------------------|-------------------|------------------------|
| <b>Turkey</b>                      | 340<br>(235, 479)    | 1<br>(0.7, 1.4)   | 709<br>(584, 840)       | 0.8<br>(0.7, 1)   | -16.2<br>(-42.9, 21)   |
| <b>United Arab Emirates</b>        | 8<br>(3, 13)         | 1.7<br>(0.7, 2.7) | 62<br>(29, 86)          | 1.7<br>(0.7, 2.4) | -4.7<br>(-36, 48.5)    |
| <b>Yemen</b>                       | 78<br>(39, 130)      | 1.6<br>(0.8, 2.8) | 160<br>(108, 237)       | 1.3<br>(0.9, 2)   | -19<br>(-48.3, 41)     |
| <b>South Asia</b>                  | 6965<br>(6210, 7857) | 1.1<br>(1, 1.2)   | 15939<br>(13946, 20628) | 1.2<br>(1, 1.5)   | 5.7<br>(-7.3, 29.3)    |
| <b>Bangladesh</b>                  | 832<br>(554, 1019)   | 1.5<br>(1, 1.8)   | 1478<br>(1204, 1869)    | 1.2<br>(1, 1.5)   | -19.4<br>(-36.2, 26.2) |
| <b>Bhutan</b>                      | 5<br>(4, 6)          | 1.8<br>(1.3, 2.2) | 9<br>(6, 13)            | 1.5<br>(1, 2)     | -16.7<br>(-39.7, 13.2) |
| <b>India</b>                       | 4762<br>(4094, 6141) | 0.9<br>(0.8, 1.2) | 11290<br>(9675, 15901)  | 1<br>(0.9, 1.5)   | 10.7<br>(-3.8, 30)     |
| <b>Nepal</b>                       | 118<br>(87, 156)     | 1.1<br>(0.8, 1.5) | 283<br>(208, 367)       | 1.3<br>(1, 1.7)   | 17<br>(-14, 55.2)      |
| <b>Pakistan</b>                    | 1249<br>(755, 1702)  | 2.1<br>(1.3, 2.9) | 2879<br>(2002, 3763)    | 2.6<br>(1.8, 3.4) | 20.8<br>(-6.7, 59.8)   |
| <b>Southern sub-Saharan Africa</b> | 431<br>(336, 499)    | 1.4<br>(1.1, 1.7) | 642<br>(555, 734)       | 1.1<br>(1, 1.3)   | -22.4<br>(-37.5, 0.1)  |
| <b>Botswana</b>                    | 7<br>(5, 10)         | 1.1<br>(0.7, 1.6) | 16<br>(12, 22)          | 1.1<br>(0.8, 1.5) | -2.7<br>(-27.7, 31.7)  |
| <b>eSwatini</b>                    | 7<br>(5, 10)         | 2.2<br>(1.6, 3.1) | 11<br>(8, 15)           | 1.8<br>(1.3, 2.4) | -19.4<br>(-43.6, 12.6) |
| <b>Lesotho</b>                     | 11<br>(5, 18)        | 1.1<br>(0.5, 1.7) | 17<br>(8, 25)           | 1.3<br>(0.6, 2)   | 20.4<br>(-19.4, 88.4)  |
| <b>Namibia</b>                     | 5<br>(3, 8)          | 0.7<br>(0.4, 1.1) | 14<br>(9, 22)           | 1<br>(0.6, 1.5)   | 30.3<br>(-17.5, 99.3)  |
| <b>South Africa</b>                | 336<br>(258, 399)    | 1.5<br>(1.1, 1.8) | 486<br>(428, 552)       | 1.1<br>(0.9, 1.2) | -27.3<br>(-37.8, -4.6) |
| <b>Zimbabwe</b>                    | 64<br>(50, 77)       | 1.5<br>(1.2, 1.8) | 98<br>(31, 171)         | 1.4<br>(0.4, 2.4) | -5.7<br>(-71.7, 66.4)  |

|                                   |                      |                   |                      |                   |                        |
|-----------------------------------|----------------------|-------------------|----------------------|-------------------|------------------------|
| <b>Western sub-Saharan Africa</b> | 2866<br>(1751, 4193) | 3.1<br>(1.9, 4.5) | 4505<br>(2966, 6224) | 2.3<br>(1.5, 3.2) | -23.9<br>(-43.4, 1.6)  |
| <b>Benin</b>                      | 46<br>(31, 68)       | 2.2<br>(1.5, 3.3) | 89<br>(62, 121)      | 1.8<br>(1.2, 2.5) | -17.7<br>(-56.4, 26)   |
| <b>Burkina Faso</b>               | 87<br>(70, 105)      | 2<br>(1.6, 2.4)   | 125<br>(9, 223)      | 1.4<br>(0.1, 2.5) | -29.8<br>(-95.1, 32.2) |
| <b>Cameroon</b>                   | 165<br>(127, 204)    | 3.5<br>(2.6, 4.2) | 322<br>(146, 486)    | 2.6<br>(1.2, 4)   | -24.5<br>(-59.4, 7.4)  |
| <b>Cape Verde</b>                 | 2<br>(2, 3)          | 1<br>(0.7, 1.2)   | 7<br>(6, 8)          | 1.4<br>(1.2, 1.7) | 51<br>(15, 100.7)      |
| <b>Chad</b>                       | 49<br>(31, 69)       | 1.7<br>(1.1, 2.4) | 102<br>(75, 136)     | 1.7<br>(1.3, 2.3) | 3.8<br>(-22.4, 49.1)   |
| <b>Côte d'Ivoire</b>              | 99<br>(71, 135)      | 2.2<br>(1.6, 3)   | 219<br>(161, 291)    | 1.9<br>(1.4, 2.6) | -11.1<br>(-41.2, 20)   |
| <b>The Gambia</b>                 | 7<br>(4, 10)         | 1.8<br>(1.1, 2.7) | 19<br>(13, 24)       | 1.9<br>(1.4, 2.5) | 5.3<br>(-27.3, 59.4)   |
| <b>Ghana</b>                      | 154<br>(121, 194)    | 2.3<br>(1.8, 2.9) | 302<br>(104, 526)    | 1.9<br>(0.6, 3.2) | -17.7<br>(-75.2, 39.1) |
| <b>Guinea</b>                     | 70<br>(42, 121)      | 2<br>(1.2, 3.6)   | 96<br>(61, 152)      | 1.7<br>(1.1, 2.8) | -14.8<br>(-37.1, 30)   |
| <b>Guinea-Bissau</b>              | 11<br>(7, 15)        | 2.6<br>(1.7, 3.5) | 19<br>(14, 26)       | 2.5<br>(1.9, 3.4) | -4.2<br>(-28.7, 35.3)  |
| <b>Liberia</b>                    | 38<br>(26, 51)       | 3.3<br>(2.3, 4.5) | 49<br>(36, 66)       | 2.4<br>(1.7, 3.2) | -26.8<br>(-44.8, -4.9) |
| <b>Mali</b>                       | 90<br>(58, 146)      | 2.2<br>(1.4, 3.5) | 102<br>(35, 177)     | 1.2<br>(0.4, 2)   | -46.1<br>(-86.1, -5.6) |
| <b>Mauritania</b>                 | 24<br>(18, 34)       | 2.3<br>(1.7, 3.2) | 35<br>(25, 49)       | 1.7<br>(1.2, 2.4) | -25.1<br>(-42.4, -4.3) |
| <b>Niger</b>                      | 47<br>(32, 76)       | 1.5<br>(1, 2.5)   | 76<br>(19, 133)      | 1<br>(0.2, 1.7)   | -36.2<br>(-79.4, -2.9) |
| <b>Nigeria</b>                    | 1841<br>(848, 3017)  | 3.9<br>(1.8, 6.4) | 2734<br>(1143, 4594) | 3.1<br>(1.3, 5.2) | -22.1<br>(-45.2, 12.6) |

|                                   |                      |                   |                      |                   |                         |
|-----------------------------------|----------------------|-------------------|----------------------|-------------------|-------------------------|
| <b>São Tomé and Príncipe</b>      | 3<br>(2, 4)          | 4.1<br>(2.6, 5.3) | 5<br>(4, 8)          | 5<br>(3.7, 6.8)   | 20.1<br>(-22.7, 83.3)   |
| <b>Senegal</b>                    | 50<br>(30, 73)       | 1.5<br>(0.9, 2.1) | 91<br>(35, 138)      | 1.2<br>(0.5, 1.8) | -18.4<br>(-52.4, 7)     |
| <b>Sierra Leone</b>               | 54<br>(36, 80)       | 2.7<br>(1.8, 4)   | 67<br>(26, 102)      | 1.8<br>(0.7, 2.7) | -31.8<br>(-82.3, 30.7)  |
| <b>Togo</b>                       | 29<br>(22, 39)       | 2.2<br>(1.6, 2.9) | 46<br>(15, 72)       | 1.2<br>(0.4, 1.9) | -43.1<br>(-85.3, 1)     |
| <b>Eastern sub-Saharan Africa</b> | 2432<br>(2037, 2909) | 3.2<br>(2.7, 3.8) | 4047<br>(2969, 5144) | 2.5<br>(1.8, 3.2) | -20<br>(-42.3, 5)       |
| <b>Burundi</b>                    | 101<br>(64, 153)     | 4.5<br>(2.9, 6.6) | 111<br>(33, 185)     | 2.6<br>(0.7, 4.3) | -42.3<br>(-84, -6.4)    |
| <b>Comoros</b>                    | 3<br>(0, 6)          | 1.5<br>(0.2, 2.7) | 7<br>(1, 11)         | 1.5<br>(0.3, 2.4) | -0.6<br>(-23.6, 58.7)   |
| <b>Djibouti</b>                   | 3<br>(2, 4)          | 1.8<br>(1.2, 2.7) | 12<br>(7, 18)        | 2.1<br>(1.3, 3.1) | 13.6<br>(-22.8, 62.5)   |
| <b>Eritrea</b>                    | 29<br>(18, 47)       | 2.9<br>(1.9, 4.6) | 70<br>(51, 92)       | 3<br>(2.1, 3.9)   | 0.4<br>(-30.6, 53.7)    |
| <b>Ethiopia</b>                   | 594<br>(385, 884)    | 3<br>(2, 4.3)     | 894<br>(753, 1068)   | 2.3<br>(1.9, 2.7) | -24.7<br>(-48.5, 25.9)  |
| <b>Kenya</b>                      | 459<br>(287, 654)    | 5.4<br>(3.4, 7.6) | 1043<br>(700, 1453)  | 4.8<br>(3.3, 6.7) | -10.1<br>(-44.9, 17.5)  |
| <b>Madagascar</b>                 | 117<br>(81, 175)     | 2.2<br>(1.5, 3.3) | 191<br>(132, 251)    | 1.8<br>(1.2, 2.3) | -19.8<br>(-54.9, 24.7)  |
| <b>Malawi</b>                     | 147<br>(88, 195)     | 3.6<br>(2.3, 4.7) | 183<br>(37, 297)     | 2.4<br>(0.5, 3.9) | -32.3<br>(-87.3, 28.7)  |
| <b>Mozambique</b>                 | 116<br>(74, 162)     | 1.9<br>(1.2, 2.6) | 157<br>(26, 261)     | 1.4<br>(0.2, 2.3) | -24<br>(-88.1, 55.4)    |
| <b>Rwanda</b>                     | 133<br>(102, 165)    | 4.4<br>(3.5, 5.5) | 146<br>(89, 207)     | 2.5<br>(1.5, 3.5) | -43.4<br>(-65.8, -17.9) |
| <b>Somalia</b>                    | 62<br>(31, 108)      | 2.3<br>(1.3, 3.9) | 171<br>(104, 264)    | 2.7<br>(1.7, 4.1) | 14.1<br>(-20.1, 75.1)   |

|                                   |                   |                   |                     |                   |                        |
|-----------------------------------|-------------------|-------------------|---------------------|-------------------|------------------------|
| <b>South Sudan</b>                | 58<br>(32, 96)    | 2.4<br>(1.5, 3.9) | 102<br>(65, 152)    | 2.6<br>(1.8, 3.9) | 8.9<br>(-24.7, 67.2)   |
| <b>Tanzania</b>                   | 300<br>(219, 399) | 2.7<br>(2.1, 3.5) | 449<br>(178, 698)   | 1.9<br>(0.7, 2.9) | -30.7<br>(-73.3, 8.7)  |
| <b>Uganda</b>                     | 168<br>(101, 246) | 2.5<br>(1.5, 3.6) | 284<br>(111, 438)   | 2<br>(0.8, 3.1)   | -18.2<br>(-55.3, 15.8) |
| <b>Zambia</b>                     | 140<br>(104, 176) | 4.7<br>(3.5, 5.8) | 226<br>(173, 281)   | 3.5<br>(2.7, 4.3) | -25.8<br>(-40.9, -6.6) |
| <b>Central sub-Saharan Africa</b> | 525<br>(380, 726) | 2.1<br>(1.5, 3)   | 1151<br>(876, 1471) | 2<br>(1.5, 2.7)   | -3.5<br>(-20.4, 18.5)  |
| <b>Angola</b>                     | 105<br>(59, 175)  | 2.5<br>(1.3, 4.2) | 352<br>(256, 498)   | 3<br>(2.2, 4.4)   | 22.2<br>(-17.7, 98.8)  |
| <b>Central African Republic</b>   | 27<br>(15, 39)    | 2<br>(1.1, 2.9)   | 37<br>(16, 61)      | 1.5<br>(0.6, 2.4) | -24.3<br>(-47.9, -0.1) |
| <b>Congo</b>                      | 32<br>(21, 49)    | 2.7<br>(1.8, 4.1) | 65<br>(41, 94)      | 2.4<br>(1.5, 3.6) | -11.1<br>(-32.8, 21.5) |
| <b>DR Congo</b>                   | 338<br>(242, 468) | 2<br>(1.4, 2.7)   | 653<br>(477, 880)   | 1.7<br>(1.2, 2.4) | -12.2<br>(-32.4, 12.8) |
| <b>Equatorial Guinea</b>          | 4<br>(1, 7)       | 2<br>(0.6, 3.4)   | 13<br>(7, 21)       | 2.6<br>(1.3, 4.2) | 27.1<br>(-20.6, 168.8) |
| <b>Gabon</b>                      | 20<br>(14, 28)    | 3.3<br>(2.3, 4.9) | 31<br>(21, 46)      | 2.8<br>(1.8, 4.3) | -14.9<br>(-33.9, 8.9)  |

**Appendix Table 15: Number of deaths and age-standardised death rates of cirrhosis due to other causes per 100 000 in 1990 and 2017 for both sexes and the percentage change by location**

|                                  | 1990                      |                   | 2017                       |                   | Percentage change in age-standardised rates between 1990 and 2017 |
|----------------------------------|---------------------------|-------------------|----------------------------|-------------------|-------------------------------------------------------------------|
|                                  | Counts (95% UI)           | Rate (95% UI)     | Counts (95% UI)            | Rate (95% UI)     |                                                                   |
| <b>Global</b>                    | 109643<br>(96648, 126682) | 2.5<br>(2.2, 2.8) | 146356<br>(130858, 164570) | 1.9<br>(1.7, 2.1) | -23.4<br>(-28.7, -16.8)                                           |
| <b>High-income North America</b> | 8156<br>(7490, 8860)      | 2.3<br>(2.1, 2.5) | 13914<br>(12612, 15160)    | 2.3<br>(2.1, 2.6) | 1.5<br>(-3.3, 7.7)                                                |
| <b>Canada</b>                    | 616<br>(519, 708)         | 1.9<br>(1.6, 2.1) | 1062<br>(893, 1230)        | 1.6<br>(1.3, 1.8) | -16.6<br>(-24.4, -8.1)                                            |
| <b>Greenland</b>                 | 1<br>(1, 1)               | 1.9<br>(1.5, 2.5) | 1<br>(1, 2)                | 1.8<br>(1.3, 2.1) | -4.9<br>(-35.4, 23.1)                                             |
| <b>USA</b>                       | 7539<br>(6916, 8179)      | 2.4<br>(2.2, 2.6) | 12850<br>(11689, 13999)    | 2.4<br>(2.2, 2.7) | 3.4<br>(-1.8, 9.9)                                                |
| <b>Australasia</b>               | 98<br>(83, 114)           | 0.4<br>(0.4, 0.5) | 176<br>(146, 211)          | 0.4<br>(0.3, 0.4) | -16<br>(-25.3, -4.5)                                              |
| <b>Australia</b>                 | 84<br>(70, 99)            | 0.4<br>(0.4, 0.5) | 154<br>(125, 187)          | 0.4<br>(0.3, 0.4) | -14.9<br>(-25.4, -2.3)                                            |
| <b>New Zealand</b>               | 14<br>(12, 16)            | 0.4<br>(0.3, 0.4) | 22<br>(19, 25)             | 0.3<br>(0.2, 0.3) | -22.8<br>(-30.2, -14.6)                                           |
| <b>High-income Asia Pacific</b>  | 3583<br>(3098, 4446)      | 1.9<br>(1.7, 2.3) | 3720<br>(3260, 4212)       | 0.8<br>(0.7, 0.9) | -58.4<br>(-65.9, -54.7)                                           |
| <b>Brunei</b>                    | 2<br>(1, 2)               | 1.5<br>(1.1, 1.9) | 3<br>(2, 4)                | 0.9<br>(0.6, 1.5) | -38.5<br>(-52.4, -3.9)                                            |
| <b>Japan</b>                     | 2100<br>(1874, 2303)      | 1.3<br>(1.2, 1.4) | 2693<br>(2383, 3023)       | 0.7<br>(0.6, 0.7) | -49.8<br>(-53.9, -46.3)                                           |
| <b>Singapore</b>                 | 29<br>(25, 35)            | 1.4<br>(1.1, 1.6) | 43<br>(35, 52)             | 0.6<br>(0.5, 0.8) | -53.1<br>(-59.1, -46.5)                                           |
| <b>South Korea</b>               | 1452<br>(1176, 2312)      | 4.8<br>(3.9, 6.9) | 981<br>(795, 1207)         | 1.2<br>(1, 1.5)   | -74.5<br>(-82.2, -69.6)                                           |
| <b>Western Europe</b>            | 13760<br>(10757, 17465)   | 2.4<br>(1.9, 3)   | 14341<br>(11253, 17933)    | 1.6<br>(1.3, 2)   | -33.3<br>(-38.1, -28.6)                                           |

|                    |                      |                   |                      |                   |                         |
|--------------------|----------------------|-------------------|----------------------|-------------------|-------------------------|
| <b>Andorra</b>     | 1<br>(1, 2)          | 1.9<br>(1.2, 3)   | 2<br>(1, 3)          | 1.4<br>(0.9, 2)   | -29.1<br>(-46.8, -2.9)  |
| <b>Austria</b>     | 392<br>(267, 551)    | 3.4<br>(2.3, 4.8) | 348<br>(237, 483)    | 2<br>(1.4, 2.8)   | -41<br>(-48.9, -31.2)   |
| <b>Belgium</b>     | 252<br>(208, 309)    | 1.6<br>(1.4, 2)   | 297<br>(244, 363)    | 1.3<br>(1, 1.6)   | -23.4<br>(-32.8, -13.7) |
| <b>Cyprus</b>      | 20<br>(12, 29)       | 2.5<br>(1.6, 3.7) | 26<br>(17, 37)       | 1.4<br>(0.9, 1.9) | -43.9<br>(-59.6, -28.1) |
| <b>Denmark</b>     | 116<br>(79, 163)     | 1.6<br>(1.1, 2.3) | 170<br>(112, 239)    | 1.6<br>(1, 2.2)   | -0.6<br>(-15.7, 15.5)   |
| <b>Finland</b>     | 100<br>(70, 136)     | 1.4<br>(1, 2)     | 196<br>(127, 283)    | 1.9<br>(1.3, 2.8) | 31.7<br>(7.2, 56.7)     |
| <b>France</b>      | 2372<br>(1632, 3287) | 2.9<br>(2, 4)     | 2096<br>(1440, 2884) | 1.6<br>(1.1, 2.2) | -45.9<br>(-53.1, -38.8) |
| <b>Germany</b>     | 3725<br>(2599, 5031) | 3<br>(2.1, 4)     | 3892<br>(2636, 5369) | 2.1<br>(1.5, 3)   | -28.3<br>(-38.2, -16.1) |
| <b>Greece</b>      | 338<br>(227, 474)    | 2.2<br>(1.5, 3.1) | 284<br>(193, 388)    | 1.1<br>(0.8, 1.5) | -49.3<br>(-56.5, -40.6) |
| <b>Iceland</b>     | 4<br>(3, 4)          | 1.3<br>(1.1, 1.5) | 5<br>(4, 6)          | 1<br>(0.8, 1.2)   | -20.6<br>(-29.7, -11.1) |
| <b>Ireland</b>     | 41<br>(28, 55)       | 1<br>(0.7, 1.3)   | 75<br>(51, 101)      | 1.1<br>(0.7, 1.4) | 5<br>(-9.9, 19.8)       |
| <b>Israel</b>      | 102<br>(71, 138)     | 2.1<br>(1.5, 2.8) | 189<br>(132, 252)    | 1.6<br>(1.1, 2.1) | -22.8<br>(-32.3, -13.2) |
| <b>Italy</b>       | 2559<br>(2035, 3226) | 2.8<br>(2.3, 3.5) | 1886<br>(1549, 2326) | 1.1<br>(0.9, 1.4) | -59.3<br>(-68.7, -51.4) |
| <b>Luxembourg</b>  | 18<br>(12, 24)       | 3.3<br>(2.3, 4.4) | 19<br>(12, 26)       | 2<br>(1.3, 2.8)   | -40<br>(-52, -28.4)     |
| <b>Malta</b>       | 7<br>(5, 9)          | 1.6<br>(1.1, 2.2) | 9<br>(6, 12)         | 1.1<br>(0.7, 1.4) | -34.5<br>(-42.8, -25.1) |
| <b>Netherlands</b> | 326<br>(228, 428)    | 1.6<br>(1.2, 2.1) | 401<br>(271, 542)    | 1.1<br>(0.8, 1.5) | -29.3<br>(-37.2, -20.4) |

|                               |                      |                   |                      |                   |                         |
|-------------------------------|----------------------|-------------------|----------------------|-------------------|-------------------------|
| <b>Norway</b>                 | 75<br>(65, 87)       | 1.1<br>(1, 1.3)   | 80<br>(69, 94)       | 0.8<br>(0.7, 1)   | -27.6<br>(-35.3, -20)   |
| <b>Portugal</b>               | 619<br>(426, 860)    | 4.7<br>(3.3, 6.3) | 414<br>(277, 573)    | 1.8<br>(1.2, 2.5) | -61.2<br>(-66.9, -55.2) |
| <b>Spain</b>                  | 805<br>(628, 1043)   | 1.5<br>(1.2, 1.9) | 725<br>(555, 969)    | 0.7<br>(0.5, 0.9) | -54.5<br>(-59.5, -48.7) |
| <b>Sweden</b>                 | 163<br>(148, 181)    | 1.1<br>(1, 1.2)   | 236<br>(211, 263)    | 1.1<br>(1, 1.3)   | 2.9<br>(-6, 12.5)       |
| <b>Switzerland</b>            | 149<br>(103, 205)    | 1.4<br>(1, 2)     | 199<br>(136, 269)    | 1.1<br>(0.8, 1.6) | -20.8<br>(-32, -8)      |
| <b>UK</b>                     | 1565<br>(1452, 1681) | 1.8<br>(1.6, 1.9) | 2777<br>(2555, 3037) | 2.4<br>(2.2, 2.6) | 34.2<br>(27.8, 46.1)    |
| <b>Southern Latin America</b> | 1194<br>(996, 1407)  | 2.6<br>(2.1, 3)   | 1775<br>(1447, 2120) | 2.2<br>(1.8, 2.6) | -14.8<br>(-23.9, -5)    |
| <b>Argentina</b>              | 685<br>(575, 804)    | 2.1<br>(1.8, 2.5) | 1026<br>(837, 1248)  | 1.9<br>(1.6, 2.3) | -9.3<br>(-21, 3.3)      |
| <b>Chile</b>                  | 435<br>(358, 517)    | 4.1<br>(3.4, 4.9) | 669<br>(536, 813)    | 2.9<br>(2.3, 3.5) | -29.9<br>(-39, -19.8)   |
| <b>Uruguay</b>                | 75<br>(62, 89)       | 1.9<br>(1.6, 2.3) | 81<br>(65, 98)       | 1.4<br>(1.2, 1.7) | -25.5<br>(-35.1, -14.7) |
| <b>Eastern Europe</b>         | 3143<br>(2790, 3501) | 1.2<br>(1.1, 1.3) | 7079<br>(6364, 7814) | 2.4<br>(2.1, 2.6) | 102<br>(90.8, 113.4)    |
| <b>Belarus</b>                | 89<br>(74, 107)      | 0.7<br>(0.6, 0.8) | 224<br>(182, 270)    | 1.6<br>(1.3, 1.9) | 120.5<br>(83.4, 152.7)  |
| <b>Estonia</b>                | 13<br>(11, 16)       | 0.7<br>(0.6, 0.8) | 23<br>(18, 29)       | 1.1<br>(0.9, 1.4) | 65.3<br>(36.5, 93.9)    |
| <b>Latvia</b>                 | 24<br>(20, 30)       | 0.7<br>(0.6, 0.8) | 38<br>(31, 47)       | 1.2<br>(1, 1.4)   | 70.3<br>(44.8, 98.3)    |
| <b>Lithuania</b>              | 32<br>(26, 38)       | 0.7<br>(0.6, 0.9) | 75<br>(61, 91)       | 1.7<br>(1.4, 2)   | 132.1<br>(109, 155.9)   |
| <b>Moldova</b>                | 325<br>(266, 397)    | 7.1<br>(5.9, 8.5) | 309<br>(252, 380)    | 5.6<br>(4.6, 6.7) | -21<br>(-27, -14.8)     |



|                               |                      |                   |                      |                   |                         |
|-------------------------------|----------------------|-------------------|----------------------|-------------------|-------------------------|
| <b>Russia</b>                 | 1854<br>(1627, 2062) | 1.1<br>(1, 1.2)   | 4768<br>(4282, 5261) | 2.3<br>(2.1, 2.5) | 113.6<br>(99.3, 137.6)  |
| <b>Ukraine</b>                | 807<br>(724, 908)    | 1.2<br>(1.1, 1.3) | 1642<br>(1447, 1869) | 2.7<br>(2.4, 3.1) | 123.8<br>(95.3, 146.7)  |
| <b>Central Europe</b>         | 1795<br>(1504, 2127) | 1.3<br>(1.1, 1.5) | 1873<br>(1533, 2268) | 1<br>(0.8, 1.1)   | -22.9<br>(-27, -19.1)   |
| <b>Albania</b>                | 25<br>(17, 30)       | 1<br>(0.7, 1.3)   | 27<br>(20, 34)       | 0.7<br>(0.6, 0.9) | -30.1<br>(-45.1, 7)     |
| <b>Bosnia and Herzegovina</b> | 49<br>(40, 60)       | 1.2<br>(1, 1.4)   | 41<br>(32, 59)       | 0.7<br>(0.6, 1)   | -38.2<br>(-47.5, -12.8) |
| <b>Bulgaria</b>               | 109<br>(92, 130)     | 1<br>(0.8, 1.1)   | 119<br>(96, 145)     | 1<br>(0.8, 1.1)   | -2.1<br>(-11.3, 7.3)    |
| <b>Croatia</b>                | 97<br>(79, 118)      | 1.5<br>(1.3, 1.8) | 69<br>(55, 86)       | 0.8<br>(0.7, 1)   | -46.2<br>(-50.7, -41.5) |
| <b>Czech Republic</b>         | 124<br>(103, 150)    | 0.9<br>(0.8, 1.1) | 128<br>(104, 155)    | 0.7<br>(0.6, 0.8) | -26.4<br>(-34.5, -18.2) |
| <b>Hungary</b>                | 292<br>(241, 347)    | 2.1<br>(1.7, 2.5) | 173<br>(136, 215)    | 1<br>(0.8, 1.2)   | -53.1<br>(-58.2, -48.3) |
| <b>Montenegro</b>             | 2<br>(2, 3)          | 0.3<br>(0.3, 0.4) | 3<br>(2, 4)          | 0.3<br>(0.2, 0.4) | -10.2<br>(-26.7, 5.2)   |
| <b>North Macedonia</b>        | 11<br>(9, 13)        | 0.6<br>(0.5, 0.7) | 16<br>(12, 19)       | 0.5<br>(0.4, 0.6) | -14<br>(-27.8, 0.5)     |
| <b>Poland</b>                 | 316<br>(263, 381)    | 0.7<br>(0.6, 0.9) | 441<br>(363, 543)    | 0.7<br>(0.6, 0.9) | -1.9<br>(-14.6, 10.3)   |
| <b>Romania</b>                | 554<br>(467, 657)    | 2.1<br>(1.8, 2.4) | 657<br>(529, 803)    | 1.9<br>(1.6, 2.3) | -7.6<br>(-16.1, 0.1)    |
| <b>Serbia</b>                 | 88<br>(68, 112)      | 0.8<br>(0.6, 1)   | 82<br>(66, 103)      | 0.6<br>(0.4, 0.7) | -31.9<br>(-42.2, -17.6) |
| <b>Slovakia</b>               | 85<br>(68, 115)      | 1.4<br>(1.2, 1.9) | 84<br>(66, 105)      | 1<br>(0.8, 1.2)   | -30.6<br>(-49.6, -16.3) |
| <b>Slovenia</b>               | 42<br>(34, 51)       | 1.7<br>(1.4, 2)   | 33<br>(26, 41)       | 0.8<br>(0.7, 1)   | -51.3<br>(-56.3, -46.2) |

|                                  |                      |                   |                      |                   |                         |
|----------------------------------|----------------------|-------------------|----------------------|-------------------|-------------------------|
| <b>Central Asia</b>              | 1587<br>(1416, 1778) | 2.8<br>(2.5, 3.2) | 2902<br>(2479, 3351) | 3.8<br>(3.2, 4.5) | 36.9<br>(27.5, 45.4)    |
| <b>Armenia</b>                   | 38<br>(32, 45)       | 1.4<br>(1.2, 1.7) | 117<br>(94, 145)     | 3<br>(2.4, 3.6)   | 110.5<br>(87, 136.2)    |
| <b>Azerbaijan</b>                | 156<br>(132, 182)    | 2.9<br>(2.3, 3.4) | 289<br>(222, 370)    | 3.7<br>(2.7, 4.8) | 28.3<br>(7.7, 62.3)     |
| <b>Georgia</b>                   | 117<br>(98, 139)     | 2<br>(1.7, 2.3)   | 101<br>(80, 126)     | 1.8<br>(1.5, 2.2) | -7.5<br>(-16.7, 5.5)    |
| <b>Kazakhstan</b>                | 212<br>(181, 247)    | 1.6<br>(1.3, 1.9) | 551<br>(431, 677)    | 3.3<br>(2.6, 4.1) | 109.2<br>(72.6, 137.1)  |
| <b>Kyrgyzstan</b>                | 113<br>(98, 130)     | 3.3<br>(2.8, 3.8) | 180<br>(151, 212)    | 3.7<br>(3.1, 4.3) | 11.7<br>(-1.3, 22.3)    |
| <b>Mongolia</b>                  | 107<br>(82, 129)     | 6.9<br>(5.6, 8.2) | 123<br>(97, 149)     | 6.5<br>(4.3, 8.1) | -6.1<br>(-29, 12.6)     |
| <b>Tajikistan</b>                | 168<br>(138, 197)    | 3.3<br>(2.9, 3.8) | 218<br>(181, 256)    | 3<br>(2.6, 3.6)   | -9.5<br>(-19.9, 0.6)    |
| <b>Turkmenistan</b>              | 115<br>(102, 130)    | 4.2<br>(3.7, 4.9) | 220<br>(186, 255)    | 5<br>(4.3, 5.8)   | 18.5<br>(5.9, 31.1)     |
| <b>Uzbekistan</b>                | 560<br>(500, 625)    | 3.5<br>(3.1, 4)   | 1103<br>(916, 1309)  | 4.4<br>(3.7, 5.3) | 27<br>(13.1, 42.4)      |
| <b>Central Latin<br/>America</b> | 3569<br>(3320, 3827) | 3.4<br>(3.2, 3.7) | 5831<br>(5218, 6452) | 2.5<br>(2.3, 2.8) | -26.5<br>(-30.8, -20.9) |
| <b>Colombia</b>                  | 251<br>(222, 282)    | 1.2<br>(1, 1.3)   | 412<br>(339, 500)    | 0.8<br>(0.6, 0.9) | -32.8<br>(-41.3, -22.6) |
| <b>Costa Rica</b>                | 28<br>(24, 33)       | 1.4<br>(1.2, 1.7) | 71<br>(57, 88)       | 1.5<br>(1.2, 1.8) | 2.4<br>(-9.5, 17.2)     |
| <b>El Salvador</b>               | 122<br>(77, 145)     | 2.9<br>(2.1, 3.5) | 140<br>(111, 182)    | 2.4<br>(1.9, 3.1) | -18.1<br>(-36, 27.5)    |
| <b>Guatemala</b>                 | 321<br>(281, 362)    | 5<br>(4.4, 5.6)   | 485<br>(411, 563)    | 3.9<br>(3.3, 4.5) | -22.6<br>(-31.8, -12.7) |
| <b>Honduras</b>                  | 194<br>(154, 233)    | 5.1<br>(4.3, 6)   | 272<br>(197, 360)    | 4.1<br>(2.9, 5.6) | -20.4<br>(-40.8, 4.2)   |

|                             |                      |                   |                      |                   |                         |
|-----------------------------|----------------------|-------------------|----------------------|-------------------|-------------------------|
| <b>Mexico</b>               | 2360<br>(2206, 2521) | 4.7<br>(4.4, 5)   | 4012<br>(3623, 4418) | 3.6<br>(3.2, 3.9) | -23.8<br>(-28.1, -17.8) |
| <b>Nicaragua</b>            | 54<br>(45, 65)       | 2.2<br>(1.9, 2.6) | 99<br>(69, 120)      | 2.1<br>(1.5, 2.5) | -7.2<br>(-32.9, 10.6)   |
| <b>Panama</b>               | 28<br>(24, 32)       | 1.6<br>(1.4, 1.9) | 50<br>(42, 59)       | 1.3<br>(1.1, 1.5) | -21.1<br>(-29.7, -10.8) |
| <b>Venezuela</b>            | 211<br>(185, 239)    | 1.7<br>(1.5, 2)   | 291<br>(232, 353)    | 1.1<br>(0.9, 1.3) | -38.8<br>(-47.8, -27.8) |
| <b>Andean Latin America</b> | 1185<br>(1011, 1402) | 4.1<br>(3.5, 4.8) | 1609<br>(1345, 1905) | 3<br>(2.5, 3.5)   | -27.4<br>(-37.5, -15.2) |
| <b>Bolivia</b>              | 229<br>(148, 350)    | 5.2<br>(3.6, 7.2) | 330<br>(253, 417)    | 3.9<br>(3, 5)     | -24.4<br>(-43.2, 4.1)   |
| <b>Ecuador</b>              | 252<br>(223, 284)    | 3.6<br>(3.1, 4.1) | 534<br>(448, 631)    | 3.7<br>(3.1, 4.4) | 2.6<br>(-9.6, 16.3)     |
| <b>Peru</b>                 | 704<br>(584, 827)    | 4<br>(3.5, 4.7)   | 745<br>(589, 913)    | 2.4<br>(1.9, 3)   | -40.4<br>(-51.1, -27.5) |
| <b>Caribbean</b>            | 856<br>(718, 1027)   | 2.9<br>(2.5, 3.5) | 902<br>(736, 1160)   | 1.8<br>(1.5, 2.3) | -38.2<br>(-45.1, -23.5) |
| <b>Antigua and Barbuda</b>  | 1<br>(1, 1)          | 2<br>(1.7, 2.4)   | 1<br>(1, 2)          | 1.4<br>(1.2, 1.7) | -29.2<br>(-37.8, -18.7) |
| <b>The Bahamas</b>          | 5<br>(4, 5)          | 2.6<br>(2.2, 3.1) | 6<br>(5, 7)          | 1.7<br>(1.4, 2)   | -35.9<br>(-43.6, -27)   |
| <b>Barbados</b>             | 5<br>(4, 5)          | 1.5<br>(1.3, 1.8) | 4<br>(4, 5)          | 1<br>(0.8, 1.2)   | -36.1<br>(-43.9, -27.6) |
| <b>Belize</b>               | 4<br>(3, 4)          | 3.1<br>(2.6, 3.6) | 7<br>(6, 8)          | 2.4<br>(2, 2.9)   | -20.9<br>(-30.5, -9.4)  |
| <b>Bermuda</b>              | 1<br>(1, 1)          | 1.6<br>(1.3, 1.9) | 1<br>(1, 1)          | 0.6<br>(0.5, 0.8) | -60.4<br>(-66.3, -52)   |
| <b>Cuba</b>                 | 166<br>(141, 197)    | 1.6<br>(1.3, 1.9) | 208<br>(166, 259)    | 1.2<br>(0.9, 1.4) | -25.7<br>(-34.9, -15.8) |
| <b>Dominica</b>             | 1<br>(1, 2)          | 1.9<br>(1.6, 2.3) | 1<br>(1, 2)          | 1.4<br>(1.2, 1.7) | -24.7<br>(-33.4, -13.1) |

|                                             |                      |                   |                      |                   |                         |
|---------------------------------------------|----------------------|-------------------|----------------------|-------------------|-------------------------|
| <b>Dominican Republic</b>                   | 280<br>(213, 330)    | 5.5<br>(3.8, 6.5) | 221<br>(162, 365)    | 2.4<br>(1.8, 4)   | -56.2<br>(-67.7, -6.8)  |
| <b>Grenada</b>                              | 2<br>(2, 2)          | 2.6<br>(2.2, 3.1) | 2<br>(2, 3)          | 1.5<br>(1.2, 1.8) | -43.2<br>(-48.9, -36.6) |
| <b>Guyana</b>                               | 20<br>(18, 23)       | 4.2<br>(3.6, 4.9) | 18<br>(15, 22)       | 3<br>(2.5, 3.6)   | -29.9<br>(-39.2, -19.4) |
| <b>Haiti</b>                                | 167<br>(92, 269)     | 4<br>(2.5, 5.9)   | 212<br>(147, 310)    | 3.1<br>(2.2, 4.7) | -22.9<br>(-44.7, 3.6)   |
| <b>Jamaica</b>                              | 30<br>(27, 34)       | 1.4<br>(1.2, 1.6) | 27<br>(21, 35)       | 0.9<br>(0.7, 1.2) | -34.4<br>(-46.6, -14.4) |
| <b>Puerto Rico</b>                          | 109<br>(91, 130)     | 2.9<br>(2.5, 3.5) | 117<br>(95, 142)     | 1.7<br>(1.4, 2)   | -43.4<br>(-50.2, -36.4) |
| <b>Saint Lucia</b>                          | 3<br>(3, 4)          | 3.1<br>(2.7, 3.6) | 3<br>(3, 4)          | 1.6<br>(1.3, 1.9) | -48.3<br>(-54.1, -41.2) |
| <b>Saint Vincent and<br/>the Grenadines</b> | 2<br>(1, 2)          | 1.9<br>(1.5, 2.2) | 2<br>(1, 2)          | 1.2<br>(1, 1.5)   | -33.8<br>(-42.4, -23.5) |
| <b>Suriname</b>                             | 10<br>(9, 12)        | 3.7<br>(3.1, 4.3) | 15<br>(12, 18)       | 2.7<br>(2.2, 3.2) | -27.5<br>(-36.8, -17.2) |
| <b>Trinidad and<br/>Tobago</b>              | 19<br>(17, 22)       | 2<br>(1.8, 2.4)   | 20<br>(16, 25)       | 1.2<br>(1, 1.5)   | -40.3<br>(-51.1, -28.8) |
| <b>Virgin Islands</b>                       | 2<br>(2, 3)          | 2.7<br>(2.3, 3.2) | 3<br>(3, 4)          | 1.9<br>(1.5, 2.3) | -30<br>(-42.1, -17.6)   |
| <b>Tropical Latin<br/>America</b>           | 3315<br>(3073, 3547) | 3.2<br>(3, 3.4)   | 4868<br>(4442, 5280) | 2.1<br>(2, 2.3)   | -33.3<br>(-36.8, -29.9) |
| <b>Brazil</b>                               | 3258<br>(3016, 3487) | 3.2<br>(3, 3.5)   | 4778<br>(4369, 5183) | 2.2<br>(2, 2.3)   | -33.5<br>(-36.9, -30.1) |
| <b>Paraguay</b>                             | 57<br>(48, 67)       | 2.2<br>(1.8, 2.7) | 89<br>(69, 131)      | 1.7<br>(1.3, 2.4) | -22.9<br>(-40, 0.6)     |
| <b>East Asia</b>                            | 6754<br>(5289, 7719) | 0.7<br>(0.6, 0.8) | 6411<br>(5430, 8846) | 0.4<br>(0.3, 0.5) | -51<br>(-59, -25.5)     |
| <b>China</b>                                | 6341<br>(4911, 7247) | 0.7<br>(0.6, 0.8) | 5842<br>(4904, 8178) | 0.3<br>(0.3, 0.5) | -52.2<br>(-60.6, -25.3) |

|                                   |                        |                    |                         |                   |                         |
|-----------------------------------|------------------------|--------------------|-------------------------|-------------------|-------------------------|
| <b>North Korea</b>                | 113<br>(84, 150)       | 0.7<br>(0.5, 1)    | 205<br>(144, 282)       | 0.7<br>(0.5, 1)   | 1.1<br>(-27.7, 32.5)    |
| <b>Taiwan (province of China)</b> | 188<br>(156, 223)      | 1.4<br>(1.1, 1.6)  | 261<br>(211, 319)       | 0.7<br>(0.6, 0.9) | -47.6<br>(-53.5, -40.7) |
| <b>Southeast Asia</b>             | 10294<br>(8360, 12929) | 3.1<br>(2.6, 3.6)  | 12918<br>(11323, 14711) | 2.3<br>(2, 2.7)   | -25.2<br>(-33.2, -12.9) |
| <b>Cambodia</b>                   | 530<br>(371, 766)      | 7.6<br>(5.7, 10.1) | 770<br>(620, 952)       | 6.9<br>(5.6, 8.8) | -9.4<br>(-28.3, 21.7)   |
| <b>Indonesia</b>                  | 5669<br>(4599, 7338)   | 4.5<br>(3.9, 5.3)  | 6144<br>(5436, 6805)    | 3.3<br>(2.9, 3.7) | -27.7<br>(-36.7, -16.1) |
| <b>Laos</b>                       | 77<br>(48, 122)        | 2.7<br>(1.9, 3.7)  | 125<br>(92, 163)        | 2.7<br>(1.9, 3.6) | -1.1<br>(-36.9, 48)     |
| <b>Malaysia</b>                   | 97<br>(78, 117)        | 1<br>(0.8, 1.2)    | 193<br>(142, 253)       | 0.8<br>(0.6, 1.1) | -15.7<br>(-32.3, 3.7)   |
| <b>Maldives</b>                   | 1<br>(1, 2)            | 0.8<br>(0.6, 1.2)  | 1<br>(1, 2)             | 0.5<br>(0.4, 0.6) | -43.1<br>(-60.7, -9.8)  |
| <b>Mauritius</b>                  | 15<br>(13, 18)         | 1.8<br>(1.5, 2.2)  | 14<br>(12, 18)          | 1<br>(0.8, 1.1)   | -47.5<br>(-53.2, -40.1) |
| <b>Myanmar</b>                    | 1526<br>(989, 2305)    | 4.6<br>(3.1, 6.6)  | 1673<br>(1363, 2050)    | 3.6<br>(2.9, 4.4) | -22.2<br>(-44.6, 14.7)  |
| <b>Philippines</b>                | 284<br>(241, 334)      | 0.7<br>(0.6, 0.8)  | 905<br>(736, 1112)      | 1.3<br>(1, 1.6)   | 83.2<br>(56.6, 112.2)   |
| <b>Sri Lanka</b>                  | 243<br>(200, 290)      | 2<br>(1.6, 2.4)    | 268<br>(203, 355)       | 1.2<br>(0.9, 1.6) | -39.4<br>(-50.8, -27)   |
| <b>Seychelles</b>                 | 1<br>(1, 1)            | 1.4<br>(1.1, 1.8)  | 2<br>(1, 2)             | 1.6<br>(1.3, 2)   | 12.6<br>(-1.9, 31.2)    |
| <b>Thailand</b>                   | 815<br>(671, 982)      | 2<br>(1.6, 2.4)    | 1219<br>(965, 1521)     | 1.3<br>(1.1, 1.6) | -33<br>(-45.2, -20.4)   |
| <b>East Timor</b>                 | 9<br>(6, 16)           | 1.9<br>(1.3, 2.5)  | 20<br>(12, 27)          | 2.2<br>(1.4, 3.1) | 19.8<br>(-26.4, 83.6)   |
| <b>Vietnam</b>                    | 1013<br>(792, 1275)    | 2.2<br>(1.7, 2.9)  | 1566<br>(1202, 2012)    | 1.8<br>(1.4, 2.4) | -17.2<br>(-39.2, 13.4)  |

|                                       |                      |                   |                      |                   |                         |
|---------------------------------------|----------------------|-------------------|----------------------|-------------------|-------------------------|
| <b>Oceania</b>                        | 82<br>(68, 100)      | 1.6<br>(1.4, 2)   | 149<br>(122, 185)    | 1.5<br>(1.3, 1.8) | -6.4<br>(-21.1, 11.1)   |
| <b>American Samoa</b>                 | 0<br>(0, 0)          | 1.1<br>(0.8, 1.4) | 0<br>(0, 0)          | 0.9<br>(0.8, 1.1) | -15<br>(-34.3, 6.1)     |
| <b>Federated States of Micronesia</b> | 2<br>(1, 2)          | 2.1<br>(1.5, 3.1) | 1<br>(1, 2)          | 1.5<br>(1, 2.2)   | -27.8<br>(-45, -6)      |
| <b>Fiji</b>                           | 4<br>(3, 4)          | 0.7<br>(0.5, 0.8) | 6<br>(5, 7)          | 0.8<br>(0.6, 0.9) | 13.6<br>(-7.1, 42.9)    |
| <b>Guam</b>                           | 2<br>(1, 2)          | 1.7<br>(1.3, 2)   | 2<br>(2, 3)          | 1.3<br>(1.1, 1.5) | -24<br>(-38.2, -4.1)    |
| <b>Kiribati</b>                       | 1<br>(1, 2)          | 2.1<br>(1.5, 3)   | 2<br>(1, 2)          | 2<br>(1.3, 3.2)   | -4.9<br>(-23.8, 17.4)   |
| <b>Marshall Islands</b>               | 1<br>(0, 1)          | 2.1<br>(1.5, 2.7) | 1<br>(0, 1)          | 1.7<br>(1.1, 2.3) | -16.8<br>(-33.5, 4.7)   |
| <b>Northern Mariana Islands</b>       | 0<br>(0, 0)          | 1.5<br>(1.2, 1.9) | 1<br>(0, 1)          | 1.2<br>(1, 1.4)   | -18.5<br>(-34.6, 2.8)   |
| <b>Papua New Guinea</b>               | 58<br>(46, 73)       | 1.7<br>(1.4, 2.1) | 115<br>(91, 148)     | 1.6<br>(1.3, 2)   | -8.5<br>(-25.3, 13.8)   |
| <b>Samoa</b>                          | 2<br>(1, 3)          | 1.4<br>(1, 2.3)   | 2<br>(1, 3)          | 1.2<br>(0.9, 1.7) | -15.2<br>(-32.3, 4.4)   |
| <b>Solomon Islands</b>                | 3<br>(3, 4)          | 1.4<br>(1.1, 1.7) | 6<br>(5, 7)          | 1.3<br>(1.1, 1.6) | -5.6<br>(-22.2, 14)     |
| <b>Tonga</b>                          | 1<br>(1, 2)          | 2<br>(1.6, 2.4)   | 2<br>(1, 2)          | 2<br>(1.6, 2.4)   | -2<br>(-20.4, 19.5)     |
| <b>Vanuatu</b>                        | 3<br>(1, 4)          | 2.4<br>(1.2, 4.1) | 5<br>(3, 8)          | 2.2<br>(1.1, 4)   | -8.6<br>(-30.3, 20.1)   |
| <b>North Africa and Middle East</b>   | 5125<br>(3916, 7336) | 2.4<br>(1.9, 2.9) | 6344<br>(5383, 7482) | 1.5<br>(1.2, 1.9) | -35.3<br>(-46.4, -22.5) |
| <b>Afghanistan</b>                    | 187<br>(64, 366)     | 2<br>(0.9, 3.3)   | 403<br>(256, 578)    | 1.8<br>(1.2, 2.8) | -12.3<br>(-46.5, 68.3)  |
| <b>Algeria</b>                        | 224<br>(163, 302)    | 1.3<br>(0.9, 1.9) | 290<br>(214, 377)    | 0.9<br>(0.7, 1.2) | -27.4<br>(-43.4, -8.4)  |

|                     |                      |                    |                      |                    |                         |
|---------------------|----------------------|--------------------|----------------------|--------------------|-------------------------|
| <b>Bahrain</b>      | 3<br>(2, 4)          | 1.5<br>(1.1, 2)    | 5<br>(4, 6)          | 0.7<br>(0.6, 1)    | -51.2<br>(-60.6, -40.5) |
| <b>Egypt</b>        | 2261<br>(1738, 3740) | 9.3<br>(6.9, 11.9) | 2915<br>(2210, 3768) | 7.5<br>(4.4, 10.5) | -19.2<br>(-40.7, 3.6)   |
| <b>Iran</b>         | 482<br>(372, 620)    | 1<br>(0.9, 1.2)    | 472<br>(419, 526)    | 0.7<br>(0.7, 0.8)  | -27.1<br>(-37.4, -12)   |
| <b>Iraq</b>         | 144<br>(104, 190)    | 1<br>(0.8, 1.3)    | 174<br>(146, 206)    | 0.5<br>(0.4, 0.6)  | -52.3<br>(-62.5, -38.4) |
| <b>Jordan</b>       | 28<br>(21, 37)       | 1.2<br>(0.9, 1.5)  | 45<br>(36, 56)       | 0.7<br>(0.6, 0.9)  | -36.7<br>(-51.9, -12.9) |
| <b>Kuwait</b>       | 4<br>(4, 5)          | 0.5<br>(0.4, 0.6)  | 9<br>(7, 11)         | 0.4<br>(0.3, 0.5)  | -17<br>(-34.4, -2)      |
| <b>Lebanon</b>      | 32<br>(26, 41)       | 1.2<br>(0.9, 1.6)  | 51<br>(35, 73)       | 0.8<br>(0.6, 1.2)  | -30.5<br>(-56.7, -1.8)  |
| <b>Libya</b>        | 39<br>(29, 51)       | 1.4<br>(1, 2)      | 56<br>(41, 74)       | 1.2<br>(0.9, 1.7)  | -12.2<br>(-32.3, 16.1)  |
| <b>Morocco</b>      | 276<br>(202, 357)    | 1.4<br>(1.1, 1.9)  | 329<br>(255, 417)    | 1.1<br>(0.9, 1.5)  | -19.7<br>(-37.7, 5.5)   |
| <b>Palestine</b>    | 20<br>(13, 30)       | 1.2<br>(0.8, 1.7)  | 26<br>(22, 31)       | 0.8<br>(0.7, 1.1)  | -29.4<br>(-46.2, -1.2)  |
| <b>Oman</b>         | 11<br>(8, 16)        | 1<br>(0.7, 1.3)    | 14<br>(11, 18)       | 0.7<br>(0.5, 0.9)  | -28.6<br>(-46.6, -5.3)  |
| <b>Qatar</b>        | 2<br>(2, 3)          | 1.8<br>(1.4, 2.4)  | 7<br>(5, 9)          | 1<br>(0.7, 1.3)    | -44.1<br>(-56, -28.2)   |
| <b>Saudi Arabia</b> | 160<br>(120, 211)    | 2.2<br>(1.1, 3.2)  | 157<br>(108, 208)    | 1.4<br>(0.8, 2)    | -35.3<br>(-53.8, -0.3)  |
| <b>Sudan</b>        | 362<br>(157, 756)    | 2.4<br>(1.2, 3.9)  | 444<br>(310, 613)    | 1.6<br>(1, 2.6)    | -30.4<br>(-54, 18.9)    |
| <b>Syria</b>        | 135<br>(100, 186)    | 1.4<br>(1.1, 1.8)  | 157<br>(119, 197)    | 1.2<br>(0.9, 1.5)  | -18.1<br>(-35.2, 7.4)   |
| <b>Tunisia</b>      | 81<br>(63, 103)      | 1.4<br>(1, 1.9)    | 101<br>(75, 133)     | 1<br>(0.7, 1.3)    | -29.2<br>(-49.1, -5.1)  |

|                                    |                         |                   |                         |                   |                         |
|------------------------------------|-------------------------|-------------------|-------------------------|-------------------|-------------------------|
| <b>Turkey</b>                      | 493<br>(304, 731)       | 1<br>(0.7, 1.5)   | 420<br>(340, 513)       | 0.5<br>(0.4, 0.6) | -50.1<br>(-65.7, -22.5) |
| <b>United Arab Emirates</b>        | 4<br>(2, 6)             | 0.9<br>(0.4, 1.4) | 16<br>(8, 23)           | 0.6<br>(0.3, 0.9) | -29.1<br>(-51.1, 7.9)   |
| <b>Yemen</b>                       | 171<br>(78, 278)        | 1.9<br>(1, 3.2)   | 247<br>(175, 335)       | 1.3<br>(0.8, 1.9) | -31.6<br>(-53.7, 11.4)  |
| <b>South Asia</b>                  | 27122<br>(22200, 36349) | 3.2<br>(2.8, 3.9) | 34920<br>(29914, 46161) | 2.5<br>(2.2, 3.4) | -21<br>(-30.7, -7.9)    |
| <b>Bangladesh</b>                  | 5420<br>(4070, 7095)    | 5.3<br>(4.3, 6.4) | 3705<br>(2983, 4701)    | 2.9<br>(2.3, 3.7) | -45.4<br>(-58.7, -28.6) |
| <b>Bhutan</b>                      | 17<br>(12, 25)          | 4.2<br>(3.2, 5.5) | 19<br>(13, 25)          | 2.8<br>(1.9, 3.7) | -34<br>(-53.3, -7.8)    |
| <b>India</b>                       | 16876<br>(13270, 24088) | 2.5<br>(2.1, 3.4) | 22663<br>(18874, 33063) | 2.1<br>(1.7, 3.1) | -18<br>(-29.2, -3.4)    |
| <b>Nepal</b>                       | 465<br>(320, 648)       | 3.2<br>(2.3, 4.2) | 609<br>(439, 826)       | 2.7<br>(1.9, 3.6) | -15.4<br>(-37.1, 14.7)  |
| <b>Pakistan</b>                    | 4344<br>(3505, 5322)    | 5.6<br>(4, 7.5)   | 7924<br>(6068, 9992)    | 5.8<br>(4.1, 7.8) | 5.2<br>(-14.8, 30.7)    |
| <b>Southern sub-Saharan Africa</b> | 895<br>(737, 1022)      | 2.7<br>(2, 3.1)   | 1020<br>(836, 1204)     | 1.8<br>(1.5, 2.1) | -33.2<br>(-47.2, -14.3) |
| <b>Botswana</b>                    | 17<br>(11, 25)          | 2.4<br>(1.5, 3.5) | 28<br>(20, 39)          | 1.9<br>(1.4, 2.6) | -18.8<br>(-39, 11.8)    |
| <b>eSwatini</b>                    | 14<br>(10, 20)          | 3.7<br>(2.6, 5.4) | 18<br>(13, 25)          | 2.7<br>(2, 3.9)   | -26<br>(-45.8, -1.6)    |
| <b>Lesotho</b>                     | 25<br>(11, 38)          | 2.2<br>(0.9, 3.4) | 30<br>(13, 44)          | 2.3<br>(1, 3.4)   | 4.9<br>(-27.2, 57.4)    |
| <b>Namibia</b>                     | 15<br>(8, 22)           | 1.8<br>(0.8, 2.7) | 30<br>(19, 46)          | 1.9<br>(1.1, 2.9) | 6.7<br>(-31.4, 55.5)    |
| <b>South Africa</b>                | 643<br>(524, 744)       | 2.5<br>(1.9, 3)   | 669<br>(574, 762)       | 1.5<br>(1.3, 1.7) | -40.3<br>(-47.5, -25)   |
| <b>Zimbabwe</b>                    | 181<br>(146, 217)       | 3.7<br>(2.8, 4.6) | 246<br>(82, 423)        | 3.3<br>(1, 5.7)   | -11<br>(-73, 48.4)      |



|                                   |                       |                    |                        |                   |                         |
|-----------------------------------|-----------------------|--------------------|------------------------|-------------------|-------------------------|
| <b>Western sub-Saharan Africa</b> | 8676<br>(6314, 11867) | 7.7<br>(4.9, 11.3) | 12408<br>(8549, 16701) | 5.2<br>(3.5, 7.2) | -31.7<br>(-48.4, -11.9) |
| <b>Benin</b>                      | 173<br>(122, 248)     | 6<br>(4, 9)        | 233<br>(167, 309)      | 3.7<br>(2.6, 5.1) | -37.3<br>(-65.7, -8.1)  |
| <b>Burkina Faso</b>               | 323<br>(263, 393)     | 5.9<br>(4.6, 7.2)  | 406<br>(76, 673)       | 3.6<br>(0.4, 6.2) | -39.4<br>(-93.9, 5.4)   |
| <b>Cameroon</b>                   | 410<br>(309, 515)     | 7.3<br>(5.5, 9.2)  | 653<br>(309, 973)      | 4.7<br>(2.1, 7.3) | -35.6<br>(-64.7, -8.9)  |
| <b>Cape Verde</b>                 | 6<br>(5, 8)           | 2.3<br>(1.7, 2.9)  | 13<br>(10, 15)         | 2.7<br>(2.2, 3.3) | 16.9<br>(-10.6, 57)     |
| <b>Chad</b>                       | 179<br>(119, 247)     | 4.7<br>(3, 6.6)    | 343<br>(261, 446)      | 4.3<br>(3.2, 5.7) | -8.9<br>(-29.3, 28.4)   |
| <b>Côte d'Ivoire</b>              | 329<br>(233, 461)     | 5.5<br>(3.9, 8.2)  | 547<br>(414, 734)      | 4.1<br>(3, 5.7)   | -25.7<br>(-50.1, -1.3)  |
| <b>The Gambia</b>                 | 24<br>(15, 33)        | 4.6<br>(2.8, 6.7)  | 47<br>(34, 64)         | 4.1<br>(2.9, 5.7) | -10<br>(-36.2, 31.2)    |
| <b>Ghana</b>                      | 484<br>(383, 616)     | 6.2<br>(4.6, 7.9)  | 683<br>(255, 1067)     | 4<br>(1.4, 6.4)   | -34.8<br>(-80.2, 3.9)   |
| <b>Guinea</b>                     | 260<br>(164, 426)     | 5.9<br>(3.7, 10.1) | 287<br>(182, 457)      | 4.2<br>(2.6, 7)   | -28.5<br>(-44.7, -0.8)  |
| <b>Guinea-Bissau</b>              | 36<br>(24, 54)        | 6.4<br>(4.2, 8.7)  | 46<br>(35, 63)         | 4.9<br>(3.7, 6.8) | -22.8<br>(-41.1, 10.4)  |
| <b>Liberia</b>                    | 114<br>(81, 157)      | 8<br>(5.6, 11.6)   | 123<br>(81, 177)       | 4.8<br>(3.3, 6.7) | -39.9<br>(-52.3, -24.4) |
| <b>Mali</b>                       | 358<br>(217, 578)     | 6.4<br>(4.1, 10.5) | 393<br>(177, 591)      | 3<br>(1.1, 4.8)   | -53.9<br>(-86.8, -22.7) |
| <b>Mauritania</b>                 | 65<br>(47, 90)        | 5.2<br>(3.7, 7.5)  | 72<br>(51, 96)         | 3.1<br>(2.2, 4.2) | -41<br>(-54.6, -26.3)   |
| <b>Niger</b>                      | 242<br>(144, 390)     | 4.6<br>(3.1, 7)    | 305<br>(113, 471)      | 2.5<br>(0.7, 4.2) | -45.4<br>(-79.5, -20.2) |
| <b>Nigeria</b>                    | 5171<br>(3063, 7851)  | 9.4<br>(4.9, 15.2) | 7708<br>(3661, 12391)  | 6.9<br>(3, 11.4)  | -26.8<br>(-47.9, 2.5)   |

|                                   |                      |                     |                        |                     |                        |
|-----------------------------------|----------------------|---------------------|------------------------|---------------------|------------------------|
| <b>São Tomé and Príncipe</b>      | 10<br>(7, 13)        | 10.8<br>(7.5, 14.1) | 13<br>(10, 17)         | 10.4<br>(7.7, 14.1) | -4.3<br>(-35.6, 34.5)  |
| <b>Senegal</b>                    | 192<br>(122, 266)    | 4<br>(2.4, 5.5)     | 239<br>(111, 342)      | 2.7<br>(1.1, 4)     | -32.1<br>(-58, -14)    |
| <b>Sierra Leone</b>               | 184<br>(129, 280)    | 7.2<br>(4.9, 11.1)  | 181<br>(72, 278)       | 4.2<br>(1.5, 6.6)   | -42.1<br>(-85.4, 7.6)  |
| <b>Togo</b>                       | 114<br>(86, 155)     | 6<br>(4.4, 8.4)     | 115<br>(44, 173)       | 2.8<br>(0.9, 4.4)   | -53<br>(-87.2, -20.8)  |
| <b>Eastern sub-Saharan Africa</b> | 6921<br>(5550, 8713) | 8.1<br>(6.7, 9.9)   | 10339<br>(7549, 12917) | 5.9<br>(4.2, 7.6)   | -26.9<br>(-48.6, -3.8) |
| <b>Burundi</b>                    | 280<br>(176, 438)    | 11.6<br>(7.4, 17.5) | 284<br>(88, 466)       | 6.6<br>(1.8, 10.9)  | -43.3<br>(-85, -9.3)   |
| <b>Comoros</b>                    | 9<br>(2, 16)         | 3.9<br>(0.6, 6.7)   | 16<br>(4, 25)          | 3.6<br>(0.7, 5.8)   | -7.2<br>(-27.9, 35.7)  |
| <b>Djibouti</b>                   | 9<br>(5, 13)         | 4.7<br>(3, 6.9)     | 22<br>(14, 33)         | 4<br>(2.5, 6)       | -13.9<br>(-38.4, 21.1) |
| <b>Eritrea</b>                    | 89<br>(50, 150)      | 8.1<br>(5.2, 13.2)  | 194<br>(139, 261)      | 8<br>(5.7, 10.8)    | -1.5<br>(-31.8, 54.4)  |
| <b>Ethiopia</b>                   | 1690<br>(1034, 2640) | 7.8<br>(5.3, 10.9)  | 2413<br>(1993, 2913)   | 5.3<br>(4.5, 6.5)   | -31.8<br>(-52.1, 14.1) |
| <b>Kenya</b>                      | 1167<br>(767, 1642)  | 12.8<br>(8.4, 18)   | 2208<br>(1494, 3122)   | 10.4<br>(7.2, 14.8) | -18.7<br>(-50, 4.7)    |
| <b>Madagascar</b>                 | 409<br>(276, 625)    | 6.3<br>(4.2, 9.7)   | 518<br>(377, 678)      | 4.6<br>(3.2, 6)     | -27.1<br>(-60.3, 13.5) |
| <b>Malawi</b>                     | 426<br>(235, 594)    | 9.2<br>(5.9, 12)    | 500<br>(107, 790)      | 5.7<br>(1.1, 9.3)   | -37.4<br>(-88.4, 15.1) |
| <b>Mozambique</b>                 | 404<br>(257, 539)    | 5.5<br>(3.4, 7.5)   | 517<br>(107, 846)      | 3.8<br>(0.7, 6.3)   | -29.9<br>(-87.5, 30)   |
| <b>Rwanda</b>                     | 393<br>(297, 482)    | 11.6<br>(8.8, 14.7) | 384<br>(233, 547)      | 6.3<br>(3.7, 9.1)   | -45.8<br>(-69, -20.8)  |
| <b>Somalia</b>                    | 167<br>(70, 302)     | 5.7<br>(3, 9.6)     | 437<br>(258, 702)      | 6.2<br>(3.7, 9.9)   | 9<br>(-25.1, 68)       |

|                                   |                      |                     |                      |                   |                         |
|-----------------------------------|----------------------|---------------------|----------------------|-------------------|-------------------------|
| <b>South Sudan</b>                | 141<br>(71, 239)     | 5.3<br>(3.1, 8.6)   | 232<br>(153, 335)    | 5.4<br>(3.6, 7.8) | 0.7<br>(-27.2, 53.1)    |
| <b>Tanzania</b>                   | 853<br>(570, 1150)   | 6.8<br>(5, 9.3)     | 1243<br>(539, 1816)  | 4.4<br>(1.7, 6.9) | -34.5<br>(-74.1, -1.3)  |
| <b>Uganda</b>                     | 489<br>(293, 704)    | 6.5<br>(3.8, 9.5)   | 781<br>(311, 1179)   | 5<br>(1.9, 7.6)   | -22.9<br>(-58.4, 7.1)   |
| <b>Zambia</b>                     | 390<br>(274, 518)    | 11.3<br>(8.5, 14.5) | 582<br>(464, 704)    | 8<br>(6.2, 10.2)  | -28.9<br>(-42.5, -10.9) |
| <b>Central sub-Saharan Africa</b> | 1532<br>(1079, 2141) | 5<br>(3.4, 7.5)     | 2856<br>(2223, 3787) | 4.4<br>(3.2, 6.2) | -12.8<br>(-27, 8.7)     |
| <b>Angola</b>                     | 314<br>(158, 517)    | 5.8<br>(3, 10.3)    | 746<br>(526, 1085)   | 5.5<br>(3.8, 8.7) | -5.8<br>(-35.1, 53.9)   |
| <b>Central African Republic</b>   | 73<br>(37, 110)      | 4.6<br>(2.4, 6.8)   | 94<br>(40, 157)      | 3.5<br>(1.5, 6)   | -23.6<br>(-46.8, 0.2)   |
| <b>Congo</b>                      | 85<br>(59, 124)      | 6.2<br>(4.1, 9.3)   | 133<br>(85, 200)     | 4.9<br>(2.9, 7.7) | -20.8<br>(-39.9, 3.3)   |
| <b>DR Congo</b>                   | 1006<br>(732, 1391)  | 4.7<br>(3.3, 6.9)   | 1811<br>(1357, 2542) | 4.1<br>(2.9, 5.9) | -13.6<br>(-30.9, 7.2)   |
| <b>Equatorial Guinea</b>          | 11<br>(3, 20)        | 4.3<br>(1.3, 7.3)   | 20<br>(10, 34)       | 3.4<br>(1.6, 5.8) | -21.9<br>(-51.1, 59.4)  |
| <b>Gabon</b>                      | 44<br>(30, 65)       | 7<br>(4.6, 10.9)    | 52<br>(34, 79)       | 4.8<br>(3, 7.7)   | -31.6<br>(-46.4, -15.5) |

**Appendix Table 16: Number of prevalent cases and age-standardised prevalence rates of decompensated cirrhosis due to hepatitis B per 100 000 in 1990 and 2017 for both sexes by location**

|                                  | 1990                       |                   | 2017                       |                   |
|----------------------------------|----------------------------|-------------------|----------------------------|-------------------|
|                                  | Counts (95% UI)            | Rate (95% UI)     | Counts (95% UI)            | Rate (95% UI)     |
| <b>Global</b>                    | 1442433 (1371115, 1505204) | 30.9 (29.3, 32.2) | 2974160 (2810195, 3124432) | 36.6 (34.7, 38.4) |
| <b>High-income North America</b> | 18872 (17782, 20038)       | 5.7 (5.3, 6)      | 29199 (27284, 31174)       | 5.8 (5.4, 6.1)    |
| <b>Canada</b>                    | 1547 (1413, 1699)          | 4.8 (4.4, 5.2)    | 2992 (2649, 3350)          | 5.6 (4.9, 6.2)    |
| <b>Greenland</b>                 | 2 (2, 2)                   | 3.9 (3.5, 4.3)    | 3 (3, 4)                   | 5 (4.4, 5.6)      |
| <b>USA</b>                       | 17322 (16364, 18379)       | 5.7 (5.4, 6.1)    | 26202 (24596, 27891)       | 5.8 (5.5, 6.1)    |
| <b>Australasia</b>               | 3103 (2860, 3357)          | 13.6 (12.5, 14.7) | 6533 (5945, 7103)          | 17 (15.5, 18.4)   |
| <b>Australia</b>                 | 2554 (2334, 2788)          | 13.4 (12.3, 14.7) | 5555 (5008, 6086)          | 17.1 (15.4, 18.7) |
| <b>New Zealand</b>               | 549 (518, 578)             | 14.6 (13.7, 15.4) | 978 (918, 1039)            | 16.4 (15.4, 17.4) |
| <b>High-income Asia-Pacific</b>  | 98563 (91451, 105353)      | 48.2 (44.8, 51.4) | 155070 (142676, 167552)    | 51.5 (47.3, 55.6) |
| <b>Brunei</b>                    | 104 (97, 111)              | 59.5 (55.4, 63.5) | 305 (275, 335)             | 72.3 (65.8, 78.7) |
| <b>Japan</b>                     | 57170 (53582, 60911)       | 35 (32.9, 37.2)   | 84931 (79238, 90518)       | 38.3 (35.9, 40.8) |
| <b>Singapore</b>                 | 2051 (1880, 2220)          | 69.2 (63.1, 75.1) | 6655 (6007, 7295)          | 93.8 (85, 102.6)  |
| <b>South Korea</b>               | 39239 (35099, 43093)       | 101.1 (90, 111.1) | 63178 (55965, 70627)       | 80.2 (71.3, 88.9) |
| <b>Western Europe</b>            | 54779 (49927, 59777)       | 11.2 (10.2, 12.2) | 86128 (77551, 95015)       | 13.7 (12.3, 15.1) |
| <b>Andorra</b>                   | 7 (6, 7)                   | 10.3 (9.4, 11.3)  | 16 (15, 18)                | 13.6 (12.3, 15)   |
| <b>Austria</b>                   | 1444 (1316, 1583)          | 14.8 (13.4, 16.2) | 1910 (1728, 2112)          | 14.9 (13.5, 16.4) |
| <b>Belgium</b>                   | 1346 (1100, 1608)          | 10.5 (8.6, 12.6)  | 2209 (1756, 2671)          | 13.8 (11.1, 16.8) |
| <b>Cyprus</b>                    | 55 (51, 60)                | 6.7 (6.1, 7.3)    | 150 (135, 167)             | 8.9 (8, 9.9)      |
| <b>Denmark</b>                   | 595 (545, 648)             | 9.2 (8.4, 10)     | 1210 (1108, 1315)          | 15.1 (13.7, 16.4) |
| <b>Finland</b>                   | 589 (540, 641)             | 9.4 (8.6, 10.2)   | 1286 (1174, 1400)          | 16.2 (14.8, 17.7) |
| <b>France</b>                    | 7335 (6676, 8039)          | 10.5 (9.5, 11.5)  | 11458 (10444, 12494)       | 12.6 (11.5, 13.7) |

|                       |                      |                   |                         |                   |
|-----------------------|----------------------|-------------------|-------------------------|-------------------|
| <b>Germany</b>        | 11527 (10509, 12573) | 11 (10, 12)       | 17939 (16256, 19826)    | 14·3 (12·9, 15·7) |
| <b>Greece</b>         | 1500 (1362, 1642)    | 11·3 (10·3, 12·4) | 2452 (2178, 2757)       | 15·6 (13·8, 17·6) |
| <b>Iceland</b>        | 17 (15, 19)          | 6·3 (5·5, 7·1)    | 54 (48, 60)             | 12·6 (11·2, 14·2) |
| <b>Ireland</b>        | 274 (251, 300)       | 7·4 (6·8, 8·1)    | 856 (779, 939)          | 13·8 (12·6, 15·1) |
| <b>Israel</b>         | 448 (411, 484)       | 9·4 (8·7, 10·2)   | 1326 (1194, 1458)       | 13·7 (12·3, 15·1) |
| <b>Italy</b>          | 15942 (14177, 17629) | 20·8 (18·6, 23)   | 21113 (18536, 23799)    | 22·2 (19·6, 25)   |
| <b>Luxembourg</b>     | 71 (65, 77)          | 14·3 (13·1, 15·6) | 133 (118, 148)          | 16·4 (14·7, 18·2) |
| <b>Malta</b>          | 28 (25, 30)          | 6·5 (5·9, 7·1)    | 58 (52, 64)             | 9·1 (8·2, 10)     |
| <b>Netherlands</b>    | 1412 (1296, 1535)    | 7·8 (7·1, 8·5)    | 3165 (2871, 3454)       | 13·1 (11·9, 14·2) |
| <b>Norway</b>         | 482 (456, 510)       | 9·4 (8·9, 10)     | 842 (793, 891)          | 12 (11·3, 12·7)   |
| <b>Portugal</b>       | 1224 (1103, 1365)    | 9·9 (8·9, 11)     | 1686 (1511, 1876)       | 10·4 (9·4, 11·6)  |
| <b>Spain</b>          | 5196 (4221, 6213)    | 10·8 (8·8, 12·9)  | 7930 (6402, 9536)       | 11·5 (9·4, 13·9)  |
| <b>Sweden</b>         | 806 (747, 865)       | 7·4 (6·9, 8)      | 1575 (1460, 1692)       | 11·6 (10·7, 12·4) |
| <b>Switzerland</b>    | 743 (682, 809)       | 8·3 (7·6, 9·1)    | 1469 (1336, 1599)       | 11·7 (10·7, 12·7) |
| <b>United Kingdom</b> | 3686 (3397, 3982)    | 5·3 (4·9, 5·7)    | 7200 (6606, 7783)       | 8·1 (7·4, 8·7)    |
| <b>Eastern Europe</b> | 65913 (61693, 70107) | 24·8 (23·3, 26·4) | 111512 (103568, 119006) | 39·5 (36·8, 42·1) |
| <b>Belarus</b>        | 2808 (2526, 3104)    | 23·5 (21·2, 26)   | 4566 (4046, 5119)       | 35·4 (31·5, 39·3) |
| <b>Estonia</b>        | 480 (431, 532)       | 26·2 (23·5, 28·8) | 633 (558, 708)          | 35·5 (31·4, 39·6) |
| <b>Latvia</b>         | 748 (670, 826)       | 23·3 (21, 25·7)   | 891 (790, 994)          | 33·2 (29·5, 37)   |
| <b>Lithuania</b>      | 1155 (1041, 1274)    | 27·3 (24·5, 30)   | 1540 (1355, 1724)       | 39·5 (35·1, 44·1) |
| <b>Moldova</b>        | 2962 (2642, 3308)    | 62 (55·5, 68·9)   | 2483 (2201, 2792)       | 48·7 (43·3, 54·3) |
| <b>Russia</b>         | 40663 (38088, 43109) | 23·2 (21·8, 24·6) | 74761 (69651, 79541)    | 38·3 (35·7, 40·6) |
| <b>Ukraine</b>        | 17097 (15883, 18261) | 26·7 (24·9, 28·5) | 26638 (24618, 28527)    | 44 (40·8, 47·1)   |
| <b>Central Europe</b> | 63985 (58608, 69293) | 44·4 (40·7, 48)   | 86698 (78931, 94805)    | 51·8 (47·2, 56·2) |
| <b>Albania</b>        | 1127 (1030, 1223)    | 42·8 (39·1, 46·6) | 2045 (1853, 2236)       | 55·9 (51, 61·1)   |

|                               |                      |                   |                      |                   |
|-------------------------------|----------------------|-------------------|----------------------|-------------------|
| <b>Bosnia and Herzegovina</b> | 2206 (2016, 2404)    | 46.2 (42.4, 50.1) | 2772 (2499, 3051)    | 55.4 (50.2, 60.3) |
| <b>Bulgaria</b>               | 4379 (4000, 4773)    | 38.1 (34.9, 41.3) | 5282 (4772, 5795)    | 48.8 (44.4, 53.3) |
| <b>Croatia</b>                | 3383 (3079, 3688)    | 54.2 (49.5, 58.9) | 3044 (2752, 3367)    | 46.9 (42.5, 51.6) |
| <b>Czech Republic</b>         | 4745 (4325, 5187)    | 38 (34.7, 41.4)   | 6901 (6251, 7582)    | 43.8 (39.7, 47.9) |
| <b>Hungary</b>                | 8461 (7715, 9199)    | 63.9 (58.2, 69.3) | 7873 (7032, 8727)    | 53.7 (48.2, 59.1) |
| <b>Macedonia</b>              | 805 (733, 873)       | 38.8 (35.4, 42.1) | 1570 (1420, 1723)    | 52.5 (47.6, 57.1) |
| <b>Montenegro</b>             | 250 (229, 273)       | 38 (34.6, 41.3)   | 420 (379, 462)       | 49.5 (44.9, 54)   |
| <b>Poland</b>                 | 15997 (14645, 17377) | 36.9 (33.8, 40)   | 29178 (26534, 32126) | 53.5 (48.8, 58.3) |
| <b>Romania</b>                | 13995 (12748, 15349) | 50.6 (46.4, 55.2) | 16257 (14637, 17850) | 55.5 (50.1, 60.6) |
| <b>Serbia</b>                 | 3519 (3179, 3854)    | 30.6 (27.9, 33.5) | 4541 (4095, 4996)    | 36.3 (33, 39.7)   |
| <b>Slovakia</b>               | 3722 (3412, 4061)    | 64 (58.7, 69.7)   | 5284 (4746, 5804)    | 68.3 (61.6, 74.8) |
| <b>Slovenia</b>               | 1397 (1276, 1527)    | 57.8 (52.9, 63.2) | 1532 (1385, 1682)    | 48.3 (44, 52.8)   |
| <b>Central Asia</b>           | 15717 (14696, 16748) | 28 (26.1, 29.8)   | 33767 (31213, 36328) | 38.6 (35.8, 41.6) |
| <b>Armenia</b>                | 816 (760, 875)       | 25.6 (23.9, 27.3) | 1417 (1307, 1538)    | 37.4 (34.7, 40.4) |
| <b>Azerbaijan</b>             | 1702 (1579, 1825)    | 28.2 (26.2, 30.2) | 4245 (3877, 4592)    | 39.3 (36.2, 42.5) |
| <b>Georgia</b>                | 1723 (1594, 1863)    | 27.9 (25.9, 29.9) | 1827 (1672, 1990)    | 37.5 (34.5, 40.5) |
| <b>Kazakhstan</b>             | 3280 (3048, 3510)    | 21.7 (20.2, 23.2) | 6597 (6063, 7138)    | 35.6 (32.7, 38.4) |
| <b>Kyrgyzstan</b>             | 1117 (1040, 1197)    | 32.1 (29.8, 34.4) | 2248 (2070, 2428)    | 40.9 (37.7, 44)   |
| <b>Mongolia</b>               | 432 (401, 461)       | 31 (28.6, 33.3)   | 1032 (951, 1112)     | 34.6 (32, 37.2)   |
| <b>Tajikistan</b>             | 1008 (936, 1078)     | 28.3 (26.2, 30.3) | 2679 (2467, 2889)    | 37.7 (34.8, 40.7) |
| <b>Turkmenistan</b>           | 843 (780, 902)       | 33.1 (30.7, 35.5) | 1981 (1828, 2137)    | 41.9 (38.7, 45.2) |
| <b>Uzbekistan</b>             | 4797 (4470, 5122)    | 33.1 (30.7, 35.4) | 11741 (10818, 12656) | 40.5 (37.4, 43.5) |
| <b>Central Latin America</b>  | 9219 (8491, 9905)    | 8.5 (7.8, 9.2)    | 26745 (24365, 29127) | 10.8 (9.9, 11.8)  |
| <b>Colombia</b>               | 1259 (1122, 1400)    | 5.4 (4.8, 6)      | 5218 (4619, 5848)    | 9.8 (8.7, 10.9)   |
| <b>Costa Rica</b>             | 144 (129, 159)       | 6.6 (5.9, 7.3)    | 526 (466, 588)       | 10.4 (9.3, 11.7)  |

|                             |                   |                   |                      |                   |
|-----------------------------|-------------------|-------------------|----------------------|-------------------|
| <b>El Salvador</b>          | 249 (223, 278)    | 7·1 (6·4, 8)      | 580 (513, 647)       | 10·1 (8·9, 11·2)  |
| <b>Guatemala</b>            | 410 (367, 456)    | 8·5 (7·6, 9·5)    | 1374 (1220, 1537)    | 11 (9·7, 12·2)    |
| <b>Honduras</b>             | 224 (200, 251)    | 8·5 (7·6, 9·5)    | 762 (677, 854)       | 11 (9·8, 12·3)    |
| <b>Mexico</b>               | 5908 (5513, 6323) | 10·7 (9·9, 11·4)  | 14042 (12957, 15032) | 11·4 (10·5, 12·1) |
| <b>Nicaragua</b>            | 152 (136, 168)    | 7·3 (6·5, 8·1)    | 548 (488, 613)       | 10·5 (9·4, 11·7)  |
| <b>Panama</b>               | 111 (99, 123)     | 6·2 (5·6, 6·9)    | 418 (371, 467)       | 10·4 (9·3, 11·6)  |
| <b>Venezuela</b>            | 762 (684, 846)    | 6 (5·4, 6·6)      | 3279 (2902, 3674)    | 10·6 (9·5, 11·9)  |
| <b>Andean Latin America</b> | 3100 (2788, 3421) | 12·7 (11·4, 14)   | 12125 (10853, 13502) | 21·6 (19·3, 24·1) |
| <b>Bolivia</b>              | 445 (399, 492)    | 11·4 (10·3, 12·7) | 1863 (1665, 2067)    | 19·7 (17·6, 21·8) |
| <b>Ecuador</b>              | 855 (769, 940)    | 13·3 (12, 14·6)   | 3404 (3047, 3781)    | 22·2 (19·9, 24·7) |
| <b>Peru</b>                 | 1800 (1615, 1999) | 12·7 (11·4, 14·1) | 6859 (6140, 7662)    | 21·8 (19·5, 24·5) |
| <b>Caribbean</b>            | 2333 (2177, 2491) | 8·1 (7·6, 8·7)    | 5739 (5311, 6136)    | 11·4 (10·5, 12·2) |
| <b>Antigua and Barbuda</b>  | 4 (4, 5)          | 8·2 (7·6, 8·8)    | 11 (11, 12)          | 11 (10·2, 11·9)   |
| <b>The Bahamas</b>          | 16 (14, 17)       | 8·1 (7·5, 8·7)    | 43 (40, 46)          | 10·5 (9·8, 11·3)  |
| <b>Barbados</b>             | 20 (19, 22)       | 7·5 (6·9, 8·1)    | 46 (42, 49)          | 10·9 (10, 11·7)   |
| <b>Belize</b>               | 9 (8, 10)         | 8·2 (7·6, 8·8)    | 36 (33, 38)          | 11·4 (10·6, 12·2) |
| <b>Bermuda</b>              | 5 (5, 6)          | 7·7 (7·1, 8·3)    | 13 (12, 14)          | 12·7 (11·6, 13·8) |
| <b>Cuba</b>                 | 787 (732, 844)    | 7·3 (6·8, 7·9)    | 1940 (1793, 2094)    | 11·8 (10·9, 12·6) |
| <b>Dominica</b>             | 5 (4, 5)          | 7·2 (6·7, 7·8)    | 9 (9, 10)            | 11·3 (10·5, 12·2) |
| <b>Dominican Republic</b>   | 400 (371, 430)    | 8·7 (8·1, 9·4)    | 1148 (1064, 1237)    | 11·7 (10·8, 12·6) |
| <b>Grenada</b>              | 5 (5, 6)          | 7·9 (7·3, 8·5)    | 14 (13, 15)          | 10·7 (9·9, 11·5)  |
| <b>Guyana</b>               | 46 (42, 49)       | 9·2 (8·5, 9·8)    | 72 (66, 78)          | 10·5 (9·7, 11·3)  |
| <b>Haiti</b>                | 256 (237, 276)    | 6·4 (5·9, 6·9)    | 896 (817, 971)       | 10·4 (9·6, 11·3)  |
| <b>Jamaica</b>              | 128 (119, 137)    | 7 (6·4, 7·5)      | 320 (297, 345)       | 11 (10·2, 11·8)   |
| <b>Puerto Rico</b>          | 450 (419, 481)    | 12·3 (11·4, 13·1) | 669 (617, 722)       | 12 (11·1, 12·9)   |

|                                         |                         |                   |                            |                   |
|-----------------------------------------|-------------------------|-------------------|----------------------------|-------------------|
| <b>Saint Lucia</b>                      | 8 (7, 9)                | 8.3 (7.6, 8.9)    | 22 (21, 24)                | 10.8 (10, 11.6)   |
| <b>Saint Vincent and the Grenadines</b> | 6 (5, 6)                | 7.4 (6.8, 7.9)    | 14 (13, 15)                | 10.4 (9.6, 11.3)  |
| <b>Suriname</b>                         | 25 (23, 27)             | 8.4 (7.8, 9)      | 69 (64, 74)                | 11.4 (10.5, 12.3) |
| <b>Trinidad and Tobago</b>              | 75 (70, 81)             | 7.7 (7.1, 8.3)    | 193 (178, 209)             | 11.1 (10.3, 12)   |
| <b>Virgin Islands</b>                   | 8 (7, 9)                | 8.2 (7.6, 8.7)    | 17 (16, 19)                | 11.2 (10.3, 12)   |
| <b>Tropical Latin America</b>           | 15938 (15021, 16805)    | 13.9 (13.1, 14.6) | 32415 (30406, 34276)       | 13.4 (12.6, 14.2) |
| <b>Brazil</b>                           | 15618 (14735, 16459)    | 13.9 (13.1, 14.7) | 31503 (29562, 33302)       | 13.4 (12.6, 14.1) |
| <b>Paraguay</b>                         | 320 (289, 352)          | 11.8 (10.6, 13)   | 912 (822, 1008)            | 15.3 (13.8, 16.9) |
| <b>Southern Latin America</b>           | 6918 (6485, 7389)       | 14.4 (13.5, 15.4) | 16219 (15135, 17349)       | 21.3 (19.9, 22.8) |
| <b>Argentina</b>                        | 4065 (3801, 4355)       | 12.4 (11.6, 13.3) | 10096 (9388, 10801)        | 20.3 (18.9, 21.8) |
| <b>Chile</b>                            | 2407 (2243, 2570)       | 21.1 (19.6, 22.5) | 5214 (4843, 5602)          | 23.6 (21.9, 25.4) |
| <b>Uruguay</b>                          | 446 (416, 477)          | 12.5 (11.6, 13.3) | 909 (847, 973)             | 20.8 (19.4, 22.3) |
| <b>East Asia</b>                        | 720200 (693693, 745196) | 64.3 (61.9, 66.5) | 1542217 (1473507, 1606200) | 78.1 (74.9, 81.2) |
| <b>China</b>                            | 691782 (666122, 715824) | 65.1 (62.6, 67.3) | 1477532 (1412281, 1538714) | 78.7 (75.5, 81.7) |
| <b>North Korea</b>                      | 7647 (7230, 8031)       | 39.6 (37.5, 41.5) | 19621 (18481, 20713)       | 62.6 (59.2, 65.9) |
| <b>Taiwan (Province of China)</b>       | 8772 (8257, 9289)       | 47.2 (44.5, 49.8) | 20220 (18770, 21568)       | 59.7 (55.7, 63.5) |
| <b>Southeast Asia</b>                   | 41012 (38044, 44050)    | 12.1 (11.2, 13)   | 114434 (105240, 123878)    | 17.2 (15.8, 18.5) |
| <b>Cambodia</b>                         | 725 (681, 768)          | 11.7 (11, 12.4)   | 2358 (2192, 2517)          | 17.2 (16.1, 18.4) |
| <b>Indonesia</b>                        | 16828 (15469, 18187)    | 12.6 (11.6, 13.7) | 30391 (27813, 33052)       | 12.1 (11.1, 13.1) |
| <b>Laos</b>                             | 309 (289, 329)          | 11.5 (10.7, 12.2) | 1003 (940, 1071)           | 18.2 (17.1, 19.4) |
| <b>Malaysia</b>                         | 1674 (1519, 1828)       | 13 (11.8, 14.2)   | 7134 (6389, 7869)          | 24 (21.6, 26.5)   |
| <b>Maldives</b>                         | 15 (14, 16)             | 11.8 (11.1, 12.5) | 89 (82, 95)                | 20 (18.6, 21.4)   |
| <b>Mauritius</b>                        | 129 (121, 137)          | 13.6 (12.8, 14.4) | 277 (256, 298)             | 17.3 (16.1, 18.5) |
| <b>Myanmar</b>                          | 3550 (3327, 3772)       | 12 (11.3, 12.7)   | 8666 (7966, 9309)          | 16.9 (15.5, 18)   |
| <b>Philippines</b>                      | 2748 (2578, 2926)       | 6.2 (5.8, 6.6)    | 12447 (11473, 13417)       | 14.1 (13, 15.1)   |



|                                       |                       |                   |                         |                   |
|---------------------------------------|-----------------------|-------------------|-------------------------|-------------------|
| <b>Sri Lanka</b>                      | 1736 (1628, 1847)     | 12.4 (11.7, 13.1) | 4598 (4254, 4920)       | 18.7 (17.4, 19.9) |
| <b>Seychelles</b>                     | 7 (7, 8)              | 11.7 (11, 12.4)   | 22 (20, 24)             | 19.2 (17.7, 20.5) |
| <b>Thailand</b>                       | 5291 (4597, 6072)     | 11.3 (9.9, 12.9)  | 17189 (14645, 19851)    | 18.1 (15.5, 20.8) |
| <b>East Timor</b>                     | 55 (51, 59)           | 11.6 (10.9, 12.3) | 180 (167, 192)          | 19.4 (18.1, 20.8) |
| <b>Vietnam</b>                        | 7891 (7363, 8370)     | 16.3 (15.2, 17.4) | 29930 (27642, 32259)    | 29.3 (27.2, 31.5) |
| <b>Oceania</b>                        | 831 (789, 873)        | 18.2 (17.3, 19)   | 2503 (2360, 2640)       | 25.3 (24, 26.6)   |
| <b>American Samoa</b>                 | 7 (7, 8)              | 20.7 (19.3, 21.9) | 16 (15, 18)             | 31.6 (29.3, 33.7) |
| <b>Federated States of Micronesia</b> | 15 (14, 16)           | 21.4 (20.3, 22.5) | 26 (24, 27)             | 28.1 (26.4, 29.5) |
| <b>Fiji</b>                           | 97 (92, 103)          | 16.5 (15.7, 17.3) | 226 (213, 238)          | 25.5 (24.1, 26.9) |
| <b>Guam</b>                           | 27 (26, 29)           | 23.7 (22.4, 24.9) | 62 (58, 65)             | 34.5 (32.4, 36.4) |
| <b>Kiribati</b>                       | 11 (10, 12)           | 20.1 (19.2, 21)   | 26 (25, 28)             | 27.5 (25.9, 28.9) |
| <b>Marshall Islands</b>               | 6 (5, 6)              | 20.9 (19.8, 21.9) | 14 (13, 15)             | 28.8 (27.2, 30.4) |
| <b>Northern Mariana Islands</b>       | 10 (9, 10)            | 25.4 (24.1, 26.8) | 20 (19, 22)             | 36.4 (34.3, 38.4) |
| <b>Papua New Guinea</b>               | 492 (465, 518)        | 17.3 (16.4, 18.1) | 1695 (1596, 1793)       | 24.2 (22.9, 25.6) |
| <b>Samoa</b>                          | 27 (25, 28)           | 23.4 (22.2, 24.7) | 55 (52, 58)             | 33.4 (31.7, 35.3) |
| <b>Solomon Islands</b>                | 43 (41, 46)           | 20.2 (19.1, 21.2) | 131 (123, 139)          | 27.3 (25.8, 28.7) |
| <b>Tonga</b>                          | 16 (15, 17)           | 23.3 (22.1, 24.4) | 29 (27, 30)             | 31.8 (29.9, 33.6) |
| <b>Vanuatu</b>                        | 24 (23, 25)           | 23.6 (22.4, 24.8) | 65 (62, 69)             | 29.4 (27.9, 31)   |
| <b>North Africa and Middle East</b>   | 96065 (88650, 103330) | 43.4 (40, 46.8)   | 218467 (200829, 235258) | 43.8 (40.2, 47.2) |
| <b>Afghanistan</b>                    | 2967 (2773, 3165)     | 39.3 (36.9, 41.8) | 6795 (6359, 7272)       | 40.7 (38.1, 43.2) |
| <b>Algeria</b>                        | 6646 (6250, 7037)     | 41.6 (39.1, 44)   | 15846 (14872, 16747)    | 43 (40.3, 45.6)   |
| <b>Bahrain</b>                        | 150 (141, 158)        | 44.3 (41.6, 46.9) | 647 (602, 688)          | 44.1 (41.3, 46.8) |
| <b>Egypt</b>                          | 18554 (15671, 21392)  | 51.8 (44, 60.2)   | 31515 (26117, 36859)    | 43.5 (36.1, 50.6) |
| <b>Iran</b>                           | 13815 (12903, 14686)  | 36.5 (34, 38.8)   | 32053 (29735, 34313)    | 39.3 (36.5, 42.1) |
| <b>Iraq</b>                           | 3937 (3699, 4164)     | 37.8 (35.5, 40)   | 11540 (10837, 12294)    | 37.6 (35.2, 40)   |

|                                    |                         |                   |                         |                   |
|------------------------------------|-------------------------|-------------------|-------------------------|-------------------|
| <b>Jordan</b>                      | 904 (845, 960)          | 43 (40.4, 45.7)   | 3572 (3331, 3797)       | 44.8 (41.8, 47.5) |
| <b>Kuwait</b>                      | 481 (452, 511)          | 38.7 (36.4, 40.9) | 1628 (1514, 1742)       | 43.2 (40.4, 46.1) |
| <b>Lebanon</b>                     | 1187 (1119, 1254)       | 43.1 (40.5, 45.6) | 3499 (3290, 3694)       | 49.8 (46.8, 52.7) |
| <b>Libya</b>                       | 1047 (987, 1110)        | 41.5 (39.1, 43.9) | 2445 (2284, 2596)       | 42.4 (39.6, 45.1) |
| <b>Morocco</b>                     | 6944 (6535, 7362)       | 39.3 (36.9, 41.8) | 13728 (12839, 14592)    | 40.2 (37.5, 42.7) |
| <b>Palestine</b>                   | 476 (447, 505)          | 41.3 (38.8, 43.7) | 1393 (1304, 1479)       | 42.6 (39.8, 45.2) |
| <b>Oman</b>                        | 533 (500, 564)          | 47 (44, 49.7)     | 1596 (1491, 1698)       | 44.8 (41.9, 47.5) |
| <b>Qatar</b>                       | 140 (131, 150)          | 47.1 (43.9, 50.1) | 1120 (1042, 1206)       | 49.3 (45.9, 52.8) |
| <b>Saudi Arabia</b>                | 2605 (2186, 3027)       | 28.6 (23.9, 33.8) | 7412 (6079, 8935)       | 27.7 (22.8, 32.7) |
| <b>Sudan</b>                       | 5257 (4935, 5578)       | 43.3 (40.7, 45.9) | 10655 (10010, 11291)    | 43.9 (41.2, 46.7) |
| <b>Syria</b>                       | 2888 (2724, 3052)       | 39.9 (37.7, 42.1) | 6362 (5949, 6774)       | 43 (40.2, 45.8)   |
| <b>Tunisia</b>                     | 2017 (1547, 2536)       | 33.6 (26.1, 41.4) | 4261 (3193, 5439)       | 34 (25.9, 43)     |
| <b>Turkey</b>                      | 22207 (20512, 23899)    | 52 (47.9, 56)     | 51007 (46640, 55218)    | 57.9 (53, 62.7)   |
| <b>United Arab Emirates</b>        | 539 (504, 576)          | 44.7 (42.1, 47.2) | 4309 (3984, 4639)       | 46.4 (43.5, 49.3) |
| <b>Yemen</b>                       | 2711 (2541, 2877)       | 38.5 (36.1, 40.9) | 6880 (6425, 7320)       | 38.3 (35.7, 40.9) |
| <b>South Asia</b>                  | 109207 (103112, 115038) | 13.1 (12.4, 13.8) | 246927 (231917, 260786) | 15.1 (14.3, 16)   |
| <b>Bangladesh</b>                  | 10389 (9745, 11049)     | 14.5 (13.7, 15.4) | 20525 (19252, 21768)    | 14.2 (13.3, 15)   |
| <b>Bhutan</b>                      | 58 (54, 62)             | 15.4 (14.5, 16.3) | 131 (122, 140)          | 15.1 (14.1, 16)   |
| <b>India</b>                       | 87717 (82943, 92191)    | 13 (12.3, 13.6)   | 203150 (191776, 213953) | 15.7 (14.8, 16.5) |
| <b>Nepal</b>                       | 1390 (1215, 1574)       | 10.2 (9, 11.5)    | 2567 (2240, 2910)       | 9.9 (8.7, 11.2)   |
| <b>Pakistan</b>                    | 9652 (8615, 10825)      | 13.2 (11.8, 14.8) | 20554 (18013, 23231)    | 12.8 (11.3, 14.4) |
| <b>Southern sub-Saharan Africa</b> | 7225 (6718, 7722)       | 20.3 (18.9, 21.7) | 9870 (9142, 10568)      | 14.7 (13.7, 15.7) |
| <b>Botswana</b>                    | 135 (122, 150)          | 17.3 (15.6, 19.1) | 293 (260, 324)          | 15.8 (14.1, 17.5) |
| <b>Lesotho</b>                     | 224 (202, 246)          | 18.5 (16.8, 20.3) | 225 (201, 249)          | 14.9 (13.4, 16.4) |
| <b>Namibia</b>                     | 124 (111, 137)          | 13.7 (12.3, 15.2) | 278 (248, 311)          | 15.7 (14, 17.5)   |

|                                   |                      |                   |                         |                   |
|-----------------------------------|----------------------|-------------------|-------------------------|-------------------|
| <b>South Africa</b>               | 5344 (5007, 5669)    | 20.1 (18.8, 21.4) | 7222 (6757, 7672)       | 14.1 (13.2, 14.9) |
| <b>Swaziland</b>                  | 76 (69, 84)          | 17.9 (16.1, 19.6) | 120 (108, 132)          | 15.5 (13.9, 17.1) |
| <b>Zimbabwe</b>                   | 1321 (1194, 1444)    | 23.4 (21.1, 25.6) | 1732 (1552, 1913)       | 18.3 (16.5, 20.2) |
| <b>Western sub-Saharan Africa</b> | 68435 (63946, 72384) | 60.2 (56.5, 63.9) | 148929 (138802, 158243) | 60.2 (56, 64.1)   |
| <b>Benin</b>                      | 1720 (1614, 1827)    | 66.1 (62, 70.1)   | 4120 (3825, 4389)       | 63.5 (59, 67.9)   |
| <b>Burkina Faso</b>               | 4225 (3977, 4471)    | 77.6 (73.2, 81.9) | 8020 (7450, 8549)       | 67.5 (63.1, 72.2) |
| <b>Cameroon</b>                   | 3397 (3167, 3609)    | 57.7 (53.9, 61.5) | 8983 (8362, 9598)       | 55.9 (52.1, 60.1) |
| <b>Cape Verde</b>                 | 155 (146, 165)       | 66.4 (62.3, 70.4) | 303 (282, 323)          | 63.4 (58.9, 67.8) |
| <b>Chad</b>                       | 2549 (2393, 2693)    | 73.6 (69.3, 77.6) | 5259 (4896, 5585)       | 70.6 (65.9, 75)   |
| <b>Côte d'Ivoire</b>              | 3741 (3495, 3982)    | 59.4 (55.6, 63.1) | 8697 (8078, 9278)       | 58.2 (54.1, 62)   |
| <b>The Gambia</b>                 | 353 (330, 373)       | 68.3 (64.2, 72)   | 823 (769, 878)          | 65.6 (61.2, 70)   |
| <b>Ghana</b>                      | 4533 (4226, 4826)    | 52.2 (48.9, 55.6) | 10922 (10145, 11722)    | 53.2 (49.3, 57)   |
| <b>Guinea</b>                     | 2642 (2477, 2792)    | 67.1 (63.1, 70.8) | 4503 (4200, 4804)       | 65.5 (60.9, 70)   |
| <b>Guinea-Bissau</b>              | 356 (334, 377)       | 65.3 (61.2, 69)   | 642 (599, 685)          | 61.9 (58, 65.9)   |
| <b>Liberia</b>                    | 907 (851, 963)       | 70 (65.9, 74.2)   | 2063 (1928, 2199)       | 73.4 (68.4, 78.2) |
| <b>Mali</b>                       | 4111 (3862, 4346)    | 80.6 (76.1, 85.2) | 9026 (8446, 9634)       | 82.9 (77.7, 88.3) |
| <b>Mauritania</b>                 | 787 (737, 834)       | 62.5 (58.5, 66.3) | 1607 (1498, 1710)       | 64.5 (60.2, 68.9) |
| <b>Niger</b>                      | 3253 (3058, 3436)    | 79.7 (75.2, 84.1) | 8578 (8029, 9120)       | 83.3 (78.1, 88.4) |
| <b>Nigeria</b>                    | 29542 (27376, 31531) | 53.1 (49.2, 56.9) | 62685 (57605, 67187)    | 54.5 (50.4, 58.7) |
| <b>São Tomé and Príncipe</b>      | 58 (54, 61)          | 77.4 (72.6, 82)   | 97 (91, 104)            | 72.5 (67.5, 77.6) |
| <b>Senegal</b>                    | 2897 (2720, 3059)    | 68.5 (64.6, 72.2) | 6397 (5977, 6816)       | 69.3 (64.8, 73.8) |
| <b>Sierra Leone</b>               | 2003 (1891, 2118)    | 83.9 (79.2, 88.8) | 3107 (2902, 3308)       | 66.6 (62.1, 71.1) |
| <b>Togo</b>                       | 1204 (1126, 1277)    | 65.5 (61.4, 69.2) | 3095 (2864, 3303)       | 64.5 (59.8, 69)   |
| <b>Eastern sub-Saharan Africa</b> | 28114 (25673, 30566) | 28.2 (25.7, 30.7) | 59036 (53788, 64274)    | 27.5 (25, 30)     |
| <b>Burundi</b>                    | 692 (627, 760)       | 23.4 (21.2, 25.7) | 1292 (1165, 1419)       | 21.9 (19.8, 24.1) |

|                                   |                      |                   |                      |                   |
|-----------------------------------|----------------------|-------------------|----------------------|-------------------|
| <b>Comoros</b>                    | 70 (63, 76)          | 26.8 (24.3, 29.4) | 142 (128, 155)       | 26 (23.4, 28.4)   |
| <b>Djibouti</b>                   | 67 (60, 73)          | 26.7 (24.2, 29.2) | 225 (202, 247)       | 28 (25.4, 30.8)   |
| <b>Eritrea</b>                    | 338 (306, 373)       | 23.8 (21.6, 26.1) | 747 (674, 825)       | 21.9 (19.9, 24.1) |
| <b>Ethiopia</b>                   | 7995 (7313, 8661)    | 30 (27.4, 32.5)   | 17205 (15788, 18670) | 31.3 (28.5, 33.9) |
| <b>Kenya</b>                      | 4669 (4253, 5064)    | 42.8 (39, 46.5)   | 10703 (9650, 11700)  | 38 (34.4, 41.6)   |
| <b>Madagascar</b>                 | 1772 (1612, 1937)    | 26.6 (24.2, 29.3) | 3707 (3371, 4080)    | 25 (22.8, 27.4)   |
| <b>Malawi</b>                     | 1494 (1351, 1636)    | 28.4 (25.7, 31.2) | 2470 (2249, 2699)    | 25.5 (23.1, 28.2) |
| <b>Mozambique</b>                 | 2120 (1926, 2318)    | 26.2 (23.8, 28.6) | 4008 (3630, 4391)    | 26 (23.6, 28.5)   |
| <b>Rwanda</b>                     | 597 (468, 739)       | 15.6 (12.3, 19.2) | 976 (757, 1219)      | 12.8 (10, 15.9)   |
| <b>Somalia</b>                    | 904 (817, 991)       | 23.7 (21.4, 26)   | 2292 (2058, 2534)    | 25.3 (22.8, 27.9) |
| <b>South Sudan</b>                | 942 (857, 1027)      | 29 (26.4, 31.7)   | 1557 (1406, 1714)    | 29.5 (26.6, 32.5) |
| <b>Tanzania</b>                   | 3406 (3103, 3721)    | 24.3 (22, 26.6)   | 7366 (6675, 8068)    | 23.6 (21.4, 26)   |
| <b>Uganda</b>                     | 2023 (1844, 2201)    | 23.4 (21.3, 25.7) | 4206 (3825, 4618)    | 22 (19.9, 24.1)   |
| <b>Zambia</b>                     | 1010 (921, 1102)     | 26.1 (23.7, 28.5) | 2103 (1898, 2308)    | 22.9 (20.7, 25.1) |
| <b>Central sub-Saharan Africa</b> | 12904 (11858, 13899) | 41.3 (38, 44.6)   | 29627 (26916, 32127) | 40.9 (37.4, 44.5) |
| <b>Angola</b>                     | 2522 (2317, 2733)    | 44.2 (40.8, 48)   | 6167 (5629, 6717)    | 39.6 (36.1, 43.1) |
| <b>Central African Republic</b>   | 544 (497, 591)       | 34.2 (31.4, 37.1) | 1047 (948, 1144)     | 35.4 (32.2, 38.5) |
| <b>Congo</b>                      | 465 (424, 503)       | 32.8 (30, 35.6)   | 1198 (1090, 1308)    | 34.6 (31.6, 37.8) |
| <b>DR Congo</b>                   | 9049 (8297, 9748)    | 41.9 (38.6, 45.3) | 20493 (18590, 22303) | 42.4 (38.7, 46.1) |
| <b>Equatorial Guinea</b>          | 92 (84, 100)         | 36.5 (33.5, 39.7) | 279 (252, 305)       | 38.2 (34.5, 41.6) |
| <b>Gabon</b>                      | 232 (211, 251)       | 35 (31.8, 37.9)   | 443 (400, 486)       | 34.1 (31.1, 37.3) |

**Appendix Table 17: Number of prevalent cases and age-standardised prevalence rates of decompensated cirrhosis due to hepatitis C per 100 000 in 1990 and 2017 for both sexes by location**

|                                  | 1990                       |                      | 2017                       |                      |
|----------------------------------|----------------------------|----------------------|----------------------------|----------------------|
|                                  | Counts (95% UI)            | Rate (95% UI)        | Counts (95% UI)            | Rate (95% UI)        |
| <b>Global</b>                    | 1233294 (1162816, 1300880) | 27.2 (25.7, 28.7)    | 2641473 (2487047, 2806144) | 32.5 (30.6, 34.5)    |
| <b>High-income North America</b> | 104668 (100354, 109176)    | 31.8 (30.4, 33.1)    | 187598 (178813, 196786)    | 36.9 (35.2, 38.6)    |
| <b>Canada</b>                    | 8587 (8058, 9128)          | 26.8 (25, 28.4)      | 17043 (15845, 18199)       | 31.6 (29.5, 33.7)    |
| <b>Greenland</b>                 | 11 (10, 12)                | 21.8 (20.4, 23.2)    | 19 (18, 20)                | 27 (25.2, 28.8)      |
| <b>USA</b>                       | 96068 (92156, 100147)      | 32.3 (31, 33.7)      | 170532 (162684, 178761)    | 37.5 (35.9, 39.2)    |
| <b>Australasia</b>               | 3292 (3062, 3521)          | 14.6 (13.5, 15.6)    | 8044 (7446, 8608)          | 21 (19.4, 22.4)      |
| <b>Australia</b>                 | 2729 (2517, 2938)          | 14.5 (13.3, 15.6)    | 6873 (6299, 7393)          | 21.2 (19.5, 22.9)    |
| <b>New Zealand</b>               | 564 (535, 594)             | 15.1 (14.3, 15.9)    | 1171 (1107, 1236)          | 19.6 (18.5, 20.7)    |
| <b>High-income Asia-Pacific</b>  | 229080 (221268, 237380)    | 110.5 (106.9, 114.4) | 337525 (324277, 352397)    | 107.3 (103.3, 111.9) |
| <b>Brunei</b>                    | 57 (52, 61)                | 34.1 (31.4, 36.8)    | 207 (188, 224)             | 48.9 (44.9, 52.8)    |
| <b>Japan</b>                     | 219137 (212261, 226922)    | 132.7 (128.5, 137.2) | 317879 (306205, 331418)    | 145.7 (140.5, 151.6) |
| <b>Singapore</b>                 | 456 (382, 533)             | 15.4 (13, 18.1)      | 1725 (1431, 2033)          | 24 (20.1, 28.2)      |
| <b>South Korea</b>               | 9430 (8042, 10741)         | 24.5 (21.1, 27.9)    | 17715 (15420, 20161)       | 22 (19.4, 24.9)      |
| <b>Western Europe</b>            | 146385 (135507, 157195)    | 29.7 (27.4, 31.9)    | 249319 (231759, 267818)    | 39.3 (36.4, 42.1)    |
| <b>Andorra</b>                   | 13 (12, 14)                | 20.6 (18.9, 22.3)    | 38 (35, 41)                | 31.3 (28.9, 33.7)    |
| <b>Austria</b>                   | 3185 (2939, 3430)          | 32.6 (30.1, 35.3)    | 4773 (4399, 5156)          | 36.9 (33.9, 39.8)    |
| <b>Belgium</b>                   | 3093 (2530, 3686)          | 24.2 (19.8, 28.9)    | 5957 (4710, 7200)          | 37 (29.7, 44.4)      |
| <b>Cyprus</b>                    | 109 (101, 117)             | 13.3 (12.3, 14.3)    | 347 (321, 373)             | 20.6 (19, 22.2)      |
| <b>Denmark</b>                   | 1197 (1108, 1283)          | 18.5 (17.1, 19.9)    | 2442 (2260, 2637)          | 30.2 (27.9, 32.6)    |
| <b>Finland</b>                   | 1184 (1094, 1270)          | 18.8 (17.4, 20.2)    | 2615 (2408, 2812)          | 32.8 (30.2, 35.4)    |
| <b>France</b>                    | 15150 (13978, 16344)       | 21.7 (19.9, 23.4)    | 25306 (23509, 27162)       | 27.6 (25.5, 29.6)    |

|                       |                       |                    |                         |                     |
|-----------------------|-----------------------|--------------------|-------------------------|---------------------|
| <b>Germany</b>        | 23583 (21698, 25356)  | 22.2 (20.4, 24)    | 41706 (38541, 45033)    | 32.9 (30.4, 35.5)   |
| <b>Greece</b>         | 2172 (2011, 2323)     | 16.3 (15.1, 17.4)  | 4085 (3794, 4394)       | 26.1 (24.1, 28.2)   |
| <b>Iceland</b>        | 19 (13, 26)           | 7.4 (5, 10.1)      | 65 (43, 90)             | 14.9 (10.1, 20.6)   |
| <b>Ireland</b>        | 541 (500, 581)        | 14.7 (13.5, 15.8)  | 1718 (1583, 1860)       | 27.5 (25.3, 29.8)   |
| <b>Israel</b>         | 879 (819, 937)        | 18.8 (17.5, 20.1)  | 3040 (2821, 3258)       | 31.5 (29.1, 33.9)   |
| <b>Italy</b>          | 64411 (59813, 68800)  | 83.7 (77.8, 89.3)  | 99945 (94033, 106188)   | 104.7 (98.5, 111.3) |
| <b>Luxembourg</b>     | 143 (132, 154)        | 28.9 (26.6, 31.1)  | 308 (283, 336)          | 37.7 (34.7, 40.9)   |
| <b>Malta</b>          | 55 (51, 59)           | 12.9 (11.9, 13.9)  | 129 (120, 139)          | 20.2 (18.5, 21.8)   |
| <b>Netherlands</b>    | 2720 (2525, 2926)     | 15.1 (14, 16.2)    | 6399 (5914, 6882)       | 26.1 (24.1, 28)     |
| <b>Norway</b>         | 959 (907, 1012)       | 18.9 (17.8, 20)    | 1714 (1618, 1810)       | 24.2 (22.8, 25.6)   |
| <b>Portugal</b>       | 2471 (2259, 2719)     | 19.8 (18, 21.8)    | 3894 (3565, 4235)       | 24 (22, 26.1)       |
| <b>Spain</b>          | 16512 (13606, 19507)  | 34.2 (28.2, 40.2)  | 28657 (23668, 33778)    | 41.5 (34.4, 48.6)   |
| <b>Sweden</b>         | 1488 (1289, 1692)     | 13.6 (11.7, 15.5)  | 2975 (2587, 3405)       | 21.7 (18.8, 24.9)   |
| <b>Switzerland</b>    | 1490 (1375, 1591)     | 16.7 (15.4, 17.9)  | 2960 (2724, 3187)       | 23.5 (21.6, 25.3)   |
| <b>United Kingdom</b> | 4868 (4467, 5271)     | 7 (6.3, 7.6)       | 9989 (9117, 10926)      | 11.1 (10.1, 12.1)   |
| <b>Eastern Europe</b> | 99439 (93688, 104762) | 36.9 (34.8, 38.9)  | 201797 (189966, 213261) | 70 (65.7, 74)       |
| <b>Belarus</b>        | 4200 (3791, 4590)     | 34.6 (31.4, 37.8)  | 8428 (7613, 9250)       | 63.7 (57.4, 69.7)   |
| <b>Estonia</b>        | 731 (664, 797)        | 39.1 (35.6, 42.4)  | 1164 (1059, 1268)       | 63.8 (57.7, 69.9)   |
| <b>Latvia</b>         | 1139 (1039, 1249)     | 34.7 (31.6, 37.9)  | 1638 (1491, 1794)       | 59.6 (53.7, 65.5)   |
| <b>Lithuania</b>      | 1733 (1579, 1889)     | 40.4 (36.8, 44.1)  | 2841 (2577, 3112)       | 71 (64.1, 77.6)     |
| <b>Moldova</b>        | 4666 (4210, 5136)     | 97.3 (88.2, 106.9) | 4461 (4042, 4894)       | 86.1 (77.9, 93.8)   |
| <b>Russia</b>         | 60998 (57824, 64163)  | 34.4 (32.6, 36.2)  | 136707 (128778, 144492) | 68.6 (64.5, 72.5)   |
| <b>Ukraine</b>        | 25972 (24351, 27361)  | 39.7 (37.3, 41.8)  | 46558 (43680, 49404)    | 75.5 (70.7, 80.2)   |
| <b>Central Europe</b> | 40837 (36565, 44944)  | 28 (25.1, 30.7)    | 66030 (59113, 72567)    | 38.9 (35, 42.7)     |
| <b>Albania</b>        | 681 (609, 751)        | 26.4 (23.6, 29.1)  | 1572 (1408, 1745)       | 42.4 (38.1, 46.9)   |

|                               |                      |                   |                         |                   |
|-------------------------------|----------------------|-------------------|-------------------------|-------------------|
| <b>Bosnia and Herzegovina</b> | 1382 (1227, 1531)    | 28.8 (25.6, 31.7) | 2106 (1873, 2343)       | 41.3 (36.9, 45.8) |
| <b>Bulgaria</b>               | 2721 (2423, 3019)    | 23.1 (20.7, 25.4) | 4001 (3576, 4439)       | 36.4 (32.8, 40.5) |
| <b>Croatia</b>                | 2111 (1864, 2364)    | 33.2 (29.5, 37.1) | 2256 (2013, 2516)       | 34.3 (30.7, 38)   |
| <b>Czech Republic</b>         | 3019 (2707, 3323)    | 23.9 (21.4, 26.3) | 5363 (4819, 5942)       | 33.6 (30.1, 37.2) |
| <b>Hungary</b>                | 5451 (4823, 6063)    | 40.5 (35.9, 45)   | 5124 (4547, 5710)       | 34.5 (30.6, 38.2) |
| <b>Macedonia</b>              | 503 (448, 558)       | 24.2 (21.6, 26.6) | 1185 (1046, 1322)       | 39 (34.5, 43.4)   |
| <b>Montenegro</b>             | 156 (139, 173)       | 23.5 (21.1, 26)   | 317 (281, 350)          | 36.8 (32.8, 40.7) |
| <b>Poland</b>                 | 10097 (9060, 11144)  | 23.1 (20.7, 25.5) | 22605 (20110, 24926)    | 40.7 (36.2, 45.1) |
| <b>Romania</b>                | 9114 (8088, 10172)   | 32.4 (28.9, 35.9) | 12679 (11279, 14027)    | 42.7 (38.1, 47.3) |
| <b>Serbia</b>                 | 2348 (2074, 2613)    | 20 (17.8, 22.1)   | 3559 (3182, 3957)       | 28.1 (25.2, 31.3) |
| <b>Slovakia</b>               | 2339 (2089, 2582)    | 40 (35.8, 44.3)   | 4076 (3644, 4516)       | 51.9 (46.2, 57.3) |
| <b>Slovenia</b>               | 915 (808, 1014)      | 37.5 (33.2, 41.5) | 1188 (1061, 1315)       | 36.8 (33.1, 40.6) |
| <b>Central Asia</b>           | 15273 (14227, 16294) | 27.8 (26, 29.5)   | 39001 (36098, 41748)    | 44.8 (41.7, 47.7) |
| <b>Armenia</b>                | 799 (738, 854)       | 25.3 (23.4, 27)   | 1713 (1595, 1833)       | 44.6 (41.6, 47.7) |
| <b>Azerbaijan</b>             | 1671 (1553, 1792)    | 28.3 (26.3, 30.3) | 4765 (4393, 5149)       | 43.9 (40.6, 47.1) |
| <b>Georgia</b>                | 1783 (1651, 1916)    | 28.5 (26.4, 30.5) | 2148 (1990, 2303)       | 43.2 (40.1, 46.4) |
| <b>Kazakhstan</b>             | 3267 (3028, 3494)    | 21.9 (20.3, 23.4) | 8024 (7416, 8622)       | 43.1 (39.9, 46.2) |
| <b>Kyrgyzstan</b>             | 1086 (1009, 1161)    | 31.9 (29.6, 34.1) | 2582 (2376, 2779)       | 47.5 (44.1, 50.9) |
| <b>Mongolia</b>               | 403 (374, 431)       | 30.2 (28.2, 32.3) | 1195 (1098, 1292)       | 40.5 (37.4, 43.4) |
| <b>Tajikistan</b>             | 964 (899, 1034)      | 28.1 (26.2, 30.2) | 3019 (2776, 3238)       | 43.3 (40.3, 46.3) |
| <b>Turkmenistan</b>           | 794 (735, 851)       | 32.5 (30.2, 34.7) | 2303 (2117, 2472)       | 49 (45.2, 52.3)   |
| <b>Uzbekistan</b>             | 4507 (4167, 4830)    | 32.3 (29.9, 34.5) | 13254 (12216, 14314)    | 46.1 (42.8, 49.5) |
| <b>Central Latin America</b>  | 48117 (45284, 50656) | 44.8 (42.3, 47.2) | 154965 (145109, 165098) | 62.5 (58.7, 66.5) |
| <b>Colombia</b>               | 5418 (4975, 5852)    | 23.4 (21.5, 25.3) | 26370 (24296, 28735)    | 49.2 (45.4, 53.6) |
| <b>Costa Rica</b>             | 697 (641, 752)       | 32.4 (29.8, 35.1) | 2923 (2681, 3196)       | 57.6 (53, 62.7)   |

|                             |                      |                   |                      |                   |
|-----------------------------|----------------------|-------------------|----------------------|-------------------|
| <b>El Salvador</b>          | 1193 (1099, 1287)    | 34.4 (31.7, 37.1) | 3277 (3018, 3565)    | 57.2 (52.7, 62.3) |
| <b>Guatemala</b>            | 1954 (1813, 2103)    | 40.7 (37.8, 43.7) | 7559 (6992, 8186)    | 61 (56.3, 66.1)   |
| <b>Honduras</b>             | 1054 (975, 1138)     | 40.1 (37.1, 43.3) | 4203 (3863, 4561)    | 60.9 (55.9, 66.1) |
| <b>Mexico</b>               | 32822 (31095, 34371) | 59.7 (56.7, 62.5) | 87890 (82953, 92628) | 70.8 (67.1, 74.6) |
| <b>Nicaragua</b>            | 744 (688, 806)       | 36.1 (33.5, 39.2) | 3133 (2875, 3402)    | 60.1 (55.2, 65.3) |
| <b>Panama</b>               | 539 (498, 580)       | 30.4 (28.1, 32.8) | 2263 (2083, 2450)    | 56.3 (51.9, 60.9) |
| <b>Venezuela</b>            | 3697 (3413, 3975)    | 29.3 (27, 31.5)   | 17347 (15901, 18920) | 56.1 (51.4, 61)   |
| <b>Andean Latin America</b> | 2874 (2589, 3165)    | 11.7 (10.5, 12.9) | 13437 (12157, 14798) | 23.9 (21.6, 26.4) |
| <b>Bolivia</b>              | 409 (367, 452)       | 10.5 (9.4, 11.6)  | 2133 (1923, 2360)    | 22.4 (20.1, 24.8) |
| <b>Ecuador</b>              | 789 (706, 872)       | 12.2 (11, 13.6)   | 3915 (3528, 4316)    | 25.5 (23, 28.1)   |
| <b>Peru</b>                 | 1676 (1501, 1855)    | 11.8 (10.5, 13.1) | 7389 (6691, 8184)    | 23.5 (21.2, 26)   |
| <b>Caribbean</b>            | 4748 (4492, 5010)    | 16.7 (15.7, 17.6) | 13503 (12709, 14348) | 26.7 (25.1, 28.3) |
| <b>Antigua and Barbuda</b>  | 9 (8, 9)             | 17 (16, 18.1)     | 28 (26, 30)          | 26.8 (25.1, 28.5) |
| <b>The Bahamas</b>          | 32 (30, 34)          | 16.9 (15.8, 18)   | 105 (98, 112)        | 25.4 (23.9, 27.1) |
| <b>Barbados</b>             | 41 (38, 43)          | 15.5 (14.5, 16.5) | 111 (104, 118)       | 26.2 (24.6, 27.8) |
| <b>Belize</b>               | 18 (17, 19)          | 16.8 (15.8, 17.9) | 85 (79, 91)          | 27.1 (25.4, 28.9) |
| <b>Bermuda</b>              | 11 (10, 11)          | 15.9 (14.8, 17.1) | 28 (26, 30)          | 26.5 (24.7, 28.3) |
| <b>Cuba</b>                 | 1607 (1514, 1703)    | 15 (14.2, 16)     | 4778 (4469, 5116)    | 28.6 (26.8, 30.5) |
| <b>Dominica</b>             | 10 (9, 10)           | 15 (14.2, 15.9)   | 22 (21, 23)          | 26 (24.4, 27.7)   |
| <b>Dominican Republic</b>   | 816 (764, 866)       | 17.9 (16.8, 19.1) | 2669 (2499, 2861)    | 27.1 (25.4, 29)   |
| <b>Grenada</b>              | 11 (10, 11)          | 16.2 (15.2, 17.2) | 34 (32, 36)          | 25.7 (24.1, 27.4) |
| <b>Guyana</b>               | 91 (85, 97)          | 18.5 (17.4, 19.7) | 176 (164, 189)       | 25.4 (23.7, 27.1) |
| <b>Haiti</b>                | 520 (485, 555)       | 13 (12.1, 13.9)   | 1845 (1725, 1964)    | 21.6 (20.2, 23)   |
| <b>Jamaica</b>              | 258 (243, 273)       | 14.3 (13.4, 15.1) | 777 (726, 827)       | 26.5 (24.8, 28.2) |
| <b>Puerto Rico</b>          | 915 (859, 972)       | 25.1 (23.5, 26.6) | 1627 (1526, 1732)    | 29.2 (27.4, 31.2) |



|                                         |                         |                   |                         |                   |
|-----------------------------------------|-------------------------|-------------------|-------------------------|-------------------|
| <b>Saint Lucia</b>                      | 16 (15, 17)             | 17.2 (16.1, 18.2) | 54 (51, 58)             | 25.9 (24.3, 27.6) |
| <b>Saint Vincent and the Grenadines</b> | 12 (11, 12)             | 15.1 (14.2, 16.1) | 33 (31, 35)             | 24.8 (23.1, 26.6) |
| <b>Suriname</b>                         | 51 (48, 54)             | 17.3 (16.3, 18.4) | 158 (147, 169)          | 25.8 (24.2, 27.6) |
| <b>Trinidad and Tobago</b>              | 152 (142, 161)          | 15.7 (14.8, 16.7) | 446 (416, 476)          | 25.4 (23.8, 27.2) |
| <b>Virgin Islands</b>                   | 17 (16, 18)             | 17 (15.9, 18.1)   | 42 (39, 45)             | 26.7 (24.9, 28.6) |
| <b>Tropical Latin America</b>           | 25946 (24671, 27161)    | 22.7 (21.6, 23.7) | 61538 (58422, 64711)    | 25.4 (24.1, 26.6) |
| <b>Brazil</b>                           | 25469 (24227, 26639)    | 22.8 (21.7, 23.8) | 59963 (56931, 63046)    | 25.3 (24.1, 26.6) |
| <b>Paraguay</b>                         | 477 (437, 518)          | 17.7 (16.2, 19.2) | 1575 (1436, 1721)       | 26.4 (24.1, 28.7) |
| <b>Southern Latin America</b>           | 13441 (12710, 14157)    | 28.1 (26.6, 29.6) | 35954 (33914, 38014)    | 47.2 (44.5, 49.9) |
| <b>Argentina</b>                        | 7874 (7429, 8349)       | 24 (22.7, 25.4)   | 22194 (20857, 23590)    | 44.8 (42.1, 47.6) |
| <b>Chile</b>                            | 4702 (4422, 4971)       | 41.5 (39, 44)     | 11732 (10986, 12432)    | 52.5 (49.3, 55.6) |
| <b>Uruguay</b>                          | 865 (816, 911)          | 24.2 (22.8, 25.5) | 2026 (1906, 2142)       | 46.5 (43.8, 49.1) |
| <b>East Asia</b>                        | 212886 (197171, 228983) | 19.2 (17.8, 20.7) | 545950 (503175, 589606) | 27.1 (25.2, 29.2) |
| <b>China</b>                            | 202481 (187448, 217798) | 19.2 (17.8, 20.7) | 517360 (477117, 558840) | 27 (25.1, 29.1)   |
| <b>North Korea</b>                      | 2644 (2436, 2865)       | 13.6 (12.6, 14.7) | 7795 (7197, 8418)       | 24.6 (22.8, 26.4) |
| <b>Taiwan (Province of China)</b>       | 4215 (3750, 4670)       | 22.8 (20.2, 25.2) | 12001 (10622, 13462)    | 34.8 (31, 38.9)   |
| <b>Southeast Asia</b>                   | 40629 (37734, 43361)    | 12 (11.2, 12.8)   | 114082 (105450, 122791) | 16.9 (15.7, 18.2) |
| <b>Cambodia</b>                         | 549 (513, 586)          | 8.9 (8.4, 9.5)    | 2083 (1932, 2233)       | 15.2 (14.1, 16.2) |
| <b>Indonesia</b>                        | 23841 (22255, 25462)    | 17.9 (16.7, 19)   | 46713 (43519, 49848)    | 18.4 (17.3, 19.6) |
| <b>Laos</b>                             | 215 (199, 230)          | 8 (7.4, 8.6)      | 768 (713, 824)          | 13.9 (13, 14.9)   |
| <b>Malaysia</b>                         | 674 (561, 794)          | 5.3 (4.4, 6.2)    | 3316 (2770, 3879)       | 11.1 (9.4, 13)    |
| <b>Maldives</b>                         | 11 (10, 12)             | 8.6 (8, 9.2)      | 76 (70, 82)             | 17.3 (16.1, 18.5) |
| <b>Mauritius</b>                        | 96 (89, 103)            | 10.2 (9.5, 11)    | 248 (230, 266)          | 15.2 (14.1, 16.3) |
| <b>Myanmar</b>                          | 2560 (2383, 2740)       | 8.7 (8.1, 9.3)    | 7502 (6959, 8046)       | 14.5 (13.5, 15.5) |
| <b>Philippines</b>                      | 1923 (1781, 2067)       | 4.4 (4.1, 4.7)    | 10381 (9591, 11177)     | 11.7 (10.9, 12.5) |

|                                       |                         |                   |                         |                   |
|---------------------------------------|-------------------------|-------------------|-------------------------|-------------------|
| <b>Sri Lanka</b>                      | 1312 (1218, 1404)       | 9·4 (8·8, 10·1)   | 4175 (3887, 4462)       | 16·8 (15·7, 17·9) |
| <b>Seychelles</b>                     | 5 (5, 6)                | 8·9 (8·3, 9·5)    | 20 (18, 21)             | 16·9 (15·6, 18·2) |
| <b>Thailand</b>                       | 3912 (3293, 4549)       | 8·4 (7, 9·7)      | 14530 (12044, 17060)    | 15·1 (12·6, 17·5) |
| <b>East Timor</b>                     | 40 (37, 43)             | 8·4 (7·8, 9)      | 144 (135, 154)          | 15·7 (14·6, 16·8) |
| <b>Vietnam</b>                        | 5438 (5065, 5820)       | 11·4 (10·6, 12·2) | 23975 (22013, 25861)    | 23·2 (21·5, 25)   |
| <b>Oceania</b>                        | 378 (353, 404)          | 8·4 (7·9, 8·9)    | 1332 (1238, 1422)       | 13·5 (12·7, 14·4) |
| <b>American Samoa</b>                 | 3 (3, 4)                | 9·8 (9·1, 10·4)   | 8 (7, 9)                | 15·5 (14·3, 16·7) |
| <b>Federated States of Micronesia</b> | 7 (6, 7)                | 9·6 (8·9, 10·2)   | 14 (13, 15)             | 15·3 (14·3, 16·4) |
| <b>Fiji</b>                           | 46 (43, 50)             | 8 (7·5, 8·5)      | 131 (123, 141)          | 14·7 (13·9, 15·8) |
| <b>Guam</b>                           | 13 (12, 14)             | 11·6 (10·8, 12·3) | 31 (29, 34)             | 17·3 (16·1, 18·5) |
| <b>Kiribati</b>                       | 5 (4, 5)                | 8·8 (8·2, 9·3)    | 13 (12, 14)             | 14 (13·1, 15)     |
| <b>Marshall Islands</b>               | 3 (2, 3)                | 9·5 (8·9, 10·1)   | 7 (7, 8)                | 15 (14·1, 16)     |
| <b>Northern Mariana Islands</b>       | 5 (4, 5)                | 12·3 (11·5, 13·1) | 10 (10, 11)             | 18 (16·8, 19·3)   |
| <b>Papua New Guinea</b>               | 223 (208, 240)          | 7·9 (7·4, 8·5)    | 896 (828, 960)          | 12·9 (12, 13·8)   |
| <b>Samoa</b>                          | 12 (11, 13)             | 10·6 (10, 11·3)   | 28 (26, 30)             | 17·3 (16·2, 18·4) |
| <b>Solomon Islands</b>                | 19 (18, 20)             | 8·9 (8·3, 9·5)    | 69 (64, 74)             | 14·5 (13·6, 15·4) |
| <b>Tonga</b>                          | 7 (7, 8)                | 10·6 (10, 11·3)   | 16 (15, 17)             | 17·8 (16·6, 19·1) |
| <b>Vanuatu</b>                        | 10 (9, 11)              | 10 (9·3, 10·6)    | 33 (31, 35)             | 15 (14, 16·1)     |
| <b>North Africa and Middle East</b>   | 108100 (100819, 115152) | 48·9 (45·6, 52·2) | 291557 (272067, 309328) | 57·7 (53·9, 61·4) |
| <b>Afghanistan</b>                    | 3448 (3261, 3643)       | 44·7 (42·4, 47)   | 8402 (7896, 8948)       | 51·3 (48·6, 54·2) |
| <b>Algeria</b>                        | 8201 (7786, 8632)       | 52 (49·6, 54·8)   | 23715 (22557, 24940)    | 64·5 (61·3, 67·8) |
| <b>Bahrain</b>                        | 177 (168, 187)          | 55·3 (52·7, 58·1) | 967 (912, 1025)         | 66·1 (62·8, 69·6) |
| <b>Egypt</b>                          | 28227 (25215, 31412)    | 79 (70·1, 87·8)   | 57722 (51379, 63868)    | 79·1 (70·4, 87·4) |
| <b>Iran</b>                           | 17915 (16880, 19012)    | 47·9 (45·5, 50·6) | 48896 (46322, 51596)    | 60·8 (57·6, 64)   |
| <b>Iraq</b>                           | 4746 (4496, 5017)       | 46·4 (44·1, 48·9) | 15763 (14906, 16652)    | 51·8 (49·2, 54·5) |

|                                    |                      |                   |                         |                    |
|------------------------------------|----------------------|-------------------|-------------------------|--------------------|
| <b>Jordan</b>                      | 1095 (1033, 1160)    | 53 (50.2, 55.9)   | 5354 (5043, 5664)       | 67.5 (63.9, 71.1)  |
| <b>Kuwait</b>                      | 569 (537, 603)       | 48 (45.7, 50.5)   | 2443 (2290, 2591)       | 65.5 (62.1, 69.2)  |
| <b>Lebanon</b>                     | 1356 (1286, 1429)    | 49.5 (47, 52)     | 4510 (4290, 4754)       | 65.3 (62, 69)      |
| <b>Libya</b>                       | 1299 (1233, 1371)    | 52.2 (49.6, 55)   | 3723 (3530, 3936)       | 64.9 (61.4, 68.3)  |
| <b>Morocco</b>                     | 8372 (7975, 8816)    | 48 (45.7, 50.6)   | 20726 (19600, 21843)    | 60.2 (57.1, 63.5)  |
| <b>Palestine</b>                   | 580 (549, 611)       | 51.2 (48.7, 53.8) | 2012 (1910, 2125)       | 62 (58.9, 65.3)    |
| <b>Oman</b>                        | 596 (565, 627)       | 55.1 (52.3, 57.9) | 2270 (2144, 2398)       | 66.9 (63.6, 70.4)  |
| <b>Qatar</b>                       | 161 (151, 172)       | 57.9 (54.8, 61.4) | 1565 (1470, 1665)       | 71.7 (67.9, 75.9)  |
| <b>Saudi Arabia</b>                | 7158 (6588, 7715)    | 79.9 (73.4, 86.2) | 25301 (23103, 27369)    | 95.8 (87.8, 103.5) |
| <b>Sudan</b>                       | 6015 (5703, 6353)    | 50.3 (47.8, 52.9) | 14419 (13673, 15182)    | 60 (57, 63.4)      |
| <b>Syria</b>                       | 3543 (3369, 3735)    | 49.5 (47.2, 52.1) | 9495 (8974, 10021)      | 63.5 (60.3, 66.9)  |
| <b>Tunisia</b>                     | 2532 (2059, 2999)    | 41.7 (33.7, 49.2) | 6442 (5170, 7571)       | 51 (41.1, 59.9)    |
| <b>Turkey</b>                      | 8085 (6956, 9330)    | 19 (16.3, 22)     | 21554 (18429, 24752)    | 24.3 (20.8, 27.8)  |
| <b>United Arab Emirates</b>        | 610 (575, 647)       | 54.7 (51.9, 57.6) | 5978 (5558, 6401)       | 67.3 (63.5, 70.9)  |
| <b>Yemen</b>                       | 3346 (3164, 3529)    | 48.3 (45.8, 50.9) | 10025 (9485, 10599)     | 56.9 (53.7, 60.1)  |
| <b>South Asia</b>                  | 66134 (61375, 70786) | 8 (7.5, 8.6)      | 158235 (146704, 169217) | 9.7 (9.1, 10.4)    |
| <b>Bangladesh</b>                  | 7082 (6569, 7571)    | 10 (9.4, 10.6)    | 16743 (15692, 17801)    | 11.6 (10.9, 12.3)  |
| <b>Bhutan</b>                      | 38 (35, 41)          | 10.1 (9.5, 10.8)  | 103 (95, 110)           | 12 (11.3, 12.8)    |
| <b>India</b>                       | 44667 (41431, 47892) | 6.7 (6.2, 7.1)    | 105478 (97726, 112974)  | 8.2 (7.6, 8.8)     |
| <b>Nepal</b>                       | 650 (544, 760)       | 4.8 (4, 5.6)      | 1392 (1173, 1618)       | 5.4 (4.5, 6.2)     |
| <b>Pakistan</b>                    | 13698 (12309, 15090) | 18.8 (16.9, 20.7) | 34520 (31322, 37873)    | 21.6 (19.6, 23.6)  |
| <b>Southern sub-Saharan Africa</b> | 6619 (6144, 7066)    | 18.8 (17.6, 20.1) | 11467 (10668, 12250)    | 17.2 (16.1, 18.3)  |
| <b>Botswana</b>                    | 132 (118, 146)       | 17.1 (15.4, 18.8) | 357 (320, 393)          | 19.4 (17.4, 21.3)  |
| <b>Lesotho</b>                     | 203 (182, 223)       | 16.9 (15.2, 18.7) | 261 (234, 288)          | 17.5 (15.8, 19.3)  |
| <b>Namibia</b>                     | 129 (116, 141)       | 14.4 (13, 15.8)   | 300 (269, 330)          | 17.1 (15.4, 18.7)  |

|                                   |                      |                   |                      |                   |
|-----------------------------------|----------------------|-------------------|----------------------|-------------------|
| <b>South Africa</b>               | 4987 (4671, 5300)    | 19 (17.8, 20.2)   | 8576 (8032, 9099)    | 16.7 (15.7, 17.7) |
| <b>Swaziland</b>                  | 73 (65, 81)          | 17.3 (15.6, 19.1) | 142 (127, 156)       | 18.6 (16.8, 20.4) |
| <b>Zimbabwe</b>                   | 1096 (990, 1211)     | 19.6 (17.8, 21.6) | 1832 (1640, 2011)    | 19.6 (17.6, 21.5) |
| <b>Western sub-Saharan Africa</b> | 18545 (16352, 20795) | 16.6 (14.7, 18.6) | 42619 (37503, 47839) | 17.4 (15.4, 19.5) |
| <b>Benin</b>                      | 426 (376, 476)       | 16.9 (15, 18.9)   | 1157 (1013, 1306)    | 18.2 (16.1, 20.5) |
| <b>Burkina Faso</b>               | 952 (841, 1078)      | 17.7 (15.7, 20)   | 2223 (1949, 2498)    | 19 (16.7, 21.4)   |
| <b>Cameroon</b>                   | 935 (819, 1059)      | 16.1 (14.2, 18.1) | 2684 (2348, 3029)    | 17 (15, 19.1)     |
| <b>Cape Verde</b>                 | 39 (35, 44)          | 17.5 (15.6, 19.7) | 97 (85, 109)         | 20.4 (18.1, 23)   |
| <b>Chad</b>                       | 588 (521, 657)       | 17.4 (15.4, 19.6) | 1273 (1107, 1440)    | 17.4 (15.4, 19.7) |
| <b>Côte d'Ivoire</b>              | 971 (848, 1094)      | 15.7 (13.9, 17.6) | 2502 (2194, 2810)    | 16.9 (15, 19.1)   |
| <b>The Gambia</b>                 | 85 (75, 96)          | 17 (15, 19.1)     | 229 (201, 260)       | 18.7 (16.6, 21.2) |
| <b>Ghana</b>                      | 1332 (1163, 1491)    | 15.5 (13.7, 17.4) | 3572 (3137, 4012)    | 17.5 (15.5, 19.6) |
| <b>Guinea</b>                     | 655 (577, 733)       | 16.8 (14.8, 18.9) | 1159 (1009, 1306)    | 17.1 (15.1, 19.4) |
| <b>Guinea-Bissau</b>              | 85 (75, 96)          | 15.9 (14.1, 17.9) | 159 (139, 179)       | 15.6 (13.7, 17.6) |
| <b>Liberia</b>                    | 230 (204, 258)       | 17.8 (15.8, 20.1) | 509 (441, 579)       | 18.2 (15.9, 20.7) |
| <b>Mali</b>                       | 1011 (893, 1142)     | 19.9 (17.6, 22.5) | 2306 (2018, 2592)    | 21.5 (18.9, 24.1) |
| <b>Mauritania</b>                 | 210 (185, 236)       | 17 (15.1, 19.1)   | 467 (412, 526)       | 19 (16.8, 21.3)   |
| <b>Niger</b>                      | 757 (660, 853)       | 18.8 (16.6, 21.2) | 1997 (1744, 2260)    | 19.7 (17.4, 22.3) |
| <b>Nigeria</b>                    | 8832 (7743, 9935)    | 16.1 (14.2, 18.1) | 18934 (16573, 21389) | 16.6 (14.7, 18.6) |
| <b>São Tomé and Príncipe</b>      | 15 (13, 17)          | 20.5 (18.2, 23)   | 29 (26, 33)          | 21.7 (19.3, 24.4) |
| <b>Senegal</b>                    | 668 (593, 751)       | 16.1 (14.3, 18.1) | 1671 (1463, 1882)    | 18.3 (16.2, 20.6) |
| <b>Sierra Leone</b>               | 452 (398, 509)       | 19.4 (17.1, 21.9) | 849 (739, 956)       | 18.6 (16.3, 20.9) |
| <b>Togo</b>                       | 300 (264, 339)       | 16.7 (14.8, 18.8) | 803 (694, 910)       | 16.8 (14.7, 18.9) |
| <b>Eastern sub-Saharan Africa</b> | 36452 (33485, 39326) | 37 (34, 39.9)     | 82950 (75946, 89624) | 39.4 (36.2, 42.6) |
| <b>Burundi</b>                    | 1017 (927, 1106)     | 35.4 (32.2, 38.6) | 2217 (2010, 2415)    | 38.3 (34.9, 41.7) |

|                                   |                      |                   |                      |                   |
|-----------------------------------|----------------------|-------------------|----------------------|-------------------|
| <b>Comoros</b>                    | 100 (91, 109)        | 39 (35.6, 42.5)   | 237 (216, 258)       | 43.7 (40.1, 47.6) |
| <b>Djibouti</b>                   | 92 (84, 101)         | 38.5 (35.2, 41.9) | 344 (311, 377)       | 43.5 (39.6, 47.4) |
| <b>Eritrea</b>                    | 481 (434, 525)       | 34.9 (31.9, 37.9) | 1274 (1162, 1381)    | 38.7 (35.5, 42)   |
| <b>Ethiopia</b>                   | 10904 (10128, 11651) | 41.4 (38.6, 44.1) | 23113 (21469, 24712) | 43.1 (40.2, 46)   |
| <b>Kenya</b>                      | 2620 (2326, 2938)    | 24.4 (21.5, 27.3) | 7431 (6546, 8275)    | 26.6 (23.5, 29.6) |
| <b>Madagascar</b>                 | 2513 (2294, 2732)    | 38.5 (35.1, 42)   | 6125 (5575, 6663)    | 42.1 (38.4, 45.8) |
| <b>Malawi</b>                     | 2011 (1833, 2182)    | 39.2 (35.7, 42.8) | 3941 (3601, 4263)    | 42.1 (38.3, 45.9) |
| <b>Mozambique</b>                 | 2541 (2300, 2771)    | 31.8 (29, 34.6)   | 5671 (5168, 6188)    | 37.8 (34.5, 41.2) |
| <b>Rwanda</b>                     | 2141 (1896, 2364)    | 56.8 (50.4, 62.8) | 4141 (3694, 4549)    | 55.2 (49.2, 60.9) |
| <b>Somalia</b>                    | 1370 (1238, 1494)    | 36.3 (33.1, 39.5) | 3458 (3138, 3775)    | 39.4 (35.8, 42.9) |
| <b>South Sudan</b>                | 1268 (1147, 1389)    | 40 (36.4, 43.4)   | 2186 (1973, 2388)    | 41.9 (38.1, 45.5) |
| <b>Tanzania</b>                   | 4994 (4540, 5425)    | 36.3 (33, 39.4)   | 12337 (11232, 13447) | 40.5 (37, 44)     |
| <b>Uganda</b>                     | 2915 (2647, 3184)    | 34.5 (31.2, 37.6) | 6997 (6371, 7641)    | 37.7 (34.4, 41.1) |
| <b>Zambia</b>                     | 1464 (1330, 1591)    | 38.4 (35, 41.9)   | 3426 (3122, 3729)    | 38.5 (35.2, 41.8) |
| <b>Central sub-Saharan Africa</b> | 9452 (8479, 10390)   | 30.6 (27.6, 33.7) | 24569 (22010, 27135) | 34.4 (31, 37.7)   |
| <b>Angola</b>                     | 1802 (1613, 1987)    | 32 (28.9, 35)     | 5349 (4810, 5922)    | 34.7 (31.3, 38.2) |
| <b>Central African Republic</b>   | 405 (363, 447)       | 25.6 (23.1, 28.2) | 823 (734, 911)       | 27.9 (25.2, 30.7) |
| <b>Congo</b>                      | 376 (337, 412)       | 26.9 (24.2, 29.6) | 1045 (938, 1161)     | 30.3 (27.4, 33.5) |
| <b>DR Congo</b>                   | 6602 (5926, 7257)    | 30.9 (27.9, 34.2) | 16685 (14911, 18470) | 35 (31.6, 38.7)   |
| <b>Equatorial Guinea</b>          | 70 (63, 77)          | 28 (25.3, 30.8)   | 234 (209, 259)       | 33 (29.8, 36.3)   |
| <b>Gabon</b>                      | 199 (180, 219)       | 30.4 (27.5, 33.5) | 432 (390, 475)       | 33.4 (30.1, 36.6) |

**Appendix Table 18: Number of prevalent cases and age-standardised prevalence rates of decompensated cirrhosis due to alcohol-related liver disease per 100 000 in 1990 and 2017 for both sexes by location**

|                                  | 1990                       |                   | 2017                       |                     |
|----------------------------------|----------------------------|-------------------|----------------------------|---------------------|
|                                  | Counts (95% UI)            | Rate (95% UI)     | Counts (95% UI)            | Rate (95% UI)       |
| <b>Global</b>                    | 1126841 (1065993, 1190048) | 25.3 (23.9, 26.7) | 2458059 (2314716, 2610708) | 30 (28.2, 31.8)     |
| <b>High-income North America</b> | 82517 (78419, 87080)       | 25 (23.8, 26.4)   | 153144 (144514, 162150)    | 29.2 (27.6, 30.8)   |
| <b>Canada</b>                    | 8302 (7681, 8914)          | 25.8 (24, 27.7)   | 17244 (15947, 18627)       | 30.9 (28.6, 33.3)   |
| <b>Greenland</b>                 | 9 (9, 10)                  | 19.3 (17.9, 21)   | 18 (16, 19)                | 24.7 (22.8, 26.7)   |
| <b>USA</b>                       | 74204 (70579, 78267)       | 24.9 (23.7, 26.3) | 135879 (128459, 143704)    | 29 (27.4, 30.5)     |
| <b>Australasia</b>               | 2919 (2679, 3171)          | 12.9 (11.8, 14)   | 7066 (6459, 7663)          | 17.9 (16.3, 19.4)   |
| <b>Australia</b>                 | 2435 (2220, 2666)          | 12.9 (11.7, 14.1) | 6043 (5500, 6583)          | 18.1 (16.5, 19.8)   |
| <b>New Zealand</b>               | 484 (453, 518)             | 12.9 (12.1, 13.8) | 1023 (955, 1091)           | 16.5 (15.4, 17.6)   |
| <b>High-income Asia-Pacific</b>  | 93690 (86823, 100843)      | 44.5 (41.3, 47.9) | 152228 (140629, 163935)    | 49.4 (45.5, 53.2)   |
| <b>Brunei</b>                    | 57 (52, 62)                | 36.7 (33.5, 40)   | 216 (194, 238)             | 51 (46.3, 55.9)     |
| <b>Japan</b>                     | 56004 (52685, 59918)       | 32.9 (31, 35.1)   | 79796 (74665, 85282)       | 35.5 (33.1, 37.9)   |
| <b>Singapore</b>                 | 577 (486, 684)             | 19.9 (16.8, 23.5) | 2185 (1827, 2595)          | 30.1 (25.3, 35.6)   |
| <b>South Korea</b>               | 37052 (32401, 41503)       | 97 (85, 108.3)    | 70031 (62621, 77342)       | 84.4 (75.7, 93.1)   |
| <b>Western Europe</b>            | 272481 (258161, 287355)    | 55.1 (52.3, 58.1) | 456368 (429786, 482753)    | 70.6 (66.6, 74.6)   |
| <b>Andorra</b>                   | 37 (35, 39)                | 59.4 (55.7, 63)   | 101 (95, 107)              | 80.8 (75.7, 85.5)   |
| <b>Austria</b>                   | 9606 (9077, 10123)         | 97.3 (92, 102.6)  | 13735 (12946, 14517)       | 103.1 (97.4, 108.6) |
| <b>Belgium</b>                   | 6813 (6163, 7459)          | 52.2 (47, 57.2)   | 13156 (11802, 14452)       | 79.1 (70.7, 86.9)   |
| <b>Cyprus</b>                    | 274 (259, 289)             | 33.4 (31.5, 35.2) | 844 (793, 894)             | 49.6 (46.4, 52.4)   |
| <b>Denmark</b>                   | 3586 (3418, 3769)          | 54.9 (52.2, 57.7) | 7349 (6952, 7771)          | 88.2 (83.3, 93.1)   |
| <b>Finland</b>                   | 2851 (2697, 3002)          | 44.7 (42.5, 47.1) | 6575 (6167, 6953)          | 80.4 (75.7, 85)     |
| <b>France</b>                    | 49647 (46992, 52329)       | 70.2 (66.4, 74.1) | 72919 (68803, 77216)       | 77.5 (73.3, 82.1)   |

|                       |                         |                     |                         |                      |
|-----------------------|-------------------------|---------------------|-------------------------|----------------------|
| <b>Germany</b>        | 74253 (70809, 78177)    | 68.8 (65.6, 72.4)   | 121744 (114772, 128500) | 93.2 (88.2, 98.4)    |
| <b>Greece</b>         | 6171 (5834, 6511)       | 45.2 (42.8, 47.7)   | 11005 (10374, 11623)    | 68.4 (64.5, 72.3)    |
| <b>Iceland</b>        | 77 (68, 86)             | 29.4 (25.8, 33)     | 276 (240, 310)          | 62.5 (54.5, 70.4)    |
| <b>Ireland</b>        | 1313 (1238, 1395)       | 35.6 (33.5, 37.8)   | 4642 (4359, 4935)       | 72.8 (68.3, 77.4)    |
| <b>Israel</b>         | 1507 (1420, 1600)       | 32.4 (30.6, 34.4)   | 5356 (5021, 5710)       | 55.2 (51.7, 58.7)    |
| <b>Italy</b>          | 30306 (27136, 33656)    | 38.7 (34.7, 42.9)   | 39332 (35581, 43251)    | 39.9 (36.1, 43.9)    |
| <b>Luxembourg</b>     | 381 (360, 402)          | 75.8 (71.7, 79.9)   | 939 (879, 1001)         | 112 (105, 119.4)     |
| <b>Malta</b>          | 129 (122, 136)          | 29.9 (28.2, 31.6)   | 313 (294, 333)          | 47.6 (44.7, 50.6)    |
| <b>Netherlands</b>    | 6975 (6628, 7326)       | 38.4 (36.5, 40.4)   | 16878 (15902, 17847)    | 66.7 (63, 70.5)      |
| <b>Norway</b>         | 2277 (2180, 2376)       | 44.3 (42.3, 46.2)   | 4301 (4090, 4504)       | 59 (56.1, 61.8)      |
| <b>Portugal</b>       | 7441 (6929, 7974)       | 58.7 (54.6, 62.7)   | 9990 (9297, 10691)      | 59.8 (55.8, 64.1)    |
| <b>Spain</b>          | 33688 (30503, 36539)    | 68.1 (61.9, 73.8)   | 56601 (51129, 61670)    | 79 (71.4, 86.3)      |
| <b>Sweden</b>         | 4337 (4084, 4586)       | 38.4 (36.1, 40.7)   | 8556 (7975, 9097)       | 60 (56, 63.9)        |
| <b>Switzerland</b>    | 4231 (4028, 4444)       | 47.1 (44.8, 49.4)   | 7938 (7477, 8404)       | 61.4 (57.8, 64.9)    |
| <b>United Kingdom</b> | 26318 (25152, 27610)    | 37.2 (35.5, 39.1)   | 53347 (50786, 56049)    | 58.3 (55.4, 61.2)    |
| <b>Eastern Europe</b> | 103452 (97773, 109203)  | 37.5 (35.5, 39.5)   | 220955 (208345, 233576) | 74.4 (70.2, 78.5)    |
| <b>Belarus</b>        | 4994 (4585, 5399)       | 40.2 (37, 43.5)     | 10436 (9569, 11291)     | 76.4 (70.3, 82.7)    |
| <b>Estonia</b>        | 818 (751, 889)          | 42.7 (39.2, 46.5)   | 1568 (1452, 1689)       | 83.2 (77, 89.7)      |
| <b>Latvia</b>         | 1311 (1206, 1415)       | 38.9 (35.9, 42.1)   | 1990 (1831, 2143)       | 69.9 (64.1, 75.3)    |
| <b>Lithuania</b>      | 1969 (1815, 2118)       | 45.1 (41.5, 48.4)   | 3583 (3289, 3864)       | 86.6 (79.5, 93.8)    |
| <b>Moldova</b>        | 5133 (4677, 5600)       | 106.4 (96.9, 115.7) | 4674 (4257, 5093)       | 88.1 (80.6, 95.9)    |
| <b>Russia</b>         | 61553 (58199, 64943)    | 34 (32.2, 35.8)     | 146611 (138100, 154665) | 71.4 (67.3, 75.2)    |
| <b>Ukraine</b>        | 27675 (26102, 29234)    | 41.1 (38.9, 43.5)   | 52094 (49036, 55323)    | 81.8 (76.8, 86.8)    |
| <b>Central Europe</b> | 119057 (112898, 125159) | 80 (75.9, 84)       | 191787 (180842, 202749) | 108.3 (102.3, 114.5) |
| <b>Albania</b>        | 1290 (1199, 1388)       | 51.5 (47.9, 55.4)   | 3405 (3160, 3639)       | 89.1 (83, 95.2)      |

|                               |                      |                      |                         |                      |
|-------------------------------|----------------------|----------------------|-------------------------|----------------------|
| <b>Bosnia and Herzegovina</b> | 2880 (2671, 3075)    | 60 (55.9, 64)        | 4451 (4106, 4791)       | 83.9 (77.8, 90)      |
| <b>Bulgaria</b>               | 8171 (7679, 8651)    | 67.2 (63.3, 71.1)    | 11671 (10901, 12407)    | 101.1 (94.7, 107.5)  |
| <b>Croatia</b>                | 6182 (5797, 6533)    | 95.3 (89.5, 100.7)   | 6498 (6093, 6902)       | 94.2 (88.7, 99.9)    |
| <b>Czech Republic</b>         | 9190 (8701, 9714)    | 71.1 (67.4, 75.1)    | 16701 (15744, 17622)    | 100.3 (94.9, 105.9)  |
| <b>Hungary</b>                | 17458 (16483, 18403) | 126.9 (119.8, 133.7) | 15563 (14569, 16551)    | 100.2 (94.4, 106.4)  |
| <b>Macedonia</b>              | 1158 (1080, 1240)    | 55.7 (51.9, 59.5)    | 2687 (2487, 2883)       | 86.1 (79.8, 92.2)    |
| <b>Montenegro</b>             | 380 (355, 406)       | 57.2 (53.4, 61)      | 816 (763, 869)          | 91.5 (85.7, 97.4)    |
| <b>Poland</b>                 | 29087 (27423, 30697) | 65.5 (61.7, 69)      | 68449 (64426, 72550)    | 118.3 (111.5, 125.8) |
| <b>Romania</b>                | 27560 (26008, 29087) | 96.3 (91, 101.5)     | 36671 (34319, 38835)    | 118.8 (111.6, 125.4) |
| <b>Serbia</b>                 | 5676 (5262, 6089)    | 47.5 (44.2, 50.8)    | 9211 (8568, 9846)       | 69.7 (65, 74.6)      |
| <b>Slovakia</b>               | 7291 (6888, 7703)    | 123.1 (116.3, 129.9) | 12349 (11574, 13047)    | 151.6 (142.8, 160.4) |
| <b>Slovenia</b>               | 2734 (2574, 2885)    | 110.4 (104.1, 116.4) | 3317 (3105, 3533)       | 98.7 (92.6, 105)     |
| <b>Central Asia</b>           | 22743 (21603, 23954) | 42.2 (40.2, 44.5)    | 58795 (55619, 62148)    | 68 (64.5, 71.7)      |
| <b>Armenia</b>                | 1131 (1070, 1197)    | 35.9 (34, 37.9)      | 2467 (2322, 2614)       | 62.6 (59.1, 66.2)    |
| <b>Azerbaijan</b>             | 2421 (2281, 2566)    | 41.6 (39.2, 44)      | 6956 (6535, 7389)       | 63.9 (60.1, 67.5)    |
| <b>Georgia</b>                | 2835 (2671, 2999)    | 44.5 (42.1, 47)      | 3417 (3216, 3630)       | 66.5 (62.6, 70.3)    |
| <b>Kazakhstan</b>             | 5233 (4942, 5525)    | 35.5 (33.6, 37.5)    | 13329 (12565, 14153)    | 71.3 (67.5, 75.6)    |
| <b>Kyrgyzstan</b>             | 1582 (1493, 1676)    | 47.3 (44.7, 50)      | 3582 (3369, 3807)       | 67 (63.3, 71.2)      |
| <b>Mongolia</b>               | 537 (506, 570)       | 42.5 (40, 45.1)      | 1728 (1620, 1835)       | 59.6 (56.1, 63.2)    |
| <b>Tajikistan</b>             | 1430 (1349, 1514)    | 43.7 (41.2, 46.2)    | 4302 (4026, 4585)       | 64.1 (60, 68)        |
| <b>Turkmenistan</b>           | 1115 (1052, 1182)    | 47.5 (44.8, 50.2)    | 3360 (3166, 3565)       | 72.2 (67.9, 76.4)    |
| <b>Uzbekistan</b>             | 6459 (6097, 6831)    | 48.1 (45.4, 50.8)    | 19655 (18457, 20841)    | 69.6 (65.7, 73.5)    |
| <b>Central Latin America</b>  | 55721 (52826, 58707) | 54.5 (51.7, 57.5)    | 193861 (182519, 205640) | 78.5 (74.1, 83.2)    |
| <b>Colombia</b>               | 7430 (6919, 7968)    | 34.1 (32, 36.5)      | 39220 (36388, 41975)    | 72.9 (67.7, 78)      |
| <b>Costa Rica</b>             | 980 (918, 1047)      | 48.1 (45, 51.2)      | 4317 (4005, 4633)       | 84.8 (78.8, 91)      |



|                             |                      |                   |                        |                   |
|-----------------------------|----------------------|-------------------|------------------------|-------------------|
| <b>El Salvador</b>          | 1384 (1287, 1488)    | 41.6 (38.7, 44.6) | 4139 (3857, 4430)      | 72.8 (67.8, 78)   |
| <b>Guatemala</b>            | 1985 (1843, 2132)    | 43.1 (40.1, 46.2) | 7817 (7239, 8384)      | 65 (60.2, 69.8)   |
| <b>Honduras</b>             | 1031 (956, 1107)     | 41.3 (38.4, 44.3) | 4460 (4133, 4790)      | 66.3 (61.3, 71.3) |
| <b>Mexico</b>               | 36652 (34840, 38548) | 69.9 (66.5, 73.4) | 104569 (99221, 110201) | 84.7 (80.5, 89.2) |
| <b>Nicaragua</b>            | 822 (765, 886)       | 42.7 (39.6, 45.8) | 3679 (3401, 3956)      | 72.2 (66.8, 77.6) |
| <b>Panama</b>               | 630 (588, 672)       | 37 (34.6, 39.4)   | 2929 (2729, 3142)      | 72.8 (67.9, 78.1) |
| <b>Venezuela</b>            | 4806 (4507, 5096)    | 40.3 (37.8, 42.7) | 22732 (21018, 24446)   | 73.7 (68.4, 79.3) |
| <b>Andean Latin America</b> | 5408 (4987, 5855)    | 22.9 (21.1, 24.8) | 24018 (22047, 25921)   | 43 (39.5, 46.5)   |
| <b>Bolivia</b>              | 676 (619, 738)       | 18 (16.5, 19.6)   | 3459 (3161, 3761)      | 37 (33.8, 40.2)   |
| <b>Ecuador</b>              | 1091 (1000, 1192)    | 17.7 (16.2, 19.4) | 5646 (5153, 6165)      | 37 (33.7, 40.4)   |
| <b>Peru</b>                 | 3641 (3354, 3950)    | 26.6 (24.5, 28.8) | 14913 (13697, 16090)   | 47.8 (43.8, 51.5) |
| <b>Caribbean</b>            | 5518 (5202, 5860)    | 19.8 (18.6, 21)   | 16221 (15199, 17218)   | 31.9 (29.9, 33.8) |
| <b>Antigua and Barbuda</b>  | 10 (9, 10)           | 19.3 (17.9, 20.7) | 34 (31, 36)            | 31.4 (29.4, 33.5) |
| <b>The Bahamas</b>          | 44 (41, 47)          | 24 (22.5, 25.5)   | 134 (125, 142)         | 32 (30.1, 34)     |
| <b>Barbados</b>             | 48 (46, 52)          | 18.7 (17.5, 20)   | 135 (126, 144)         | 30.9 (28.9, 32.9) |
| <b>Belize</b>               | 21 (20, 22)          | 20.4 (19.1, 21.7) | 102 (95, 109)          | 33.3 (31.3, 35.5) |
| <b>Bermuda</b>              | 17 (15, 18)          | 24.9 (22.9, 26.9) | 39 (36, 42)            | 36.2 (33.5, 39)   |
| <b>Cuba</b>                 | 1746 (1643, 1862)    | 16.5 (15.5, 17.6) | 5688 (5285, 6076)      | 33.2 (30.8, 35.3) |
| <b>Dominica</b>             | 13 (12, 13)          | 19.5 (18.3, 20.7) | 28 (26, 30)            | 32.8 (30.8, 34.9) |
| <b>Dominican Republic</b>   | 993 (931, 1061)      | 22.8 (21.3, 24.3) | 3398 (3171, 3613)      | 34.8 (32.5, 37.1) |
| <b>Grenada</b>              | 14 (13, 15)          | 21.2 (19.9, 22.6) | 42 (40, 45)            | 31.8 (29.8, 33.9) |
| <b>Guyana</b>               | 114 (107, 121)       | 24.2 (22.8, 25.7) | 207 (194, 222)         | 30 (28.1, 31.9)   |
| <b>Haiti</b>                | 594 (553, 636)       | 15.3 (14.3, 16.4) | 2072 (1929, 2216)      | 25 (23.3, 26.7)   |
| <b>Jamaica</b>              | 275 (259, 292)       | 15.7 (14.7, 16.7) | 865 (807, 921)         | 29.6 (27.6, 31.5) |
| <b>Puerto Rico</b>          | 1156 (1086, 1229)    | 31.7 (29.8, 33.7) | 2020 (1892, 2157)      | 35.6 (33.3, 38)   |

|                                         |                         |                   |                         |                   |
|-----------------------------------------|-------------------------|-------------------|-------------------------|-------------------|
| <b>Saint Lucia</b>                      | 21 (20, 22)             | 22.9 (21.4, 24.4) | 69 (65, 73)             | 32.4 (30.3, 34.4) |
| <b>Saint Vincent and the Grenadines</b> | 14 (13, 14)             | 18.5 (17.4, 19.7) | 40 (37, 44)             | 30 (27.8, 32.3)   |
| <b>Suriname</b>                         | 59 (55, 63)             | 20.6 (19.3, 22)   | 195 (183, 209)          | 31.5 (29.7, 33.7) |
| <b>Trinidad and Tobago</b>              | 170 (160, 182)          | 18.1 (17, 19.4)   | 512 (476, 546)          | 28.6 (26.7, 30.5) |
| <b>Virgin Islands</b>                   | 22 (21, 24)             | 22 (20.7, 23.5)   | 57 (53, 60)             | 34.8 (32.5, 37)   |
| <b>Tropical Latin America</b>           | 17109 (16225, 18063)    | 15.4 (14.6, 16.2) | 42366 (39991, 44976)    | 17.4 (16.4, 18.4) |
| <b>Brazil</b>                           | 16679 (15826, 17610)    | 15.4 (14.6, 16.2) | 40974 (38671, 43525)    | 17.2 (16.2, 18.2) |
| <b>Paraguay</b>                         | 430 (393, 470)          | 16.6 (15.2, 18.1) | 1393 (1276, 1518)       | 23.6 (21.6, 25.7) |
| <b>Southern Latin America</b>           | 18152 (17221, 19113)    | 38 (36, 40)       | 45131 (42664, 47637)    | 58.7 (55.6, 62)   |
| <b>Argentina</b>                        | 11427 (10818, 12040)    | 34.8 (32.9, 36.6) | 28815 (27207, 30517)    | 57.9 (54.6, 61.4) |
| <b>Chile</b>                            | 5804 (5482, 6137)       | 51.9 (49, 55)     | 14190 (13301, 15043)    | 62.6 (58.8, 66.2) |
| <b>Uruguay</b>                          | 920 (867, 973)          | 25.4 (24, 26.9)   | 2124 (1993, 2258)       | 48.1 (45, 51)     |
| <b>East Asia</b>                        | 169813 (158576, 181318) | 15.8 (14.8, 16.9) | 492776 (457805, 528978) | 23.5 (21.9, 25.1) |
| <b>China</b>                            | 162779 (152005, 173766) | 16 (15, 17.1)     | 472369 (438846, 506879) | 23.7 (22.1, 25.3) |
| <b>North Korea</b>                      | 1781 (1598, 2004)       | 9.1 (8.3, 10.2)   | 5455 (4861, 6109)       | 16.7 (15, 18.5)   |
| <b>Taiwan (Province of China)</b>       | 2424 (2157, 2688)       | 13.3 (11.8, 14.8) | 7012 (6236, 7840)       | 19.5 (17.3, 21.6) |
| <b>Southeast Asia</b>                   | 13858 (12574, 15271)    | 4.4 (4, 4.8)      | 49256 (44140, 54832)    | 7.3 (6.6, 8.1)    |
| <b>Cambodia</b>                         | 229 (209, 251)          | 4.1 (3.7, 4.4)    | 1025 (931, 1134)        | 7.7 (7, 8.5)      |
| <b>Indonesia</b>                        | 5534 (5106, 5966)       | 4.4 (4.1, 4.7)    | 11432 (10527, 12381)    | 4.5 (4.2, 4.9)    |
| <b>Laos</b>                             | 120 (109, 132)          | 4.8 (4.3, 5.2)    | 429 (391, 471)          | 8.2 (7.5, 8.9)    |
| <b>Malaysia</b>                         | 446 (358, 547)          | 3.8 (3, 4.6)      | 2308 (1861, 2798)       | 7.9 (6.4, 9.5)    |
| <b>Maldives</b>                         | 5 (5, 6)                | 4.4 (4, 4.8)      | 36 (33, 40)             | 8.8 (7.9, 9.6)    |
| <b>Mauritius</b>                        | 53 (48, 58)             | 5.9 (5.4, 6.5)    | 143 (129, 157)          | 8.4 (7.6, 9.2)    |
| <b>Myanmar</b>                          | 1088 (984, 1208)        | 3.9 (3.5, 4.3)    | 3372 (3049, 3734)       | 6.5 (5.9, 7.2)    |
| <b>Philippines</b>                      | 1008 (916, 1108)        | 2.5 (2.3, 2.8)    | 5744 (5174, 6322)       | 6.6 (6, 7.2)      |

|                                       |                     |                |                      |                   |
|---------------------------------------|---------------------|----------------|----------------------|-------------------|
| <b>Sri Lanka</b>                      | 604 (549, 668)      | 4·5 (4·1, 5)   | 2115 (1917, 2330)    | 8·3 (7·6, 9·1)    |
| <b>Seychelles</b>                     | 3 (2, 3)            | 4·5 (4·1, 5)   | 10 (9, 12)           | 8·7 (7·9, 9·7)    |
| <b>Thailand</b>                       | 2192 (1745, 2715)   | 4·9 (3·9, 6·1) | 8928 (7000, 11066)   | 8·9 (7, 11)       |
| <b>East Timor</b>                     | 17 (15, 19)         | 4 (3·6, 4·4)   | 65 (59, 71)          | 7·4 (6·7, 8·1)    |
| <b>Vietnam</b>                        | 2542 (2311, 2802)   | 5·7 (5·2, 6·3) | 13584 (12256, 14961) | 13·1 (11·9, 14·3) |
| <b>Oceania</b>                        | 207 (192, 223)      | 5 (4·7, 5·4)   | 752 (692, 820)       | 8·1 (7·5, 8·8)    |
| <b>American Samoa</b>                 | 2 (2, 2)            | 5·8 (5·3, 6·4) | 5 (4, 5)             | 9·2 (8·4, 10·1)   |
| <b>Federated States of Micronesia</b> | 3 (3, 4)            | 5·7 (5·2, 6·1) | 8 (7, 9)             | 8·8 (8·1, 9·6)    |
| <b>Fiji</b>                           | 24 (22, 26)         | 4·4 (4·1, 4·8) | 75 (69, 82)          | 8·4 (7·7, 9·2)    |
| <b>Guam</b>                           | 8 (8, 9)            | 7·6 (7, 8·2)   | 21 (19, 23)          | 11·4 (10·5, 12·4) |
| <b>Kiribati</b>                       | 2 (2, 3)            | 4·9 (4·6, 5·3) | 7 (7, 8)             | 7·9 (7·3, 8·6)    |
| <b>Marshall Islands</b>               | 1 (1, 1)            | 5·7 (5·2, 6·1) | 4 (4, 5)             | 9·1 (8·3, 9·8)    |
| <b>Northern Mariana Islands</b>       | 3 (2, 3)            | 7·7 (7·1, 8·4) | 7 (6, 8)             | 11·1 (10·2, 12·1) |
| <b>Papua New Guinea</b>               | 124 (115, 135)      | 4·9 (4·5, 5·3) | 502 (461, 551)       | 7·8 (7·2, 8·5)    |
| <b>Samoa</b>                          | 6 (6, 7)            | 6·3 (5·8, 6·9) | 17 (15, 18)          | 10·4 (9·6, 11·4)  |
| <b>Solomon Islands</b>                | 10 (9, 11)          | 5·2 (4·8, 5·7) | 38 (35, 41)          | 8·6 (7·9, 9·3)    |
| <b>Tonga</b>                          | 4 (4, 4)            | 6 (5·6, 6·5)   | 9 (8, 10)            | 10·3 (9·5, 11·3)  |
| <b>Vanuatu</b>                        | 5 (5, 5)            | 5·6 (5·2, 6·1) | 17 (16, 19)          | 8·3 (7·6, 9)      |
| <b>North Africa and Middle East</b>   | 10543 (9583, 11534) | 5·2 (4·7, 5·7) | 30315 (27543, 33099) | 6·2 (5·6, 6·8)    |
| <b>Afghanistan</b>                    | 394 (357, 433)      | 5·3 (4·8, 5·8) | 829 (747, 913)       | 6 (5·4, 6·5)      |
| <b>Algeria</b>                        | 859 (787, 938)      | 6 (5·5, 6·6)   | 2717 (2476, 2974)    | 7·5 (6·9, 8·2)    |
| <b>Bahrain</b>                        | 21 (19, 23)         | 7·4 (6·7, 8)   | 125 (113, 138)       | 8·4 (7·7, 9·2)    |
| <b>Egypt</b>                          | 1982 (1708, 2271)   | 5·9 (5·1, 6·8) | 4111 (3541, 4725)    | 5·8 (5, 6·7)      |
| <b>Iran</b>                           | 1082 (998, 1169)    | 3·3 (3, 3·5)   | 3335 (3084, 3583)    | 4·1 (3·8, 4·4)    |
| <b>Iraq</b>                           | 499 (458, 543)      | 5·5 (5, 6)     | 1674 (1525, 1832)    | 6 (5·5, 6·5)      |

|                                    |                      |                   |                         |                   |
|------------------------------------|----------------------|-------------------|-------------------------|-------------------|
| <b>Jordan</b>                      | 108 (98, 118)        | 6 (5.5, 6.6)      | 576 (520, 633)          | 7.7 (7, 8.5)      |
| <b>Kuwait</b>                      | 59 (54, 65)          | 5.7 (5.2, 6.2)    | 276 (250, 304)          | 7.8 (7.1, 8.5)    |
| <b>Lebanon</b>                     | 157 (144, 172)       | 6.2 (5.7, 6.7)    | 519 (474, 565)          | 7.9 (7.2, 8.6)    |
| <b>Libya</b>                       | 136 (124, 148)       | 6.1 (5.5, 6.6)    | 416 (379, 457)          | 7.5 (6.9, 8.2)    |
| <b>Morocco</b>                     | 870 (797, 950)       | 5.4 (4.9, 5.9)    | 2296 (2078, 2507)       | 6.7 (6.1, 7.3)    |
| <b>Palestine</b>                   | 57 (52, 61)          | 5.7 (5.2, 6.2)    | 209 (190, 228)          | 7 (6.4, 7.6)      |
| <b>Oman</b>                        | 62 (57, 68)          | 6.5 (5.9, 7.1)    | 257 (233, 283)          | 8.2 (7.5, 8.9)    |
| <b>Qatar</b>                       | 19 (17, 21)          | 7.5 (6.8, 8.2)    | 191 (172, 212)          | 9.4 (8.5, 10.3)   |
| <b>Saudi Arabia</b>                | 488 (429, 558)       | 6.1 (5.3, 7)      | 1829 (1582, 2085)       | 7.2 (6.2, 8.2)    |
| <b>Sudan</b>                       | 686 (627, 751)       | 6.4 (5.8, 6.9)    | 1668 (1513, 1826)       | 7.7 (7, 8.5)      |
| <b>Syria</b>                       | 346 (316, 380)       | 5.5 (5, 6)        | 1046 (950, 1153)        | 7.1 (6.5, 7.8)    |
| <b>Tunisia</b>                     | 532 (450, 620)       | 9.2 (7.8, 10.7)   | 1458 (1246, 1686)       | 11.4 (9.8, 13.2)  |
| <b>Turkey</b>                      | 1751 (1543, 1979)    | 4.3 (3.8, 4.9)    | 4925 (4356, 5535)       | 5.5 (4.9, 6.2)    |
| <b>United Arab Emirates</b>        | 79 (70, 90)          | 8.1 (7.3, 9)      | 794 (707, 894)          | 9 (8.2, 9.9)      |
| <b>Yemen</b>                       | 348 (319, 380)       | 5.7 (5.2, 6.2)    | 1035 (937, 1132)        | 6.6 (5.9, 7.2)    |
| <b>South Asia</b>                  | 83541 (78284, 89395) | 10.7 (10.1, 11.5) | 210476 (197272, 224812) | 13.4 (12.5, 14.3) |
| <b>Bangladesh</b>                  | 6560 (6107, 7057)    | 10.3 (9.6, 11)    | 16885 (15713, 18125)    | 12 (11.2, 12.9)   |
| <b>Bhutan</b>                      | 41 (39, 44)          | 12.2 (11.4, 13)   | 113 (105, 122)          | 14 (13, 15)       |
| <b>India</b>                       | 72516 (68134, 77393) | 11.5 (10.8, 12.2) | 182734 (171481, 195081) | 14.5 (13.6, 15.5) |
| <b>Nepal</b>                       | 2197 (1989, 2414)    | 17.4 (15.8, 19.1) | 5189 (4745, 5647)       | 20.9 (19.1, 22.7) |
| <b>Pakistan</b>                    | 2227 (1845, 2681)    | 3.3 (2.7, 4)      | 5554 (4578, 6713)       | 3.7 (3.1, 4.5)    |
| <b>Southern sub-Saharan Africa</b> | 5092 (4796, 5407)    | 15.1 (14.2, 16)   | 8751 (8208, 9301)       | 13.4 (12.5, 14.2) |
| <b>Botswana</b>                    | 88 (82, 96)          | 12.1 (11.2, 13.1) | 257 (236, 278)          | 14.3 (13.2, 15.5) |
| <b>Lesotho</b>                     | 139 (128, 151)       | 12.1 (11.1, 13.1) | 183 (168, 199)          | 12.7 (11.7, 13.8) |
| <b>Namibia</b>                     | 83 (75, 92)          | 9.8 (8.9, 10.8)   | 234 (215, 254)          | 13.8 (12.6, 14.8) |

|                                   |                      |                   |                      |                   |
|-----------------------------------|----------------------|-------------------|----------------------|-------------------|
| <b>South Africa</b>               | 4005 (3786, 4244)    | 15.8 (14.9, 16.7) | 6766 (6379, 7185)    | 13.3 (12.5, 14.1) |
| <b>Swaziland</b>                  | 48 (44, 52)          | 12.2 (11.2, 13.2) | 90 (82, 97)          | 12.3 (11.3, 13.2) |
| <b>Zimbabwe</b>                   | 728 (670, 790)       | 13.9 (12.8, 15.1) | 1221 (1126, 1326)    | 13.7 (12.6, 14.8) |
| <b>Western sub-Saharan Africa</b> | 22994 (21285, 24794) | 21.1 (19.5, 22.8) | 52634 (48678, 56863) | 22.1 (20.3, 23.8) |
| <b>Benin</b>                      | 453 (417, 492)       | 18.6 (17.1, 20.2) | 1308 (1196, 1428)    | 21.2 (19.4, 23.2) |
| <b>Burkina Faso</b>               | 1118 (1035, 1202)    | 21.4 (19.9, 23)   | 2719 (2496, 2951)    | 23.9 (21.9, 25.8) |
| <b>Cameroon</b>                   | 1036 (954, 1131)     | 18.2 (16.8, 19.9) | 3159 (2904, 3425)    | 20.6 (18.9, 22.3) |
| <b>Cape Verde</b>                 | 41 (38, 45)          | 18.8 (17.4, 20.5) | 112 (103, 121)       | 23.7 (21.8, 25.7) |
| <b>Chad</b>                       | 590 (547, 635)       | 18 (16.7, 19.4)   | 1367 (1255, 1485)    | 19.5 (17.8, 21.2) |
| <b>Côte d'Ivoire</b>              | 1042 (960, 1128)     | 17.5 (16.2, 19)   | 2836 (2611, 3095)    | 19.7 (18, 21.4)   |
| <b>The Gambia</b>                 | 91 (83, 98)          | 18.8 (17.3, 20.3) | 254 (234, 276)       | 21.4 (19.7, 23.3) |
| <b>Ghana</b>                      | 1429 (1315, 1549)    | 17.1 (15.8, 18.5) | 4075 (3753, 4401)    | 20.3 (18.7, 21.9) |
| <b>Guinea</b>                     | 651 (598, 711)       | 17.1 (15.7, 18.7) | 1204 (1101, 1316)    | 18.4 (16.8, 20.1) |
| <b>Guinea-Bissau</b>              | 90 (83, 97)          | 17.5 (16.2, 18.9) | 174 (159, 189)       | 17.7 (16.2, 19.3) |
| <b>Liberia</b>                    | 281 (259, 303)       | 22.2 (20.5, 24)   | 594 (546, 647)       | 21.9 (20.1, 23.7) |
| <b>Mali</b>                       | 887 (818, 959)       | 17.9 (16.5, 19.3) | 2097 (1920, 2283)    | 20.2 (18.5, 22)   |
| <b>Mauritania</b>                 | 184 (170, 199)       | 15.3 (14.1, 16.5) | 425 (391, 462)       | 17.6 (16.2, 19.1) |
| <b>Niger</b>                      | 728 (667, 797)       | 18.8 (17.2, 20.6) | 1977 (1805, 2167)    | 20.3 (18.6, 22.2) |
| <b>Nigeria</b>                    | 12957 (11963, 14045) | 24 (22.1, 26)     | 26919 (24799, 29209) | 24.1 (22.2, 26.1) |
| <b>São Tomé and Príncipe</b>      | 16 (14, 17)          | 22 (20.3, 23.6)   | 34 (31, 37)          | 26 (23.8, 28.2)   |
| <b>Senegal</b>                    | 583 (539, 631)       | 14.6 (13.4, 15.8) | 1521 (1398, 1654)    | 17.1 (15.7, 18.6) |
| <b>Sierra Leone</b>               | 523 (486, 566)       | 23.1 (21.4, 24.9) | 1047 (964, 1139)     | 23.6 (21.6, 25.5) |
| <b>Togo</b>                       | 294 (272, 318)       | 17.1 (15.8, 18.5) | 810 (742, 885)       | 17.2 (15.7, 18.7) |
| <b>Eastern sub-Saharan Africa</b> | 17566 (16289, 18974) | 18.6 (17.3, 20)   | 39434 (36429, 42583) | 19.5 (18, 21)     |
| <b>Burundi</b>                    | 582 (531, 637)       | 21.1 (19.3, 23.1) | 1233 (1128, 1349)    | 22.2 (20.3, 24.3) |

|                                   |                   |                   |                      |                   |
|-----------------------------------|-------------------|-------------------|----------------------|-------------------|
| <b>Comoros</b>                    | 41 (38, 44)       | 16.6 (15.2, 18)   | 96 (88, 105)         | 18.1 (16.6, 19.6) |
| <b>Djibouti</b>                   | 43 (40, 48)       | 19.2 (17.6, 20.8) | 166 (151, 182)       | 21.4 (19.6, 23.4) |
| <b>Eritrea</b>                    | 211 (192, 230)    | 16 (14.7, 17.4)   | 553 (504, 608)       | 17.4 (15.9, 18.9) |
| <b>Ethiopia</b>                   | 3811 (3531, 4100) | 14.9 (13.9, 16)   | 8073 (7464, 8701)    | 15.7 (14.5, 16.8) |
| <b>Kenya</b>                      | 2296 (2131, 2477) | 21.8 (20.2, 23.5) | 6051 (5605, 6518)    | 21.9 (20.4, 23.6) |
| <b>Madagascar</b>                 | 1166 (1071, 1263) | 18.6 (17.1, 20.1) | 2731 (2497, 2976)    | 19.4 (17.9, 21.1) |
| <b>Malawi</b>                     | 874 (801, 944)    | 17.8 (16.3, 19.2) | 1671 (1545, 1815)    | 18.7 (17.2, 20.3) |
| <b>Mozambique</b>                 | 1278 (1163, 1402) | 16.6 (15.1, 18.3) | 2867 (2631, 3126)    | 20.1 (18.3, 21.9) |
| <b>Rwanda</b>                     | 901 (806, 1006)   | 24.7 (22.1, 27.6) | 1659 (1485, 1853)    | 22.4 (20.1, 25)   |
| <b>Somalia</b>                    | 618 (559, 682)    | 17 (15.6, 18.7)   | 1521 (1385, 1672)    | 18.1 (16.5, 19.8) |
| <b>South Sudan</b>                | 611 (560, 668)    | 20.2 (18.5, 22.1) | 1026 (929, 1129)     | 20.6 (18.8, 22.6) |
| <b>Tanzania</b>                   | 2661 (2451, 2889) | 20.1 (18.5, 21.9) | 6254 (5769, 6798)    | 21.3 (19.6, 23.1) |
| <b>Uganda</b>                     | 1774 (1646, 1915) | 22.1 (20.5, 23.9) | 3966 (3658, 4298)    | 22.6 (20.9, 24.5) |
| <b>Zambia</b>                     | 691 (637, 749)    | 19.1 (17.6, 20.7) | 1541 (1413, 1672)    | 18.2 (16.7, 19.7) |
| <b>Central sub-Saharan Africa</b> | 4462 (4093, 4858) | 15 (13.8, 16.3)   | 11726 (10751, 12746) | 16.9 (15.5, 18.3) |
| <b>Angola</b>                     | 835 (763, 915)    | 15.4 (14.1, 16.8) | 2664 (2432, 2902)    | 17.9 (16.4, 19.3) |
| <b>Central African Republic</b>   | 202 (185, 222)    | 13.2 (12.1, 14.4) | 393 (357, 430)       | 13.6 (12.4, 14.9) |
| <b>Congo</b>                      | 191 (176, 207)    | 14.1 (13.1, 15.4) | 523 (477, 572)       | 15.4 (14.1, 16.8) |
| <b>DR Congo</b>                   | 3089 (2826, 3369) | 15 (13.8, 16.4)   | 7801 (7128, 8524)    | 16.8 (15.4, 18.3) |
| <b>Equatorial Guinea</b>          | 34 (31, 38)       | 14.1 (12.9, 15.4) | 124 (114, 136)       | 18.5 (17, 20.1)   |
| <b>Gabon</b>                      | 110 (101, 120)    | 17.2 (15.7, 18.8) | 221 (202, 240)       | 17.3 (15.9, 18.8) |

**Appendix Table 19: Number of prevalent cases and age-standardised prevalence rates of decompensated cirrhosis due to non-alcoholic steatohepatitis (NASH) per 100 000 in 1990 and 2017 for both sexes by location**

|                                  | 1990                    |                   | 2017                    |                   |
|----------------------------------|-------------------------|-------------------|-------------------------|-------------------|
|                                  | Counts (95% UI)         | Rate (95% UI)     | Counts (95% UI)         | Rate (95% UI)     |
| <b>Global</b>                    | 324736 (301647, 349163) | 7·3 (6·8, 7·8)    | 917070 (850423, 986107) | 11·3 (10·4, 12·1) |
| <b>High-income North America</b> | 27379 (25826, 29034)    | 8·3 (7·8, 8·8)    | 58036 (54368, 61702)    | 11 (10·3, 11·7)   |
| <b>Canada</b>                    | 2293 (2071, 2530)       | 7·1 (6·4, 7·9)    | 5209 (4657, 5798)       | 9·3 (8·3, 10·3)   |
| <b>Greenland</b>                 | 3 (2, 3)                | 5·5 (4·9, 6)      | 5 (4, 6)                | 6·9 (6·1, 7·8)    |
| <b>USA</b>                       | 25083 (23722, 26596)    | 8·4 (7·9, 8·9)    | 52821 (49482, 56049)    | 11·2 (10·5, 11·9) |
| <b>Australasia</b>               | 1257 (1143, 1391)       | 5·6 (5, 6·2)      | 3663 (3338, 4025)       | 9·3 (8·4, 10·2)   |
| <b>Australia</b>                 | 1036 (931, 1158)        | 5·5 (4·9, 6·1)    | 3099 (2806, 3441)       | 9·3 (8·4, 10·4)   |
| <b>New Zealand</b>               | 221 (208, 235)          | 5·9 (5·5, 6·3)    | 564 (528, 602)          | 9·1 (8·5, 9·7)    |
| <b>High-income Asia-Pacific</b>  | 19588 (17372, 22097)    | 9·4 (8·3, 10·5)   | 33512 (29493, 37871)    | 10·5 (9·1, 12)    |
| <b>Brunei</b>                    | 9 (8, 10)               | 5·7 (5·1, 6·3)    | 39 (34, 45)             | 9·7 (8·6, 10·9)   |
| <b>Japan</b>                     | 14458 (13123, 15922)    | 8·6 (7·8, 9·4)    | 21593 (19721, 23567)    | 9·3 (8·5, 10·2)   |
| <b>Singapore</b>                 | 61 (50, 76)             | 2·2 (1·8, 2·7)    | 288 (227, 364)          | 4 (3·2, 5·1)      |
| <b>South Korea</b>               | 5059 (3924, 6386)       | 13·6 (10·5, 17·1) | 11591 (8958, 14507)     | 14 (11, 17·3)     |
| <b>Western Europe</b>            | 41878 (37120, 47634)    | 8·5 (7·5, 9·7)    | 93388 (83334, 105134)   | 14·4 (12·8, 16·1) |
| <b>Andorra</b>                   | 5 (4, 6)                | 8·2 (7·2, 9·4)    | 19 (16, 21)             | 14·8 (13, 16·8)   |
| <b>Austria</b>                   | 1294 (1137, 1456)       | 13·1 (11·5, 14·7) | 2409 (2135, 2728)       | 18 (15·9, 20·4)   |
| <b>Belgium</b>                   | 602 (462, 773)          | 4·6 (3·5, 6)      | 1480 (1114, 1883)       | 8·9 (6·7, 11·4)   |
| <b>Cyprus</b>                    | 47 (41, 53)             | 5·7 (5, 6·4)      | 187 (167, 211)          | 11 (9·8, 12·4)    |
| <b>Denmark</b>                   | 495 (434, 562)          | 7·5 (6·6, 8·6)    | 1264 (1116, 1424)       | 15·1 (13·3, 17·1) |
| <b>Finland</b>                   | 530 (467, 596)          | 8·3 (7·3, 9·4)    | 1551 (1380, 1740)       | 18·8 (16·6, 21·2) |
| <b>France</b>                    | 6040 (5271, 6845)       | 8·6 (7·4, 9·8)    | 12710 (11262, 14227)    | 13·4 (11·8, 15·1) |

|                       |                      |                   |                      |                   |
|-----------------------|----------------------|-------------------|----------------------|-------------------|
| <b>Germany</b>        | 10523 (9273, 11793)  | 9·7 (8·5, 10·9)   | 23802 (21150, 26906) | 18·1 (16, 20·4)   |
| <b>Greece</b>         | 1034 (919, 1154)     | 7·6 (6·7, 8·5)    | 2481 (2209, 2769)    | 15·3 (13·6, 17·2) |
| <b>Iceland</b>        | 39 (33, 45)          | 14·7 (12·4, 17·2) | 164 (138, 191)       | 37·2 (31·4, 43·4) |
| <b>Ireland</b>        | 233 (206, 262)       | 6·3 (5·5, 7·1)    | 955 (847, 1071)      | 15 (13·3, 16·9)   |
| <b>Israel</b>         | 391 (349, 439)       | 8·4 (7·5, 9·4)    | 1703 (1524, 1913)    | 17·5 (15·5, 19·6) |
| <b>Italy</b>          | 7300 (5787, 10318)   | 9·4 (7·4, 13·4)   | 12246 (10109, 14469) | 12·3 (10, 14·6)   |
| <b>Luxembourg</b>     | 62 (55, 70)          | 12·4 (10·9, 13·9) | 167 (147, 191)       | 20 (17·6, 22·7)   |
| <b>Malta</b>          | 26 (23, 29)          | 6·1 (5·4, 6·8)    | 82 (73, 92)          | 12·4 (10·9, 13·9) |
| <b>Netherlands</b>    | 1232 (1096, 1378)    | 6·8 (6, 7·6)      | 3726 (3330, 4171)    | 14·6 (13, 16·5)   |
| <b>Norway</b>         | 421 (393, 450)       | 8·1 (7·6, 8·8)    | 934 (869, 999)       | 12·8 (11·9, 13·7) |
| <b>Portugal</b>       | 1056 (922, 1212)     | 8·4 (7·3, 9·6)    | 2159 (1918, 2438)    | 12·8 (11·3, 14·6) |
| <b>Spain</b>          | 4345 (3747, 5014)    | 8·9 (7·6, 10·3)   | 9951 (8592, 11537)   | 14 (12·1, 16·3)   |
| <b>Sweden</b>         | 795 (724, 873)       | 7·1 (6·4, 7·8)    | 1971 (1799, 2164)    | 14 (12·7, 15·4)   |
| <b>Switzerland</b>    | 609 (542, 686)       | 6·8 (6, 7·7)      | 1470 (1295, 1670)    | 11·3 (10, 12·8)   |
| <b>United Kingdom</b> | 4761 (4401, 5129)    | 6·7 (6·2, 7·3)    | 11858 (10913, 12821) | 12·9 (11·9, 14)   |
| <b>Eastern Europe</b> | 27219 (25697, 28734) | 10 (9·5, 10·6)    | 62994 (59357, 66926) | 21·5 (20·3, 22·9) |
| <b>Belarus</b>        | 1122 (1024, 1225)    | 9·2 (8·3, 10)     | 2593 (2367, 2841)    | 19·3 (17·5, 21·1) |
| <b>Estonia</b>        | 197 (180, 215)       | 10·4 (9·5, 11·4)  | 369 (338, 403)       | 19·7 (18, 21·6)   |
| <b>Latvia</b>         | 325 (296, 357)       | 9·8 (8·9, 10·7)   | 529 (483, 579)       | 18·7 (16·9, 20·6) |
| <b>Lithuania</b>      | 463 (423, 504)       | 10·7 (9·8, 11·7)  | 883 (804, 969)       | 21·4 (19·4, 23·5) |
| <b>Moldova</b>        | 1271 (1148, 1404)    | 26·4 (23·9, 29·2) | 1356 (1233, 1484)    | 25·8 (23·4, 28·2) |
| <b>Russia</b>         | 16771 (15869, 17697) | 9·4 (8·9, 10)     | 42962 (40464, 45546) | 21·3 (20, 22·6)   |
| <b>Ukraine</b>        | 7070 (6664, 7481)    | 10·7 (10·1, 11·3) | 14301 (13446, 15229) | 22·8 (21·4, 24·3) |
| <b>Central Europe</b> | 18009 (16659, 19492) | 12·2 (11·3, 13·3) | 33800 (31196, 36546) | 19·4 (17·9, 21)   |
| <b>Albania</b>        | 262 (237, 288)       | 10·3 (9·3, 11·3)  | 740 (668, 812)       | 19·6 (17·8, 21·6) |



|                               |                      |                   |                      |                   |
|-------------------------------|----------------------|-------------------|----------------------|-------------------|
| <b>Bosnia and Herzegovina</b> | 549 (497, 604)       | 11.5 (10.4, 12.6) | 1075 (982, 1175)     | 20.6 (18.9, 22.5) |
| <b>Bulgaria</b>               | 1283 (1179, 1403)    | 10.8 (9.9, 11.8)  | 1989 (1823, 2163)    | 17.6 (16.1, 19.2) |
| <b>Croatia</b>                | 950 (871, 1034)      | 14.8 (13.6, 16.1) | 1195 (1098, 1303)    | 17.6 (16.1, 19.2) |
| <b>Czech Republic</b>         | 1338 (1234, 1455)    | 10.5 (9.6, 11.4)  | 2691 (2474, 2931)    | 16.5 (15.1, 18)   |
| <b>Hungary</b>                | 2659 (2408, 2947)    | 19.5 (17.6, 21.6) | 2756 (2527, 3004)    | 18.1 (16.6, 19.7) |
| <b>Macedonia</b>              | 228 (209, 249)       | 11 (10.1, 12)     | 647 (589, 709)       | 21 (19.2, 23.1)   |
| <b>Montenegro</b>             | 70 (64, 77)          | 10.6 (9.8, 11.6)  | 157 (143, 171)       | 17.9 (16.4, 19.6) |
| <b>Poland</b>                 | 4297 (3940, 4654)    | 9.8 (9, 10.6)     | 11496 (10573, 12449) | 20.3 (18.6, 22)   |
| <b>Romania</b>                | 3874 (3550, 4215)    | 13.7 (12.6, 14.8) | 6530 (5961, 7140)    | 21.5 (19.8, 23.4) |
| <b>Serbia</b>                 | 1032 (935, 1123)     | 8.7 (7.9, 9.5)    | 1811 (1657, 1972)    | 13.9 (12.7, 15.2) |
| <b>Slovakia</b>               | 1061 (971, 1158)     | 18.1 (16.5, 19.7) | 2052 (1878, 2235)    | 25.7 (23.5, 28.1) |
| <b>Slovenia</b>               | 405 (374, 441)       | 16.5 (15.2, 17.9) | 660 (604, 723)       | 19.9 (18.3, 21.7) |
| <b>Central Asia</b>           | 4732 (4379, 5115)    | 8.7 (8.1, 9.4)    | 13855 (12772, 15060) | 16.2 (15, 17.5)   |
| <b>Armenia</b>                | 245 (225, 266)       | 7.9 (7.3, 8.5)    | 626 (576, 679)       | 16.1 (14.8, 17.4) |
| <b>Azerbaijan</b>             | 519 (478, 562)       | 8.9 (8.3, 9.6)    | 1809 (1643, 1991)    | 17 (15.5, 18.5)   |
| <b>Georgia</b>                | 585 (536, 641)       | 9.3 (8.5, 10.1)   | 826 (755, 902)       | 16.2 (14.8, 17.6) |
| <b>Kazakhstan</b>             | 1069 (982, 1163)     | 7.3 (6.7, 7.9)    | 2891 (2654, 3143)    | 15.7 (14.5, 17.1) |
| <b>Kyrgyzstan</b>             | 327 (302, 354)       | 9.7 (8.9, 10.5)   | 833 (760, 910)       | 15.7 (14.4, 17.2) |
| <b>Mongolia</b>               | 112 (103, 121)       | 8.6 (7.9, 9.3)    | 373 (341, 409)       | 13.1 (12.1, 14.3) |
| <b>Tajikistan</b>             | 277 (254, 301)       | 8.2 (7.6, 8.9)    | 936 (851, 1036)      | 13.9 (12.8, 15.3) |
| <b>Turkmenistan</b>           | 232 (213, 251)       | 9.7 (9, 10.5)     | 824 (757, 903)       | 18 (16.5, 19.5)   |
| <b>Uzbekistan</b>             | 1365 (1256, 1477)    | 10 (9.2, 10.8)    | 4737 (4341, 5169)    | 17 (15.6, 18.4)   |
| <b>Central Latin America</b>  | 17291 (15920, 18807) | 17 (15.7, 18.4)   | 73489 (67250, 80088) | 30 (27.5, 32.6)   |
| <b>Colombia</b>               | 1844 (1640, 2075)    | 8.6 (7.6, 9.6)    | 12141 (10886, 13655) | 22.5 (20.2, 25.3) |
| <b>Costa Rica</b>             | 262 (234, 291)       | 12.9 (11.6, 14.3) | 1464 (1315, 1632)    | 28.9 (26, 32.1)   |

|                             |                      |                   |                      |                   |
|-----------------------------|----------------------|-------------------|----------------------|-------------------|
| <b>El Salvador</b>          | 449 (403, 503)       | 13.5 (12.1, 15.1) | 1689 (1520, 1876)    | 29.7 (26.7, 33)   |
| <b>Guatemala</b>            | 661 (584, 744)       | 14.5 (12.9, 16.2) | 3315 (2959, 3715)    | 28 (24.9, 31.3)   |
| <b>Honduras</b>             | 362 (320, 409)       | 14.6 (12.9, 16.4) | 1901 (1689, 2124)    | 28.7 (25.6, 31.9) |
| <b>Mexico</b>               | 11783 (10961, 12710) | 22.6 (21.1, 24.3) | 41162 (38227, 44253) | 33.6 (31.3, 36)   |
| <b>Nicaragua</b>            | 284 (255, 315)       | 14.8 (13.4, 16.4) | 1682 (1509, 1872)    | 33.5 (30.1, 37.1) |
| <b>Panama</b>               | 176 (157, 197)       | 10.4 (9.3, 11.7)  | 920 (802, 1047)      | 22.9 (20, 26.1)   |
| <b>Venezuela</b>            | 1471 (1321, 1632)    | 12.5 (11.2, 13.8) | 9214 (8248, 10265)   | 30.4 (27.3, 33.7) |
| <b>Andean Latin America</b> | 2409 (2215, 2628)    | 10.3 (9.5, 11.2)  | 14607 (13472, 15790) | 26.3 (24.2, 28.5) |
| <b>Bolivia</b>              | 328 (300, 358)       | 8.9 (8.1, 9.7)    | 2216 (2036, 2408)    | 24 (22, 26)       |
| <b>Ecuador</b>              | 731 (670, 801)       | 11.9 (10.9, 13)   | 4630 (4246, 5038)    | 30.5 (28, 33.2)   |
| <b>Peru</b>                 | 1350 (1238, 1482)    | 9.9 (9.1, 10.9)   | 7761 (7143, 8446)    | 24.9 (22.9, 27.1) |
| <b>Caribbean</b>            | 2833 (2624, 3055)    | 10.2 (9.5, 11)    | 9883 (9086, 10728)   | 19.4 (17.9, 21)   |
| <b>Antigua and Barbuda</b>  | 6 (5, 6)             | 11.5 (10.6, 12.5) | 23 (21, 25)          | 22.1 (20.4, 23.9) |
| <b>The Bahamas</b>          | 19 (18, 21)          | 10.9 (10, 11.8)   | 75 (69, 82)          | 18.4 (17, 19.9)   |
| <b>Barbados</b>             | 30 (27, 32)          | 11.2 (10.2, 12.2) | 96 (88, 104)         | 21.7 (20, 23.5)   |
| <b>Belize</b>               | 11 (10, 12)          | 10.6 (9.9, 11.5)  | 64 (59, 70)          | 21.3 (19.7, 23.1) |
| <b>Bermuda</b>              | 8 (7, 9)             | 12.3 (11.1, 13.6) | 27 (25, 30)          | 24.6 (22.4, 26.9) |
| <b>Cuba</b>                 | 996 (923, 1071)      | 9.4 (8.7, 10.2)   | 3703 (3397, 4033)    | 21.3 (19.6, 23.1) |
| <b>Dominica</b>             | 6 (6, 7)             | 9.4 (8.7, 10.2)   | 17 (15, 18)          | 19.4 (17.9, 20.9) |
| <b>Dominican Republic</b>   | 448 (413, 488)       | 10.4 (9.6, 11.3)  | 1771 (1620, 1934)    | 18.4 (16.8, 20)   |
| <b>Grenada</b>              | 6 (6, 7)             | 9.6 (8.8, 10.4)   | 25 (23, 27)          | 18.6 (17.1, 20.2) |
| <b>Guyana</b>               | 50 (46, 54)          | 10.9 (10, 11.8)   | 124 (114, 135)       | 18.2 (16.9, 19.8) |
| <b>Haiti</b>                | 245 (217, 275)       | 6.5 (5.8, 7.2)    | 973 (851, 1103)      | 12.2 (10.7, 13.7) |
| <b>Jamaica</b>              | 154 (143, 166)       | 8.7 (8, 9.4)      | 579 (533, 629)       | 19.8 (18.3, 21.5) |
| <b>Puerto Rico</b>          | 602 (556, 648)       | 16.5 (15.2, 17.8) | 1443 (1326, 1562)    | 24.5 (22.5, 26.5) |

|                                         |                      |                   |                         |                   |
|-----------------------------------------|----------------------|-------------------|-------------------------|-------------------|
| <b>Saint Lucia</b>                      | 10 (10, 11)          | 11.3 (10.5, 12.3) | 45 (41, 49)             | 21.1 (19.4, 22.8) |
| <b>Saint Vincent and the Grenadines</b> | 8 (7, 9)             | 10.5 (9.7, 11.5)  | 34 (30, 38)             | 25 (22.4, 27.9)   |
| <b>Suriname</b>                         | 29 (27, 32)          | 10.2 (9.4, 11.1)  | 116 (107, 127)          | 19.1 (17.6, 20.6) |
| <b>Trinidad and Tobago</b>              | 97 (89, 104)         | 10.4 (9.6, 11.3)  | 376 (344, 409)          | 21.1 (19.4, 22.9) |
| <b>Virgin Islands</b>                   | 12 (11, 13)          | 12 (11, 13.1)     | 37 (34, 40)             | 22.2 (20.3, 24)   |
| <b>Tropical Latin America</b>           | 13484 (12648, 14415) | 12.5 (11.7, 13.2) | 43885 (41229, 46777)    | 18.2 (17.1, 19.4) |
| <b>Brazil</b>                           | 13219 (12400, 14119) | 12.5 (11.8, 13.3) | 42797 (40235, 45616)    | 18.2 (17.1, 19.3) |
| <b>Paraguay</b>                         | 265 (238, 296)       | 10.4 (9.3, 11.6)  | 1088 (976, 1215)        | 18.8 (16.9, 20.9) |
| <b>Southern Latin America</b>           | 3684 (3404, 3978)    | 7.7 (7.1, 8.3)    | 12265 (11268, 13216)    | 15.9 (14.6, 17.2) |
| <b>Argentina</b>                        | 2116 (1943, 2295)    | 6.4 (5.9, 7)      | 7290 (6667, 7891)       | 14.6 (13.4, 15.9) |
| <b>Chile</b>                            | 1323 (1221, 1428)    | 11.9 (11, 12.8)   | 4230 (3893, 4589)       | 18.7 (17.2, 20.2) |
| <b>Uruguay</b>                          | 246 (226, 266)       | 6.8 (6.2, 7.3)    | 745 (685, 808)          | 16.6 (15.3, 18)   |
| <b>East Asia</b>                        | 67661 (63310, 72383) | 6.3 (5.9, 6.7)    | 216086 (201093, 231857) | 10.6 (9.9, 11.3)  |
| <b>China</b>                            | 64999 (60858, 69504) | 6.3 (5.9, 6.8)    | 207346 (192968, 222462) | 10.7 (10, 11.4)   |
| <b>North Korea</b>                      | 608 (534, 691)       | 3.2 (2.8, 3.6)    | 2000 (1740, 2286)       | 6.3 (5.5, 7.1)    |
| <b>Taiwan (Province of China)</b>       | 927 (822, 1042)      | 5.1 (4.5, 5.8)    | 3260 (2881, 3686)       | 9.3 (8.2, 10.4)   |
| <b>Southeast Asia</b>                   | 10680 (9793, 11631)  | 3.4 (3.1, 3.7)    | 40846 (36819, 45179)    | 6.3 (5.7, 6.9)    |
| <b>Cambodia</b>                         | 172 (155, 190)       | 3 (2.8, 3.4)      | 712 (630, 797)          | 5.5 (4.9, 6.1)    |
| <b>Indonesia</b>                        | 4795 (4453, 5161)    | 3.8 (3.6, 4.1)    | 11515 (10627, 12441)    | 4.7 (4.4, 5.1)    |
| <b>Laos</b>                             | 66 (59, 73)          | 2.6 (2.4, 2.9)    | 261 (233, 293)          | 5.1 (4.6, 5.7)    |
| <b>Malaysia</b>                         | 302 (262, 344)       | 2.5 (2.2, 2.9)    | 1988 (1735, 2262)       | 6.9 (6.1, 7.8)    |
| <b>Maldives</b>                         | 3 (3, 4)             | 2.9 (2.6, 3.2)    | 31 (27, 35)             | 7.9 (7.1, 8.9)    |
| <b>Mauritius</b>                        | 33 (29, 37)          | 3.7 (3.3, 4.1)    | 129 (114, 143)          | 7.7 (6.9, 8.6)    |
| <b>Myanmar</b>                          | 780 (699, 868)       | 2.8 (2.5, 3.1)    | 2851 (2552, 3183)       | 5.7 (5.1, 6.3)    |
| <b>Philippines</b>                      | 578 (517, 643)       | 1.4 (1.3, 1.6)    | 3820 (3424, 4256)       | 4.5 (4.1, 5)      |

|                                       |                      |                   |                        |                   |
|---------------------------------------|----------------------|-------------------|------------------------|-------------------|
| <b>Sri Lanka</b>                      | 418 (375, 466)       | 3·2 (2·9, 3·5)    | 1707 (1542, 1893)      | 6·8 (6·1, 7·5)    |
| <b>Seychelles</b>                     | 2 (2, 3)             | 3·9 (3·5, 4·4)    | 11 (10, 13)            | 9·9 (8·6, 11·3)   |
| <b>Thailand</b>                       | 1751 (1510, 1996)    | 4 (3·4, 4·5)      | 9211 (7969, 10506)     | 9·4 (8·2, 10·7)   |
| <b>East Timor</b>                     | 11 (10, 12)          | 2·6 (2·4, 2·9)    | 47 (42, 53)            | 5·3 (4·7, 5·9)    |
| <b>Vietnam</b>                        | 1754 (1582, 1942)    | 3·9 (3·5, 4·3)    | 8511 (7508, 9671)      | 8·5 (7·6, 9·6)    |
| <b>Oceania</b>                        | 128 (111, 148)       | 3·1 (2·7, 3·6)    | 509 (435, 594)         | 5·6 (4·9, 6·5)    |
| <b>American Samoa</b>                 | 2 (2, 3)             | 6·9 (5·8, 8·2)    | 7 (6, 9)               | 13·9 (11·4, 16·5) |
| <b>Federated States of Micronesia</b> | 3 (2, 3)             | 4 (3·6, 4·5)      | 7 (7, 8)               | 8·3 (7·4, 9·2)    |
| <b>Fiji</b>                           | 17 (15, 19)          | 3·2 (2·8, 3·6)    | 63 (55, 71)            | 7·2 (6·4, 8·1)    |
| <b>Guam</b>                           | 6 (5, 6)             | 5·3 (4·7, 5·9)    | 19 (17, 21)            | 10·1 (9, 11·3)    |
| <b>Kiribati</b>                       | 2 (2, 2)             | 3·9 (3·5, 4·4)    | 7 (6, 8)               | 7·8 (7, 8·7)      |
| <b>Marshall Islands</b>               | 1 (1, 1)             | 4·4 (3·9, 4·9)    | 4 (3, 4)               | 8·6 (7·7, 9·6)    |
| <b>Northern Mariana Islands</b>       | 2 (2, 2)             | 5·9 (5·3, 6·7)    | 6 (5, 7)               | 9·8 (8·7, 10·9)   |
| <b>Papua New Guinea</b>               | 68 (58, 80)          | 2·6 (2·2, 3)      | 298 (249, 356)         | 4·7 (4, 5·5)      |
| <b>Samoa</b>                          | 6 (5, 7)             | 5·6 (4·9, 6·4)    | 17 (15, 20)            | 10·9 (9·6, 12·3)  |
| <b>Solomon Islands</b>                | 7 (6, 8)             | 3·4 (2·9, 3·8)    | 29 (25, 33)            | 6·6 (5·8, 7·4)    |
| <b>Tonga</b>                          | 4 (3, 4)             | 5·9 (5·2, 6·6)    | 11 (9, 12)             | 12·3 (10·7, 14)   |
| <b>Vanuatu</b>                        | 3 (3, 4)             | 3·6 (3·1, 4·1)    | 13 (11, 15)            | 6·2 (5·4, 7·2)    |
| <b>North Africa and Middle East</b>   | 30363 (27577, 33146) | 14·8 (13·5, 16·1) | 109375 (99728, 119573) | 22·8 (20·9, 24·9) |
| <b>Afghanistan</b>                    | 972 (876, 1070)      | 12·9 (11·7, 14·1) | 2253 (1941, 2584)      | 15·7 (13·8, 18)   |
| <b>Algeria</b>                        | 2191 (1984, 2411)    | 14·9 (13·5, 16·4) | 8796 (8022, 9625)      | 24·8 (22·6, 27)   |
| <b>Bahrain</b>                        | 53 (49, 58)          | 19·1 (17·6, 20·6) | 407 (370, 448)         | 30·2 (28, 32·7)   |
| <b>Egypt</b>                          | 6555 (5747, 7553)    | 19·4 (17, 22·2)   | 17897 (15669, 20478)   | 26 (22·8, 29·6)   |
| <b>Iran</b>                           | 3610 (3393, 3832)    | 10·4 (9·8, 11·1)  | 13906 (13022, 14779)   | 17·7 (16·6, 18·7) |
| <b>Iraq</b>                           | 1640 (1523, 1771)    | 17·4 (16·2, 18·8) | 5814 (5331, 6309)      | 20·7 (19, 22·4)   |

|                                    |                      |                   |                      |                   |
|------------------------------------|----------------------|-------------------|----------------------|-------------------|
| <b>Jordan</b>                      | 352 (324, 381)       | 19.1 (17.7, 20.6) | 2377 (2194, 2577)    | 32.5 (30.1, 35)   |
| <b>Kuwait</b>                      | 197 (177, 218)       | 19 (17.2, 20.9)   | 1259 (1121, 1401)    | 36.7 (33.2, 40.5) |
| <b>Lebanon</b>                     | 415 (382, 449)       | 16.1 (14.9, 17.4) | 1882 (1733, 2030)    | 28.7 (26.5, 31)   |
| <b>Libya</b>                       | 465 (427, 503)       | 20.3 (18.6, 21.9) | 1829 (1673, 1994)    | 33.9 (31.4, 36.8) |
| <b>Morocco</b>                     | 2293 (2071, 2515)    | 14 (12.6, 15.3)   | 7806 (7095, 8562)    | 23.2 (21.1, 25.3) |
| <b>Palestine</b>                   | 181 (167, 194)       | 17.3 (16, 18.6)   | 735 (674, 801)       | 24.7 (22.7, 26.8) |
| <b>Oman</b>                        | 150 (137, 165)       | 15.8 (14.5, 17.3) | 914 (837, 996)       | 31.3 (28.9, 33.8) |
| <b>Qatar</b>                       | 64 (54, 75)          | 27.7 (24.2, 31.6) | 697 (611, 788)       | 37.7 (34, 41.5)   |
| <b>Saudi Arabia</b>                | 1387 (1234, 1558)    | 17 (15, 19.2)     | 7278 (6342, 8315)    | 30.1 (26.5, 34)   |
| <b>Sudan</b>                       | 1613 (1461, 1782)    | 14.5 (13.1, 16)   | 4743 (4252, 5251)    | 21.5 (19.2, 23.8) |
| <b>Syria</b>                       | 1071 (987, 1151)     | 16.3 (15.1, 17.6) | 3833 (3531, 4155)    | 26.6 (24.6, 28.7) |
| <b>Tunisia</b>                     | 1392 (1192, 1610)    | 23.8 (20.3, 27.5) | 4729 (4047, 5466)    | 37.7 (32.5, 43.5) |
| <b>Turkey</b>                      | 4802 (4271, 5357)    | 11.9 (10.6, 13.2) | 17210 (15324, 19160) | 19.4 (17.4, 21.6) |
| <b>United Arab Emirates</b>        | 167 (151, 184)       | 18.1 (16.7, 19.6) | 2271 (2017, 2544)    | 29.7 (27.4, 32)   |
| <b>Yemen</b>                       | 771 (678, 873)       | 12.3 (10.8, 13.9) | 2636 (2279, 3035)    | 16.6 (14.3, 19.2) |
| <b>South Asia</b>                  | 15893 (14851, 17036) | 2.1 (1.9, 2.2)    | 45518 (42330, 49120) | 2.9 (2.7, 3.2)    |
| <b>Bangladesh</b>                  | 1543 (1393, 1707)    | 2.4 (2.2, 2.7)    | 4624 (4164, 5132)    | 3.4 (3.1, 3.7)    |
| <b>Bhutan</b>                      | 10 (9, 11)           | 2.9 (2.6, 3.2)    | 32 (29, 36)          | 4.1 (3.7, 4.6)    |
| <b>India</b>                       | 12385 (11637, 13236) | 2 (1.9, 2.1)      | 35256 (32953, 37769) | 2.9 (2.7, 3.1)    |
| <b>Nepal</b>                       | 241 (214, 270)       | 1.9 (1.7, 2.2)    | 692 (619, 777)       | 2.8 (2.5, 3.1)    |
| <b>Pakistan</b>                    | 1714 (1507, 1932)    | 2.5 (2.2, 2.8)    | 4914 (4323, 5559)    | 3.4 (3, 3.8)      |
| <b>Southern sub-Saharan Africa</b> | 2613 (2425, 2819)    | 7.8 (7.2, 8.4)    | 5548 (5096, 6046)    | 8.6 (8, 9.4)      |
| <b>Botswana</b>                    | 41 (37, 45)          | 5.5 (5, 6.2)      | 145 (130, 162)       | 8.3 (7.5, 9.3)    |
| <b>Lesotho</b>                     | 65 (59, 72)          | 5.7 (5.1, 6.3)    | 101 (90, 112)        | 7.1 (6.4, 7.9)    |
| <b>Namibia</b>                     | 37 (32, 42)          | 4.3 (3.8, 4.9)    | 100 (87, 114)        | 5.9 (5.2, 6.8)    |

|                                   |                   |                  |                      |                   |
|-----------------------------------|-------------------|------------------|----------------------|-------------------|
| <b>South Africa</b>               | 2116 (1974, 2270) | 8·4 (7·8, 9)     | 4542 (4205, 4914)    | 9·1 (8·4, 9·8)    |
| <b>Swaziland</b>                  | 27 (24, 30)       | 6·8 (6·1, 7·5)   | 60 (54, 67)          | 8·4 (7·5, 9·2)    |
| <b>Zimbabwe</b>                   | 328 (292, 370)    | 6·2 (5·6, 6·9)   | 601 (526, 692)       | 6·8 (6, 7·8)      |
| <b>Western sub-Saharan Africa</b> | 8675 (7922, 9474) | 8 (7·4, 8·7)     | 23301 (21222, 25498) | 10 (9·1, 10·9)    |
| <b>Benin</b>                      | 201 (183, 219)    | 8·2 (7·5, 9)     | 707 (639, 782)       | 11·6 (10·5, 12·8) |
| <b>Burkina Faso</b>               | 422 (385, 465)    | 8·1 (7·3, 8·9)   | 1158 (1045, 1278)    | 10·3 (9·4, 11·3)  |
| <b>Cameroon</b>                   | 526 (470, 584)    | 9·4 (8·5, 10·4)  | 1736 (1567, 1928)    | 11·6 (10·4, 12·8) |
| <b>Cape Verde</b>                 | 20 (18, 22)       | 8·9 (8·2, 9·7)   | 62 (56, 67)          | 13·3 (12, 14·5)   |
| <b>Chad</b>                       | 258 (234, 282)    | 7·8 (7·1, 8·6)   | 591 (525, 659)       | 8·4 (7·5, 9·4)    |
| <b>Côte d'Ivoire</b>              | 426 (388, 469)    | 7·3 (6·7, 8)     | 1319 (1195, 1457)    | 9·5 (8·6, 10·4)   |
| <b>The Gambia</b>                 | 41 (37, 45)       | 8·5 (7·8, 9·4)   | 129 (118, 141)       | 11 (10·1, 12)     |
| <b>Ghana</b>                      | 587 (533, 645)    | 7·2 (6·5, 7·8)   | 2042 (1854, 2242)    | 10·5 (9·6, 11·5)  |
| <b>Guinea</b>                     | 301 (274, 331)    | 7·9 (7·2, 8·7)   | 588 (532, 652)       | 9 (8·1, 10)       |
| <b>Guinea-Bissau</b>              | 41 (38, 45)       | 8 (7·3, 8·8)     | 96 (87, 106)         | 10 (9·1, 11)      |
| <b>Liberia</b>                    | 120 (109, 132)    | 9·5 (8·6, 10·4)  | 312 (278, 349)       | 11·8 (10·6, 13·1) |
| <b>Mali</b>                       | 436 (396, 478)    | 8·9 (8·1, 9·7)   | 1181 (1066, 1306)    | 11·4 (10·3, 12·5) |
| <b>Mauritania</b>                 | 111 (101, 123)    | 9·3 (8·4, 10·2)  | 320 (285, 358)       | 13·4 (12, 14·9)   |
| <b>Niger</b>                      | 318 (288, 351)    | 8·3 (7·5, 9·1)   | 951 (852, 1060)      | 9·8 (8·8, 10·9)   |
| <b>Nigeria</b>                    | 4194 (3818, 4601) | 7·9 (7·2, 8·6)   | 10303 (9348, 11326)  | 9·4 (8·6, 10·4)   |
| <b>São Tomé and Príncipe</b>      | 8 (7, 8)          | 10·6 (9·6, 11·6) | 17 (15, 18)          | 13·1 (12, 14·3)   |
| <b>Senegal</b>                    | 323 (296, 354)    | 8·1 (7·4, 8·8)   | 925 (841, 1020)      | 10·5 (9·5, 11·5)  |
| <b>Sierra Leone</b>               | 211 (193, 232)    | 9·3 (8·5, 10·2)  | 442 (400, 487)       | 10·1 (9·2, 11·1)  |
| <b>Togo</b>                       | 131 (119, 144)    | 7·7 (7, 8·5)     | 423 (381, 469)       | 9·3 (8·5, 10·3)   |
| <b>Eastern sub-Saharan Africa</b> | 7024 (6491, 7599) | 7·6 (7, 8·2)     | 17295 (15976, 18707) | 8·8 (8·1, 9·5)    |
| <b>Burundi</b>                    | 194 (177, 213)    | 7·3 (6·7, 8)     | 414 (373, 458)       | 7·7 (7, 8·6)      |

|                                   |                   |                 |                   |                  |
|-----------------------------------|-------------------|-----------------|-------------------|------------------|
| <b>Comoros</b>                    | 20 (18, 22)       | 8·3 (7·5, 9·1)  | 51 (46, 56)       | 9·9 (9, 10·9)    |
| <b>Djibouti</b>                   | 17 (16, 19)       | 8·1 (7·4, 8·8)  | 86 (76, 97)       | 11·7 (10·5, 13)  |
| <b>Eritrea</b>                    | 85 (76, 94)       | 6·8 (6·2, 7·5)  | 236 (212, 262)    | 7·9 (7·1, 8·8)   |
| <b>Ethiopia</b>                   | 1600 (1492, 1712) | 6·4 (6, 6·8)    | 3613 (3376, 3856) | 7·1 (6·6, 7·6)   |
| <b>Kenya</b>                      | 984 (916, 1058)   | 9·5 (8·8, 10·2) | 2888 (2676, 3128) | 10·8 (10, 11·6)  |
| <b>Madagascar</b>                 | 461 (419, 508)    | 7·4 (6·8, 8·2)  | 1135 (1021, 1267) | 8·4 (7·6, 9·3)   |
| <b>Malawi</b>                     | 409 (373, 448)    | 8·5 (7·7, 9·2)  | 861 (786, 938)    | 9·8 (8·9, 10·7)  |
| <b>Mozambique</b>                 | 530 (481, 580)    | 7·1 (6·4, 7·7)  | 1252 (1139, 1378) | 9 (8·2, 9·9)     |
| <b>Rwanda</b>                     | 277 (245, 311)    | 7·8 (6·8, 8·7)  | 588 (524, 662)    | 8·3 (7·3, 9·3)   |
| <b>Somalia</b>                    | 263 (238, 291)    | 7·6 (6·9, 8·3)  | 693 (628, 765)    | 8·5 (7·8, 9·4)   |
| <b>South Sudan</b>                | 280 (251, 312)    | 9·4 (8·5, 10·5) | 508 (455, 568)    | 10·4 (9·4, 11·6) |
| <b>Tanzania</b>                   | 1041 (948, 1140)  | 8 (7·3, 8·7)    | 2800 (2553, 3070) | 9·8 (8·9, 10·7)  |
| <b>Uganda</b>                     | 564 (517, 618)    | 7·1 (6·5, 7·8)  | 1438 (1308, 1579) | 8·4 (7·6, 9·2)   |
| <b>Zambia</b>                     | 296 (269, 323)    | 8·3 (7·6, 9·1)  | 722 (658, 792)    | 8·8 (8, 9·7)     |
| <b>Central sub-Saharan Africa</b> | 1936 (1759, 2122) | 6·6 (6, 7·2)    | 5214 (4621, 5857) | 7·7 (6·9, 8·6)   |
| <b>Angola</b>                     | 368 (333, 407)    | 6·9 (6·3, 7·6)  | 1358 (1227, 1503) | 9·3 (8·5, 10·2)  |
| <b>Central African Republic</b>   | 80 (72, 89)       | 5·4 (4·8, 5·9)  | 162 (142, 184)    | 5·8 (5·1, 6·6)   |
| <b>Congo</b>                      | 80 (73, 88)       | 6 (5·5, 6·6)    | 243 (219, 270)    | 7·4 (6·7, 8·2)   |
| <b>DR Congo</b>                   | 1347 (1223, 1482) | 6·6 (6, 7·2)    | 3249 (2852, 3702) | 7·2 (6·4, 8·1)   |
| <b>Equatorial Guinea</b>          | 16 (14, 18)       | 6·6 (6, 7·3)    | 84 (71, 99)       | 12·9 (11, 15·3)  |
| <b>Gabon</b>                      | 45 (41, 49)       | 7·1 (6·4, 7·8)  | 119 (107, 133)    | 9·6 (8·6, 10·6)  |

**Appendix Table 20: Number of prevalent cases and age-standardised prevalence rates of decompensated cirrhosis due to other causes per 100 000 in 1990 and 2017 for both sexes by location**

|                                  | 1990                       |                   | 2017                       |                   |
|----------------------------------|----------------------------|-------------------|----------------------------|-------------------|
|                                  | Counts (95% UI)            | Rate (95% UI)     | Counts (95% UI)            | Rate (95% UI)     |
| <b>Global</b>                    | 1075930 (1023619, 1131884) | 20 (18.9, 21.1)   | 1652969 (1550496, 1755854) | 22.2 (20.9, 23.5) |
| <b>High-income North America</b> | 82363 (76782, 88030)       | 26.1 (24.5, 27.7) | 141068 (130611, 151041)    | 29.4 (27.6, 31.2) |
| <b>Canada</b>                    | 6994 (6264, 7822)          | 23.3 (21.1, 25.7) | 13353 (11723, 15163)       | 26.6 (24, 29.5)   |
| <b>Greenland</b>                 | 9 (8, 10)                  | 18.7 (16.9, 20.6) | 13 (12, 15)                | 22 (19.8, 24.3)   |
| <b>USA</b>                       | 75358 (70402, 80383)       | 26.4 (24.8, 27.9) | 127699 (118660, 136505)    | 29.8 (28, 31.5)   |
| <b>Australasia</b>               | 1452 (1333, 1594)          | 7.4 (6.8, 8)      | 3080 (2782, 3409)          | 10.7 (9.9, 11.5)  |
| <b>Australia</b>                 | 1144 (1037, 1273)          | 7 (6.4, 7.7)      | 2580 (2309, 2883)          | 10.6 (9.7, 11.5)  |
| <b>New Zealand</b>               | 308 (290, 326)             | 9.3 (8.8, 9.9)    | 500 (468, 534)             | 11.2 (10.6, 11.8) |
| <b>High-income Asia-Pacific</b>  | 80414 (74244, 88664)       | 48.2 (45.2, 52.2) | 95817 (87249, 104860)      | 48.7 (45.9, 51.8) |
| <b>Brunei</b>                    | 90 (84, 97)                | 39 (35.8, 42.6)   | 181 (162, 202)             | 48.7 (44.1, 54)   |
| <b>Japan</b>                     | 57488 (54196, 61087)       | 48.1 (45.8, 50.4) | 67679 (62386, 73166)       | 51 (48.6, 53.5)   |
| <b>Singapore</b>                 | 905 (815, 1012)            | 33.3 (30, 37)     | 2454 (2126, 2834)          | 43.8 (39.1, 49)   |
| <b>South Korea</b>               | 21930 (18367, 28419)       | 56 (46.8, 72.9)   | 25503 (21763, 29977)       | 45.3 (40.9, 50.7) |
| <b>Western Europe</b>            | 107609 (97635, 118244)     | 26.2 (24.3, 28.2) | 172621 (155471, 190528)    | 34.3 (31.8, 37.1) |
| <b>Andorra</b>                   | 12 (11, 14)                | 23.7 (21.6, 25.9) | 31 (27, 35)                | 34.5 (31.4, 38)   |
| <b>Austria</b>                   | 3104 (2783, 3474)          | 38.3 (35.1, 41.8) | 4366 (3864, 4952)          | 44.1 (40.3, 48.3) |
| <b>Belgium</b>                   | 2224 (1964, 2493)          | 21.6 (19.6, 23.7) | 3832 (3297, 4421)          | 30.4 (27.2, 33.6) |
| <b>Cyprus</b>                    | 117 (106, 129)             | 14.9 (13.6, 16.4) | 306 (270, 343)             | 22.4 (20.3, 24.5) |
| <b>Denmark</b>                   | 1191 (1070, 1324)          | 22.7 (20.9, 24.7) | 2439 (2162, 2746)          | 37.5 (34.3, 40.9) |
| <b>Finland</b>                   | 1253 (1135, 1387)          | 25.1 (23.2, 27.3) | 2504 (2213, 2827)          | 37.7 (34.4, 41.2) |
| <b>France</b>                    | 15567 (13876, 17347)       | 25.2 (22.8, 27.6) | 25489 (22593, 28916)       | 33 (30.1, 36)     |



|                       |                      |                   |                      |                   |
|-----------------------|----------------------|-------------------|----------------------|-------------------|
| <b>Germany</b>        | 22694 (20187, 25525) | 26.4 (24.1, 28.8) | 39514 (34529, 45301) | 39.8 (36.3, 43.7) |
| <b>Greece</b>         | 2479 (2239, 2785)    | 22.2 (20.5, 24.2) | 3982 (3524, 4499)    | 32.4 (29.7, 35.3) |
| <b>Iceland</b>        | 62 (55, 68)          | 23.7 (21.5, 26.1) | 178 (156, 200)       | 46.8 (42.1, 51.6) |
| <b>Ireland</b>        | 737 (683, 802)       | 19.9 (18.5, 21.6) | 1698 (1520, 1881)    | 32.8 (29.9, 35.7) |
| <b>Israel</b>         | 1143 (1055, 1242)    | 22.7 (20.9, 24.7) | 3267 (2962, 3577)    | 34.7 (31.6, 37.8) |
| <b>Italy</b>          | 21295 (18340, 25159) | 35.1 (31.6, 39.9) | 26153 (22864, 29755) | 38.5 (35.3, 42.3) |
| <b>Luxembourg</b>     | 141 (127, 157)       | 35.6 (32.8, 38.9) | 289 (256, 323)       | 46.6 (42.6, 50.8) |
| <b>Malta</b>          | 52 (47, 58)          | 13.6 (12.4, 15.1) | 111 (97, 127)        | 21 (19, 23.1)     |
| <b>Netherlands</b>    | 3087 (2793, 3413)    | 20.6 (19, 22.4)   | 6297 (5552, 7131)    | 31.8 (29.2, 34.7) |
| <b>Norway</b>         | 1240 (1174, 1311)    | 29.9 (28.5, 31.3) | 1844 (1725, 1964)    | 33.2 (31.6, 35)   |
| <b>Portugal</b>       | 2041 (1765, 2348)    | 17.4 (15.4, 19.7) | 3345 (2918, 3788)    | 25.6 (23.2, 28.3) |
| <b>Spain</b>          | 5739 (5122, 6466)    | 14.8 (13.5, 16.3) | 8267 (7188, 9421)    | 19.4 (17.7, 21.4) |
| <b>Sweden</b>         | 2112 (1955, 2263)    | 24.1 (22.7, 25.5) | 3906 (3594, 4252)    | 34.4 (32.3, 36.5) |
| <b>Switzerland</b>    | 1446 (1298, 1625)    | 19.8 (18.1, 21.7) | 2670 (2359, 3011)    | 26.3 (24, 28.9)   |
| <b>United Kingdom</b> | 19770 (18840, 20735) | 31.9 (30.5, 33.3) | 31953 (29972, 33907) | 39.1 (37, 41.1)   |
| <b>Eastern Europe</b> | 60947 (57762, 64231) | 29.3 (27.9, 30.8) | 72874 (67800, 77870) | 38.7 (36.6, 40.8) |
| <b>Belarus</b>        | 2781 (2568, 3009)    | 29.2 (27.2, 31.5) | 3090 (2762, 3435)    | 37 (34.2, 40.1)   |
| <b>Estonia</b>        | 419 (385, 457)       | 29.3 (27.2, 31.6) | 435 (390, 483)       | 37.1 (34.3, 40.2) |
| <b>Latvia</b>         | 659 (606, 718)       | 26.8 (24.9, 28.9) | 594 (533, 664)       | 34.4 (31.8, 37.3) |
| <b>Lithuania</b>      | 1109 (1025, 1203)    | 32.2 (29.9, 34.7) | 1021 (914, 1147)     | 40 (36.9, 43.4)   |
| <b>Moldova</b>        | 2012 (1801, 2255)    | 44.5 (40.2, 49.4) | 1453 (1281, 1641)    | 41 (37.5, 44.7)   |
| <b>Russia</b>         | 39639 (37610, 41660) | 28.8 (27.4, 30.2) | 50768 (47325, 54149) | 38.5 (36.4, 40.5) |
| <b>Ukraine</b>        | 14329 (13541, 15126) | 29.9 (28.4, 31.4) | 15512 (14388, 16575) | 39.9 (37.6, 42)   |
| <b>Central Europe</b> | 37851 (34979, 41032) | 32.2 (30, 34.5)   | 38550 (34423, 43236) | 37 (34.4, 40)     |
| <b>Albania</b>        | 996 (932, 1071)      | 28.4 (26.4, 30.8) | 961 (863, 1073)      | 35.4 (32.6, 38.4) |

|                               |                      |                   |                      |                   |
|-------------------------------|----------------------|-------------------|----------------------|-------------------|
| <b>Bosnia and Herzegovina</b> | 1290 (1185, 1399)    | 30.3 (28.1, 32.7) | 1150 (1022, 1301)    | 35.8 (33, 38.9)   |
| <b>Bulgaria</b>               | 2324 (2129, 2541)    | 29 (27.1, 31.1)   | 2190 (1931, 2482)    | 34.1 (31.6, 36.7) |
| <b>Croatia</b>                | 1443 (1309, 1604)    | 31.3 (28.9, 33.8) | 1273 (1123, 1451)    | 31 (28.7, 33.7)   |
| <b>Czech Republic</b>         | 2529 (2325, 2754)    | 26.4 (24.5, 28.4) | 3123 (2773, 3517)    | 32.4 (30.1, 35)   |
| <b>Hungary</b>                | 3516 (3185, 3873)    | 35.2 (32.4, 38.1) | 2955 (2624, 3347)    | 33.6 (31.2, 36.4) |
| <b>Macedonia</b>              | 551 (511, 593)       | 28.3 (26.3, 30.4) | 677 (609, 757)       | 34.4 (31.7, 37.2) |
| <b>Montenegro</b>             | 169 (157, 183)       | 28.1 (26.2, 30.3) | 200 (180, 223)       | 34.1 (31.5, 37)   |
| <b>Poland</b>                 | 12720 (11893, 13658) | 34.7 (32.5, 37.3) | 13969 (12511, 15541) | 42.4 (39.4, 45.6) |
| <b>Romania</b>                | 7553 (6903, 8273)    | 32.7 (30.3, 35.4) | 6955 (6155, 7927)    | 36.9 (34, 40.2)   |
| <b>Serbia</b>                 | 1673 (1525, 1843)    | 18.7 (17.3, 20.2) | 2026 (1804, 2277)    | 23.8 (21.9, 25.8) |
| <b>Slovakia</b>               | 2481 (2295, 2668)    | 49.2 (45.6, 52.8) | 2438 (2180, 2728)    | 52 (48.3, 56.1)   |
| <b>Slovenia</b>               | 606 (547, 674)       | 31.9 (29.2, 34.8) | 632 (556, 721)       | 31.9 (29.5, 34.7) |
| <b>Central Asia</b>           | 17932 (16774, 19149) | 24 (22.4, 25.8)   | 29632 (27462, 31963) | 34.2 (31.7, 36.9) |
| <b>Armenia</b>                | 738 (683, 798)       | 21.6 (20, 23.4)   | 920 (835, 1017)      | 32.8 (30.3, 35.5) |
| <b>Azerbaijan</b>             | 1678 (1557, 1808)    | 22.4 (20.7, 24.3) | 2990 (2730, 3273)    | 32.6 (30, 35.2)   |
| <b>Georgia</b>                | 1176 (1078, 1280)    | 21.8 (20.2, 23.6) | 1118 (1012, 1240)    | 32.3 (29.8, 34.9) |
| <b>Kazakhstan</b>             | 3597 (3338, 3866)    | 21 (19.4, 22.6)   | 5670 (5222, 6141)    | 33.6 (31, 36.3)   |
| <b>Kyrgyzstan</b>             | 1180 (1100, 1263)    | 24.7 (22.8, 26.7) | 2192 (2029, 2372)    | 34.9 (32.1, 37.7) |
| <b>Mongolia</b>               | 582 (543, 622)       | 24 (22.2, 25.8)   | 909 (841, 985)       | 30.5 (28.2, 33.1) |
| <b>Tajikistan</b>             | 1608 (1503, 1718)    | 25.7 (23.9, 27.7) | 3259 (3047, 3505)    | 34.5 (32, 37.2)   |
| <b>Turkmenistan</b>           | 1089 (1015, 1170)    | 26.7 (24.6, 28.8) | 1739 (1602, 1880)    | 36.5 (33.7, 39.4) |
| <b>Uzbekistan</b>             | 6285 (5862, 6750)    | 27 (25, 29.1)     | 10835 (10052, 11710) | 35.1 (32.5, 38)   |
| <b>Central Latin America</b>  | 30128 (28670, 31725) | 19.8 (18.6, 21.1) | 60251 (55600, 64966) | 24.7 (22.8, 26.7) |
| <b>Colombia</b>               | 4541 (4265, 4839)    | 13.9 (12.9, 15)   | 10384 (9261, 11636)  | 20.5 (18.4, 22.8) |
| <b>Costa Rica</b>             | 476 (445, 509)       | 16 (14.7, 17.4)   | 1023 (900, 1158)     | 22.4 (19.9, 25.1) |

|                             |                      |                   |                      |                   |
|-----------------------------|----------------------|-------------------|----------------------|-------------------|
| <b>El Salvador</b>          | 811 (757, 866)       | 15·6 (14·2, 17·1) | 1301 (1163, 1457)    | 22·2 (19·8, 25·1) |
| <b>Guatemala</b>            | 1340 (1256, 1433)    | 16·6 (15, 18·3)   | 3262 (2977, 3574)    | 22·2 (19·7, 24·9) |
| <b>Honduras</b>             | 829 (778, 882)       | 17·3 (15·8, 19)   | 1865 (1702, 2042)    | 22·2 (19·8, 24·8) |
| <b>Mexico</b>               | 18436 (17582, 19247) | 24·5 (23, 25·8)   | 33993 (31735, 36241) | 28·3 (26·4, 30·2) |
| <b>Nicaragua</b>            | 592 (557, 633)       | 15·3 (14, 16·8)   | 1259 (1143, 1388)    | 22·1 (19·6, 24·8) |
| <b>Panama</b>               | 344 (320, 370)       | 14·9 (13·7, 16·2) | 843 (752, 943)       | 21·6 (19·3, 24·1) |
| <b>Venezuela</b>            | 2760 (2582, 2947)    | 14·9 (13·7, 16·2) | 6320 (5642, 7046)    | 21·8 (19·5, 24·3) |
| <b>Andean Latin America</b> | 4650 (4324, 4981)    | 13 (11·8, 14·3)   | 16303 (14934, 17871) | 27·6 (25·1, 30·5) |
| <b>Bolivia</b>              | 717 (666, 768)       | 11·8 (10·6, 13)   | 2843 (2618, 3070)    | 26 (23·6, 28·6)   |
| <b>Ecuador</b>              | 1243 (1155, 1334)    | 13·4 (12·1, 14·7) | 4616 (4217, 5081)    | 29 (26·4, 32·1)   |
| <b>Peru</b>                 | 2689 (2500, 2892)    | 13·2 (11·9, 14·5) | 8843 (8086, 9698)    | 27·3 (24·8, 30·2) |
| <b>Caribbean</b>            | 4343 (4007, 4707)    | 13 (11·9, 14·3)   | 9119 (8202, 10145)   | 19·6 (17·7, 21·6) |
| <b>Antigua and Barbuda</b>  | 8 (7, 9)             | 13·5 (12·3, 14·7) | 18 (16, 20)          | 20·6 (18·8, 22·7) |
| <b>The Bahamas</b>          | 31 (29, 34)          | 13·7 (12·5, 15·1) | 70 (63, 78)          | 20 (18·2, 22)     |
| <b>Barbados</b>             | 34 (31, 37)          | 13 (12, 14·3)     | 68 (59, 77)          | 20·3 (18·5, 22·4) |
| <b>Belize</b>               | 24 (22, 25)          | 13·1 (12, 14·5)   | 71 (65, 76)          | 20 (18·1, 21·9)   |
| <b>Bermuda</b>              | 8 (7, 8)             | 14 (12·9, 15·3)   | 16 (14, 19)          | 21·3 (19·4, 23·4) |
| <b>Cuba</b>                 | 1329 (1218, 1458)    | 12·9 (11·9, 14·1) | 2706 (2383, 3072)    | 20·9 (19, 23)     |
| <b>Dominica</b>             | 10 (9, 11)           | 12·8 (11·8, 14·1) | 15 (13, 16)          | 19·8 (18·1, 21·8) |
| <b>Dominican Republic</b>   | 891 (828, 958)       | 13·7 (12·5, 15·2) | 1940 (1763, 2130)    | 19·9 (18, 21·9)   |
| <b>Grenada</b>              | 12 (11, 13)          | 13·1 (12, 14·4)   | 23 (21, 26)          | 19·5 (17·7, 21·3) |
| <b>Guyana</b>               | 92 (86, 99)          | 13·2 (12·1, 14·5) | 133 (121, 144)       | 19·1 (17·5, 21)   |
| <b>Haiti</b>                | 624 (582, 673)       | 10·1 (9·2, 11·1)  | 1709 (1580, 1842)    | 16·3 (14·8, 18)   |
| <b>Jamaica</b>              | 289 (269, 310)       | 12 (11·1, 13·1)   | 535 (485, 589)       | 19·8 (18, 21·7)   |
| <b>Puerto Rico</b>          | 606 (546, 673)       | 16·6 (15, 18·5)   | 1020 (892, 1177)     | 22 (19·9, 24·4)   |

|                                         |                         |                   |                         |                   |
|-----------------------------------------|-------------------------|-------------------|-------------------------|-------------------|
| <b>Saint Lucia</b>                      | 18 (17, 20)             | 13.9 (12.7, 15.2) | 35 (31, 39)             | 20.1 (18.3, 22)   |
| <b>Saint Vincent and the Grenadines</b> | 14 (13, 15)             | 12.5 (11.5, 13.6) | 22 (20, 25)             | 19.2 (17.6, 21.1) |
| <b>Suriname</b>                         | 47 (43, 51)             | 13.1 (11.9, 14.5) | 109 (99, 120)           | 19.5 (17.8, 21.5) |
| <b>Trinidad and Tobago</b>              | 144 (134, 156)          | 12.5 (11.5, 13.7) | 276 (245, 309)          | 19.5 (17.7, 21.3) |
| <b>Virgin Islands</b>                   | 14 (13, 15)             | 13.8 (12.6, 15.1) | 26 (23, 30)             | 20.7 (18.9, 22.8) |
| <b>Tropical Latin America</b>           | 21700 (20666, 22665)    | 15.6 (14.7, 16.4) | 36375 (34113, 38393)    | 17 (16.1, 17.9)   |
| <b>Brazil</b>                           | 21165 (20156, 22109)    | 15.6 (14.8, 16.4) | 35243 (33066, 37206)    | 17 (16.1, 17.9)   |
| <b>Paraguay</b>                         | 535 (502, 571)          | 13.8 (12.7, 15.1) | 1131 (1035, 1227)       | 17.7 (16.1, 19.4) |
| <b>Southern Latin America</b>           | 10113 (9176, 11135)     | 20.5 (18.5, 22.5) | 25445 (22798, 28455)    | 37.1 (33.7, 40.8) |
| <b>Argentina</b>                        | 6328 (5759, 6944)       | 18.8 (17.1, 20.6) | 16462 (14803, 18305)    | 35.9 (32.7, 39.4) |
| <b>Chile</b>                            | 3146 (2836, 3485)       | 26.2 (23.4, 29.3) | 7561 (6710, 8544)       | 39.6 (35.9, 43.9) |
| <b>Uruguay</b>                          | 639 (576, 711)          | 18.8 (17.1, 20.6) | 1420 (1274, 1588)       | 36.9 (33.7, 40.4) |
| <b>East Asia</b>                        | 202203 (192297, 213069) | 16.3 (15.5, 17.1) | 189830 (177729, 202093) | 15.6 (14.8, 16.5) |
| <b>China</b>                            | 195881 (186204, 206468) | 16.6 (15.7, 17.4) | 181656 (169962, 193239) | 15.7 (15, 16.6)   |
| <b>North Korea</b>                      | 1725 (1599, 1863)       | 8.8 (8.2, 9.5)    | 2776 (2518, 3062)       | 13 (12, 14.1)     |
| <b>Taiwan (Province of China)</b>       | 1229 (1122, 1346)       | 6.6 (6.1, 7.3)    | 2339 (2071, 2621)       | 11.6 (10.7, 12.6) |
| <b>Southeast Asia</b>                   | 22903 (21521, 24447)    | 4.5 (4.2, 4.8)    | 39790 (36814, 42966)    | 6.5 (6, 7)        |
| <b>Cambodia</b>                         | 505 (471, 542)          | 4 (3.7, 4.3)      | 1010 (933, 1095)        | 6.3 (5.8, 6.9)    |
| <b>Indonesia</b>                        | 10170 (9568, 10764)     | 5.1 (4.8, 5.4)    | 12394 (11654, 13150)    | 5.2 (4.9, 5.5)    |
| <b>Laos</b>                             | 184 (172, 198)          | 3.7 (3.4, 4)      | 434 (402, 469)          | 6.2 (5.7, 6.7)    |
| <b>Malaysia</b>                         | 685 (629, 745)          | 3.5 (3.2, 3.8)    | 1756 (1602, 1934)       | 6.2 (5.7, 6.8)    |
| <b>Maldives</b>                         | 11 (10, 12)             | 3.9 (3.6, 4.2)    | 26 (24, 29)             | 6.9 (6.4, 7.6)    |
| <b>Mauritius</b>                        | 46 (42, 50)             | 4.3 (4, 4.6)      | 75 (67, 82)             | 6.8 (6.3, 7.4)    |
| <b>Myanmar</b>                          | 1632 (1509, 1768)       | 3.7 (3.4, 4.1)    | 3065 (2822, 3342)       | 6.2 (5.7, 6.7)    |
| <b>Philippines</b>                      | 1683 (1550, 1825)       | 2.2 (2.1, 2.4)    | 5227 (4786, 5701)       | 5 (4.6, 5.5)      |

|                                       |                      |                   |                         |                   |
|---------------------------------------|----------------------|-------------------|-------------------------|-------------------|
| <b>Sri Lanka</b>                      | 697 (645, 758)       | 4 (3·7, 4·4)      | 1405 (1278, 1544)       | 6·8 (6·3, 7·5)    |
| <b>Seychelles</b>                     | 3 (3, 3)             | 4·1 (3·8, 4·5)    | 6 (6, 7)                | 7·2 (6·6, 7·8)    |
| <b>Thailand</b>                       | 2439 (2238, 2661)    | 4·5 (4·1, 4·9)    | 4692 (4104, 5275)       | 7·6 (6·9, 8·4)    |
| <b>East Timor</b>                     | 33 (30, 35)          | 3·6 (3·3, 3·9)    | 90 (83, 97)             | 6·3 (5·8, 6·8)    |
| <b>Vietnam</b>                        | 4786 (4397, 5196)    | 6·1 (5·7, 6·7)    | 9558 (8704, 10470)      | 11·3 (10·3, 12·3) |
| <b>Oceania</b>                        | 484 (447, 522)       | 6 (5·6, 6·5)      | 1292 (1196, 1395)       | 9 (8·3, 9·7)      |
| <b>American Samoa</b>                 | 4 (4, 4)             | 6·8 (6·3, 7·4)    | 6 (5, 6)                | 10 (9·2, 10·8)    |
| <b>Federated States of Micronesia</b> | 10 (9, 10)           | 6·9 (6·4, 7·5)    | 11 (10, 12)             | 9·9 (9·1, 10·6)   |
| <b>Fiji</b>                           | 50 (47, 55)          | 5·7 (5·3, 6·2)    | 82 (76, 89)             | 9·1 (8·4, 9·8)    |
| <b>Guam</b>                           | 9 (9, 10)            | 6·8 (6·2, 7·4)    | 16 (14, 17)             | 9·7 (8·9, 10·5)   |
| <b>Kiribati</b>                       | 6 (6, 7)             | 6·8 (6·3, 7·3)    | 14 (13, 15)             | 10·1 (9·4, 11)    |
| <b>Marshall Islands</b>               | 4 (4, 5)             | 6·9 (6·4, 7·4)    | 6 (6, 7)                | 10 (9·2, 10·9)    |
| <b>Northern Mariana Islands</b>       | 3 (3, 3)             | 6·7 (6·2, 7·3)    | 4 (3, 4)                | 9·7 (8·9, 10·5)   |
| <b>Papua New Guinea</b>               | 299 (276, 323)       | 5·8 (5·4, 6·2)    | 937 (866, 1013)         | 8·7 (8·1, 9·4)    |
| <b>Samoa</b>                          | 15 (14, 16)          | 7·2 (6·7, 7·8)    | 25 (23, 27)             | 10·5 (9·8, 11·4)  |
| <b>Solomon Islands</b>                | 29 (27, 31)          | 6·2 (5·8, 6·7)    | 74 (68, 80)             | 9·6 (8·9, 10·4)   |
| <b>Tonga</b>                          | 9 (8, 10)            | 7·3 (6·8, 7·9)    | 12 (11, 13)             | 10·8 (9·9, 11·7)  |
| <b>Vanuatu</b>                        | 14 (13, 15)          | 7·2 (6·6, 7·7)    | 34 (32, 37)             | 9·9 (9·2, 10·8)   |
| <b>North Africa and Middle East</b>   | 89906 (84376, 95996) | 22·6 (21·1, 24·3) | 149697 (139848, 160369) | 25·7 (23·9, 27·5) |
| <b>Afghanistan</b>                    | 3065 (2861, 3285)    | 24 (22·4, 25·9)   | 10720 (9984, 11555)     | 26 (24·1, 28)     |
| <b>Algeria</b>                        | 7039 (6559, 7535)    | 23·6 (21·8, 25·6) | 10156 (9434, 10928)     | 27·3 (25·3, 29·5) |
| <b>Bahrain</b>                        | 112 (104, 120)       | 24·1 (22·4, 26)   | 287 (264, 313)          | 27·6 (25·6, 29·9) |
| <b>Egypt</b>                          | 15723 (14418, 17127) | 25·5 (23·4, 28)   | 25800 (23626, 28161)    | 25·9 (23·7, 28·4) |
| <b>Iran</b>                           | 15581 (14708, 16459) | 20·8 (19·6, 21·9) | 16760 (15828, 17756)    | 23·9 (22·6, 25·3) |
| <b>Iraq</b>                           | 5191 (4852, 5573)    | 23·8 (22·2, 25·7) | 12634 (11740, 13567)    | 26·4 (24·6, 28·5) |

|                                    |                         |                   |                         |                   |
|------------------------------------|-------------------------|-------------------|-------------------------|-------------------|
| <b>Jordan</b>                      | 1209 (1113, 1320)       | 26.8 (24.6, 29.1) | 3556 (3270, 3883)       | 32.8 (30.3, 35.7) |
| <b>Kuwait</b>                      | 380 (353, 410)          | 22.6 (21.1, 24.3) | 843 (779, 914)          | 27.6 (25.6, 29.7) |
| <b>Lebanon</b>                     | 1112 (1037, 1197)       | 23.5 (21.8, 25.5) | 2301 (2143, 2485)       | 28.1 (26, 30.4)   |
| <b>Libya</b>                       | 1171 (1093, 1256)       | 23.9 (22.3, 25.8) | 1751 (1630, 1896)       | 28.1 (26, 30.4)   |
| <b>Morocco</b>                     | 6578 (6132, 7065)       | 23.3 (21.7, 25.2) | 8971 (8330, 9694)       | 26.8 (24.9, 28.8) |
| <b>Palestine</b>                   | 623 (581, 669)          | 24.5 (22.8, 26.5) | 1510 (1404, 1627)       | 28.6 (26.5, 31)   |
| <b>Oman</b>                        | 547 (511, 584)          | 25.6 (23.8, 27.8) | 899 (831, 975)          | 27.8 (25.8, 30.1) |
| <b>Qatar</b>                       | 87 (81, 94)             | 24.6 (22.8, 26.6) | 419 (381, 461)          | 27.7 (25.7, 30)   |
| <b>Saudi Arabia</b>                | 4205 (3870, 4551)       | 22.4 (20.6, 24.4) | 6548 (5901, 7173)       | 25.3 (23.1, 27.5) |
| <b>Sudan</b>                       | 6096 (5679, 6539)       | 24.9 (23.2, 27)   | 12629 (11738, 13561)    | 27.6 (25.5, 29.7) |
| <b>Syria</b>                       | 3766 (3522, 4048)       | 23.8 (22.2, 25.8) | 5345 (4958, 5761)       | 27.5 (25.4, 29.7) |
| <b>Tunisia</b>                     | 2645 (2442, 2866)       | 29.5 (26.9, 32.4) | 3640 (3276, 4036)       | 34.3 (31.2, 37.7) |
| <b>Turkey</b>                      | 10072 (9301, 10942)     | 16.5 (15.1, 18)   | 14515 (13116, 16042)    | 19.5 (17.8, 21.4) |
| <b>United Arab Emirates</b>        | 398 (370, 427)          | 24 (22.3, 26)     | 1279 (1155, 1407)       | 26.9 (24.9, 29)   |
| <b>Yemen</b>                       | 4249 (3977, 4536)       | 23.8 (22.2, 25.7) | 8995 (8397, 9665)       | 26.1 (24.2, 28.1) |
| <b>South Asia</b>                  | 135878 (129136, 142998) | 10.8 (10.3, 11.4) | 221471 (209587, 233518) | 12.4 (11.7, 13)   |
| <b>Bangladesh</b>                  | 16352 (15261, 17486)    | 12.5 (11.7, 13.5) | 20225 (18710, 21781)    | 13 (12.1, 14)     |
| <b>Bhutan</b>                      | 80 (74, 86)             | 12.3 (11.5, 13.3) | 123 (114, 133)          | 13.6 (12.6, 14.7) |
| <b>India</b>                       | 102849 (97857, 108113)  | 10.6 (10.1, 11.1) | 169429 (160726, 178116) | 12.4 (11.8, 13)   |
| <b>Nepal</b>                       | 2396 (2243, 2563)       | 10.6 (9.9, 11.4)  | 3781 (3511, 4074)       | 12.1 (11.2, 13)   |
| <b>Pakistan</b>                    | 14201 (13234, 15290)    | 11 (10.2, 12)     | 27912 (25762, 30058)    | 12.1 (11.2, 13.1) |
| <b>Southern sub-Saharan Africa</b> | 17304 (16453, 18164)    | 31.5 (29.9, 33.1) | 21563 (20495, 22668)    | 28.7 (27.3, 30.2) |
| <b>Botswana</b>                    | 365 (344, 388)          | 25.8 (24, 27.8)   | 598 (557, 643)          | 28.1 (26.1, 30.4) |
| <b>Lesotho</b>                     | 541 (508, 576)          | 27.4 (25.5, 29.5) | 528 (493, 565)          | 27.3 (25.3, 29.3) |
| <b>Namibia</b>                     | 326 (305, 348)          | 21.5 (19.9, 23.1) | 587 (547, 625)          | 25 (23.2, 26.9)   |

|                                   |                      |                   |                         |                   |
|-----------------------------------|----------------------|-------------------|-------------------------|-------------------|
| <b>South Africa</b>               | 12221 (11664, 12831) | 32.4 (30.8, 34)   | 14745 (14014, 15488)    | 28.3 (26.9, 29.7) |
| <b>Swaziland</b>                  | 234 (221, 248)       | 26.3 (24.5, 28.2) | 318 (297, 339)          | 28.1 (26, 30.1)   |
| <b>Zimbabwe</b>                   | 3617 (3399, 3841)    | 31.4 (29.2, 33.8) | 4788 (4483, 5082)       | 31.1 (28.9, 33.4) |
| <b>Western sub-Saharan Africa</b> | 72146 (68007, 76511) | 36.1 (33.3, 39)   | 164206 (154385, 175152) | 37.9 (35, 41.1)   |
| <b>Benin</b>                      | 2025 (1906, 2153)    | 38.7 (35.7, 42)   | 4803 (4513, 5125)       | 40.8 (37.8, 44.4) |
| <b>Burkina Faso</b>               | 4930 (4652, 5254)    | 45.3 (42.1, 49)   | 9583 (8976, 10190)      | 43.9 (40.5, 47.7) |
| <b>Cameroon</b>                   | 3823 (3588, 4066)    | 35.6 (32.7, 38.7) | 10414 (9753, 11115)     | 37.7 (34.7, 40.8) |
| <b>Cape Verde</b>                 | 154 (144, 164)       | 40.2 (37.1, 43.6) | 218 (201, 235)          | 42.5 (38.9, 46.1) |
| <b>Chad</b>                       | 2789 (2626, 2975)    | 41.7 (38.5, 45.1) | 6505 (6117, 6940)       | 39.3 (36.2, 42.6) |
| <b>Côte d'Ivoire</b>              | 4514 (4227, 4808)    | 35.4 (32.7, 38.3) | 9212 (8639, 9840)       | 37.7 (34.7, 40.8) |
| <b>The Gambia</b>                 | 402 (377, 427)       | 38.8 (35.8, 41.9) | 905 (848, 964)          | 42.3 (39, 45.8)   |
| <b>Ghana</b>                      | 5010 (4708, 5314)    | 33.3 (30.7, 36.1) | 10640 (9955, 11431)     | 37.3 (34.3, 40.6) |
| <b>Guinea</b>                     | 2536 (2381, 2701)    | 38.4 (35.5, 41.4) | 4651 (4367, 4970)       | 38 (35, 41.4)     |
| <b>Guinea-Bissau</b>              | 439 (412, 465)       | 39.2 (36.4, 42.5) | 726 (681, 774)          | 38.2 (35.3, 41.3) |
| <b>Liberia</b>                    | 874 (821, 934)       | 40.1 (37, 43.6)   | 1950 (1830, 2084)       | 41.2 (38.1, 44.7) |
| <b>Mali</b>                       | 4266 (4020, 4551)    | 45.4 (41.9, 49.2) | 10044 (9403, 10674)     | 46.7 (43, 50.6)   |
| <b>Mauritania</b>                 | 791 (743, 842)       | 36.7 (33.9, 39.8) | 1563 (1461, 1671)       | 39.6 (36.4, 43)   |
| <b>Niger</b>                      | 3862 (3632, 4106)    | 43.4 (40.1, 47.1) | 10457 (9803, 11152)     | 44.6 (41, 48.4)   |
| <b>Nigeria</b>                    | 29208 (27402, 31171) | 32.5 (29.9, 35.3) | 70422 (65964, 75457)    | 34.9 (32, 38.1)   |
| <b>São Tomé and Príncipe</b>      | 60 (57, 64)          | 45.3 (41.8, 49.1) | 88 (82, 94)             | 45.5 (41.8, 49.3) |
| <b>Senegal</b>                    | 3068 (2873, 3272)    | 37.2 (34.3, 40.2) | 5974 (5590, 6400)       | 40.4 (37.1, 43.8) |
| <b>Sierra Leone</b>               | 1874 (1759, 2000)    | 46.3 (42.8, 50.1) | 3217 (3018, 3445)       | 41.1 (38, 44.7)   |
| <b>Togo</b>                       | 1520 (1426, 1619)    | 38.9 (35.9, 42)   | 2833 (2638, 3049)       | 38.6 (35.6, 42)   |
| <b>Eastern sub-Saharan Africa</b> | 58349 (55165, 61561) | 31.4 (29.2, 33.7) | 124376 (117811, 131765) | 33.4 (31, 35.9)   |
| <b>Burundi</b>                    | 1621 (1518, 1729)    | 31.1 (28.5, 33.9) | 3289 (3078, 3522)       | 32.1 (29.4, 35)   |

|                                   |                      |                   |                      |                   |
|-----------------------------------|----------------------|-------------------|----------------------|-------------------|
| <b>Comoros</b>                    | 143 (134, 152)       | 32.1 (29.4, 35)   | 231 (215, 250)       | 34.8 (31.9, 38.1) |
| <b>Djibouti</b>                   | 146 (137, 156)       | 32.2 (29.6, 35.1) | 334 (311, 361)       | 34.7 (31.9, 38)   |
| <b>Eritrea</b>                    | 848 (795, 904)       | 31.3 (28.8, 34.1) | 1764 (1650, 1893)    | 33.9 (31.1, 36.9) |
| <b>Ethiopia</b>                   | 15026 (14311, 15798) | 28.8 (27.1, 30.4) | 31977 (30457, 33665) | 30.6 (28.8, 32.2) |
| <b>Kenya</b>                      | 7502 (7145, 7877)    | 35.5 (33.2, 37.7) | 16015 (15244, 16865) | 37.2 (34.8, 39.4) |
| <b>Madagascar</b>                 | 3691 (3465, 3927)    | 31.9 (29.3, 34.8) | 8142 (7623, 8716)    | 34 (31, 37.2)     |
| <b>Malawi</b>                     | 3183 (2989, 3399)    | 34.3 (31.5, 37.5) | 5858 (5494, 6264)    | 36.4 (33.3, 39.7) |
| <b>Mozambique</b>                 | 4357 (4086, 4655)    | 30.7 (28.1, 33.4) | 9683 (9089, 10357)   | 34.3 (31.5, 37.6) |
| <b>Rwanda</b>                     | 2395 (2234, 2571)    | 33.4 (30.4, 36.6) | 3918 (3638, 4216)    | 33.2 (30.2, 36.5) |
| <b>Somalia</b>                    | 2047 (1923, 2186)    | 29.6 (27.1, 32.3) | 5169 (4851, 5537)    | 31.9 (29.3, 34.8) |
| <b>South Sudan</b>                | 1875 (1753, 2009)    | 33.1 (30.4, 36.2) | 3330 (3126, 3566)    | 34.6 (31.7, 37.8) |
| <b>Tanzania</b>                   | 7870 (7357, 8403)    | 31.4 (28.8, 34.4) | 17122 (16061, 18326) | 33.9 (31, 37.3)   |
| <b>Uganda</b>                     | 5215 (4894, 5558)    | 30.6 (28, 33.4)   | 12270 (11521, 13086) | 33.1 (30.4, 36.1) |
| <b>Zambia</b>                     | 2401 (2262, 2559)    | 32 (29.3, 35.1)   | 5196 (4867, 5542)    | 32.5 (29.8, 35.6) |
| <b>Central sub-Saharan Africa</b> | 17252 (16231, 18413) | 29.7 (27.5, 32.2) | 39610 (37196, 42350) | 31.9 (29.4, 34.6) |
| <b>Angola</b>                     | 3268 (3064, 3490)    | 30.6 (28.2, 33.2) | 9312 (8722, 9932)    | 32 (29.4, 34.6)   |
| <b>Central African Republic</b>   | 761 (714, 812)       | 26.4 (24.5, 28.6) | 1301 (1216, 1396)    | 27.8 (25.7, 30.2) |
| <b>Congo</b>                      | 663 (622, 709)       | 26.1 (24, 28.2)   | 1320 (1233, 1416)    | 27.9 (25.7, 30.2) |
| <b>DR Congo</b>                   | 12155 (11399, 13010) | 30 (27.8, 32.5)   | 26771 (25120, 28631) | 32.4 (29.9, 35.3) |
| <b>Equatorial Guinea</b>          | 128 (120, 136)       | 28.1 (25.8, 30.4) | 422 (395, 453)       | 31.3 (28.8, 33.9) |
| <b>Gabon</b>                      | 277 (259, 296)       | 27.5 (25.3, 29.9) | 483 (450, 519)       | 29.5 (27.2, 32)   |



**Appendix Table 21: Number of prevalent cases and age-standardised prevalence rates of compensated cirrhosis due to hepatitis B per 100 000 in 1990 and 2017 for both sexes by location**

|                                  | 1990                          |                         | 2017                          |                      |
|----------------------------------|-------------------------------|-------------------------|-------------------------------|----------------------|
|                                  | Counts (95% UI)               | Rate (95% UI)           | Counts (95% UI)               | Rate (95% UI)        |
| <b>Global</b>                    | 22476685 (21192220, 23949930) | 461.8 (435.8, 491.2)    | 36666899 (34057354, 39502936) | 451.9 (420, 485.9)   |
| <b>High-income North America</b> | 70334 (65293, 75497)          | 21.6 (20.1, 23.2)       | 93385 (86034, 100916)         | 19.4 (17.8, 20.9)    |
| <b>Canada</b>                    | 5183 (4616, 5772)             | 16.2 (14.4, 18)         | 8411 (7250, 9552)             | 16.6 (14.4, 18.9)    |
| <b>Greenland</b>                 | 8 (7, 9)                      | 14.4 (12.8, 16.1)       | 11 (10, 13)                   | 16.9 (14.6, 19.2)    |
| <b>USA</b>                       | 65141 (60509, 69943)          | 22.2 (20.7, 23.9)       | 84961 (78235, 91437)          | 19.7 (18.1, 21.2)    |
| <b>Australasia</b>               | 30140 (27274, 32972)          | 134.8 (122.1, 147.4)    | 43338 (39065, 47734)          | 126.1 (113.8, 139.2) |
| <b>Australia</b>                 | 24580 (22033, 27109)          | 131.5 (118.3, 144.8)    | 36170 (32323, 40171)          | 124.4 (111, 138.4)   |
| <b>New Zealand</b>               | 5560 (5155, 5959)             | 151.3 (140.4, 162.3)    | 7168 (6602, 7759)             | 135.9 (125.5, 146.9) |
| <b>High-income Asia-Pacific</b>  | 1332253 (1224859, 1434949)    | 678.5 (623.3, 729.5)    | 1200685 (1099016, 1312735)    | 497.7 (454.3, 545.8) |
| <b>Brunei</b>                    | 1529 (1400, 1652)             | 670.1 (618.3, 723)      | 3208 (2881, 3565)             | 669.1 (603.4, 736.2) |
| <b>Japan</b>                     | 554533 (516166, 595096)       | 368.8 (343.5, 395)      | 570486 (528503, 615185)       | 334.7 (310.7, 363)   |
| <b>Singapore</b>                 | 30549 (27893, 33183)          | 885.4 (808.6, 961.8)    | 58675 (52407, 65035)          | 834.7 (746.9, 926.3) |
| <b>South Korea</b>               | 745642 (670761, 819043)       | 1669.2 (1500.1, 1830.2) | 568317 (501176, 634130)       | 818.9 (725.4, 915.2) |
| <b>Western Europe</b>            | 620541 (561234, 684040)       | 137.3 (124, 151.8)      | 676099 (608191, 750868)       | 124.1 (111.1, 138.3) |
| <b>Andorra</b>                   | 71 (63, 80)                   | 107.2 (95.5, 120.2)     | 123 (109, 139)                | 113.3 (100.5, 127.8) |
| <b>Austria</b>                   | 15775 (14151, 17607)          | 173.9 (155, 194.6)      | 16245 (14676, 17980)          | 145.1 (130.5, 161.4) |
| <b>Belgium</b>                   | 14486 (11660, 17717)          | 121.7 (97.4, 150.6)     | 16281 (12990, 20022)          | 116.9 (93.2, 148.1)  |
| <b>Cyprus</b>                    | 657 (589, 732)                | 79.6 (71.4, 88.6)       | 1183 (1044, 1332)             | 73.3 (65, 82.4)      |
| <b>Denmark</b>                   | 5429 (4918, 5964)             | 88.7 (80.3, 97.6)       | 9098 (8200, 10010)            | 132.1 (118.6, 146.4) |
| <b>Finland</b>                   | 5479 (4993, 6047)             | 90.6 (82, 100.1)        | 9515 (8625, 10456)            | 142.9 (128.5, 158.9) |
| <b>France</b>                    | 86310 (77911, 95863)          | 130.7 (117.8, 145.2)    | 85271 (76650, 94116)          | 109.7 (97.6, 121.8)  |

|                       |                         |                      |                          |                      |
|-----------------------|-------------------------|----------------------|--------------------------|----------------------|
| <b>Germany</b>        | 122730 (111892, 134829) | 126.3 (114.1, 138.6) | 141528 (126748, 156448)  | 133.1 (118.2, 147.8) |
| <b>Greece</b>         | 17807 (16042, 19661)    | 146.8 (132.2, 163)   | 16487 (14474, 18693)     | 122.1 (106.3, 139.7) |
| <b>Iceland</b>        | 127 (111, 146)          | 47.6 (41.5, 54.6)    | 306 (267, 349)           | 79.2 (69, 91.2)      |
| <b>Ireland</b>        | 2470 (2231, 2717)       | 68.2 (61.5, 75.1)    | 6074 (5448, 6747)        | 105.4 (94.8, 117.5)  |
| <b>Israel</b>         | 5106 (4609, 5603)       | 108.2 (98.1, 118.9)  | 10361 (9152, 11641)      | 112.3 (99.4, 126.3)  |
| <b>Italy</b>          | 183803 (163656, 205217) | 268.7 (238, 302.6)   | 167813 (146851, 191109)  | 206.8 (180.5, 237.5) |
| <b>Luxembourg</b>     | 823 (743, 903)          | 173.3 (156.6, 190.7) | 1138 (1000, 1280)        | 151.4 (132.6, 171.1) |
| <b>Malta</b>          | 303 (273, 336)          | 71.5 (64.7, 79.3)    | 377 (337, 419)           | 68.4 (60.9, 76.3)    |
| <b>Netherlands</b>    | 15901 (14423, 17537)    | 89.9 (81.5, 99.3)    | 21819 (19597, 24021)     | 104.5 (93.3, 115.6)  |
| <b>Norway</b>         | 5198 (4841, 5598)       | 105.7 (98.2, 113.9)  | 7547 (6981, 8148)        | 119.8 (110.6, 129.1) |
| <b>Portugal</b>       | 17393 (15524, 19508)    | 154.5 (137.5, 173.6) | 11931 (10441, 13453)     | 87.2 (76.3, 98.6)    |
| <b>Spain</b>          | 64656 (52513, 78819)    | 147.1 (118.4, 181.4) | 61142 (49354, 74698)     | 100.9 (81, 125.2)    |
| <b>Sweden</b>         | 9723 (8962, 10577)      | 95.4 (87.6, 103.9)   | 16755 (15277, 18161)     | 139 (126.3, 151.8)   |
| <b>Switzerland</b>    | 7127 (6491, 7844)       | 84 (76.6, 92.6)      | 10266 (9239, 11404)      | 93.7 (84.5, 104.1)   |
| <b>United Kingdom</b> | 38568 (35227, 42110)    | 57.9 (52.7, 63.5)    | 64139 (58383, 70063)     | 79.9 (72.3, 87.7)    |
| <b>Eastern Europe</b> | 757805 (706047, 810099) | 299.3 (278.9, 320.2) | 986353 (912112, 1065280) | 383.2 (354.5, 414.9) |
| <b>Belarus</b>        | 28791 (25690, 32012)    | 249.5 (221.2, 278.2) | 37745 (33372, 42504)     | 322.4 (283.6, 363.8) |
| <b>Estonia</b>        | 4355 (3885, 4859)       | 249.4 (222.2, 279.3) | 4710 (4191, 5298)        | 295.4 (260.8, 333.7) |
| <b>Latvia</b>         | 7146 (6387, 7957)       | 234.2 (208.2, 261.1) | 6882 (6113, 7711)        | 289.5 (255.7, 326.2) |
| <b>Lithuania</b>      | 11289 (10048, 12561)    | 274.7 (244.3, 306.1) | 12229 (10815, 13774)     | 357.1 (316.4, 404)   |
| <b>Moldova</b>        | 30187 (26913, 33648)    | 654.9 (584.7, 729.8) | 24529 (21639, 27726)     | 524.6 (463.7, 595)   |
| <b>Russia</b>         | 497145 (463511, 531884) | 294.5 (274.4, 315.1) | 671039 (620299, 722651)  | 375.8 (347.3, 405.5) |
| <b>Ukraine</b>        | 178892 (166278, 191617) | 302.4 (281, 323.9)   | 229219 (211712, 248744)  | 416.2 (383.7, 450.9) |
| <b>Central Europe</b> | 658705 (600591, 720759) | 482 (439, 527.7)     | 624506 (565914, 688710)  | 436.1 (393.6, 482.6) |
| <b>Albania</b>        | 12492 (11298, 13697)    | 434 (394.7, 474.4)   | 13493 (12092, 14927)     | 424.2 (380, 472.1)   |

|                               |                         |                      |                         |                      |
|-------------------------------|-------------------------|----------------------|-------------------------|----------------------|
| <b>Bosnia and Herzegovina</b> | 23408 (21251, 25682)    | 482.7 (438.9, 528.8) | 18140 (16246, 20125)    | 427.4 (382.8, 473.9) |
| <b>Bulgaria</b>               | 43168 (39314, 47479)    | 418 (379.6, 461.1)   | 37017 (33309, 40996)    | 414.9 (371.9, 464.4) |
| <b>Croatia</b>                | 34665 (31399, 38077)    | 602.6 (545.7, 661)   | 22683 (20394, 25003)    | 421.5 (378.7, 467)   |
| <b>Czech Republic</b>         | 44530 (40185, 48919)    | 380.8 (344.1, 418.5) | 45524 (41078, 50644)    | 338.8 (305.3, 379)   |
| <b>Hungary</b>                | 80406 (72616, 88126)    | 667.5 (602.2, 731.2) | 56828 (50456, 63501)    | 464.8 (412.9, 522.1) |
| <b>Macedonia</b>              | 7224 (6518, 7986)       | 345.6 (312, 382.4)   | 9948 (8875, 11083)      | 370.7 (330.7, 412.6) |
| <b>Montenegro</b>             | 2066 (1868, 2275)       | 315.9 (284.8, 347.9) | 2509 (2257, 2790)       | 338.3 (303.6, 378)   |
| <b>Poland</b>                 | 173592 (157215, 191236) | 410.5 (372.8, 453.4) | 208605 (187339, 231913) | 435.7 (388.9, 484.7) |
| <b>Romania</b>                | 155877 (141564, 170651) | 614.4 (556.5, 675.4) | 132177 (119009, 146401) | 539.7 (486, 599.3)   |
| <b>Serbia</b>                 | 30203 (27348, 33394)    | 284.7 (256.5, 315.8) | 27817 (24935, 30762)    | 260.9 (233.1, 290.2) |
| <b>Slovakia</b>               | 37073 (33471, 40786)    | 656.3 (593.8, 722.1) | 39077 (34965, 43305)    | 572.8 (510, 634.9)   |
| <b>Slovenia</b>               | 14003 (12685, 15506)    | 611.8 (553.4, 677.3) | 10687 (9626, 11807)     | 402.1 (362.6, 446.4) |
| <b>Central Asia</b>           | 165940 (152290, 179671) | 276.5 (254.2, 299.1) | 290109 (263535, 319352) | 307.4 (280.3, 338.3) |
| <b>Armenia</b>                | 7083 (6517, 7707)       | 212.8 (196.2, 231.4) | 8730 (7904, 9567)       | 247.9 (224.3, 272.1) |
| <b>Azerbaijan</b>             | 17468 (16031, 19030)    | 269.5 (247.7, 293.3) | 32031 (28902, 35468)    | 279.2 (252.7, 308.3) |
| <b>Georgia</b>                | 14631 (13441, 15965)    | 250 (229.1, 272.7)   | 10530 (9331, 11667)     | 248.5 (219.3, 275.9) |
| <b>Kazakhstan</b>             | 33349 (30383, 36305)    | 207.8 (189.7, 226)   | 55138 (49752, 61021)    | 287.2 (259.4, 317.6) |
| <b>Kyrgyzstan</b>             | 12091 (11065, 13115)    | 329.7 (302.1, 357.5) | 20558 (18564, 22711)    | 335.4 (303.9, 369.1) |
| <b>Mongolia</b>               | 5829 (5307, 6406)       | 370.2 (337.4, 404.6) | 10650 (9588, 11873)     | 306 (276, 340)       |
| <b>Tajikistan</b>             | 10691 (9793, 11631)     | 270.1 (248.3, 292.8) | 22793 (20621, 25294)    | 271.8 (246.1, 299.9) |
| <b>Turkmenistan</b>           | 10033 (9196, 10902)     | 351.6 (323.6, 382)   | 19336 (17581, 21292)    | 371.7 (338.8, 408.6) |
| <b>Uzbekistan</b>             | 54764 (50163, 59333)    | 340.7 (312.7, 368)   | 110343 (100113, 121203) | 336.6 (305.7, 368.7) |
| <b>Central Latin America</b>  | 152534 (139327, 166253) | 127.8 (116.7, 139.3) | 315549 (286291, 347568) | 124 (112.6, 136.2)   |
| <b>Colombia</b>               | 18688 (16361, 21183)    | 73.6 (65, 83.1)      | 44400 (38908, 50339)    | 84.1 (73.7, 95.2)    |
| <b>Costa Rica</b>             | 2054 (1801, 2321)       | 87.1 (76.5, 98.2)    | 5232 (4566, 5933)       | 102.8 (89.9, 116.6)  |

|                             |                       |                      |                         |                      |
|-----------------------------|-----------------------|----------------------|-------------------------|----------------------|
| <b>El Salvador</b>          | 4288 (3763, 4878)     | 114.4 (100.6, 130.2) | 7278 (6345, 8345)       | 125 (108.7, 143.3)   |
| <b>Guatemala</b>            | 8024 (7046, 9120)     | 151.6 (133.3, 171.3) | 21590 (18849, 24806)    | 157.4 (138, 180.4)   |
| <b>Honduras</b>             | 4445 (3896, 5075)     | 151.8 (133.2, 172.2) | 11390 (9866, 13117)     | 151.8 (131.5, 174.2) |
| <b>Mexico</b>               | 98599 (91034, 106397) | 161.7 (149.6, 174.4) | 183113 (167984, 199559) | 142.9 (131.3, 155.4) |
| <b>Nicaragua</b>            | 2442 (2147, 2793)     | 105 (92.5, 118.9)    | 6398 (5585, 7386)       | 113.2 (99, 130.4)    |
| <b>Panama</b>               | 1518 (1338, 1707)     | 79.3 (70, 88.9)      | 3821 (3341, 4334)       | 95.2 (83.3, 107.9)   |
| <b>Venezuela</b>            | 12476 (10917, 14181)  | 87.6 (77.4, 99.5)    | 32327 (28347, 37090)    | 101 (88.6, 115.5)    |
| <b>Andean Latin America</b> | 60065 (53452, 67363)  | 214.8 (191.1, 240.6) | 140640 (123823, 158423) | 239.2 (210.5, 269.2) |
| <b>Bolivia</b>              | 9595 (8480, 10845)    | 215 (189.2, 241.4)   | 25533 (22155, 29362)    | 249.7 (216.1, 286.9) |
| <b>Ecuador</b>              | 16178 (14414, 18093)  | 219.5 (196.3, 244.1) | 39738 (35104, 44808)    | 248.3 (219.6, 279.4) |
| <b>Peru</b>                 | 34291 (30313, 38635)  | 212.5 (187.7, 239.6) | 75369 (65914, 84977)    | 231.5 (202.4, 260.6) |
| <b>Caribbean</b>            | 38941 (35960, 42228)  | 129.1 (119, 140.2)   | 69862 (63396, 76430)    | 140.8 (127.6, 154.3) |
| <b>Antigua and Barbuda</b>  | 66 (60, 72)           | 122.2 (111.6, 133.5) | 125 (114, 137)          | 119.4 (108.5, 130.9) |
| <b>The Bahamas</b>          | 296 (269, 327)        | 135.7 (123.7, 148.9) | 550 (498, 604)          | 129.4 (117.4, 142.2) |
| <b>Barbados</b>             | 274 (250, 300)        | 106 (96.8, 115.9)    | 424 (385, 467)          | 113.3 (102.7, 125)   |
| <b>Belize</b>               | 157 (144, 171)        | 132 (121.2, 143.8)   | 516 (469, 567)          | 146.6 (133.6, 161.1) |
| <b>Bermuda</b>              | 71 (65, 78)           | 102.6 (92.9, 112.5)  | 108 (96, 119)           | 119.7 (106.8, 132.4) |
| <b>Cuba</b>                 | 10932 (9940, 11964)   | 100.3 (91.2, 109.7)  | 18420 (16747, 20271)    | 124.2 (112.8, 136.1) |
| <b>Dominica</b>             | 66 (60, 71)           | 104.7 (95.3, 114.1)  | 96 (87, 106)            | 123.7 (111.9, 136.9) |
| <b>Dominican Republic</b>   | 8142 (7439, 8924)     | 155.9 (142.5, 170.5) | 15440 (13884, 17111)    | 148.8 (134, 164.7)   |
| <b>Grenada</b>              | 87 (79, 95)           | 131.5 (119.5, 144.1) | 150 (136, 163)          | 124 (112, 135.6)     |
| <b>Guyana</b>               | 1032 (936, 1130)      | 179.7 (163.7, 196.5) | 1166 (1052, 1294)       | 160.9 (145.3, 178.7) |
| <b>Haiti</b>                | 5727 (5179, 6321)     | 125.7 (113.8, 138.9) | 16826 (14909, 18921)    | 167.3 (149, 187)     |
| <b>Jamaica</b>              | 1764 (1608, 1920)     | 94.3 (85.8, 102.8)   | 3266 (2952, 3602)       | 110.9 (100, 122.2)   |
| <b>Puerto Rico</b>          | 6866 (6264, 7452)     | 189.2 (172.7, 205.4) | 6605 (6003, 7241)       | 141.8 (129.3, 155.3) |

|                                         |                               |                         |                               |                        |
|-----------------------------------------|-------------------------------|-------------------------|-------------------------------|------------------------|
| <b>Saint Lucia</b>                      | 134 (123, 147)                | 133.8 (122.3, 146.3)    | 257 (233, 284)                | 124.3 (112.7, 136.6)   |
| <b>Saint Vincent and the Grenadines</b> | 90 (82, 98)                   | 111.5 (101.8, 122)      | 148 (133, 164)                | 116.8 (105.1, 129.1)   |
| <b>Suriname</b>                         | 472 (431, 513)                | 149.2 (136.6, 162.5)    | 963 (870, 1067)               | 156.5 (141.2, 172.9)   |
| <b>Trinidad and Tobago</b>              | 1290 (1178, 1402)             | 122.9 (112.4, 133.5)    | 2105 (1891, 2323)             | 125.6 (113.1, 138.7)   |
| <b>Virgin Islands</b>                   | 142 (130, 156)                | 132.2 (120.7, 144.1)    | 186 (169, 205)                | 140 (126.7, 154.4)     |
| <b>Tropical Latin America</b>           | 251013 (232973, 268541)       | 197.9 (184.2, 211.4)    | 387413 (358276, 419850)       | 157.2 (145.5, 170.1)   |
| <b>Brazil</b>                           | 246863 (229092, 264089)       | 199.3 (185.6, 212.8)    | 377339 (348829, 409328)       | 157.1 (145.5, 170.2)   |
| <b>Paraguay</b>                         | 4149 (3650, 4687)             | 140.9 (124.4, 158.8)    | 10074 (8819, 11434)           | 158.6 (139, 179.5)     |
| <b>Southern Latin America</b>           | 87970 (81187, 94706)          | 184.4 (170.2, 198.5)    | 141633 (130168, 153571)       | 193.8 (178.1, 210.4)   |
| <b>Argentina</b>                        | 50917 (46802, 55014)          | 157.8 (145, 170.5)      | 87129 (79558, 95186)          | 181.4 (165.5, 198.6)   |
| <b>Chile</b>                            | 32124 (29666, 34766)          | 266 (246, 286.9)        | 47870 (43864, 51925)          | 226.5 (207.7, 246)     |
| <b>Uruguay</b>                          | 4924 (4544, 5304)             | 148.9 (137.2, 160.3)    | 6627 (6065, 7237)             | 168.8 (154.2, 185.1)   |
| <b>East Asia</b>                        | 12786010 (12128637, 13557521) | 1080.8 (1023.6, 1143.9) | 20551191 (19189803, 21983487) | 1064.2 (995.6, 1137.4) |
| <b>China</b>                            | 12120402 (11491947, 12855743) | 1078.8 (1021.2, 1142.1) | 19402687 (18113823, 20757376) | 1056.2 (989, 1129.1)   |
| <b>North Korea</b>                      | 184738 (173011, 197970)       | 922 (865, 985.2)        | 386728 (358284, 416113)       | 1243 (1151, 1335.2)    |
| <b>Taiwan (Province of China)</b>       | 267853 (251108, 285890)       | 1339.7 (1257.7, 1429.5) | 430708 (397912, 465421)       | 1339.7 (1241, 1442.2)  |
| <b>Southeast Asia</b>                   | 614496 (560146, 672495)       | 165.3 (150.2, 181.7)    | 1308329 (1179061, 1455088)    | 185.3 (167.7, 205)     |
| <b>Cambodia</b>                         | 14057 (12885, 15242)          | 204.8 (187.8, 222.9)    | 35293 (31966, 38923)          | 238.3 (215.9, 262.7)   |
| <b>Indonesia</b>                        | 255224 (229662, 282681)       | 171.4 (154.4, 189.8)    | 376117 (336318, 423076)       | 137.9 (124, 154.1)     |
| <b>Laos</b>                             | 4957 (4526, 5412)             | 169.3 (154, 185)        | 13395 (12006, 14835)          | 216.6 (195.4, 239.6)   |
| <b>Malaysia</b>                         | 20414 (18247, 22737)          | 144.3 (128.7, 160)      | 62935 (55068, 71376)          | 200.7 (175.5, 227.1)   |
| <b>Maldives</b>                         | 167 (153, 182)                | 117.7 (107.9, 127.5)    | 739 (669, 821)                | 147.4 (133.7, 162.4)   |
| <b>Mauritius</b>                        | 1852 (1698, 2004)             | 182.4 (167, 197.2)      | 2406 (2182, 2653)             | 153.4 (139.6, 168.7)   |
| <b>Myanmar</b>                          | 70257 (64214, 76241)          | 219.3 (200.2, 237.9)    | 125892 (113426, 139631)       | 229.6 (207.8, 253.8)   |
| <b>Philippines</b>                      | 35850 (32862, 38943)          | 74 (68.4, 80.2)         | 111283 (99208, 122552)        | 116.2 (103.6, 127.6)   |

|                                       |                            |                       |                            |                      |
|---------------------------------------|----------------------------|-----------------------|----------------------------|----------------------|
| <b>Sri Lanka</b>                      | 24435 (22496, 26522)       | 159.9 (147.5, 173.3)  | 42044 (37976, 46346)       | 172.8 (156.7, 190.3) |
| <b>Seychelles</b>                     | 90 (83, 98)                | 148.5 (136.2, 161.1)  | 227 (204, 254)             | 188.3 (170.7, 209.7) |
| <b>Thailand</b>                       | 72612 (61818, 85092)       | 140.4 (119.2, 164.5)  | 155336 (128611, 185075)    | 168 (140.4, 199.2)   |
| <b>East Timor</b>                     | 836 (763, 920)             | 149.6 (136.6, 163.6)  | 2048 (1851, 2262)          | 213.9 (193.3, 236.9) |
| <b>Vietnam</b>                        | 112929 (103700, 122548)    | 224.6 (205.4, 243.8)  | 378893 (343858, 417401)    | 350.5 (319.6, 384.5) |
| <b>Oceania</b>                        | 17420 (16229, 18680)       | 345.1 (321.7, 369.4)  | 41785 (38524, 45235)       | 379.5 (350.1, 409.5) |
| <b>American Samoa</b>                 | 112 (104, 121)             | 290.6 (269.2, 313.5)  | 172 (157, 189)             | 330.1 (300.9, 360.5) |
| <b>Federated States of Micronesia</b> | 294 (272, 317)             | 396.3 (367.4, 425.4)  | 362 (332, 394)             | 376 (345.9, 408.5)   |
| <b>Fiji</b>                           | 1458 (1353, 1565)          | 227.9 (212.3, 244.1)  | 2612 (2412, 2831)          | 285.7 (264.1, 309.5) |
| <b>Guam</b>                           | 492 (457, 530)             | 386.4 (359, 415)      | 708 (653, 767)             | 403.5 (372.9, 436.7) |
| <b>Kiribati</b>                       | 232 (215, 251)             | 388 (358.8, 417.6)    | 434 (399, 472)             | 416.8 (383.8, 453.4) |
| <b>Marshall Islands</b>               | 120 (111, 129)             | 398.2 (369.2, 427.8)  | 212 (194, 230)             | 404.1 (371.8, 438.5) |
| <b>Northern Mariana Islands</b>       | 168 (156, 182)             | 381.1 (356, 410.7)    | 212 (195, 231)             | 401.9 (370.8, 434.9) |
| <b>Papua New Guinea</b>               | 11293 (10504, 12145)       | 356.6 (331.9, 383.8)  | 30671 (28221, 33262)       | 386 (354.6, 416.7)   |
| <b>Samoa</b>                          | 439 (408, 475)             | 360.9 (335.7, 389)    | 643 (592, 698)             | 382.6 (351.9, 415.4) |
| <b>Solomon Islands</b>                | 847 (788, 911)             | 366.8 (341.1, 393.8)  | 2011 (1852, 2189)          | 381.3 (352.4, 412.9) |
| <b>Tonga</b>                          | 281 (262, 302)             | 387.9 (361.9, 417.3)  | 365 (337, 397)             | 396.8 (366.7, 430.8) |
| <b>Vanuatu</b>                        | 534 (494, 579)             | 482.5 (445.6, 522.5)  | 1081 (990, 1177)           | 452.8 (415.9, 492.5) |
| <b>North Africa and Middle East</b>   | 1308356 (1173967, 1448144) | 524.2 (473.5, 580.8)  | 2619892 (2350719, 2927757) | 458.8 (412.6, 509.7) |
| <b>Afghanistan</b>                    | 40715 (37432, 44174)       | 554.9 (511.2, 602.2)  | 123530 (112601, 135173)    | 588 (537.8, 643.1)   |
| <b>Algeria</b>                        | 80087 (73814, 86631)       | 448.1 (414, 484.9)    | 175564 (161110, 191441)    | 426.3 (391.8, 462.6) |
| <b>Bahrain</b>                        | 2197 (2018, 2385)          | 486.1 (449.1, 526.4)  | 7577 (6902, 8298)          | 413.2 (378, 447.3)   |
| <b>Egypt</b>                          | 369401 (305326, 438593)    | 879.6 (728.8, 1035.7) | 515902 (419441, 627425)    | 607.4 (495.7, 737.5) |
| <b>Iran</b>                           | 151291 (137933, 164915)    | 365.9 (335.3, 398.2)  | 335619 (303231, 369709)    | 376.5 (341.5, 412.4) |
| <b>Iraq</b>                           | 47841 (44242, 51722)       | 403.7 (375.5, 435.8)  | 127438 (116544, 138553)    | 359 (329.4, 389.3)   |

|                                    |                            |                      |                            |                      |
|------------------------------------|----------------------------|----------------------|----------------------------|----------------------|
| <b>Jordan</b>                      | 12111 (11150, 13102)       | 487.6 (449.5, 525.4) | 43835 (40121, 47743)       | 467 (428.4, 507.8)   |
| <b>Kuwait</b>                      | 5383 (4948, 5830)          | 333.8 (308.4, 360)   | 16899 (15400, 18518)       | 336 (308.3, 365.8)   |
| <b>Lebanon</b>                     | 14248 (13148, 15352)       | 466.6 (430.7, 501.8) | 38422 (35261, 41690)       | 483.5 (444.5, 523.4) |
| <b>Libya</b>                       | 12974 (11979, 14023)       | 446 (413.4, 481.3)   | 29958 (27324, 32908)       | 428.2 (393.1, 468.3) |
| <b>Morocco</b>                     | 89326 (82848, 96777)       | 453.2 (418.7, 489.7) | 157057 (143272, 170753)    | 431.6 (394.4, 468.7) |
| <b>Palestine</b>                   | 5543 (5121, 6004)          | 430.4 (399.9, 464)   | 16286 (14857, 17744)       | 423.8 (387.7, 460.2) |
| <b>Oman</b>                        | 7124 (6570, 7743)          | 491.6 (454.4, 531)   | 21193 (19260, 23185)       | 426.1 (389.2, 462.3) |
| <b>Qatar</b>                       | 2148 (1955, 2359)          | 487.7 (448.7, 529.3) | 14833 (13481, 16294)       | 440.6 (402.2, 479.9) |
| <b>Saudi Arabia</b>                | 35574 (28808, 43427)       | 313.1 (257.5, 377)   | 99978 (78771, 126116)      | 269 (218.2, 328.3)   |
| <b>Sudan</b>                       | 76686 (70691, 82818)       | 556 (513.5, 600.2)   | 154799 (141351, 169842)    | 526.5 (482, 576.7)   |
| <b>Syria</b>                       | 36065 (33401, 38851)       | 434.8 (404.5, 468.4) | 69555 (63675, 75766)       | 431.6 (395.1, 468.4) |
| <b>Tunisia</b>                     | 22026 (16796, 28141)       | 336.3 (256.5, 431.4) | 41462 (31004, 54594)       | 322.2 (241.3, 420.4) |
| <b>Turkey</b>                      | 246859 (224594, 269545)    | 518.4 (472.8, 563.9) | 457627 (413399, 504038)    | 513.5 (464.7, 564.8) |
| <b>United Arab Emirates</b>        | 8319 (7603, 9115)          | 471 (431.9, 509.8)   | 64606 (57999, 72157)       | 463.7 (423.1, 507.5) |
| <b>Yemen</b>                       | 41597 (38296, 45076)       | 508 (469.3, 548.2)   | 105304 (95494, 115363)     | 477.5 (434.6, 521)   |
| <b>South Asia</b>                  | 1540870 (1422865, 1663771) | 170.1 (157, 183.9)   | 3093938 (2833834, 3386833) | 179.2 (164.3, 195.3) |
| <b>Bangladesh</b>                  | 167898 (154404, 181832)    | 213.4 (197, 230.7)   | 249089 (227394, 272647)    | 163.5 (149.7, 178.7) |
| <b>Bhutan</b>                      | 918 (844, 999)             | 224.3 (205.7, 244.1) | 1687 (1522, 1861)          | 174.1 (157.8, 190.7) |
| <b>India</b>                       | 1203408 (1113263, 1296481) | 163.9 (151.3, 176.4) | 2517500 (2311990, 2744670) | 184.2 (168.7, 200.4) |
| <b>Nepal</b>                       | 21376 (18271, 25142)       | 144.7 (124.2, 169.3) | 32548 (27164, 38563)       | 119.7 (100.3, 141.4) |
| <b>Pakistan</b>                    | 147272 (127847, 169572)    | 190.3 (164.4, 219.4) | 293114 (250317, 343625)    | 164 (140.2, 191.1)   |
| <b>Southern sub-Saharan Africa</b> | 123038 (112266, 134573)    | 315.5 (287.6, 342.8) | 148187 (133628, 164291)    | 205 (185.4, 226.2)   |
| <b>Botswana</b>                    | 2257 (1995, 2563)          | 264.6 (235.9, 297)   | 4655 (4090, 5320)          | 220.1 (193.8, 249.6) |
| <b>Lesotho</b>                     | 3849 (3425, 4362)          | 301.6 (267.8, 340.3) | 4048 (3545, 4636)          | 242.3 (213.1, 277.3) |
| <b>Namibia</b>                     | 1976 (1738, 2245)          | 205.4 (181.9, 231.6) | 4454 (3862, 5138)          | 228.9 (199.3, 262.2) |

|                                   |                            |                         |                            |                        |
|-----------------------------------|----------------------------|-------------------------|----------------------------|------------------------|
| <b>South Africa</b>               | 87503 (80240, 95122)       | 300.5 (275.9, 326)      | 99303 (90602, 108702)      | 181.7 (165.5, 197.8)   |
| <b>Swaziland</b>                  | 1527 (1342, 1734)          | 316.3 (279.1, 357.6)    | 2176 (1905, 2475)          | 248 (218.7, 281.1)     |
| <b>Zimbabwe</b>                   | 25926 (22884, 29150)       | 412.7 (367.1, 461.5)    | 33552 (29189, 38426)       | 308.3 (270.8, 350.9)   |
| <b>Western sub-Saharan Africa</b> | 1114698 (1021113, 1209023) | 869.3 (800.1, 941.8)    | 2344260 (2116621, 2576909) | 804.9 (730.1, 884.4)   |
| <b>Benin</b>                      | 26973 (24698, 29319)       | 919.9 (847.3, 996.1)    | 61323 (55567, 67581)       | 804.7 (735.5, 882.1)   |
| <b>Burkina Faso</b>               | 64821 (59686, 69897)       | 1089 (1005.5, 1166.8)   | 132379 (119129, 146290)    | 952.7 (861.8, 1049.1)  |
| <b>Cameroon</b>                   | 58015 (52837, 63022)       | 861.8 (790.6, 934.7)    | 144561 (130678, 159436)    | 757.8 (686.4, 832.2)   |
| <b>Cape Verde</b>                 | 1616 (1489, 1744)          | 692.7 (641.2, 747.1)    | 3461 (3152, 3776)          | 666.5 (607.5, 726.4)   |
| <b>Chad</b>                       | 37502 (34453, 40542)       | 993.4 (913.3, 1069.9)   | 83587 (76037, 91850)       | 959 (877.8, 1042.8)    |
| <b>Côte d'Ivoire</b>              | 67249 (61300, 73343)       | 870.1 (797.6, 941.4)    | 147118 (132840, 161516)    | 801.1 (729.7, 875.6)   |
| <b>The Gambia</b>                 | 5332 (4871, 5780)          | 877.2 (807.1, 943.9)    | 12116 (10985, 13263)       | 832.4 (757.5, 908.9)   |
| <b>Ghana</b>                      | 77128 (70335, 83765)       | 765.5 (700.9, 826.6)    | 168632 (151048, 186280)    | 706.1 (634.7, 778.4)   |
| <b>Guinea</b>                     | 39786 (36483, 43094)       | 938.3 (863.5, 1015.8)   | 70210 (63603, 77338)       | 896.3 (816.3, 982.2)   |
| <b>Guinea-Bissau</b>              | 6265 (5767, 6777)          | 1001 (924.9, 1079.3)    | 11312 (10258, 12471)       | 897.6 (821.7, 978)     |
| <b>Liberia</b>                    | 13838 (12722, 15005)       | 999.7 (919.7, 1080.9)   | 32572 (29578, 35760)       | 954 (871.3, 1041.7)    |
| <b>Mali</b>                       | 64854 (59658, 70388)       | 1136.8 (1048, 1225.9)   | 134063 (121282, 146568)    | 1078.1 (982, 1177.7)   |
| <b>Mauritania</b>                 | 11186 (10259, 12172)       | 809.3 (744.6, 878.5)    | 20676 (18820, 22659)       | 746.1 (679.1, 817.4)   |
| <b>Niger</b>                      | 49575 (45519, 53783)       | 1035 (955.6, 1119.4)    | 134562 (122220, 147569)    | 1124.7 (1026, 1232.2)  |
| <b>Nigeria</b>                    | 496203 (451687, 545331)    | 795 (723.8, 870.6)      | 996134 (891730, 1104468)   | 731.2 (658.4, 806.5)   |
| <b>São Tomé and Príncipe</b>      | 937 (858, 1012)            | 1209.4 (1111.7, 1310.6) | 1603 (1457, 1763)          | 1024.9 (936.2, 1122.7) |
| <b>Senegal</b>                    | 40214 (36858, 43692)       | 849 (782.2, 917.2)      | 90773 (82612, 99726)       | 872.3 (796.1, 956.6)   |
| <b>Sierra Leone</b>               | 32549 (29913, 35163)       | 1231.8 (1136.5, 1324.1) | 49874 (45045, 54961)       | 907.6 (823.3, 996.4)   |
| <b>Togo</b>                       | 20624 (18989, 22457)       | 940.3 (869.1, 1016.5)   | 49281 (44689, 54301)       | 867.6 (791.2, 951.5)   |
| <b>Eastern sub-Saharan Africa</b> | 530321 (473179, 592646)    | 447.7 (401.2, 501.7)    | 1095551 (969740, 1241424)  | 417.4 (370.2, 470.5)   |
| <b>Burundi</b>                    | 15592 (13770, 17670)       | 437 (387.4, 493)        | 26776 (23381, 30610)       | 364.6 (322, 414.8)     |



|                                   |                         |                      |                         |                      |
|-----------------------------------|-------------------------|----------------------|-------------------------|----------------------|
| <b>Comoros</b>                    | 1086 (956, 1218)        | 366 (322·6, 411·8)   | 2272 (1996, 2586)       | 370·9 (325·8, 420·5) |
| <b>Djibouti</b>                   | 1126 (991, 1267)        | 353·5 (313·6, 395·2) | 3703 (3259, 4205)       | 371·4 (329·3, 419·1) |
| <b>Eritrea</b>                    | 7574 (6658, 8558)       | 421·7 (374·4, 474·8) | 16381 (14283, 18701)    | 380·3 (334·3, 428·8) |
| <b>Ethiopia</b>                   | 150647 (134702, 168092) | 473·9 (424·5, 528·2) | 306992 (272853, 343905) | 458·9 (409·9, 513·3) |
| <b>Kenya</b>                      | 90087 (80547, 100634)   | 690·5 (615·9, 770·8) | 196120 (172968, 223443) | 568·8 (502·7, 642·6) |
| <b>Madagascar</b>                 | 30612 (27137, 34280)    | 394·2 (351·4, 438·9) | 65069 (57128, 73719)    | 359·1 (316·4, 405·5) |
| <b>Malawi</b>                     | 30529 (27055, 34232)    | 493·3 (438·2, 550·2) | 49576 (43244, 56416)    | 425 (372·6, 481)     |
| <b>Mozambique</b>                 | 37835 (33480, 42249)    | 397·5 (354·8, 442·6) | 79136 (68982, 90042)    | 414·3 (364·1, 468·7) |
| <b>Rwanda</b>                     | 13050 (9889, 16955)     | 288·2 (220·5, 370·4) | 18721 (14016, 24256)    | 205·3 (156, 264·8)   |
| <b>Somalia</b>                    | 17433 (15394, 19821)    | 366·5 (325·8, 412·1) | 45733 (40045, 52387)    | 411·2 (361·5, 470·5) |
| <b>South Sudan</b>                | 15889 (14141, 17910)    | 414·1 (369·1, 464·8) | 28438 (25071, 32232)    | 437·7 (387·7, 494·8) |
| <b>Tanzania</b>                   | 58388 (51922, 65416)    | 360·7 (321·7, 402·4) | 128035 (112423, 145773) | 344·6 (303·6, 391)   |
| <b>Uganda</b>                     | 38304 (33934, 43052)    | 374·8 (332·4, 419·5) | 83345 (73393, 95200)    | 352·4 (312·3, 400·5) |
| <b>Zambia</b>                     | 21902 (19413, 24605)    | 466·9 (414·4, 523·3) | 44566 (39045, 50337)    | 382·6 (338·6, 430·3) |
| <b>Central sub-Saharan Africa</b> | 215235 (193438, 238565) | 598·6 (539·1, 658)   | 494194 (440810, 556276) | 580·7 (520·1, 649·9) |
| <b>Angola</b>                     | 43924 (39336, 48877)    | 649·3 (582·5, 721·4) | 103250 (91290, 116676)  | 557·1 (494·4, 625·7) |
| <b>Central African Republic</b>   | 10066 (9025, 11190)     | 540·3 (486·7, 596·9) | 19951 (17630, 22582)    | 565·9 (503·4, 633·7) |
| <b>Congo</b>                      | 8359 (7490, 9275)       | 523·5 (467·5, 580·2) | 20434 (18073, 23066)    | 497·2 (441·9, 554·8) |
| <b>DR Congo</b>                   | 147529 (132488, 163985) | 596·5 (537·4, 656·3) | 339699 (302699, 382376) | 600·4 (537·2, 671·2) |
| <b>Equatorial Guinea</b>          | 1468 (1315, 1629)       | 523·3 (470·4, 580·1) | 4243 (3741, 4791)       | 475·8 (425, 534·4)   |
| <b>Gabon</b>                      | 3889 (3488, 4320)       | 549·9 (493·4, 611·2) | 6616 (5868, 7463)       | 452·3 (401·5, 507)   |

**Appendix Table 22: Number of prevalent cases and age-standardised prevalence rates of compensated cirrhosis due to hepatitis C per 100 000 in 1990 and 2017 for both sexes by location**

|                                  | 1990                          |                       | 2017                          |                         |
|----------------------------------|-------------------------------|-----------------------|-------------------------------|-------------------------|
|                                  | Counts (95% UI)               | Rate (95% UI)         | Counts (95% UI)               | Rate (95% UI)           |
| <b>Global</b>                    | 15562947 (14472714, 16699392) | 327 (303·9, 349·7)    | 27719000 (25515383, 29987680) | 341·1 (314·1, 368·7)    |
| <b>High-income North America</b> | 395271 (370358, 419677)       | 122·9 (115·2, 130·9)  | 615533 (573242, 656658)       | 125·8 (117·8, 134·3)    |
| <b>Canada</b>                    | 29464 (27176, 31952)          | 92·7 (85·4, 100·5)    | 49471 (44713, 54307)          | 96·4 (87·2, 105·6)      |
| <b>Greenland</b>                 | 45 (41, 50)                   | 82·2 (74·9, 90)       | 67 (60, 74)                   | 94·9 (86·2, 104·5)      |
| <b>USA</b>                       | 365753 (342776, 388506)       | 126·3 (118·4, 134·3)  | 565985 (528950, 603277)       | 129·3 (121·2, 137·9)    |
| <b>Australasia</b>               | 32256 (29470, 35150)          | 145 (132·5, 157·8)    | 54582 (49599, 59667)          | 157·9 (143·4, 172·9)    |
| <b>Australia</b>                 | 26465 (23891, 29100)          | 142·3 (128·3, 156·5)  | 45790 (41393, 50345)          | 156·6 (141·3, 172·5)    |
| <b>New Zealand</b>               | 5791 (5405, 6166)             | 158·5 (147·8, 168·6)  | 8792 (8170, 9450)             | 165·1 (153·2, 177·9)    |
| <b>High-income Asia-Pacific</b>  | 2243865 (2136722, 2341918)    | 1110·4 (1056·8, 1159) | 2302801 (2170683, 2429765)    | 893·1 (845·5, 939·8)    |
| <b>Brunei</b>                    | 812 (740, 888)                | 377·5 (347·4, 407·4)  | 2137 (1917, 2354)             | 450·4 (407·8, 493)      |
| <b>Japan</b>                     | 2069200 (1973830, 2155855)    | 1349 (1288, 1406·9)   | 2125771 (2010625, 2242541)    | 1231·3 (1168·8, 1296·4) |
| <b>Singapore</b>                 | 6650 (5541, 7899)             | 196·6 (165·3, 230·5)  | 15046 (12476, 17821)          | 212·6 (176·9, 250·9)    |
| <b>South Korea</b>               | 167203 (143923, 192074)       | 383·3 (331·6, 439·3)  | 159848 (138247, 181533)       | 222·8 (192·1, 253·4)    |
| <b>Western Europe</b>            | 1628087 (1499187, 1756754)    | 356·4 (327·4, 385·3)  | 1913716 (1759252, 2071518)    | 342 (314·3, 371·2)      |
| <b>Andorra</b>                   | 135 (122, 149)                | 206·7 (187·4, 228·7)  | 280 (253, 308)                | 250·8 (227·2, 276·7)    |
| <b>Austria</b>                   | 33381 (30302, 37269)          | 365·9 (331·4, 410·8)  | 39474 (36154, 42987)          | 345·1 (315·4, 375·8)    |
| <b>Belgium</b>                   | 32910 (26783, 39555)          | 274·7 (223·3, 331·2)  | 43538 (34975, 52195)          | 308 (245·6, 372·5)      |
| <b>Cyprus</b>                    | 1264 (1153, 1391)             | 154·1 (140·4, 169·3)  | 2625 (2381, 2870)             | 162·3 (147, 177·3)      |
| <b>Denmark</b>                   | 10449 (9599, 11335)           | 169·9 (155·6, 184·1)  | 17812 (16276, 19463)          | 253 (229·7, 277·2)      |
| <b>Finland</b>                   | 10595 (9732, 11524)           | 174·3 (159·5, 189·5)  | 18638 (17080, 20215)          | 274·6 (250·7, 297·7)    |
| <b>France</b>                    | 170936 (156796, 186197)       | 258·6 (236·1, 282·3)  | 183147 (167490, 199859)       | 230·8 (211, 253·7)      |

|                       |                            |                        |                            |                       |
|-----------------------|----------------------------|------------------------|----------------------------|-----------------------|
| <b>Germany</b>        | 242259 (223903, 261617)    | 245.8 (226.6, 265.8)   | 321476 (294182, 350478)    | 295.4 (269.5, 322.6)  |
| <b>Greece</b>         | 25443 (23468, 27641)       | 206.7 (190, 224.8)     | 27006 (24524, 29578)       | 197.8 (179.5, 217.2)  |
| <b>Iceland</b>        | 135 (92, 191)              | 51.4 (34.9, 72.7)      | 339 (228, 474)             | 84.4 (56.7, 121.4)    |
| <b>Ireland</b>        | 4759 (4352, 5159)          | 131.8 (120.5, 142.8)   | 11797 (10702, 13016)       | 202 (183.5, 222.9)    |
| <b>Israel</b>         | 9849 (9077, 10652)         | 211.2 (194.1, 228.1)   | 23140 (21004, 25338)       | 250 (226.9, 274.4)    |
| <b>Italy</b>          | 727076 (676476, 777237)    | 1048.3 (971.5, 1119.8) | 784482 (725669, 845896)    | 947.7 (878.7, 1021.3) |
| <b>Luxembourg</b>     | 1605 (1471, 1742)          | 336.4 (307.9, 366.3)   | 2570 (2323, 2845)          | 336.6 (304.2, 373.1)  |
| <b>Malta</b>          | 585 (536, 636)             | 137.9 (126.7, 149.9)   | 816 (744, 895)             | 146.2 (132.7, 160.2)  |
| <b>Netherlands</b>    | 30137 (27776, 32675)       | 170.7 (157.1, 185.1)   | 43172 (39148, 47236)       | 201.5 (182.5, 220.3)  |
| <b>Norway</b>         | 10108 (9415, 10790)        | 206.3 (191.7, 220.4)   | 14866 (13762, 16032)       | 231.9 (214.4, 250.1)  |
| <b>Portugal</b>       | 33778 (30467, 37449)       | 296.7 (266.6, 330)     | 26782 (24025, 29715)       | 191.8 (171.1, 211.9)  |
| <b>Spain</b>          | 201755 (167950, 239298)    | 455.5 (376.7, 541.9)   | 216845 (177713, 257342)    | 352.9 (289.5, 418.6)  |
| <b>Sweden</b>         | 17057 (14654, 19446)       | 164.2 (140.1, 188.5)   | 29471 (25420, 33871)       | 237.8 (202.7, 274)    |
| <b>Switzerland</b>    | 13775 (12637, 14880)       | 161.9 (148.4, 175.3)   | 20194 (18340, 22030)       | 180.6 (164.2, 197.6)  |
| <b>United Kingdom</b> | 48526 (44207, 53154)       | 72.6 (65.8, 79.8)      | 83262 (75677, 91977)       | 102.1 (92.1, 112.7)   |
| <b>Eastern Europe</b> | 1091132 (1023112, 1158511) | 425.2 (397.8, 451.3)   | 1716143 (1599028, 1835689) | 649.3 (604, 694)      |
| <b>Belarus</b>        | 41330 (37196, 45555)       | 353.1 (315, 390.4)     | 66749 (59753, 74069)       | 552.8 (493.3, 616.6)  |
| <b>Estonia</b>        | 6302 (5665, 6936)          | 353.4 (317.8, 389.7)   | 8304 (7435, 9207)          | 504.5 (449.2, 561.6)  |
| <b>Latvia</b>         | 10373 (9302, 11457)        | 332.5 (296.4, 367.5)   | 12165 (10938, 13443)       | 493.5 (442, 548.8)    |
| <b>Lithuania</b>      | 16127 (14615, 17818)       | 387.8 (349.7, 428.4)   | 21585 (19373, 23721)       | 607.2 (542.5, 670.8)  |
| <b>Moldova</b>        | 45666 (41192, 50274)       | 990.6 (892.4, 1093)    | 43007 (38375, 47716)       | 902.3 (802.7, 1005.1) |
| <b>Russia</b>         | 712269 (667053, 755613)    | 417.3 (390.3, 442.7)   | 1180813 (1097179, 1262470) | 644.4 (601.5, 688.4)  |
| <b>Ukraine</b>        | 259065 (241358, 276342)    | 428.6 (399.9, 457.9)   | 383520 (355168, 412657)    | 678.1 (626.4, 730.2)  |
| <b>Central Europe</b> | 400664 (356575, 444427)    | 289.2 (257.1, 320.5)   | 461992 (410318, 513811)    | 314 (278.1, 350.2)    |
| <b>Albania</b>        | 7185 (6344, 8022)          | 256.3 (226.9, 285.4)   | 10028 (8856, 11202)        | 308.5 (272.1, 346.8)  |

|                               |                         |                      |                            |                      |
|-------------------------------|-------------------------|----------------------|----------------------------|----------------------|
| <b>Bosnia and Herzegovina</b> | 13899 (12269, 15507)    | 286.3 (252.8, 318.9) | 13442 (11853, 15006)       | 306.6 (269.4, 343.8) |
| <b>Bulgaria</b>               | 25835 (22952, 28746)    | 243.4 (216.6, 271.3) | 27251 (24081, 30174)       | 295.8 (259.4, 330.9) |
| <b>Croatia</b>                | 20371 (17992, 22895)    | 347.2 (307.5, 388.7) | 16317 (14544, 18267)       | 294.4 (258.6, 330.4) |
| <b>Czech Republic</b>         | 27258 (24081, 30320)    | 228.9 (202.3, 254.2) | 34637 (30802, 38657)       | 250.5 (221.1, 280.4) |
| <b>Hungary</b>                | 48829 (43235, 54336)    | 396.9 (350.8, 440.7) | 35961 (31802, 40155)       | 285.9 (251.2, 320.1) |
| <b>Macedonia</b>              | 4296 (3787, 4799)       | 205.4 (181.8, 229.1) | 7239 (6380, 8147)          | 264.2 (232.3, 296.1) |
| <b>Montenegro</b>             | 1224 (1084, 1370)       | 186.7 (165.6, 209)   | 1839 (1627, 2058)          | 241.6 (213.7, 272.1) |
| <b>Poland</b>                 | 105330 (93376, 117805)  | 247.1 (219, 276.2)   | 156204 (138345, 175302)    | 318.1 (280.7, 357)   |
| <b>Romania</b>                | 96656 (86161, 108356)   | 374 (331.1, 419.5)   | 100680 (89231, 112707)     | 399.1 (351.3, 446.3) |
| <b>Serbia</b>                 | 19112 (16900, 21479)    | 176.1 (155.3, 197.7) | 21235 (18875, 23752)       | 194.4 (172.4, 218.2) |
| <b>Slovakia</b>               | 22093 (19481, 24707)    | 389.7 (343.8, 435.9) | 29089 (25645, 32612)       | 416.2 (365, 467)     |
| <b>Slovenia</b>               | 8575 (7578, 9673)       | 370.6 (327.6, 417.2) | 8071 (7172, 9019)          | 294 (258.7, 330.6)   |
| <b>Central Asia</b>           | 153460 (141332, 166459) | 264 (242.8, 285.7)   | 326350 (297196, 357693)    | 348.1 (317.4, 381.8) |
| <b>Armenia</b>                | 6658 (6111, 7261)       | 203.7 (186.4, 221.7) | 10301 (9392, 11310)        | 288.4 (262.6, 316.6) |
| <b>Azerbaijan</b>             | 16461 (15028, 18016)    | 262 (239.5, 286.3)   | 35209 (31777, 38806)       | 305.6 (276.3, 335.9) |
| <b>Georgia</b>                | 14472 (13210, 15744)    | 244.7 (223.2, 266.2) | 11989 (10557, 13291)       | 275.1 (241.1, 305.1) |
| <b>Kazakhstan</b>             | 31805 (29103, 34804)    | 202.3 (185.2, 220.7) | 65287 (58960, 71961)       | 339.3 (306.3, 374)   |
| <b>Kyrgyzstan</b>             | 11176 (10214, 12136)    | 315.2 (287.8, 342.8) | 22909 (20829, 25162)       | 379.8 (346.5, 417)   |
| <b>Mongolia</b>               | 5259 (4756, 5785)       | 352.2 (319.7, 386.4) | 12203 (10970, 13546)       | 354.1 (320.1, 391.4) |
| <b>Tajikistan</b>             | 9775 (8892, 10722)      | 259.8 (236.8, 283.8) | 25048 (22488, 27645)       | 307.3 (277.4, 337.6) |
| <b>Turkmenistan</b>           | 9025 (8220, 9841)       | 333.4 (302.5, 363.4) | 21681 (19619, 23744)       | 420.3 (381.5, 459.2) |
| <b>Uzbekistan</b>             | 48830 (44534, 53290)    | 319.3 (291.7, 347.6) | 121724 (110599, 134818)    | 376.5 (342, 415.8)   |
| <b>Central Latin America</b>  | 789666 (737225, 841284) | 672.4 (628.7, 717.5) | 1854932 (1728568, 1997641) | 728.3 (679.3, 782.9) |
| <b>Colombia</b>               | 80517 (72968, 87967)    | 322.2 (292.3, 353.1) | 226431 (204817, 250893)    | 426.9 (387, 472.2)   |
| <b>Costa Rica</b>             | 9892 (8993, 10839)      | 428.1 (391.6, 469.7) | 29201 (26325, 32424)       | 571.7 (515, 635.3)   |

|                             |                         |                      |                            |                      |
|-----------------------------|-------------------------|----------------------|----------------------------|----------------------|
| <b>El Salvador</b>          | 20279 (18408, 22025)    | 548.5 (496.9, 595.8) | 41278 (37446, 45642)       | 711.7 (645.2, 786)   |
| <b>Guatemala</b>            | 37801 (34673, 40982)    | 722.6 (663.4, 783)   | 118202 (106750, 129958)    | 877.6 (793.2, 962.3) |
| <b>Honduras</b>             | 21047 (19198, 23031)    | 730.8 (665.5, 802.2) | 63542 (57419, 70567)       | 857 (773.3, 949.6)   |
| <b>Mexico</b>               | 541258 (507803, 575506) | 901.3 (847.5, 958.1) | 1149308 (1074480, 1228749) | 895.4 (838, 955.7)   |
| <b>Nicaragua</b>            | 11819 (10736, 12874)    | 518.8 (472.4, 567.3) | 36538 (33173, 40303)       | 652.8 (593.1, 718.7) |
| <b>Panama</b>               | 7388 (6756, 8068)       | 391.3 (358.1, 426.7) | 20888 (18895, 23014)       | 518.9 (471.5, 571.5) |
| <b>Venezuela</b>            | 59665 (54075, 65247)    | 427.1 (388.2, 466.8) | 169545 (153712, 187582)    | 529.4 (480.3, 584.7) |
| <b>Andean Latin America</b> | 56022 (49668, 62540)    | 201.7 (178.8, 225.9) | 159314 (140354, 179911)    | 271.3 (239.5, 306.6) |
| <b>Bolivia</b>              | 8931 (7881, 10098)      | 201.4 (177, 228.5)   | 29723 (25964, 33740)       | 291.5 (254.8, 330.8) |
| <b>Ecuador</b>              | 15012 (13275, 16707)    | 205.3 (181.8, 228.1) | 46719 (41110, 52803)       | 292.2 (257.5, 329.4) |
| <b>Peru</b>                 | 32079 (28289, 35965)    | 200.1 (176.1, 225.5) | 82872 (72625, 94089)       | 254.8 (224, 289)     |
| <b>Caribbean</b>            | 78788 (73355, 84634)    | 264.3 (245.8, 283.4) | 161605 (148237, 175739)    | 323.7 (297.2, 351.9) |
| <b>Antigua and Barbuda</b>  | 132 (122, 143)          | 250.7 (231.6, 271.2) | 308 (283, 337)             | 291.2 (267.4, 316.8) |
| <b>The Bahamas</b>          | 596 (547, 648)          | 278.8 (257.3, 302.3) | 1339 (1230, 1468)          | 312 (287.2, 340.9)   |
| <b>Barbados</b>             | 548 (505, 592)          | 215.8 (198.8, 233.3) | 1034 (945, 1129)           | 270.4 (246.6, 295.4) |
| <b>Belize</b>               | 314 (290, 339)          | 269.9 (249.6, 292.4) | 1216 (1116, 1322)          | 348.3 (319.6, 378.1) |
| <b>Bermuda</b>              | 145 (132, 159)          | 209.9 (191.4, 229.6) | 228 (209, 250)             | 247.8 (226.5, 271)   |
| <b>Cuba</b>                 | 22442 (20687, 24184)    | 207.5 (191.1, 223.4) | 45607 (41801, 49573)       | 300 (276.1, 325.8)   |
| <b>Dominica</b>             | 134 (124, 145)          | 216.2 (199.3, 233.1) | 224 (206, 243)             | 283.7 (260.3, 308.3) |
| <b>Dominican Republic</b>   | 16488 (15138, 17858)    | 322.4 (297.2, 350.8) | 35703 (32286, 39048)       | 345.8 (313.6, 378.6) |
| <b>Grenada</b>              | 174 (161, 187)          | 266.9 (246, 287.6)   | 360 (331, 390)             | 296.1 (271.8, 321.5) |
| <b>Guyana</b>               | 2008 (1843, 2195)       | 358.3 (327.6, 389)   | 2800 (2560, 3054)          | 384.1 (352.1, 418.4) |
| <b>Haiti</b>                | 11531 (10585, 12595)    | 256.7 (235.5, 280)   | 34462 (31111, 38016)       | 348.8 (315.8, 384)   |
| <b>Jamaica</b>              | 3537 (3281, 3808)       | 192.3 (177.9, 206.8) | 7900 (7259, 8632)          | 267.8 (245.7, 292.5) |
| <b>Puerto Rico</b>          | 13780 (12730, 14910)    | 381 (352, 412.1)     | 16162 (14890, 17453)       | 342.1 (313.3, 370.2) |

|                                         |                            |                      |                            |                      |
|-----------------------------------------|----------------------------|----------------------|----------------------------|----------------------|
| <b>Saint Lucia</b>                      | 272 (252, 294)             | 277.7 (255.7, 301.3) | 624 (570, 679)             | 299.1 (273.8, 325.4) |
| <b>Saint Vincent and the Grenadines</b> | 177 (163, 191)             | 225.1 (206.6, 244.4) | 353 (323, 386)             | 275.2 (251.6, 300.1) |
| <b>Suriname</b>                         | 961 (885, 1038)            | 305.9 (280.9, 330.9) | 2192 (2002, 2378)          | 352.4 (323.4, 382.8) |
| <b>Trinidad and Tobago</b>              | 2558 (2362, 2766)          | 248.3 (229.9, 268.5) | 4830 (4429, 5274)          | 285 (261.2, 311.4)   |
| <b>Virgin Islands</b>                   | 294 (267, 321)             | 272.8 (249.6, 296.9) | 453 (416, 495)             | 332.5 (304.7, 363.4) |
| <b>Tropical Latin America</b>           | 409108 (383162, 435223)    | 325.7 (306.1, 345.2) | 738733 (688733, 791599)    | 299.1 (279.1, 320.1) |
| <b>Brazil</b>                           | 402856 (377481, 428635)    | 328.4 (308.5, 348)   | 721144 (672385, 772639)    | 299.7 (279.6, 320.4) |
| <b>Paraguay</b>                         | 6251 (5606, 6922)          | 214.9 (193.4, 238)   | 17589 (15777, 19672)       | 278.1 (249.7, 311.2) |
| <b>Southern Latin America</b>           | 169768 (158544, 180627)    | 356.6 (333, 379.5)   | 312995 (290033, 335486)    | 426.3 (395.2, 457.5) |
| <b>Argentina</b>                        | 98453 (91932, 104942)      | 304.6 (283.8, 324.8) | 190407 (175337, 205975)    | 396.5 (365, 429.2)   |
| <b>Chile</b>                            | 61687 (57366, 65977)       | 518.1 (482.3, 554.3) | 107796 (99685, 115851)     | 502.4 (464.9, 539.3) |
| <b>Uruguay</b>                          | 9622 (8960, 10228)         | 289 (268.8, 307.8)   | 14778 (13652, 15915)       | 372.6 (344.5, 401.5) |
| <b>East Asia</b>                        | 3780313 (3465148, 4111873) | 324.9 (298, 352.5)   | 7301772 (6647724, 7955290) | 370.3 (338.2, 403.1) |
| <b>China</b>                            | 3524343 (3231731, 3835862) | 318.9 (292.7, 345.7) | 6770357 (6156257, 7382194) | 360.9 (329.2, 393.4) |
| <b>North Korea</b>                      | 63627 (57836, 69702)       | 316.8 (288.7, 346.5) | 154613 (139986, 169613)    | 489.5 (445.1, 537.1) |
| <b>Taiwan (Province of China)</b>       | 129363 (113853, 146107)    | 657.4 (578.9, 741.4) | 259174 (227018, 291580)    | 786 (691.2, 883.8)   |
| <b>Southeast Asia</b>                   | 610254 (558763, 663530)    | 166.2 (151.8, 180.5) | 1328453 (1200835, 1459855) | 187.3 (170, 205.6)   |
| <b>Cambodia</b>                         | 10638 (9713, 11625)        | 157.9 (143.8, 173.2) | 31109 (28210, 34360)       | 211.2 (191.5, 232.6) |
| <b>Indonesia</b>                        | 360937 (331086, 391177)    | 244.8 (224, 264.9)   | 579392 (523161, 633852)    | 211.6 (192.8, 231.2) |
| <b>Laos</b>                             | 3426 (3113, 3786)          | 118.5 (107.1, 130.8) | 10217 (9234, 11346)        | 167.1 (151, 184.5)   |
| <b>Malaysia</b>                         | 8248 (6769, 9857)          | 59.3 (48.8, 70.3)    | 29291 (23960, 35195)       | 93.8 (77.1, 112.6)   |
| <b>Maldives</b>                         | 122 (111, 133)             | 86.9 (79.5, 94.6)    | 629 (564, 699)             | 128.5 (117, 141.6)   |
| <b>Mauritius</b>                        | 1364 (1245, 1486)          | 136.9 (125.3, 148.7) | 2157 (1959, 2371)          | 135 (123, 148.4)     |
| <b>Myanmar</b>                          | 49956 (45300, 54815)       | 158.2 (142.7, 174.5) | 107965 (97060, 119514)     | 196.5 (177.1, 217.2) |
| <b>Philippines</b>                      | 24767 (22731, 27068)       | 52.1 (47.8, 56.7)    | 91705 (81892, 101106)      | 96 (85.7, 105.7)     |

|                                       |                            |                         |                            |                        |
|---------------------------------------|----------------------------|-------------------------|----------------------------|------------------------|
| <b>Sri Lanka</b>                      | 18309 (16766, 19997)       | 121.3 (111.2, 132.1)    | 38111 (34585, 41905)       | 155.1 (141.3, 170.1)   |
| <b>Seychelles</b>                     | 67 (61, 73)                | 112.1 (102.2, 122.3)    | 202 (181, 224)             | 165.8 (150.2, 182.9)   |
| <b>Thailand</b>                       | 53563 (44429, 64024)       | 104.5 (87, 124)         | 132078 (108025, 159739)    | 140.4 (115.6, 168.8)   |
| <b>East Timor</b>                     | 597 (543, 661)             | 109 (99, 120.2)         | 1650 (1501, 1825)          | 174.2 (157.6, 193.4)   |
| <b>Vietnam</b>                        | 77449 (71068, 84628)       | 156.8 (143.2, 171.1)    | 302201 (272217, 334897)    | 278.1 (251.3, 306.5)   |
| <b>Oceania</b>                        | 7825 (7215, 8458)          | 158.3 (146.4, 170.4)    | 21985 (20054, 23934)       | 202.3 (186, 220.2)     |
| <b>American Samoa</b>                 | 52 (48, 57)                | 137.3 (126.8, 149.6)    | 86 (78, 94)                | 162.5 (147.5, 178.5)   |
| <b>Federated States of Micronesia</b> | 128 (117, 140)             | 177.6 (162.6, 192.9)    | 198 (181, 217)             | 205.6 (188.8, 224.8)   |
| <b>Fiji</b>                           | 697 (640, 755)             | 111.2 (102.8, 120)      | 1517 (1385, 1651)          | 165.3 (151.4, 179.3)   |
| <b>Guam</b>                           | 234 (215, 253)             | 187.6 (173.4, 202.3)    | 357 (327, 390)             | 200.4 (183.5, 218.3)   |
| <b>Kiribati</b>                       | 99 (91, 107)               | 169.1 (155.2, 183.7)    | 218 (198, 239)             | 211.7 (192.8, 232)     |
| <b>Marshall Islands</b>               | 52 (48, 57)                | 180.5 (165.6, 195.8)    | 110 (100, 120)             | 211.2 (193.5, 231)     |
| <b>Northern Mariana Islands</b>       | 79 (72, 86)                | 183.5 (168.7, 198.3)    | 110 (100, 120)             | 198.5 (181.6, 215.4)   |
| <b>Papua New Guinea</b>               | 5055 (4632, 5499)          | 163.1 (150.1, 176.3)    | 16042 (14601, 17523)       | 205.2 (188.3, 224)     |
| <b>Samoa</b>                          | 195 (179, 212)             | 163.2 (150.1, 177.1)    | 332 (301, 363)             | 197.3 (180, 216.4)     |
| <b>Solomon Islands</b>                | 369 (339, 400)             | 163 (149.7, 176.4)      | 1056 (961, 1154)           | 203.7 (186.4, 222.5)   |
| <b>Tonga</b>                          | 128 (118, 139)             | 178.3 (164, 192.5)      | 204 (186, 223)             | 222.1 (203, 242.7)     |
| <b>Vanuatu</b>                        | 221 (202, 242)             | 204.6 (187.3, 224)      | 543 (493, 596)             | 231 (209.6, 253.3)     |
| <b>North Africa and Middle East</b>   | 1519854 (1390124, 1658846) | 618.6 (566.7, 673)      | 3665267 (3354878, 4004934) | 643.2 (591.9, 700.7)   |
| <b>Afghanistan</b>                    | 47706 (44063, 51514)       | 633.6 (585.8, 684.3)    | 152340 (139498, 165457)    | 746.4 (688.6, 806.4)   |
| <b>Algeria</b>                        | 96666 (89724, 103911)      | 555.6 (516.1, 596.7)    | 259606 (240022, 282026)    | 637.5 (591, 690.2)     |
| <b>Bahrain</b>                        | 2513 (2315, 2717)          | 596 (554.4, 635.7)      | 11055 (10151, 12004)       | 612.7 (567.2, 662)     |
| <b>Egypt</b>                          | 547770 (474960, 617451)    | 1323.8 (1154.8, 1490.8) | 930947 (816457, 1056716)   | 1102.4 (971.9, 1245.7) |
| <b>Iran</b>                           | 191322 (176993, 207342)    | 471.3 (438, 506.8)      | 501829 (462874, 542767)    | 572.1 (528.9, 617)     |
| <b>Iraq</b>                           | 56485 (52367, 60876)       | 490.4 (455.8, 525)      | 172800 (159886, 186356)    | 496.1 (460.3, 531.2)   |

|                                    |                          |                      |                            |                       |
|------------------------------------|--------------------------|----------------------|----------------------------|-----------------------|
| <b>Jordan</b>                      | 14511 (13437, 15598)     | 601.6 (560, 645)     | 65881 (60759, 71290)       | 713.7 (662.6, 771.2)  |
| <b>Kuwait</b>                      | 6215 (5721, 6701)        | 408.2 (380.3, 435.5) | 24904 (22840, 27299)       | 508.4 (470.2, 551.7)  |
| <b>Lebanon</b>                     | 15918 (14819, 17071)     | 528.4 (492.9, 565.5) | 48813 (45269, 52795)       | 629.2 (583.9, 680.4)  |
| <b>Libya</b>                       | 15697 (14504, 16882)     | 553.8 (514, 594.6)   | 44995 (41475, 48998)       | 653.9 (603.2, 709.3)  |
| <b>Morocco</b>                     | 106177 (98438, 113787)   | 551.6 (512.2, 591.1) | 235977 (218057, 255191)    | 648 (599.2, 701.4)    |
| <b>Palestine</b>                   | 6610 (6140, 7113)        | 529.4 (493.2, 568.7) | 23236 (21490, 25118)       | 616.9 (572.9, 663.6)  |
| <b>Oman</b>                        | 7693 (7120, 8336)        | 563.2 (524, 604.2)   | 29171 (26702, 31732)       | 624.7 (578.2, 671.1)  |
| <b>Qatar</b>                       | 2386 (2181, 2601)        | 585.5 (541.5, 630.2) | 20068 (18286, 22045)       | 631.2 (583.1, 683)    |
| <b>Saudi Arabia</b>                | 96104 (86791, 106109)    | 869.1 (792.6, 952.3) | 335898 (300542, 373955)    | 931.4 (840.6, 1024.6) |
| <b>Sudan</b>                       | 86336 (80053, 93427)     | 642.8 (596.2, 693.1) | 207484 (190868, 225504)    | 723.5 (668.1, 783.7)  |
| <b>Syria</b>                       | 43278 (40126, 46463)     | 535 (500.1, 572)     | 102800 (95085, 110888)     | 634.1 (587.5, 683.8)  |
| <b>Tunisia</b>                     | 28482 (22779, 34353)     | 434.3 (345.8, 522.5) | 65464 (52610, 79022)       | 506.9 (409.8, 608.5)  |
| <b>Turkey</b>                      | 87715 (74991, 101721)    | 187.6 (159.8, 217.3) | 190389 (162429, 220816)    | 212.4 (182.1, 246)    |
| <b>United Arab Emirates</b>        | 9135 (8388, 9949)        | 563.4 (522.5, 607.8) | 87183 (79087, 96070)       | 662 (610.6, 719.6)    |
| <b>Yemen</b>                       | 50154 (46470, 54119)     | 630.7 (587.1, 679.7) | 151004 (138481, 164319)    | 708.8 (653, 766.9)    |
| <b>South Asia</b>                  | 944643 (863189, 1032373) | 105.7 (96.4, 115.7)  | 2020503 (1830433, 2224217) | 117.9 (106.6, 129.6)  |
| <b>Bangladesh</b>                  | 114101 (104658, 124337)  | 147.5 (135.6, 159.8) | 205553 (188492, 225493)    | 135.9 (124.6, 148.9)  |
| <b>Bhutan</b>                      | 591 (542, 641)           | 146.6 (134.9, 159.2) | 1314 (1194, 1444)          | 139.2 (126.8, 152.3)  |
| <b>India</b>                       | 609804 (555839, 665766)  | 84.1 (76.7, 91.8)    | 1302550 (1177682, 1438571) | 96.1 (86.8, 106)      |
| <b>Nepal</b>                       | 9863 (7975, 11783)       | 67.5 (54.9, 80.4)    | 17519 (14278, 21132)       | 64.8 (53, 78.5)       |
| <b>Pakistan</b>                    | 210284 (186910, 235947)  | 274.4 (242.8, 307)   | 493568 (438086, 556780)    | 280.1 (249.5, 314.4)  |
| <b>Southern sub-Saharan Africa</b> | 112003 (101927, 122690)  | 292.2 (266.7, 318)   | 170604 (154621, 187816)    | 238.5 (216.7, 261.9)  |
| <b>Botswana</b>                    | 2190 (1934, 2486)        | 262 (232.1, 295.4)   | 5660 (4959, 6406)          | 271.6 (239.3, 304.5)  |
| <b>Lesotho</b>                     | 3470 (3053, 3923)        | 275.7 (242.8, 311.3) | 4656 (4085, 5274)          | 284.7 (251.3, 320.7)  |
| <b>Namibia</b>                     | 2051 (1804, 2317)        | 217.6 (192.2, 244.3) | 4796 (4203, 5443)          | 250.6 (219.5, 282.6)  |



|                                   |                         |                      |                            |                      |
|-----------------------------------|-------------------------|----------------------|----------------------------|----------------------|
| <b>South Africa</b>               | 81258 (74549, 88271)    | 283.5 (260.8, 307.6) | 117506 (107732, 128314)    | 216.5 (199.3, 235.9) |
| <b>Swaziland</b>                  | 1451 (1269, 1646)       | 306.4 (270.9, 343.9) | 2545 (2220, 2891)          | 297.3 (262.5, 334.9) |
| <b>Zimbabwe</b>                   | 21583 (19096, 24279)    | 350.9 (311.6, 392.4) | 35442 (30857, 40147)       | 332.3 (291.7, 375.3) |
| <b>Western sub-Saharan Africa</b> | 305877 (264715, 350052) | 245.8 (213, 280.8)   | 670924 (573171, 779012)    | 236.5 (203.6, 272.7) |
| <b>Benin</b>                      | 6748 (5829, 7787)       | 240.2 (207.4, 274.2) | 17191 (14697, 19908)       | 233.4 (200.6, 270.3) |
| <b>Burkina Faso</b>               | 14912 (12931, 17143)    | 257 (222.4, 295.1)   | 36715 (31372, 42549)       | 271.7 (232.9, 313.1) |
| <b>Cameroon</b>                   | 16095 (13870, 18564)    | 246 (213, 282.3)     | 43112 (36858, 50398)       | 233.8 (201.9, 271.4) |
| <b>Cape Verde</b>                 | 407 (357, 461)          | 185.4 (161.4, 211.7) | 1101 (951, 1265)           | 215.9 (187.6, 245.6) |
| <b>Chad</b>                       | 8793 (7633, 10035)      | 241 (209.4, 274.7)   | 20270 (17255, 23408)       | 240.5 (205.8, 277.6) |
| <b>Côte d'Ivoire</b>              | 17453 (14862, 20318)    | 235.7 (202.8, 270.1) | 42189 (35955, 49169)       | 236.4 (203.3, 272.4) |
| <b>The Gambia</b>                 | 1293 (1114, 1494)       | 222.5 (192, 255.9)   | 3380 (2880, 3947)          | 241.1 (207.5, 278.3) |
| <b>Ghana</b>                      | 22768 (19595, 26072)    | 233 (201.4, 265.7)   | 55070 (47026, 64110)       | 236 (203.3, 272.7)   |
| <b>Guinea</b>                     | 10007 (8653, 11546)     | 241.3 (208.8, 277.5) | 18092 (15433, 21033)       | 238.5 (203.6, 276.6) |
| <b>Guinea-Bissau</b>              | 1516 (1301, 1748)       | 251.1 (216.5, 287.6) | 2786 (2366, 3251)          | 230.6 (197.4, 266)   |
| <b>Liberia</b>                    | 3573 (3078, 4081)       | 261 (226, 298)       | 8047 (6807, 9426)          | 240.6 (205.3, 280.3) |
| <b>Mali</b>                       | 16096 (13835, 18630)    | 287.9 (247.7, 332)   | 34220 (29387, 39760)       | 283.5 (243.1, 328.1) |
| <b>Mauritania</b>                 | 3003 (2599, 3441)       | 224.6 (194.9, 256.7) | 6007 (5176, 6990)          | 221.8 (190.5, 256.4) |
| <b>Niger</b>                      | 11598 (9888, 13427)     | 250.4 (215.5, 287.6) | 31309 (26848, 36352)       | 270.9 (231.7, 313.5) |
| <b>Nigeria</b>                    | 149392 (128326, 172299) | 246.1 (211.4, 282)   | 300875 (254756, 349573)    | 225.8 (194.4, 261.2) |
| <b>São Tomé and Príncipe</b>      | 243 (211, 277)          | 326.4 (281.2, 374.8) | 476 (406, 552)             | 310.2 (266.8, 359.1) |
| <b>Senegal</b>                    | 9326 (8103, 10744)      | 204.3 (177.5, 234.2) | 23713 (20224, 27530)       | 233.8 (200.1, 270.5) |
| <b>Sierra Leone</b>               | 7462 (6394, 8593)       | 292.4 (251.7, 335.7) | 13596 (11576, 15927)       | 256.3 (220.7, 296.6) |
| <b>Togo</b>                       | 5184 (4458, 5985)       | 246.6 (212.9, 282.5) | 12768 (10834, 14934)       | 229 (196, 265.9)     |
| <b>Eastern sub-Saharan Africa</b> | 678608 (611643, 748680) | 588.7 (530.8, 646)   | 1515372 (1358843, 1682760) | 595.5 (533.5, 658.5) |
| <b>Burundi</b>                    | 22371 (19900, 24947)    | 654.1 (582.8, 728)   | 44848 (39888, 50558)       | 633.2 (562.1, 707.9) |

|                                   |                         |                        |                         |                      |
|-----------------------------------|-------------------------|------------------------|-------------------------|----------------------|
| <b>Comoros</b>                    | 1536 (1371, 1716)       | 531.8 (473.9, 591.1)   | 3719 (3311, 4166)       | 617 (549.4, 687.6)   |
| <b>Djibouti</b>                   | 1528 (1365, 1708)       | 505.3 (452.5, 560.8)   | 5550 (4906, 6224)       | 571.3 (509.6, 637.1) |
| <b>Eritrea</b>                    | 10396 (9214, 11656)     | 603.6 (537.8, 671.9)   | 27046 (24007, 30281)    | 654.9 (585.2, 731.3) |
| <b>Ethiopia</b>                   | 202042 (183729, 221001) | 650.7 (593.1, 711.4)   | 406739 (368684, 447358) | 628.7 (572.7, 687.7) |
| <b>Kenya</b>                      | 50318 (43471, 57774)    | 396.9 (342.1, 452.1)   | 134478 (115392, 155977) | 398.7 (343.7, 457.8) |
| <b>Madagascar</b>                 | 42515 (38175, 47216)    | 567 (508.7, 626.7)     | 105071 (94025, 117697)  | 597.2 (536.6, 665.1) |
| <b>Malawi</b>                     | 40118 (35905, 44723)    | 672.9 (600.7, 746.3)   | 76975 (68433, 86380)    | 689.6 (614.1, 769.1) |
| <b>Mozambique</b>                 | 44502 (39713, 49527)    | 479.2 (426.8, 529.4)   | 108996 (96744, 122418)  | 593.2 (527.4, 663.4) |
| <b>Rwanda</b>                     | 46199 (39961, 52616)    | 1038.9 (909.2, 1164.9) | 78533 (67645, 89758)    | 876.1 (766.3, 983.4) |
| <b>Somalia</b>                    | 25962 (23133, 29227)    | 558.8 (499, 622.6)     | 67365 (59572, 75843)    | 631.8 (562.8, 706.4) |
| <b>South Sudan</b>                | 20944 (18630, 23366)    | 566.2 (502.5, 630.4)   | 39169 (34587, 44287)    | 617 (545, 690.5)     |
| <b>Tanzania</b>                   | 84315 (75513, 93117)    | 537.8 (481.7, 590.3)   | 209975 (186385, 236195) | 583 (520, 651.8)     |
| <b>Uganda</b>                     | 54425 (48429, 60481)    | 553.6 (493.3, 614.1)   | 135244 (120539, 151761) | 597 (531.3, 664.7)   |
| <b>Zambia</b>                     | 31093 (27811, 34451)    | 685.3 (611.1, 756.5)   | 70713 (62673, 79156)    | 633.6 (563.3, 703.8) |
| <b>Central sub-Saharan Africa</b> | 155482 (137587, 175615) | 443.8 (393.9, 498)     | 405425 (355265, 457994) | 487 (428.8, 548.5)   |
| <b>Angola</b>                     | 30948 (27161, 35028)    | 469.4 (413.4, 529.5)   | 88722 (77585, 100859)   | 489.3 (429.5, 551)   |
| <b>Central African Republic</b>   | 7384 (6471, 8423)       | 406.3 (358.7, 458.9)   | 15551 (13440, 17676)    | 448.5 (389.4, 508.1) |
| <b>Congo</b>                      | 6672 (5892, 7506)       | 429.8 (378.1, 481.2)   | 17815 (15565, 20209)    | 438.8 (385.7, 495.5) |
| <b>DR Congo</b>                   | 106076 (93668, 119687)  | 440.1 (389.3, 492.8)   | 273395 (240145, 309291) | 494.4 (435.4, 555.8) |
| <b>Equatorial Guinea</b>          | 1111 (974, 1261)        | 402.1 (354.3, 454.3)   | 3535 (3068, 4017)       | 413.7 (362.9, 466.1) |
| <b>Gabon</b>                      | 3291 (2908, 3699)       | 476.7 (421.2, 533.9)   | 6406 (5589, 7243)       | 443.7 (391.1, 500.8) |

**Appendix Table 23: Number of prevalent cases and age-standardised prevalence rates of compensated cirrhosis due to alcohol-related liver disease per 100 000 in 1990 and 2017 for both sexes by location**

|                                  | 1990                          |                        | 2017                          |                      |
|----------------------------------|-------------------------------|------------------------|-------------------------------|----------------------|
|                                  | Counts (95% UI)               | Rate (95% UI)          | Counts (95% UI)               | Rate (95% UI)        |
| <b>Global</b>                    | 13488036 (12642698, 14408446) | 290 (271.9, 309.9)     | 23590407 (21884257, 25482908) | 288.1 (267.5, 311.3) |
| <b>High-income North America</b> | 305887 (286978, 326982)       | 95.2 (89.2, 102.1)     | 494656 (458731, 532120)       | 97.8 (90.6, 105)     |
| <b>Canada</b>                    | 28087 (25627, 30729)          | 88.4 (80.6, 96.8)      | 48909 (43807, 54475)          | 91.6 (82.1, 101.6)   |
| <b>Greenland</b>                 | 37 (33, 41)                   | 69.9 (63.1, 76.9)      | 61 (54, 68)                   | 83.5 (74.8, 93)      |
| <b>USA</b>                       | 277756 (260831, 296482)       | 96 (90.1, 102.8)       | 445677 (413789, 478503)       | 98.5 (91.5, 105.6)   |
| <b>Australasia</b>               | 27325 (24682, 29935)          | 122.3 (110.4, 134.2)   | 45771 (41276, 50431)          | 127.1 (114.4, 140.6) |
| <b>Australia</b>                 | 22529 (20277, 24875)          | 120.6 (108.3, 133.3)   | 38384 (34420, 42641)          | 126.3 (113.4, 140.3) |
| <b>New Zealand</b>               | 4797 (4416, 5194)             | 130.8 (120.5, 141.8)   | 7387 (6748, 8051)             | 131.5 (120.3, 143.7) |
| <b>High-income Asia-Pacific</b>  | 1112974 (1019399, 1210847)    | 545.2 (499.2, 593.2)   | 1107930 (1013299, 1210597)    | 422.1 (384.4, 461.4) |
| <b>Brunei</b>                    | 705 (632, 784)                | 355.9 (321.5, 391.6)   | 1928 (1716, 2163)             | 408.8 (368, 454.9)   |
| <b>Japan</b>                     | 503246 (469655, 538760)       | 313.7 (292.7, 336.1)   | 514272 (476081, 552637)       | 277.6 (257.6, 299.6) |
| <b>Singapore</b>                 | 7501 (6259, 8935)             | 228 (192.3, 270.7)     | 17135 (14343, 20397)          | 236.9 (198.6, 280.9) |
| <b>South Korea</b>               | 601522 (531038, 670926)       | 1412.3 (1246.9, 1571)  | 574595 (511411, 642117)       | 758.4 (676.7, 848.4) |
| <b>Western Europe</b>            | 2853257 (2688362, 3019374)    | 617.9 (581.8, 655.8)   | 3344353 (3108094, 3586975)    | 582.5 (542.8, 625.4) |
| <b>Andorra</b>                   | 365 (338, 394)                | 563.7 (522.9, 609.1)   | 706 (649, 769)                | 605.7 (557.1, 659.1) |
| <b>Austria</b>                   | 95802 (89504, 105027)         | 1037.6 (969.4, 1135.5) | 108326 (101154, 115910)       | 910.4 (851.8, 973.6) |
| <b>Belgium</b>                   | 69226 (62350, 76331)          | 567.2 (507.5, 627.6)   | 90535 (80616, 100604)         | 613.8 (544.6, 686.5) |
| <b>Cyprus</b>                    | 3031 (2813, 3268)             | 369.9 (343.5, 398.7)   | 6083 (5615, 6610)             | 370 (342.1, 402.4)   |
| <b>Denmark</b>                   | 29894 (28046, 31724)          | 477.1 (447.5, 506.3)   | 51073 (47467, 55096)          | 696.2 (649.6, 750.9) |
| <b>Finland</b>                   | 24591 (22997, 26229)          | 396.5 (370.1, 422.9)   | 44655 (41356, 48161)          | 633.7 (588.5, 682.5) |
| <b>France</b>                    | 532149 (501218, 564827)       | 795.3 (749.4, 843.9)   | 504574 (468112, 543703)       | 611.3 (569.3, 658.6) |

|                       |                            |                        |                            |                       |
|-----------------------|----------------------------|------------------------|----------------------------|-----------------------|
| <b>Germany</b>        | 731460 (693139, 774275)    | 728.1 (690.3, 771.1)   | 895658 (830808, 961933)    | 787.9 (731.8, 846.5)  |
| <b>Greece</b>         | 70239 (65690, 74572)       | 557.4 (521.1, 591.5)   | 69701 (64115, 74992)       | 487.5 (449.6, 525.6)  |
| <b>Iceland</b>        | 525 (458, 597)             | 200.1 (174.7, 227.8)   | 1404 (1225, 1592)          | 345.5 (299.9, 393.8)  |
| <b>Ireland</b>        | 11039 (10218, 11825)       | 305.3 (283, 327.6)     | 30048 (27675, 32747)       | 498.4 (459.2, 543.8)  |
| <b>Israel</b>         | 16148 (15026, 17288)       | 348.9 (325.2, 373.8)   | 38358 (35308, 41729)       | 409.9 (376.6, 446.3)  |
| <b>Italy</b>          | 330369 (294249, 368856)    | 466.9 (414.4, 522.9)   | 297200 (266263, 328914)    | 342.3 (305.4, 380.9)  |
| <b>Luxembourg</b>     | 4089 (3837, 4350)          | 846.5 (793.4, 901)     | 7394 (6832, 8015)          | 938.3 (867.2, 1018.8) |
| <b>Malta</b>          | 1297 (1213, 1381)          | 302.9 (283.4, 322.3)   | 1872 (1729, 2031)          | 322.7 (297.6, 350)    |
| <b>Netherlands</b>    | 74544 (69825, 79090)       | 419.1 (392.8, 444.9)   | 108160 (99647, 116893)     | 482.4 (444.7, 520.9)  |
| <b>Norway</b>         | 23184 (21857, 24546)       | 466.5 (440.1, 494.3)   | 35300 (33030, 37783)       | 529.5 (496.1, 566.3)  |
| <b>Portugal</b>       | 96550 (89356, 104009)      | 832.4 (769.8, 896.4)   | 66145 (60310, 72516)       | 452.4 (414.3, 496.1)  |
| <b>Spain</b>          | 389850 (353760, 424089)    | 864.4 (781.7, 942.9)   | 409390 (366627, 453230)    | 633.5 (567.4, 703.8)  |
| <b>Sweden</b>         | 47196 (43987, 50531)       | 442 (411.4, 475.8)     | 79724 (73632, 86446)       | 615.7 (567, 669)      |
| <b>Switzerland</b>    | 37349 (35085, 39627)       | 433.3 (406.4, 459.4)   | 51180 (47454, 55288)       | 440.7 (409, 474.5)    |
| <b>United Kingdom</b> | 261611 (246553, 278250)    | 385 (363.2, 409.3)     | 443403 (414844, 473635)    | 530.5 (497.1, 566.9)  |
| <b>Eastern Europe</b> | 1091230 (1020929, 1167220) | 416.3 (389.3, 446)     | 1793963 (1672667, 1928327) | 655 (609.8, 702.6)    |
| <b>Belarus</b>        | 48275 (43500, 53064)       | 404 (362.6, 444.8)     | 79466 (72163, 87417)       | 634.4 (575.5, 699.5)  |
| <b>Estonia</b>        | 6879 (6244, 7612)          | 376.5 (340.7, 416.8)   | 10764 (9823, 11858)        | 629.6 (569.7, 695.3)  |
| <b>Latvia</b>         | 11676 (10607, 12834)       | 364.7 (331.3, 403.1)   | 14249 (12998, 15686)       | 555.1 (501.6, 616.6)  |
| <b>Lithuania</b>      | 17951 (16391, 19720)       | 424.2 (385.6, 467.2)   | 26249 (24008, 28818)       | 710.2 (645.9, 782.3)  |
| <b>Moldova</b>        | 47248 (42982, 51705)       | 1019.7 (927.4, 1115.5) | 41947 (37986, 46219)       | 859.7 (777.1, 947.2)  |
| <b>Russia</b>         | 694567 (648566, 744136)    | 399.1 (372.3, 427.2)   | 1211199 (1127551, 1300413) | 638.3 (592.1, 684.4)  |
| <b>Ukraine</b>        | 264635 (247117, 282679)    | 425.5 (397.4, 455.2)   | 410089 (382340, 440706)    | 698.1 (649.6, 749.5)  |
| <b>Central Europe</b> | 1102807 (1035695, 1172986) | 783.6 (735.1, 834)     | 1267846 (1181162, 1364873) | 824.1 (765.3, 890.7)  |
| <b>Albania</b>        | 12927 (11815, 14192)       | 474.9 (435.2, 518.9)   | 20575 (18799, 22537)       | 611 (556.1, 671.3)    |

|                               |                         |                         |                            |                         |
|-------------------------------|-------------------------|-------------------------|----------------------------|-------------------------|
| <b>Bosnia and Herzegovina</b> | 27464 (25227, 29914)    | 565.1 (518.6, 614.3)    | 27067 (24601, 29689)       | 588.9 (534.4, 649.3)    |
| <b>Bulgaria</b>               | 73590 (68615, 79076)    | 672.5 (625.9, 725)      | 75035 (69366, 81287)       | 771.1 (710.4, 836.5)    |
| <b>Croatia</b>                | 56060 (51950, 60247)    | 935.6 (865.5, 1006.9)   | 44239 (41060, 47853)       | 757.7 (698.3, 821)      |
| <b>Czech Republic</b>         | 78887 (74156, 84439)    | 650.2 (609.4, 695.8)    | 102159 (94827, 109974)     | 704.5 (654.4, 762.5)    |
| <b>Hungary</b>                | 148119 (139088, 157664) | 1180.8 (1104.2, 1259.8) | 102121 (94528, 110412)     | 775.3 (716, 843.3)      |
| <b>Macedonia</b>              | 9389 (8611, 10197)      | 449 (412.8, 487.5)      | 15560 (14194, 17038)       | 548.2 (499, 601.6)      |
| <b>Montenegro</b>             | 2841 (2612, 3085)       | 431.3 (397.1, 468.5)    | 4490 (4103, 4890)          | 566.9 (516.4, 617.9)    |
| <b>Poland</b>                 | 288296 (268047, 308842) | 667.2 (621.3, 715.5)    | 447464 (413296, 485447)    | 870.9 (801.8, 946.4)    |
| <b>Romania</b>                | 272663 (255941, 290816) | 1038.5 (970.5, 1111.6)  | 272835 (252859, 293066)    | 1039.3 (959.6, 1116.8)  |
| <b>Serbia</b>                 | 43581 (40112, 47391)    | 393.3 (360.5, 429)      | 52042 (47957, 56655)       | 455.4 (417.6, 496.8)    |
| <b>Slovakia</b>               | 65009 (60407, 69884)    | 1135.8 (1055.6, 1220.2) | 82958 (76720, 89688)       | 1141.7 (1054.9, 1238.6) |
| <b>Slovenia</b>               | 23982 (22379, 25640)    | 1021.8 (953.1, 1095)    | 21300 (19629, 23058)       | 738.7 (681.7, 799.9)    |
| <b>Central Asia</b>           | 216006 (202353, 230832) | 380.6 (356.5, 405.4)    | 464824 (429064, 501955)    | 496.8 (459.3, 535.9)    |
| <b>Armenia</b>                | 8975 (8295, 9644)       | 275.9 (255.8, 296.2)    | 14023 (12950, 15218)       | 381.9 (352.3, 416)      |
| <b>Azerbaijan</b>             | 22659 (21020, 24338)    | 367.4 (341.3, 395.1)    | 48650 (44574, 53344)       | 418.9 (384.4, 457.6)    |
| <b>Georgia</b>                | 21842 (20339, 23477)    | 363.8 (337.9, 391.6)    | 18014 (16143, 19705)       | 399.6 (356.9, 439.1)    |
| <b>Kazakhstan</b>             | 48807 (45389, 52346)    | 314.4 (292.5, 336.1)    | 102604 (94361, 111313)     | 529.4 (487.9, 573.7)    |
| <b>Kyrgyzstan</b>             | 15409 (14306, 16585)    | 444.9 (413.3, 477.3)    | 30095 (27729, 32775)       | 504.7 (465.6, 546.7)    |
| <b>Mongolia</b>               | 6669 (6150, 7245)       | 469.2 (432.5, 509.9)    | 16876 (15414, 18401)       | 493.2 (452.7, 536.1)    |
| <b>Tajikistan</b>             | 13621 (12600, 14642)    | 381 (354.7, 408)        | 33534 (30575, 36550)       | 423.2 (388.5, 460.7)    |
| <b>Turkmenistan</b>           | 12028 (11175, 12989)    | 463.1 (429.9, 497.5)    | 30009 (27512, 32434)       | 583.4 (535, 630.1)      |
| <b>Uzbekistan</b>             | 65994 (61677, 71061)    | 449.8 (420.2, 482.7)    | 171019 (156666, 185744)    | 534.7 (492, 579.7)      |
| <b>Central Latin America</b>  | 872423 (819465, 924014) | 782.4 (738.5, 828)      | 2191522 (2049327, 2344069) | 865.3 (810.2, 925.4)    |
| <b>Colombia</b>               | 107606 (98806, 116975)  | 456.2 (420.4, 494.5)    | 319030 (293689, 348027)    | 598 (550.3, 652.4)      |
| <b>Costa Rica</b>             | 13419 (12328, 14506)    | 612.7 (564.1, 663.1)    | 41055 (37697, 44953)       | 802.2 (735.8, 879.1)    |

|                             |                         |                        |                            |                        |
|-----------------------------|-------------------------|------------------------|----------------------------|------------------------|
| <b>El Salvador</b>          | 22372 (20503, 24394)    | 632.7 (580.4, 689.2)   | 49753 (45331, 54650)       | 865.6 (788.2, 950.7)   |
| <b>Guatemala</b>            | 36470 (33508, 39369)    | 729.3 (670.8, 786.4)   | 115725 (106096, 125964)    | 892.6 (816.7, 971.4)   |
| <b>Honduras</b>             | 19706 (17948, 21515)    | 722.6 (660.1, 789.2)   | 64031 (58157, 70638)       | 890.6 (808, 981.8)     |
| <b>Mexico</b>               | 577358 (545531, 609107) | 1010.5 (957.4, 1067.4) | 1324926 (1246092, 1406978) | 1036.6 (976.4, 1099.6) |
| <b>Nicaragua</b>            | 12538 (11508, 13629)    | 588.2 (542.1, 639.1)   | 40661 (37053, 44616)       | 746.5 (681, 818.7)     |
| <b>Panama</b>               | 8306 (7609, 9012)       | 459.4 (421.7, 497.4)   | 25713 (23594, 28067)       | 636.9 (583.1, 694.9)   |
| <b>Venezuela</b>            | 74649 (69204, 80545)    | 565.5 (524.4, 607.6)   | 210628 (192640, 231432)    | 661.6 (605.8, 725.9)   |
| <b>Andean Latin America</b> | 97495 (88621, 106335)   | 371.6 (337.8, 406.6)   | 268367 (242260, 296021)    | 462.5 (417.2, 509.6)   |
| <b>Bolivia</b>              | 13858 (12422, 15294)    | 329.6 (295.5, 364.5)   | 45857 (40811, 51084)       | 460.4 (410.7, 512.6)   |
| <b>Ecuador</b>              | 19171 (17223, 21097)    | 278.5 (251.7, 306.4)   | 64221 (57280, 71529)       | 406.3 (362.1, 451.7)   |
| <b>Peru</b>                 | 64466 (58595, 70404)    | 425 (386, 465.7)       | 158289 (142954, 174856)    | 490.7 (443.6, 541.3)   |
| <b>Caribbean</b>            | 88095 (81995, 94280)    | 303 (282.2, 325)       | 185272 (170219, 201590)    | 368.5 (338.7, 401)     |
| <b>Antigua and Barbuda</b>  | 140 (129, 152)          | 275.1 (252.7, 299.2)   | 350 (320, 381)             | 324.9 (297.7, 352.9)   |
| <b>The Bahamas</b>          | 783 (727, 847)          | 382.2 (354.2, 412.3)   | 1630 (1490, 1770)          | 375.1 (343.2, 407.3)   |
| <b>Barbados</b>             | 626 (579, 677)          | 251.1 (232.5, 271.5)   | 1206 (1103, 1312)          | 303.5 (278.1, 330.6)   |
| <b>Belize</b>               | 344 (318, 370)          | 312.9 (289.6, 337.1)   | 1386 (1273, 1503)          | 407.4 (374.9, 441.6)   |
| <b>Bermuda</b>              | 218 (198, 240)          | 317.1 (287.7, 347.6)   | 314 (284, 345)             | 323.3 (293.5, 354.6)   |
| <b>Cuba</b>                 | 23413 (21592, 25331)    | 219.6 (202.3, 237.1)   | 52244 (47898, 57226)       | 330.2 (303, 361.4)     |
| <b>Dominica</b>             | 163 (152, 175)          | 267.9 (248.8, 288.1)   | 272 (250, 296)             | 338.3 (310.7, 367.8)   |
| <b>Dominican Republic</b>   | 19019 (17532, 20701)    | 391 (360.7, 425.1)     | 43327 (39223, 47492)       | 424 (384.7, 464.6)     |
| <b>Grenada</b>              | 215 (198, 231)          | 339.1 (312.8, 366.1)   | 429 (395, 466)             | 348.1 (320.9, 377.4)   |
| <b>Guyana</b>               | 2416 (2228, 2612)       | 452.3 (418.2, 487.1)   | 3198 (2932, 3481)          | 438.3 (402.1, 476.2)   |
| <b>Haiti</b>                | 12566 (11431, 13712)    | 289.8 (263.4, 316.3)   | 36782 (33225, 40598)       | 385.5 (347.5, 425.4)   |
| <b>Jamaica</b>              | 3574 (3316, 3849)       | 203 (188.2, 218.8)     | 8293 (7552, 9060)          | 282.1 (257.2, 308.4)   |
| <b>Puerto Rico</b>          | 16871 (15624, 18160)    | 467 (432.6, 502.7)     | 19523 (17932, 21085)       | 400.8 (368.3, 432.8)   |

|                                         |                            |                      |                            |                      |
|-----------------------------------------|----------------------------|----------------------|----------------------------|----------------------|
| <b>Saint Lucia</b>                      | 337 (311, 363)             | 357.3 (329.9, 385.4) | 754 (694, 818)             | 355 (327.3, 385.3)   |
| <b>Saint Vincent and the Grenadines</b> | 199 (184, 216)             | 265.8 (245.2, 287.7) | 416 (377, 456)             | 317.7 (288.7, 348.5) |
| <b>Suriname</b>                         | 1070 (991, 1160)           | 349.5 (323.5, 379.3) | 2606 (2399, 2842)          | 414 (381.3, 449.9)   |
| <b>Trinidad and Tobago</b>              | 2752 (2536, 2967)          | 275.7 (254.3, 297.6) | 5284 (4800, 5772)          | 305.4 (277.8, 333.8) |
| <b>Virgin Islands</b>                   | 374 (344, 407)             | 345.9 (318.6, 374.9) | 596 (543, 649)             | 418.3 (384.4, 455.1) |
| <b>Tropical Latin America</b>           | 256052 (240050, 273436)    | 211.2 (198.3, 225.7) | 491990 (458036, 529199)    | 198.2 (184.5, 213.1) |
| <b>Brazil</b>                           | 250719 (235176, 267795)    | 211.7 (199, 226)     | 477419 (444292, 513374)    | 197.2 (183.6, 212)   |
| <b>Paraguay</b>                         | 5333 (4779, 5913)          | 191.2 (171.7, 212.2) | 14571 (12916, 16335)       | 234.9 (208.6, 263.2) |
| <b>Southern Latin America</b>           | 223617 (211793, 237242)    | 471 (445.7, 500.1)   | 380028 (353544, 405839)    | 513.3 (477.7, 548)   |
| <b>Argentina</b>                        | 140026 (132182, 148686)    | 432.5 (408.1, 459.3) | 239065 (221078, 256451)    | 495.5 (458.7, 531.4) |
| <b>Chile</b>                            | 73552 (68924, 78381)       | 627.7 (588.3, 669.6) | 125963 (116955, 135031)    | 578.2 (537.3, 620)   |
| <b>Uruguay</b>                          | 10029 (9403, 10774)        | 297.9 (279.3, 319.6) | 14984 (13855, 16162)       | 371.1 (342.6, 399.9) |
| <b>East Asia</b>                        | 2916953 (2698743, 3147802) | 259.3 (240.1, 279.7) | 6291209 (5771875, 6864238) | 306.8 (282.6, 333.3) |
| <b>China</b>                            | 2757098 (2550813, 2982112) | 258.4 (239, 278.5)   | 5942774 (5455190, 6483091) | 304.7 (280.3, 330.7) |
| <b>North Korea</b>                      | 41602 (36896, 46878)       | 207 (183.5, 232.4)   | 103563 (90786, 117817)     | 319.2 (281.4, 360.7) |
| <b>Taiwan (Province of China)</b>       | 69655 (61546, 78350)       | 361.1 (320, 404.4)   | 143524 (127310, 161525)    | 417.2 (370.5, 469.4) |
| <b>Southeast Asia</b>                   | 199394 (178204, 223011)    | 57.6 (51.6, 64.4)    | 543840 (480431, 613912)    | 76.4 (67.6, 86)      |
| <b>Cambodia</b>                         | 4272 (3766, 4768)          | 68.6 (60.5, 76.3)    | 14925 (13109, 16948)       | 104.2 (91.5, 118)    |
| <b>Indonesia</b>                        | 81403 (73411, 90403)       | 58.2 (52.6, 64.5)    | 138839 (123934, 154455)    | 50.6 (45.4, 56.1)    |
| <b>Laos</b>                             | 1850 (1647, 2081)          | 67.9 (60.3, 76.4)    | 5536 (4840, 6246)          | 94.5 (82.5, 106.7)   |
| <b>Malaysia</b>                         | 5311 (4226, 6640)          | 40.8 (32.3, 50.6)    | 19519 (15636, 24348)       | 63.6 (51.2, 79.1)    |
| <b>Maldives</b>                         | 53 (47, 60)                | 41.8 (36.9, 46.8)    | 286 (250, 325)             | 61.8 (54.8, 69.6)    |
| <b>Mauritius</b>                        | 743 (663, 833)             | 77.9 (69.4, 87.2)    | 1210 (1075, 1358)          | 72.5 (64.6, 81.2)    |
| <b>Myanmar</b>                          | 20659 (18155, 23458)       | 69 (60.7, 78.5)      | 47667 (41594, 53719)       | 87 (76, 97.8)        |
| <b>Philippines</b>                      | 12641 (11260, 14070)       | 28.9 (25.8, 32)      | 49648 (43406, 56082)       | 53.2 (46.6, 59.8)    |

|                                       |                         |                      |                         |                      |
|---------------------------------------|-------------------------|----------------------|-------------------------|----------------------|
| <b>Sri Lanka</b>                      | 8235 (7326, 9237)       | 56.7 (50.4, 63.4)    | 18826 (16622, 21215)    | 74.8 (66.2, 84.3)    |
| <b>Seychelles</b>                     | 32 (28, 36)             | 55.9 (49.3, 63.1)    | 105 (92, 120)           | 84.2 (74.3, 95.4)    |
| <b>Thailand</b>                       | 28525 (22121, 36134)    | 58.3 (45.4, 73.4)    | 77741 (59894, 98691)    | 78.8 (61.3, 99.2)    |
| <b>East Timor</b>                     | 249 (219, 283)          | 49.4 (43.6, 55.9)    | 715 (633, 809)          | 79.5 (70.1, 90.1)    |
| <b>Vietnam</b>                        | 35154 (31296, 39219)    | 76.9 (68.2, 86.3)    | 168109 (148141, 189517) | 153.6 (135.7, 172.3) |
| <b>Oceania</b>                        | 4180 (3796, 4575)       | 91.8 (83.6, 100.2)   | 11840 (10644, 13078)    | 114.9 (103.7, 126.4) |
| <b>American Samoa</b>                 | 27 (25, 30)             | 78.9 (71.9, 87.3)    | 48 (43, 54)             | 91 (81.6, 101.9)     |
| <b>Federated States of Micronesia</b> | 65 (59, 73)             | 100.5 (90.5, 110.8)  | 106 (94, 118)           | 112.3 (100.6, 124.3) |
| <b>Fiji</b>                           | 340 (310, 373)          | 58.7 (53.7, 64.1)    | 815 (735, 904)          | 88.8 (80.2, 98.1)    |
| <b>Guam</b>                           | 141 (128, 153)          | 119 (108.1, 129.6)   | 230 (206, 254)          | 125.4 (112.9, 138.5) |
| <b>Kiribati</b>                       | 49 (45, 55)             | 91.2 (82.5, 100.4)   | 112 (101, 125)          | 113.8 (101.8, 126.8) |
| <b>Marshall Islands</b>               | 27 (24, 29)             | 104.3 (94.1, 114.9)  | 61 (54, 67)             | 121.1 (108.6, 134.2) |
| <b>Northern Mariana Islands</b>       | 44 (40, 49)             | 110.8 (100.3, 120.9) | 69 (61, 77)             | 115.4 (104.3, 127.1) |
| <b>Papua New Guinea</b>               | 2749 (2487, 3023)       | 96.2 (87.1, 105.5)   | 8630 (7765, 9572)       | 117.6 (106.1, 130.1) |
| <b>Samoa</b>                          | 101 (91, 111)           | 93.1 (84.5, 102.1)   | 184 (165, 206)          | 112.8 (100.9, 125.4) |
| <b>Solomon Islands</b>                | 187 (169, 206)          | 91.1 (82.5, 100.1)   | 554 (498, 613)          | 113.6 (102.4, 125.3) |
| <b>Tonga</b>                          | 64 (58, 71)             | 96.4 (87.5, 105.9)   | 110 (99, 122)           | 122.4 (110.1, 135.4) |
| <b>Vanuatu</b>                        | 110 (99, 121)           | 110.9 (99.7, 123)    | 269 (242, 300)          | 121.5 (108.8, 134.8) |
| <b>North Africa and Middle East</b>   | 134954 (120225, 150910) | 59.5 (53, 66.2)      | 342541 (303368, 384417) | 62.1 (55.4, 69.5)    |
| <b>Afghanistan</b>                    | 5055 (4506, 5625)       | 67.6 (60.5, 75)      | 14425 (12736, 16256)    | 79.3 (70.4, 88.7)    |
| <b>Algeria</b>                        | 9211 (8293, 10186)      | 58.8 (52.7, 64.9)    | 26970 (24026, 30222)    | 67.6 (60.4, 75.6)    |
| <b>Bahrain</b>                        | 283 (253, 318)          | 75.1 (67.5, 83.4)    | 1339 (1181, 1509)       | 71.9 (64.4, 80)      |
| <b>Egypt</b>                          | 38126 (32138, 44674)    | 96.6 (81.9, 112.3)   | 64374 (54512, 75781)    | 78.7 (66.8, 92.3)    |
| <b>Iran</b>                           | 11135 (10125, 12248)    | 30.8 (28, 33.8)      | 32421 (29320, 35653)    | 36.9 (33.4, 40.5)    |
| <b>Iraq</b>                           | 5478 (4897, 6059)       | 53 (47.6, 58.5)      | 16674 (14810, 18555)    | 51.8 (46.4, 57.3)    |



|                                    |                            |                      |                            |                      |
|------------------------------------|----------------------------|----------------------|----------------------------|----------------------|
| <b>Jordan</b>                      | 1295 (1164, 1435)          | 61.5 (55.5, 68.3)    | 6379 (5626, 7079)          | 73.3 (65, 81.2)      |
| <b>Kuwait</b>                      | 597 (535, 669)             | 44.2 (39.9, 48.8)    | 2559 (2268, 2887)          | 53.9 (48.2, 60.1)    |
| <b>Lebanon</b>                     | 1721 (1548, 1901)          | 61.2 (55.4, 67.5)    | 5151 (4581, 5722)          | 69.8 (62.3, 77.5)    |
| <b>Libya</b>                       | 1528 (1375, 1679)          | 59.9 (54, 66)        | 4641 (4123, 5216)          | 69.2 (61.8, 77.1)    |
| <b>Morocco</b>                     | 10055 (9014, 11125)        | 56.6 (50.9, 62.7)    | 23738 (21113, 26602)       | 65.4 (58.5, 73.3)    |
| <b>Palestine</b>                   | 594 (534, 659)             | 54.1 (48.8, 59.7)    | 2205 (1952, 2462)          | 63.6 (56.8, 70.6)    |
| <b>Oman</b>                        | 759 (679, 844)             | 62.1 (56, 69.1)      | 3066 (2694, 3437)          | 71.3 (63.8, 79.1)    |
| <b>Qatar</b>                       | 265 (234, 298)             | 71.4 (63.8, 79.7)    | 2270 (1978, 2556)          | 76.7 (68.1, 85.8)    |
| <b>Saudi Arabia</b>                | 6284 (5344, 7331)          | 63 (54.2, 72.9)      | 22906 (19347, 27027)       | 65.8 (56.4, 76.5)    |
| <b>Sudan</b>                       | 9124 (8171, 10200)         | 75 (67.2, 83.7)      | 22001 (19453, 24683)       | 84.7 (75.3, 95)      |
| <b>Syria</b>                       | 3902 (3492, 4297)          | 54.6 (49, 60.2)      | 10542 (9440, 11730)        | 65.6 (58.8, 72.7)    |
| <b>Tunisia</b>                     | 5519 (4613, 6582)          | 88.7 (74, 104.9)     | 13784 (11513, 16363)       | 105.3 (88.4, 124.3)  |
| <b>Turkey</b>                      | 17869 (15547, 20378)       | 40.3 (35.1, 46)      | 41426 (36027, 47418)       | 45.5 (39.7, 52)      |
| <b>United Arab Emirates</b>        | 1144 (988, 1315)           | 78.5 (69.5, 88.1)    | 10966 (9442, 12590)        | 83.1 (73.5, 93.6)    |
| <b>Yemen</b>                       | 4924 (4404, 5463)          | 69.4 (62.2, 77.4)    | 14385 (12739, 16101)       | 75.1 (66.6, 83.8)    |
| <b>South Asia</b>                  | 1135950 (1039268, 1237831) | 133.8 (123.2, 145.9) | 2527215 (2291839, 2783916) | 151.6 (137.6, 166.5) |
| <b>Bangladesh</b>                  | 102137 (93229, 111875)     | 144.7 (132.5, 158)   | 197785 (179958, 216598)    | 134 (121.7, 146.6)   |
| <b>Bhutan</b>                      | 637 (579, 699)             | 171.3 (155.9, 187.3) | 1404 (1269, 1554)          | 156.6 (141.4, 172.3) |
| <b>India</b>                       | 967413 (884947, 1053479)   | 140 (128.8, 152.3)   | 2188017 (1987144, 2404428) | 164.8 (149.8, 180.5) |
| <b>Nepal</b>                       | 32899 (29287, 37189)       | 238.2 (212.6, 267.8) | 63726 (55955, 72234)       | 244.7 (215.1, 276.5) |
| <b>Pakistan</b>                    | 32864 (26348, 40581)       | 45.6 (36.6, 56.3)    | 76283 (61508, 94029)       | 45.9 (37.3, 56.3)    |
| <b>Southern sub-Saharan Africa</b> | 84448 (77863, 91869)       | 228 (210.8, 247.2)   | 126137 (115529, 138080)    | 179.1 (164.5, 195.7) |
| <b>Botswana</b>                    | 1447 (1301, 1602)          | 180.4 (162.7, 199.1) | 3966 (3552, 4438)          | 194.4 (175.6, 216.3) |
| <b>Lesotho</b>                     | 2345 (2099, 2624)          | 191.7 (171.5, 214.2) | 3212 (2861, 3608)          | 201.1 (180.2, 226)   |
| <b>Namibia</b>                     | 1294 (1143, 1456)          | 142.8 (126.2, 160.2) | 3660 (3289, 4070)          | 196 (177, 217)       |

|                                   |                         |                      |                         |                      |
|-----------------------------------|-------------------------|----------------------|-------------------------|----------------------|
| <b>South Africa</b>               | 64215 (59523, 69343)    | 231.1 (214.4, 249.7) | 90513 (83447, 98349)    | 168.4 (155.6, 182.6) |
| <b>Swaziland</b>                  | 958 (864, 1065)         | 211.4 (190.2, 234.3) | 1592 (1423, 1772)       | 192.2 (172.7, 213.4) |
| <b>Zimbabwe</b>                   | 14189 (12715, 15762)    | 241.6 (217, 267.7)   | 23195 (20630, 26057)    | 224.7 (200.7, 250.9) |
| <b>Western sub-Saharan Africa</b> | 372537 (338657, 409873) | 306.7 (278.6, 337.2) | 811691 (729513, 903406) | 292.8 (264.3, 325.1) |
| <b>Benin</b>                      | 6984 (6278, 7781)       | 256.8 (231.1, 284.3) | 18973 (16943, 21170)    | 265 (237.9, 294.2)   |
| <b>Burkina Faso</b>               | 16937 (15410, 18535)    | 299.2 (272.5, 327)   | 44059 (39441, 49415)    | 334 (298.5, 372.9)   |
| <b>Cameroon</b>                   | 17269 (15688, 19102)    | 269.9 (244.3, 297.9) | 49550 (44361, 55372)    | 275.8 (247.5, 307.2) |
| <b>Cape Verde</b>                 | 419 (381, 462)          | 195.1 (177.1, 214.6) | 1252 (1124, 1396)       | 247 (222.4, 274.4)   |
| <b>Chad</b>                       | 8570 (7779, 9425)       | 241 (218.2, 264.5)   | 21271 (19042, 23562)    | 261.2 (234.4, 288.8) |
| <b>Côte d'Ivoire</b>              | 18404 (16631, 20404)    | 256.3 (233, 282.6)   | 46850 (42147, 52167)    | 268.5 (243, 298.1)   |
| <b>The Gambia</b>                 | 1338 (1211, 1493)       | 239.2 (216.5, 264.4) | 3657 (3278, 4068)       | 268.6 (242.7, 297.5) |
| <b>Ghana</b>                      | 23548 (21269, 25982)    | 246.8 (223.8, 271.5) | 61216 (54833, 68179)    | 266.6 (239.4, 295.4) |
| <b>Guinea</b>                     | 9573 (8619, 10654)      | 235.5 (212.4, 261.2) | 18182 (16273, 20380)    | 246.6 (220.9, 275.6) |
| <b>Guinea-Bissau</b>              | 1563 (1422, 1721)       | 266.6 (242.8, 291.9) | 2998 (2690, 3350)       | 255.3 (229.6, 282.9) |
| <b>Liberia</b>                    | 4201 (3792, 4677)       | 312.2 (283.4, 344.3) | 9143 (8184, 10141)      | 280.1 (252.1, 308.7) |
| <b>Mali</b>                       | 13579 (12282, 15033)    | 248.1 (224.3, 273.2) | 30203 (27122, 33754)    | 257.7 (231.6, 287.9) |
| <b>Mauritania</b>                 | 2559 (2316, 2819)       | 195.9 (177.9, 215.7) | 5290 (4755, 5906)       | 199.4 (178.9, 221.4) |
| <b>Niger</b>                      | 10769 (9682, 12039)     | 240.6 (216.2, 266.6) | 30294 (26939, 34185)    | 271 (242.4, 303.8)   |
| <b>Nigeria</b>                    | 215330 (194010, 237128) | 362.2 (325.6, 399.4) | 418252 (372267, 468130) | 321 (288.6, 357.5)   |
| <b>São Tomé and Príncipe</b>      | 248 (225, 273)          | 341.2 (308.5, 375.9) | 548 (490, 617)          | 363.4 (326, 405.9)   |
| <b>Senegal</b>                    | 7905 (7199, 8753)       | 178.5 (162.6, 197.3) | 21023 (18893, 23561)    | 211.7 (190.3, 236.3) |
| <b>Sierra Leone</b>               | 8379 (7563, 9238)       | 336.2 (304.4, 369.6) | 16303 (14570, 18224)    | 315.8 (284.4, 350.9) |
| <b>Togo</b>                       | 4952 (4482, 5443)       | 244 (222.6, 268.5)   | 12619 (11228, 14165)    | 230 (205.9, 256.4)   |
| <b>Eastern sub-Saharan Africa</b> | 320054 (289232, 352996) | 288 (260.8, 318.4)   | 709379 (636528, 792397) | 289.2 (261.5, 320.7) |
| <b>Burundi</b>                    | 12411 (10991, 13938)    | 377.5 (334.8, 420.8) | 24090 (21326, 27180)    | 354.2 (314.7, 398.2) |

|                                   |                      |                      |                         |                      |
|-----------------------------------|----------------------|----------------------|-------------------------|----------------------|
| <b>Comoros</b>                    | 604 (540, 671)       | 217 (194·3, 241)     | 1462 (1304, 1644)       | 246·7 (220·9, 276·2) |
| <b>Djibouti</b>                   | 690 (616, 770)       | 241·8 (217·1, 268·6) | 2556 (2264, 2884)       | 270·2 (242·1, 302·9) |
| <b>Eritrea</b>                    | 4505 (4023, 5057)    | 272·7 (244·8, 304·8) | 11568 (10235, 12941)    | 289·9 (259, 322·5)   |
| <b>Ethiopia</b>                   | 70586 (63843, 78144) | 234·1 (211·6, 259·3) | 142186 (127795, 157745) | 228·2 (206·1, 252·1) |
| <b>Kenya</b>                      | 44390 (40002, 49504) | 356·6 (321·6, 395·5) | 110323 (98438, 123730)  | 331 (298·1, 369·9)   |
| <b>Madagascar</b>                 | 18914 (16959, 21021) | 262·7 (236·8, 290·4) | 45071 (39820, 50684)    | 265·5 (235·9, 296·9) |
| <b>Malawi</b>                     | 16917 (15166, 18823) | 295·4 (264·2, 326·9) | 31846 (28426, 35558)    | 297·6 (265·9, 333)   |
| <b>Mozambique</b>                 | 21470 (19073, 24044) | 240·4 (214·7, 268·5) | 53490 (47329, 60048)    | 305·3 (272·3, 342·5) |
| <b>Rwanda</b>                     | 19300 (16939, 22023) | 449·6 (395·2, 511·6) | 31322 (27364, 36142)    | 357·5 (313·4, 410·3) |
| <b>Somalia</b>                    | 11366 (9985, 12865)  | 252·5 (225, 283·8)   | 28770 (25389, 32695)    | 281·2 (250·3, 317·1) |
| <b>South Sudan</b>                | 9711 (8614, 10883)   | 275·3 (245·8, 308·1) | 17789 (15630, 20075)    | 291·2 (257·9, 327)   |
| <b>Tanzania</b>                   | 43024 (38817, 47788) | 286 (258·1, 316·6)   | 102676 (91887, 114586)  | 295·6 (265·5, 329·1) |
| <b>Uganda</b>                     | 31810 (28611, 35159) | 339·5 (305·2, 374·2) | 74756 (67138, 83391)    | 346·9 (312·7, 386·1) |
| <b>Zambia</b>                     | 14194 (12693, 15764) | 327·3 (293·7, 362·5) | 31030 (27757, 34666)    | 290·6 (260·3, 322·7) |
| <b>Central sub-Saharan Africa</b> | 72399 (65040, 80698) | 213·5 (192·3, 236·8) | 190034 (168739, 213483) | 234·8 (209·6, 262·1) |
| <b>Angola</b>                     | 14141 (12671, 15818) | 221·9 (199·5, 248·7) | 43431 (38475, 48882)    | 247·2 (220·6, 276·6) |
| <b>Central African Republic</b>   | 3629 (3240, 4057)    | 205·6 (184, 229)     | 7276 (6399, 8233)       | 214·9 (190·2, 242·4) |
| <b>Congo</b>                      | 3354 (3018, 3734)    | 223 (200·6, 248·5)   | 8693 (7682, 9778)       | 217·8 (193·7, 243·8) |
| <b>DR Congo</b>                   | 48928 (43738, 54514) | 209·8 (188, 232·9)   | 125575 (111219, 141312) | 233·6 (207·4, 261·4) |
| <b>Equatorial Guinea</b>          | 535 (480, 598)       | 198·6 (178·3, 221·9) | 1848 (1625, 2081)       | 227 (201·2, 254·9)   |
| <b>Gabon</b>                      | 1811 (1621, 2029)    | 268·5 (240, 300·2)   | 3211 (2854, 3608)       | 226·1 (201·6, 253·4) |

**Appendix Table 24: Number of prevalent cases and age-standardised prevalence rates of compensated cirrhosis due to non-alcoholic steatohepatitis (NASH) per 100 000 in 1990 and 2017 for both sexes by location**

|                                  | 1990                       |                      | 2017                        |                      |
|----------------------------------|----------------------------|----------------------|-----------------------------|----------------------|
|                                  | Counts (95% UI)            | Rate (95% UI)        | Counts (95% UI)             | Rate (95% UI)        |
| <b>Global</b>                    | 4060384 (3697171, 4446518) | 86.7 (79, 94.6)      | 9424419 (8570840, 10335527) | 115.5 (105, 126.5)   |
| <b>High-income North America</b> | 101741 (94321, 109605)     | 31.5 (29.2, 34)      | 191460 (175784, 207365)     | 37.5 (34.4, 40.6)    |
| <b>Canada</b>                    | 7908 (7050, 8841)          | 24.8 (22.1, 27.8)    | 15338 (13270, 17652)        | 28.4 (24.6, 32.5)    |
| <b>Greenland</b>                 | 11 (9, 12)                 | 21.1 (18.3, 23.9)    | 18 (15, 21)                 | 24.9 (21.1, 28.7)    |
| <b>USA</b>                       | 93820 (87008, 100906)      | 32.3 (29.9, 34.8)    | 176101 (161684, 190239)     | 38.6 (35.4, 41.7)    |
| <b>Australasia</b>               | 11804 (10503, 13221)       | 52.9 (47.1, 59.3)    | 23869 (21198, 26716)        | 66.5 (58.9, 74.3)    |
| <b>Australia</b>                 | 9631 (8453, 10906)         | 51.6 (45.1, 58.6)    | 19811 (17504, 22388)        | 65.4 (57.5, 73.8)    |
| <b>New Zealand</b>               | 2173 (2006, 2357)          | 59.4 (54.8, 64.4)    | 4058 (3712, 4425)           | 72.6 (66.5, 79)      |
| <b>High-income Asia-Pacific</b>  | 216093 (186309, 249877)    | 105.9 (91.4, 122.3)  | 244744 (210036, 283125)     | 91.2 (78, 105.3)     |
| <b>Brunei</b>                    | 120 (104, 139)             | 61.3 (54.2, 69.6)    | 409 (352, 477)              | 88.9 (77, 102.9)     |
| <b>Japan</b>                     | 132654 (117500, 148635)    | 83.1 (73.8, 93)      | 140447 (126629, 154911)     | 75 (67, 83)          |
| <b>Singapore</b>                 | 867 (675, 1095)            | 26.8 (21.3, 33.2)    | 2530 (1991, 3167)           | 35.5 (28.1, 44.2)    |
| <b>South Korea</b>               | 82452 (63669, 104881)      | 197.4 (153.2, 249.3) | 101358 (77990, 127772)      | 133.6 (103.7, 168.3) |
| <b>Western Europe</b>            | 436291 (379934, 503177)    | 94.2 (81.4, 108.8)   | 691199 (609830, 778069)     | 119.1 (104.5, 135.1) |
| <b>Andorra</b>                   | 50 (43, 58)                | 78.5 (67.5, 90.3)    | 131 (112, 152)              | 111.5 (95.9, 129)    |
| <b>Austria</b>                   | 12722 (11035, 14662)       | 136.9 (117.8, 157.9) | 19053 (16655, 21678)        | 158.5 (137.2, 181.6) |
| <b>Belgium</b>                   | 6114 (4584, 8096)          | 50 (37.2, 66.6)      | 10381 (7811, 13360)         | 69.9 (51.8, 92.3)    |
| <b>Cyprus</b>                    | 512 (443, 587)             | 62.6 (54, 71.8)      | 1321 (1151, 1497)           | 80.7 (70.2, 91.6)    |
| <b>Denmark</b>                   | 4063 (3511, 4621)          | 64.5 (55.8, 73.8)    | 8784 (7688, 9929)           | 118.3 (102.6, 134.4) |
| <b>Finland</b>                   | 4469 (3853, 5057)          | 72 (62.1, 81.7)      | 10399 (9191, 11763)         | 145.1 (127, 165.2)   |
| <b>France</b>                    | 63397 (53918, 72644)       | 94.7 (80, 108.8)     | 87135 (76065, 98386)        | 104.2 (90, 118.6)    |

|                       |                         |                      |                         |                      |
|-----------------------|-------------------------|----------------------|-------------------------|----------------------|
| <b>Germany</b>        | 101910 (88668, 115186)  | 100.8 (86.9, 114.3)  | 176045 (154927, 199675) | 152.8 (132.3, 174.3) |
| <b>Greece</b>         | 11559 (10129, 13021)    | 91.5 (79.6, 103.9)   | 15647 (13710, 17727)    | 108.1 (94.6, 123)    |
| <b>Iceland</b>        | 261 (219, 308)          | 99.5 (83.5, 117.9)   | 822 (691, 962)          | 202.1 (169, 238)     |
| <b>Ireland</b>        | 1956 (1715, 2222)       | 53.8 (47, 61.5)      | 6268 (5429, 7127)       | 103.9 (89.8, 118.2)  |
| <b>Israel</b>         | 4217 (3685, 4802)       | 91 (79.5, 103.8)     | 12414 (10906, 14024)    | 132.2 (115.8, 149.6) |
| <b>Italy</b>          | 80057 (62209, 118131)   | 113 (86.9, 167.5)    | 93241 (76780, 110762)   | 105.6 (86.7, 126.2)  |
| <b>Luxembourg</b>     | 661 (575, 749)          | 136.8 (118.4, 155.2) | 1341 (1158, 1539)       | 169.9 (147.2, 195.3) |
| <b>Malta</b>          | 264 (228, 300)          | 61.8 (53.6, 70.2)    | 489 (425, 554)          | 83.7 (72.4, 95.3)    |
| <b>Netherlands</b>    | 13159 (11560, 14919)    | 73.9 (64.8, 83.9)    | 24322 (21286, 27458)    | 107.3 (93.1, 122.2)  |
| <b>Norway</b>         | 4245 (3904, 4615)       | 84.9 (77.9, 92.3)    | 7725 (7067, 8342)       | 115 (104.7, 124.4)   |
| <b>Portugal</b>       | 13490 (11657, 15551)    | 116.3 (99.4, 134.6)  | 13946 (12038, 15922)    | 94.5 (81.6, 108.8)   |
| <b>Spain</b>          | 51243 (44093, 59727)    | 114.2 (97.2, 133.8)  | 72269 (61832, 84286)    | 112.7 (95.6, 131.2)  |
| <b>Sweden</b>         | 9008 (8108, 9924)       | 84.5 (75.9, 93.6)    | 19593 (17657, 21637)    | 152.2 (137.1, 169.1) |
| <b>Switzerland</b>    | 5286 (4599, 5997)       | 61.2 (53, 69.5)      | 9645 (8393, 10957)      | 82.3 (71.5, 93.2)    |
| <b>United Kingdom</b> | 47228 (43154, 51418)    | 69.1 (62.8, 75.4)    | 99511 (90676, 108182)   | 117.8 (106.6, 128.9) |
| <b>Eastern Europe</b> | 287402 (268311, 308469) | 111.4 (104, 119.3)   | 522272 (486363, 563067) | 194.8 (181.7, 209.5) |
| <b>Belarus</b>        | 10719 (9624, 11860)     | 90.7 (81.5, 100.9)   | 19932 (17795, 22056)    | 162 (144.4, 179.2)   |
| <b>Estonia</b>        | 1646 (1482, 1827)       | 91.4 (82, 101.5)     | 2558 (2289, 2839)       | 150.8 (134.3, 167.8) |
| <b>Latvia</b>         | 2856 (2563, 3172)       | 90.6 (81.2, 100.3)   | 3822 (3432, 4223)       | 150.2 (134.6, 166.7) |
| <b>Lithuania</b>      | 4166 (3742, 4620)       | 99.4 (89.5, 110.2)   | 6510 (5833, 7220)       | 177.3 (158.1, 197.1) |
| <b>Moldova</b>        | 12003 (10783, 13268)    | 260.1 (233, 288.1)   | 12842 (11511, 14294)    | 265.9 (238.4, 296.4) |
| <b>Russia</b>         | 187810 (175314, 202066) | 109.7 (102.4, 117.9) | 361428 (336313, 389565) | 194.7 (181.2, 209.7) |
| <b>Ukraine</b>        | 68204 (63452, 73343)    | 111.7 (103.9, 120.6) | 115181 (106997, 124408) | 200.3 (185.6, 215.9) |
| <b>Central Europe</b> | 168686 (153737, 184677) | 121.1 (110.1, 133.2) | 228182 (206614, 249517) | 151.4 (137, 166.6)   |
| <b>Albania</b>        | 2678 (2389, 2995)       | 96.4 (86.6, 107.6)   | 4601 (4106, 5105)       | 138.4 (123, 154.6)   |

|                               |                         |                      |                         |                      |
|-------------------------------|-------------------------|----------------------|-------------------------|----------------------|
| <b>Bosnia and Herzegovina</b> | 5336 (4782, 5940)       | 110.4 (99, 122.8)    | 6700 (5974, 7448)       | 149 (133.2, 165.8)   |
| <b>Bulgaria</b>               | 11784 (10693, 13063)    | 109.7 (99.5, 121.8)  | 13026 (11742, 14368)    | 137 (123.4, 152)     |
| <b>Croatia</b>                | 8701 (7851, 9581)       | 147.2 (132.4, 162.9) | 8250 (7485, 9051)       | 144.1 (130.5, 159.4) |
| <b>Czech Republic</b>         | 11729 (10653, 12964)    | 97.8 (88.7, 108.2)   | 16925 (15265, 18613)    | 119.4 (108, 132.1)   |
| <b>Hungary</b>                | 22667 (20269, 25247)    | 182.3 (162.3, 203.3) | 18457 (16680, 20358)    | 143 (129, 158.5)     |
| <b>Macedonia</b>              | 1890 (1706, 2098)       | 90.7 (81.9, 100.7)   | 3835 (3433, 4247)       | 138.1 (124.2, 153.4) |
| <b>Montenegro</b>             | 539 (486, 595)          | 82.2 (74.2, 90.9)    | 892 (795, 993)          | 114.8 (102, 127.7)   |
| <b>Poland</b>                 | 42987 (38884, 47417)    | 100.7 (90.6, 111.2)  | 76933 (69116, 85114)    | 153.2 (137.3, 170.2) |
| <b>Romania</b>                | 39107 (35462, 42805)    | 149.9 (135.5, 164.7) | 49646 (44619, 54763)    | 192.2 (172.6, 212.8) |
| <b>Serbia</b>                 | 8080 (7247, 8922)       | 73.9 (66.3, 81.7)    | 10506 (9409, 11601)     | 93.7 (83.9, 103.9)   |
| <b>Slovakia</b>               | 9597 (8684, 10619)      | 169 (152.7, 186.5)   | 14093 (12695, 15594)    | 198.4 (178.3, 220.1) |
| <b>Slovenia</b>               | 3593 (3265, 3948)       | 154.7 (140.2, 170)   | 4318 (3878, 4758)       | 152.8 (137.1, 168.6) |
| <b>Central Asia</b>           | 45065 (40927, 49694)    | 78.3 (71, 86.6)      | 111887 (99488, 124947)  | 120.5 (107.4, 134.4) |
| <b>Armenia</b>                | 1964 (1775, 2173)       | 60.4 (54.6, 66.8)    | 3616 (3238, 4012)       | 99.7 (89.3, 110.7)   |
| <b>Azerbaijan</b>             | 4900 (4396, 5397)       | 78.7 (70.6, 86.7)    | 13020 (11472, 14603)    | 113.6 (100.6, 126.8) |
| <b>Georgia</b>                | 4485 (4053, 4976)       | 75 (67.8, 83.2)      | 4334 (3774, 4852)       | 96.9 (83.8, 108.5)   |
| <b>Kazakhstan</b>             | 9820 (8815, 10959)      | 63.1 (56.6, 70.2)    | 22548 (20085, 25063)    | 117.6 (104.9, 130.4) |
| <b>Kyrgyzstan</b>             | 3181 (2863, 3531)       | 90.4 (81.1, 100.6)   | 7107 (6230, 7987)       | 119.6 (105.1, 134.1) |
| <b>Mongolia</b>               | 1407 (1259, 1561)       | 96 (85.9, 106.9)     | 3736 (3267, 4248)       | 110.9 (97.8, 125.2)  |
| <b>Tajikistan</b>             | 2702 (2428, 2990)       | 72.7 (64.6, 80.4)    | 7588 (6675, 8594)       | 95.2 (84, 107.3)     |
| <b>Turkmenistan</b>           | 2514 (2277, 2774)       | 94.5 (85.2, 104.2)   | 7472 (6633, 8351)       | 146.7 (130.5, 163.4) |
| <b>Uzbekistan</b>             | 14092 (12783, 15620)    | 93.5 (84.7, 103.4)   | 42466 (37609, 47425)    | 133.5 (118.8, 149.3) |
| <b>Central Latin America</b>  | 263944 (238106, 291706) | 238 (215.3, 261.7)   | 818825 (738767, 903568) | 324.8 (293.6, 357.6) |
| <b>Colombia</b>               | 25941 (22593, 29536)    | 111.2 (97.1, 126.2)  | 97694 (85639, 111402)   | 182.8 (160.3, 208.6) |
| <b>Costa Rica</b>             | 3472 (3027, 3949)       | 160.2 (140, 182)     | 13639 (11969, 15539)    | 267.3 (234.8, 304.4) |

|                             |                         |                      |                         |                      |
|-----------------------------|-------------------------|----------------------|-------------------------|----------------------|
| <b>El Salvador</b>          | 6982 (6122, 7915)       | 197.7 (173, 224.9)   | 19582 (17266, 22144)    | 340.8 (300.1, 385.5) |
| <b>Guatemala</b>            | 11865 (10305, 13567)    | 238.7 (209, 274)     | 47412 (41396, 54013)    | 370.8 (324.9, 420.9) |
| <b>Honduras</b>             | 6801 (5910, 7769)       | 250.5 (218.3, 286.5) | 26844 (23292, 30623)    | 377.5 (328.4, 430)   |
| <b>Mexico</b>               | 180526 (164105, 198565) | 317.2 (289.5, 347.5) | 504560 (459772, 551168) | 396.9 (362.4, 432.7) |
| <b>Nicaragua</b>            | 4176 (3652, 4704)       | 197.1 (173.2, 221.8) | 18124 (15863, 20540)    | 337.4 (296.3, 381)   |
| <b>Panama</b>               | 2256 (1965, 2602)       | 125.6 (109.4, 144.7) | 7944 (6782, 9154)       | 196.9 (168.7, 226.5) |
| <b>Venezuela</b>            | 21924 (19255, 24995)    | 168.2 (148.2, 189.9) | 83025 (72961, 93782)    | 263.6 (232.5, 297.1) |
| <b>Andean Latin America</b> | 43643 (39212, 48548)    | 165.5 (148.6, 184.5) | 162687 (146358, 181356) | 281.1 (252.7, 312.6) |
| <b>Bolivia</b>              | 6780 (6027, 7572)       | 161.2 (143.2, 179.9) | 29191 (25939, 32890)    | 294.2 (262.1, 331.2) |
| <b>Ecuador</b>              | 12885 (11576, 14350)    | 186.3 (167.2, 207.4) | 52093 (46480, 58069)    | 330.2 (294.8, 366.8) |
| <b>Peru</b>                 | 23978 (21346, 26645)    | 157.3 (140.3, 175.8) | 81403 (72695, 91048)    | 253 (226, 282)       |
| <b>Caribbean</b>            | 42674 (38592, 47131)    | 147.8 (133.7, 163.2) | 105841 (94526, 117380)  | 209.7 (187.3, 232.7) |
| <b>Antigua and Barbuda</b>  | 80 (72, 88)             | 156.7 (141.6, 173.2) | 239 (214, 264)          | 222.4 (200.3, 245.3) |
| <b>The Bahamas</b>          | 330 (294, 365)          | 164.3 (147.5, 181.7) | 890 (794, 994)          | 207 (185.3, 230.1)   |
| <b>Barbados</b>             | 360 (324, 397)          | 143 (128.2, 158.6)   | 832 (747, 922)          | 205.6 (184.5, 227.4) |
| <b>Belize</b>               | 173 (156, 190)          | 157.6 (141.8, 174)   | 846 (760, 938)          | 252.2 (226.3, 278.4) |
| <b>Bermuda</b>              | 101 (89, 113)           | 148.6 (130.8, 166.1) | 208 (185, 232)          | 210 (186.6, 234.3)   |
| <b>Cuba</b>                 | 12968 (11740, 14304)    | 122 (110.1, 134.6)   | 33122 (29526, 36601)    | 205.4 (183.7, 226.9) |
| <b>Dominica</b>             | 77 (70, 85)             | 124.9 (112.1, 138.3) | 159 (142, 176)          | 195.2 (174.5, 215.7) |
| <b>Dominican Republic</b>   | 8293 (7437, 9217)       | 172.5 (155.1, 191.9) | 21742 (19182, 24406)    | 214.6 (189.6, 240.7) |
| <b>Grenada</b>              | 93 (84, 102)            | 144.9 (129.9, 160.4) | 249 (224, 275)          | 198 (177.5, 219.5)   |
| <b>Guyana</b>               | 1002 (895, 1116)        | 191 (171.1, 212.9)   | 1815 (1621, 2019)       | 250.8 (224.7, 277.7) |
| <b>Haiti</b>                | 5067 (4384, 5856)       | 118.4 (102.5, 136.3) | 16886 (14321, 19603)    | 181.4 (154.3, 209.1) |
| <b>Jamaica</b>              | 1935 (1753, 2129)       | 108.9 (98.6, 120.1)  | 5435 (4887, 6036)       | 184.8 (166.4, 205.5) |
| <b>Puerto Rico</b>          | 8284 (7451, 9150)       | 229.1 (206, 252.8)   | 13174 (11924, 14548)    | 261.1 (235.1, 289.3) |

|                                         |                            |                      |                            |                      |
|-----------------------------------------|----------------------------|----------------------|----------------------------|----------------------|
| <b>Saint Lucia</b>                      | 159 (143, 176)             | 169.2 (151.1, 187.1) | 479 (426, 535)             | 225.4 (201.4, 250.9) |
| <b>Saint Vincent and the Grenadines</b> | 108 (97, 119)              | 143.8 (128.7, 159.4) | 331 (287, 376)             | 252.2 (218.1, 286.1) |
| <b>Suriname</b>                         | 504 (451, 558)             | 165.6 (148.6, 183.6) | 1490 (1331, 1659)          | 237.6 (212.5, 263.5) |
| <b>Trinidad and Tobago</b>              | 1491 (1340, 1661)          | 151.3 (136, 167.4)   | 3767 (3375, 4179)          | 217.5 (195.1, 241.3) |
| <b>Virgin Islands</b>                   | 189 (167, 211)             | 177.9 (158.5, 197.5) | 370 (330, 411)             | 253.2 (225.8, 282.1) |
| <b>Tropical Latin America</b>           | 198969 (182280, 215191)    | 166.8 (153.7, 180.1) | 492530 (449825, 536995)    | 199.7 (182.6, 217.6) |
| <b>Brazil</b>                           | 195694 (179542, 211780)    | 167.9 (154.8, 181.3) | 481200 (439973, 524471)    | 200.1 (183.1, 217.7) |
| <b>Paraguay</b>                         | 3275 (2831, 3760)          | 118.6 (103.3, 135.7) | 11330 (9816, 12921)        | 184.7 (160.1, 210.1) |
| <b>Southern Latin America</b>           | 44940 (40751, 49409)       | 94.6 (85.8, 104)     | 104162 (94050, 115488)     | 140.4 (126.9, 155.7) |
| <b>Argentina</b>                        | 25522 (23080, 28099)       | 78.7 (71, 86.8)      | 60612 (54289, 67686)       | 125.4 (112.3, 140.3) |
| <b>Chile</b>                            | 16786 (15114, 18596)       | 143.6 (129.6, 158.7) | 38278 (34650, 42200)       | 175.6 (158.4, 193.2) |
| <b>Uruguay</b>                          | 2631 (2397, 2887)          | 77.8 (70.4, 85.5)    | 5268 (4714, 5814)          | 129.2 (115.5, 143.2) |
| <b>East Asia</b>                        | 1108634 (1017388, 1198686) | 97.5 (89.5, 105.6)   | 2702425 (2472340, 2941968) | 135.1 (123.8, 146.8) |
| <b>China</b>                            | 1050721 (964184, 1136109)  | 97.4 (89.5, 105.4)   | 2557163 (2338289, 2783312) | 134.4 (123.3, 145.9) |
| <b>North Korea</b>                      | 13728 (11788, 15663)       | 68.8 (59.5, 78)      | 37009 (31867, 42667)       | 116 (100.6, 133.9)   |
| <b>Taiwan (Province of China)</b>       | 25714 (22374, 29517)       | 133.1 (116.3, 152.2) | 64719 (56405, 74030)       | 191.3 (165.8, 218.4) |
| <b>Southeast Asia</b>                   | 150211 (134393, 167862)    | 43.1 (38.5, 47.8)    | 425104 (373523, 479735)    | 61 (54, 68.5)        |
| <b>Cambodia</b>                         | 3171 (2772, 3612)          | 50.4 (43.7, 57.3)    | 9785 (8326, 11325)         | 69.1 (59.2, 79.9)    |
| <b>Indonesia</b>                        | 70478 (63252, 77915)       | 50.2 (45.4, 55.4)    | 137709 (122823, 153494)    | 51.4 (46.1, 56.9)    |
| <b>Laos</b>                             | 982 (850, 1122)            | 35.5 (30.8, 40.7)    | 3225 (2765, 3726)          | 55.5 (47.7, 63.9)    |
| <b>Malaysia</b>                         | 3538 (2995, 4129)          | 26.9 (22.9, 31.2)    | 16790 (14409, 19550)       | 55.1 (47.5, 64)      |
| <b>Maldives</b>                         | 38 (33, 43)                | 28.6 (25.1, 32.5)    | 252 (216, 291)             | 56.8 (49.2, 64.5)    |
| <b>Mauritius</b>                        | 425 (369, 489)             | 44.6 (38.8, 51.3)    | 1020 (883, 1163)           | 62 (53.8, 70.2)      |
| <b>Myanmar</b>                          | 13560 (11734, 15645)       | 44.9 (38.6, 51.9)    | 36144 (31091, 41919)       | 66.9 (57.9, 77.1)    |
| <b>Philippines</b>                      | 6840 (6009, 7737)          | 15.3 (13.5, 17.3)    | 29956 (25716, 34333)       | 32.4 (28, 37.1)      |



|                                       |                         |                      |                            |                      |
|---------------------------------------|-------------------------|----------------------|----------------------------|----------------------|
| <b>Sri Lanka</b>                      | 5350 (4654, 6103)       | 37 (32.3, 42)        | 14125 (12264, 16079)       | 56.5 (49.4, 64.3)    |
| <b>Seychelles</b>                     | 26 (22, 30)             | 44.5 (37.8, 51.4)    | 105 (87, 125)              | 86.9 (72.6, 102)     |
| <b>Thailand</b>                       | 22596 (19208, 26586)    | 46.2 (39.5, 54)      | 77118 (65494, 91004)       | 79.9 (68.5, 93.5)    |
| <b>East Timor</b>                     | 160 (139, 186)          | 31.9 (27.6, 36.4)    | 501 (429, 577)             | 54.4 (46.3, 62.7)    |
| <b>Vietnam</b>                        | 22848 (20049, 25745)    | 48.4 (42.3, 55)      | 97815 (83397, 112977)      | 91.9 (78.8, 105.3)   |
| <b>Oceania</b>                        | 2462 (2106, 2851)       | 53.4 (45.7, 61.7)    | 7653 (6395, 9083)          | 74.9 (63.3, 88.1)    |
| <b>American Samoa</b>                 | 32 (26, 39)             | 91.3 (74.6, 110.5)   | 72 (58, 86)                | 135.4 (110.6, 163.1) |
| <b>Federated States of Micronesia</b> | 47 (41, 54)             | 69.7 (60.8, 79.4)    | 97 (85, 111)               | 103.1 (89.9, 117)    |
| <b>Fiji</b>                           | 245 (214, 279)          | 41.9 (36.6, 47.4)    | 690 (599, 787)             | 76.2 (66.2, 86.6)    |
| <b>Guam</b>                           | 94 (82, 107)            | 80.2 (70.5, 90.9)    | 200 (174, 226)             | 109.6 (95.5, 124.2)  |
| <b>Kiribati</b>                       | 39 (34, 44)             | 70.4 (61.2, 79.8)    | 107 (94, 122)              | 108.9 (95, 123.9)    |
| <b>Marshall Islands</b>               | 21 (18, 24)             | 78.6 (68.6, 89.3)    | 56 (49, 64)                | 112.8 (98.3, 127.5)  |
| <b>Northern Mariana Islands</b>       | 33 (28, 38)             | 84 (73.4, 94.7)      | 59 (51, 68)                | 100.8 (88.1, 114.2)  |
| <b>Papua New Guinea</b>               | 1442 (1203, 1699)       | 49.6 (41.6, 58.4)    | 5006 (4093, 6042)          | 68.2 (56.4, 81.7)    |
| <b>Samoa</b>                          | 91 (79, 104)            | 80.9 (70.2, 92.7)    | 193 (167, 220)             | 116.8 (100.9, 133)   |
| <b>Solomon Islands</b>                | 123 (106, 141)          | 57.5 (49.5, 66.1)    | 421 (363, 487)             | 85.7 (73.7, 98.1)    |
| <b>Tonga</b>                          | 64 (55, 73)             | 92.4 (79.3, 105.2)   | 130 (111, 149)             | 143.1 (122.5, 164.3) |
| <b>Vanuatu</b>                        | 69 (58, 80)             | 67.7 (57, 79.2)      | 200 (169, 234)             | 89.2 (74.8, 103.9)   |
| <b>North Africa and Middle East</b>   | 395083 (352798, 443650) | 170.1 (151.7, 190.7) | 1248732 (1110015, 1402150) | 228.3 (203.7, 255)   |
| <b>Afghanistan</b>                    | 12939 (11372, 14644)    | 171.1 (150.7, 193.6) | 39049 (32244, 46048)       | 210.4 (176.1, 245.4) |
| <b>Algeria</b>                        | 23933 (21282, 26697)    | 147.5 (130.5, 165)   | 88837 (78271, 98982)       | 225 (199.4, 250.6)   |
| <b>Bahrain</b>                        | 709 (629, 795)          | 189.7 (170.8, 208.8) | 4456 (3921, 5000)          | 258.4 (232.2, 285.1) |
| <b>Egypt</b>                          | 124238 (105150, 145475) | 312.3 (264.4, 364.9) | 276717 (235888, 321818)    | 340.2 (292, 393.6)   |
| <b>Iran</b>                           | 38147 (35046, 41430)    | 100.7 (92.2, 109.3)  | 139487 (127322, 152034)    | 162.3 (148.4, 176.2) |
| <b>Iraq</b>                           | 18409 (16547, 20375)    | 172.1 (155.2, 189.9) | 60083 (53625, 66748)       | 184.6 (165.8, 204.2) |

|                                    |                         |                      |                         |                      |
|------------------------------------|-------------------------|----------------------|-------------------------|----------------------|
| <b>Jordan</b>                      | 4504 (4055, 4989)       | 205.4 (185.5, 225.9) | 28125 (25315, 31066)    | 324.5 (293.7, 357)   |
| <b>Kuwait</b>                      | 2062 (1805, 2332)       | 152.6 (135.9, 169.8) | 12105 (10415, 13689)    | 262.3 (231.7, 293.9) |
| <b>Lebanon</b>                     | 4570 (4123, 5040)       | 159.7 (143.8, 175.8) | 18656 (16603, 20707)    | 253.6 (226.8, 280.2) |
| <b>Libya</b>                       | 5244 (4700, 5824)       | 198.9 (177.8, 220.4) | 20715 (18360, 23176)    | 315.3 (283, 348.7)   |
| <b>Morocco</b>                     | 27281 (24192, 30605)    | 150.1 (133.1, 168.2) | 82982 (73157, 93288)    | 231.2 (204.3, 259.2) |
| <b>Palestine</b>                   | 1922 (1747, 2107)       | 166.8 (150.8, 183.1) | 7972 (7077, 8860)       | 227.7 (202.6, 253.3) |
| <b>Oman</b>                        | 1813 (1605, 2050)       | 148.9 (133, 165.5)   | 10908 (9590, 12238)     | 265.3 (237.8, 294.2) |
| <b>Qatar</b>                       | 909 (741, 1087)         | 256.1 (217.4, 297.5) | 8529 (7309, 9780)       | 304 (269.4, 341)     |
| <b>Saudi Arabia</b>                | 17810 (15356, 20673)    | 174.7 (152.2, 200.1) | 93459 (78870, 110286)   | 276.3 (238.4, 318.3) |
| <b>Sudan</b>                       | 21706 (19104, 24538)    | 172.3 (151.6, 196)   | 63806 (55371, 72801)    | 239.4 (208.1, 270.3) |
| <b>Syria</b>                       | 12329 (11147, 13594)    | 164.8 (148.6, 181.1) | 38919 (34845, 43172)    | 243.9 (219.8, 269.7) |
| <b>Tunisia</b>                     | 14835 (12578, 17543)    | 234 (196.9, 276.1)   | 45139 (37987, 53057)    | 349.8 (296, 409.7)   |
| <b>Turkey</b>                      | 48173 (42381, 54631)    | 107.5 (94.5, 121.5)  | 138696 (122292, 157530) | 154.2 (136.1, 174.8) |
| <b>United Arab Emirates</b>        | 2413 (2095, 2738)       | 171.4 (154, 189.7)   | 32152 (27745, 36819)    | 265.9 (237.7, 294.6) |
| <b>Yemen</b>                       | 10884 (9355, 12536)     | 148.3 (126.2, 170.7) | 36774 (30667, 43534)    | 189.1 (158.1, 223.8) |
| <b>South Asia</b>                  | 210504 (189894, 230604) | 24.7 (22.4, 27.2)    | 529105 (473752, 587934) | 31.9 (28.6, 35.3)    |
| <b>Bangladesh</b>                  | 23231 (20496, 26035)    | 32.5 (28.5, 36.6)    | 53111 (46425, 59499)    | 36.3 (31.8, 40.7)    |
| <b>Bhutan</b>                      | 143 (125, 163)          | 38.2 (33.4, 43.7)    | 378 (327, 433)          | 43.4 (37.7, 49.6)    |
| <b>India</b>                       | 158631 (144332, 172708) | 22.9 (20.9, 25)      | 400325 (360972, 439858) | 30.3 (27.3, 33.3)    |
| <b>Nepal</b>                       | 3470 (2985, 4020)       | 25 (21.5, 28.9)      | 8187 (6976, 9481)       | 31.3 (26.7, 36.2)    |
| <b>Pakistan</b>                    | 25030 (21361, 29244)    | 34.2 (29.3, 40)      | 67103 (56856, 78847)    | 40.4 (34.4, 47.2)    |
| <b>Southern sub-Saharan Africa</b> | 41378 (37301, 45595)    | 112.6 (101.4, 123.9) | 76067 (67708, 84642)    | 110.1 (98.6, 122.2)  |
| <b>Botswana</b>                    | 638 (558, 730)          | 80 (69.8, 91.6)      | 2180 (1879, 2520)       | 110 (96.3, 125.7)    |
| <b>Lesotho</b>                     | 1052 (913, 1194)        | 86.4 (75.6, 98.3)    | 1683 (1451, 1941)       | 107.3 (93.3, 123.2)  |
| <b>Namibia</b>                     | 554 (477, 641)          | 61.1 (52.6, 70.6)    | 1505 (1273, 1759)       | 82 (70.1, 95)        |

|                                   |                         |                      |                         |                      |
|-----------------------------------|-------------------------|----------------------|-------------------------|----------------------|
| <b>South Africa</b>               | 32540 (29550, 35536)    | 118.2 (107.2, 128.9) | 58714 (52806, 64627)    | 111.1 (100.4, 122.1) |
| <b>Swaziland</b>                  | 503 (441, 571)          | 111.8 (98.2, 126.3)  | 1019 (887, 1168)        | 125.4 (109.8, 142.5) |
| <b>Zimbabwe</b>                   | 6091 (5281, 6981)       | 104 (90.2, 119.2)    | 10966 (9201, 12952)     | 108.3 (91.7, 127)    |
| <b>Western sub-Saharan Africa</b> | 136431 (121562, 152996) | 112.4 (100.2, 125.6) | 354622 (312352, 400636) | 129.1 (114.3, 145.4) |
| <b>Benin</b>                      | 3038 (2699, 3422)       | 111.1 (98.5, 124.1)  | 10179 (8917, 11580)     | 142.9 (126.2, 161.8) |
| <b>Burkina Faso</b>               | 6386 (5633, 7161)       | 112 (99, 125.9)      | 18443 (16087, 21072)    | 140.8 (122.9, 159.9) |
| <b>Cameroon</b>                   | 8722 (7582, 9902)       | 136.9 (119.7, 155.3) | 27053 (23533, 30982)    | 151.9 (132, 173.1)   |
| <b>Cape Verde</b>                 | 196 (176, 217)          | 89 (79.4, 99.2)      | 662 (583, 746)          | 132.6 (116.8, 148.9) |
| <b>Chad</b>                       | 3693 (3231, 4181)       | 103.3 (90, 116.5)    | 9132 (7880, 10476)      | 111.3 (96.6, 127)    |
| <b>Côte d'Ivoire</b>              | 7354 (6470, 8284)       | 103.4 (91.9, 116.2)  | 21521 (18822, 24483)    | 125.4 (110.5, 141.3) |
| <b>The Gambia</b>                 | 598 (530, 674)          | 106.6 (94.8, 119.8)  | 1840 (1623, 2075)       | 135.6 (120.3, 152.6) |
| <b>Ghana</b>                      | 9712 (8581, 10915)      | 102.6 (90.9, 114.7)  | 30500 (26834, 34499)    | 135.1 (119.4, 152.1) |
| <b>Guinea</b>                     | 4415 (3920, 4942)       | 108 (95.7, 120.9)    | 8920 (7797, 10188)      | 120.5 (105.6, 137.7) |
| <b>Guinea-Bissau</b>              | 707 (625, 791)          | 120.4 (107, 134.5)   | 1631 (1426, 1847)       | 140.4 (123.6, 158.3) |
| <b>Liberia</b>                    | 1790 (1575, 2022)       | 132.4 (116.8, 149.3) | 4829 (4160, 5526)       | 149.8 (130.7, 169.8) |
| <b>Mali</b>                       | 6726 (5885, 7583)       | 122.8 (108.3, 138.2) | 17077 (14934, 19421)    | 144.8 (126.5, 164.3) |
| <b>Mauritania</b>                 | 1527 (1346, 1726)       | 117 (103.5, 132.1)   | 4016 (3487, 4614)       | 151.6 (131.8, 175)   |
| <b>Niger</b>                      | 4733 (4171, 5359)       | 105.5 (93.1, 119)    | 14470 (12519, 16598)    | 128.8 (112.6, 146.8) |
| <b>Nigeria</b>                    | 66849 (59353, 75022)    | 112.6 (100.1, 126.2) | 157985 (138484, 179368) | 122.6 (107.7, 138.8) |
| <b>São Tomé and Príncipe</b>      | 117 (104, 130)          | 158 (140.1, 176.7)   | 264 (232, 299)          | 177.5 (156.6, 200)   |
| <b>Senegal</b>                    | 4352 (3862, 4866)       | 97.7 (86.8, 108.6)   | 12705 (11171, 14296)    | 128.5 (113.7, 144.8) |
| <b>Sierra Leone</b>               | 3336 (2950, 3745)       | 133.6 (118.3, 149.8) | 6879 (6005, 7835)       | 133.9 (117, 151.1)   |
| <b>Togo</b>                       | 2176 (1893, 2468)       | 107.5 (95.3, 121.5)  | 6513 (5658, 7427)       | 121 (106.5, 137.1)   |
| <b>Eastern sub-Saharan Africa</b> | 123987 (111000, 137630) | 112.1 (100.6, 124.2) | 300870 (266515, 336881) | 123.9 (110.5, 137.6) |
| <b>Burundi</b>                    | 3976 (3484, 4498)       | 122.5 (108, 138.2)   | 7945 (6868, 9153)       | 118.2 (102.7, 134.8) |

|                                   |                      |                      |                      |                      |
|-----------------------------------|----------------------|----------------------|----------------------|----------------------|
| <b>Comoros</b>                    | 292 (256, 328)       | 105.1 (92.3, 117.7)  | 758 (663, 858)       | 129.6 (113.9, 146.5) |
| <b>Djibouti</b>                   | 278 (243, 312)       | 99.1 (87.6, 110.8)   | 1329 (1145, 1532)    | 143.6 (124.9, 163.5) |
| <b>Eritrea</b>                    | 1704 (1481, 1941)    | 105.7 (92.3, 120.4)  | 4677 (4018, 5388)    | 121.2 (105.2, 138.1) |
| <b>Ethiopia</b>                   | 28924 (26112, 31891) | 96.2 (87.3, 105.5)   | 61653 (55736, 67834) | 98.9 (89.4, 108.4)   |
| <b>Kenya</b>                      | 18131 (16427, 20140) | 146.1 (132, 161.6)   | 50642 (45328, 56694) | 153.8 (137.9, 171.3) |
| <b>Madagascar</b>                 | 7350 (6446, 8248)    | 102.5 (90.7, 115.4)  | 18603 (16120, 21464) | 111.4 (97.6, 127.4)  |
| <b>Malawi</b>                     | 7508 (6592, 8449)    | 131.8 (116.4, 148.6) | 15473 (13546, 17542) | 146.2 (128.2, 165.5) |
| <b>Mozambique</b>                 | 8726 (7693, 9881)    | 98 (86.8, 110.4)     | 22582 (19780, 25554) | 130 (114.6, 146.3)   |
| <b>Rwanda</b>                     | 5683 (4885, 6525)    | 133.8 (115.5, 152.4) | 10714 (9181, 12403)  | 124.6 (107.4, 142.8) |
| <b>Somalia</b>                    | 4759 (4134, 5434)    | 107.6 (94.2, 121.1)  | 12783 (11114, 14629) | 126.4 (110.6, 142.8) |
| <b>South Sudan</b>                | 4358 (3783, 4990)    | 123.7 (107.6, 141.3) | 8715 (7570, 10033)   | 143.4 (126, 163.1)   |
| <b>Tanzania</b>                   | 16478 (14674, 18390) | 109.5 (97.6, 122.7)  | 44779 (39111, 50671) | 130 (114.1, 146.1)   |
| <b>Uganda</b>                     | 9871 (8715, 11118)   | 105.4 (92.8, 118.9)  | 26060 (22718, 29612) | 122 (106.6, 137.5)   |
| <b>Zambia</b>                     | 5888 (5181, 6641)    | 136 (120, 153.1)     | 13969 (12252, 15930) | 132.9 (117.2, 151.2) |
| <b>Central sub-Saharan Africa</b> | 30441 (26873, 34300) | 90.1 (79.7, 101)     | 82183 (70848, 94978) | 102.9 (89.3, 118.1)  |
| <b>Angola</b>                     | 6060 (5304, 6861)    | 95.8 (84, 107.8)     | 21585 (18907, 24509) | 124.2 (109.3, 140.2) |
| <b>Central African Republic</b>   | 1403 (1227, 1606)    | 80.1 (70.3, 90.9)    | 2919 (2475, 3429)    | 87.4 (74.9, 102.2)   |
| <b>Congo</b>                      | 1352 (1196, 1521)    | 90.1 (79.5, 101.4)   | 3981 (3448, 4561)    | 101.8 (89.2, 115.8)  |
| <b>DR Congo</b>                   | 20688 (18160, 23330) | 88.9 (78.3, 100)     | 50808 (43403, 59234) | 95.9 (82.4, 111.2)   |
| <b>Equatorial Guinea</b>          | 241 (211, 273)       | 89.8 (78.7, 101.4)   | 1209 (994, 1455)     | 151.6 (125.3, 181.2) |
| <b>Gabon</b>                      | 696 (613, 783)       | 103 (90.6, 116.3)    | 1679 (1451, 1913)    | 119.6 (104, 136.2)   |

**Appendix Table 25: Number of prevalent cases and age-standardised prevalence rates of compensated cirrhosis due to other causes per 100 000 in 1990 and 2017 for both sexes by location**

|                                  | 1990                         |                       | 2017                          |                      |
|----------------------------------|------------------------------|-----------------------|-------------------------------|----------------------|
|                                  | Counts (95% UI)              | Rate (95% UI)         | Counts (95% UI)               | Rate (95% UI)        |
| <b>Global</b>                    | 10359652 (9472360, 11218885) | 189 (173, 204.6)      | 14963062 (13571830, 16244968) | 198.4 (180.1, 215.4) |
| <b>High-income North America</b> | 281504 (257327, 303584)      | 90.6 (82.9, 97.8)     | 431998 (393515, 470270)       | 91.7 (84.5, 99.2)    |
| <b>Canada</b>                    | 22225 (19546, 25165)         | 73.7 (65.2, 83)       | 36956 (31787, 42661)          | 76.2 (66.6, 86.1)    |
| <b>Greenland</b>                 | 34 (30, 39)                  | 65.5 (57.2, 74.2)     | 46 (39, 52)                   | 71.2 (62.6, 80.5)    |
| <b>USA</b>                       | 259238 (238071, 279499)      | 92.4 (84.9, 99.8)     | 394989 (360603, 428858)       | 93.5 (86.3, 100.7)   |
| <b>Australasia</b>               | 14835 (13249, 16409)         | 76.5 (68.4, 84.4)     | 22158 (19727, 24627)          | 85.6 (76.6, 95)      |
| <b>Australia</b>                 | 11464 (10122, 12773)         | 70.9 (62.9, 78.7)     | 17764 (15685, 19940)          | 80.8 (71.6, 90.2)    |
| <b>New Zealand</b>               | 3371 (3060, 3688)            | 103.6 (93.7, 113.6)   | 4394 (4016, 4767)             | 110.3 (100.3, 120.2) |
| <b>High-income Asia-Pacific</b>  | 1030186 (934881, 1136660)    | 637.9 (584, 695.1)    | 826087 (754654, 903917)       | 551 (507.7, 593.3)   |
| <b>Brunei</b>                    | 1570 (1417, 1729)            | 582.2 (527.6, 637.6)  | 2521 (2252, 2809)             | 628.3 (570, 695.9)   |
| <b>Japan</b>                     | 606282 (562677, 650043)      | 543.8 (504, 585.6)    | 520637 (482378, 560539)       | 525.1 (484.7, 566.3) |
| <b>Singapore</b>                 | 17015 (15230, 19007)         | 577.5 (522, 636.1)    | 29267 (25828, 32991)          | 599.6 (540.8, 664.8) |
| <b>South Korea</b>               | 405319 (347606, 494124)      | 945.3 (807.6, 1166.5) | 273661 (239760, 317062)       | 604.3 (545.6, 672.3) |
| <b>Western Europe</b>            | 1035172 (933487, 1145755)    | 254.7 (230.5, 280.3)  | 1312296 (1187403, 1451965)    | 288.7 (263.7, 316.9) |
| <b>Andorra</b>                   | 119 (105, 136)               | 214 (191.1, 239.9)    | 221 (193, 252)                | 269.5 (240.7, 301.8) |
| <b>Austria</b>                   | 28557 (25165, 32745)         | 348.9 (311, 391.9)    | 34177 (30218, 38524)          | 369.1 (329.9, 409.9) |
| <b>Belgium</b>                   | 20719 (17691, 23795)         | 200.8 (173.6, 228.3)  | 26915 (23080, 30897)          | 231.5 (201.8, 263.9) |
| <b>Cyprus</b>                    | 1210 (1082, 1361)            | 153.2 (136.9, 171.7)  | 2245 (1973, 2562)             | 173.2 (154.4, 193.9) |
| <b>Denmark</b>                   | 10240 (9143, 11494)          | 196.7 (177, 220)      | 17440 (15570, 19588)          | 294 (264.9, 328.1)   |
| <b>Finland</b>                   | 10460 (9343, 11718)          | 211.2 (189.6, 234.8)  | 17341 (15436, 19589)          | 297.1 (267.3, 332.5) |
| <b>France</b>                    | 149339 (131114, 167927)      | 245.6 (217.9, 274.6)  | 177339 (158219, 199294)       | 259.6 (234.1, 290.2) |

|                       |                         |                      |                         |                      |
|-----------------------|-------------------------|----------------------|-------------------------|----------------------|
| <b>Germany</b>        | 209038 (184107, 236882) | 246.4 (220.3, 275.6) | 287894 (252842, 325907) | 319.8 (285.6, 356.7) |
| <b>Greece</b>         | 24426 (21553, 27606)    | 220.2 (196.5, 246.3) | 25642 (22782, 29042)    | 240.4 (215.5, 267.7) |
| <b>Iceland</b>        | 445 (395, 496)          | 171.3 (153.4, 190.4) | 975 (863, 1105)         | 278.7 (248, 312.9)   |
| <b>Ireland</b>        | 6134 (5557, 6741)       | 166.1 (150.4, 183.1) | 11659 (10352, 13069)    | 240.4 (214.8, 267.4) |
| <b>Israel</b>         | 10929 (9860, 12113)     | 219.6 (196.5, 245.6) | 24424 (21926, 27263)    | 270.4 (242.5, 302.5) |
| <b>Italy</b>          | 194782 (165968, 229040) | 317.7 (276.3, 367.8) | 193431 (168385, 223963) | 310.6 (275.4, 350.7) |
| <b>Luxembourg</b>     | 1337 (1177, 1531)       | 327.1 (291.6, 369.8) | 2233 (1970, 2518)       | 363.6 (324.2, 405.4) |
| <b>Malta</b>          | 515 (458, 582)          | 136.8 (122.3, 153.3) | 708 (619, 806)          | 157.5 (140.5, 176)   |
| <b>Netherlands</b>    | 30649 (27256, 34402)    | 198.8 (178.2, 220.5) | 43390 (38453, 48594)    | 244.7 (220.6, 271.8) |
| <b>Norway</b>         | 12150 (11255, 13048)    | 287.8 (265.7, 309.8) | 17455 (16180, 18865)    | 346.9 (320.4, 373.2) |
| <b>Portugal</b>       | 23961 (20547, 27619)    | 215.4 (186.5, 247.1) | 21369 (18730, 24435)    | 190.2 (169.1, 214.2) |
| <b>Spain</b>          | 56994 (48908, 65155)    | 142.4 (122.5, 162)   | 59197 (50906, 67555)    | 149.1 (129, 169.6)   |
| <b>Sweden</b>         | 25763 (23727, 27731)    | 303.3 (279.9, 324.9) | 43981 (40448, 47862)    | 440.9 (406.3, 478)   |
| <b>Switzerland</b>    | 12506 (11108, 14118)    | 175.6 (157.5, 196)   | 18201 (16082, 20565)    | 204.6 (182.6, 227.5) |
| <b>United Kingdom</b> | 203901 (190561, 216363) | 335.2 (312.2, 356.7) | 284698 (265779, 305707) | 382.8 (357.7, 409.8) |
| <b>Eastern Europe</b> | 627073 (575922, 678934) | 304 (278.9, 330)     | 700578 (640477, 759171) | 401.2 (366, 438.1)   |
| <b>Belarus</b>        | 26043 (23242, 28918)    | 273.2 (243.6, 303.1) | 27793 (24534, 31237)    | 359.7 (317.7, 400.3) |
| <b>Estonia</b>        | 3813 (3389, 4247)       | 271 (239.5, 301.3)   | 3618 (3201, 4047)       | 339.8 (301.2, 380)   |
| <b>Latvia</b>         | 6137 (5497, 6830)       | 253.6 (228.1, 281)   | 5115 (4540, 5696)       | 328 (292.2, 363.2)   |
| <b>Lithuania</b>      | 10240 (9112, 11343)     | 296.1 (262.7, 326.3) | 8983 (7996, 10065)      | 382.1 (337.9, 427.1) |
| <b>Moldova</b>        | 20369 (18078, 22798)    | 463 (410.9, 517.6)   | 15164 (13270, 17212)    | 447.9 (395.1, 501.2) |
| <b>Russia</b>         | 414044 (379988, 448025) | 300.6 (276.3, 326.8) | 488790 (447532, 530231) | 399.5 (365.3, 436.6) |
| <b>Ukraine</b>        | 146426 (134353, 159028) | 311.7 (285.7, 339.8) | 151115 (138306, 163590) | 418.5 (382.5, 455.5) |
| <b>Central Europe</b> | 399863 (362665, 438474) | 346.4 (313.8, 379.5) | 324349 (289749, 360324) | 358.7 (322.4, 395.2) |
| <b>Albania</b>        | 11172 (10009, 12314)    | 306.8 (276.3, 337.4) | 8399 (7451, 9376)       | 340.3 (305.4, 376.2) |

|                               |                         |                      |                         |                      |
|-------------------------------|-------------------------|----------------------|-------------------------|----------------------|
| <b>Bosnia and Herzegovina</b> | 14345 (12794, 15854)    | 329.4 (296.2, 363.2) | 9452 (8362, 10612)      | 342.6 (305.1, 379.3) |
| <b>Bulgaria</b>               | 23843 (21570, 26277)    | 307.8 (278.5, 338.9) | 17714 (15738, 19813)    | 333.7 (298.7, 369.6) |
| <b>Croatia</b>                | 15683 (13943, 17381)    | 358.6 (321.4, 396.4) | 10876 (9660, 12100)     | 315.8 (284, 347.8)   |
| <b>Czech Republic</b>         | 26001 (23446, 28567)    | 278.3 (250.5, 306.3) | 24846 (22202, 27532)    | 306 (275.3, 338)     |
| <b>Hungary</b>                | 36353 (32631, 40375)    | 386.7 (345.9, 429.4) | 24479 (21783, 27260)    | 327.8 (292.7, 363.7) |
| <b>Macedonia</b>              | 5494 (4912, 6085)       | 278.9 (250, 308.1)   | 5438 (4847, 6080)       | 309.4 (276.1, 342.5) |
| <b>Montenegro</b>             | 1569 (1407, 1726)       | 258.7 (232, 284.3)   | 1598 (1418, 1783)       | 304.8 (272.4, 338.4) |
| <b>Poland</b>                 | 127719 (115760, 140351) | 350.3 (317.4, 386.2) | 118124 (105227, 132340) | 403 (360.6, 448)     |
| <b>Romania</b>                | 90026 (80498, 99067)    | 403.7 (360.5, 445)   | 61807 (54860, 69181)    | 384.7 (344.5, 426.9) |
| <b>Serbia</b>                 | 16269 (14558, 17991)    | 189.5 (170, 208.8)   | 15644 (13950, 17370)    | 212.2 (191.4, 234.4) |
| <b>Slovakia</b>               | 24787 (22201, 27285)    | 495.1 (443.2, 546.4) | 20867 (18702, 23339)    | 499.5 (448.7, 553.2) |
| <b>Slovenia</b>               | 6602 (5915, 7329)       | 362.4 (324.6, 401.3) | 5106 (4533, 5678)       | 314.4 (281.4, 348.4) |
| <b>Central Asia</b>           | 175528 (158637, 192016) | 229.9 (208, 251.8)   | 250080 (220986, 279386) | 278.1 (247.4, 308.6) |
| <b>Armenia</b>                | 6376 (5672, 7056)       | 182.7 (163.4, 202.4) | 6330 (5590, 7089)       | 241.2 (214.7, 268.5) |
| <b>Azerbaijan</b>             | 16265 (14522, 17940)    | 208 (186.3, 229.2)   | 23705 (20809, 26575)    | 248.2 (219.8, 276.3) |
| <b>Georgia</b>                | 10255 (9155, 11305)     | 194.3 (173.9, 214.5) | 6860 (5705, 7738)       | 221.3 (182.2, 248.8) |
| <b>Kazakhstan</b>             | 31791 (28503, 35328)    | 181 (162.4, 201)     | 45475 (40068, 50994)    | 267.9 (236.5, 298.8) |
| <b>Kyrgyzstan</b>             | 11549 (10281, 12737)    | 237.5 (211.7, 261.3) | 18614 (16475, 20819)    | 282.5 (249.8, 315.5) |
| <b>Mongolia</b>               | 6739 (6011, 7443)       | 269.7 (241.1, 297.9) | 8178 (7172, 9197)       | 260 (229.3, 290)     |
| <b>Tajikistan</b>             | 16267 (14655, 17895)    | 254.1 (228, 278.3)   | 27514 (24339, 30614)    | 273.4 (242.6, 303.1) |
| <b>Turkmenistan</b>           | 11396 (10204, 12541)    | 269.9 (242.1, 296.7) | 15841 (14035, 17772)    | 319.6 (283.9, 356.6) |
| <b>Uzbekistan</b>             | 64890 (58808, 71453)    | 271.2 (244.4, 298.1) | 97563 (86126, 109052)   | 296 (263.6, 329.9)   |
| <b>Central Latin America</b>  | 328458 (301005, 355445) | 222.6 (203.9, 240.6) | 577574 (525177, 634747) | 230 (209.2, 252.3)   |
| <b>Colombia</b>               | 42380 (37903, 47046)    | 133.7 (119, 148.9)   | 80819 (70710, 91765)    | 157.9 (138.6, 179)   |
| <b>Costa Rica</b>             | 4310 (3806, 4800)       | 150.8 (132.5, 169.5) | 8661 (7491, 9902)       | 182.8 (158.6, 207.7) |

|                             |                         |                      |                         |                      |
|-----------------------------|-------------------------|----------------------|-------------------------|----------------------|
| <b>El Salvador</b>          | 9197 (8204, 10167)      | 183.5 (161.2, 206.3) | 12773 (11124, 14657)    | 214.1 (186.2, 246.6) |
| <b>Guatemala</b>            | 17929 (16177, 19756)    | 236.6 (209.1, 265.6) | 37519 (32604, 42842)    | 248.4 (213.8, 284.6) |
| <b>Honduras</b>             | 10969 (9932, 12100)     | 247.5 (218.3, 278.8) | 20714 (18039, 23564)    | 245.2 (210.5, 283)   |
| <b>Mexico</b>               | 207778 (191669, 223185) | 282.4 (260.8, 303.6) | 346620 (319462, 375599) | 278.1 (256.5, 301.3) |
| <b>Nicaragua</b>            | 5864 (5199, 6512)       | 165.2 (145.1, 186.9) | 11619 (10078, 13294)    | 195.3 (169.3, 224.1) |
| <b>Panama</b>               | 3359 (2999, 3738)       | 145.6 (128.9, 163.6) | 6853 (5972, 7827)       | 173.9 (151.2, 198.1) |
| <b>Venezuela</b>            | 26674 (23629, 29734)    | 149.7 (131.5, 168.5) | 51996 (45197, 59567)    | 171.3 (149.7, 194.9) |
| <b>Andean Latin America</b> | 89478 (81027, 98190)    | 226.9 (203.6, 250.9) | 175148 (156399, 193075) | 287.3 (256, 316.8)   |
| <b>Bolivia</b>              | 13998 (12523, 15526)    | 216 (191.6, 239.9)   | 33888 (30099, 37750)    | 297 (263.8, 331.4)   |
| <b>Ecuador</b>              | 23379 (21255, 25766)    | 226.3 (203.5, 249.2) | 49051 (43626, 54611)    | 295.2 (262.4, 328.5) |
| <b>Peru</b>                 | 52101 (47085, 57400)    | 230.4 (206, 255.3)   | 92210 (82128, 101917)   | 280.4 (249.7, 310.1) |
| <b>Caribbean</b>            | 54771 (49005, 60727)    | 160.5 (142.5, 179.1) | 92951 (82259, 103536)   | 197.7 (175.3, 219.9) |
| <b>Antigua and Barbuda</b>  | 89 (79, 99)             | 150.9 (134.2, 168.3) | 171 (150, 192)          | 189.3 (167.5, 210.4) |
| <b>The Bahamas</b>          | 395 (349, 441)          | 163.4 (143.6, 183.1) | 744 (653, 834)          | 197.3 (174.6, 219.8) |
| <b>Barbados</b>             | 357 (318, 398)          | 137.7 (122.6, 153.2) | 564 (493, 633)          | 179.4 (158.9, 200.3) |
| <b>Belize</b>               | 285 (254, 316)          | 163.1 (144.2, 182.9) | 789 (695, 877)          | 206.3 (182.5, 229.2) |
| <b>Bermuda</b>              | 81 (71, 91)             | 139.6 (123.7, 155.4) | 122 (106, 138)          | 173.7 (153.8, 193.7) |
| <b>Cuba</b>                 | 15000 (13346, 16746)    | 138.7 (123.5, 154.2) | 23138 (20185, 26165)    | 189 (167, 211)       |
| <b>Dominica</b>             | 107 (96, 119)           | 143 (126.8, 159.1)   | 133 (117, 148)          | 184 (162.7, 204.6)   |
| <b>Dominican Republic</b>   | 13282 (11900, 14745)    | 196.8 (174.3, 221.2) | 21199 (18584, 23706)    | 206.1 (180.7, 230.2) |
| <b>Grenada</b>              | 133 (118, 147)          | 157.6 (138.6, 176.5) | 216 (191, 239)          | 186.7 (165.2, 207.1) |
| <b>Guyana</b>               | 1285 (1143, 1434)       | 181.8 (159.3, 204.4) | 1572 (1386, 1758)       | 213.7 (188.9, 239.7) |
| <b>Haiti</b>                | 8890 (7899, 9857)       | 149.5 (132.2, 168)   | 22801 (20144, 25335)    | 204.4 (179.7, 228.3) |
| <b>Jamaica</b>              | 3181 (2849, 3510)       | 133 (118.3, 148.3)   | 5005 (4415, 5595)       | 178.1 (157.4, 198.4) |
| <b>Puerto Rico</b>          | 6908 (6091, 7760)       | 189.4 (167.1, 213.4) | 8593 (7540, 9717)       | 205.8 (182.1, 229)   |



|                                         |                            |                      |                            |                      |
|-----------------------------------------|----------------------------|----------------------|----------------------------|----------------------|
| <b>Saint Lucia</b>                      | 214 (190, 237)             | 165.8 (145.5, 187.2) | 344 (303, 384)             | 190.9 (169.3, 211.9) |
| <b>Saint Vincent and the Grenadines</b> | 150 (134, 167)             | 138.6 (123.2, 154.5) | 201 (177, 225)             | 173.3 (153, 193.6)   |
| <b>Suriname</b>                         | 641 (570, 718)             | 173.3 (152.7, 194.5) | 1193 (1047, 1339)          | 205.7 (182, 229.2)   |
| <b>Trinidad and Tobago</b>              | 1734 (1541, 1931)          | 148.7 (131.4, 165.5) | 2587 (2262, 2896)          | 182.1 (161.1, 203)   |
| <b>Virgin Islands</b>                   | 165 (145, 186)             | 159.2 (140.3, 178.6) | 237 (204, 268)             | 202 (178.6, 224.8)   |
| <b>Tropical Latin America</b>           | 243760 (224174, 262354)    | 170 (157.1, 182.7)   | 353651 (325251, 381612)    | 156 (143.8, 167.6)   |
| <b>Brazil</b>                           | 239266 (220079, 257487)    | 171.1 (158.2, 183.9) | 343969 (316124, 370627)    | 156.4 (144.3, 167.9) |
| <b>Paraguay</b>                         | 4494 (3976, 4996)          | 124.5 (109.3, 139)   | 9682 (8451, 10957)         | 145.6 (127.4, 164.8) |
| <b>Southern Latin America</b>           | 103433 (92067, 115546)     | 209.5 (185.6, 234.8) | 181804 (159945, 204029)    | 266.5 (235.8, 298.5) |
| <b>Argentina</b>                        | 63838 (57083, 70972)       | 191.3 (170.5, 213.7) | 115696 (101892, 129598)    | 254.7 (224.1, 284.9) |
| <b>Chile</b>                            | 33642 (29499, 37922)       | 267.9 (233.8, 303.2) | 57188 (50092, 64922)       | 297 (262.4, 334.1)   |
| <b>Uruguay</b>                          | 5949 (5280, 6636)          | 182.6 (162.4, 204.2) | 8911 (7884, 10013)         | 245.3 (217.9, 274.8) |
| <b>East Asia</b>                        | 1748825 (1584713, 1916355) | 138.9 (126.1, 151.6) | 1872547 (1706600, 2046018) | 136.5 (124.4, 148.1) |
| <b>China</b>                            | 1671669 (1514018, 1832364) | 139.4 (126.4, 152.2) | 1762385 (1604886, 1924581) | 135.3 (123.7, 146.8) |
| <b>North Korea</b>                      | 23138 (20212, 25966)       | 116.5 (102.1, 129.9) | 38961 (33984, 44228)       | 160.9 (142.7, 179.7) |
| <b>Taiwan (Province of China)</b>       | 24882 (21716, 28109)       | 127.1 (111.4, 142.9) | 41036 (35081, 47026)       | 179.6 (158.4, 201.4) |
| <b>Southeast Asia</b>                   | 249118 (223269, 274627)    | 48.6 (43.6, 53.5)    | 347172 (305590, 387369)    | 53.8 (47.4, 59.9)    |
| <b>Cambodia</b>                         | 6270 (5557, 7055)          | 52.8 (46.8, 59.2)    | 9985 (8723, 11280)         | 61.1 (53.5, 68.8)    |
| <b>Indonesia</b>                        | 119568 (108001, 131141)    | 57.9 (52.6, 63.4)    | 118974 (106586, 131449)    | 47 (42.1, 51.7)      |
| <b>Laos</b>                             | 1856 (1624, 2076)          | 39.3 (34.5, 43.9)    | 3876 (3395, 4362)          | 53.4 (47, 60.1)      |
| <b>Malaysia</b>                         | 5713 (4942, 6530)          | 29.5 (25.5, 33.3)    | 12906 (11208, 14660)       | 43.2 (37.7, 48.8)    |
| <b>Maldives</b>                         | 88 (76, 99)                | 33.4 (29.2, 37.4)    | 192 (165, 219)             | 47.2 (41.3, 53.2)    |
| <b>Mauritius</b>                        | 443 (385, 498)             | 39.9 (35, 44.7)      | 550 (479, 625)             | 47.6 (41.6, 53.7)    |
| <b>Myanmar</b>                          | 20507 (17992, 23069)       | 46.8 (41.2, 52.3)    | 30667 (26692, 34669)       | 57.7 (50.5, 65.2)    |
| <b>Philippines</b>                      | 14684 (12737, 16495)       | 20.1 (17.6, 22.5)    | 32797 (27729, 37186)       | 30.6 (26, 34.5)      |

|                                       |                         |                      |                            |                      |
|---------------------------------------|-------------------------|----------------------|----------------------------|----------------------|
| <b>Sri Lanka</b>                      | 6772 (5962, 7636)       | 38 (33·7, 42·6)      | 10602 (9207, 11971)        | 50·5 (44, 56·7)      |
| <b>Seychelles</b>                     | 27 (24, 31)             | 35·8 (31·3, 40·2)    | 48 (42, 55)                | 51·2 (44·7, 57·8)    |
| <b>Thailand</b>                       | 24725 (21432, 27873)    | 42·2 (36·9, 47·3)    | 36630 (31088, 42138)       | 56·9 (49·3, 64·1)    |
| <b>East Timor</b>                     | 311 (273, 349)          | 36·4 (32, 40·8)      | 760 (662, 854)             | 53·2 (46·5, 59·9)    |
| <b>Vietnam</b>                        | 47824 (41880, 54061)    | 62·5 (54·8, 70·3)    | 88727 (74332, 101561)      | 99·5 (83·3, 114)     |
| <b>Oceania</b>                        | 5421 (4756, 6116)       | 71·2 (62·6, 80·1)    | 12658 (11100, 14362)       | 90·3 (79·3, 101·9)   |
| <b>American Samoa</b>                 | 37 (32, 42)             | 66 (57·8, 74·4)      | 49 (43, 56)                | 80·2 (70·1, 91·1)    |
| <b>Federated States of Micronesia</b> | 103 (90, 116)           | 80·7 (70·4, 91)      | 105 (91, 119)              | 91·8 (80·2, 103·8)   |
| <b>Fiji</b>                           | 506 (444, 572)          | 58·1 (51·4, 65·2)    | 734 (643, 828)             | 80·4 (70·5, 90·6)    |
| <b>Guam</b>                           | 110 (96, 124)           | 79·3 (69·8, 89)      | 144 (127, 163)             | 88 (77·5, 99·4)      |
| <b>Kiribati</b>                       | 68 (60, 77)             | 80·2 (70·9, 90·3)    | 128 (112, 145)             | 98·1 (85·8, 110·9)   |
| <b>Marshall Islands</b>               | 47 (41, 53)             | 80·1 (70·3, 90·5)    | 57 (50, 65)                | 93·5 (81·9, 106·4)   |
| <b>Northern Mariana Islands</b>       | 32 (28, 37)             | 74·6 (65·8, 84·2)    | 37 (32, 42)                | 87·6 (77·4, 98·8)    |
| <b>Papua New Guinea</b>               | 3443 (3012, 3903)       | 71·5 (62·7, 80·4)    | 9383 (8207, 10648)         | 90·4 (79·3, 101·9)   |
| <b>Samoa</b>                          | 154 (132, 175)          | 76 (66·2, 85·5)      | 203 (178, 231)             | 90·2 (79, 102·3)     |
| <b>Solomon Islands</b>                | 305 (267, 346)          | 72·5 (63·9, 81·8)    | 680 (594, 770)             | 92·6 (81·4, 104·3)   |
| <b>Tonga</b>                          | 97 (85, 110)            | 82·8 (72·5, 93·3)    | 111 (97, 126)              | 98·1 (86·1, 110·2)   |
| <b>Vanuatu</b>                        | 161 (140, 181)          | 88·9 (78·2, 100·5)   | 330 (288, 374)             | 100·9 (88·3, 114·2)  |
| <b>North Africa and Middle East</b>   | 873432 (777637, 971715) | 221 (198·3, 245·1)   | 1470961 (1307487, 1634486) | 242·5 (216·2, 268·8) |
| <b>Afghanistan</b>                    | 31096 (27563, 34833)    | 255·1 (226·1, 285·6) | 115268 (101749, 129505)    | 288 (255·5, 321·7)   |
| <b>Algeria</b>                        | 67368 (59526, 75356)    | 224 (198·5, 250·2)   | 96698 (84939, 108082)      | 251·9 (221·9, 281·2) |
| <b>Bahrain</b>                        | 1098 (971, 1237)        | 222·9 (197·6, 250·2) | 2786 (2443, 3123)          | 242·9 (215·8, 270·7) |
| <b>Egypt</b>                          | 187919 (165200, 213249) | 309·2 (272·4, 350·2) | 283143 (247158, 321959)    | 278·2 (242·8, 316·5) |
| <b>Iran</b>                           | 125477 (112984, 138146) | 170·9 (154·4, 187·4) | 144070 (129274, 158109)    | 198·6 (178, 218·2)   |
| <b>Iraq</b>                           | 45051 (39889, 50385)    | 212·5 (188·5, 237·1) | 110626 (97668, 123570)     | 227·2 (200·9, 253·1) |

|                                    |                            |                      |                            |                      |
|------------------------------------|----------------------------|----------------------|----------------------------|----------------------|
| <b>Jordan</b>                      | 12547 (11084, 14092)       | 273.3 (243.7, 304.8) | 36985 (32485, 41232)       | 324.6 (285.2, 361.1) |
| <b>Kuwait</b>                      | 3227 (2831, 3621)          | 181.6 (161.4, 202.2) | 7468 (6491, 8417)          | 218.7 (194, 243.3)   |
| <b>Lebanon</b>                     | 10478 (9306, 11705)        | 218.3 (193.8, 243.8) | 21641 (19019, 24191)       | 251.7 (222.8, 281.2) |
| <b>Libya</b>                       | 10921 (9648, 12238)        | 218.9 (194.1, 243.5) | 17010 (14973, 19056)       | 254.3 (224.7, 284.6) |
| <b>Morocco</b>                     | 64706 (57428, 72438)       | 227.2 (201.8, 253.7) | 89771 (79431, 100222)      | 257.1 (228.4, 286.2) |
| <b>Palestine</b>                   | 5589 (4968, 6261)          | 224.5 (198.8, 250.7) | 14192 (12513, 15852)       | 259.7 (229.7, 289.5) |
| <b>Oman</b>                        | 5007 (4439, 5600)          | 231.8 (205.4, 258.6) | 8779 (7666, 9916)          | 240.3 (213.2, 267.3) |
| <b>Qatar</b>                       | 844 (741, 952)             | 216.6 (192.2, 242.9) | 4321 (3710, 4941)          | 233.6 (206.4, 261.9) |
| <b>Saudi Arabia</b>                | 39661 (34488, 44931)       | 211.3 (185.1, 239.8) | 68312 (58556, 78792)       | 227.7 (199.2, 258.7) |
| <b>Sudan</b>                       | 60757 (53643, 68045)       | 257.1 (227.2, 287.1) | 129662 (114468, 144694)    | 280.4 (247.7, 311.6) |
| <b>Syria</b>                       | 35462 (31356, 39697)       | 225.5 (200.6, 250.8) | 51489 (45656, 57540)       | 250.8 (221.7, 280.2) |
| <b>Tunisia</b>                     | 26361 (23348, 29814)       | 286.2 (252.5, 322.5) | 35475 (30845, 40209)       | 329 (289, 369.3)     |
| <b>Turkey</b>                      | 94593 (83262, 106260)      | 148.2 (131.4, 166.2) | 122293 (107761, 136866)    | 161.7 (143, 180.7)   |
| <b>United Arab Emirates</b>        | 3797 (3352, 4273)          | 215.6 (190.8, 240.2) | 14560 (12496, 16676)       | 245.7 (216.9, 274)   |
| <b>Yemen</b>                       | 40911 (36320, 45819)       | 245.7 (218.5, 274.4) | 95038 (83575, 106653)      | 274 (243, 305.6)     |
| <b>South Asia</b>                  | 1229280 (1115691, 1342351) | 100.5 (91.4, 109.2)  | 2003469 (1797158, 2196053) | 107.8 (96.9, 117.9)  |
| <b>Bangladesh</b>                  | 173664 (155426, 192412)    | 139.7 (124.1, 154.8) | 189283 (166185, 210926)    | 116.8 (102.4, 129.9) |
| <b>Bhutan</b>                      | 752 (667, 835)             | 121.5 (108.7, 135.6) | 1117 (978, 1259)           | 116 (102.1, 129.7)   |
| <b>India</b>                       | 894855 (814123, 978159)    | 93.7 (85.5, 101.7)   | 1512026 (1361352, 1655810) | 105.8 (95.3, 115.6)  |
| <b>Nepal</b>                       | 22043 (19448, 24522)       | 103.3 (91, 115.1)    | 32570 (27737, 36973)       | 101.1 (85.9, 114.7)  |
| <b>Pakistan</b>                    | 137966 (121612, 153442)    | 115.9 (101.7, 130.5) | 268473 (234315, 301700)    | 115.3 (101, 129.2)   |
| <b>Southern sub-Saharan Africa</b> | 184851 (168302, 201283)    | 353 (321.7, 383.1)   | 226147 (204623, 247460)    | 296.3 (268, 323.5)   |
| <b>Botswana</b>                    | 3672 (3253, 4068)          | 284.9 (252, 318.5)   | 6569 (5778, 7363)          | 296 (261.8, 332.3)   |
| <b>Lesotho</b>                     | 5487 (4897, 6095)          | 305.1 (270, 342.4)   | 6053 (5331, 6782)          | 311.4 (275, 349.2)   |
| <b>Namibia</b>                     | 3356 (2982, 3718)          | 239.8 (212, 267.7)   | 6420 (5647, 7166)          | 275.4 (243.1, 307.7) |

|                                   |                         |                      |                            |                      |
|-----------------------------------|-------------------------|----------------------|----------------------------|----------------------|
| <b>South Africa</b>               | 131788 (120741, 142876) | 356.8 (327.2, 385.5) | 150266 (136777, 163737)    | 278.7 (254.7, 302.7) |
| <b>Swaziland</b>                  | 2438 (2160, 2709)       | 315.4 (278.8, 353)   | 3535 (3123, 3936)          | 317.6 (280.9, 355.2) |
| <b>Zimbabwe</b>                   | 38109 (33945, 42490)    | 377.2 (334.2, 422.3) | 53305 (47223, 59555)       | 367.8 (325.3, 410.8) |
| <b>Western sub-Saharan Africa</b> | 785095 (705620, 865968) | 416.2 (369.6, 465.3) | 1789126 (1590093, 1986095) | 420.3 (372.2, 470.1) |
| <b>Benin</b>                      | 20369 (18126, 22597)    | 431.7 (380, 481.8)   | 48913 (43187, 54359)       | 425.9 (376.7, 476.2) |
| <b>Burkina Faso</b>               | 46663 (42039, 51551)    | 485.4 (431.7, 541.3) | 102120 (90214, 114034)     | 492.3 (434.9, 552.3) |
| <b>Cameroon</b>                   | 41239 (36727, 45733)    | 414.5 (368.1, 465)   | 111697 (99041, 124520)     | 408.6 (360.7, 457.5) |
| <b>Cape Verde</b>                 | 1299 (1162, 1442)       | 357.9 (318.6, 397.3) | 2130 (1882, 2387)          | 390.9 (346.2, 437)   |
| <b>Chad</b>                       | 26342 (23500, 29237)    | 441.3 (391.1, 491.6) | 66100 (58681, 73485)       | 435.7 (383.9, 487.7) |
| <b>Côte d'Ivoire</b>              | 47375 (42230, 52905)    | 396.8 (353.9, 443.2) | 101208 (89842, 112551)     | 412.7 (363.9, 461.8) |
| <b>The Gambia</b>                 | 3895 (3473, 4325)       | 399.4 (356.8, 444.2) | 9332 (8234, 10331)         | 439.4 (387.5, 490.5) |
| <b>Ghana</b>                      | 56706 (50784, 63195)    | 393.9 (349.8, 440.7) | 120304 (106102, 134341)    | 407.4 (360.6, 456.9) |
| <b>Guinea</b>                     | 26022 (23292, 28819)    | 432.3 (384.2, 484.3) | 50344 (44798, 56218)       | 429.9 (379.8, 481.9) |
| <b>Guinea-Bissau</b>              | 4484 (4000, 4989)       | 448.9 (397.3, 502.9) | 7818 (6893, 8715)          | 424.3 (372.7, 473.7) |
| <b>Liberia</b>                    | 9059 (8127, 10031)      | 460.1 (409.2, 515.4) | 20758 (18359, 23114)       | 439.8 (387.5, 491.8) |
| <b>Mali</b>                       | 43417 (38537, 48157)    | 508.6 (450.9, 569.2) | 102230 (91135, 113879)     | 504.5 (444.6, 564.1) |
| <b>Mauritania</b>                 | 7805 (6927, 8644)       | 386.8 (343.5, 433.3) | 15312 (13628, 16942)       | 394 (346.9, 439.7)   |
| <b>Niger</b>                      | 36708 (32708, 40828)    | 455.4 (405.9, 508.9) | 105204 (92593, 117748)     | 491.4 (431.6, 550.3) |
| <b>Nigeria</b>                    | 348503 (311712, 385927) | 396.3 (351.1, 442.8) | 796196 (707658, 881943)    | 397.6 (353.4, 445.5) |
| <b>São Tomé and Príncipe</b>      | 707 (636, 779)          | 570.9 (507.2, 633.3) | 1037 (914, 1155)           | 523.4 (460.9, 582.8) |
| <b>Senegal</b>                    | 29053 (26018, 32133)    | 378.8 (337, 422.5)   | 61714 (54691, 68369)       | 423 (373.3, 474)     |
| <b>Sierra Leone</b>               | 19606 (17418, 21788)    | 524 (467.2, 588.5)   | 35879 (31635, 39840)       | 459.7 (404.3, 514.5) |
| <b>Togo</b>                       | 15822 (14185, 17506)    | 437.6 (390.2, 488)   | 30814 (27219, 34398)       | 416.4 (366.8, 467.5) |
| <b>Eastern sub-Saharan Africa</b> | 715709 (644181, 782749) | 397.7 (358, 438.7)   | 1554021 (1393845, 1708680) | 410.2 (368.6, 452.2) |
| <b>Burundi</b>                    | 21525 (19207, 23933)    | 430.7 (382.3, 484.4) | 43103 (38067, 48121)       | 418.2 (368.9, 472.9) |

|                                   |                         |                      |                         |                      |
|-----------------------------------|-------------------------|----------------------|-------------------------|----------------------|
| <b>Comoros</b>                    | 1620 (1439, 1796)       | 367.8 (324.5, 415.3) | 2892 (2558, 3237)       | 412.2 (365.6, 463.2) |
| <b>Djibouti</b>                   | 1688 (1496, 1880)       | 355 (314.8, 398)     | 4106 (3579, 4641)       | 385.8 (340.9, 431.7) |
| <b>Eritrea</b>                    | 10732 (9523, 11977)     | 401.8 (354.5, 452.1) | 24352 (21593, 27233)    | 436.3 (387.8, 488.5) |
| <b>Ethiopia</b>                   | 178553 (162265, 194581) | 361.8 (329, 392.9)   | 381174 (344670, 417183) | 365.3 (331.7, 398.5) |
| <b>Kenya</b>                      | 97873 (89064, 106543)   | 472.9 (430.5, 515.4) | 215244 (195298, 234671) | 466.4 (423.1, 508)   |
| <b>Madagascar</b>                 | 44895 (39975, 49875)    | 394.8 (350.3, 446.2) | 101051 (89837, 112645)  | 407.3 (362.7, 455.2) |
| <b>Malawi</b>                     | 40519 (36138, 44990)    | 450.5 (400, 506.3)   | 75436 (67017, 83961)    | 462.1 (408.4, 520.2) |
| <b>Mozambique</b>                 | 52352 (47016, 58100)    | 374.6 (335.1, 420.3) | 123525 (109266, 137133) | 429.8 (380.9, 481.8) |
| <b>Rwanda</b>                     | 32027 (28259, 35706)    | 472.8 (415.6, 535.4) | 51251 (44801, 57926)    | 424.2 (371.4, 480.6) |
| <b>Somalia</b>                    | 24442 (21753, 26999)    | 364.4 (323.3, 409.9) | 65334 (58085, 72663)    | 407 (361.4, 455.6)   |
| <b>South Sudan</b>                | 21677 (19113, 24147)    | 381.5 (336.9, 429)   | 39414 (34956, 43928)    | 415.8 (366.9, 468.8) |
| <b>Tanzania</b>                   | 92937 (83082, 103005)   | 380 (338.4, 426.8)   | 205990 (182800, 228913) | 402 (357.3, 450.6)   |
| <b>Uganda</b>                     | 62275 (55685, 69196)    | 386.1 (343.5, 433.8) | 151894 (134271, 169696) | 411.8 (364.6, 462.8) |
| <b>Zambia</b>                     | 32231 (28791, 35927)    | 441.4 (390.2, 498)   | 68281 (60545, 76386)    | 417.3 (369.4, 469)   |
| <b>Central sub-Saharan Africa</b> | 183859 (163692, 204051) | 337 (299.1, 378.1)   | 438288 (389771, 485837) | 360.4 (318.4, 402.2) |
| <b>Angola</b>                     | 35574 (31524, 39728)    | 351.5 (310.5, 392.6) | 99784 (88198, 110654)   | 359.4 (317.9, 400.6) |
| <b>Central African Republic</b>   | 8437 (7489, 9367)       | 311.5 (275.6, 348.6) | 16055 (14175, 17923)    | 337.8 (296.2, 379.2) |
| <b>Congo</b>                      | 7561 (6723, 8419)       | 314 (278.2, 352.1)   | 15481 (13687, 17209)    | 318.5 (281, 356.5)   |
| <b>DR Congo</b>                   | 127868 (113663, 142312) | 337.1 (299.5, 378.2) | 297366 (263706, 329898) | 366.7 (322.2, 408.7) |
| <b>Equatorial Guinea</b>          | 1300 (1154, 1442)       | 312 (275.2, 349.7)   | 4253 (3757, 4761)       | 311.7 (274.3, 348.5) |
| <b>Gabon</b>                      | 3120 (2771, 3468)       | 324.5 (286.3, 363.7) | 5348 (4696, 5940)       | 313.9 (275.6, 350)   |

**Appendix Table 26: Data quality rating from 0 to 5 stars, maximum percentage well-certified per five-year interval and percentage well-certified across time series for 195 countries and territories, 1980–2017**

| Country                | Data quality rating | 1980–1984 | 1985–1989 | 1990–1994 | 1995–1999 | 2000–2004 | 2005–2009 | 2010–2017 | 1980–2017 |
|------------------------|---------------------|-----------|-----------|-----------|-----------|-----------|-----------|-----------|-----------|
| Afghanistan            | 1                   | 0.0       | 0.0       | 0.0       | 0.0       | 4.6       | 38.2      | 0.0       | 6.1       |
| Albania                | 3                   | 0.0       | 66.1      | 68.6      | 70.7      | 71.8      | 72.5      | 54.7      | 57.8      |
| Algeria                | 1                   | 0.0       | 0.0       | 0.0       | 0.0       | 0.0       | 17.3      | 0.0       | 2.5       |
| American Samoa         | 3                   | 0.0       | 0.0       | 0.0       | 73.7      | 78.2      | 83.4      | 79.4      | 45.0      |
| Andorra                | 0                   | 0.0       | 0.0       | 0.0       | 0.0       | 0.0       | 0.0       | 0.0       | 0.0       |
| Angola                 | 1                   | 0.0       | 0.0       | 0.0       | 0.0       | 0.0       | 0.0       | 4.4       | 0.6       |
| Antigua and Barbuda    | 4                   | 60.9      | 72.0      | 75.1      | 79.5      | 79.3      | 80.0      | 74.7      | 74.5      |
| Argentina              | 4                   | 77.4      | 70.9      | 69.7      | 68.5      | 66.7      | 66.6      | 69.9      | 70.0      |
| Armenia                | 5                   | 74.2      | 78.1      | 85.0      | 88.8      | 88.9      | 92.7      | 91.9      | 85.6      |
| Australia              | 5                   | 93.2      | 93.6      | 92.9      | 92.5      | 91.1      | 90.5      | 90.0      | 91.9      |
| Austria                | 5                   | 89.9      | 90.9      | 90.0      | 88.6      | 91.9      | 90.8      | 89.2      | 90.2      |
| Azerbaijan             | 3                   | 75.5      | 75.4      | 78.1      | 72.0      | 68.2      | 41.8      | 0.0       | 58.7      |
| Bahrain                | 3                   | 0.0       | 78.1      | 0.0       | 61.6      | 64.6      | 55.9      | 56.8      | 45.3      |
| Bangladesh             | 1                   | 2.8       | 4.5       | 25.7      | 4.4       | 12.4      | 6.3       | 6.3       | 8.9       |
| Barbados               | 4                   | 75.0      | 75.8      | 77.6      | 77.4      | 75.6      | 82.1      | 82.0      | 77.9      |
| Belarus                | 4                   | 84.0      | 88.9      | 80.1      | 82.9      | 85.4      | 84.5      | 85.0      | 84.4      |
| Belgium                | 4                   | 77.8      | 77.6      | 81.3      | 84.1      | 82.8      | 82.7      | 80.4      | 81.0      |
| Belize                 | 4                   | 47.5      | 52.4      | 49.8      | 76.6      | 78.3      | 87.1      | 89.1      | 68.7      |
| Benin                  | 1                   | 0.0       | 0.6       | 0.0       | 0.0       | 0.0       | 0.0       | 0.0       | 0.1       |
| Bermuda                | 5                   | 90.4      | 88.7      | 90.2      | 93.5      | 91.1      | 86.4      | 90.3      | 90.1      |
| Bhutan                 | 0                   | 0.0       | 0.0       | 0.0       | 0.0       | 0.0       | 0.0       | 0.0       | 0.0       |
| Bolivia                | 1                   | 0.0       | 0.0       | 0.0       | 0.0       | 14.7      | 0.0       | 0.0       | 2.1       |
| Bosnia and Herzegovina | 2                   | 0.0       | 65.8      | 67.1      | 0.0       | 0.0       | 0.0       | 71.4      | 29.2      |
| Botswana               | 0                   | 0.0       | 0.0       | 0.0       | 0.0       | 0.0       | 0.0       | 0.0       | 0.0       |
| Brazil                 | 4                   | 54.0      | 58.9      | 65.2      | 68.9      | 74.6      | 80.7      | 82.5      | 69.3      |
| Brunei                 | 3                   | 0.0       | 0.0       | 0.0       | 66.7      | 73.2      | 76.1      | 74.5      | 41.5      |
| Bulgaria               | 4                   | 81.7      | 82.3      | 79.6      | 76.5      | 71.8      | 73.5      | 70.2      | 76.5      |

|                          |   |      |      |      |      |      |      |      |      |
|--------------------------|---|------|------|------|------|------|------|------|------|
| Burkina Faso             | 1 | 0.2  | 0.0  | 0.0  | 4.6  | 6.3  | 4.6  | 0.3  | 2.3  |
| Burundi                  | 1 | 0.0  | 0.0  | 2.2  | 0.0  | 0.0  | 0.0  | 0.0  | 0.3  |
| Cambodia                 | 1 | 0.0  | 0.0  | 0.0  | 0.0  | 1.6  | 4.4  | 0.0  | 0.9  |
| Cameroon                 | 0 | 0.0  | 0.0  | 0.0  | 0.0  | 0.0  | 0.0  | 0.0  | 0.0  |
| Canada                   | 5 | 89.4 | 90.0 | 89.1 | 88.6 | 89.3 | 89.4 | 90.1 | 89.4 |
| Cape Verde               | 2 | 56.1 | 0.0  | 0.1  | 0.0  | 0.0  | 0.0  | 67.7 | 17.7 |
| Central African Republic | 0 | 0.0  | 0.0  | 0.0  | 0.0  | 0.0  | 0.0  | 0.0  | 0.0  |
| Chad                     | 0 | 0.0  | 0.0  | 0.0  | 0.0  | 0.0  | 0.0  | 0.0  | 0.0  |
| Chile                    | 4 | 75.7 | 75.5 | 81.7 | 84.7 | 90.8 | 90.8 | 89.8 | 84.1 |
| China                    | 3 | 0.0  | 0.9  | 73.8 | 75.1 | 70.3 | 73.0 | 73.5 | 52.4 |
| Colombia                 | 4 | 72.4 | 74.4 | 77.3 | 88.0 | 88.6 | 88.9 | 88.5 | 82.6 |
| Comoros                  | 0 | 0.0  | 0.0  | 0.0  | 0.0  | 0.0  | 0.0  | 0.0  | 0.0  |
| Congo                    | 0 | 0.0  | 0.0  | 0.0  | 0.0  | 0.0  | 0.0  | 0.0  | 0.0  |
| Costa Rica               | 5 | 81.6 | 83.4 | 82.5 | 91.1 | 92.3 | 90.6 | 90.5 | 87.4 |
| Côte d'Ivoire            | 1 | 0.0  | 1.2  | 1.2  | 0.0  | 0.0  | 0.2  | 0.2  | 0.4  |
| Croatia                  | 4 | 0.0  | 84.4 | 85.3 | 82.6 | 86.1 | 88.3 | 92.3 | 74.1 |
| Cuba                     | 5 | 84.7 | 85.1 | 84.9 | 88.9 | 90.2 | 91.0 | 91.5 | 88.0 |
| Cyprus                   | 2 | 0.0  | 0.0  | 0.0  | 26.8 | 53.8 | 59.5 | 60.9 | 28.7 |
| Czech Republic           | 4 | 0.0  | 90.7 | 89.6 | 84.8 | 84.7 | 85.8 | 87.8 | 74.8 |
| DR Congo                 | 1 | 0.0  | 2.3  | 3.0  | 0.0  | 0.0  | 0.0  | 0.0  | 0.8  |
| Denmark                  | 4 | 84.5 | 82.9 | 83.1 | 85.8 | 85.4 | 84.5 | 84.6 | 84.4 |
| Djibouti                 | 0 | 0.0  | 0.0  | 0.0  | 0.0  | 0.0  | 0.0  | 0.0  | 0.0  |
| Dominica                 | 4 | 71.6 | 63.1 | 62.1 | 65.8 | 68.6 | 81.7 | 83.9 | 71.0 |
| Dominican Republic       | 3 | 53.6 | 53.5 | 44.5 | 53.8 | 57.2 | 56.8 | 59.9 | 54.2 |
| Ecuador                  | 4 | 73.0 | 72.4 | 72.9 | 69.8 | 66.4 | 62.9 | 70.4 | 69.7 |
| Egypt                    | 3 | 35.0 | 48.2 | 46.8 | 0.0  | 43.9 | 42.7 | 48.2 | 37.8 |
| El Salvador              | 3 | 73.3 | 0.0  | 60.4 | 67.2 | 69.4 | 70.8 | 67.4 | 58.4 |
| Equatorial Guinea        | 0 | 0.0  | 0.0  | 0.0  | 0.0  | 0.0  | 0.0  | 0.0  | 0.0  |
| Eritrea                  | 0 | 0.0  | 0.0  | 0.0  | 0.0  | 0.0  | 0.0  | 0.0  | 0.0  |
| Estonia                  | 5 | 92.1 | 92.7 | 93.8 | 93.1 | 92.5 | 94.1 | 93.9 | 93.2 |
| Ethiopia                 | 1 | 0.0  | 1.2  | 2.5  | 0.6  | 5.0  | 4.6  | 4.6  | 2.6  |

|                                |   |      |      |      |      |      |      |      |      |
|--------------------------------|---|------|------|------|------|------|------|------|------|
| Federated States of Micronesia | 0 | 0.0  | 0.0  | 0.0  | 0.0  | 0.0  | 0.0  | 0.0  | 0.0  |
| Fiji                           | 2 | 0.0  | 0.0  | 0.0  | 34.8 | 58.0 | 63.9 | 70.0 | 32.4 |
| Finland                        | 5 | 83.7 | 91.7 | 91.7 | 95.8 | 95.6 | 94.9 | 95.9 | 92.8 |
| France                         | 4 | 76.1 | 78.4 | 79.1 | 79.0 | 79.1 | 79.4 | 77.4 | 78.3 |
| Gabon                          | 0 | 0.0  | 0.0  | 0.0  | 0.0  | 0.0  | 0.0  | 0.0  | 0.0  |
| Georgia                        | 4 | 83.4 | 80.7 | 81.3 | 77.7 | 78.7 | 62.2 | 58.9 | 74.7 |
| Germany                        | 4 | 78.4 | 80.5 | 84.1 | 83.9 | 83.5 | 83.8 | 84.0 | 82.6 |
| Ghana                          | 1 | 0.0  | 0.1  | 1.5  | 0.8  | 7.2  | 16.7 | 0.5  | 3.8  |
| Greece                         | 4 | 80.2 | 81.6 | 71.7 | 72.0 | 72.6 | 77.9 | 76.2 | 76.0 |
| Greenland                      | 3 | 0.0  | 0.0  | 0.0  | 90.2 | 89.7 | 89.6 | 87.6 | 51.0 |
| Grenada                        | 4 | 67.7 | 63.4 | 64.0 | 63.2 | 77.0 | 79.9 | 85.9 | 71.6 |
| Guam                           | 3 | 0.0  | 0.0  | 85.9 | 80.7 | 76.7 | 79.9 | 79.2 | 57.5 |
| Guatemala                      | 4 | 80.1 | 75.0 | 73.9 | 72.6 | 73.3 | 75.2 | 78.0 | 75.4 |
| Guinea                         | 1 | 0.0  | 0.0  | 0.0  | 3.2  | 0.0  | 0.0  | 0.0  | 0.5  |
| Guinea-Bissau                  | 1 | 0.0  | 0.0  | 0.1  | 1.2  | 0.0  | 0.0  | 0.0  | 0.2  |
| Guyana                         | 4 | 55.5 | 76.2 | 69.8 | 78.3 | 84.3 | 85.5 | 78.6 | 75.5 |
| Haiti                          | 1 | 22.3 | 1.3  | 1.0  | 13.9 | 6.1  | 0.0  | 0.0  | 6.4  |
| Honduras                       | 2 | 41.2 | 46.0 | 43.2 | 0.0  | 0.0  | 17.5 | 19.1 | 23.8 |
| Hungary                        | 5 | 91.0 | 89.8 | 89.9 | 91.0 | 92.1 | 92.6 | 93.8 | 91.5 |
| Iceland                        | 5 | 92.6 | 93.8 | 94.2 | 94.1 | 93.5 | 92.9 | 91.4 | 93.2 |
| India                          | 2 | 2.8  | 3.0  | 2.9  | 5.2  | 6.3  | 52.7 | 49.0 | 17.4 |
| Indonesia                      | 2 | 1.4  | 0.0  | 1.3  | 0.4  | 0.3  | 53.7 | 62.3 | 17.1 |
| Iran                           | 2 | 0.0  | 0.0  | 0.0  | 0.0  | 52.8 | 63.7 | 80.3 | 28.1 |
| Iraq                           | 2 | 0.0  | 0.0  | 0.0  | 0.0  | 0.0  | 45.8 | 56.7 | 14.6 |
| Ireland                        | 5 | 90.3 | 91.6 | 91.7 | 90.9 | 90.2 | 92.4 | 92.3 | 91.3 |
| Israel                         | 4 | 81.2 | 82.6 | 83.2 | 82.7 | 81.8 | 80.1 | 80.7 | 81.8 |
| Italy                          | 5 | 88.8 | 88.4 | 88.5 | 87.8 | 88.1 | 88.7 | 88.3 | 88.4 |
| Jamaica                        | 4 | 70.5 | 72.8 | 64.6 | 0.0  | 83.0 | 87.5 | 89.1 | 66.8 |
| Japan                          | 4 | 82.6 | 81.0 | 81.5 | 87.6 | 85.7 | 84.4 | 81.3 | 83.4 |
| Jordan                         | 2 | 0.0  | 0.0  | 0.0  | 1.9  | 70.1 | 76.5 | 74.1 | 31.8 |
| Kazakhstan                     | 5 | 80.0 | 84.9 | 89.1 | 88.6 | 85.0 | 84.2 | 84.1 | 85.1 |



|                  |   |      |      |      |      |      |      |      |      |
|------------------|---|------|------|------|------|------|------|------|------|
| Kenya            | 1 | 0.0  | 2.7  | 0.0  | 0.4  | 4.9  | 5.4  | 0.8  | 2.0  |
| Kiribati         | 2 | 0.0  | 0.0  | 47.9 | 66.6 | 35.6 | 0.0  | 0.0  | 21.4 |
| Kuwait           | 4 | 82.1 | 81.9 | 76.4 | 77.5 | 83.1 | 84.9 | 84.6 | 81.5 |
| Kyrgyzstan       | 4 | 67.5 | 75.9 | 72.5 | 74.4 | 87.4 | 92.9 | 93.2 | 80.6 |
| Laos             | 1 | 0.0  | 1.3  | 0.0  | 0.0  | 0.0  | 0.0  | 0.0  | 0.2  |
| Latvia           | 5 | 92.5 | 92.7 | 89.3 | 92.0 | 91.1 | 88.7 | 94.3 | 91.5 |
| Lebanon          | 1 | 0.0  | 3.5  | 0.0  | 0.0  | 0.0  | 0.0  | 0.0  | 0.5  |
| Lesotho          | 0 | 0.0  | 0.0  | 0.0  | 0.0  | 0.0  | 0.0  | 0.0  | 0.0  |
| Liberia          | 1 | 2.1  | 2.1  | 3.2  | 0.0  | 0.0  | 0.0  | 0.0  | 1.1  |
| Libya            | 1 | 0.0  | 0.0  | 0.0  | 0.0  | 0.0  | 12.6 | 0.0  | 1.8  |
| Lithuania        | 5 | 90.1 | 94.0 | 93.7 | 94.8 | 92.9 | 93.3 | 94.6 | 93.3 |
| Luxembourg       | 4 | 86.4 | 85.8 | 85.5 | 84.5 | 80.6 | 77.9 | 82.5 | 83.3 |
| Macedonia        | 3 | 0.0  | 0.0  | 82.5 | 83.8 | 84.5 | 81.7 | 79.6 | 58.9 |
| Madagascar       | 1 | 2.8  | 3.5  | 2.4  | 2.4  | 0.0  | 0.0  | 0.0  | 1.6  |
| Malawi           | 1 | 0.0  | 2.5  | 0.0  | 0.6  | 2.5  | 4.5  | 0.6  | 1.5  |
| Malaysia         | 2 | 46.9 | 0.0  | 0.0  | 32.1 | 37.3 | 42.0 | 40.2 | 28.4 |
| Maldives         | 2 | 0.0  | 0.0  | 0.0  | 0.0  | 44.0 | 46.6 | 60.1 | 21.5 |
| Mali             | 1 | 4.0  | 0.0  | 0.1  | 0.0  | 0.0  | 0.0  | 0.0  | 0.6  |
| Malta            | 5 | 81.2 | 86.3 | 88.7 | 90.0 | 90.3 | 92.8 | 89.5 | 88.4 |
| Marshall Islands | 0 | 0.0  | 0.0  | 0.0  | 0.0  | 0.0  | 0.0  | 0.0  | 0.0  |
| Mauritania       | 0 | 0.0  | 0.0  | 0.0  | 0.0  | 0.0  | 0.0  | 0.0  | 0.0  |
| Mauritius        | 4 | 75.2 | 79.4 | 78.7 | 78.2 | 83.2 | 85.1 | 86.3 | 80.9 |
| Mexico           | 4 | 68.3 | 77.7 | 78.5 | 79.7 | 82.4 | 84.1 | 88.1 | 79.8 |
| Moldova          | 5 | 88.8 | 91.2 | 81.9 | 87.8 | 85.0 | 83.5 | 83.7 | 86.0 |
| Mongolia         | 2 | 0.0  | 0.0  | 61.2 | 0.0  | 19.6 | 21.4 | 83.4 | 26.5 |
| Montenegro       | 2 | 0.0  | 0.0  | 0.0  | 0.0  | 69.2 | 69.2 | 0.0  | 19.8 |
| Morocco          | 2 | 0.0  | 15.4 | 0.0  | 0.0  | 10.2 | 33.3 | 13.7 | 10.4 |
| Mozambique       | 2 | 0.0  | 0.0  | 0.0  | 0.1  | 16.2 | 63.4 | 0.0  | 11.4 |
| Myanmar          | 1 | 0.0  | 0.0  | 0.0  | 0.0  | 0.0  | 2.9  | 49.5 | 7.5  |
| Namibia          | 0 | 0.0  | 0.0  | 0.0  | 0.0  | 0.0  | 0.0  | 0.0  | 0.0  |
| Nepal            | 1 | 2.8  | 2.6  | 0.0  | 0.6  | 0.6  | 9.2  | 0.0  | 2.3  |

|                                  |   |      |      |      |      |      |      |      |      |
|----------------------------------|---|------|------|------|------|------|------|------|------|
| Netherlands                      | 4 | 88.5 | 86.7 | 85.2 | 83.9 | 82.3 | 83.2 | 83.3 | 84.7 |
| New Zealand                      | 5 | 95.3 | 95.2 | 95.1 | 96.8 | 96.4 | 96.3 | 95.7 | 95.8 |
| Nicaragua                        | 3 | 0.0  | 54.3 | 56.9 | 69.0 | 77.2 | 84.9 | 90.5 | 61.8 |
| Niger                            | 1 | 0.0  | 0.0  | 0.0  | 0.0  | 0.0  | 35.7 | 0.0  | 5.1  |
| Nigeria                          | 1 | 0.0  | 0.0  | 3.3  | 0.0  | 0.0  | 0.1  | 32.3 | 5.1  |
| North Korea                      | 0 | 0.0  | 0.0  | 0.0  | 0.0  | 0.0  | 0.0  | 0.0  | 0.0  |
| Northern Mariana Islands         | 3 | 0.0  | 0.0  | 0.0  | 75.3 | 71.4 | 80.3 | 82.5 | 44.2 |
| Norway                           | 5 | 88.6 | 89.4 | 88.6 | 88.5 | 86.3 | 84.2 | 84.1 | 87.1 |
| Oman                             | 2 | 0.0  | 0.0  | 0.0  | 0.0  | 0.0  | 73.2 | 34.4 | 15.4 |
| Pakistan                         | 1 | 0.0  | 2.8  | 1.6  | 0.0  | 1.5  | 17.8 | 1.9  | 3.7  |
| Palestine                        | 2 | 0.0  | 0.0  | 0.0  | 29.7 | 32.2 | 34.2 | 74.1 | 24.3 |
| Panama                           | 4 | 72.3 | 75.3 | 0.0  | 83.5 | 86.6 | 86.3 | 84.0 | 69.7 |
| Papua New Guinea                 | 1 | 9.4  | 3.4  | 0.0  | 0.0  | 0.0  | 0.0  | 28.8 | 6.0  |
| Paraguay                         | 3 | 51.3 | 51.2 | 57.2 | 62.7 | 63.6 | 68.8 | 74.0 | 61.3 |
| Peru                             | 3 | 54.9 | 36.1 | 37.2 | 51.1 | 63.3 | 65.4 | 65.9 | 53.4 |
| Philippines                      | 4 | 68.2 | 71.1 | 65.9 | 68.6 | 74.3 | 74.1 | 74.8 | 71.0 |
| Poland                           | 4 | 61.8 | 59.5 | 59.9 | 71.6 | 73.7 | 73.5 | 72.6 | 67.5 |
| Portugal                         | 4 | 76.9 | 77.1 | 76.3 | 76.2 | 79.1 | 77.7 | 80.1 | 77.6 |
| Puerto Rico                      | 4 | 78.6 | 76.7 | 83.9 | 83.2 | 83.6 | 83.6 | 84.4 | 82.0 |
| Qatar                            | 3 | 14.7 | 18.9 | 0.0  | 55.1 | 56.3 | 64.9 | 46.1 | 36.6 |
| Romania                          | 4 | 76.0 | 78.0 | 83.3 | 84.8 | 85.9 | 86.2 | 85.4 | 82.8 |
| Russia                           | 5 | 93.0 | 87.3 | 90.7 | 87.6 | 88.0 | 89.3 | 88.8 | 89.3 |
| Rwanda                           | 1 | 0.0  | 0.0  | 0.0  | 0.0  | 0.0  | 22.6 | 0.0  | 3.2  |
| Saint Lucia                      | 4 | 66.8 | 68.2 | 73.2 | 72.1 | 80.0 | 79.0 | 85.6 | 75.0 |
| Saint Vincent and the Grenadines | 4 | 72.3 | 63.4 | 61.2 | 85.3 | 85.1 | 87.6 | 87.3 | 77.5 |
| Samoa                            | 0 | 0.0  | 0.0  | 0.0  | 0.0  | 0.0  | 0.0  | 0.0  | 0.0  |
| São Tomé and Príncipe            | 1 | 0.0  | 69.6 | 0.0  | 0.0  | 0.0  | 0.0  | 0.0  | 9.9  |
| Saudi Arabia                     | 2 | 0.0  | 0.0  | 0.0  | 23.1 | 27.5 | 29.4 | 28.8 | 15.5 |
| Senegal                          | 1 | 2.0  | 2.5  | 2.6  | 2.5  | 0.0  | 0.0  | 0.0  | 1.4  |
| Serbia                           | 3 | 0.0  | 0.0  | 0.0  | 66.7 | 70.8 | 74.9 | 69.6 | 40.3 |
| Seychelles                       | 3 | 74.4 | 71.5 | 0.0  | 0.0  | 75.9 | 76.9 | 78.1 | 53.8 |

|                            |   |      |      |      |      |      |      |      |      |
|----------------------------|---|------|------|------|------|------|------|------|------|
| Sierra Leone               | 1 | 0.0  | 0.0  | 3.4  | 0.0  | 0.0  | 0.0  | 0.0  | 0.5  |
| Singapore                  | 5 | 91.2 | 92.0 | 94.6 | 95.1 | 95.3 | 94.9 | 95.7 | 94.1 |
| Slovakia                   | 3 | 0.0  | 0.0  | 82.7 | 81.9 | 84.9 | 90.2 | 92.9 | 61.8 |
| Slovenia                   | 4 | 0.0  | 91.6 | 92.5 | 91.8 | 89.3 | 88.3 | 88.5 | 77.4 |
| Solomon Islands            | 1 | 0.0  | 0.0  | 0.0  | 0.0  | 0.0  | 0.0  | 34.6 | 4.9  |
| Somalia                    | 0 | 0.0  | 0.0  | 0.0  | 0.0  | 0.0  | 0.0  | 0.0  | 0.0  |
| South Africa               | 3 | 0.0  | 0.0  | 1.0  | 67.8 | 72.0 | 72.3 | 70.7 | 40.5 |
| South Korea                | 4 | 0.0  | 57.8 | 74.2 | 75.4 | 84.5 | 82.2 | 81.9 | 65.1 |
| South Sudan                | 0 | 0.0  | 0.0  | 0.0  | 0.0  | 0.0  | 0.0  | 0.0  | 0.0  |
| Spain                      | 4 | 77.3 | 79.4 | 82.6 | 83.8 | 83.1 | 84.0 | 84.8 | 82.1 |
| Sri Lanka                  | 3 | 52.0 | 50.2 | 47.7 | 55.4 | 63.7 | 67.4 | 64.8 | 57.3 |
| Sudan                      | 0 | 0.0  | 0.0  | 0.0  | 0.0  | 0.0  | 0.0  | 0.0  | 0.0  |
| Suriname                   | 4 | 60.0 | 63.7 | 61.2 | 66.4 | 74.3 | 73.3 | 73.9 | 67.5 |
| Swaziland                  | 1 | 0.0  | 0.0  | 0.0  | 0.0  | 0.0  | 0.0  | 0.0  | 0.0  |
| Sweden                     | 5 | 87.4 | 88.6 | 88.2 | 87.1 | 85.7 | 85.9 | 84.8 | 86.8 |
| Switzerland                | 4 | 73.8 | 74.2 | 73.4 | 84.6 | 84.4 | 86.7 | 86.1 | 80.5 |
| Syria                      | 3 | 29.5 | 13.2 | 0.0  | 54.3 | 66.7 | 74.4 | 59.8 | 42.5 |
| Taiwan (province of China) | 4 | 84.3 | 82.4 | 79.2 | 83.4 | 84.4 | 84.8 | 83.7 | 83.2 |
| Tajikistan                 | 3 | 74.9 | 71.4 | 71.6 | 58.5 | 51.4 | 50.6 | 50.7 | 61.3 |
| Tanzania                   | 1 | 0.0  | 2.8  | 1.8  | 2.1  | 6.3  | 2.5  | 0.0  | 2.2  |
| Thailand                   | 3 | 29.9 | 28.3 | 35.9 | 62.6 | 52.0 | 61.6 | 62.3 | 47.5 |
| The Bahamas                | 4 | 76.2 | 82.6 | 83.0 | 89.8 | 87.7 | 86.7 | 86.3 | 84.6 |
| The Gambia                 | 1 | 2.8  | 2.2  | 2.1  | 0.9  | 0.7  | 1.0  | 0.0  | 1.4  |
| Timor-Leste                | 0 | 0.0  | 0.0  | 0.0  | 0.0  | 0.0  | 0.0  | 0.0  | 0.0  |
| Togo                       | 0 | 0.0  | 0.0  | 0.0  | 0.0  | 0.0  | 0.0  | 0.0  | 0.0  |
| Tonga                      | 1 | 0.0  | 0.0  | 0.0  | 0.0  | 53.6 | 0.0  | 0.0  | 7.7  |
| Trinidad and Tobago        | 5 | 79.2 | 83.4 | 85.5 | 89.5 | 90.7 | 89.6 | 90.1 | 86.9 |
| Tunisia                    | 1 | 0.0  | 0.0  | 0.0  | 0.0  | 0.0  | 28.9 | 24.8 | 7.7  |
| Turkey                     | 3 | 16.8 | 19.6 | 20.7 | 24.0 | 59.7 | 70.3 | 83.9 | 42.2 |
| Turkmenistan               | 4 | 88.4 | 88.1 | 83.0 | 80.9 | 85.1 | 81.0 | 83.4 | 84.3 |
| Uganda                     | 1 | 0.0  | 0.0  | 0.0  | 0.0  | 0.0  | 2.7  | 0.0  | 0.4  |

|                      |   |      |      |      |      |      |      |      |      |
|----------------------|---|------|------|------|------|------|------|------|------|
| Ukraine              | 5 | 87.4 | 90.0 | 83.5 | 86.0 | 86.4 | 90.9 | 92.2 | 88.1 |
| United Arab Emirates | 1 | 0.0  | 0.0  | 0.0  | 0.0  | 0.0  | 41.5 | 0.0  | 5.9  |
| United Kingdom       | 5 | 94.2 | 94.1 | 94.1 | 92.0 | 91.4 | 91.5 | 92.4 | 92.8 |
| USA                  | 5 | 88.5 | 88.1 | 88.7 | 88.1 | 88.0 | 87.2 | 86.7 | 87.9 |
| Uruguay              | 4 | 77.3 | 76.0 | 79.1 | 79.1 | 79.6 | 78.5 | 77.5 | 78.1 |
| Uzbekistan           | 4 | 83.1 | 86.3 | 85.0 | 79.0 | 68.3 | 72.2 | 79.8 | 79.1 |
| Vanuatu              | 0 | 0.0  | 0.0  | 0.0  | 0.0  | 0.0  | 0.0  | 0.0  | 0.0  |
| Venezuela            | 5 | 81.3 | 75.2 | 83.3 | 87.8 | 89.8 | 89.5 | 88.9 | 85.1 |
| Vietnam              | 1 | 0.0  | 0.7  | 0.2  | 1.3  | 0.9  | 62.0 | 4.8  | 10.0 |
| Virgin Islands       | 4 | 82.0 | 0.0  | 90.6 | 90.5 | 84.1 | 81.9 | 74.0 | 71.8 |
| Yemen                | 0 | 0.0  | 0.0  | 0.0  | 0.0  | 0.0  | 0.0  | 0.0  | 0.0  |
| Zambia               | 1 | 0.0  | 0.0  | 0.0  | 0.0  | 0.0  | 6.3  | 9.5  | 2.3  |
| Zimbabwe             | 2 | 0.0  | 0.0  | 45.3 | 74.2 | 0.0  | 45.3 | 0.0  | 23.5 |

The value of 0 shows lowest quality and 5 denotes highest quality. The percentage of well-certified sources were the proportion of cause of death data that did not have garbage codes at Levels 1 and 2.

**Appendix Table 27: Parent cirrhosis CODEm model covariate table**

| <b>Covariate name</b>                     | <b>Level</b> | <b>Direction</b> |
|-------------------------------------------|--------------|------------------|
| Alcohol (litres per capita)               | 1            | 1                |
| Schistosomiasis prevalence                | 1            | 1                |
| Hepatitis B prevalence                    | 1            | 1                |
| Hepatitis C prevalence                    | 1            | 1                |
| Hepatitis B3 vaccine (proportion covered) | 1            | -1               |
| Diabetes prevalence                       | 2            | 1                |
| BMI (mean)                                | 2            | 1                |
| Healthcare Access and Quality Index       | 2            | -1               |
| Education (years per capita)              | 3            | -1               |
| Health System Access                      | 3            | -1               |
| LDI (per capita)                          | 3            | -1               |
| Socio-demographic Index                   | 3            | -1               |

BMI=body mass index. LDI=labor-distributed income. CODEm=cause of death ensemble model

**Appendix Figure 1: Trends in age-standardised death rates from 1990 to 2017 for both sexes across seven super-regions**

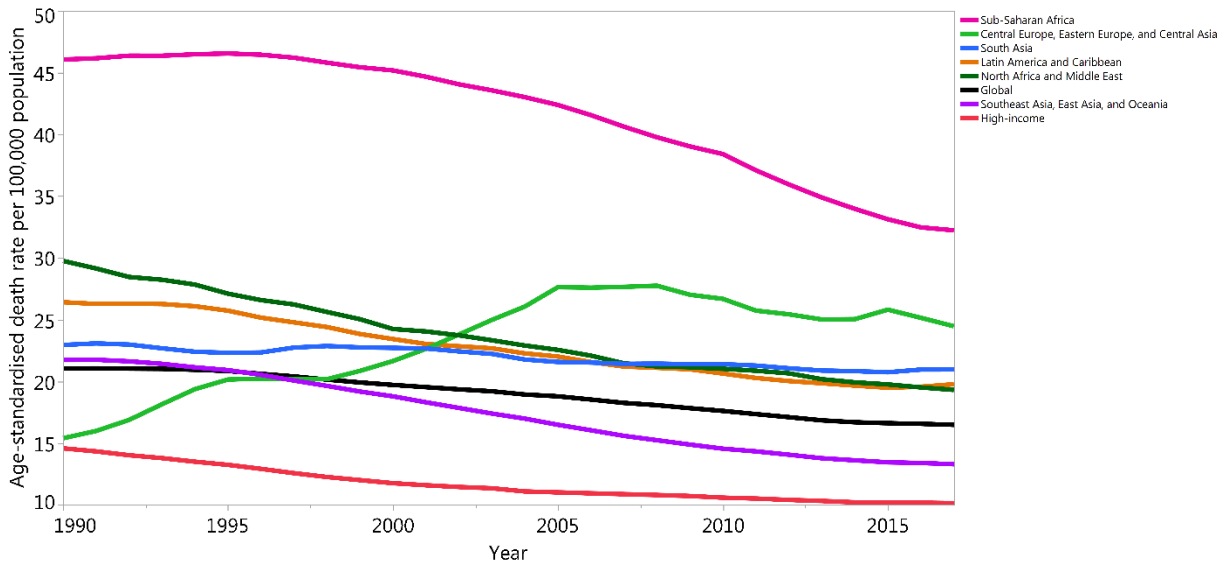

**Appendix Figure 2: The trend of age-standardised death rate of cirrhosis due to hepatitis B across regions from 1990 to 2017, versus the levels of SDI. The black line represents expected rates based solely on SDI. For each region, points from left to right depict estimates for each year from 1990 to 2017. SDI=Socio-demographic Index.**

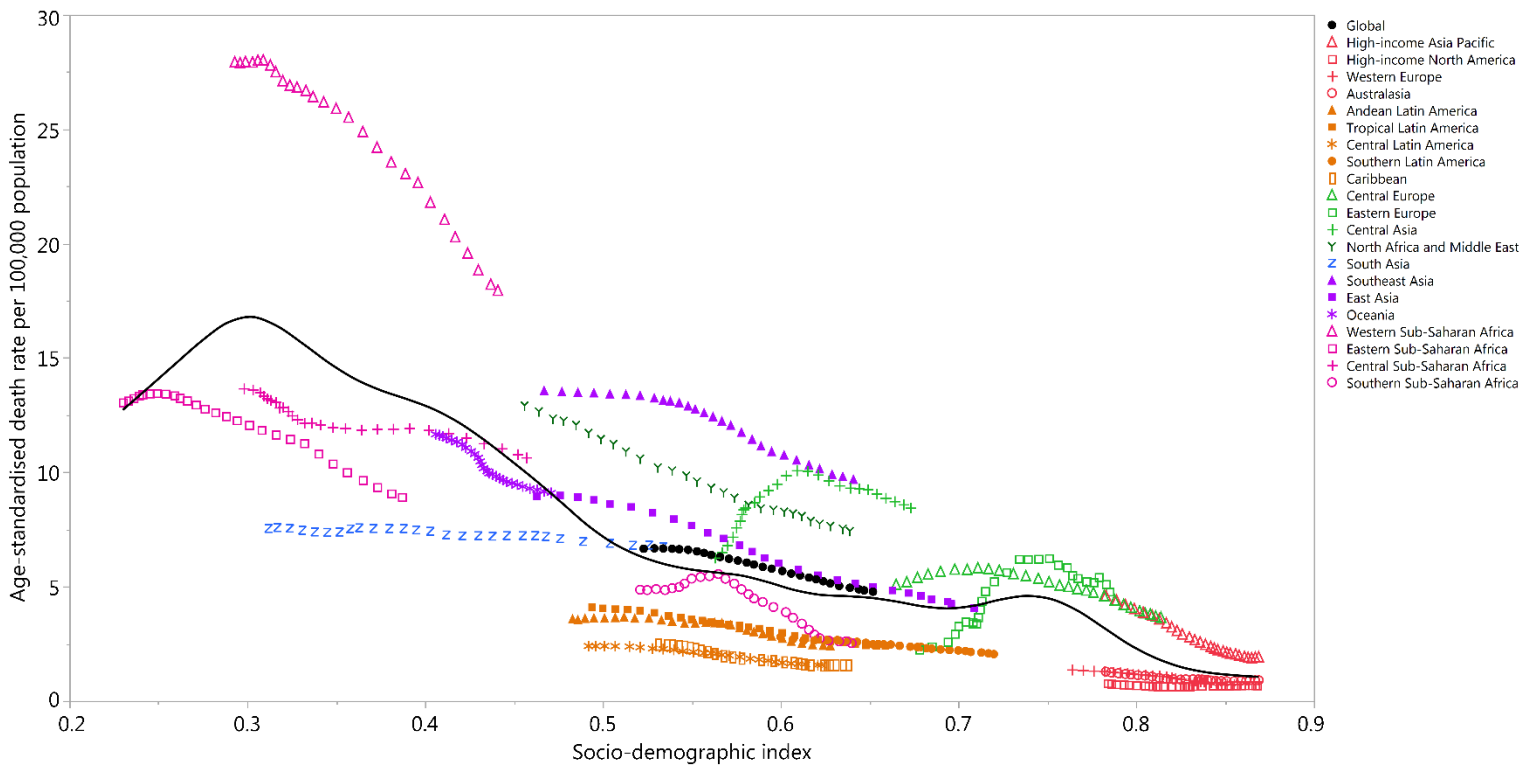

**Appendix Figure 3: The trend of age-standardised death rate of cirrhosis due to hepatitis C across regions from 1990 to 2017, versus the levels of SDI.** The black line represents expected rates based solely on SDI. For each region, points from left to right depict estimates for each year from 1990 to 2017. SDI=Socio-demographic Index.

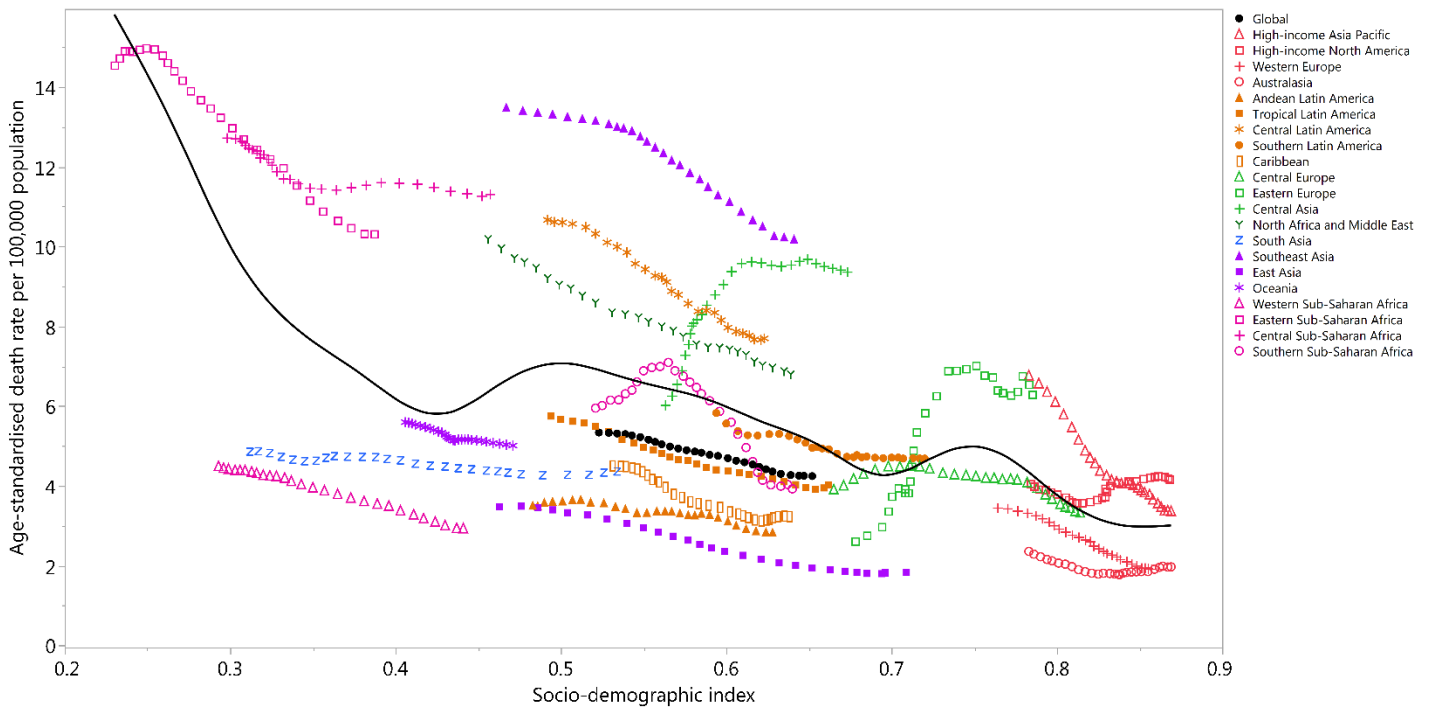

**Appendix Figure 4: The trend of age-standardised death rate of cirrhosis due to alcohol-related liver disease across regions from 1990 to 2017, versus the levels of SDI.** The black line represents expected rates based solely on SDI. For each region, points from left to right depict estimates for each year from 1990 to 2017. SDI=Socio-demographic Index.

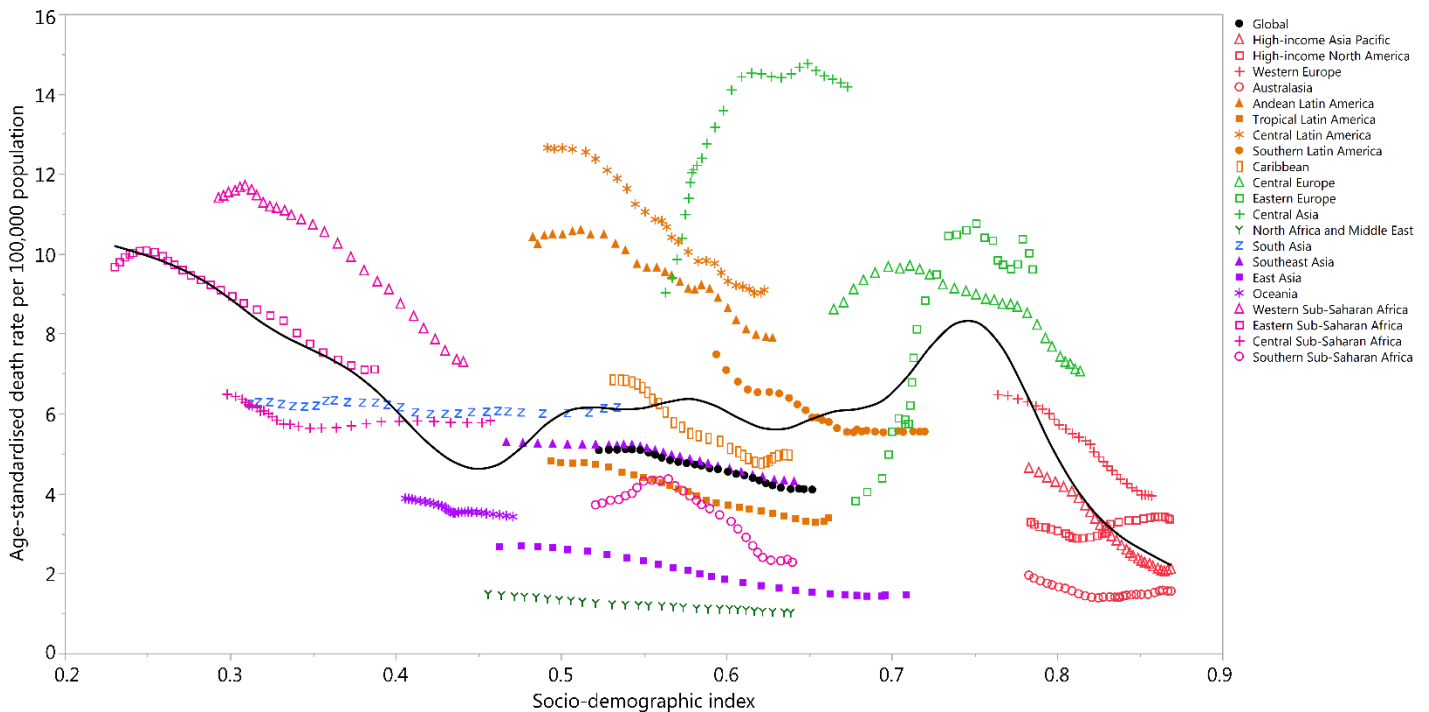

**Appendix Figure 5: The trend of age-standardised death rate of cirrhosis due to NASH across regions from 1990 to 2017, versus the levels of SDI.** The black line represents expected rates based solely on SDI. For each region, points from left to right depict estimates for each year from 1990 to 2017. NASH=non-alcoholic steatohepatitis. SDI=Socio-demographic Index.

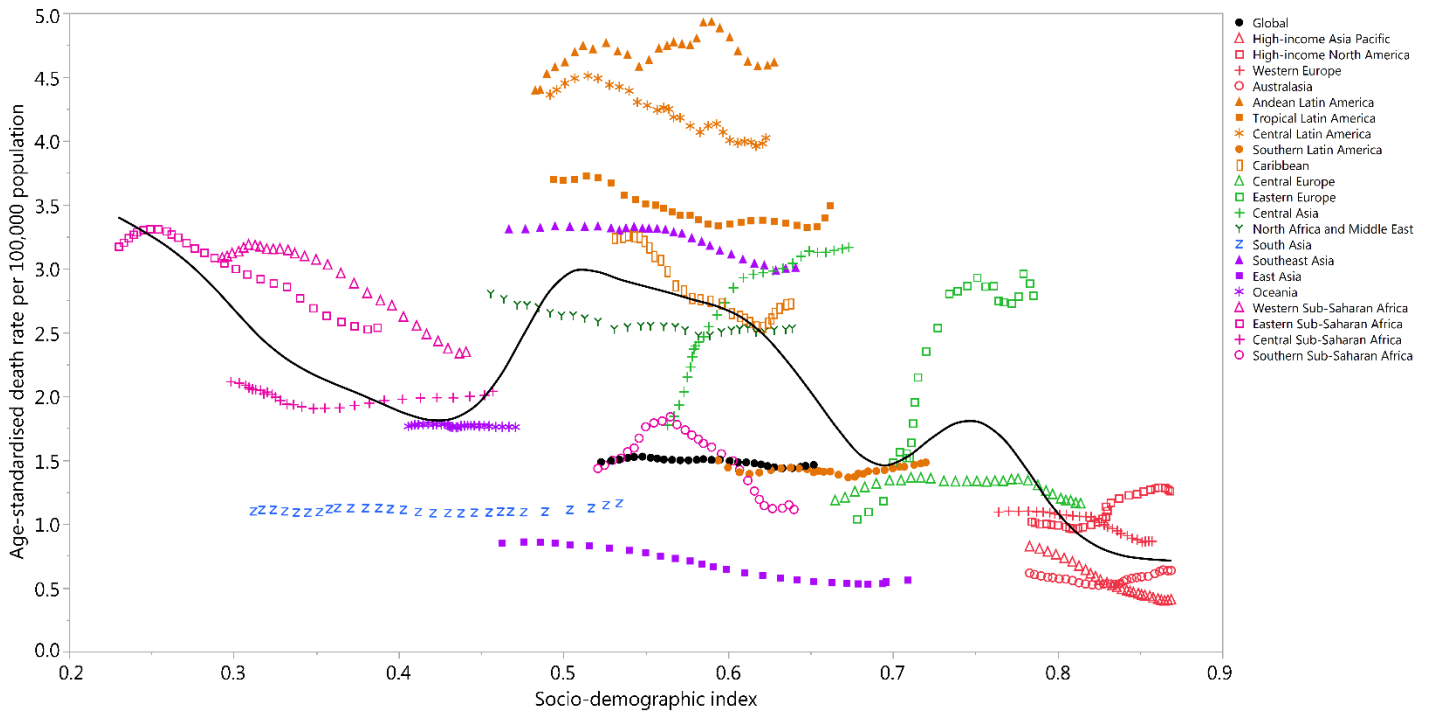

**Appendix Figure 6: The trend of age-standardised death rate of cirrhosis due to other causes across regions from 1990 to 2017, versus the levels of SDI.** The black line represents expected rates based solely on SDI. For each region, points from left to right depict estimates for each year from 1990 to 2017. SDI=Socio-demographic Index.

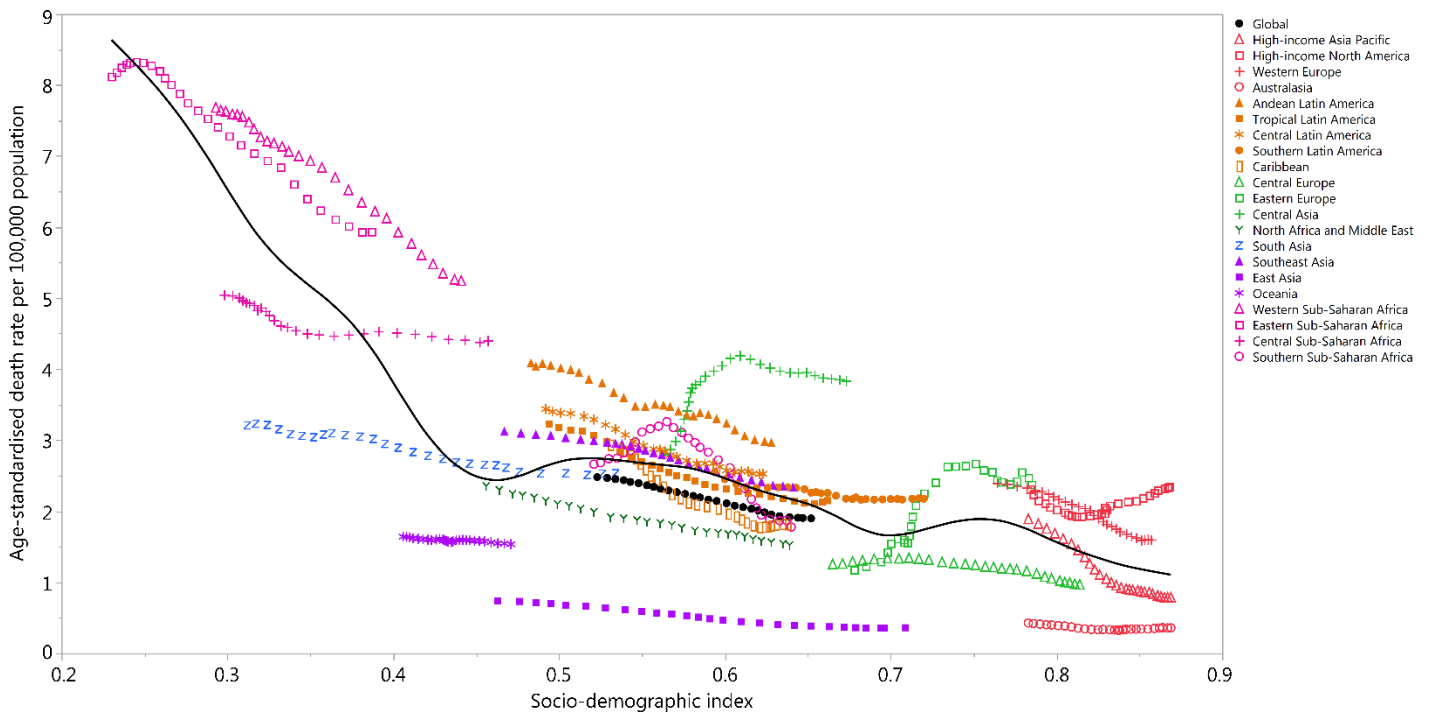



**Appendix Figure 7: The counts and age-standardised rates of mortality by cause across age groups in 2017**

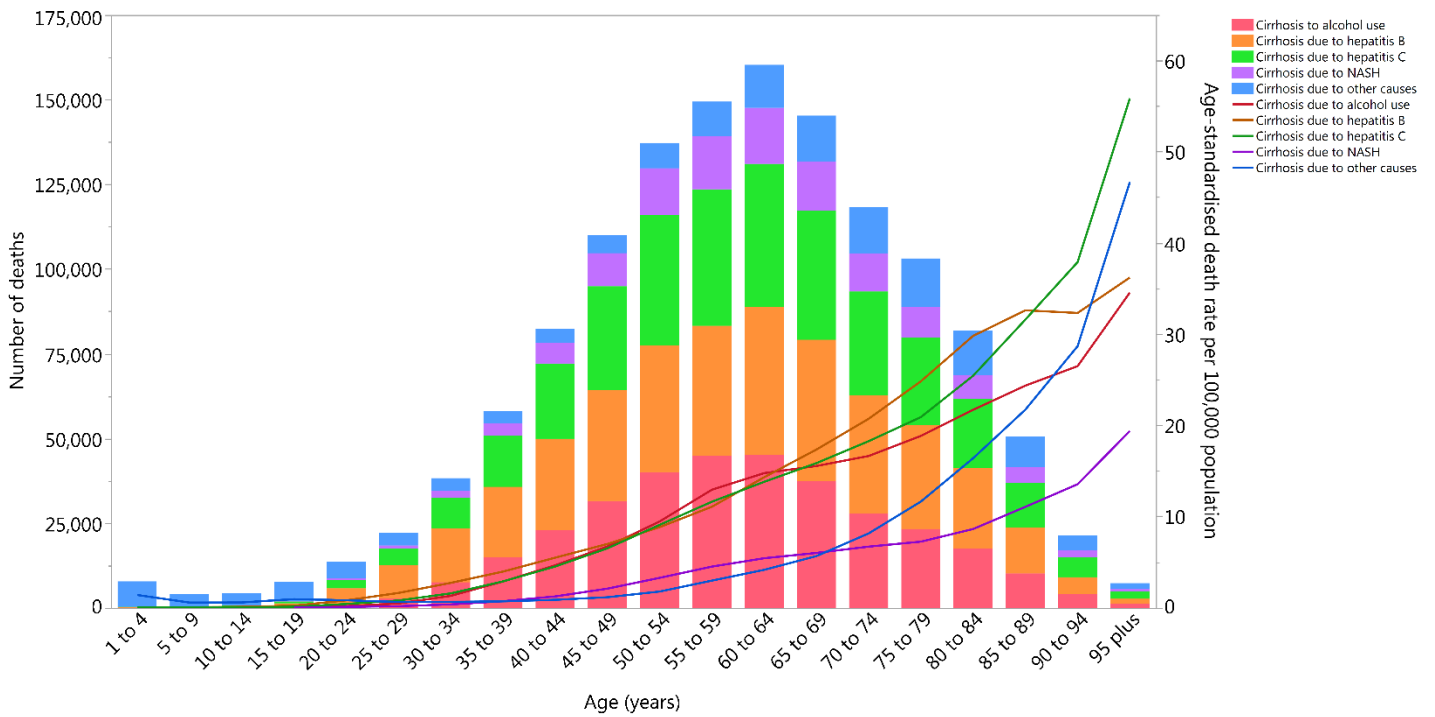

**Appendix Figure 8: The proportion of YLLs and YLDs out of DALYs by age in 2017. YLLs=years of life lost due to premature death. YLDs=years of life lost due to disability. DALYs=disability-adjusted life-years.**

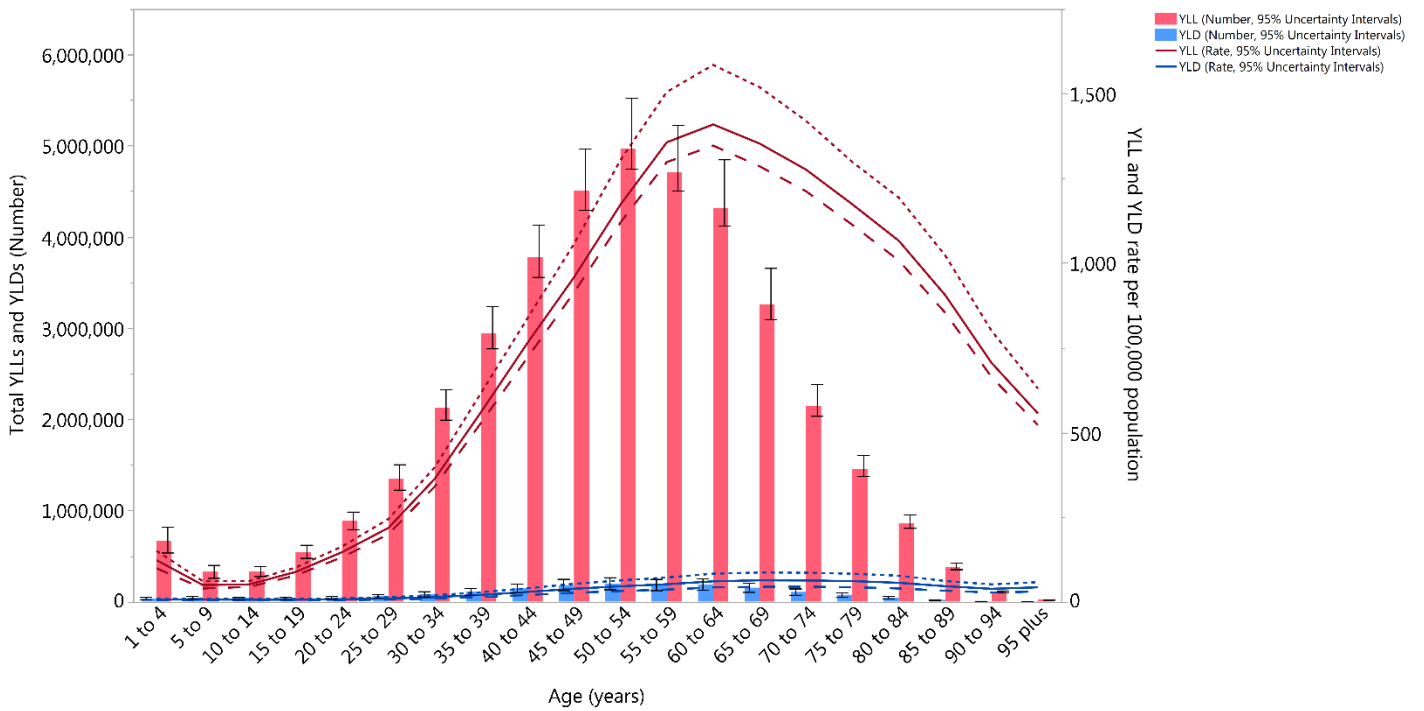

Appendix Figure 9: The age pattern of numbers and rates of death at regional level in 1990, 2000, 2010, and 2017.

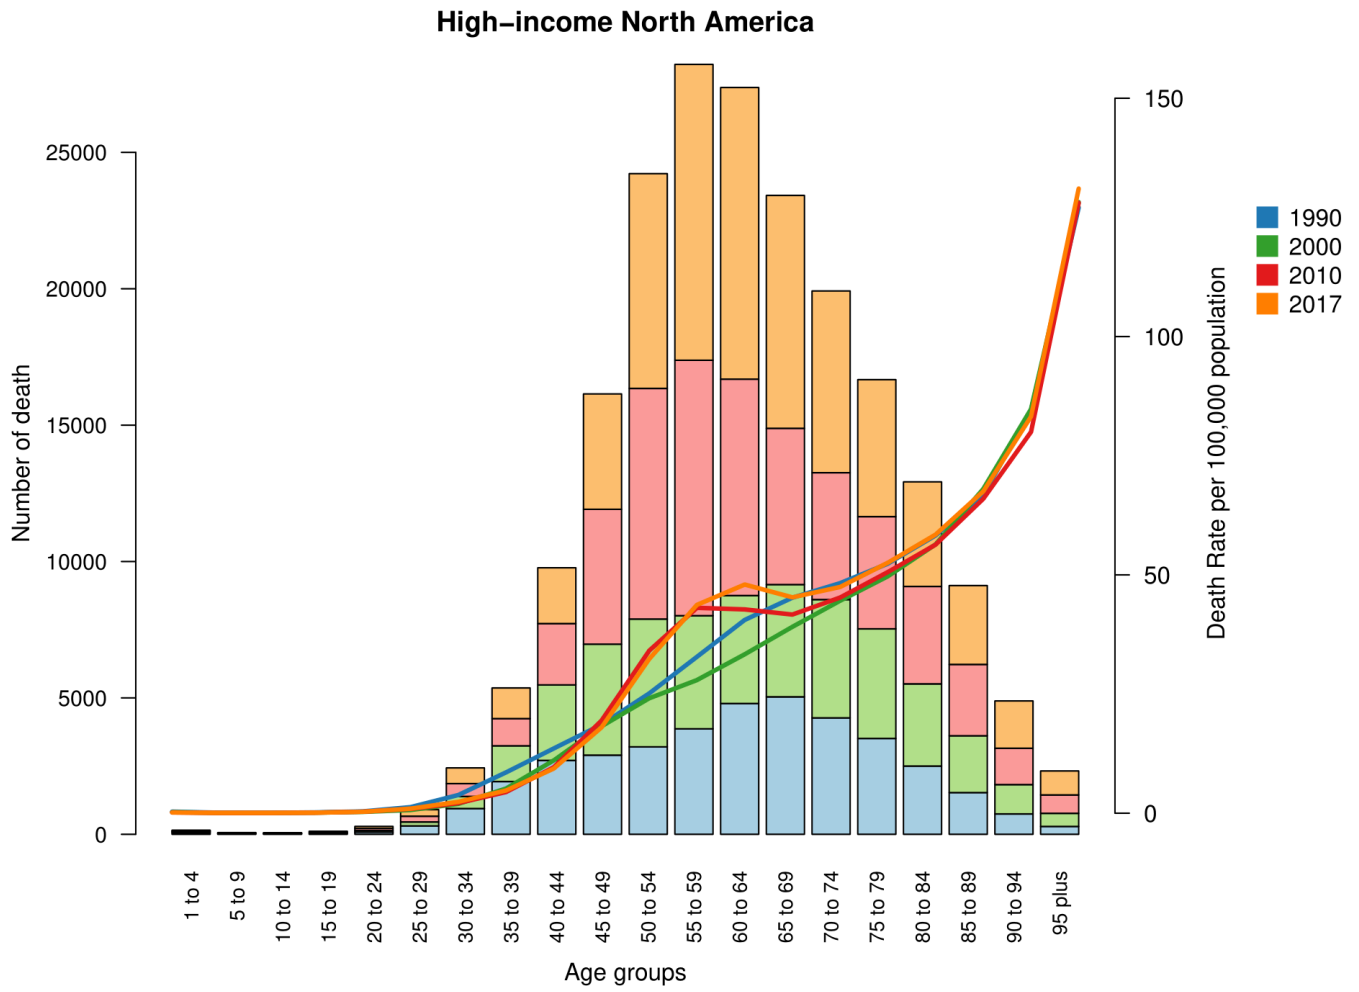

### Australasia

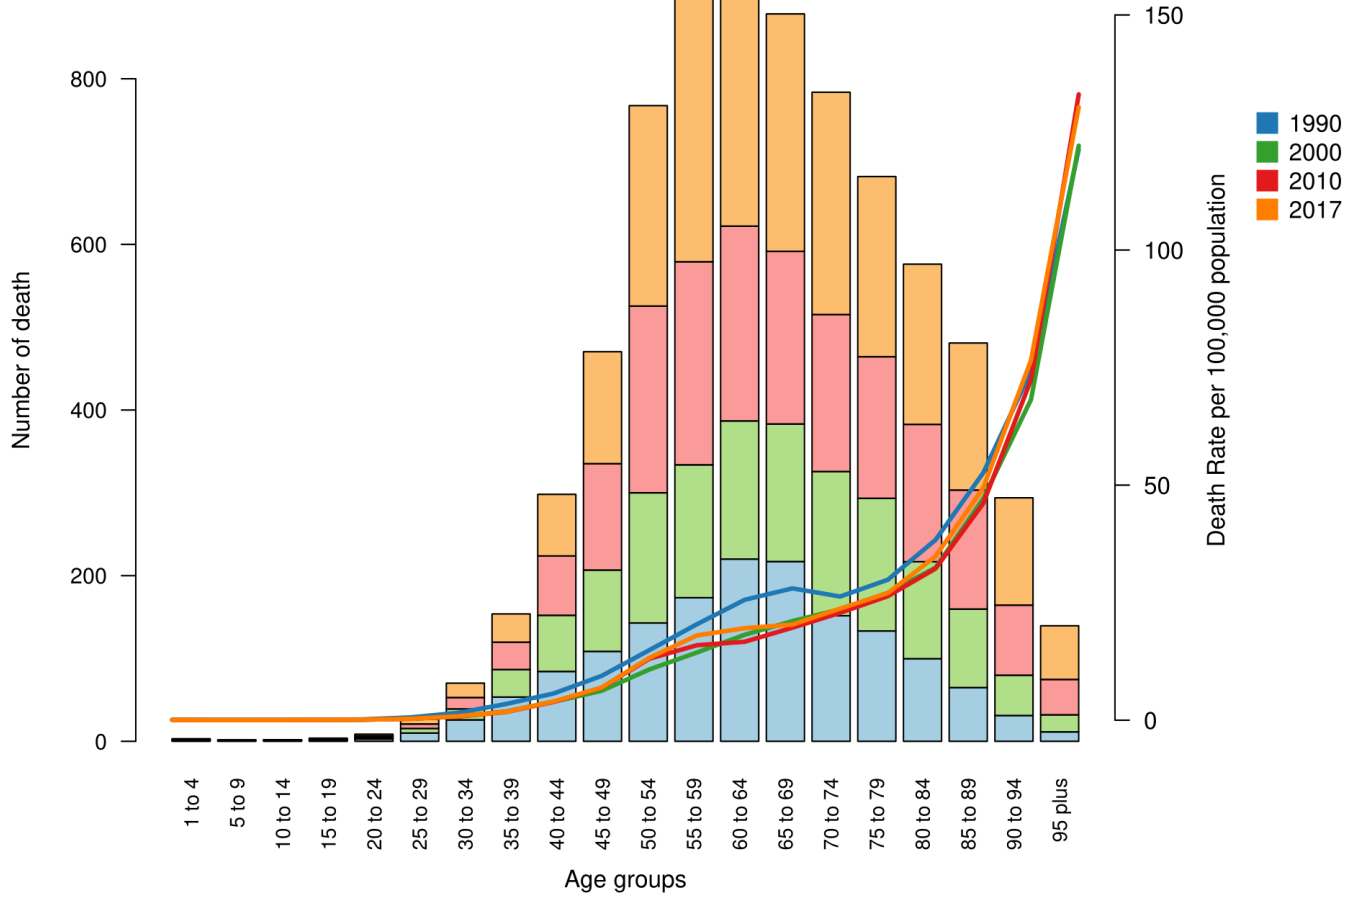

### High-income Asia Pacific

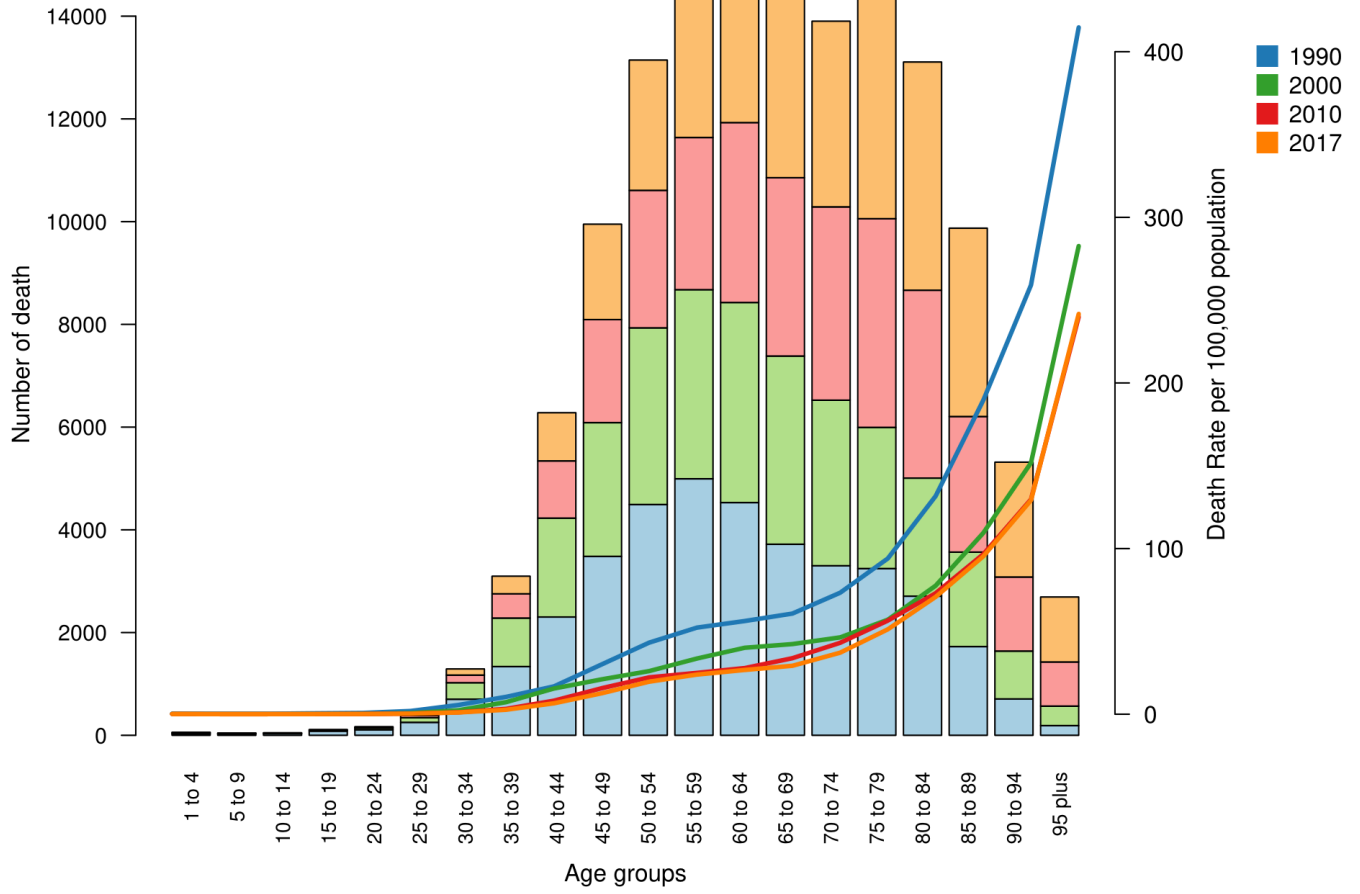

### Western Europe

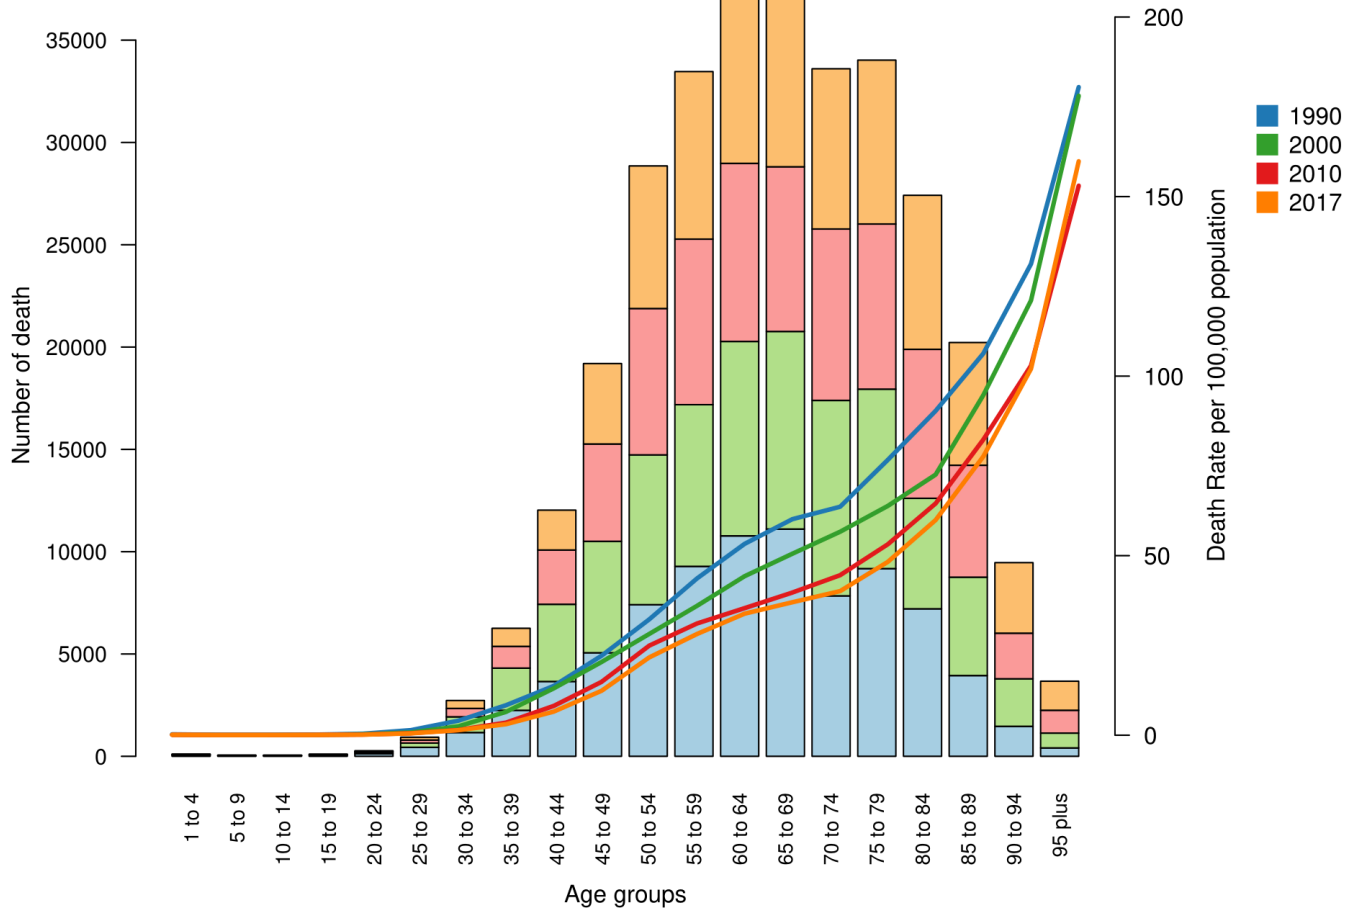

### Central Europe

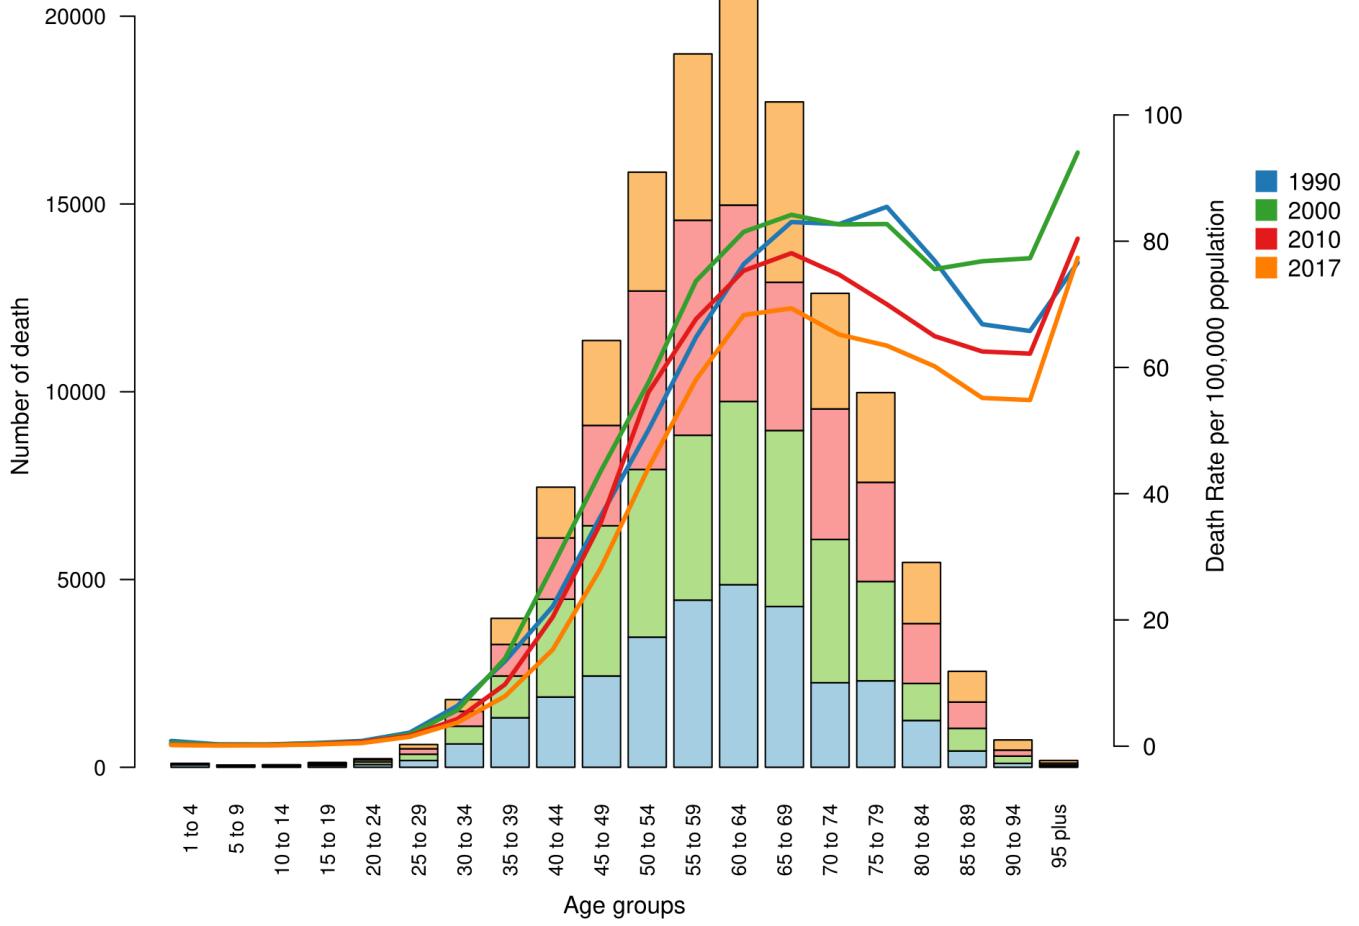

### Eastern Europe

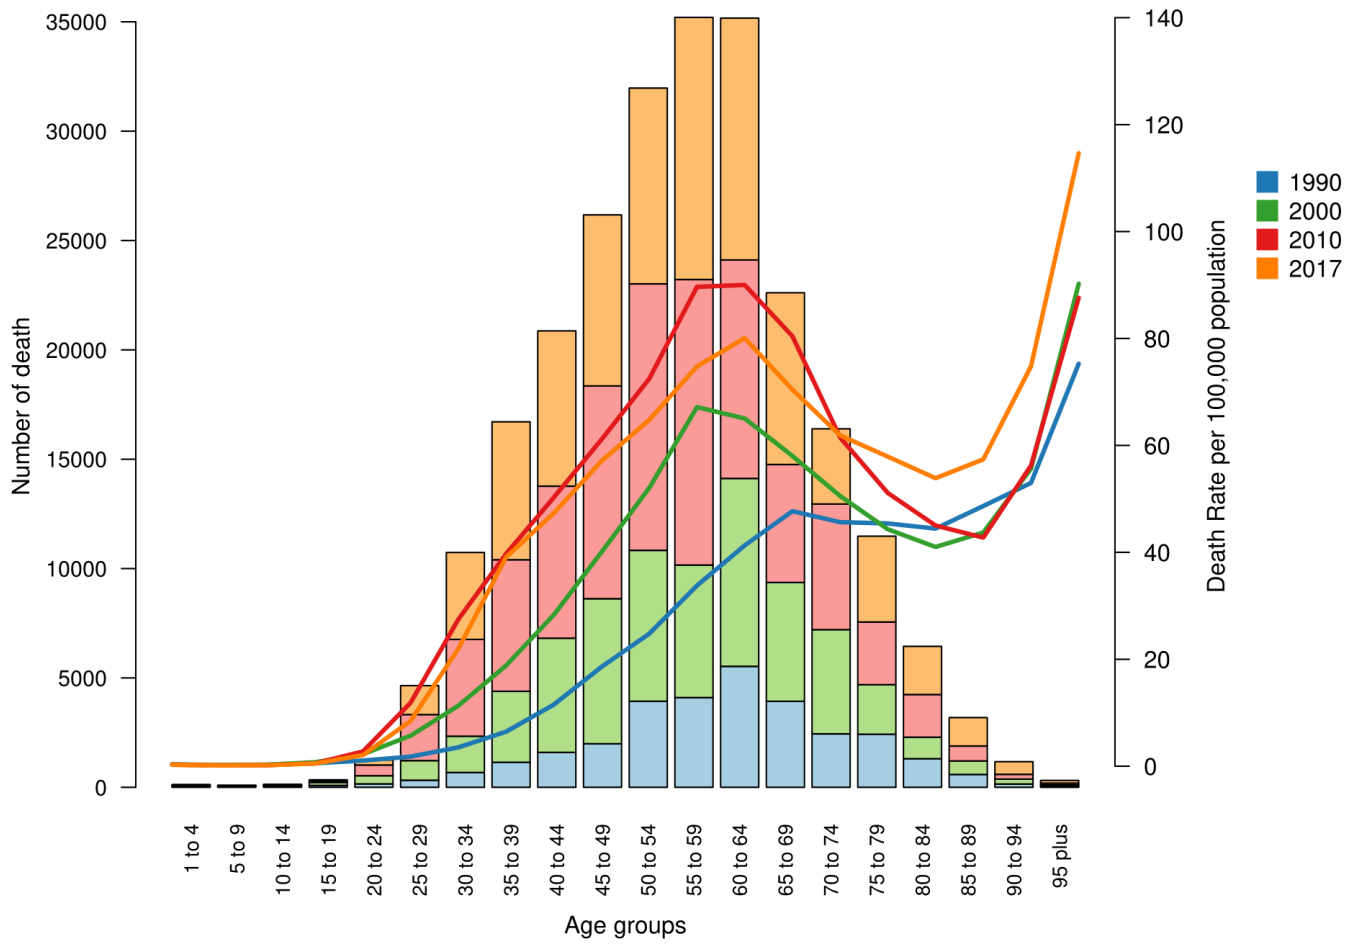

### Central Asia

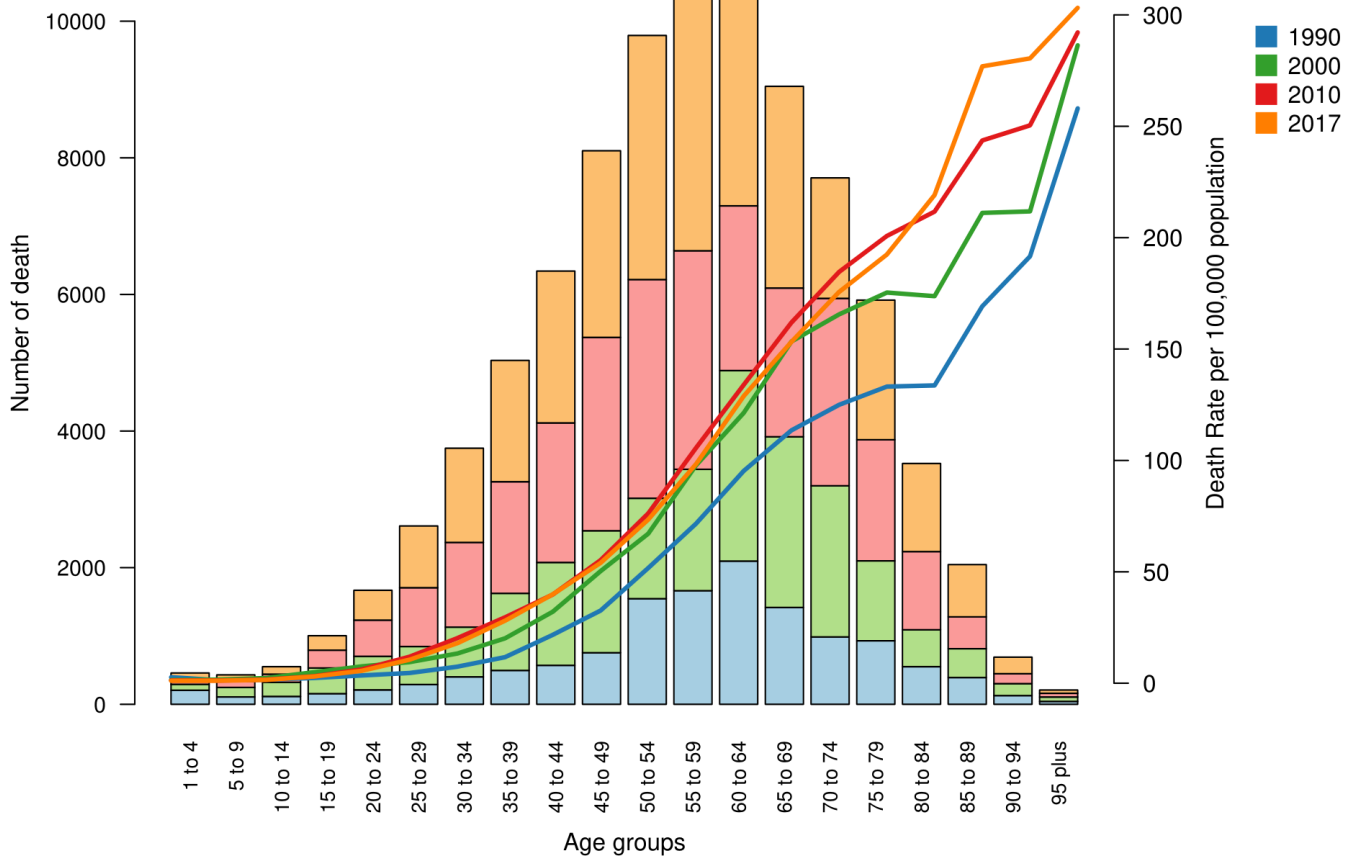



### Southern Latin America

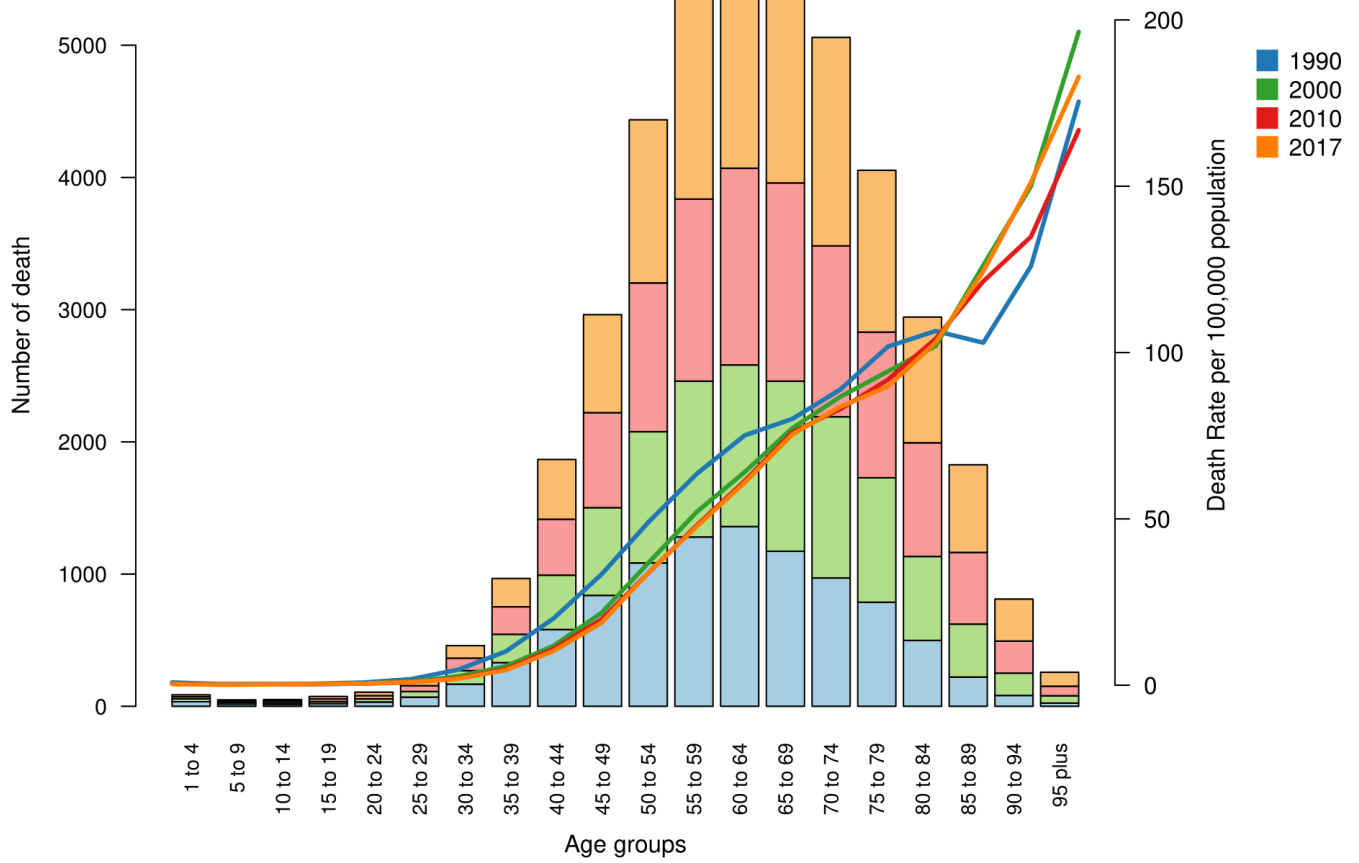

### Andean Latin America

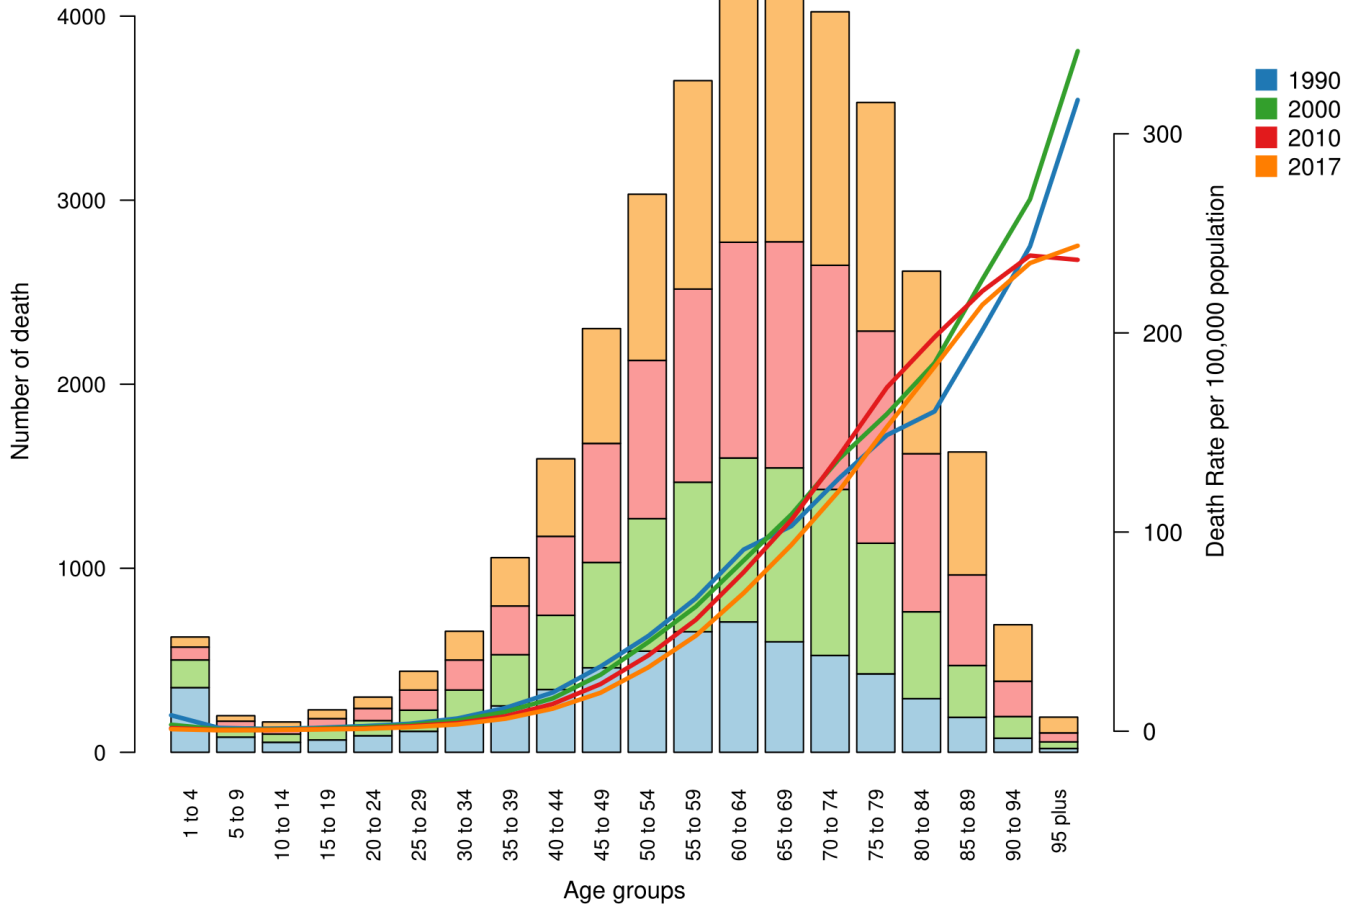

### Central Latin America

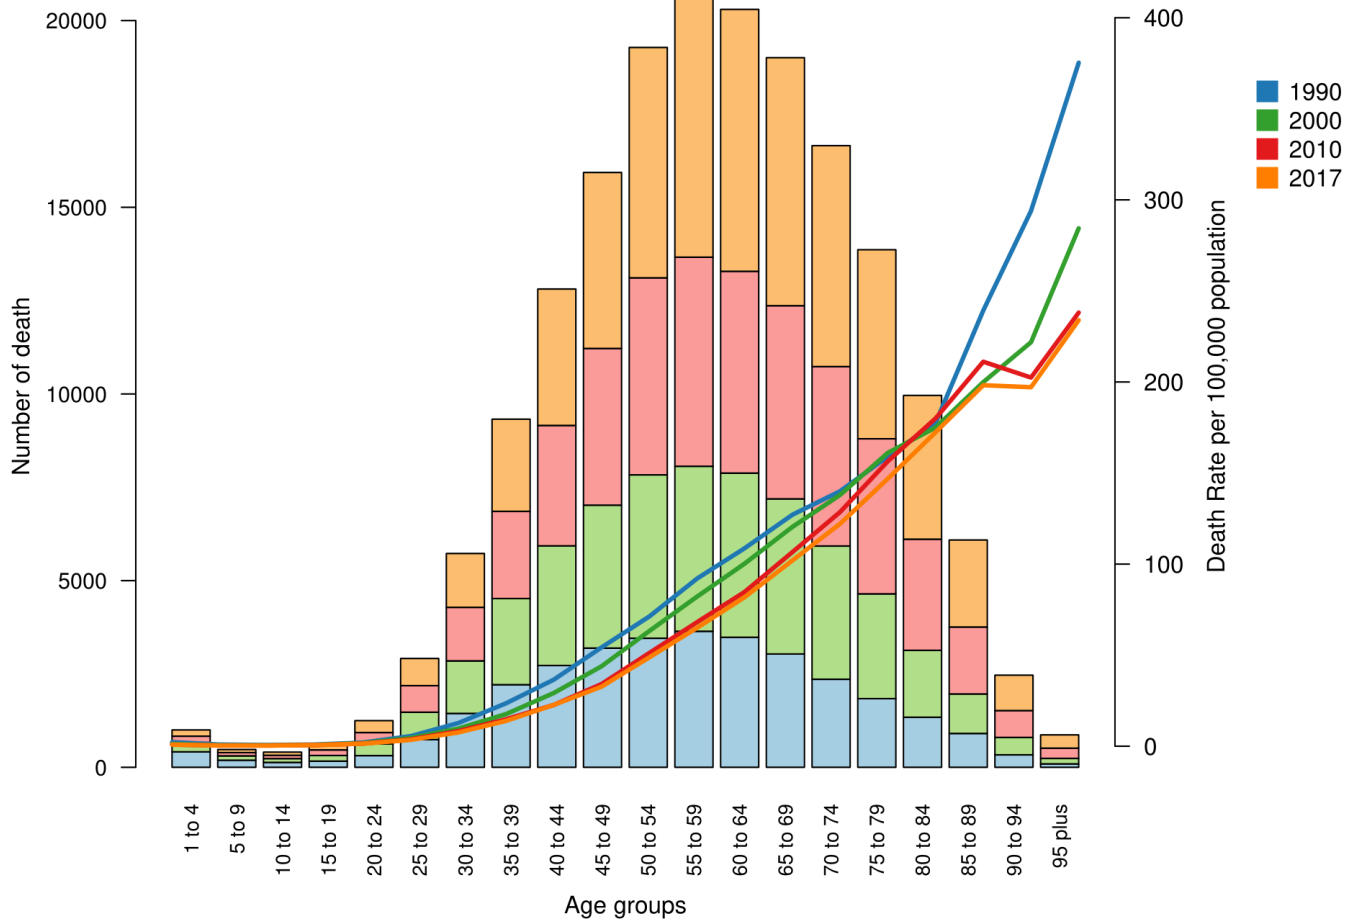

### Tropical Latin America

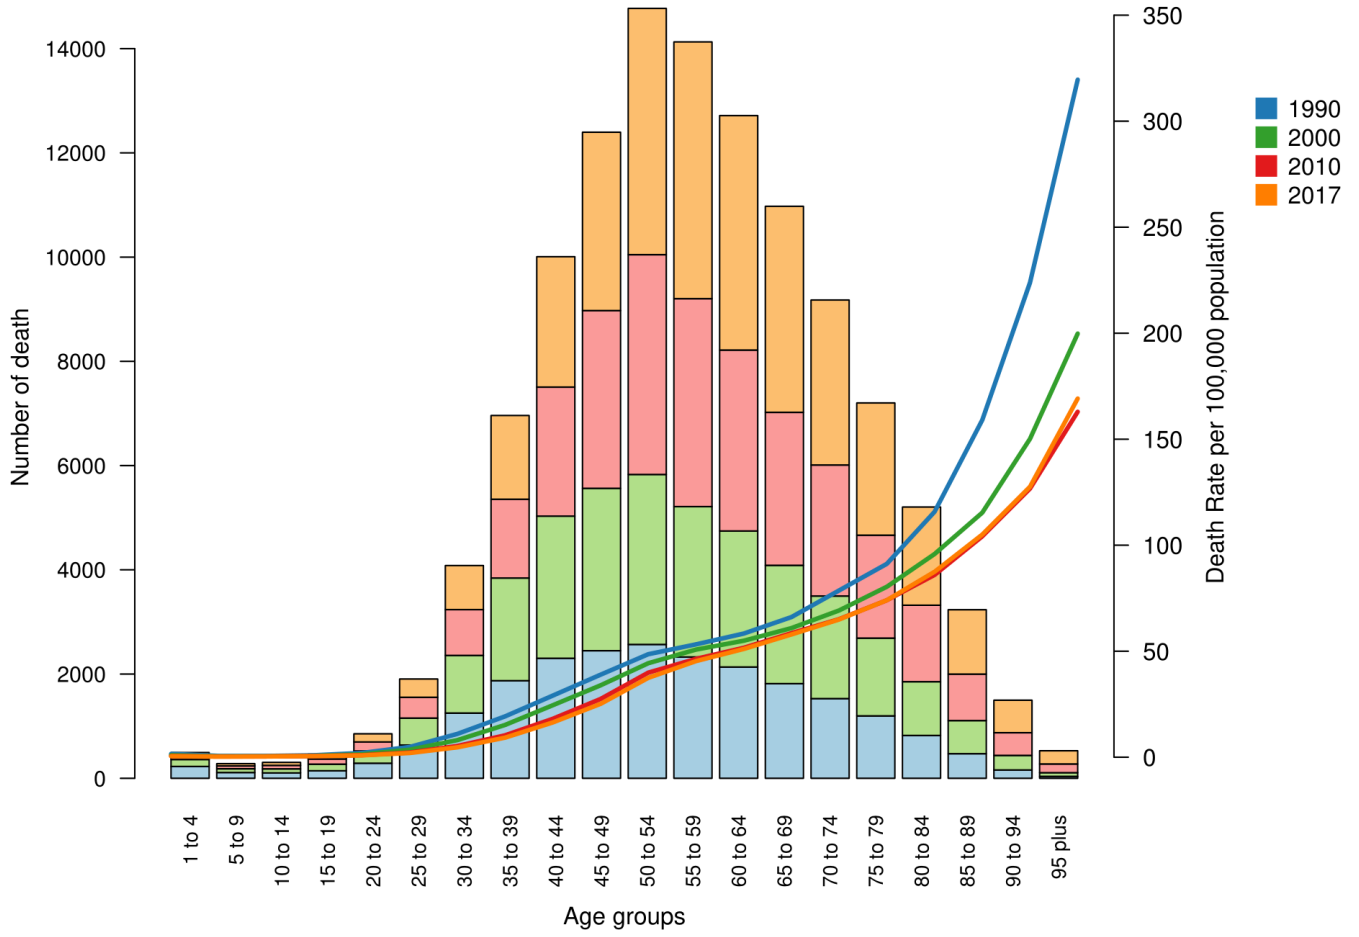

### Caribbean

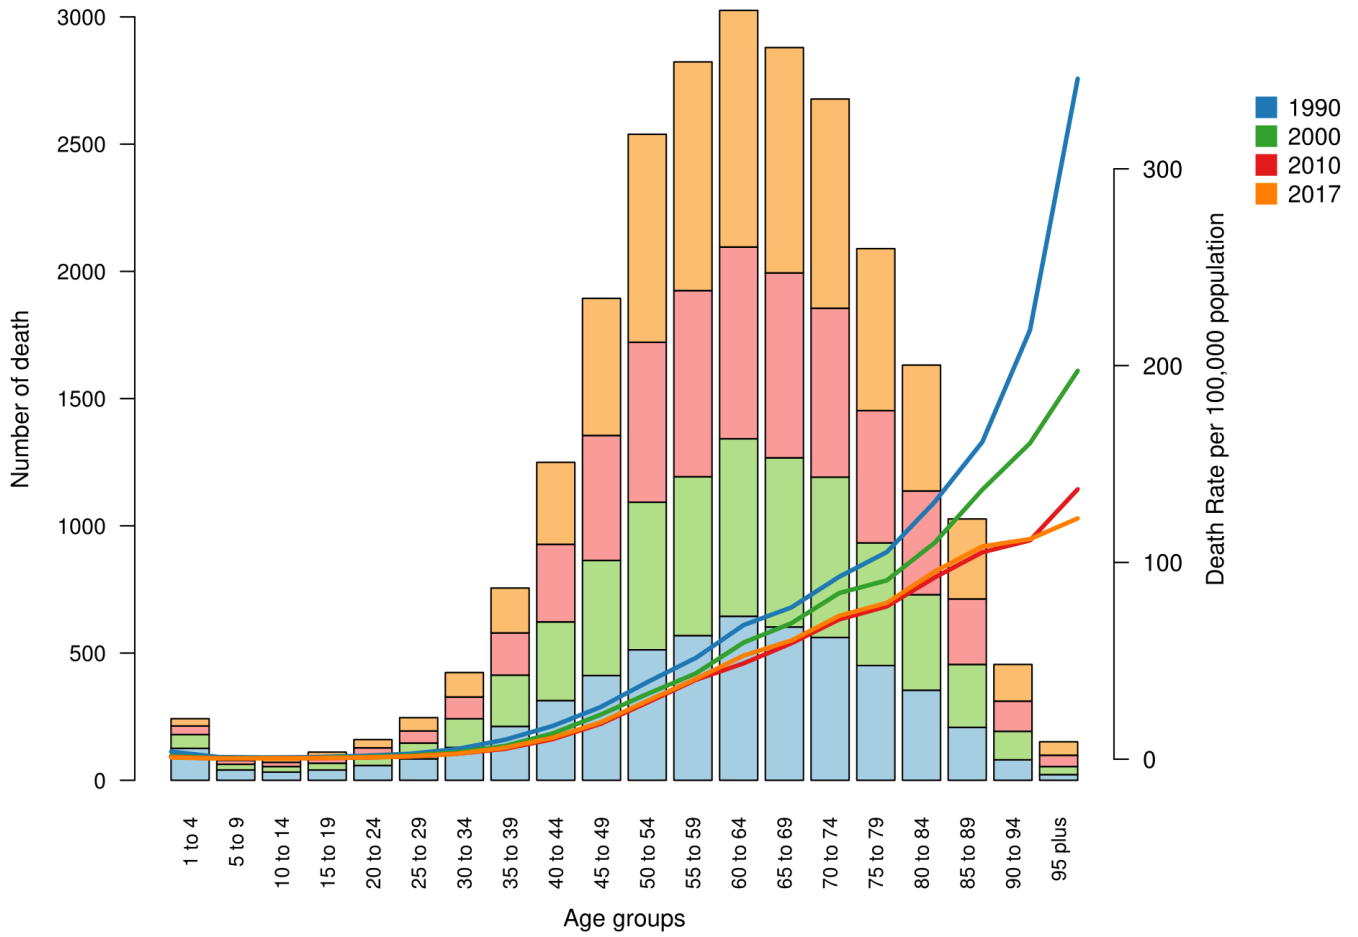

### Oceania

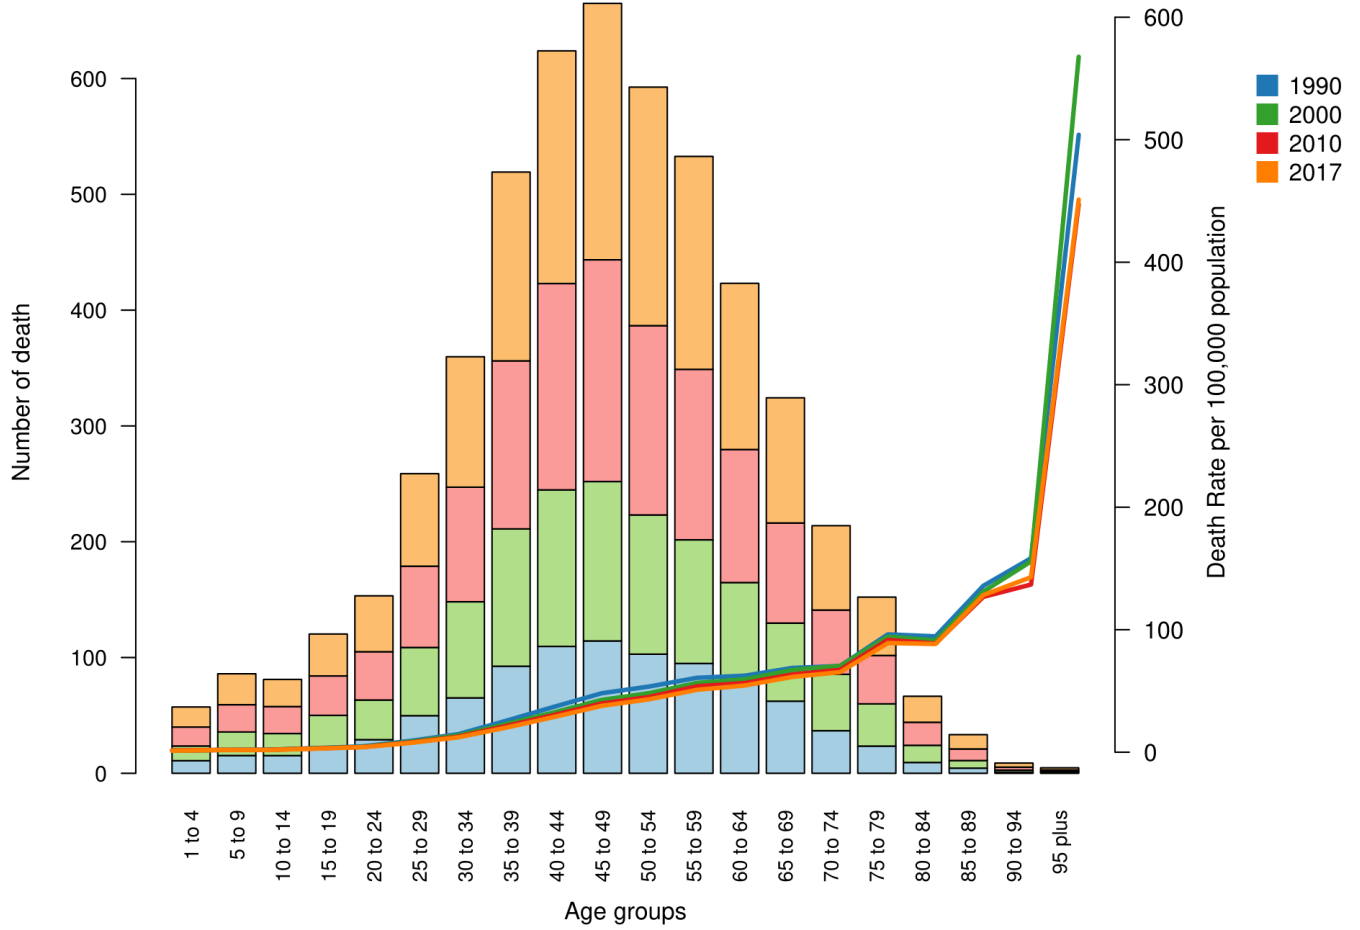

### North Africa and Middle East

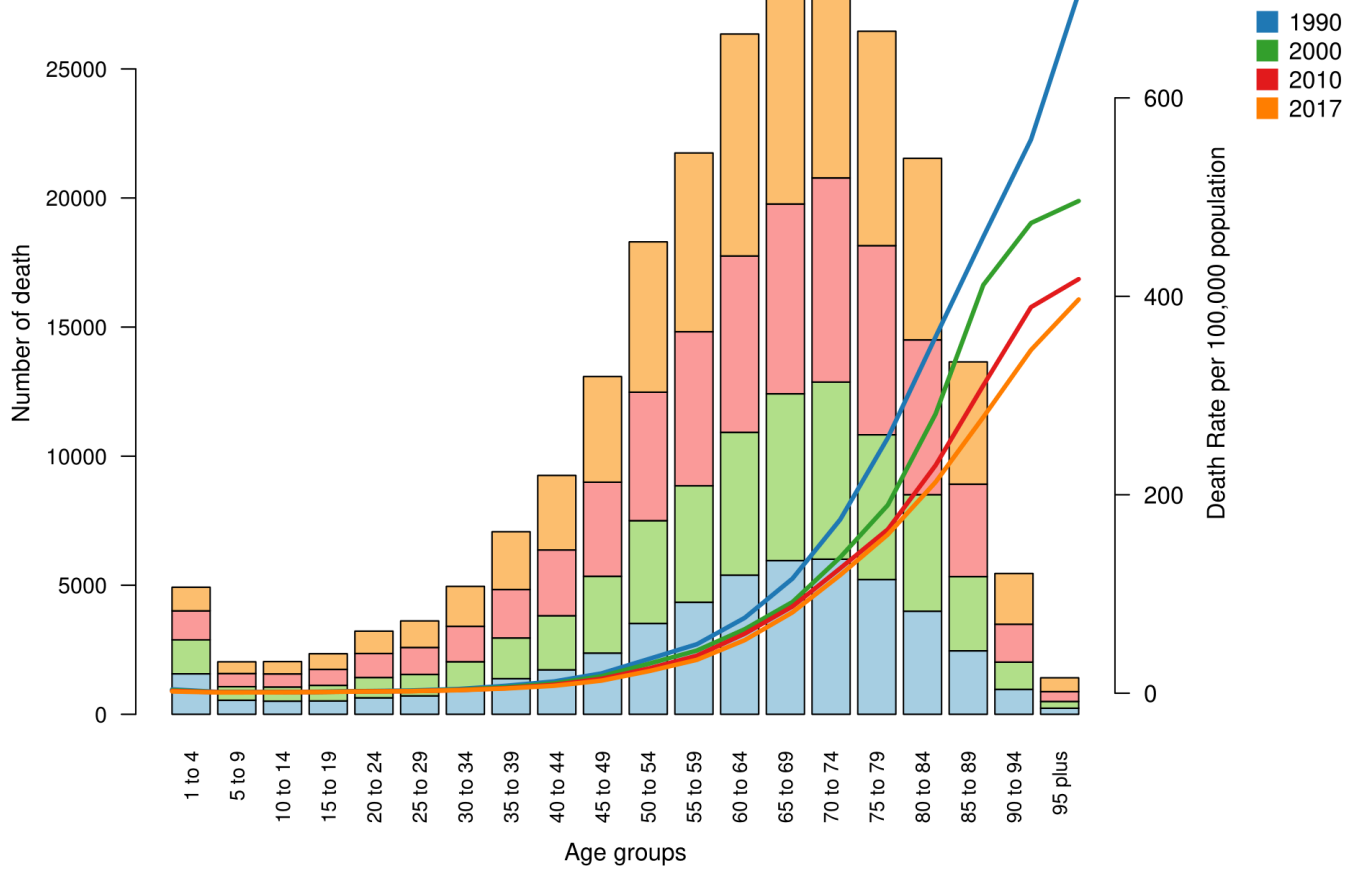

### East Asia

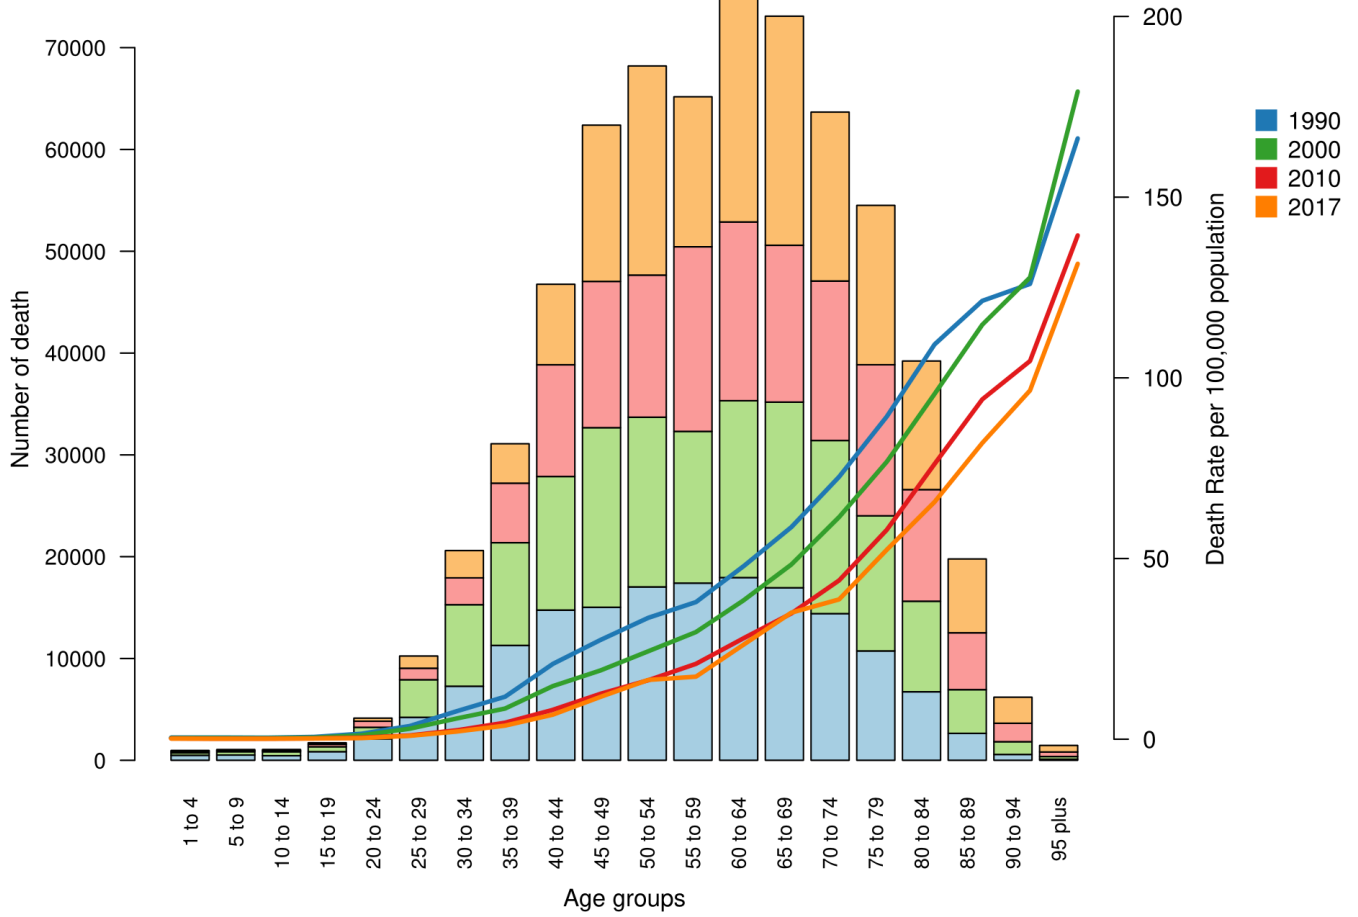



### Southeast Asia

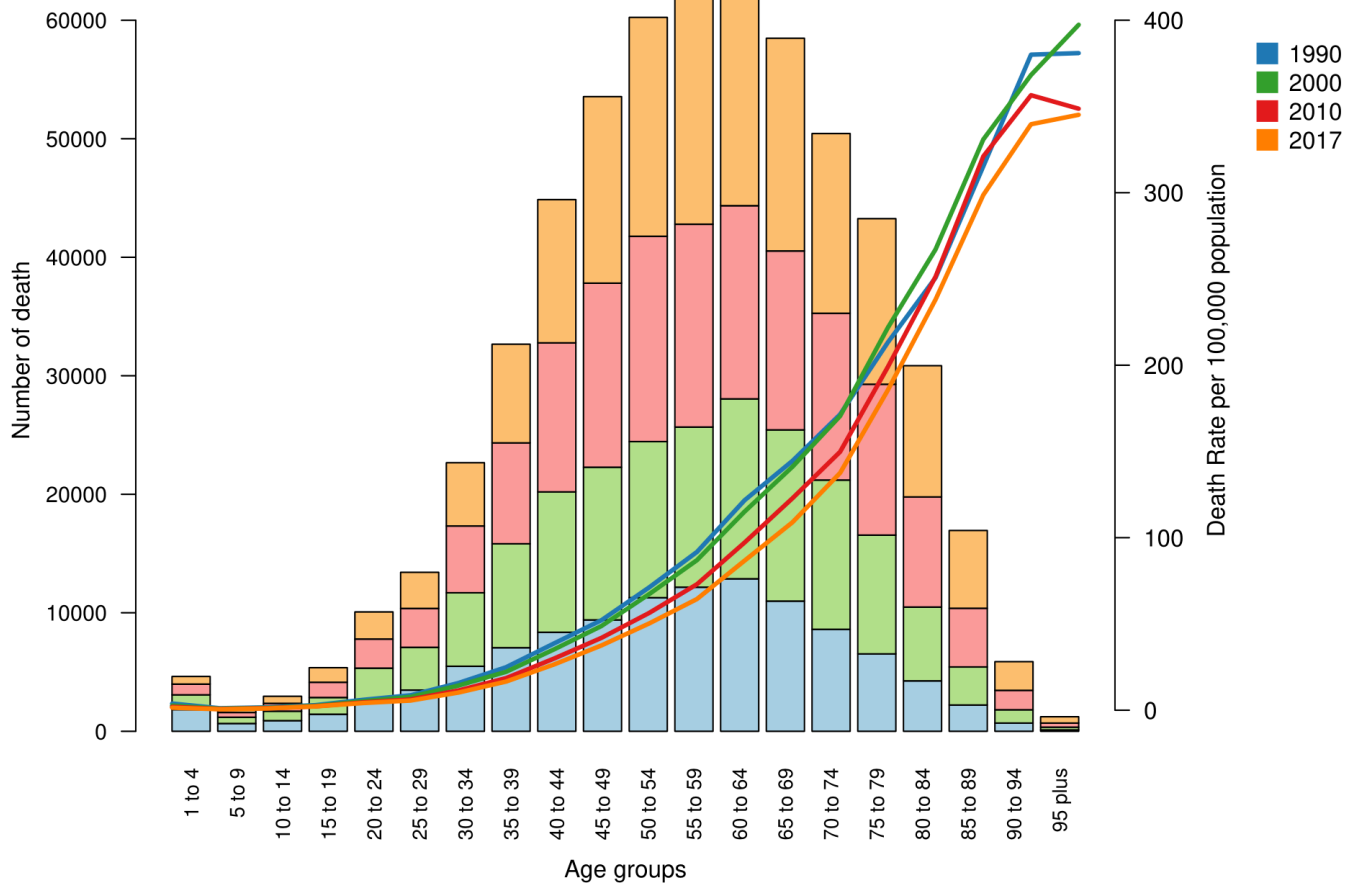

### South Asia

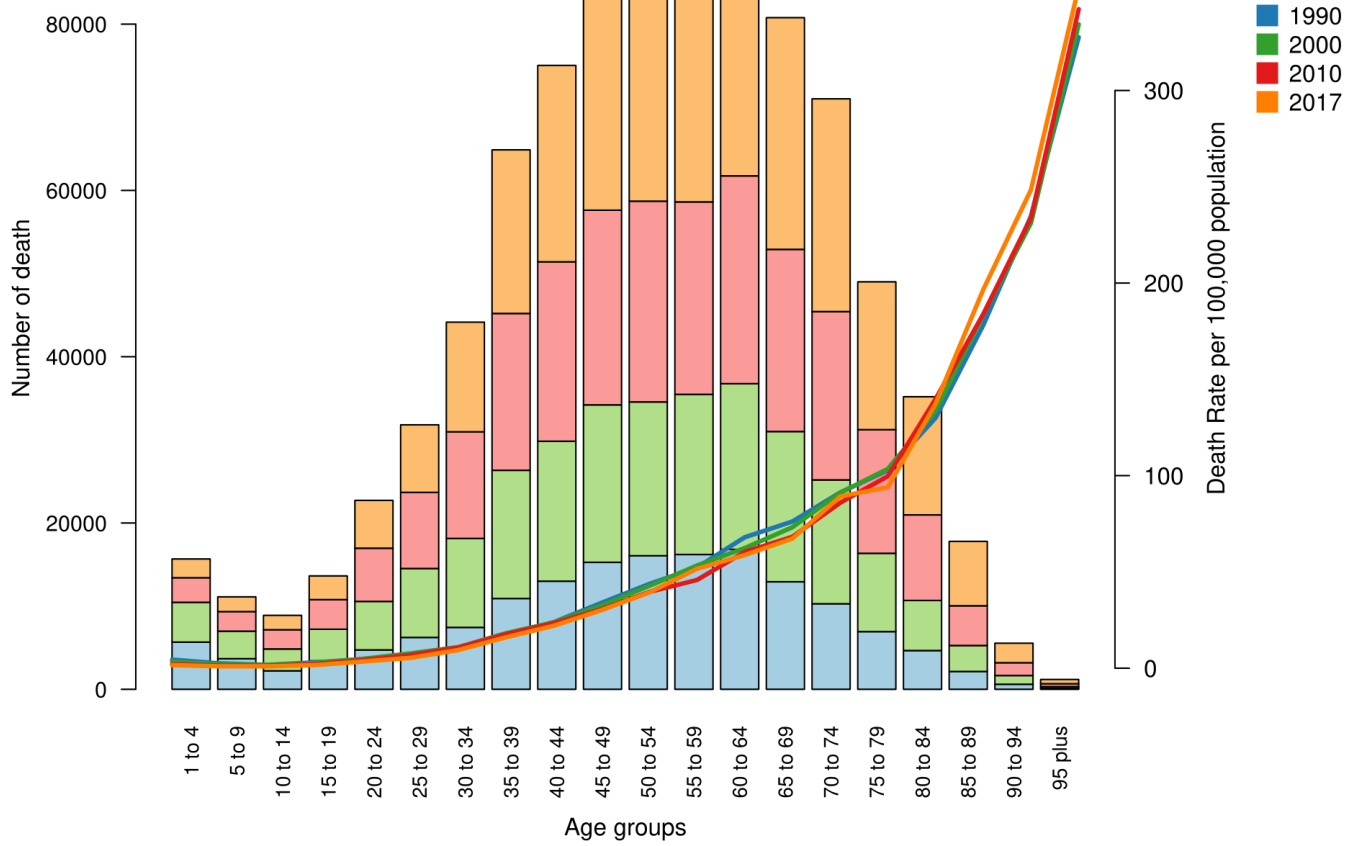

### Central Sub-Saharan Africa

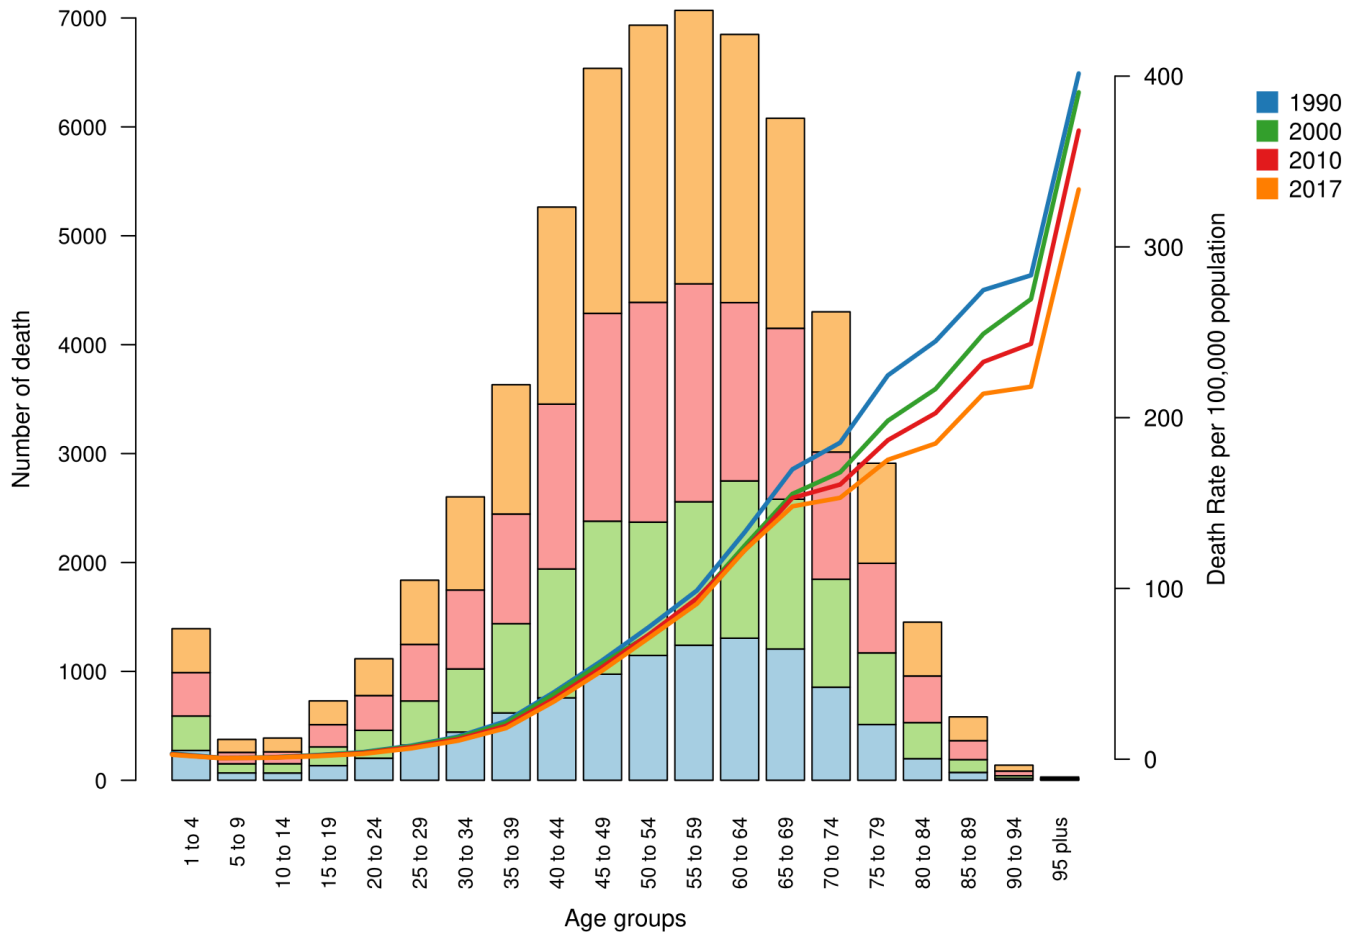

### Eastern Sub-Saharan Africa

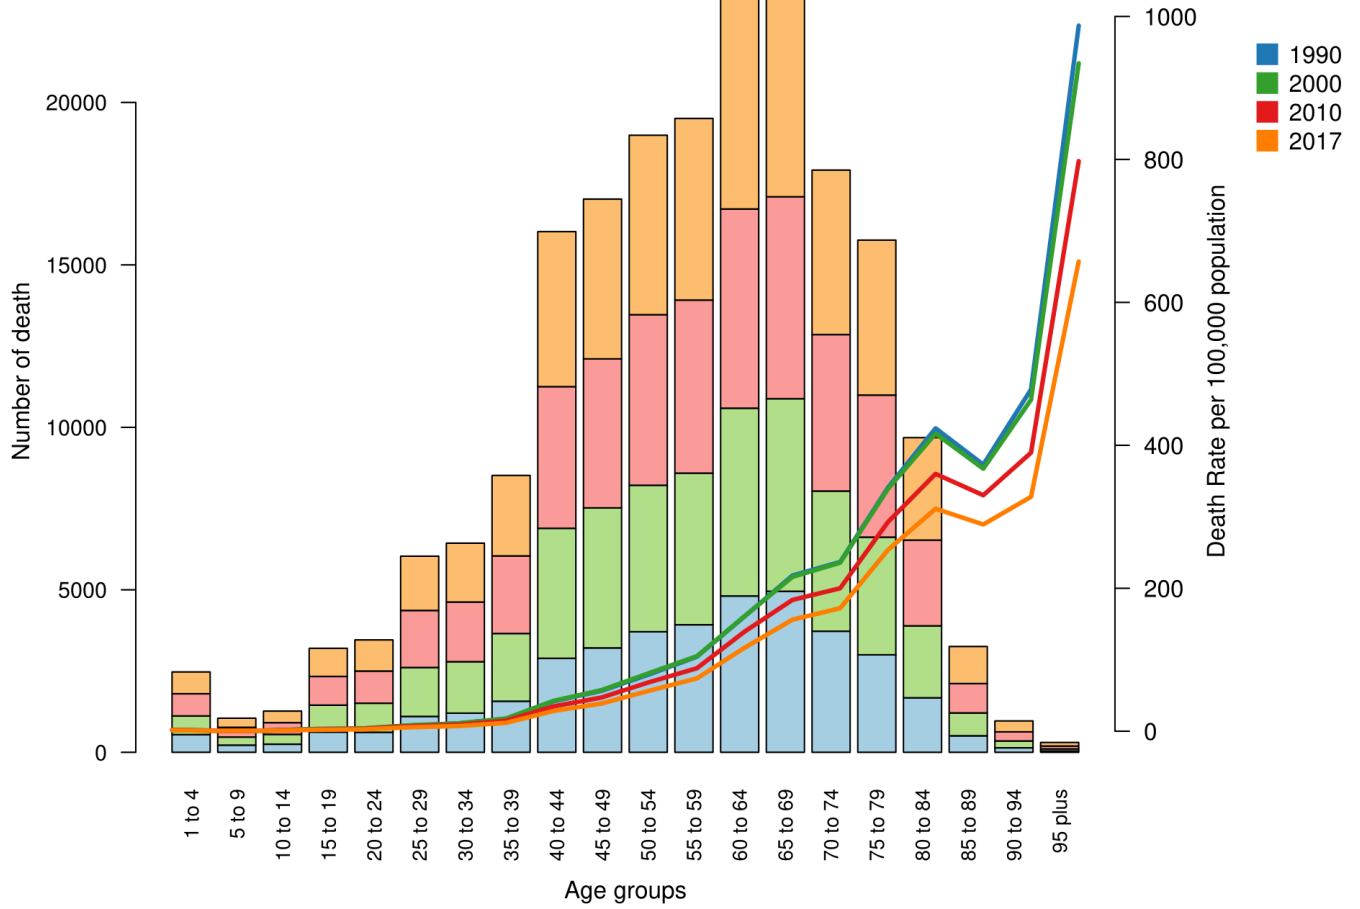

### Southern Sub-Saharan Africa

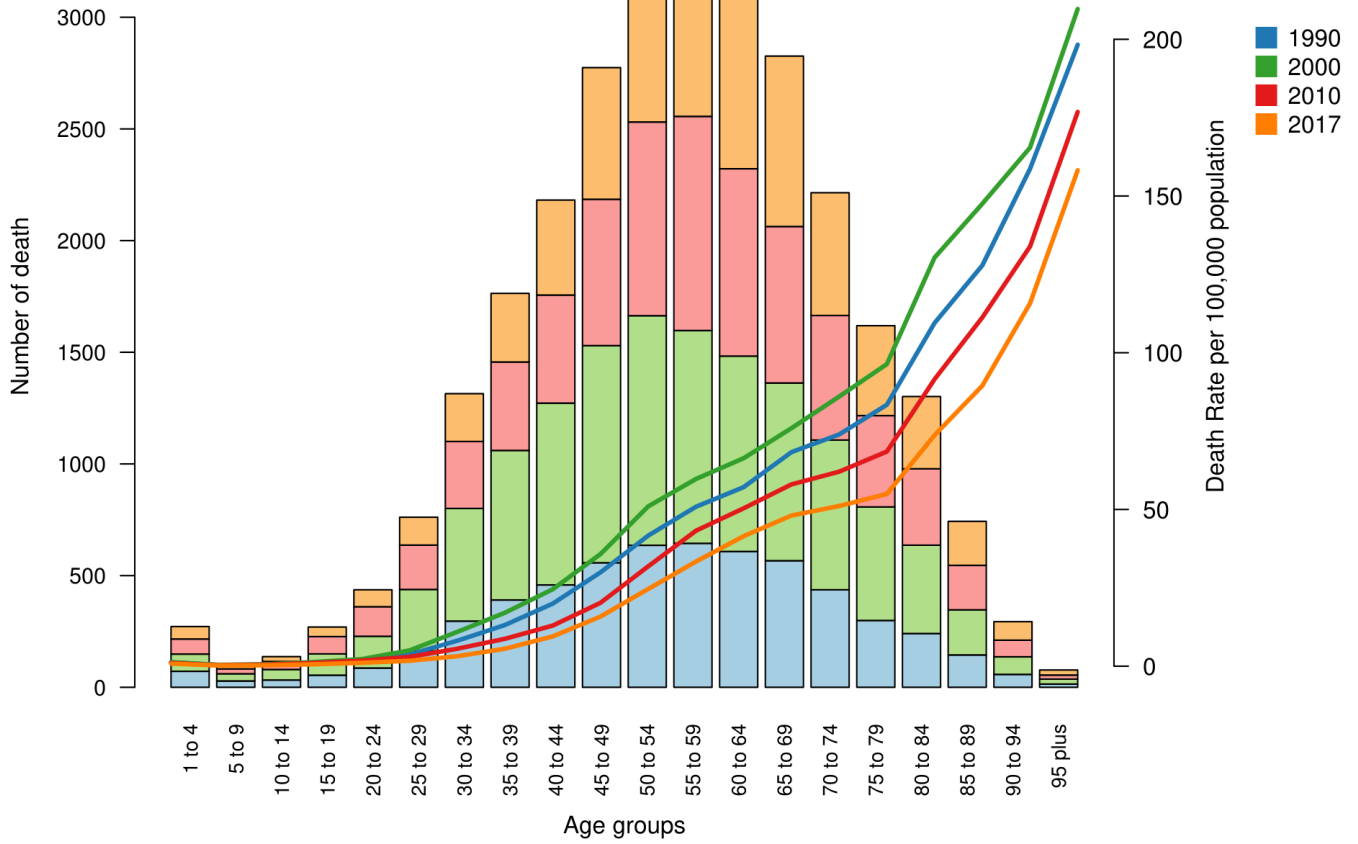

### Western Sub-Saharan Africa

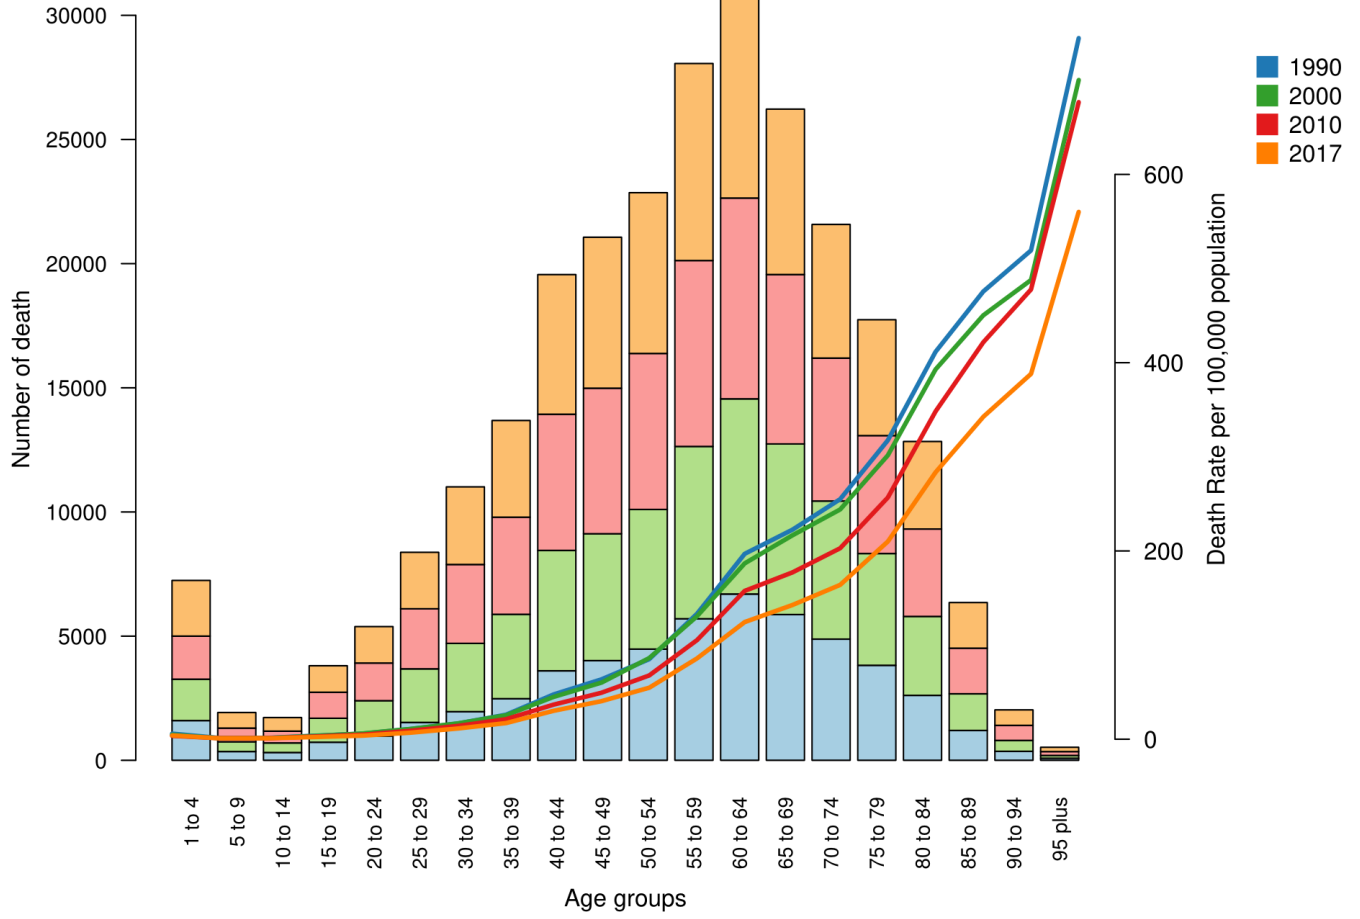

**Appendix Figure 10: The trend of age-standardised rates of A) deaths, B) DALYs due to cirrhosis across nations in 2017, versus levels of SDI. DALYs=disability-adjusted life-years. SDI=Socio-demographic Index.**

**A) Deaths**

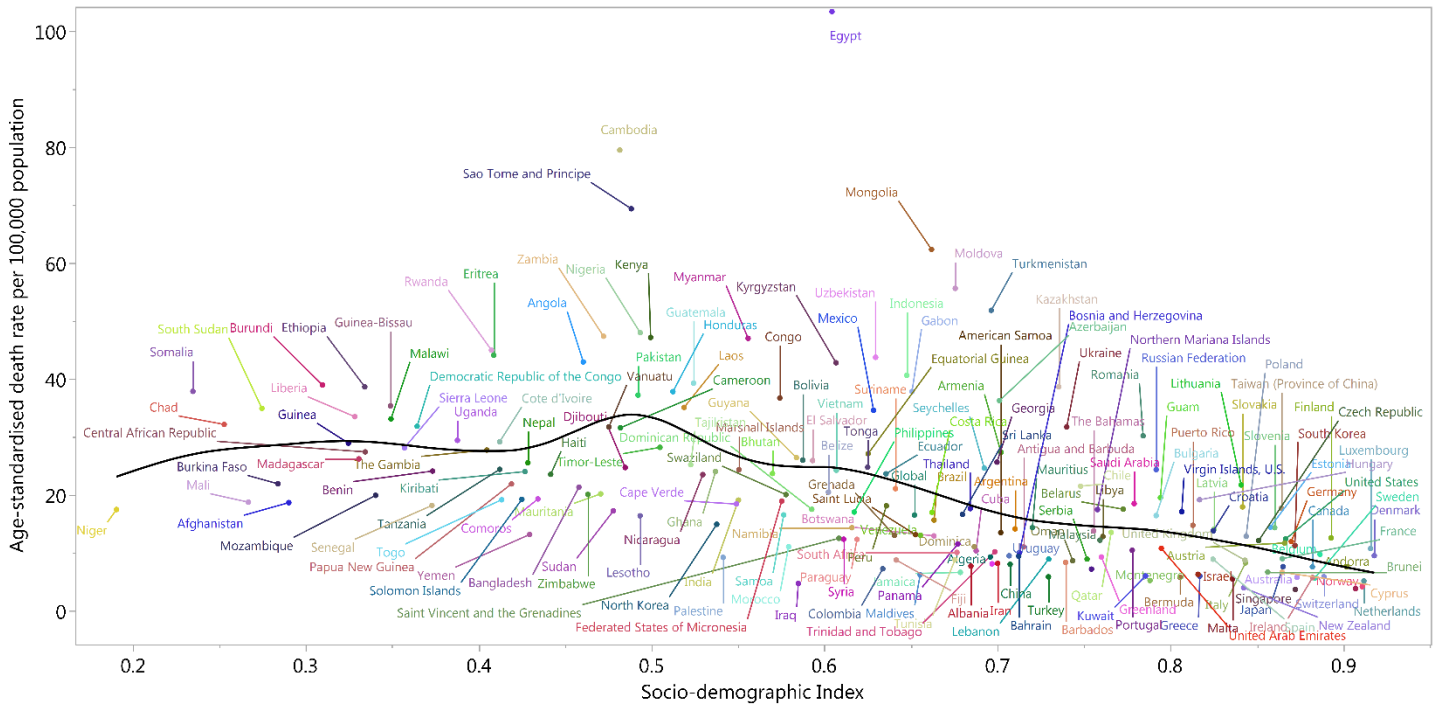

**B) DALYs**

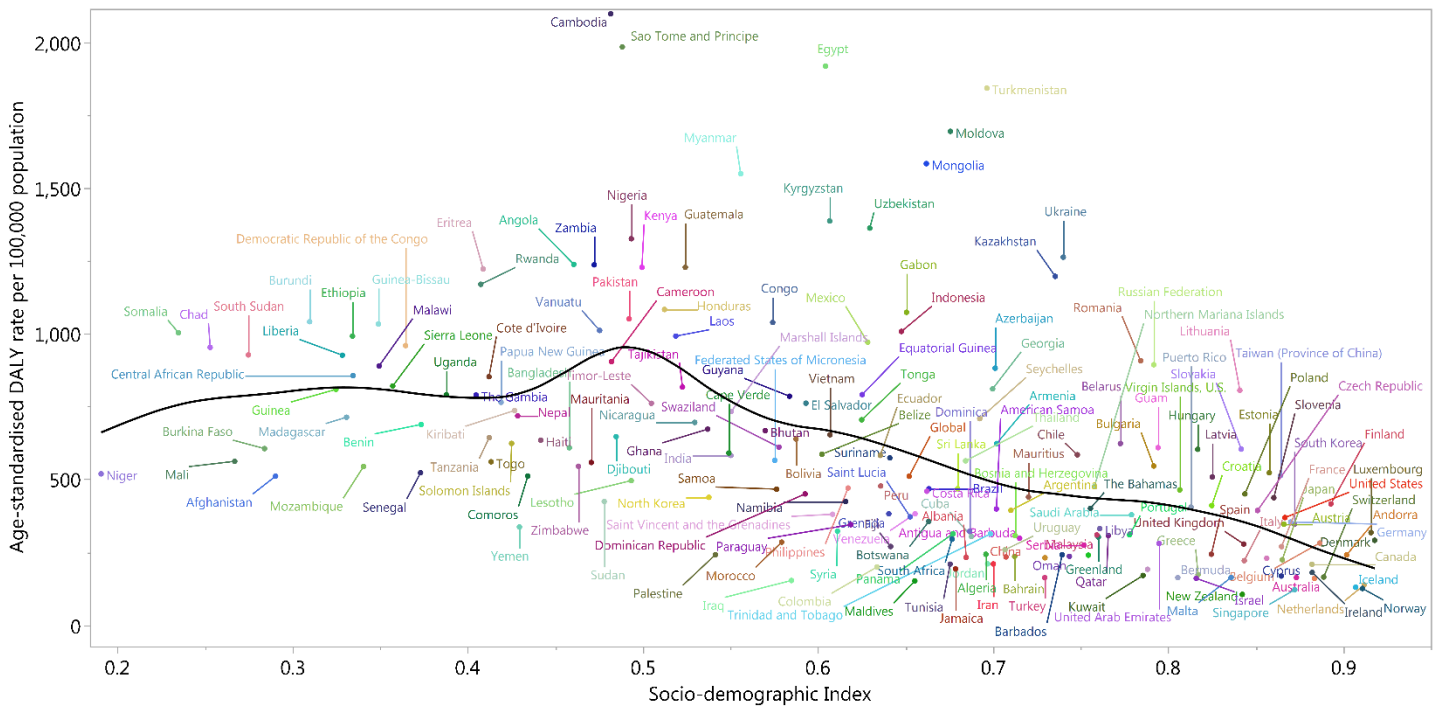

Supplement: mmc1.pdf [file mmc1.pdf]
